# Supplementary material for: Rpd3/CoRest-mediated activity-dependent transcription regulates the flexibility in memory updating in Drosophila
Source: PubMed Central journal article supplement (PMC7840730; doi:10.1038/s41467-021-20898-x), 2021-01-27
Supplement: 41467_2021_20898_MOESM1_ESM.pdf [file 41467_2021_20898_MOESM1_ESM.pdf]

Rpd3/CoRest-mediated activity-dependent transcription regulates the flexibility in memory updating in *Drosophila*

Mai Takakura, Reiko Nakagawa, Takeshi Ota, Yoko Kimura, Man Yung NG, Abdalla G. Alia, Hiroyuki Okuno, Yukinori Hirano

**Supplementary Fig. 1** Rpd3 and CoRest-F act as memory suppressors.

**Supplementary Fig. 2** Optogenetic activation of MB neurons.

**Supplementary Fig. 3** The recovery of the Rpd3/CoRest complex after neural activation.

**Supplementary Fig. 4** The control experiments assessing *kay* mRNA expression.

**Supplementary Fig. 5** Acetylated lysine residues of CoRest-C.

**Supplementary Fig. 6** Acetylation of CoRest-F after neural activation, and CBP-dependent complex change in Rpd3/CoRest.

**Supplementary Fig. 7** The biological process-associated GO terms

**Supplementary Fig. 8** Nuclear RNA-seq analysis from the MB nuclei.

**Supplementary Fig. 9** Expression of the target genes of CoRest-C, Rpd3, and CBP.

**Supplementary Fig. 10** K318 of CoRest-C is important for activity-dependent transcription.

**Supplementary Fig. 11** CoRest-C is not involved in memory which does not require gene expression.

**Supplementary Fig. 12** CoRest-F/Rpd3 is required to limit behavioral flexibility.

**Supplementary Fig. 13** Schematic diagram of MBsw2.

**a**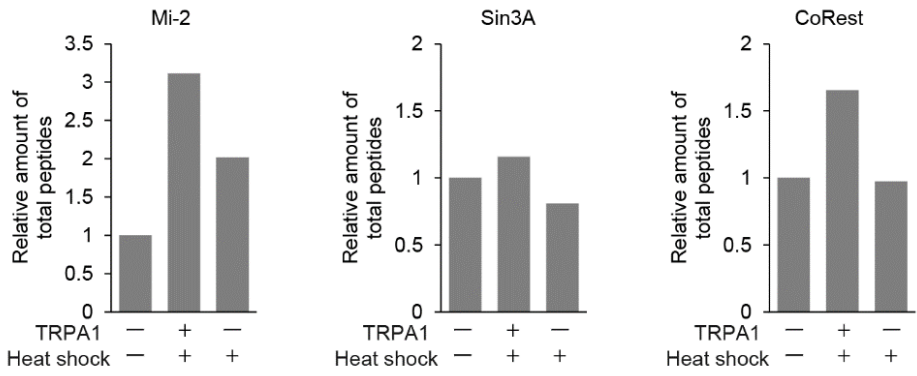**b**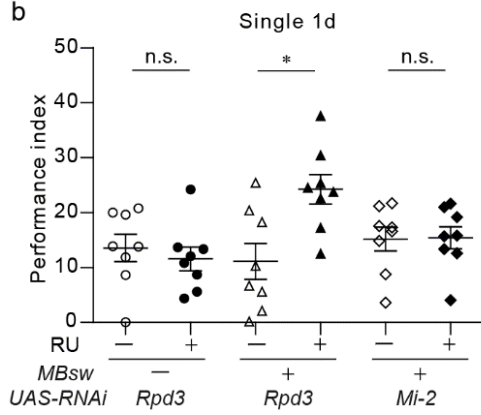**c**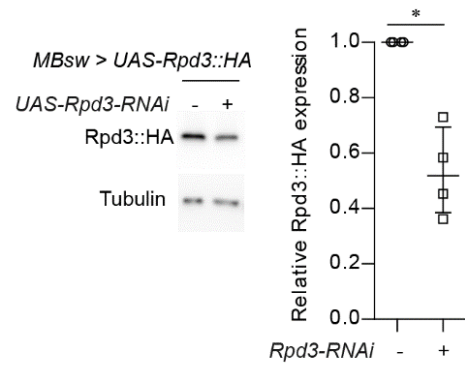**d**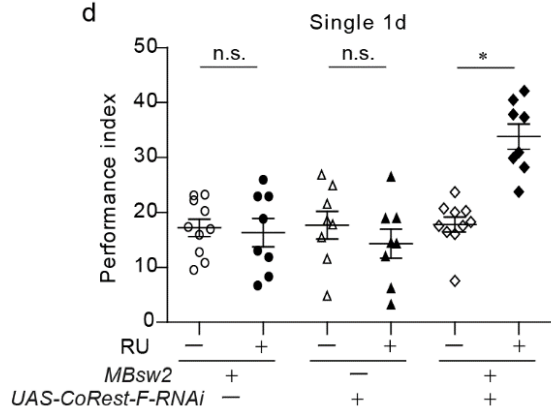**e**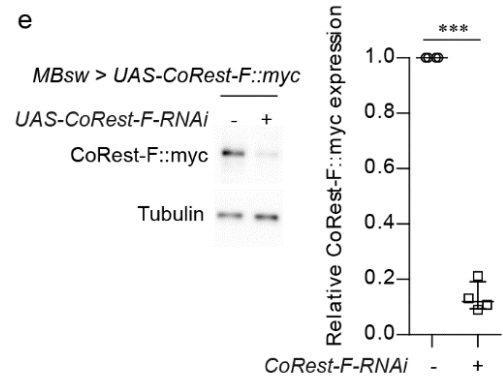**f**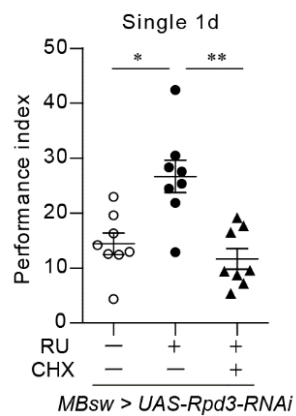**g**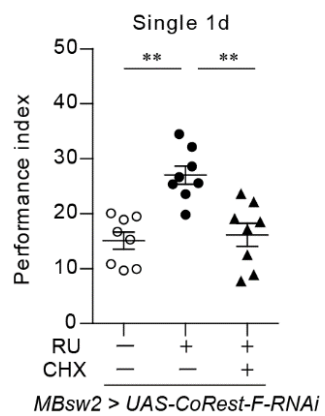

**Supplementary Fig. 1** Rpd3 and CoRest-F act as memory suppressors.

**a**, The relative amounts of the proteins in the Rpd3-immunocomplex (see more details in [Supplementary Table 1](#)) after thermogenetic activation. Rpd3::FLAG-HA was expressed by MBsw, together with dTRPA1. The flies were heat-shocked at 35°C for 1 hour or rested at 25°C, and the heads were used for tandem-tag affinity purification. The amount of each peptide of Mi-2, Sin3A, and CoRest from the Rpd3-immunocomplex, which was determined through the mass spectrometry, was summed and normalized to that of Rpd3.

**b,d**, Knockdown of *Rpd3* or *CoRest-F*, but not *Mi-2*, enhanced 1-day memory formation. The flies with indicated transgenes were fed RU, and 1-day memory after a single training was assessed. Kruskal-Wallis tests (**b**,  $P = 0.0263$ ;  $n = 8$ . **d**,  $P = 0.0012$ ;  $n = 10, 8, 8, 8, 10, 8$ .) followed by Dunn's multiple comparison test (two-sided) were performed.

**c,e**, RNAi targeting *Rpd3* and *CoRest-F* reduced expression of the ectopically induced tagged proteins. The flies carrying the indicated transgenes were fed RU for 3 days, and the head extracts were analyzed by a western blot analysis with anti-HA or anti-myc, and anti-tubulin antibodies. The amount of tubulin was used for normalization. **c**, Two-sided Mann-Whitney U-test,  $P = 0.0100$ ;  $n = 4$ . **e**, Two-sided Mann-Whitney U-test,  $P < 0.0001$ ;  $n = 4$ .

**f,g**, Cycloheximide (CHX) - feeding impaired memory enhancement by knockdown of *Rpd3* or *CoRest-F*. The flies with indicated transgenes were fed RU for 2 days, followed by CHX-feeding for 1 day, then 1-day memory after a single training was assessed. Kruskal-Wallis tests (**f**,  $P = 0.0026$ ;  $n = 8$ . **g**,  $P = 0.0011$ ;  $n = 8$ ) followed by Dunn's multiple comparison test (two-sided) were performed.

Data are represented as mean  $\pm$  s.e.m. n.s., not significant  $P > 0.05$ ; \*,  $P < 0.05$ ; \*\*,  $P <$

0.01; \*\*\*,  $P < 0.001$ , which is based on experimental replicates using different pooled samples, and the number is indicated as n above. Source data are provided as a Source Data file.

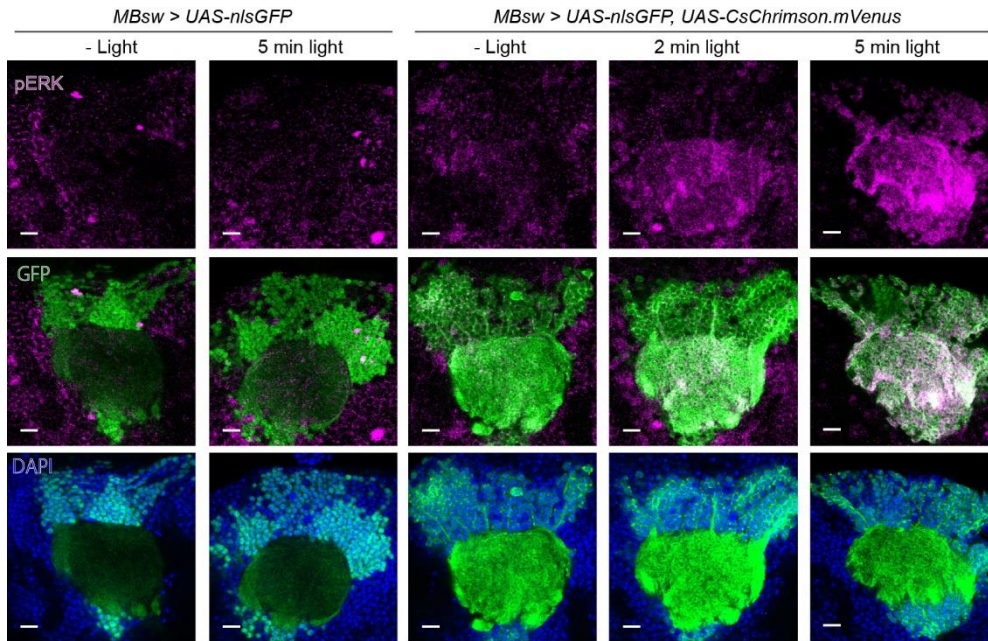

**Supplementary Fig. 2** Optogenetic activation of MB neurons. CsChrimson and GFP fused to a nuclear localization signal (nlsGFP) were induced in MB neurons using MBsw. The brains were immunostained with anti-GFP (green) and anti-pERK (magenta) antibodies, and DAPI (blue). The images are representative of experimental replicates (n = 3, 4, 4, 4, 4). Scale bar: 10  $\mu$ m.

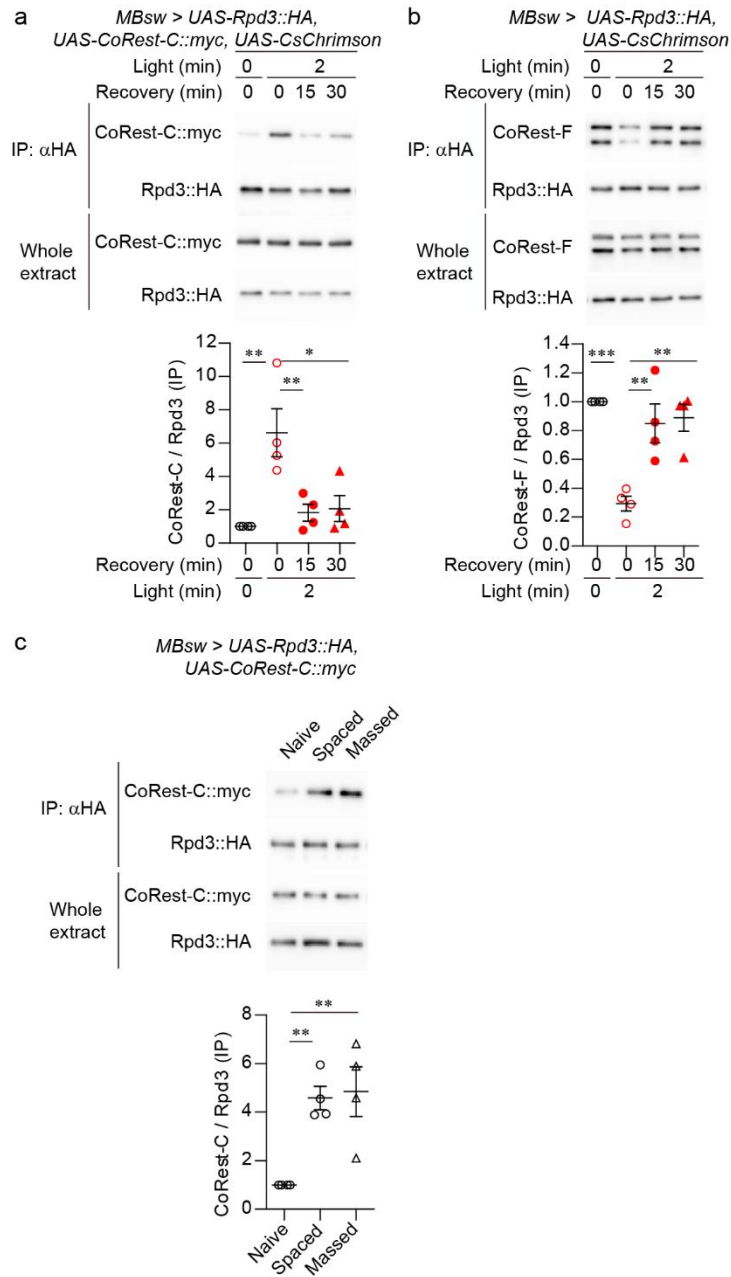

**Supplementary Fig. 3** The recovery of the Rpd3/CoRest complex after neural activation.

**a,b,** The compositional change of the Rpd3/CoRest complex was recovered within 15 min. The flies with the indicated transgenes were fed RU, and illuminated with red light, and recovered for the indicated periods of time.

The head extracts from 100 flies were immunoprecipitated with the anti-HA antibody.

CoRest-F was detected with the anti-CoRest antibody (**b**), and other proteins were detected with the antibodies specific to the indicated epitope tags in a western blot analysis.

**c**, The compositional change of the Rpd3/CoRest complex was induced by olfactory aversive training. The flies with the indicated transgenes were fed RU, subjected to spaced or massed training, and collected immediately after the trainings. Rpd3 proteins were collected from 1,000 heads via immunoprecipitation with the anti-HA antibody, and analyzed as in (**a**).

One-way ANOVA (**a**,  $P = 0.0024$ ;  $n = 4$ . **b**,  $P = 0.0004$ ;  $n = 4$ . **c**,  $P = 0.004$ ;  $n = 4$ .) followed by Tukey's multiple comparisons (two-sided) were performed.

Data are represented as mean  $\pm$  s.e.m. n.s., not significant  $P > 0.05$ ; \*,  $P < 0.05$ ; \*\*,  $P < 0.01$ ; \*\*\*,  $P < 0.001$ , which is based on experimental replicates using different pooled samples, and the number is indicated as n above. Source data are provided as a Source Data file.

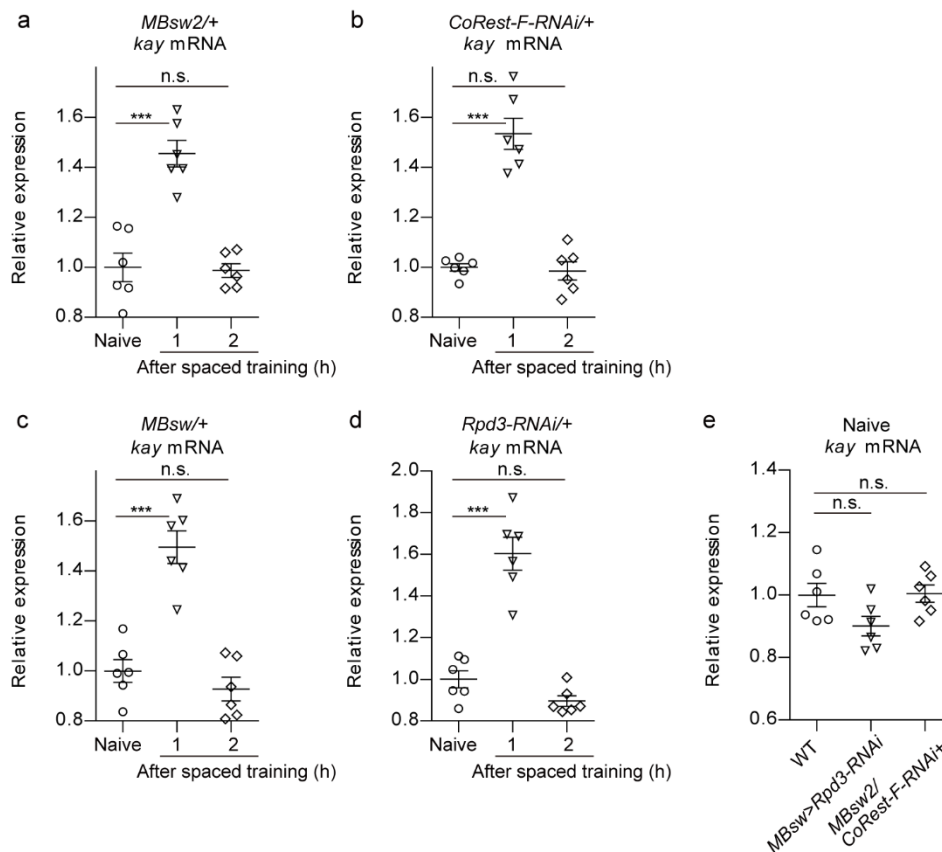

**Supplementary Fig. 4** The control experiments assessing *kay* mRNA expression.

**a-d**, The flies carrying the indicated transgenes were fed RU, and subjected to spaced training. The head RNAs were collected at the indicated time after spaced training, and analyzed via RT-qPCR. A one-way ANOVA ( $P < 0.0001$ ;  $n = 6$  for all) followed by Tukey's multiple comparisons (two-sided) was performed.

**e**, Knockdown of *Rpd3* or *CoRest-F* did not affect basal expression of *kay* mRNA. The flies carrying the indicated transgenes were fed RU. The head RNAs were analyzed via RT-qPCR. A one-way ANOVA ( $P = 0.0658$ ;  $n = 6$ ) followed by Tukey's multiple comparisons (two-sided) was performed.

Data are represented as mean  $\pm$  s.e.m. n.s., not significant  $P > 0.05$ ; \*,  $P < 0.05$ ; \*\*,  $P < 0.01$ ; \*\*\*,  $P < 0.001$ , which is based on experimental replicates using different pooled samples, and the number is indicated as n above. Source data are provided as a Source



Data file.



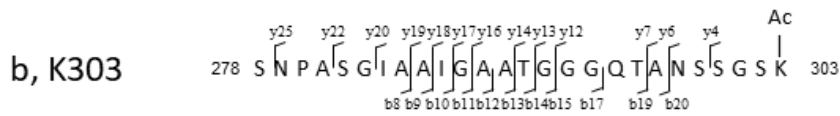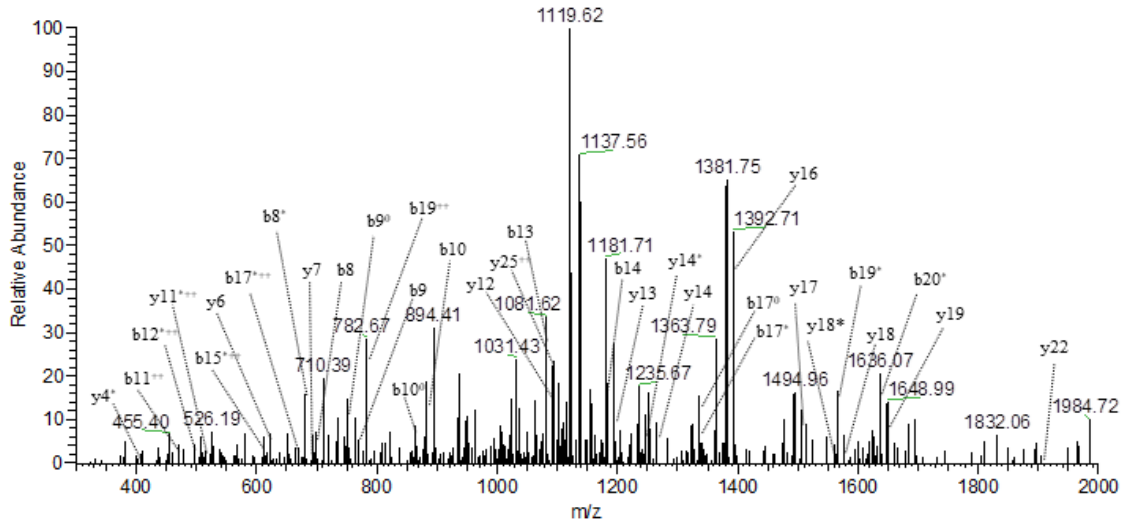

Experimental m/z value : 804.435020,2+  
 Experimental molecular mass : 1606.8555  
 Calculated Monoisotopic mass : 1606.8566  
 Difference (error) between the experimental and calculated masses : -0.70 ppm  
 Ions Score: 13  
 Expect: 0.37

| #  | b      | b <sup>++</sup> | b <sup>*</sup> | b <sup>***</sup> | b <sup>o</sup> | b <sup>o++</sup> | Seq. | y      | y <sup>++</sup> | y <sup>*</sup> | y <sup>***</sup> | y <sup>o</sup> | y <sup>o++</sup> | #  |
|----|--------|-----------------|----------------|------------------|----------------|------------------|------|--------|-----------------|----------------|------------------|----------------|------------------|----|
| 1  | 88.04  | 44.52           |                |                  | 70.03          | 35.52            | S    |        |                 |                |                  |                |                  | 26 |
| 2  | 202.08 | 101.54          | 185.06         | 93.03            | 184.07         | 92.54            | N    | 2187.1 | 1094            | 2170           | 1085.5           | 2169.1         | 1085             | 25 |
| 3  | 299.13 | 150.07          | 282.11         | 141.56           | 281.12         | 141.07           | P    | 2073   | 1037            | 2056           | 1028.5           | 2055           | 1028             | 24 |
| 4  | 370.17 | 185.59          | 353.15         | 177.08           | 352.16         | 176.58           | A    | 1976   | 988.49          | 1958.9         | 979.97           | 1958           | 979.48           | 23 |
| 5  | 457.2  | 229.11          | 440.18         | 220.59           | 439.19         | 220.1            | S    | 1904.9 | 952.97          | 1887.9         | 944.46           | 1886.9         | 943.96           | 22 |
| 6  | 514.23 | 257.62          | 497.2          | 249.1            | 496.22         | 248.61           | G    | 1817.9 | 909.45          | 1800.9         | 900.94           | 1799.9         | 900.45           | 21 |
| 7  | 627.31 | 314.16          | 610.28         | 305.65           | 609.3          | 305.15           | I    | 1760.9 | 880.94          | 1743.9         | 872.43           | 1742.9         | 871.94           | 20 |
| 8  | 698.35 | 349.68          | 681.32         | 341.16           | 680.34         | 340.67           | A    | 1647.8 | 824.4           | 1630.8         | 815.89           | 1629.8         | 815.39           | 19 |
| 9  | 769.38 | 385.2           | 752.36         | 376.68           | 751.37         | 376.19           | A    | 1576.8 | 788.88          | 1559.7         | 780.37           | 1558.8         | 779.88           | 18 |
| 10 | 882.47 | 441.74          | 865.44         | 433.22           | 864.46         | 432.73           | I    | 1505.7 | 753.36          | 1488.7         | 744.85           | 1487.7         | 744.36           | 17 |
| 11 | 939.49 | 470.25          | 922.46         | 461.74           | 921.48         | 461.24           | G    | 1392.6 | 696.82          | 1375.6         | 688.31           | 1374.6         | 687.82           | 16 |
| 12 | 1010.5 | 505.77          | 993.5          | 497.25           | 992.52         | 496.76           | A    | 1335.6 | 668.31          | 1318.6         | 659.8            | 1317.6         | 659.31           | 15 |
| 13 | 1081.6 | 541.29          | 1064.5         | 532.77           | 1063.6         | 532.28           | A    | 1264.6 | 632.79          | 1247.6         | 624.28           | 1246.6         | 623.79           | 14 |
| 14 | 1182.6 | 591.81          | 1165.6         | 583.3            | 1164.6         | 582.8            | T    | 1193.5 | 597.27          | 1176.5         | 588.76           | 1175.5         | 588.27           | 13 |
| 15 | 1239.6 | 620.32          | 1222.6         | 611.81           | 1221.6         | 611.31           | G    | 1092.5 | 546.75          | 1075.5         | 538.24           | 1074.5         | 537.74           | 12 |
| 16 | 1296.7 | 648.83          | 1279.6         | 640.32           | 1278.6         | 639.83           | G    | 1035.5 | 518.24          | 1018.4         | 509.73           | 1017.5         | 509.23           | 11 |
| 17 | 1353.7 | 677.34          | 1336.7         | 668.83           | 1335.7         | 668.34           | G    | 978.45 | 489.73          | 961.42         | 481.21           | 960.44         | 480.72           | 10 |
| 18 | 1481.7 | 741.37          | 1464.7         | 732.86           | 1463.7         | 732.37           | Q    | 921.43 | 461.22          | 904.4          | 452.7            | 903.42         | 452.21           | 9  |
| 19 | 1582.8 | 791.89          | 1565.8         | 783.38           | 1564.8         | 782.89           | T    | 793.37 | 397.19          | 776.34         | 388.67           | 775.36         | 388.18           | 8  |
| 20 | 1653.8 | 827.41          | 1636.8         | 818.9            | 1635.8         | 818.41           | A    | 692.32 | 346.66          | 675.29         | 338.15           | 674.31         | 337.66           | 7  |
| 21 | 1767.9 | 884.43          | 1750.8         | 875.92           | 1749.9         | 875.43           | N    | 621.28 | 311.15          | 604.26         | 302.63           | 603.27         | 302.14           | 6  |
| 22 | 1854.9 | 927.95          | 1837.9         | 919.44           | 1836.9         | 918.95           | S    | 507.24 | 254.12          | 490.21         | 245.61           | 489.23         | 245.12           | 5  |
| 23 | 1941.9 | 971.47          | 1924.9         | 962.95           | 1923.9         | 962.46           | S    | 420.21 | 210.61          | 403.18         | 202.09           | 402.2          | 201.6            | 4  |
| 24 | 1999   | 999.98          | 1981.9         | 991.46           | 1980.9         | 990.97           | G    | 333.18 | 167.09          | 316.15         | 158.58           | 315.17         | 158.09           | 3  |
| 25 | 2086   | 1043.5          | 2069           | 1035             | 2068           | 1034.5           | S    | 276.16 | 138.58          | 259.13         | 130.07           | 258.14         | 129.58           | 2  |
| 26 |        |                 |                |                  |                |                  | K    | 189.12 | 95.07           | 172.1          | 86.55            |                |                  | 1  |

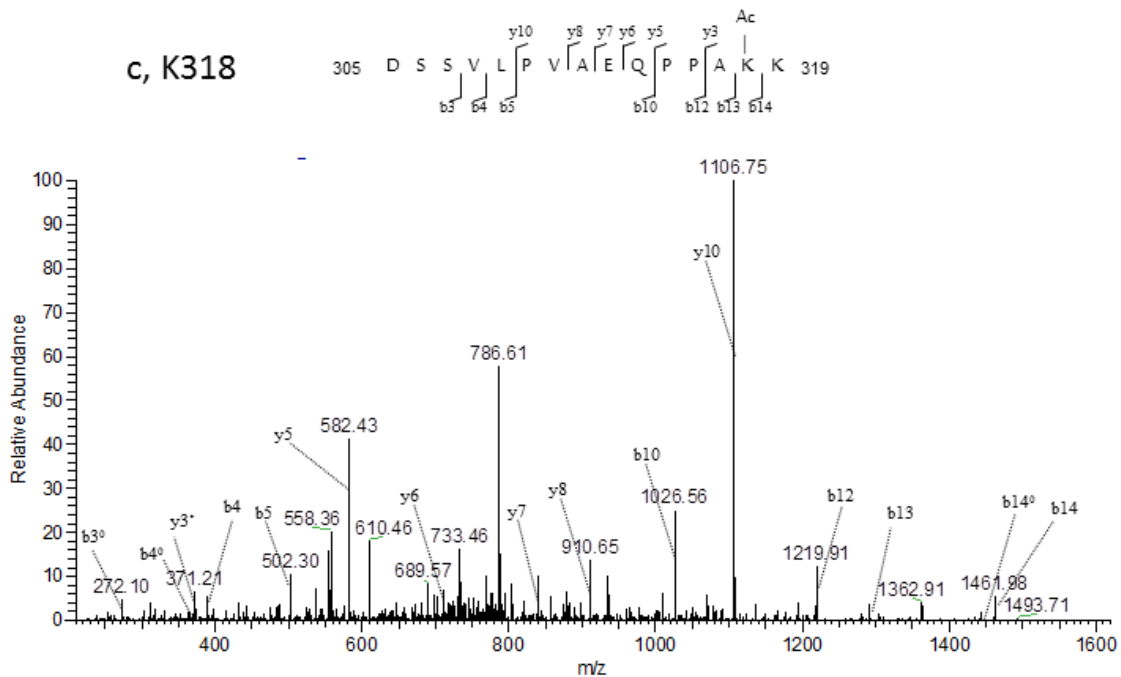

Experimental m/z value : 804.435020,2+  
 Experimental molecular mass : 1606.8555  
 Calculated Monoisotopic mass : 1606.8566  
 Difference (error) between the experimental and calculated masses : -0.70 ppm  
 Ions Score: 40  
 Expect: 0.0026

| #  | b             | b <sup>++</sup> | b <sup>*</sup> | b <sup>+++</sup> | b <sup>o</sup> | b <sup>o++</sup> | Seq. | y             | y <sup>++</sup> | y <sup>*</sup> | y <sup>+++</sup> | y <sup>o</sup> | y <sup>o++</sup> | #  |
|----|---------------|-----------------|----------------|------------------|----------------|------------------|------|---------------|-----------------|----------------|------------------|----------------|------------------|----|
| 1  | 116.03        | 58.52           |                |                  | 98.02          | 49.52            | D    |               |                 |                |                  |                |                  | 15 |
| 2  | 203.07        | 102.04          |                |                  | 185.06         | 93.03            | S    | 1492.8        | 746.92          | 1475.8         | 738.41           | 1474.8         | 737.92           | 14 |
| 3  | 290.1         | 145.55          |                |                  | 272.09         | 136.55           | S    | 1405.8        | 703.41          | 1388.8         | 694.89           | 1387.8         | 694.4            | 13 |
| 4  | <b>389.17</b> | 195.09          |                |                  | 371.16         | 186.08           | V    | 1318.8        | 659.89          | 1301.8         | 651.38           | 1300.8         | 650.88           | 12 |
| 5  | <b>502.25</b> | 251.63          |                |                  | 484.24         | 242.62           | L    | <b>1219.7</b> | 610.36          | 1202.7         | 601.84           | 1201.7         | 601.35           | 11 |
| 6  | 599.3         | 300.16          |                |                  | 581.29         | 291.15           | P    | <b>1106.6</b> | 553.81          | 1089.6         | 545.3            | 1088.6         | 544.81           | 10 |
| 7  | 698.37        | 349.69          |                |                  | 680.36         | 340.68           | V    | 1009.6        | 505.29          | 992.54         | 496.77           | 991.56         | 496.28           | 9  |
| 8  | 769.41        | 385.21          |                |                  | 751.4          | 376.2            | A    | <b>910.5</b>  | 455.75          | 893.47         | 447.24           | 892.49         | 446.75           | 8  |
| 9  | 898.45        | 449.73          |                |                  | 880.44         | 440.72           | E    | <b>839.46</b> | 420.23          | 822.44         | 411.72           | 821.45         | 411.23           | 7  |
| 10 | <b>1026.5</b> | 513.76          | 1009.5         | 505.25           | 1008.5         | 504.75           | Q    | <b>710.42</b> | 355.71          | 693.39         | 347.2            |                |                  | 6  |
| 11 | 1123.6        | 562.29          | <b>1106.5</b>  | 553.77           | 1105.6         | 553.28           | P    | <b>582.36</b> | 291.68          | 565.33         | 283.17           |                |                  | 5  |
| 12 | <b>1220.6</b> | 610.81          | 1203.6         | 602.3            | 1202.6         | 601.81           | P    | 485.31        | 243.16          | 468.28         | 234.64           |                |                  | 4  |
| 13 | <b>1291.7</b> | 646.33          | 1274.6         | 637.82           | 1273.6         | 637.32           | A    | 388.26        | 194.63          | <b>371.23</b>  | 186.12           |                |                  | 3  |
| 14 | <b>1461.8</b> | 731.38          | 1444.7         | 722.87           | <b>1443.8</b>  | 722.38           | K    | 317.22        | 159.11          | 300.19         | 150.6            |                |                  | 2  |
| 15 |               |                 |                |                  |                |                  | K    | 147.11        | 74.06           | 130.09         | 65.55            |                |                  | 1  |

**Supplementary Fig. 5** Acetylated lysine residues of CoRest-C.

**a, b, c**, Bold italic red font represents the series contributing to the score. Bold red

indicates that the number of matches in the ion series is greater than that which would be expected by chance, indicating that the ion series is present. Non-bold red indicates that the number of matches in the ion series is no greater than that which would be expected by chance, such that the matches themselves may be by chance. \*, -NH<sub>3</sub> if fragment includes RKNQ; 0, -H<sub>2</sub>O if fragment includes STED (mass spectrum in each upper panel).

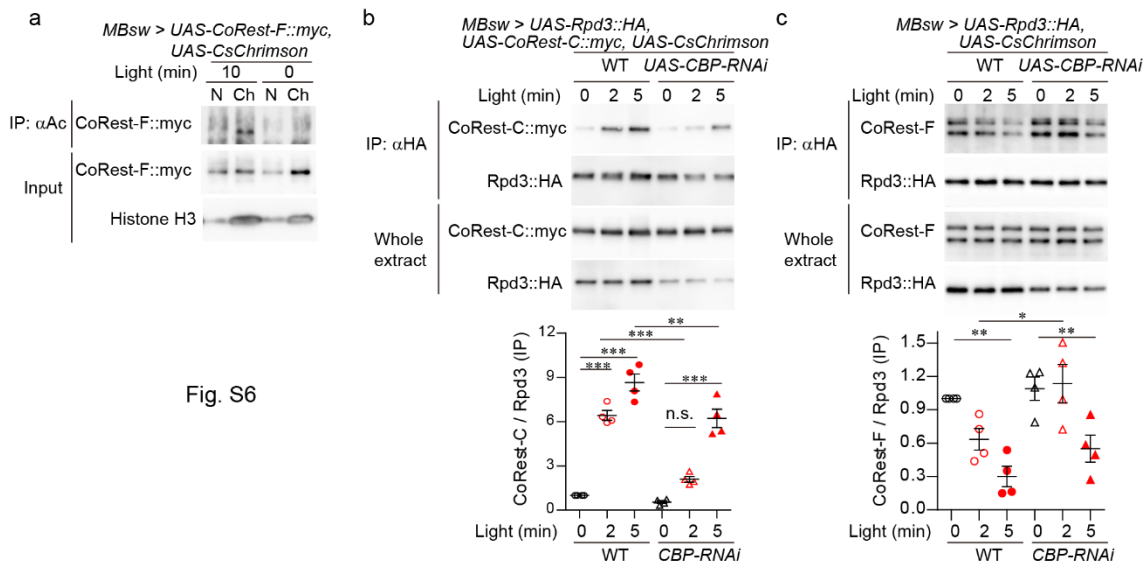

**Supplementary Fig. 6** Acetylation of CoRest-F after neural activation, and CBP-dependent complex change in Rpd3/CoRest.

**a**, CoRest-F was acetylated after optogenetic activation. The flies carrying the indicated transgenes were fed RU, and illuminated with red light. Nuclear extracts prepared from the heads were separated into the nuclear proteins (N) and the chromatin-associated proteins (Ch) by centrifugation in the presence of Magnesium ( $Mg^{2+}$ ). Each fraction was immunoprecipitated with the anti-Acetyl lysine antibody ( $\alpha$ Ac). The antibodies for the indicated epitope tags or for histone H3 were used in a western blot analysis. The images are representative of three experimental replicates.

**b, c**, Knockdown of *CBP* attenuated CoRest-C-binding to **(b)** and CoRest-F dissociation from Rpd3 **(c)** after optogenetic activation. The flies with the indicated transgenes were fed RU, and illuminated with red light, and the head extracts were immunoprecipitated with the anti-HA antibody. CoRest-F was detected with the anti-CoRest antibody, and other proteins were detected with the antibodies specific to the indicated epitope tags in a western blot analysis. One-way ANOVA (**b**,  $P < 0.0001$ ;  $n = 4$ . **c**,  $P = 0.0002$ ;  $n = 4$ .) followed by Tukey's multiple comparisons (two-sided) were performed.

Data are represented as a mean  $\pm$  s.e.m. n.s., not significant  $P > 0.05$ ; \*\*,  $P < 0.01$ ; \*\*\*  $P < 0.001$ , which is based on experimental replicates using different pooled samples, and the number is indicated as n above. Source data are provided as a Source Data file.

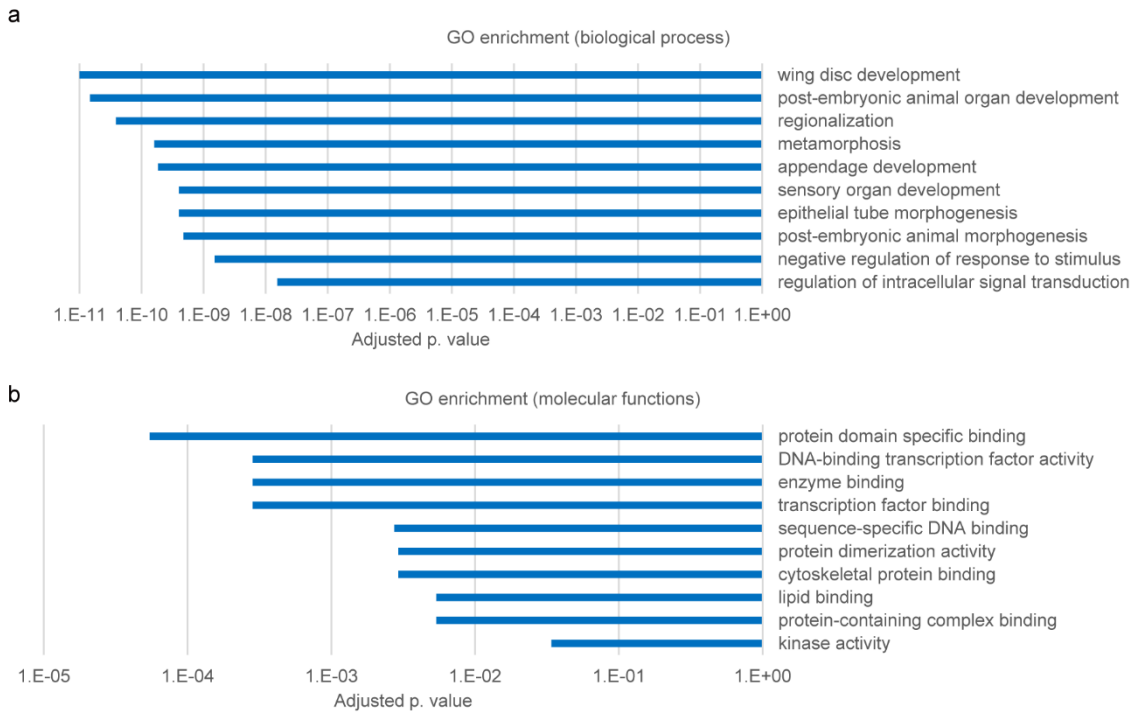

**Supplementary Fig. 7** The biological process-associated GO terms (**a**) and the molecular function-associated GO terms (**b**) significantly enriched in the 704 genes bound by CoRest-C, CBP and Rpd3.



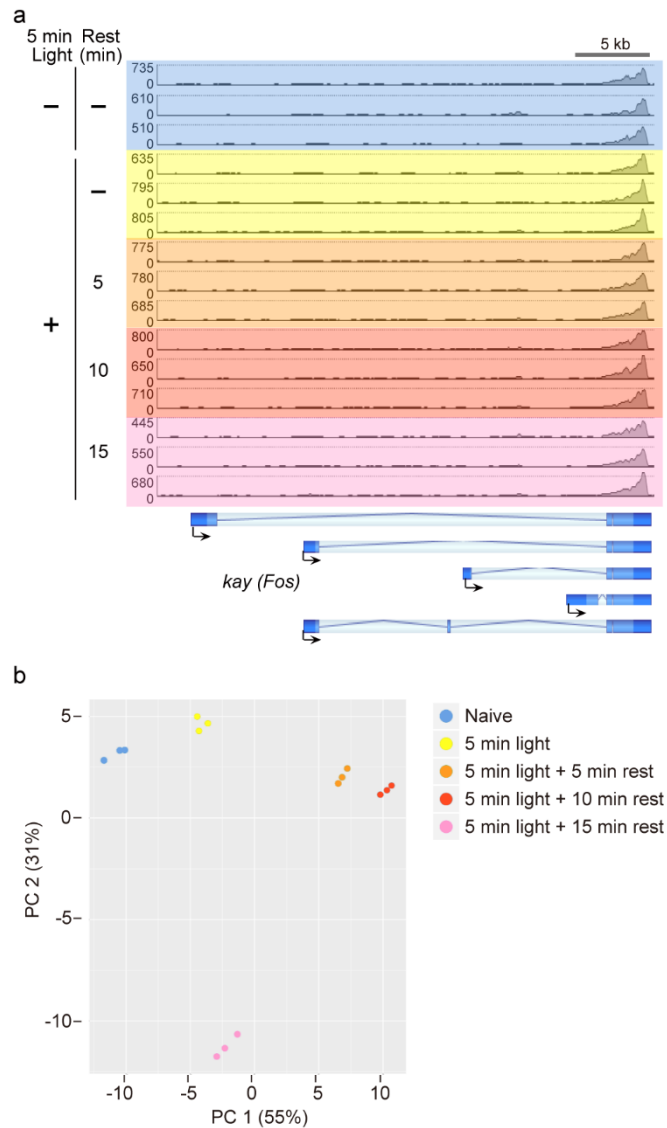

**Supplementary Fig. 8** Nuclear RNA-seq analysis from the MB nuclei.

**a**, RNA-seq signals at the region near *kay*. The flies expressing FLAG-KASH and CsChrimson by MBpLexA were illuminated with red light, followed by the rest for the indicated period of time. MB nuclei prepared as in Fig. 6 were subjected to RNA-seq analysis (n=3). The y axes show the number of mapped reads, and the upper limits were adjusted to the number of total reads in each sample. The statistical analysis via DESeq2 indicated that *kay* mRNA expression is significantly increased after 10 min of rest following optogenetic activation (q value = 0.000098, log<sub>2</sub> = 0.57).

**b, Principal component analysis (PCA) of mRNA expression data from the nuclear RNA-seq analysis.**

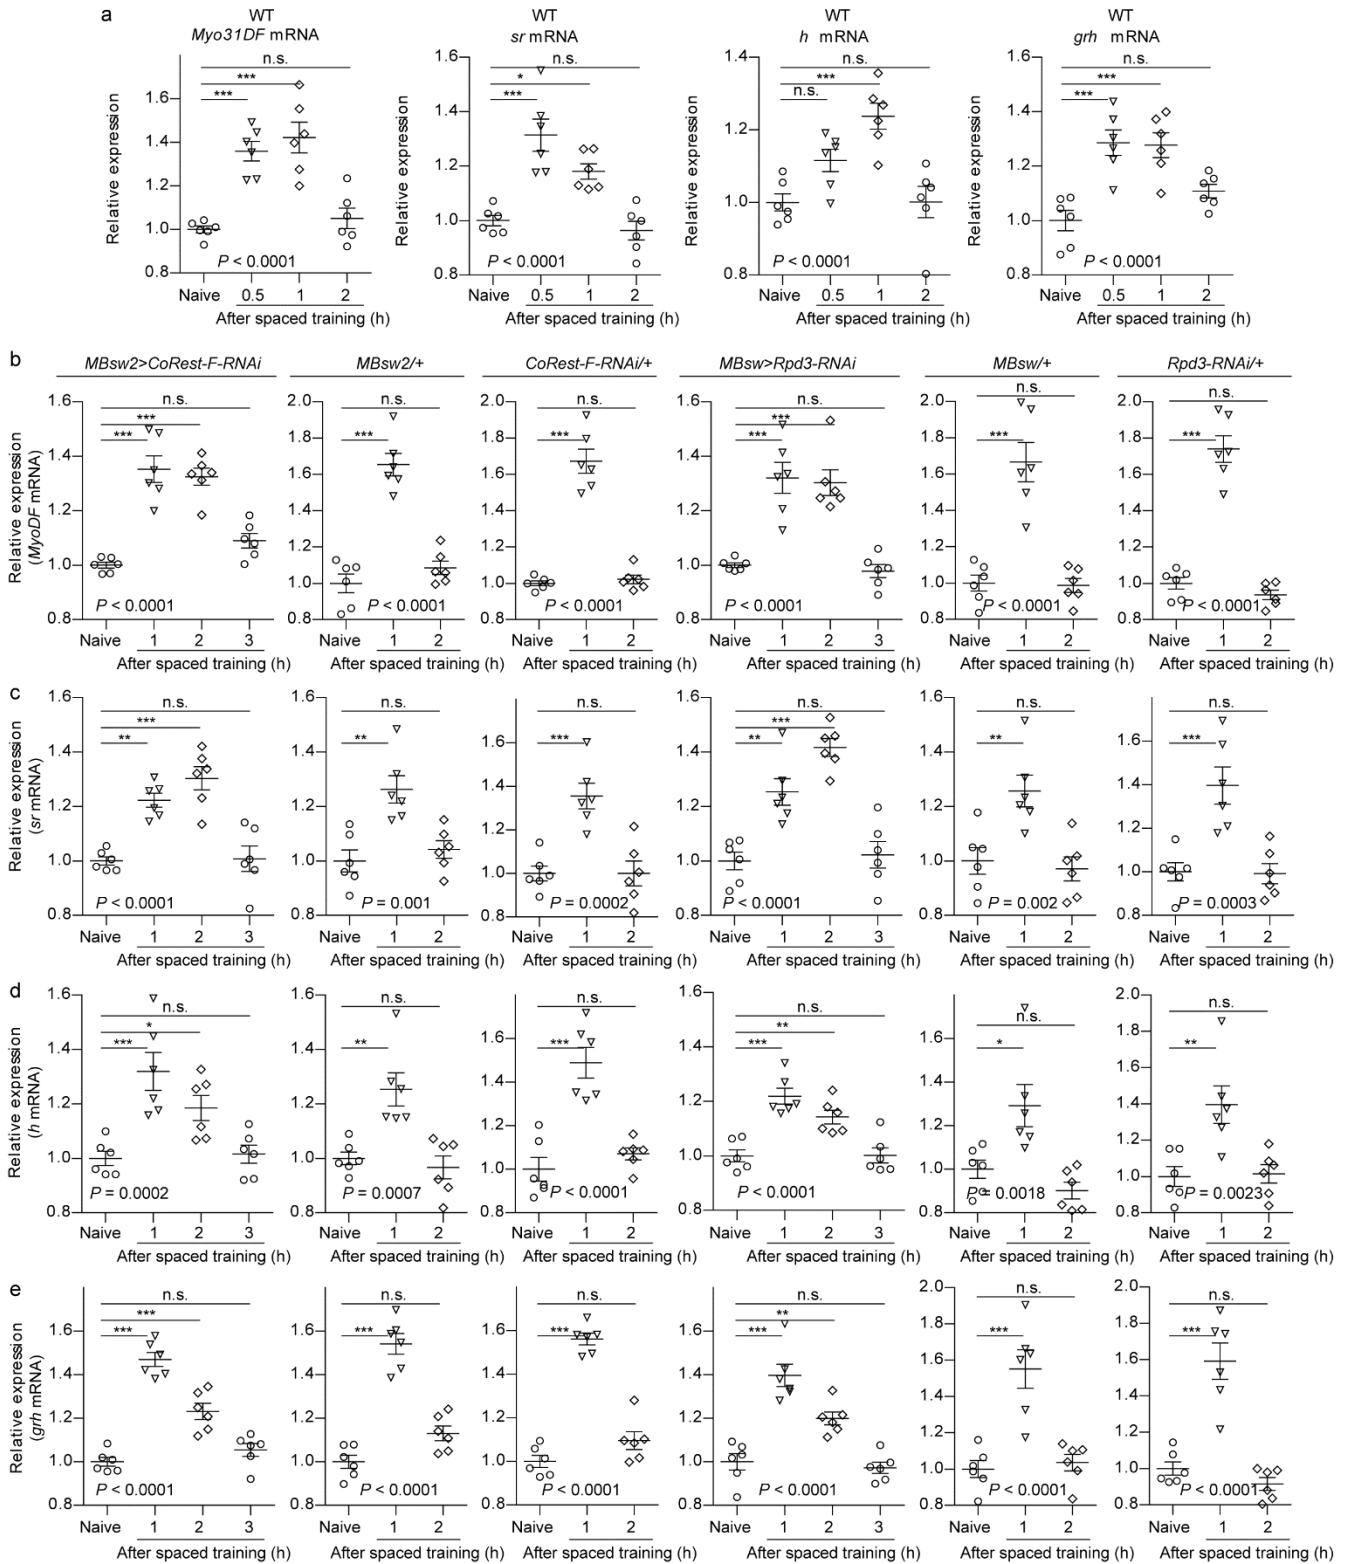

**Supplementary Fig. 9** Expression of the target genes of CoRest-C, Rpd3, and CBP.

**a**, Expression of the indicated genes in WT flies after spaced training.

**b-e**, Expression of *Myo31DF* (**b**), *sr* (**c**), *h* (**d**), and *grh* (**e**) was increased up to 2 hours after spaced training by knockdown of *CoRest-F* or *Rpd3*.

The flies carrying the indicated transgenes were fed RU, and subjected to spaced training.

The head RNAs were collected at the indicated time after spaced training, and analyzed via RT-qPCR. One-way ANOVA (*P* values are shown in each panel; *n* = 6 for all) followed by Tukey's multiple comparisons (two-sided) were performed.

Data are represented as mean  $\pm$  s.e.m. n.s., not significant  $P > 0.05$ ; \*,  $P < 0.05$ ; \*\*,  $P < 0.01$ ; \*\*\*,  $P < 0.001$ , which is based on experimental replicates using different pooled samples, and the number is indicated as *n* above. Source data are provided as a Source Data file.

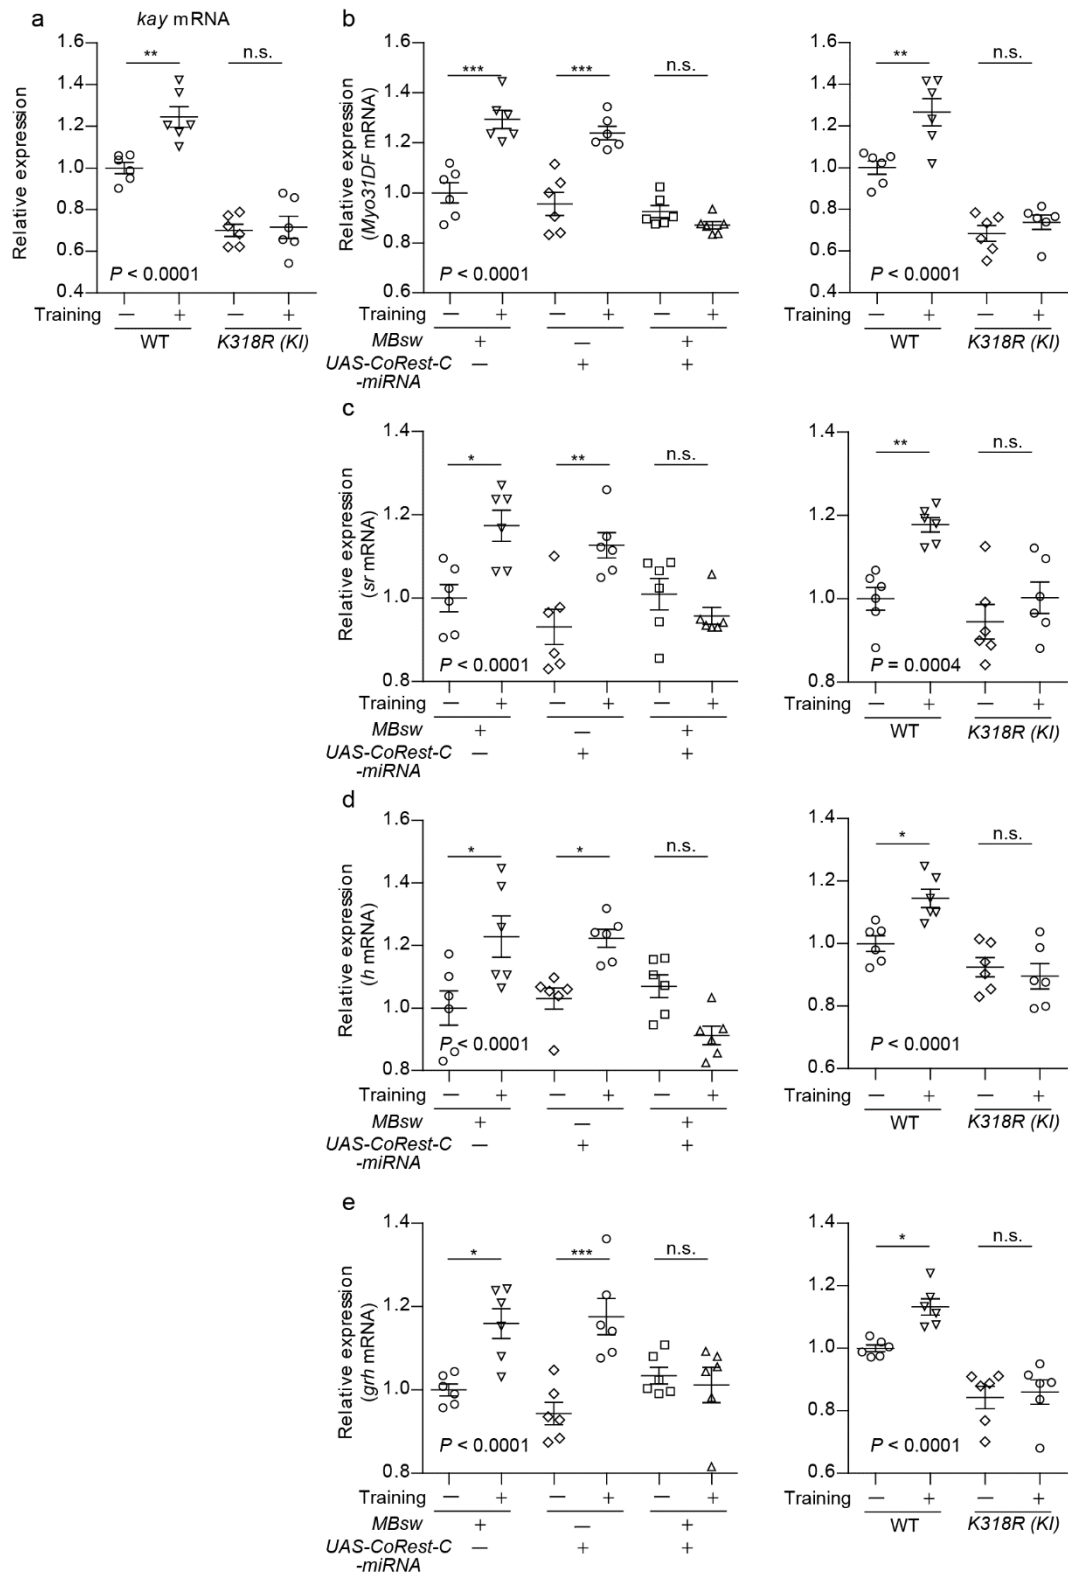

**Supplementary Fig. 10** K318 of CoRest-C is important for activity-dependent transcription.

**a**, The *K318R* mutation in *CoRest-C* impaired the expression of *kay* mRNA after spaced training. *K318R (KI)*, *CoRest-C-K318R* knock-in mutant.

**b-e**, Activity-dependent transcription requires *CoRest-C* and its *K318*. The flies carrying the indicated transgenes were fed normal food (right panels) or food containing RU (left panels), and subjected to spaced training. RNA extracted from the fly heads at 1-hour after spaced training was analyzed via RT-qPCR. One-way ANOVA (*P* values are shown in each panel. *n* = 6 for all) followed by Tukey's multiple comparisons (two-sided) were performed.

Data are represented as mean  $\pm$  s.e.m. n.s., not significant  $P > 0.05$ ; \*,  $P < 0.05$ ; \*\*,  $P < 0.01$ ; \*\*\*  $P < 0.001$ , which is based on experimental replicates using different pooled samples, and the number is indicated as *n* above. Source data are provided as a Source Data file.

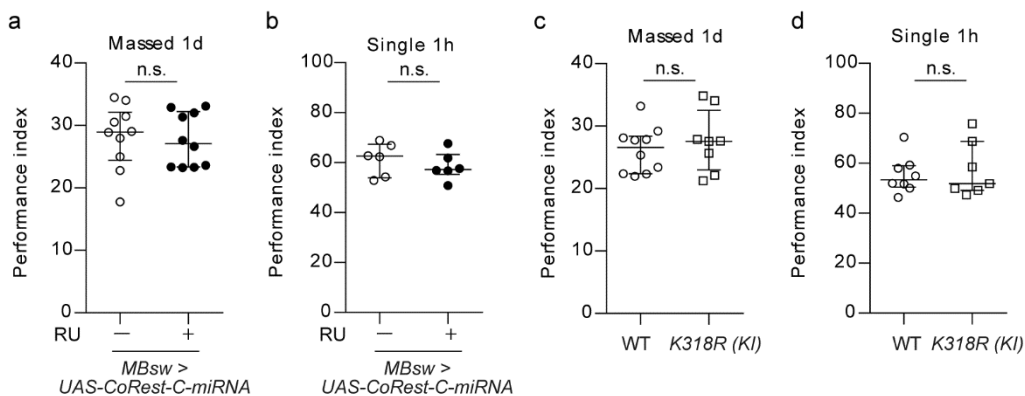

**Supplementary Fig. 11** *CoRest-C* is not involved in memory which does not require gene expression.

The knockdown of *CoRest-C* or the knock-in of the *K318R* mutation did not affect 1-day memory after mass training or 1-hour memory after a single training. The flies carrying the indicated transgenes were fed RU (**a**, **b**), or normal food (**c**, **d**), and subjected to mass

training (**a, c**) or a single training (**b, d**). **a**, Two-sided Mann-Whitney U-test,  $P = 0.7394$ ;  $n = 10$ . **b**, Two-sided Mann-Whitney U-test,  $P = 0.6991$ ;  $n = 6$ . **c**, Two-sided Mann-Whitney U-test,  $P = 0.8968$ ;  $n = 10$ , 8. **d**, Two-sided Mann-Whitney U-test,  $P = 0.9551$ ;  $n = 6$ . *K318R (KI)*, *CoRest-C-K318R* knock-in mutant.

Data are represented as mean  $\pm$  s.e.m. n.s., not significant  $P > 0.05$ , which is based on experimental replicates using different pooled samples, and the number is indicated as n above. Source data are provided as a Source Data file.

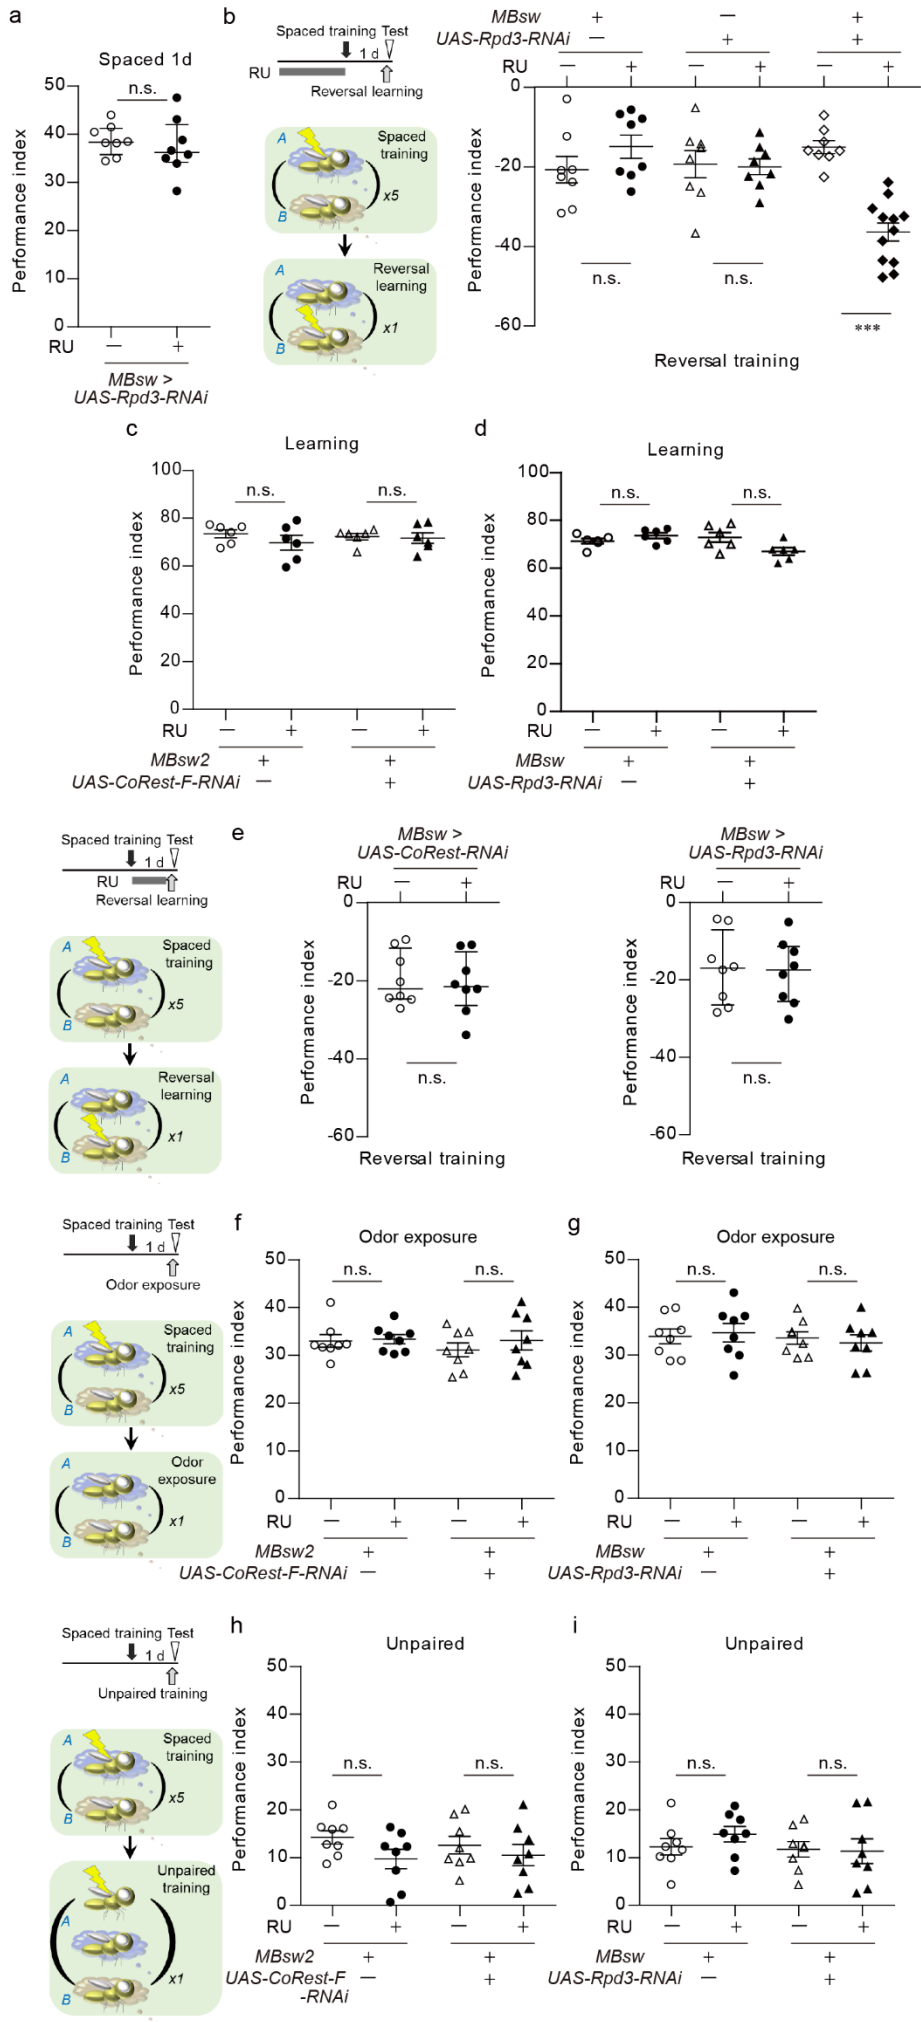

**Supplementary Fig. 12** CoRest-F/Rpd3 is required to limit behavioral flexibility.

**a**, Knockdown of *Rpd3* did not affect LTM formation. The flies with indicated transgenes were fed RU, and 1-day memory after spaced training was examined. Two-sided Mann-Whitney U-test,  $P = 0.5737$ ;  $n = 10$ .

**b**, The flexibility in memory updating was increased by *Rpd3* knockdown. The flies with indicated transgenes were fed RU, and subjected to spaced training. On the following day, the flies were subjected to reversal learning, in which the association of the odors and shock was alternated, and memory was measured immediately. A Kruskal-Wallis test ( $P = 0.0001$ ;  $n = 12$ ) followed by Dunn's multiple comparison test (two-sided) was performed.

**c, d**, Learning was not affected by the knockdown of *CoRest-F* or *Rpd3*. The flies with indicated transgenes were fed RU, and subjected to a single training. Memory was measured immediately. Kruskal-Wallis tests (**c**,  $P = 0.7900$ ;  $n = 6$ . **d**,  $P = 0.0586$ ;  $n = 6$ ) followed by Dunn's multiple comparison test (two-sided) were performed.

**e**, Acute knockdown of *CoRest-F* or *Rpd3* did not affect reversal learning. The flies with indicated transgenes were fed normal food, spaced-trained, and fed RU. On the following day, the flies were subjected to reversal learning. Memory was measured immediately. A Kruskal-Wallis test ( $P = 0.7984$ ;  $n = 8$ ) followed by Dunn's multiple comparison test (two-sided) was performed.

**f,g**, *CoRest-F* or *Rpd3* knockdown did not affect memory after exposure to odors. The flies with indicated transgenes were fed RU, and subjected to spaced training. On the following day, the conditioned and unconditioned odors were delivered to the flies, and memory was immediately measured. Kruskal-Wallis tests (**f**,  $P = 0.7649$ ;  $n = 8$ . **g**,  $P = 0.9132$ ;  $n = 8$ ) followed by Dunn's multiple comparison test (two-sided) were performed.



**h,i**, The knockdown of *CoRest-F* or *Rpd3* did not affect memory following unpaired training. The flies with indicated transgenes were fed RU, and subjected to spaced training. On the following day, unpaired training, in which electric shocks precede the exposure to the odors, was carried out, and memory was measured immediately. Kruskal-Wallis tests (**h**,  $P = 0.3511$ ;  $n = 8$ . **i**,  $P = 0.5069$ ;  $n = 8$ ) followed by Dunn's multiple comparison test (two-sided) were performed.

Data are represented as mean  $\pm$  s.e.m. n.s., not significant  $P > 0.05$ ; \*\*\*  $P < 0.001$ , which is based on experimental replicates using different pooled samples, and the number is indicated as n above. Source data are provided as a Source Data file.

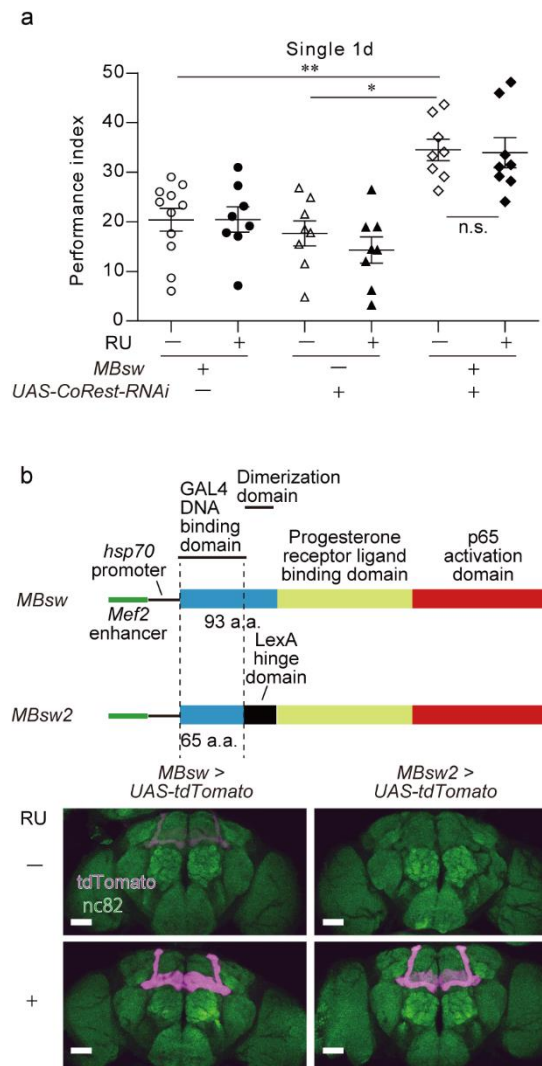

representative of experimental replicates ( $n = 3$  for all). (upper) Scale bar:  $50 \mu\text{m}$ . Data are represented as mean  $\pm$  s.e.m. n.s., not significant  $P > 0.05$ ; \*,  $P < 0.05$ ; \*\*,  $P < 0.01$ ; \*\*\*  $P < 0.001$ , which is based on experimental replicates using different pooled samples, and the number is indicated as  $n$  above. Source data are provided as a Source Data file.

**Supplementary Table 1** Proteins identified in the coimmunoprecipitates with Rpd3

Rpd3-immunocomplex prepared from flies expressing TRPA1 without (A) or with heat shock (B), or flies without TRPA1 with heat shock (C) was analyzed by the shotgun LC-MS/MS analysis. The peptide data was analyzed by Proteome discoverer 2.1., and the following scores were shown.

Sum PEP score, the sum of the scores of the individual peptides

Coverage, The percent coverage calculated by dividing the number of amino acids in all found peptides by the total number of amino acids in the entire protein sequence.

# Peptides, The number of distinct peptide sequences in the protein group

# PSMs, The total number of identified peptide sequences for the protein, including those redundantly identified.

# Unique Peptides, The number of peptide sequences unique to a protein group.

# AAs, the number of the amino acids in the entire protein sequence

Fold enrichment in sample B / sample A ((B)/(A)) and sample B / sample C ((B)/(C)) were shown.

| Accession        | Gene name  | Exp. q-value | Sum PEP Score | Coverage (%) | # Peptides | # PSMs | # Unique Peptides | # AAs | MW [kDa] | (A) Amount in the untreated sample (TRPA1) | (B) Amount in the hs-treated sample (TRPA1) | (C) Amount in the hs-treated sample (-TRPA1) | (B)/(A) | (B)/(C) | HDAC2 (Rpd3) complex |
|------------------|------------|--------------|---------------|--------------|------------|--------|-------------------|-------|----------|--------------------------------------------|---------------------------------------------|----------------------------------------------|---------|---------|----------------------|
| Q94517           | Rpd3       | 0            | 402.859       | 74.6641      | 49         | 421    | 49                | 521   | 58.3     | 967810289.2                                | 745019965.5                                 | 887410272.2                                  | 0.77    | 0.84    |                      |
| Q9VNF7           | MTA1-like  | 0            | 126.898       | 38.5071      | 34         | 130    | 1                 | 844   | 92.7     | 11284715.78                                | 6054035.875                                 | 3442014.781                                  | 0.54    | 1.76    | NuRD                 |
| Q59E34           | Mi-2       | 0            | 38.994        | 7.71558      | 11         | 20     | 11                | 1983  | 224.2    | 1989220.385                                | 4769408.366                                 | 3672924.804                                  | 2.40    | 1.30    | NuRD                 |
| A0A0B4K(MBD-like |            | 0            | 48.829        | 30.5882      | 10         | 41     | 10                | 340   | 36.3     | 18202976.06                                | 23521349.79                                 | 18370316.48                                  | 1.29    | 1.28    | NuRD                 |
| A0A0B4K7Sin3A    |            | 0            | 120.961       | 26.3795      | 34         | 100    | 34                | 2066  | 220.9    | 19567021.46                                | 17443854.59                                 | 14552056.95                                  | 0.89    | 1.20    | Sin3, CoRest         |
| C7LAG1           | CoRest     | 0            | 21.402        | 9.8301       | 8          | 20     | 8                 | 824   | 87.3     | 4820179.009                                | 6136161.932                                 | 4313027.471                                  | 1.27    | 1.42    | CoRest               |
| P10676           | ninaC      | 0            | 421.611       | 59.427       | 82         | 360    | 23                | 1501  | 174.2    | 85260150.47                                | 38164521.28                                 | 34265331.45                                  | 0.45    | 1.11    |                      |
| M9PCU0           | ninaC      | 0            | 318.408       | 57.4449      | 60         | 288    | 1                 | 1135  | 131.8    | 1520567.805                                | 739563.0938                                 | 884278.5313                                  | 0.49    | 0.84    |                      |
| P11147           | Hsc70-4    | 0            | 217.88        | 65.4378      | 49         | 190    | 43                | 651   | 71.1     | 80230831.7                                 | 103015412.9                                 | 101641828.9                                  | 1.28    | 1.01    |                      |
| Q9V8R9           | cora       | 0            | 135.904       | 32.8033      | 42         | 99     | 42                | 1698  | 184.1    | 9946304.135                                | 9056792.294                                 | 8963050.833                                  | 0.91    | 1.01    |                      |
| Q9BIR7           | Hsp70Bc    | 0            | 203.865       | 62.5585      | 40         | 136    | 5                 | 641   | 70.2     | 0                                          | 24171643.45                                 | 53485415.78                                  | N/A     | 0.45    |                      |
| P82910           | Hsp70Aa    | 0            | 209.523       | 62.4611      | 40         | 137    | 5                 | 642   | 70.1     | 0                                          | 18003939.45                                 | 51288879.56                                  | N/A     | 0.35    |                      |
| Q9W392           | CCT2       | 0            | 110.207       | 61.8692      | 26         | 74     | 26                | 535   | 58       | 20670075.76                                | 16664617.96                                 | 21455224.44                                  | 0.81    | 0.78    |                      |
| A0A0S0W Mhc      |            | 0            | 88.798        | 20.0815      | 26         | 47     | 26                | 1962  | 224.4    | 1351046.833                                | 4230360.313                                 | 1633411.262                                  | 3.13    | 2.59    |                      |
| P02518           | Hsp27      | 0            | 109.108       | 82.6291      | 23         | 83     | 23                | 213   | 23.6     | 0                                          | 244688175.3                                 | 196273797.2                                  | N/A     | 1.25    |                      |
| Q9VA91           | RpS7       | 0            | 89.228        | 80.4124      | 23         | 79     | 23                | 194   | 22.2     | 79773508.27                                | 72827556.15                                 | 70879388.29                                  | 0.91    | 1.03    |                      |
| M9NFP8           | CG43078    | 0            | 58.349        | 12.4409      | 22         | 43     | 22                | 2540  | 285.6    | 4463921.667                                | 2892988.398                                 | 2378149.865                                  | 0.65    | 1.22    |                      |
| Q24572           | Caf1       | 0            | 101.977       | 56.9767      | 21         | 85     | 4                 | 430   | 48.6     | 27824091.25                                | 34779195.22                                 | 35502966.94                                  | 1.25    | 0.98    |                      |
| E1JIL4           | Caf1-55    | 0            | 82.961        | 56.8765      | 19         | 70     | 2                 | 429   | 48.5     | 708632.3594                                | 0                                           | 1771399.625                                  | 0.00    | 0.00    |                      |
| Q9VNI3           | CG1218     | 0            | 58.95         | 42.539       | 19         | 59     | 19                | 449   | 51.1     | 21781616.33                                | 14883860.58                                 | 15351620.3                                   | 0.68    | 0.97    |                      |
| M9NE68           | Hsp23      | 0            | 117.564       | 95.1613      | 18         | 74     | 18                | 186   | 20.6     | 0                                          | 100647158.3                                 | 485136174.9                                  | N/A     | 0.21    |                      |
| P12613           | T-cp1      | 0            | 88.289        | 43.8061      | 17         | 61     | 17                | 557   | 59.5     | 15126242.08                                | 15644138.75                                 | 15003980.49                                  | 1.03    | 1.04    |                      |
| A8DYJ2           | hts        | 0            | 67.228        | 14.0207      | 17         | 56     | 17                | 1833  | 205.1    | 12432896.11                                | 9718663.862                                 | 21563679.72                                  | 0.78    | 0.45    |                      |
| O97125           | Hsp68      | 0            | 66.649        | 32.2835      | 17         | 46     | 10                | 635   | 69.7     | 0                                          | 3692766.79                                  | 11122117.99                                  | N/A     | 0.33    |                      |
| C1C553           | Mf         | 0            | 41.575        | 43.4505      | 16         | 45     | 2                 | 313   | 36.3     | 702728.4922                                | 0                                           | 730762.4531                                  | 0.00    | 0.00    |                      |
| P39018           | RpS19a     | 0            | 58.563        | 71.7949      | 16         | 61     | 16                | 156   | 17.3     | 22226729.11                                | 18042287.72                                 | 14454801.32                                  | 0.81    | 1.25    |                      |
| M9MSN3           | rdgA       | 0            | 54.059        | 20.4163      | 16         | 43     | 16                | 1009  | 112.9    | 12581186.46                                | 13348170.17                                 | 13567586.79                                  | 1.06    | 0.98    |                      |
| Q9VFC7           | Mf         | 0            | 49.163        | 47.9452      | 16         | 48     | 2                 | 365   | 41.6     | 3553938.875                                | 5091979.254                                 | 3323382.469                                  | 1.43    | 1.53    |                      |
| Q24560           | betaTub56D | 0            | 60.371        | 53.6913      | 15         | 49     | 15                | 447   | 50.1     | 13037949.71                                | 8508716.715                                 | 9979970.896                                  | 0.65    | 0.85    |                      |
| P02515           | Hsp22      | 0            | 58.027        | 75.8621      | 15         | 34     | 15                | 174   | 19.8     | 0                                          | 6048888.906                                 | 38364938.62                                  | N/A     | 0.16    |                      |

|          |             |   |        |         |    |    |    |      |       |             |             |             |        |      |
|----------|-------------|---|--------|---------|----|----|----|------|-------|-------------|-------------|-------------|--------|------|
| P15372   | Arr1        | 0 | 46.116 | 44.5055 | 15 | 36 | 15 | 364  | 40.7  | 4676472.893 | 4488139.813 | 4932498.294 | 0.96   | 0.91 |
| G3M3A2   | RpS3        | 0 | 34.337 | 56.9106 | 14 | 36 | 14 | 246  | 27.5  | 12572504.77 | 12982376.75 | 13077915.51 | 1.03   | 0.99 |
| Q9XZ09   | Sap130      | 0 | 42.158 | 20.1805 | 14 | 29 | 14 | 1219 | 123.5 | 4523420.254 | 5165159.242 | 2912575.516 | 1.14   | 1.77 |
| E1JIK9   | Mf          | 0 | 35.006 | 56.087  | 14 | 44 | 1  | 230  | 26.6  | 2400243.141 | 3353681.648 | 2917924.758 | 1.40   | 1.15 |
| Q9VSK5   | Gug         | 0 | 46.9   | 12.0907 | 14 | 29 | 14 | 1985 | 210.3 | 6374638.734 | 2651988.308 | 2770800.634 | 0.42   | 0.96 |
| P13060   | EF2         | 0 | 53.059 | 25      | 14 | 22 | 14 | 844  | 94.4  | 827154.8203 | 2222534.604 | 16317019.08 | 2.69   | 0.14 |
| X2JGG6   | Hsp26       | 0 | 94.115 | 79.8077 | 13 | 71 | 13 | 208  | 23    | 754062.8984 | 156869148.8 | 900475906.4 | 208.03 | 0.17 |
| F3YDH0   | Hsc70-3     | 0 | 56.428 | 22.561  | 13 | 45 | 8  | 656  | 72.2  | 2164753.762 | 2521602.792 | 2738083.487 | 1.16   | 0.92 |
| P08985   | His2Av      | 0 | 50.309 | 66.6667 | 11 | 39 | 9  | 141  | 15    | 64078072.95 | 71202002.85 | 54536393.7  | 1.11   | 1.31 |
| Q9V597   | RpL31       | 0 | 26.019 | 62.9032 | 11 | 27 | 11 | 124  | 14.5  | 17399235.43 | 14747982.44 | 16489288.38 | 0.85   | 0.89 |
| Q9VN91   | rtp         | 0 | 34.538 | 54.0404 | 11 | 34 | 11 | 198  | 22.7  | 36201033.13 | 9227083.968 | 16320103.88 | 0.25   | 0.57 |
| P55830   | RpS3A       | 0 | 33.701 | 45.1493 | 11 | 27 | 11 | 268  | 30.3  | 6544983.224 | 6077771.974 | 5562897.874 | 0.93   | 1.09 |
| P35381   | blw         | 0 | 26.856 | 21.7391 | 11 | 22 | 11 | 552  | 59.4  | 4528721.204 | 3560993.484 | 4830529.01  | 0.79   | 0.74 |
| P15357   | RpS27A      | 0 | 24.967 | 43.5897 | 10 | 27 | 10 | 156  | 17.9  | 54819419.09 | 50838096.86 | 53761889.78 | 0.93   | 0.95 |
| A0A0B4LH | Act87E      | 0 | 33.671 | 35.1064 | 10 | 25 | 10 | 376  | 41.8  | 18623235.87 | 26628517.96 | 20485690.85 | 1.43   | 1.30 |
| O62619   | PyK         | 0 | 30.898 | 24.7655 | 10 | 26 | 10 | 533  | 57.4  | 7818848.849 | 6869361.313 | 8255422.944 | 0.88   | 0.83 |
| A0A0B4K6 | RpS8        | 0 | 39.262 | 54.8077 | 10 | 29 | 10 | 208  | 23.7  | 5432762.323 | 6388417.701 | 6120547.909 | 1.18   | 1.04 |
| P06603   | alphaTub84B | 0 | 41.057 | 32      | 9  | 19 | 9  | 450  | 49.9  | 20878628.33 | 11743667.84 | 8618396.63  | 0.56   | 1.36 |
| A0A0B4LC | RpL11       | 0 | 28.559 | 51.6304 | 9  | 27 | 9  | 184  | 21.1  | 10762258.28 | 10357152.62 | 4302627.546 | 0.96   | 2.41 |
| X2JCX8   | RpS14b      | 0 | 26.238 | 59.6026 | 9  | 26 | 9  | 151  | 16.3  | 6758056.406 | 6230443.953 | 5507445.607 | 0.92   | 1.13 |
| O01666   | ATPsyngamma | 0 | 36.042 | 32.9966 | 9  | 20 | 9  | 297  | 32.9  | 6800136.982 | 6105486.701 | 6410791.607 | 0.90   | 0.95 |
| Q24400   | Mlp84B      | 0 | 19.841 | 30.9091 | 9  | 26 | 9  | 495  | 53.5  | 4841760.598 | 5871486.534 | 5498370.18  | 1.21   | 1.07 |
| P41042   | RpS4        | 0 | 25.228 | 40.9962 | 9  | 20 | 9  | 261  | 29.1  | 5136963.826 | 5123706.411 | 4820923.315 | 1.00   | 1.06 |
| P19109   | Rm62        | 0 | 27.167 | 15.9944 | 9  | 23 | 9  | 719  | 78.5  | 2420046.938 | 2505651.099 | 3005165.167 | 1.04   | 0.83 |
| P48588   | RpS25       | 0 | 19.066 | 50.4274 | 8  | 18 | 8  | 117  | 13.2  | 12209748.1  | 26579978.29 | 4844698.909 | 2.18   | 5.49 |
| C6TP87   | eEF1alpha1  | 0 | 26.184 | 25.27   | 8  | 23 | 8  | 463  | 50.3  | 15836738.99 | 15067204.71 | 17462189.26 | 0.95   | 0.86 |
| M9PF79   | simj        | 0 | 25.57  | 16.1153 | 8  | 23 | 8  | 937  | 98    | 8668242.982 | 10164848.41 | 7204113.102 | 1.17   | 1.41 |
| O02649   | Hsp60       | 0 | 20.62  | 23.5602 | 8  | 18 | 8  | 573  | 60.8  | 6243290.448 | 5576664.366 | 5291548.185 | 0.89   | 1.05 |
| A1Z7S3   | Rab32       | 0 | 27.528 | 19.242  | 8  | 15 | 8  | 686  | 74.7  | 3901962.927 | 4253446.401 | 5146282.361 | 1.09   | 0.83 |
| Q9VWH4   | I(1)G0156   | 0 | 26.84  | 29.443  | 8  | 25 | 8  | 377  | 40.8  | 4914854.568 | 3784066.652 | 3525324.628 | 0.77   | 1.07 |
| A1Z6Z7   | CG1620      | 0 | 51.854 | 21.6724 | 8  | 34 | 3  | 586  | 63.9  | 7134834.285 | 3756685.71  | 1910899.04  | 0.53   | 1.97 |
| Q9VLC5   | Aldh        | 0 | 20.252 | 21.5385 | 8  | 15 | 8  | 520  | 57    | 3345526.544 | 2276217.708 | 3016517.108 | 0.68   | 0.75 |
| E1JIJ5   | Vha55       | 0 | 17.956 | 22.449  | 8  | 11 | 8  | 490  | 54.5  | 1919443.926 | 1953904.344 | 2891898.887 | 1.02   | 0.68 |
| P84051   | His2A       | 0 | 51.41  | 60.4839 | 7  | 42 | 5  | 124  | 13.4  | 24631145.15 | 22062152.72 | 14533229.51 | 0.90   | 1.52 |
| Q9VZF9   | Cpr64Ad     | 0 | 30.279 | 57.4899 | 7  | 24 | 7  | 247  | 24.3  | 18357990.2  | 19296849.82 | 2623529.477 | 1.05   | 7.36 |
| P17704   | RpS17       | 0 | 25.817 | 62.5954 | 7  | 24 | 7  | 131  | 15.3  | 21613491.05 | 16117412.18 | 13596794.66 | 0.75   | 1.19 |
| P84040   | His4        | 0 | 17.967 | 43.6893 | 7  | 20 | 7  | 103  | 11.4  | 9536393.518 | 7485994.461 | 3020606.839 | 0.78   | 2.48 |
| E1JJM9   | RpS15Aa     | 0 | 18.115 | 61.5385 | 7  | 15 | 7  | 130  | 14.8  | 7735578.674 | 6806233.629 | 6438121.701 | 0.88   | 1.06 |
| P22700   | Ca-P60A     | 0 | 23.197 | 8.62745 | 7  | 15 | 7  | 1020 | 111.6 | 2043566.419 | 3152918.391 | 2853987.247 | 1.54   | 1.10 |
| Q9VV75   | UQCR-C2     | 0 | 23.142 | 31.1364 | 7  | 12 | 7  | 440  | 45.4  | 2376307.234 | 3118124.859 | 3507673.587 | 1.31   | 0.89 |
| Q9VAC1   | CG7920      | 0 | 18.628 | 24.3187 | 7  | 14 | 7  | 477  | 51.8  | 3243059.117 | 2948967.854 | 4006161.885 | 0.91   | 0.74 |
| Q8IMV6   | Saf-B       | 0 | 18.436 | 10.4526 | 7  | 9  | 7  | 928  | 102   | 1539987.761 | 2904389.438 | 3427030.059 | 1.89   | 0.85 |
| M9NFC0   | wupA        | 0 | 26.018 | 38.191  | 7  | 25 | 3  | 199  | 23.4  | 3140191.984 | 2748347.249 | 2503667.303 | 0.88   | 1.10 |
| P13607   | Atpalpha    | 0 | 13.94  | 8.16523 | 7  | 14 | 7  | 1041 | 115.5 | 2137956.919 | 1693054.919 | 1928072.578 | 0.79   | 0.88 |
| X2JB48   | sesB        | 0 | 18.497 | 20.0669 | 6  | 11 | 6  | 299  | 32.9  | 10493545.65 | 10347053.03 | 9637233.417 | 0.99   | 1.07 |

|                |              |   |        |         |   |    |   |      |       |             |             |             |      |      |
|----------------|--------------|---|--------|---------|---|----|---|------|-------|-------------|-------------|-------------|------|------|
| P02283         | His2B        | 0 | 24.069 | 39.8374 | 6 | 21 | 6 | 123  | 13.7  | 13006865.48 | 7377205.182 | 4379997.945 | 0.57 | 1.68 |
| P41094         | RpS18        | 0 | 13.54  | 40.7895 | 6 | 18 | 6 | 152  | 17.6  | 7243862.518 | 7351199.094 | 5224847.078 | 1.01 | 1.41 |
| Q7PLL3         | eIF4B        | 0 | 22.177 | 22.0044 | 6 | 15 | 6 | 459  | 52.2  | 2964695.258 | 5538432.047 | 5332050.192 | 1.87 | 1.04 |
| Q7Z020         | TrpA1        | 0 | 12.848 | 6.59983 | 6 | 6  | 6 | 1197 | 135.1 | 0           | 4395985.737 | 0           | N/A  | N/A  |
| P19107         | Arr2         | 0 | 22.455 | 22.9426 | 6 | 18 | 6 | 401  | 45    | 3709281.26  | 2492894.708 | 4016643.378 | 0.67 | 0.62 |
| C0HK95         | fau          | 0 | 13.835 | 51.145  | 6 | 17 | 5 | 131  | 14.4  | 855638.5547 | 2131678.592 | 2954522.411 | 2.49 | 0.72 |
| Q7JWQ7         | Swim         | 0 | 13.571 | 13.2251 | 6 | 15 | 6 | 431  | 48.8  | 1563960.477 | 2094422.937 | 2018896.406 | 1.34 | 1.04 |
| E1JGZ3         | CG1620       | 0 | 36.414 | 23.6324 | 6 | 25 | 1 | 457  | 50.4  | 0           | 743683.4043 | 1055506.438 | N/A  | 0.70 |
| M9PHR2         | up           | 0 | 14.43  | 13.8539 | 5 | 10 | 1 | 397  | 47.5  | 0           | 0           | 3001599.219 | N/A  | 0.00 |
| Q9VY42         | CG1461       | 0 | 11.526 | 13.9721 | 5 | 5  | 5 | 501  | 55.9  | 0           | 0           | 3069784.445 | N/A  | 0.00 |
| Q7JZW2         | RpS15        | 0 | 25.128 | 39.1892 | 5 | 17 | 5 | 148  | 17    | 12194926.13 | 16603063.26 | 16940452.95 | 1.36 | 0.98 |
| Q9W237         | RpS16        | 0 | 12.024 | 21.6216 | 5 | 15 | 5 | 148  | 16.8  | 16534770.15 | 14614283.96 | 12966200.76 | 0.88 | 1.13 |
| Q9VJ19         | RpL30        | 0 | 17.881 | 54.955  | 5 | 14 | 5 | 111  | 12.2  | 14661824.12 | 10723487.9  | 20496627.13 | 0.73 | 0.52 |
| P36188         | wupA         | 0 | 11.552 | 14.4981 | 5 | 16 | 1 | 269  | 30.1  | 14992814.91 | 10132858.84 | 0           | 0.68 | N/A  |
| P55828         | RpS20        | 0 | 21.75  | 42.5    | 5 | 24 | 5 | 120  | 13.5  | 9803916.521 | 8414065.447 | 7815502.292 | 0.86 | 1.08 |
| X2JDU0         | RpL9         | 0 | 12.477 | 31.5789 | 5 | 15 | 5 | 190  | 21.4  | 8024036.341 | 6509929.404 | 10077546.82 | 0.81 | 0.65 |
| Q8IM93         | CG32017-RB   | 0 | 14.727 | 11.2033 | 5 | 11 | 5 | 482  | 55.3  | 2201052.842 | 3385017.237 | 4632138.727 | 1.54 | 0.73 |
| P48159         | RpL23        | 0 | 22.192 | 40.7143 | 5 | 14 | 5 | 140  | 14.9  | 4085154.12  | 3069857.771 | 2281161.434 | 0.75 | 1.35 |
| Q9VNW6         | CG7470       | 0 | 15.824 | 8.76289 | 5 | 8  | 5 | 776  | 84    | 3747523.671 | 2570529.859 | 3582915.688 | 0.69 | 0.72 |
| M9NH07         | up           | 0 | 14.076 | 13.7056 | 5 | 12 | 1 | 394  | 47.2  | 2738812.031 | 2344494.473 | 2387289.555 | 0.86 | 0.98 |
| Q9W1H8         | Thiolase     | 0 | 8.971  | 10.2345 | 5 | 7  | 5 | 469  | 50.6  | 2402524.152 | 525236.5078 | 1467340.453 | 0.22 | 0.36 |
| Q9VKQ2         | CG17127      | 0 | 13.356 | 75.5102 | 4 | 15 | 4 | 98   | 10.8  | 22036769.91 | 36526385.44 | 8573459.857 | 1.66 | 4.26 |
| Q24154         | RpL29        | 0 | 26.845 | 30.2632 | 4 | 29 | 4 | 76   | 8.9   | 7902226.427 | 10100368.72 | 8879488.707 | 1.28 | 1.14 |
| O97102         | smt3         | 0 | 9.046  | 38.8889 | 4 | 8  | 4 | 90   | 10.1  | 2350814.84  | 7044246.072 | 4079971.225 | 3.00 | 1.73 |
| Q9W1B9         | RpL12        | 0 | 18.966 | 28.4848 | 4 | 13 | 4 | 165  | 17.7  | 6951536.099 | 6523870.324 | 6844341.568 | 0.94 | 0.95 |
| Q8SYJ2         | ND-MLRQ      | 0 | 9.324  | 55.4217 | 4 | 9  | 4 | 83   | 9.4   | 2395253.505 | 5375343.106 | 2920055.115 | 2.24 | 1.84 |
| Q9V3E7         | Ref1         | 0 | 14.344 | 19.5489 | 4 | 9  | 4 | 266  | 27.8  | 4534058.036 | 4851266.182 | 5712961.069 | 1.07 | 0.85 |
| A0A0B4LFRpS23  |              | 0 | 20.783 | 34.965  | 4 | 18 | 4 | 143  | 16    | 3864632.122 | 4475390.645 | 4078021.935 | 1.16 | 1.10 |
| B7YZQ3         | prom         | 0 | 12.139 | 4.45344 | 4 | 8  | 4 | 1235 | 138.2 | 3599092.238 | 4146991.622 | 5175061.547 | 1.15 | 0.80 |
| X2JKU5         | RpS5a        | 0 | 18.359 | 23.2456 | 4 | 9  | 4 | 228  | 25.4  | 3158764.031 | 3714609.176 | 1894144.531 | 1.18 | 1.96 |
| Q9W2J4         | BEST:GH09393 | 0 | 13.488 | 10.1504 | 4 | 11 | 4 | 532  | 60.1  | 4413477.404 | 3675928.94  | 4472382.352 | 0.83 | 0.82 |
| P55841         | RpL14        | 0 | 16.53  | 20.4819 | 4 | 12 | 4 | 166  | 19.2  | 3811486.005 | 3304869.203 | 2756451.617 | 0.87 | 1.20 |
| P41073         | Pep          | 0 | 14.125 | 8.51955 | 4 | 8  | 4 | 716  | 78    | 1023023.069 | 3156347.309 | 2671022.121 | 3.09 | 1.18 |
| P00334         | Adh          | 0 | 19.485 | 28.125  | 4 | 7  | 4 | 256  | 27.7  | 0           | 2968401.112 | 6418530.867 | N/A  | 0.46 |
| P08928         | Lam          | 0 | 14.963 | 9.6463  | 4 | 8  | 4 | 622  | 71.3  | 1637730.876 | 2783197.598 | 2241801.005 | 1.70 | 1.24 |
| Q9VZ22         | Lint-1       | 0 | 14.196 | 13.9535 | 4 | 14 | 4 | 602  | 67.9  | 2232850.809 | 2756971.492 | 3270213.543 | 1.23 | 0.84 |
| Q8SYR3         | Rsf1         | 0 | 10.751 | 23      | 4 | 9  | 4 | 200  | 21.4  | 1459546.891 | 2697379.949 | 2930132.914 | 1.85 | 0.92 |
| A0A0B4LECG8635 |              | 0 | 8.272  | 10.1485 | 4 | 6  | 4 | 404  | 45.3  | 2426435.313 | 2130799.818 | 2839174.414 | 0.88 | 0.75 |
| Q94920         | porin        | 0 | 11.521 | 18.7943 | 4 | 6  | 4 | 282  | 30.5  | 0           | 1710676.177 | 1575810.916 | N/A  | 1.09 |
| Q7KKI0         | CCT5         | 0 | 9.723  | 13.8376 | 4 | 8  | 4 | 542  | 59.2  | 0           | 1625098.684 | 1992681.978 | N/A  | 0.82 |
| A0A0B4KCHtrA2  |              | 0 | 13.254 | 11.8483 | 4 | 6  | 4 | 422  | 46    | 2538365.438 | 1411625.047 | 1578824     | 0.56 | 0.89 |
| Q9VWP5         | htk          | 0 | 7.906  | 1.85036 | 3 | 4  | 3 | 2486 | 259.3 | 738610.7715 | 0           | 407652.9102 | 0.00 | 0.00 |
| Q02748         | eIF-4a       | 0 | 5.892  | 11.9107 | 3 | 3  | 3 | 403  | 45.8  | 0           | 0           | 2017314.992 | N/A  | 0.00 |
| B5X0J4         | ple          | 0 | 8.03   | 6.73575 | 3 | 3  | 3 | 579  | 66    | 0           | 0           | 1851978.927 | N/A  | 0.00 |
| O97064         | Ccp84Ag      | 0 | 8.053  | 27.2251 | 3 | 7  | 3 | 191  | 19.4  | 7795490.151 | 8584183.035 | 0           | 1.10 | N/A  |

|          |            |       |        |         |   |   |   |      |       |             |             |             |      |      |
|----------|------------|-------|--------|---------|---|---|---|------|-------|-------------|-------------|-------------|------|------|
| Q9VSU3   | CG13315    | 0     | 8.966  | 40.5797 | 3 | 8 | 3 | 69   | 8     | 5699590.957 | 5602532.953 | 576649.8867 | 0.98 | 9.72 |
| X2JC80   | sta        | 0     | 7.918  | 17.7778 | 3 | 8 | 3 | 270  | 30.2  | 3013616.427 | 4552827.219 | 3848667.898 | 1.51 | 1.18 |
| Q9VYI2   | Brms1      | 0     | 5.614  | 12.3552 | 3 | 5 | 3 | 259  | 29.5  | 5295724.92  | 3978323.623 | 2490846     | 0.75 | 1.60 |
| Q9VFJ0   | Cyp313a1   | 0     | 6.533  | 6.70732 | 3 | 4 | 3 | 492  | 56.5  | 0           | 3769811.688 | 5489749.146 | N/A  | 0.69 |
| M9PB84   | RpS2       | 0     | 4.812  | 12.3596 | 3 | 7 | 3 | 267  | 28.9  | 1941077.104 | 3441275.525 | 3976832.699 | 1.77 | 0.87 |
| Q9VVU2   | RpL26      | 0     | 6.949  | 12.0805 | 3 | 5 | 3 | 149  | 17.3  | 1673030.096 | 3431379.32  | 4255315.457 | 2.05 | 0.81 |
| Q9V426   | vig        | 0     | 12.097 | 9.18367 | 3 | 7 | 3 | 490  | 52.7  | 2148857.422 | 2868650.062 | 2866470.576 | 1.33 | 1.00 |
| P54385   | Gdh        | 0     | 7.224  | 6.9395  | 3 | 5 | 3 | 562  | 62.5  | 1742044.065 | 2551410.559 | 0           | 1.46 | N/A  |
| A0A0B4KE | 14-3-3zeta | 0     | 12.049 | 14.5161 | 3 | 7 | 3 | 248  | 28.2  | 1766273.725 | 2410791.77  | 1989242.294 | 1.36 | 1.21 |
| L0MQ04   | ATPsynbeta | 0     | 8.218  | 10.1761 | 3 | 5 | 3 | 511  | 54.6  | 1898347.766 | 2263113.406 | 2190149.401 | 1.19 | 1.03 |
| P02255   | His1       | 0     | 6.505  | 12.8906 | 3 | 6 | 3 | 256  | 26.3  | 1731910.916 | 2227304.805 | 1900979.547 | 1.29 | 1.17 |
| Q9VSW4   | mRRF1      | 0     | 8.339  | 15.748  | 3 | 7 | 3 | 254  | 28.5  | 2912545.589 | 2146791.992 | 2676735.945 | 0.74 | 0.80 |
| M9PEA2   | CDK2AP1    | 0     | 14.023 | 16.9492 | 3 | 9 | 3 | 295  | 30.7  | 1660513.79  | 2058197.114 | 2157309.114 | 1.24 | 0.95 |
| X2JDA5   | Gs2        | 0     | 7.666  | 12.0643 | 3 | 7 | 3 | 373  | 41.7  | 2433561.984 | 1650556.363 | 5209830.156 | 0.68 | 0.32 |
| C0HK94   | CG45078    | 0     | 6.281  | 26.9939 | 3 | 5 | 2 | 163  | 18.8  | 498225.9375 | 1417738.742 | 0           | 2.85 | N/A  |
| Q9V397   | Mtpalpha   | 0     | 7.283  | 7.02427 | 3 | 4 | 3 | 783  | 84    | 0           | 1309696.375 | 1562746.063 | N/A  | 0.84 |
| P35415   | Prm        | 0     | 9.5    | 5.46075 | 3 | 4 | 3 | 879  | 102.3 | 0           | 1121654.863 | 638579.8613 | N/A  | 1.76 |
| Q9W4L1   | mRpL33     | 0     | 8.233  | 60.9375 | 3 | 5 | 3 | 64   | 7.7   | 2308968.216 | 964333.8164 | 713888.5625 | 0.42 | 1.35 |
| P13217   | norpA      | 0     | 8.393  | 3.10502 | 3 | 6 | 3 | 1095 | 124.8 | 3471964.063 | 726763.3112 | 920395.5762 | 0.21 | 0.79 |
| Q9VM14   | muc        | 0     | 3.97   | 6.64063 | 3 | 3 | 3 | 512  | 54.2  | 0           | 712518.959  | 270563.0977 | N/A  | 2.63 |
| P22979   | Hsp67Bc    | 0     | 7.171  | 27.1357 | 3 | 4 | 3 | 199  | 22.2  | 0           | 241342.2656 | 2305721.788 | N/A  | 0.10 |
| Q9VWG2   | CG14220-RA | 0.013 | 2.311  | 6.72783 | 2 | 2 | 2 | 327  | 38.3  | 847940.0742 | 0           | 3612195.492 | 0.00 | 0.00 |
| P55935   | RpS9       | 0     | 3.237  | 10.7692 | 2 | 2 | 2 | 195  | 22.6  | 1256635.926 | 0           | 0           | 0.00 | N/A  |
| M9PHM6   | RpL18      | 0     | 5.502  | 14.3617 | 2 | 3 | 2 | 188  | 21.7  | 1716453.449 | 0           | 0           | 0.00 | N/A  |
| A0A0B4KE | RpL38      | 0     | 4.89   | 17.1429 | 2 | 2 | 2 | 70   | 8.2   | 12147231.69 | 0           | 3930533.32  | 0.00 | 0.00 |
| A4V3G1   | Ald        | 0.013 | 2.843  | 6.33609 | 2 | 3 | 2 | 363  | 39.5  | 0           | 0           | 652045.3809 | N/A  | 0.00 |
| Q9W503   | CG3091     | 0     | 4.944  | 6.93069 | 2 | 3 | 2 | 303  | 34.6  | 0           | 0           | 2686329.219 | N/A  | 0.00 |
| P17276   | Hn         | 0     | 6.705  | 7.52212 | 2 | 2 | 2 | 452  | 51.6  | 0           | 0           | 1887633.844 | N/A  | 0.00 |
| P02828   | Hsp83      | 0     | 3.023  | 4.1841  | 2 | 3 | 2 | 717  | 81.8  | 0           | 0           | 1611730.67  | N/A  | 0.00 |
| A0A0B4K  | Stat92E    | 0     | 7.219  | 4.64548 | 2 | 3 | 2 | 818  | 92.5  | 0           | 0           | 1429757.047 | N/A  | 0.00 |
| A0A0B4K  | bel        | 0     | 7.139  | 3.99501 | 2 | 2 | 2 | 801  | 85.4  | 0           | 0           | 4561418.617 | N/A  | 0.00 |
| M9NFH8   | CG9674     | 0     | 5.958  | 1.2766  | 2 | 2 | 2 | 2115 | 232.1 | 0           | 0           | 1917462.746 | N/A  | 0.00 |
| Q8SWS3   | CG13049    | 0     | 8.187  | 28.7293 | 2 | 6 | 2 | 181  | 17.3  | 11957017.11 | 14282236.19 | 1993795.719 | 1.19 | 7.16 |
| Q9VVZ4   | CG14095    | 0     | 11.267 | 30.2469 | 2 | 8 | 2 | 162  | 15.9  | 13941723.83 | 13375445.48 | 1785546.563 | 0.96 | 7.49 |
| Q9W1Q4   | CG9812     | 0     | 17.219 | 18.6747 | 2 | 9 | 2 | 332  | 34.5  | 9110602.336 | 12980805.36 | 2381473.617 | 1.42 | 5.45 |
| Q9VV18   | CG13047    | 0     | 4.416  | 22.3529 | 2 | 6 | 2 | 170  | 16.6  | 10485386.32 | 12066830.45 | 0           | 1.15 | N/A  |
| E2QCP0   | His3.3A    | 0     | 10.353 | 28.6765 | 2 | 5 | 2 | 136  | 15.3  | 6487947.938 | 7547454.625 | 4247874.797 | 1.16 | 1.78 |
| Q9VUZ0   | SsRbeta    | 0     | 10.317 | 19.4737 | 2 | 6 | 2 | 190  | 21.2  | 5251691.293 | 5401821.457 | 5788629.793 | 1.03 | 0.93 |
| Q9W141   | CG4692     | 0     | 6.544  | 23.3645 | 2 | 7 | 2 | 107  | 12.5  | 2660625.5   | 4303989.414 | 4944584.76  | 1.62 | 0.87 |
| Q9VVH5   | UQCR-Q     | 0     | 4.242  | 33.7079 | 2 | 4 | 2 | 89   | 10.1  | 2564173.867 | 4274689.313 | 5030356.066 | 1.67 | 0.85 |
| Q9V3P0   | Jafrac1    | 0     | 6.283  | 13.4021 | 2 | 4 | 2 | 194  | 21.7  | 3307798.945 | 3535806.125 | 3255330.82  | 1.07 | 1.09 |
| Q9W229   | RpS24      | 0     | 4.761  | 14.5038 | 2 | 5 | 2 | 131  | 15    | 3723454.59  | 3389926.966 | 5383087.531 | 0.91 | 0.63 |
| Q9W078   | Cpr62Bb    | 0     | 5.209  | 14.9485 | 2 | 5 | 2 | 194  | 21.2  | 1995377.773 | 2974720.93  | 0           | 1.49 | N/A  |
| Q9W2U8   | Neb-cGP    | 0     | 3.356  | 62.5    | 2 | 6 | 2 | 48   | 5.1   | 3293587.684 | 2933632.219 | 2424710.184 | 0.89 | 1.21 |
| M9MRF2   | RpL37A     | 0     | 12.883 | 27.1739 | 2 | 9 | 2 | 92   | 10.3  | 2659197.667 | 2931897.1   | 1989811.006 | 1.10 | 1.47 |

|              |              |       |        |         |   |    |   |      |       |             |             |             |      |       |
|--------------|--------------|-------|--------|---------|---|----|---|------|-------|-------------|-------------|-------------|------|-------|
| Q4V619       | mIF3         | 0     | 9.288  | 15.9483 | 2 | 3  | 2 | 232  | 25.8  | 1567461.992 | 2850617.328 | 2315311.094 | 1.82 | 1.23  |
| Q53ZT0       | DnaJ-1       | 0     | 4.46   | 15.8683 | 2 | 4  | 2 | 334  | 37    | 0           | 2574897.219 | 1981386.49  | N/A  | 1.30  |
| Q9W4N8       | Vap33        | 0     | 5.375  | 11.8959 | 2 | 5  | 2 | 269  | 29.5  | 0           | 2438202.73  | 2652380.641 | N/A  | 0.92  |
| P07487       | Gapdh2       | 0     | 5.7    | 8.73494 | 2 | 4  | 2 | 332  | 35.3  | 3934054.855 | 2151154.543 | 0           | 0.55 | N/A   |
| Q9VZG1       | Cpr64Ab      | 0     | 3.614  | 20.8333 | 2 | 2  | 2 | 120  | 12.5  | 4013172.695 | 2068178.203 | 0           | 0.52 | N/A   |
| Q500Y7       | UQCR-6.4     | 0     | 4.037  | 38.5965 | 2 | 5  | 2 | 57   | 6.3   | 3554335.672 | 2064087.641 | 433894.9688 | 0.58 | 4.76  |
| Q9VBU9       | RpS27        | 0     | 3.731  | 14.2857 | 2 | 5  | 2 | 84   | 9.4   | 2333544.418 | 1854069.578 | 2893267.672 | 0.79 | 0.64  |
| Q94523       | SdhA         | 0     | 9.235  | 3.78215 | 2 | 5  | 2 | 661  | 72.3  | 1797031.5   | 1824818.453 | 1896514.469 | 1.02 | 0.96  |
| Q95RB2       | Cpr49Ae      | 0     | 5.371  | 10.4478 | 2 | 4  | 2 | 134  | 14.3  | 1261056.301 | 1798706.602 | 3645149.063 | 1.43 | 0.49  |
| A0A0B4KEsbb  |              | 0     | 3.509  | 1.33047 | 2 | 4  | 2 | 2330 | 233.1 | 341227.0781 | 1746911.805 | 0           | 5.12 | N/A   |
| Q9W3L4       | CG2233       | 0     | 4.076  | 9.90338 | 2 | 3  | 2 | 414  | 46.5  | 0           | 1741178.781 | 0           | N/A  | N/A   |
| X2JEX8       | Yp3          | 0     | 6.643  | 7.38095 | 2 | 2  | 2 | 420  | 46.1  | 1659393.742 | 1646337.063 | 0           | 0.99 | N/A   |
| M9PF20       | tral         | 0     | 8.916  | 5.93607 | 2 | 4  | 2 | 657  | 69.8  | 0           | 1591842.934 | 1451189.684 | N/A  | 1.10  |
| Q9VQ35       | mRpL48       | 0     | 4.067  | 16.0221 | 2 | 3  | 2 | 181  | 20.9  | 2104504.922 | 1573954.742 | 0           | 0.75 | N/A   |
| P50887       | RpL22        | 0     | 7.18   | 8.02676 | 2 | 8  | 2 | 299  | 30.6  | 1940864.773 | 1521053.672 | 1279827.477 | 0.78 | 1.19  |
| Q9V3Z9       | BG:DS00180.3 | 0     | 4.42   | 11.5523 | 2 | 5  | 2 | 277  | 29.7  | 1334467.105 | 1499889.434 | 0           | 1.12 | N/A   |
| Q9W3Y0       | CG3224       | 0     | 6.502  | 20.9877 | 2 | 7  | 2 | 162  | 18.9  | 1480837.559 | 1461780.557 | 1912675.385 | 0.99 | 0.76  |
| E1JGL8       | CG30122      | 0     | 14.673 | 2.67296 | 2 | 9  | 2 | 1272 | 140.5 | 1548688.844 | 1456514.355 | 1683468.703 | 0.94 | 0.87  |
| A8DYI6       | Phb2         | 0     | 5.637  | 8.28402 | 2 | 2  | 2 | 338  | 37.3  | 0           | 1391405.289 | 1096438.188 | N/A  | 1.27  |
| Q86B94       | mfas         | 0     | 3.663  | 2.87293 | 2 | 4  | 2 | 905  | 100.2 | 958484.4688 | 1269863.363 | 0           | 1.32 | N/A   |
| Q9I7K0       | Jupiter      | 0     | 4.403  | 12.0192 | 2 | 3  | 2 | 208  | 22.3  | 601285.75   | 1218124.715 | 0           | 2.03 | N/A   |
| P25007       | Cyp1         | 0     | 7.228  | 10.5727 | 2 | 4  | 2 | 227  | 24.7  | 0           | 1168355.703 | 1956659.96  | N/A  | 0.60  |
| A0A0B4Kfchp  |              | 0     | 13.145 | 3.36323 | 2 | 11 | 2 | 1338 | 154.6 | 2112477.813 | 1124817.094 | 2585811.141 | 0.53 | 0.43  |
| A0A0B4KFLamC |              | 0     | 5.8    | 5.3125  | 2 | 2  | 2 | 640  | 72.1  | 0           | 1123421.203 | 0           | N/A  | N/A   |
| O62530       | AP-2mu       | 0     | 3.294  | 3.89016 | 2 | 4  | 2 | 437  | 49.8  | 0           | 1120362.859 | 1040133.809 | N/A  | 1.08  |
| P46461       | comt         | 0     | 4.361  | 3.75839 | 2 | 3  | 2 | 745  | 82.5  | 1059059.141 | 1109128.922 | 0           | 1.05 | N/A   |
| P54367       | Cklalpha     | 0     | 3.551  | 7.12166 | 2 | 3  | 2 | 337  | 39.5  | 1109159.934 | 1045957.297 | 1166196.441 | 0.94 | 0.90  |
| M9MSL3       | Hsc70Cb      | 0     | 4.074  | 2.27273 | 2 | 3  | 2 | 836  | 91.8  | 2103046.676 | 1034598.742 | 853461.5391 | 0.49 | 1.21  |
| Q8IGY1       | Tm1          | 0     | 7.634  | 3.79747 | 2 | 4  | 2 | 711  | 80    | 637977.0156 | 1029770.578 | 1026158.195 | 1.61 | 1.00  |
| O76521       | Kap-alpha1   | 0     | 2.934  | 3.8674  | 2 | 3  | 2 | 543  | 60    | 0           | 983436.1172 | 1107750.668 | N/A  | 0.89  |
| Q9VB52       | I(3)mbt      | 0     | 4.359  | 1.96344 | 2 | 4  | 2 | 1477 | 162.9 | 896680.1523 | 939410.7578 | 0           | 1.05 | N/A   |
| P21521       | Syt1         | 0     | 4.33   | 5.06329 | 2 | 5  | 2 | 474  | 53.2  | 1347668.57  | 936913.4609 | 1295979.816 | 0.70 | 0.72  |
| O02195       | Trip1        | 0     | 5.574  | 7.36196 | 2 | 3  | 2 | 326  | 36.1  | 0           | 795631.707  | 1642018.867 | N/A  | 0.48  |
| M9PHL7       | Flo2         | 0     | 4.551  | 5.35714 | 2 | 2  | 2 | 448  | 49.5  | 0           | 738828.3535 | 0           | N/A  | N/A   |
| Q8IQ80       | pst          | 0     | 2.903  | 3.39463 | 2 | 3  | 2 | 707  | 77.4  | 0           | 689472.8281 | 2361700.175 | N/A  | 0.29  |
| P48605       | Cctgamma     | 0     | 5.922  | 4.22794 | 2 | 4  | 2 | 544  | 59.4  | 1736734.031 | 649559.25   | 650800.8594 | 0.37 | 1.00  |
| A8JNK1       | ens          | 0     | 5.967  | 1.85334 | 2 | 5  | 2 | 1241 | 135.7 | 1184188.758 | 580810.3967 | 23231.00781 | 0.49 | 25.00 |
| B7Z001       | FASN1        | 0     | 5.437  | 1.06299 | 2 | 2  | 2 | 2540 | 277.8 | 498967.0625 | 557598.8906 | 0           | 1.12 | N/A   |
| Q9VI10       | SmD2         | 0     | 5.137  | 15.9664 | 2 | 3  | 2 | 119  | 13.5  | 835071.4512 | 509891.9746 | 0           | 0.61 | N/A   |
| Q0E8E8       | Mpcp         | 0.018 | 1.227  | 2.52809 | 1 | 1  | 1 | 356  | 38.8  | 252260.6758 | 0           | 0           | 0.00 | N/A   |
| Q9VND7       | CG2931       | 0.029 | 1.041  | 3.97351 | 1 | 1  | 1 | 302  | 33.6  | 338490.5625 | 0           | 0           | 0.00 | N/A   |
| Q9W3E2       | PIP82        | 0.013 | 2.284  | 1.33891 | 1 | 1  | 1 | 1195 | 132.3 | 471306.7539 | 0           | 0           | 0.00 | N/A   |
| Q0E8Y1       | PIP5K59B     | 0.013 | 1.99   | 2.04866 | 1 | 1  | 1 | 781  | 86    | 497778.1875 | 0           | 0           | 0.00 | N/A   |
| Q9V496       | Rfabg        | 0.013 | 2.023  | 0.3581  | 1 | 2  | 1 | 3351 | 372.4 | 569208.2656 | 0           | 675307.4609 | 0.00 | 0.00  |
| Q7JXC4       | P32          | 0.027 | 1.055  | 3.42205 | 1 | 1  | 1 | 263  | 29    | 614611.7188 | 0           | 0           | 0.00 | N/A   |



|        |               |       |       |         |   |   |   |      |       |             |   |             |      |      |
|--------|---------------|-------|-------|---------|---|---|---|------|-------|-------------|---|-------------|------|------|
| A1Z784 | ACC           | 0.013 | 1.605 | 0.56406 | 1 | 2 | 1 | 2482 | 278.4 | 627321.8203 | 0 | 1727938.953 | 0.00 | 0.00 |
| Q8MT18 | CG5028        | 0.014 | 1.54  | 2.48756 | 1 | 1 | 1 | 402  | 44.4  | 630429.7344 | 0 | 0           | 0.00 | N/A  |
| Q9W1M9 | Rrp4          | 0.013 | 2.775 | 4.02685 | 1 | 1 | 1 | 298  | 33.6  | 667385.9375 | 0 | 0           | 0.00 | N/A  |
| Q9VEX6 | bor           | 0     | 3.944 | 2.31788 | 1 | 2 | 1 | 604  | 68.3  | 778728.1875 | 0 | 933052.5781 | 0.00 | 0.00 |
| Q9VKM7 | CG6089        | 0.013 | 2.129 | 1.62482 | 1 | 1 | 1 | 677  | 75.6  | 778774.9648 | 0 | 0           | 0.00 | N/A  |
| P23226 | Map205        | 0.013 | 2.819 | 1.51899 | 1 | 3 | 1 | 1185 | 126.6 | 813109.1641 | 0 | 593726.6563 | 0.00 | 0.00 |
| P21914 | SdhB          | 0.013 | 2.236 | 3.367   | 1 | 1 | 1 | 297  | 33.7  | 959783.3477 | 0 | 0           | 0.00 | N/A  |
| M9PG47 | RpS26         | 0.013 | 1.996 | 13.1579 | 1 | 1 | 1 | 114  | 13.3  | 1100433.813 | 0 | 0           | 0.00 | N/A  |
| Q95PE4 | Mpp6          | 0.013 | 1.798 | 6.17284 | 1 | 1 | 1 | 162  | 18.5  | 1135067.734 | 0 | 0           | 0.00 | N/A  |
| M9PHQ0 | shi           | 0     | 3.104 | 2.12054 | 1 | 1 | 1 | 896  | 99.8  | 1711311.484 | 0 | 0           | 0.00 | N/A  |
| Q9VHD1 | CG16779       | 0.013 | 1.696 | 0.70707 | 1 | 1 | 1 | 1980 | 207.7 | 2054681.867 | 0 | 0           | 0.00 | N/A  |
| Q9VT33 | CG6767        | 0     | 3.192 | 4.38144 | 1 | 3 | 1 | 388  | 42.7  | 2096243.047 | 0 | 2004849.59  | 0.00 | 0.00 |
| M9NDP2 | CG7394        | 0     | 6.393 | 16.1017 | 1 | 2 | 1 | 118  | 12.9  | 2634597.875 | 0 | 3083518     | 0.00 | 0.00 |
| P05812 | Hsp67Ba       | 0.016 | 1.408 | 7.56303 | 1 | 2 | 1 | 238  | 26.6  | 6504290.758 | 0 | 0           | 0.00 | N/A  |
| Q9VKG8 | Dlg5          | 0.029 | 1.012 | 0.6263  | 1 | 1 | 1 | 1916 | 209.7 | 7033423.398 | 0 | 0           | 0.00 | N/A  |
| Q9VB86 | TwidIT        | 0.029 | 1.028 | 2.7972  | 1 | 1 | 1 | 286  | 27    | 0           | 0 | 1372603.906 | N/A  | 0.00 |
| Q9VBN5 | RpL27         | 0.013 | 2.478 | 7.40741 | 1 | 1 | 1 | 135  | 15.9  | 0           | 0 | 1327863.672 | N/A  | 0.00 |
| P04359 | RpL32         | 0.026 | 1.089 | 6.71642 | 1 | 1 | 1 | 134  | 16    | 0           | 0 | 391358.9746 | N/A  | 0.00 |
| Q9VTA8 | CG14153       | 0.029 | 1.021 | 6.75105 | 1 | 1 | 1 | 237  | 27.5  | 0           | 0 | 1380635.793 | N/A  | 0.00 |
| Q9W3W8 | RpL17         | 0.013 | 2.213 | 5.91398 | 1 | 1 | 1 | 186  | 21.6  | 0           | 0 | 961493.7227 | N/A  | 0.00 |
| Q95083 | Prosalpha5    | 0     | 4.067 | 4.91803 | 1 | 1 | 1 | 244  | 26.9  | 0           | 0 | 1297764.531 | N/A  | 0.00 |
| Q9VBL2 | CG5890-RA     | 0.013 | 1.735 | 10.1942 | 1 | 1 | 1 | 206  | 24    | 0           | 0 | 0           | N/A  | N/A  |
| Q8IQW5 | CG14207-RB    | 0.013 | 2.738 | 13.0208 | 1 | 1 | 1 | 192  | 21.8  | 0           | 0 | 2637378.984 | N/A  | 0.00 |
| Q9VTP4 | RpL10Ab       | 0     | 4.794 | 5.99078 | 1 | 1 | 1 | 217  | 24.3  | 0           | 0 | 3485973.094 | N/A  | 0.00 |
| Q9VMC9 | KFase         | 0.013 | 2.59  | 3.66667 | 1 | 1 | 1 | 300  | 34.9  | 0           | 0 | 1383053.063 | N/A  | 0.00 |
| P22769 | Prosalpha4    | 0     | 3.846 | 8.83534 | 1 | 2 | 1 | 249  | 28    | 0           | 0 | 2848129.656 | N/A  | 0.00 |
| Q94516 | ATPsynB       | 0.024 | 1.098 | 3.7037  | 1 | 1 | 1 | 243  | 27.3  | 0           | 0 | 750190.4063 | N/A  | 0.00 |
| O76742 | Rab7          | 0.014 | 1.521 | 4.83092 | 1 | 1 | 1 | 207  | 23.3  | 0           | 0 | 1020528.266 | N/A  | 0.00 |
| Q8IRH8 | tfc           | 0.017 | 1.293 | 2.12766 | 1 | 1 | 1 | 376  | 42.9  | 0           | 0 | 1908787.672 | N/A  | 0.00 |
| Q9U9Q4 | eIF-3p40      | 0.013 | 2.569 | 3.25444 | 1 | 1 | 1 | 338  | 38.4  | 0           | 0 | 524448.6797 | N/A  | 0.00 |
| P48809 | Hrb27C        | 0     | 3.214 | 3.80048 | 1 | 1 | 1 | 421  | 44.7  | 0           | 0 | 1830851.938 | N/A  | 0.00 |
| Q9VIW5 | CG10237       | 0.013 | 2.575 | 3.7037  | 1 | 1 | 1 | 324  | 37.6  | 0           | 0 | 1971984.516 | N/A  | 0.00 |
| Q9V3P3 | REG           | 0     | 2.908 | 5.30612 | 1 | 1 | 1 | 245  | 28.1  | 0           | 0 | 1530383.125 | N/A  | 0.00 |
| P48596 | Pu            | 0.014 | 1.491 | 3.7037  | 1 | 1 | 1 | 324  | 35.5  | 0           | 0 | 2895696.578 | N/A  | 0.00 |
| M9PDQ9 | CG31974       | 0.018 | 1.186 | 8.65385 | 1 | 1 | 1 | 416  | 47.8  | 0           | 0 | 1165439.715 | N/A  | 0.00 |
| Q7K485 | cathD         | 0.013 | 1.613 | 6.88776 | 1 | 1 | 1 | 392  | 42.4  | 0           | 0 | 0           | N/A  | N/A  |
| Q9W5H1 | EG:BACR37P7.9 | 0.013 | 2.42  | 5.15152 | 1 | 1 | 1 | 330  | 35.8  | 0           | 0 | 628973.8906 | N/A  | 0.00 |
| Q9VJV9 | Droj2         | 0.013 | 2.156 | 3.22581 | 1 | 1 | 1 | 403  | 45.2  | 0           | 0 | 1133695.563 | N/A  | 0.00 |
| E1JJF3 | Inx2          | 0     | 3.082 | 4.35967 | 1 | 1 | 1 | 367  | 42.5  | 0           | 0 | 0           | N/A  | N/A  |
| M9PCC1 | Rack1         | 0     | 3.195 | 3.77358 | 1 | 1 | 1 | 318  | 35.6  | 0           | 0 | 1715564.211 | N/A  | 0.00 |
| X2JFR6 | eIF2alpha     | 0.013 | 2.844 | 3.51906 | 1 | 1 | 1 | 341  | 38.6  | 0           | 0 | 2500944.938 | N/A  | 0.00 |
| Q9VKJ0 | hgo           | 0.013 | 2.208 | 2.2779  | 1 | 1 | 1 | 439  | 49.4  | 0           | 0 | 1197470.641 | N/A  | 0.00 |
| Q9VVF3 | CG11796       | 0.016 | 1.299 | 4.47368 | 1 | 1 | 1 | 380  | 43.3  | 0           | 0 | 5436149.305 | N/A  | 0.00 |
| Q9VJI1 | CG17928       | 0     | 5.029 | 3.1746  | 1 | 1 | 1 | 441  | 51.2  | 0           | 0 | 1593383.344 | N/A  | 0.00 |
| P14199 | ref(2)P       | 0.013 | 1.787 | 1.66945 | 1 | 1 | 1 | 599  | 65.3  | 0           | 0 | 2750251.234 | N/A  | 0.00 |

|          |             |       |       |         |   |   |   |      |       |             |             |             |      |      |
|----------|-------------|-------|-------|---------|---|---|---|------|-------|-------------|-------------|-------------|------|------|
| P54352   | eas         | 0.026 | 1.078 | 4.05405 | 1 | 1 | 1 | 518  | 59.5  | 0           | 0           | 397316.6797 | N/A  | 0.00 |
| Q8IQB4   | Zasp66      | 0.018 | 1.172 | 2.7907  | 1 | 1 | 1 | 430  | 47.6  | 0           | 0           | 1719786.188 | N/A  | 0.00 |
| Q9Vfq9   | Dip-B       | 0     | 3.676 | 5.31496 | 1 | 1 | 1 | 508  | 55.5  | 0           | 0           | 2509038.813 | N/A  | 0.00 |
| Q9VAZ0   | CG5003-RA   | 0     | 3.43  | 1.82328 | 1 | 1 | 1 | 713  | 80.4  | 0           | 0           | 1064672.531 | N/A  | 0.00 |
| Q9Y0Z0   | mmy         | 0.013 | 1.939 | 2.11538 | 1 | 1 | 1 | 520  | 58.2  | 0           | 0           | 580262.1797 | N/A  | 0.00 |
| Q9V431   | Aac11       | 0.013 | 2.249 | 2.05224 | 1 | 1 | 1 | 536  | 59.9  | 0           | 0           | 470999.4219 | N/A  | 0.00 |
| P21187   | pAbp        | 0     | 3.367 | 2.68139 | 1 | 2 | 1 | 634  | 69.9  | 0           | 0           | 0           | N/A  | N/A  |
| A0A0B4K6 | alpha-Est10 | 0.013 | 1.706 | 3.61446 | 1 | 1 | 1 | 581  | 65.7  | 0           | 0           | 3984580.344 | N/A  | 0.00 |
| Q27597   | Cpr         | 0.013 | 2.365 | 2.06186 | 1 | 1 | 1 | 679  | 76.3  | 0           | 0           | 1298412.688 | N/A  | 0.00 |
| Q9W261   | Rtf1        | 0.013 | 2.645 | 2.19355 | 1 | 1 | 1 | 775  | 87.5  | 0           | 0           | 0           | N/A  | N/A  |
| Q9W410   | CG3815      | 0     | 2.892 | 2.3918  | 1 | 1 | 1 | 878  | 98.3  | 0           | 0           | 832702.0625 | N/A  | 0.00 |
| Q9VF51   | AOX3        | 0     | 5.139 | 1.51515 | 1 | 1 | 1 | 1254 | 137.8 | 0           | 0           | 2376128.125 | N/A  | 0.00 |
| E1JGY6   | I(2)01289   | 0.029 | 1.022 | 0.50392 | 1 | 1 | 1 | 1786 | 204.6 | 0           | 0           | 1647809.492 | N/A  | 0.00 |
| P06742   | Mlc1        | 0     | 3.224 | 8.3871  | 1 | 3 | 1 | 155  | 17.5  | 4793547.188 | 8619149.063 | 5001028.234 | 1.80 | 1.72 |
| Q9VSF9   | CG13674     | 0     | 4.201 | 22.6277 | 1 | 5 | 1 | 137  | 13.3  | 7464044.195 | 8570083.531 | 1965625.75  | 1.15 | 4.36 |
| P91941   | Acp65Aa     | 0     | 6.668 | 24.7619 | 1 | 4 | 1 | 105  | 11.3  | 1363856.719 | 7148113.367 | 7958431.5   | 5.24 | 0.90 |
| A0A0B4LC | Mlp60A      | 0     | 3.721 | 23.913  | 1 | 4 | 1 | 92   | 10    | 6472322.672 | 6738209.438 | 7249928.313 | 1.04 | 0.93 |
| D1Z3A1   | RpL28       | 0     | 4.461 | 8.33333 | 1 | 2 | 1 | 144  | 16    | 4653205.945 | 5607568.875 | 0           | 1.21 | N/A  |
| Q9VDH8   | RpS30       | 0.013 | 1.659 | 8.33333 | 1 | 2 | 1 | 132  | 14.6  | 5934482.391 | 5247327.219 | 0           | 0.88 | N/A  |
| D1YSG8   | CaMKII      | 0.013 | 2.57  | 2.44821 | 1 | 2 | 1 | 531  | 60    | 2379033.125 | 3348804.328 | 0           | 1.41 | N/A  |
| Q9V4B8   | CG10323     | 0.013 | 2.144 | 1.09051 | 1 | 4 | 1 | 917  | 102   | 2780595.605 | 3311330.148 | 2604238.641 | 1.19 | 1.27 |
| Q9VE04   | mRpL55      | 0     | 4.061 | 15.8879 | 1 | 3 | 1 | 107  | 12.6  | 2908783.809 | 2828717.688 | 3155860.578 | 0.97 | 0.90 |
| Q9VXN2   | sun         | 0     | 4.996 | 24.5902 | 1 | 3 | 1 | 61   | 6.8   | 2777717.75  | 2714757.641 | 1844447.125 | 0.98 | 1.47 |
| Q9VB15   | tau         | 0.016 | 1.33  | 1.67364 | 1 | 2 | 1 | 717  | 77.9  | 0           | 2690846.156 | 2164158.875 | N/A  | 1.24 |
| Q9VEF5   | CG7379      | 0     | 4.059 | 2.07852 | 1 | 5 | 1 | 433  | 45.7  | 2253603.188 | 2623673.953 | 2224414.305 | 1.16 | 1.18 |
| A0A0B4LF | ATPsynD     | 0     | 3.098 | 7.30337 | 1 | 3 | 1 | 178  | 20.2  | 2672359.719 | 2615169.414 | 2297364     | 0.98 | 1.14 |
| A1ZBW0   | HnRNP-K     | 0     | 3.257 | 2.78884 | 1 | 1 | 1 | 502  | 51    | 0           | 2494804.938 | 0           | N/A  | N/A  |
| Q9W1N3   | levy        | 0     | 4.063 | 15.5963 | 1 | 3 | 1 | 109  | 12.5  | 0           | 2479924.109 | 2322013.023 | N/A  | 1.07 |
| A8JQV3   | CG17816     | 0     | 3.97  | 2.26757 | 1 | 3 | 1 | 882  | 96.3  | 0           | 2173201.625 | 2775926.516 | N/A  | 0.78 |
| M9NDM4   | wds         | 0     | 2.934 | 3.87812 | 1 | 1 | 1 | 361  | 39    | 0           | 2151409.906 | 0           | N/A  | N/A  |
| Q8IP51   | wb          | 0.031 | 1.004 | 0.41481 | 1 | 1 | 1 | 3375 | 374.5 | 0           | 2069401.148 | 0           | N/A  | N/A  |
| O16797   | RpL3        | 0     | 4.37  | 4.80769 | 1 | 3 | 1 | 416  | 46.9  | 0           | 2028442.625 | 1942195.594 | N/A  | 1.04 |
| Q9W164   | Crtp        | 0.016 | 1.305 | 2.01342 | 1 | 1 | 1 | 745  | 86.1  | 0           | 1931744.141 | 0           | N/A  | N/A  |
| A0A0C4DF | RpS29       | 0.018 | 1.163 | 23.2143 | 1 | 1 | 1 | 56   | 6.6   | 0           | 1928251.656 | 0           | N/A  | N/A  |
| Q9W2X6   | ATPsyndelta | 0     | 6.943 | 9.55414 | 1 | 2 | 1 | 157  | 16.7  | 0           | 1697829.797 | 1456139.375 | N/A  | 1.17 |
| Q9VE73   | CG12333     | 0.014 | 1.478 | 3.6961  | 1 | 2 | 1 | 487  | 53    | 0           | 1622983.188 | 0           | N/A  | N/A  |
| P19334   | trp         | 0.014 | 1.582 | 1.2549  | 1 | 1 | 1 | 1275 | 142.5 | 0           | 1620202.344 | 0           | N/A  | N/A  |
| B5RIV0   | bgm         | 0.013 | 1.962 | 3.003   | 1 | 1 | 1 | 666  | 73.6  | 0           | 1536955.828 | 0           | N/A  | N/A  |
| Q95U38   | skap        | 0     | 3.679 | 2.7833  | 1 | 3 | 1 | 503  | 54.9  | 2406199.504 | 1506430.563 | 1640346.023 | 0.63 | 0.92 |
| Q9VGP7   | mRpL40      | 0     | 3.214 | 4.59184 | 1 | 3 | 1 | 196  | 22.5  | 2300804.25  | 1501342.313 | 1301013.875 | 0.65 | 1.15 |
| Q9VK69   | CCT4        | 0.013 | 2.798 | 5.4409  | 1 | 3 | 1 | 533  | 57.1  | 4189494.852 | 1438966.313 | 0           | 0.34 | N/A  |
| Q9VWG3   | RpS10b      | 0.013 | 1.892 | 8.125   | 1 | 2 | 1 | 160  | 17.9  | 1649193.719 | 1415037.5   | 0           | 0.86 | N/A  |
| Q9VV42   | Pdh         | 0     | 4.01  | 5.39568 | 1 | 1 | 1 | 278  | 30.1  | 0           | 1349227.375 | 0           | N/A  | N/A  |
| A0A0B4K7 | mod         | 0.013 | 2.415 | 2.39852 | 1 | 2 | 1 | 542  | 60.3  | 0           | 1304791.664 | 704215.3711 | N/A  | 1.85 |
| Q9VCI3   | Lsd-1       | 0     | 4.365 | 3.7123  | 1 | 2 | 1 | 431  | 48.8  | 1166754.609 | 1273400.781 | 0           | 1.09 | N/A  |

|          |           |       |       |         |   |   |   |      |       |             |             |             |      |      |
|----------|-----------|-------|-------|---------|---|---|---|------|-------|-------------|-------------|-------------|------|------|
| P22058   | D1        | 0.013 | 2.088 | 4.50704 | 1 | 2 | 1 | 355  | 37    | 0           | 1268329.828 | 1601835.223 | N/A  | 0.79 |
| P27398   | sol       | 0.014 | 1.529 | 1.12923 | 1 | 1 | 1 | 1594 | 174.2 | 0           | 1212529.438 | 0           | N/A  | N/A  |
| Q9W1G7   | Nap1      | 0     | 4.267 | 4.86486 | 1 | 2 | 1 | 370  | 42.7  | 0           | 1175019.172 | 1527000.992 | N/A  | 0.77 |
| Q9W334   | RpS28b    | 0.013 | 2.657 | 30.7692 | 1 | 1 | 1 | 65   | 7.5   | 0           | 1136351.359 | 0           | N/A  | N/A  |
| Q9VE08   | CG6013    | 0     | 3.321 | 6.10329 | 1 | 2 | 1 | 213  | 24.8  | 0           | 1125233.484 | 694050.2734 | N/A  | 1.62 |
| M9PF16   | beta-Spec | 0     | 4.587 | 0.82322 | 1 | 1 | 1 | 2308 | 267.5 | 0           | 1116245.973 | 0           | N/A  | N/A  |
| Q9VV95   | CG13026   | 0.013 | 1.835 | 11.0169 | 1 | 1 | 1 | 118  | 13.1  | 0           | 1104162.426 | 0           | N/A  | N/A  |
| Q9VGF7   | GC1       | 0     | 3.032 | 4.04984 | 1 | 2 | 1 | 321  | 34.5  | 1507563.633 | 1088181.984 | 0           | 0.72 | N/A  |
| Q9W4V3   | CG14419   | 0.013 | 2.719 | 5.64103 | 1 | 1 | 1 | 195  | 21    | 0           | 1031873.813 | 0           | N/A  | N/A  |
| A0A0B4Kf | Syp       | 0.013 | 1.7   | 1.31406 | 1 | 1 | 1 | 761  | 83    | 0           | 1030648.781 | 0           | N/A  | N/A  |
| O61491   | Flo1      | 0     | 4.314 | 3.05164 | 1 | 2 | 1 | 426  | 47.1  | 0           | 1025742.336 | 1009637.234 | N/A  | 1.02 |
| M9PGH7   | G9a       | 0     | 3.275 | 1.4484  | 1 | 2 | 1 | 1657 | 183.4 | 880593.6094 | 1023803.938 | 0           | 1.16 | N/A  |
| O97183   | Rpil33    | 0.013 | 2.157 | 5.09091 | 1 | 2 | 1 | 275  | 31.2  | 0           | 1007158.891 | 1463556.875 | N/A  | 0.69 |
| A0A0B4Kf | aralar1   | 0.018 | 1.178 | 1.69731 | 1 | 1 | 1 | 707  | 78.3  | 0           | 938812.3164 | 0           | N/A  | N/A  |
| Q9VZZ6   | CG16985   | 0     | 3.04  | 9.39597 | 1 | 2 | 1 | 149  | 16.1  | 0           | 901808.6406 | 2668105.156 | N/A  | 0.34 |
| X2JEE5   | CG2157    | 0     | 5.257 | 6.07287 | 1 | 1 | 1 | 247  | 24.2  | 0           | 885223.0313 | 0           | N/A  | N/A  |
| Q0E9B6   | RpS11     | 0.013 | 2.284 | 5.16129 | 1 | 3 | 1 | 155  | 18.1  | 887384.6563 | 876053.1992 | 631292.2031 | 0.99 | 1.39 |
| Q9VMS1   | cype      | 0.013 | 2.372 | 18.1818 | 1 | 2 | 1 | 77   | 8.3   | 662177.3047 | 843698.0391 | 0           | 1.27 | N/A  |
| A0A0B4Kf | Tm2       | 0     | 3.326 | 4.92958 | 1 | 1 | 1 | 284  | 32.8  | 0           | 836704.6797 | 0           | N/A  | N/A  |
| Q9VU46   | CG11279   | 0.013 | 2.344 | 9.80392 | 1 | 3 | 1 | 102  | 11.1  | 1102136.715 | 805028.0352 | 0           | 0.73 | N/A  |
| P29327   | RpS6      | 0.013 | 1.755 | 6.45161 | 1 | 3 | 1 | 248  | 28.4  | 888191.9063 | 804354.5156 | 1060000.406 | 0.91 | 0.76 |
| Q8IPX7   | Rrp40     | 0.013 | 2.019 | 4.31034 | 1 | 2 | 1 | 232  | 25    | 970316.3438 | 764314.457  | 0           | 0.79 | N/A  |
| Q9VZU0   | CG12032   | 0.018 | 1.198 | 8.10811 | 1 | 3 | 1 | 111  | 12.1  | 1313739.914 | 761855.5938 | 658440.8555 | 0.58 | 1.16 |
| Q9V405   | Rpt3      | 0.013 | 2.192 | 3.38983 | 1 | 2 | 1 | 413  | 47    | 0           | 754169.457  | 771334.2539 | N/A  | 0.98 |
| O61231   | RpL10     | 0.013 | 2.119 | 4.12844 | 1 | 2 | 1 | 218  | 25.5  | 0           | 713320.0938 | 0           | N/A  | N/A  |
| Q9VP57   | pzg       | 0.013 | 1.756 | 1.60643 | 1 | 1 | 1 | 996  | 105   | 0           | 685775.3711 | 0           | N/A  | N/A  |
| Q9VM97   | Tsp       | 0.013 | 2.321 | 0.84906 | 1 | 3 | 1 | 1060 | 118.2 | 1252495.555 | 612714.0957 | 1589860.938 | 0.49 | 0.39 |
| Q9VD58   | CG6439    | 0     | 3.123 | 3.51351 | 1 | 2 | 1 | 370  | 40.4  | 573764.6406 | 590435.3828 | 0           | 1.03 | N/A  |
| Q9VEJ3   | P5cr-2    | 0     | 3.729 | 4.7619  | 1 | 2 | 1 | 273  | 28.1  | 806691.5781 | 519889.5938 | 0           | 0.64 | N/A  |
| Q9VGG1   | CG5214    | 0.013 | 2.001 | 2.99145 | 1 | 3 | 1 | 468  | 49.9  | 1115684.039 | 509621.7266 | 1173136.697 | 0.46 | 0.43 |
| P06002   | ninaE     | 0     | 5.934 | 4.55764 | 1 | 3 | 1 | 373  | 41.5  | 644597.5879 | 498174.8281 | 622486.7422 | 0.77 | 0.80 |
| Q7KVX1   | I(1)G0334 | 0.014 | 1.545 | 2.0316  | 1 | 3 | 1 | 443  | 48.8  | 416363.9453 | 386394.418  | 416600.0156 | 0.93 | 0.93 |
| Q9XY35   | ox        | 0.013 | 2.077 | 30.9091 | 1 | 1 | 1 | 55   | 6.3   | 0           | 333814.0625 | 0           | N/A  | N/A  |
| Q9W327   | LysRS     | 0.016 | 1.297 | 2.14168 | 1 | 1 | 1 | 607  | 68.5  | 0           | 307615.6563 | 0           | N/A  | N/A  |
| Q9XYW6   | STUB1     | 0.013 | 2.607 | 3.11419 | 1 | 3 | 1 | 289  | 33.8  | 371029.2891 | 305149.2656 | 765233.125  | 0.82 | 0.40 |
| P32234   | 128up     | 0.013 | 2.396 | 4.07609 | 1 | 3 | 1 | 368  | 41.1  | 0           | 274242      | 669593.3672 | N/A  | 0.41 |
| A0A0B4Kf | jbug      | 0.02  | 1.148 | 0.36789 | 1 | 1 | 1 | 2990 | 322.6 | 0           | 242410.0469 | 0           | N/A  | N/A  |

**Supplementary Table 10** Primers used in this study

| Primer name    | Sequence of primers (5'→3') |
|----------------|-----------------------------|
| Kay mRNA F     | TGTTCAACATGCCGCTGTCTG       |
| Kay mRNA R     | CCAGTGTGTCCTCGATGTTGC       |
| Myo31DF mRNA F | TGGTGGGCATTGTGTGCAAG        |
| Myo31DF mRNA R | ATAATGCGTGCCTTGCCGTC        |
| sr mRNA F      | CGCCAAGGTGCATCTGAAGC        |
| sr mRNA R      | TGCTGCTGCTGCTGTTGTTG        |
| h mRNA F       | CAAGCCATCGGTCATCCAGC        |
| h mRNA R       | TGCTCCTCCTCCTTGATCTGC       |
| grh mRNA F     | ATGAGACTGACTCGCCGGAC        |
| grh mRNA R     | GGTTGTGGAACCTTGAGCGTCG      |

**Supplementary Table 2** Peptides identified in the coimmunoprecipitates with Rpd3

The peptide amount in the control (untreated) or the TRPA1-activated samples were calculated using Skyline.

The relative amount of each peptide in the TRPA1-activated samples was determined by dividing the peptide amount in the TRPA1-activated samples by that in the untreated samples, which value was further normalized by the amount of Rpd3 determined using Proteome discoverer 2.1. (untreated:TRPA1-activated=1:0.77).

| Peptide Sequence       | Gene    | Protein names                                                                        | Precursor Mz | Precursor Charge | Retention Time (untreated) | Amount (untreated) | Retention Time (TRPA1-activated) | Amount (TRPA1-activated) | Relative amount | Number of amino acid in CoRest-F (824 a.a) |
|------------------------|---------|--------------------------------------------------------------------------------------|--------------|------------------|----------------------------|--------------------|----------------------------------|--------------------------|-----------------|--------------------------------------------|
| ALLVWSPTK              | CoRest  | CoRest, isoform G (CoRest, isoform H) (CoRest, isoform I) (IP20671p)                 | 507.803      | 2                | 37.31                      | 2318735            | 37.1                             | 1637547                  | 0.91741         | 120-128 a.a., exon 3                       |
| VLFEQAFQFHGK           | CoRest  | CoRest, isoform G (CoRest, isoform H) (CoRest, isoform I) (IP20671p)                 | 484.254      | 3                | 38.03                      | 957244             | 37.88                            | 274801                   | 0.37292         | 187-198 a.a., exon 4                       |
| SIASLVK                | CoRest  | CoRest, isoform G (CoRest, isoform H) (CoRest, isoform I) (IP20671p)                 | 359.229      | 2                | 23.99                      | 840931             | 23.99                            | 310644                   | 0.47987         | 211-217 a.a., exon 5                       |
| RPISGPEGNAPR           | CoRest  | CoRest, isoform G (CoRest, isoform H) (CoRest, isoform I) (IP20671p)                 | 417.558      | 3                | 11.45                      | 316853             | 11.49                            | 105613                   | 0.43299         | 433-444 a.a., exon 7                       |
| TQTSSELSAQK            | CoRest  | CoRest, isoform G (CoRest, isoform H) (CoRest, isoform I) (IP20671p)                 | 654.818      | 2                | 11.1                       | 1476303            | 11.23                            | 860048                   | 0.75678         | 754-765 a.a., exon 9                       |
| DSSVLPVAEQPPAK         | CoRest  | CoRest, isoform G (CoRest, isoform H) (CoRest, isoform I) (IP20671p)                 | 719.383      | 2                | 26.69                      | 3357320            | 26.66                            | 3402373                  | 1.31647         | 793-806 a.a., exon 9-10                    |
| IALSTGGGSSVAEFLAN      | CoRest  | CoRest, isoform G (CoRest, isoform H) (CoRest, isoform I) (IP20671p)                 | 797.41       | 2                | 44.77                      | 1725679            | 44.51                            | 2728085                  | 2.05362         | 808-824 a.a., exon 10                      |
| TYSSRPVTTSYAVTR        | CG45078 | Uncharacterized protein CG45078                                                      | 563.625      | 3                | 19.03                      | 263179             | 19.02                            | 412016                   | 2.03369         |                                            |
| VPFVPRPRLISDPVTAFGVR   | CG45078 | Uncharacterized protein CG45078                                                      | 718.741      | 3                | 48.47                      | 199755             | 48.27                            | 553533                   | 3.59972         |                                            |
| LDLCTDRPGSHR           | fau     | Protein anoxia up-regulated                                                          | 476.233      | 3                | 15.84                      | 528306             | 15.79                            | 874608                   | 2.15055         |                                            |
| SGPGGSYNYSTER          | fau     | Protein anoxia up-regulated                                                          | 687.8        | 2                | 14.6                       | 687443             | 14.6                             | 1415134                  | 2.67413         |                                            |
| SSYDSSNPHSYRPER        | fau     | Protein anoxia up-regulated                                                          | 594.599      | 3                | 11.24                      | 242334             | 11.32                            | 514451                   | 2.75773         |                                            |
| TYSSRPVTTSYAVTTPR      | fau     | Protein anoxia up-regulated                                                          | 629.658      | 3                | 21.82                      | 429567             | 21.83                            | 928750                   | 2.8086          |                                            |
| IEDVTPIPSDSTR          | RpS14a  | 40S ribosomal protein S14a                                                           | 715.362      | 2                | 24.62                      | 3641721            | 24.6                             | 2484539                  | 0.88626         |                                            |
| TLGITALHIK             | RpS14a  | 40S ribosomal protein S14a                                                           | 533.835      | 2                | 32.9                       | 2242098            | 32.75                            | 2243891                  | 1.30008         |                                            |
| TLGITALHIK             | RpS14a  | 40S ribosomal protein S14a                                                           | 356.225      | 3                | 32.86                      | 2809070            | 32.75                            | 2994782                  | 1.38492         |                                            |
| IEDVTPIPSDSTR          | RpS14b  | 40S ribosomal protein S14b                                                           | 715.362      | 2                | 24.62                      | 3641721            | 24.6                             | 2484539                  | 0.88626         |                                            |
| TLGITALHIK             | RpS14b  | 40S ribosomal protein S14b                                                           | 533.835      | 2                | 32.9                       | 2242098            | 32.75                            | 2243891                  | 1.30008         |                                            |
| TLGITALHIK             | RpS14b  | 40S ribosomal protein S14b                                                           | 356.225      | 3                | 32.86                      | 2809070            | 32.75                            | 2994782                  | 1.38492         |                                            |
| ELIEIISGAAALT          | ATPsynγ | ATP synthase subunit gamma, mitochondrial (F-ATPase gamma subunit)                   | 650.872      | 2                | 52.67                      | 6635864            | 52.44                            | 7721958                  | 1.51165         |                                            |
| GELAQDEANTK            | ATPsynγ | ATP synthase subunit gamma, mitochondrial (F-ATPase gamma subunit)                   | 588.281      | 2                | 10.74                      | 294246             | 10.81                            | 49515                    | 0.2186          |                                            |
| GLCGAVHTGVAR           | ATPsynγ | ATP synthase subunit gamma, mitochondrial (F-ATPase gamma subunit)                   | 599.311      | 2                | 16.19                      | 595810             | 16.17                            | 374856                   | 0.8173          |                                            |
| GLCGAVHTGVAR           | ATPsynγ | ATP synthase subunit gamma, mitochondrial (F-ATPase gamma subunit)                   | 399.877      | 3                | 16.19                      | 1960498            | 16.14                            | 986502                   | 0.65366         |                                            |
| IANEVLQGTGYDYTEGK      | ATPsynγ | ATP synthase subunit gamma, mitochondrial (F-ATPase gamma subunit)                   | 900.936      | 2                | 31.83                      | 2132738            | 31.71                            | 1347957                  | 0.82103         |                                            |
| LAVYDSLSDSVVK          | ATPsynγ | ATP synthase subunit gamma, mitochondrial (F-ATPase gamma subunit)                   | 712.369      | 2                | 34.68                      | 2559894            | 34.55                            | 2322704                  | 1.17868         |                                            |
| LLIAVTSR               | ATPsynγ | ATP synthase subunit gamma, mitochondrial (F-ATPase gamma subunit)                   | 494.295      | 2                | 29.56                      | 1159992            | 29.57                            | 707980                   | 0.79285         |                                            |
| SVVSYQCSTLPIFSGSTVEK   | ATPsynγ | ATP synthase subunit gamma, mitochondrial (F-ATPase gamma subunit)                   | 1095.04      | 2                | 42.41                      | 556083             | 42.14                            | 284362                   | 0.66428         |                                            |
| FFHLYIEEFAR            | eIF3i   | Eukaryotic translation initiation factor 3 subunit I (eIF3i) (Eukaryotic translatior | 534.265      | 3                | 42.14                      | 169782             | 42.06                            | 535132                   | 4.09441         |                                            |
| SYASGGEDGFVR           | eIF3i   | Eukaryotic translation initiation factor 3 subunit I (eIF3i) (Eukaryotic translatior | 622.781      | 2                | 20.66                      | 314052             | 20.64                            | 486210                   | 2.01115         |                                            |
| AAVEEGIVPGGGTALLR      | Hsp60A  | Heat shock protein 60A                                                               | 805.449      | 2                | 37.57                      | 3201747            | 37.41                            | 3272869                  | 1.3279          |                                            |
| FGPEVR                 | Hsp60A  | Heat shock protein 60A                                                               | 352.69       | 2                | 17.41                      | 1545828            | 17.45                            | 1317497                  | 1.10716         |                                            |
| KPLVIIAEDIDGALSTLVVNR  | Hsp60A  | Heat shock protein 60A                                                               | 789.116      | 3                | 52.44                      | 2091770            | 52.29                            | 1657875                  | 1.02958         |                                            |
| LVQDVANNTNEEAGDGTATVLA | Hsp60A  | Heat shock protein 60A                                                               | 854.088      | 3                | 28.53                      | 1313197            | 28.39                            | 1332802                  | 1.31843         |                                            |
| VEFQDALLLLSEK          | Hsp60A  | Heat shock protein 60A                                                               | 752.917      | 2                | 52.37                      | 697568             | 52.05                            | 393900                   | 0.73354         |                                            |
| VHDALNATR              | Hsp60A  | Heat shock protein 60A                                                               | 498.765      | 2                | 10.63                      | 556580             | 10.7                             | 377032                   | 0.87998         |                                            |
| DVLSVAFSADNR           | Rack1   | Guanine nucleotide-binding protein subunit beta-like protein (Receptor of activ      | 647.325      | 2                | 37.28                      | 534801             | 37.1                             | 522154                   | 1.26832         |                                            |
| GAFGKPGQGTVAR          | RpL10   | 60S ribosomal protein L10 (QM protein homolog) (dQM)                                 | 396.888      | 3                | 13.7                       | 378695             | 13.67                            | 452705                   | 1.55292         |                                            |
| IFDLGR                 | RpL10   | 60S ribosomal protein L10 (QM protein homolog) (dQM)                                 | 360.706      | 2                | 28.76                      | 454688             | 28.68                            | 577700                   | 1.65048         |                                            |
| VAAEVAAPLSQAK          | Flo1    | Flotillin-1                                                                          | 627.856      | 2                | 23.88                      | 83835              | 23.84                            | 638161                   | 9.88843         |                                            |
| IAAEVAAPLAK            | Flo2    | Flotillin-2                                                                          | 527.319      | 2                | 25.68                      | 101116             | 25.6                             | 592504                   | 7.61191         |                                            |
| ASAIIVITTSQK           | PyK     | Pyruvate kinase (PK) (EC 2.7.1.40)                                                   | 573.84       | 2                | 28.18                      | 1401434            | 28.12                            | 1081412                  | 1.0024          |                                            |
| GAGTIDASHAAIAAVEAATK   | PyK     | Pyruvate kinase (PK) (EC 2.7.1.40)                                                   | 632.666      | 3                | 35.16                      | 3178366            | 35.03                            | 2437479                  | 0.99623         |                                            |
| GDLGIEIPAEK            | PyK     | Pyruvate kinase (PK) (EC 2.7.1.40)                                                   | 571.309      | 2                | 32.68                      | 1575394            | 32.56                            | 1255028                  | 1.03487         |                                            |
| LQFDSPVPHVR            | PyK     | Pyruvate kinase (PK) (EC 2.7.1.40)                                                   | 647.849      | 2                | 29.48                      | 769777             | 29.09                            | 16679                    | 0.02815         |                                            |

|                          |        |                                                                         |         |   |       |           |       |           |         |
|--------------------------|--------|-------------------------------------------------------------------------|---------|---|-------|-----------|-------|-----------|---------|
| LQFDSPVPHVR              | PyK    | Pyruvate kinase (PK) (EC 2.7.1.40)                                      | 432.235 | 3 | 29.48 | 2084871   | 29.25 | 297903    | 0.18562 |
| QGSGFTNTR                | PyK    | Pyruvate kinase (PK) (EC 2.7.1.40)                                      | 540.775 | 2 | 18.98 | 564710    | 18.97 | 489131    | 1.12518 |
| TGLIGSGTAEIELK           | PyK    | Pyruvate kinase (PK) (EC 2.7.1.40)                                      | 723.396 | 2 | 34.9  | 2549848   | 34.74 | 1867825   | 0.95158 |
| VFLAQK                   | PyK    | Pyruvate kinase (PK) (EC 2.7.1.40)                                      | 353.218 | 2 | 18.01 | 683366    | 18.06 | 383744    | 0.72948 |
| VFVDDGLISLIVR            | PyK    | Pyruvate kinase (PK) (EC 2.7.1.40)                                      | 723.422 | 2 | 56.88 | 4755565   | 56.58 | 4688422   | 1.2807  |
| DAVITVPAYFNDSQR          | Hsp68  | Heat shock protein 68                                                   | 848.42  | 2 | 39.29 | 42651     | 39    | 450593    | 13.7239 |
| DNNVLGTGFDLTGVPPAPR      | Hsp68  | Heat shock protein 68                                                   | 941.987 | 2 | 45.67 | 0         | 45.84 | 849068    | #DIV/0! |
| LSQADIDR                 | Hsp68  | Heat shock protein 68                                                   | 459.238 | 2 | 14.58 | 83445     | 14.79 | 271197    | 4.22189 |
| NQLETYLFGVK              | Hsp68  | Heat shock protein 68                                                   | 656.351 | 2 | 43.03 | 758445    | 42.8  | 2051711   | 3.5141  |
| NTLEPVEK                 | Hsp68  | Heat shock protein 68                                                   | 465.251 | 2 | 14.95 | 24751     | 15.03 | 257980    | 13.5399 |
| STAGDTHLGGEDFDNR         | Hsp68  | Heat shock protein 68                                                   | 846.366 | 2 | 18.67 | 1657789   | 18.65 | 1831600   | 1.43524 |
| STAGDTHLGGEDFDNR         | Hsp68  | Heat shock protein 68                                                   | 564.58  | 3 | 18.67 | 10781481  | 18.68 | 14815577  | 1.7851  |
| TFTTYADNQPAVTIQVFEGER    | Hsp68  | Heat shock protein 68                                                   | 1194.08 | 2 | 43.53 | 110485    | 43.36 | 428462    | 5.03769 |
| TFTTYADNQPAVTIQVFEGER    | Hsp68  | Heat shock protein 68                                                   | 796.389 | 3 | 43.6  | 153324    | 43.44 | 1179773   | 9.99564 |
| TLSSSTEASLEIDALYEGHDFYSK | Hsp68  | Heat shock protein 68                                                   | 888.417 | 3 | 43.54 | 56614     | 43.43 | 736672    | 16.9033 |
| TTPSYVAFTDSER            | Hsp68  | Heat shock protein 68                                                   | 737.346 | 2 | 28.48 | 159128    | 28.32 | 60403172  | 493.101 |
| TTPSYVAFTDSER            | Hsp68  | Heat shock protein 68                                                   | 491.9   | 3 | 28.44 | 0         | 28.4  | 323797    | #DIV/0! |
| VEIIDQGNR                | Hsp68  | Heat shock protein 68                                                   | 614.818 | 2 | 18.24 | 20421124  | 18.27 | 30231408  | 1.9231  |
| VQNLLQNFVGGK             | Hsp68  | Heat shock protein 68                                                   | 682.87  | 2 | 49.08 | 23828     | 49.01 | 1232989   | 67.2193 |
| ADNSAPAAQDDGSGAPVVR      | Mi-2   | Chromodomain-helicase-DNA-binding protein Mi-2 homolog (EC 3.6.4.12) (A | 899.422 | 2 | 16.91 | 470838    | 16.88 | 285548    | 0.78783 |
| AVAAATSAATGATGK          | Mi-2   | Chromodomain-helicase-DNA-binding protein Mi-2 homolog (EC 3.6.4.12) (A | 624.333 | 2 | 13.11 | 1665996   | 13.11 | 983701    | 0.76703 |
| HHYEQHQEDVGR             | Mi-2   | Chromodomain-helicase-DNA-binding protein Mi-2 homolog (EC 3.6.4.12) (A | 512.231 | 3 | 7.62  | 201593    | 7.78  | 286609    | 1.84687 |
| HHYEQHQEDVGR             | Mi-2   | Chromodomain-helicase-DNA-binding protein Mi-2 homolog (EC 3.6.4.12) (A | 384.425 | 4 | 7.62  | 91019     | 7.78  | 138645    | 1.87877 |
| IDGGITGLR                | Mi-2   | Chromodomain-helicase-DNA-binding protein Mi-2 homolog (EC 3.6.4.12) (A | 501.783 | 2 | 24.03 | 1258518   | 24.04 | 897889    | 0.9268  |
| QAIDYYQDLR               | Mi-2   | Chromodomain-helicase-DNA-binding protein Mi-2 homolog (EC 3.6.4.12) (A | 642.815 | 2 | 28.79 | 539792    | 28.68 | 906085    | 2.18054 |
| SVTGDEPEEPR              | Mi-2   | Chromodomain-helicase-DNA-binding protein Mi-2 homolog (EC 3.6.4.12) (A | 608.278 | 2 | 13.23 | 438146    | 13.27 | 556388    | 1.64961 |
| VGGNIEVLGFNAR            | Mi-2   | Chromodomain-helicase-DNA-binding protein Mi-2 homolog (EC 3.6.4.12) (A | 673.365 | 2 | 37.32 | 2342650   | 37.14 | 3356129   | 1.86103 |
| LAPITGVTAYTVNPGITR       | Adh    | Alcohol dehydrogenase (EC 1.1.1.1)                                      | 922.517 | 2 | 39.24 | 126429    | 39    | 732773    | 7.52913 |
| LAPITGVTAYTVNPGITR       | Adh    | Alcohol dehydrogenase (EC 1.1.1.1)                                      | 615.347 | 3 | 39.28 | 26716     | 39.04 | 408326    | 19.8545 |
| NVIFVAGLGGIGLDTSK        | Adh    | Alcohol dehydrogenase (EC 1.1.1.1)                                      | 830.967 | 2 | 49.12 | 84006     | 48.78 | 717390    | 11.0935 |
| VTVTFYPYDVTVPVIAETTK     | Adh    | Alcohol dehydrogenase (EC 1.1.1.1)                                      | 1072.56 | 2 | 48.67 | 129647    | 48.42 | 771909    | 7.73439 |
| AMSIMNSFVNDIFER          | His2B; | Histone H2B                                                             | 887.419 | 2 | 56.68 | 8868951   | 56.46 | 6505927   | 0.95293 |
| AMSIMNSFVNDIFER          | His2B; | Histone H2B                                                             | 895.416 | 2 | 53.52 | 1479536   | 53.25 | 1206039   | 1.05891 |
| EIQTAVR                  | His2B; | Histone H2B                                                             | 408.732 | 2 | 12.88 | 14773905  | 12.91 | 10649531  | 0.93639 |
| LLLPGELAK                | His2B; | Histone H2B                                                             | 477.305 | 2 | 35.91 | 102778656 | 35.74 | 124503536 | 1.57362 |
| QVHPDTGISSK              | His2B; | Histone H2B                                                             | 584.801 | 2 | 10.81 | 2334514   | 10.96 | 693190    | 0.38573 |
| QVHPDTGISSK              | His2B; | Histone H2B                                                             | 390.203 | 3 | 10.85 | 5805182   | 10.92 | 2011360   | 0.45009 |
| STELLIR                  | His3;  | Histone H3                                                              | 416.25  | 2 | 25.89 | 5173880   | 25.9  | 6235095   | 1.56549 |
| YRPGTVALR                | His3;  | Histone H3                                                              | 516.801 | 2 | 17.48 | 3862821   | 17.48 | 3541424   | 1.19096 |
| LSSPFHAFFHEPPVWSVALPR    | Hsp22  | Heat shock protein 22                                                   | 807.755 | 3 | 53.04 | 54619     | 51.82 | 2099841   | 49.9419 |
| LSSPFHAFFHEPPVWSVALPR    | Hsp22  | Heat shock protein 22                                                   | 606.068 | 4 | 53    | 0         | 51.82 | 4645716   | #DIV/0! |
| NWQQIAR                  | Hsp22  | Heat shock protein 22                                                   | 458.243 | 2 | 20.71 | 432610    | 20.82 | 4241642   | 12.7368 |
| SEQQEAQGGYSSR            | Hsp22  | Heat shock protein 22                                                   | 778.335 | 2 | 9.79  | 28800     | 9.82  | 242324    | 10.9302 |
| SLPMFWR                  | Hsp22  | Heat shock protein 22                                                   | 468.742 | 2 | 39.16 | 14794     | 42.1  | 979169    | 85.9794 |
| VLDESIVLVEGK             | Hsp22  | Heat shock protein 22                                                   | 643.864 | 2 | 32.87 | 228435    | 32.75 | 2015223   | 11.46   |
| WQEQEFAPPATVVK           | Hsp22  | Heat shock protein 22                                                   | 822.904 | 2 | 29.6  | 0         | 29.57 | 700123    | #DIV/0! |
| DGFQVCMDVSHFKPSELVVK     | Hsp23  | Heat shock protein 23                                                   | 774.713 | 3 | 43.1  | 204592    | 43.01 | 339238    | 2.15396 |
| DGFQVCMDVSHFKPSELVVK     | Hsp23  | Heat shock protein 23                                                   | 581.287 | 4 | 43.1  | 402779    | 42.97 | 317497    | 1.02399 |
| DGFQVCMDVSHFKPSELVVK     | Hsp23  | Heat shock protein 23                                                   | 780.045 | 3 | 38.76 | 29062     | 38.74 | 599164    | 26.782  |
| DGFQVCMDVSHFKPSELVVK     | Hsp23  | Heat shock protein 23                                                   | 585.286 | 4 | 38.73 | 18808     | 38.78 | 469777    | 32.4468 |
| IVQIQVGPAPHLNVK          | Hsp23  | Heat shock protein 23                                                   | 822.483 | 2 | 30.45 | 27968     | 30.12 | 3476212   | 161.461 |
| IVQIQVGPAPHLNVK          | Hsp23  | Heat shock protein 23                                                   | 548.658 | 3 | 30.33 | 1113      | 30.08 | 27440434  | 32027.1 |
| MSMVPFYEPYYCQR           | Hsp23  | Heat shock protein 23                                                   | 935.902 | 2 | 43.25 | 0         | 43.16 | 737059    | #DIV/0! |

|                            |         |                                                                          |         |   |       |          |       |          |         |
|----------------------------|---------|--------------------------------------------------------------------------|---------|---|-------|----------|-------|----------|---------|
| MSMVPFYEPYYCQR             | Hsp23   | Heat shock protein 23                                                    | 943.899 | 2 | 39.58 | 18216    | 39.45 | 774858   | 55.2575 |
| MSMVPFYEPYYCQR             | Hsp23   | Heat shock protein 23                                                    | 943.899 | 2 | 37.24 | 37268    | 37.1  | 726973   | 25.3399 |
| MSMVPFYEPYYCQR             | Hsp23   | Heat shock protein 23                                                    | 951.897 | 2 | 34.82 | 0        | 34.71 | 818198   | #DIV/0! |
| NPYLALVGPMEQQLR            | Hsp23   | Heat shock protein 23                                                    | 864.959 | 2 | 46.34 | 474657   | 45.99 | 3156756  | 8.6394  |
| NPYLALVGPMEQQLR            | Hsp23   | Heat shock protein 23                                                    | 576.975 | 3 | 46.1  | 37103    | 45.99 | 888801   | 31.1184 |
| NPYLALVGPMEQQLR            | Hsp23   | Heat shock protein 23                                                    | 872.956 | 2 | 38.21 | 28503    | 37.96 | 3708824  | 169.032 |
| NPYLALVGPMEQQLR            | Hsp23   | Heat shock protein 23                                                    | 582.307 | 3 | 38.46 | 368115   | 37.96 | 1423477  | 5.0233  |
| QVGASSGSSGAVSK             | Hsp23   | Heat shock protein 23                                                    | 611.307 | 2 | 13.12 | 130999   | 8.97  | 467450   | 4.63542 |
| VASTLSSDGVLTIK             | Hsp23   | Heat shock protein 23                                                    | 695.893 | 2 | 33.08 | 0        | 33.09 | 2054661  | #DIV/0! |
| VQDNSVLVEGNHEER            | Hsp23   | Heat shock protein 23                                                    | 575.611 | 3 | 16.47 | 0        | 16.8  | 50272    | #DIV/0! |
| AEQVVSQSSDGVLTVSIPKPQAVE   | Hsp26   | Heat shock protein 26                                                    | 942.169 | 3 | 41.6  | 19465    | 41.36 | 1034803  | 69.0598 |
| DGFQVCMDVAQFKPSELNVK       | Hsp26   | Heat shock protein 26                                                    | 771.373 | 3 | 44.11 | 213799   | 44.1  | 1638807  | 9.95737 |
| DGFQVCMDVAQFKPSELNVK       | Hsp26   | Heat shock protein 26                                                    | 776.705 | 3 | 39.94 | 53212    | 39.69 | 2583608  | 63.0724 |
| IIQIQVQVGAHLNVK            | Hsp26   | Heat shock protein 26                                                    | 829.491 | 2 | 32.72 | 98730    | 32.53 | 9251943  | 121.732 |
| IIQIQVQVGAHLNVK            | Hsp26   | Heat shock protein 26                                                    | 553.33  | 3 | 32.72 | 645047   | 32.53 | 78215392 | 157.515 |
| MSLSTLLSLVDELQEPR          | Hsp26   | Heat shock protein 26                                                    | 644.343 | 3 | 65.46 | 0        | 65.23 | 11197    | #DIV/0! |
| NDIHWPATAHV GK             | Hsp26   | Heat shock protein 26                                                    | 482.581 | 3 | 20.47 | 18499    | 23.18 | 478607   | 33.6088 |
| SPIYELGLGLPHPSR            | Hsp26   | Heat shock protein 26                                                    | 838.449 | 2 | 33.39 | 144972   | 33.4  | 4457974  | 39.9462 |
| SPIYELGLGLPHPSR            | Hsp26   | Heat shock protein 26                                                    | 559.302 | 3 | 33.64 | 373200   | 33.4  | 49626936 | 172.742 |
| SPIYELGLGLPHPSR            | Hsp26   | Heat shock protein 26                                                    | 419.728 | 4 | 33.54 | 257619   | 33.4  | 45925152 | 231.577 |
| VVDDSVLVEGK                | Hsp26   | Heat shock protein 26                                                    | 587.322 | 2 | 27.24 | 288145   | 27.53 | 4657387  | 20.9968 |
| VYVPLGTQQR                 | Hsp26   | Heat shock protein 26                                                    | 587.833 | 2 | 30.91 | 472461   | 30.72 | 95333624 | 262.121 |
| ASGGPNALLPAVGK             | Hsp27   | Heat shock protein 27                                                    | 626.356 | 2 | 31.22 | 28381    | 31.28 | 8197708  | 375.221 |
| DGFQVCMDVSVQFKPNELTVK      | Hsp27   | Heat shock protein 27                                                    | 781.377 | 3 | 43.41 | 309810   | 43.2  | 1758866  | 7.37496 |
| DGFQVCMDVSVQFKPNELTVK      | Hsp27   | Heat shock protein 27                                                    | 786.708 | 3 | 39.05 | 29103    | 38.58 | 4310963  | 192.424 |
| ELDHDYR                    | Hsp27   | Heat shock protein 27                                                    | 474.215 | 2 | 10.24 | 25905    | 10.22 | 309944   | 15.5425 |
| GFDPNEVVSTVSSDGVLT LK      | Hsp27   | Heat shock protein 27                                                    | 1032.53 | 2 | 49.31 | 578434   | 48.23 | 34145948 | 76.6845 |
| GFDPNEVVSTVSSDGVLT LK      | Hsp27   | Heat shock protein 27                                                    | 688.688 | 3 | 49.28 | 243916   | 48.23 | 17596958 | 93.7173 |
| IVQIQQTGPAHLSVK            | Hsp27   | Heat shock protein 27                                                    | 809.967 | 2 | 26.16 | 0        | 26.15 | 7420055  | #DIV/0! |
| IVQIQQTGPAHLSVK            | Hsp27   | Heat shock protein 27                                                    | 540.314 | 3 | 26.32 | 125560   | 26.23 | 62417060 | 645.765 |
| LLLPLTLGLGR                | Hsp27   | Heat shock protein 27                                                    | 583.866 | 2 | 42.95 | 0        | 42.98 | 26755810 | #DIV/0! |
| MSIIPLLHLAR                | Hsp27   | Heat shock protein 27                                                    | 653.389 | 2 | 60.18 | 0        | 59.42 | 2492957  | #DIV/0! |
| VVDNTVVVEGK                | Hsp27   | Heat shock protein 27                                                    | 579.822 | 2 | 18.32 | 82265    | 18.27 | 3377383  | 53.332  |
| AGFAGDDAPR                 | Act42A  | Actin-42A                                                                | 488.728 | 2 | 15.06 | 5346544  | 15.03 | 6072874  | 1.47551 |
| AVFPSIVGRPR                | Act42A  | Actin-42A                                                                | 599.856 | 2 | 30.18 | 3527039  | 29.97 | 6233553  | 2.29587 |
| DSYVGEAQSK                 | Act42A  | Actin-42A                                                                | 599.765 | 2 | 11.94 | 533801   | 12.02 | 513658   | 1.25002 |
| IWHHTFYNELR                | Act42A  | Actin-42A                                                                | 505.921 | 3 | 25.48 | 1669489  | 25.49 | 2792816  | 2.17311 |
| SYELPDGQVITIGNER           | Act42A  | Actin-42A                                                                | 895.95  | 2 | 39.17 | 5791673  | 39    | 8517636  | 1.91046 |
| SYELPDGQVITIGNER           | Act42A  | Actin-42A                                                                | 597.635 | 3 | 39.17 | 427938   | 38.97 | 800279   | 2.42931 |
| TTGIVLDSGDGVSHTVPIYEGYALPI | Act42A  | Actin-42A                                                                | 1051.22 | 3 | 45.78 | 1749429  | 45.58 | 1016220  | 0.75459 |
| VAPEEHPVLLTEAPLNPK         | Act42A  | Actin-42A                                                                | 977.536 | 2 | 34.25 | 620752   | 34.11 | 748708   | 1.56681 |
| VAPEEHPVLLTEAPLNPK         | Act42A  | Actin-42A                                                                | 652.026 | 3 | 34.21 | 12031327 | 34.11 | 16999678 | 1.83548 |
| AGFAGDDAPR                 | Act79B  | Actin, larval muscle (Actin-79B)                                         | 488.728 | 2 | 15.06 | 5346544  | 15.03 | 6072874  | 1.47551 |
| AVFPSIVGRPR                | Act79B  | Actin, larval muscle (Actin-79B)                                         | 599.856 | 2 | 30.18 | 3527039  | 29.97 | 6233553  | 2.29587 |
| SYELPDGQVITIGNER           | Act79B  | Actin, larval muscle (Actin-79B)                                         | 895.95  | 2 | 39.17 | 5791673  | 39    | 8517636  | 1.91046 |
| SYELPDGQVITIGNER           | Act79B  | Actin, larval muscle (Actin-79B)                                         | 597.635 | 3 | 39.17 | 427938   | 38.97 | 800279   | 2.42931 |
| TTGIVLDSGDGVSHTVPIYEGYALPI | Act79B  | Actin, larval muscle (Actin-79B)                                         | 1051.22 | 3 | 45.78 | 1749429  | 45.58 | 1016220  | 0.75459 |
| VAPEEHPVLLTEAPLNPK         | Act79B  | Actin, larval muscle (Actin-79B)                                         | 977.536 | 2 | 34.25 | 620752   | 34.11 | 748708   | 1.56681 |
| VAPEEHPVLLTEAPLNPK         | Act79B  | Actin, larval muscle (Actin-79B)                                         | 652.026 | 3 | 34.21 | 12031327 | 34.11 | 16999678 | 1.83548 |
| DAGHIAGLNVL R              | Hsp70Ab | Major heat shock 70 kDa protein Ab (Heat shock protein 70Ab) (HSP70-87A7 | 618.346 | 2 | 31.67 | 40614    | 31.54 | 13040718 | 417.108 |
| DAGHIAGLNVL R              | Hsp70Ab | Major heat shock 70 kDa protein Ab (Heat shock protein 70Ab) (HSP70-87A7 | 412.567 | 3 | 31.59 | 26572    | 31.54 | 33980956 | 1661.24 |
| DNNALGTFDLSGIPPAPR         | Hsp70Ab | Major heat shock 70 kDa protein Ab (Heat shock protein 70Ab) (HSP70-87A7 | 927.971 | 2 | 45.07 | 166587   | 43.39 | 30976200 | 241.551 |
| DNNALGTFDLSGIPPAPR         | Hsp70Ab | Major heat shock 70 kDa protein Ab (Heat shock protein 70Ab) (HSP70-87A7 | 618.983 | 3 | 45.21 | 24051    | 43.65 | 6711729  | 362.513 |

|                             |          |                                                                           |         |   |       |          |       |          |         |
|-----------------------------|----------|---------------------------------------------------------------------------|---------|---|-------|----------|-------|----------|---------|
| ETA EAYLGESITDAVITVPAYFNDSC | Hsp70Ab  | Major heat shock 70 kDa protein Ab (Heat shock protein 70Ab) (HSP70-87A7) | 987.477 | 3 | 58.6  | 304104   | 58.36 | 1308713  | 5.59042 |
| FAPEEISSMVLTK               | Hsp70Ab  | Major heat shock 70 kDa protein Ab (Heat shock protein 70Ab) (HSP70-87A7) | 726.376 | 2 | 41.77 | 22231    | 41.79 | 11132469 | 650.511 |
| FAPEEISSMVLTK               | Hsp70Ab  | Major heat shock 70 kDa protein Ab (Heat shock protein 70Ab) (HSP70-87A7) | 484.587 | 3 | 41.77 | 0        | 41.79 | 276280   | #DIV/0! |
| FAPEEISSMVLTK               | Hsp70Ab  | Major heat shock 70 kDa protein Ab (Heat shock protein 70Ab) (HSP70-87A7) | 734.374 | 2 | 35.12 | 297494   | 34.86 | 2047640  | 8.94124 |
| FEELCADLFR                  | Hsp70Ab  | Major heat shock 70 kDa protein Ab (Heat shock protein 70Ab) (HSP70-87A7) | 650.306 | 2 | 41.55 | 32123    | 41.36 | 4667637  | 188.757 |
| GQIHDIIVLVGGSTR             | Hsp70Ab  | Major heat shock 70 kDa protein Ab (Heat shock protein 70Ab) (HSP70-87A7) | 726.402 | 2 | 27.66 | 141880   | 27.58 | 2013950  | 18.4395 |
| GQIHDIIVLVGGSTR             | Hsp70Ab  | Major heat shock 70 kDa protein Ab (Heat shock protein 70Ab) (HSP70-87A7) | 484.604 | 3 | 27.43 | 42940    | 27.54 | 4848927  | 146.692 |
| HCSPIMTK                    | Hsp70Ab  | Major heat shock 70 kDa protein Ab (Heat shock protein 70Ab) (HSP70-87A7) | 487.233 | 2 | 11.2  | 35165    | 11.25 | 2786296  | 102.929 |
| HCSPIMTK                    | Hsp70Ab  | Major heat shock 70 kDa protein Ab (Heat shock protein 70Ab) (HSP70-87A7) | 495.231 | 2 | 9.26  | 11777    | 9.24  | 218205   | 24.0687 |
| IQDVLLVDVAPLSLGIETAGGVMTK   | Hsp70Ab  | Major heat shock 70 kDa protein Ab (Heat shock protein 70Ab) (HSP70-87A7) | 1270.21 | 2 | 61.32 | 0        | 61.17 | 571901   | #DIV/0! |
| IQDVLLVDVAPLSLGIETAGGVMTK   | Hsp70Ab  | Major heat shock 70 kDa protein Ab (Heat shock protein 70Ab) (HSP70-87A7) | 847.14  | 3 | 61.32 | 519      | 61.21 | 3335041  | 8347.49 |
| IQDVLLVDVAPLSLGIETAGGVMTK   | Hsp70Ab  | Major heat shock 70 kDa protein Ab (Heat shock protein 70Ab) (HSP70-87A7) | 852.472 | 3 | 57.66 | 0        | 57.38 | 359486   | #DIV/0! |
| LSQAEIDR                    | Hsp70Ab  | Major heat shock 70 kDa protein Ab (Heat shock protein 70Ab) (HSP70-87A7) | 466.246 | 2 | 14.26 | 24538    | 14.28 | 4887219  | 258.729 |
| NALESYFNVK                  | Hsp70Ab  | Major heat shock 70 kDa protein Ab (Heat shock protein 70Ab) (HSP70-87A7) | 642.335 | 2 | 40.6  | 35451    | 38.81 | 48323708 | 1770.74 |
| NLNLSINPDEAVAYGAAVQAAILSGI  | Hsp70Ab  | Major heat shock 70 kDa protein Ab (Heat shock protein 70Ab) (HSP70-87A7) | 1493.76 | 2 | 58.87 | 44314    | 57.77 | 661805   | 19.4004 |
| NLNLSINPDEAVAYGAAVQAAILSGI  | Hsp70Ab  | Major heat shock 70 kDa protein Ab (Heat shock protein 70Ab) (HSP70-87A7) | 996.175 | 3 | 58.34 | 121646   | 57.81 | 3315510  | 35.4058 |
| NQVAMNPR                    | Hsp70Ab  | Major heat shock 70 kDa protein Ab (Heat shock protein 70Ab) (HSP70-87A7) | 465.235 | 2 | 11.74 | 204889   | 11.84 | 365105   | 2.31484 |
| STAGDTHLGGEDFDNR            | Hsp70Ab  | Major heat shock 70 kDa protein Ab (Heat shock protein 70Ab) (HSP70-87A7) | 846.366 | 2 | 18.67 | 1657789  | 18.65 | 1831600  | 1.43524 |
| STAGDTHLGGEDFDNR            | Hsp70Ab  | Major heat shock 70 kDa protein Ab (Heat shock protein 70Ab) (HSP70-87A7) | 564.58  | 3 | 18.67 | 10781481 | 18.68 | 14815577 | 1.7851  |
| TFSTYADNQPGVSIQVYEGER       | Hsp70Ab  | Major heat shock 70 kDa protein Ab (Heat shock protein 70Ab) (HSP70-87A7) | 787.705 | 3 | 34.9  | 43097    | 34.9  | 7443709  | 224.37  |
| TLSSSTEATIEIDALFEGQDFYTK    | Hsp70Ab  | Major heat shock 70 kDa protein Ab (Heat shock protein 70Ab) (HSP70-87A7) | 1333.64 | 2 | 55.81 | 30514    | 54.36 | 4199024  | 178.76  |
| TLSSSTEATIEIDALFEGQDFYTK    | Hsp70Ab  | Major heat shock 70 kDa protein Ab (Heat shock protein 70Ab) (HSP70-87A7) | 889.429 | 3 | 55.66 | 365012   | 54.36 | 14991373 | 53.3527 |
| TTPSYVAFTDSE                | Hsp70Ab  | Major heat shock 70 kDa protein Ab (Heat shock protein 70Ab) (HSP70-87A7) | 737.346 | 2 | 28.48 | 159128   | 28.32 | 60403172 | 493.101 |
| TTPSYVAFTDSE                | Hsp70Ab  | Major heat shock 70 kDa protein Ab (Heat shock protein 70Ab) (HSP70-87A7) | 491.9   | 3 | 28.44 | 0        | 28.4  | 323797   | #DIV/0! |
| VEIANDQGNR                  | Hsp70Ab  | Major heat shock 70 kDa protein Ab (Heat shock protein 70Ab) (HSP70-87A7) | 614.818 | 2 | 18.24 | 20421124 | 18.27 | 30231408 | 1.9231  |
| VQSLLQDFFHGK                | Hsp70Ab  | Major heat shock 70 kDa protein Ab (Heat shock protein 70Ab) (HSP70-87A7) | 709.875 | 2 | 45.25 | 30856    | 45.28 | 4190765  | 176.431 |
| VQSLLQDFFHGK                | Hsp70Ab  | Major heat shock 70 kDa protein Ab (Heat shock protein 70Ab) (HSP70-87A7) | 473.586 | 3 | 45.21 | 0        | 45.24 | 14899044 | #DIV/0! |
| ALLFIPR                     | Hsp83    | Heat shock protein 83 (HSP 82)                                            | 415.268 | 2 | 39.76 | 1322147  | 39.6  | 1321862  | 1.29876 |
| FHTSASGDDFCSLADYVSR         | Hsp83    | Heat shock protein 83 (HSP 82)                                            | 712.309 | 3 | 37.38 | 903559   | 37.17 | 836957   | 1.20329 |
| HFSVEGQLEFR                 | Hsp83    | Heat shock protein 83 (HSP 82)                                            | 674.836 | 2 | 31.64 | 477696   | 31.52 | 426943   | 1.16102 |
| HFSVEGQLEFR                 | Hsp83    | Heat shock protein 83 (HSP 82)                                            | 450.226 | 3 | 31.72 | 303941   | 31.52 | 380731   | 1.62724 |
| IGGIGTVPVGR                 | eEF1alph | Elongation factor 1-alpha 2 (EF-1-alpha-2)                                | 513.309 | 2 | 26.78 | 8471779  | 26.71 | 7294916  | 1.11858 |
| IHINIVVIGHVDSGK             | eEF1alph | Elongation factor 1-alpha 2 (EF-1-alpha-2)                                | 534.311 | 3 | 34.63 | 1881392  | 34.42 | 1040176  | 0.71821 |
| LPLQDVYK                    | eEF1alph | Elongation factor 1-alpha 2 (EF-1-alpha-2)                                | 488.279 | 2 | 28.46 | 1429878  | 28.37 | 739398   | 0.67174 |
| STTTGHLIYK                  | eEF1alph | Elongation factor 1-alpha 2 (EF-1-alpha-2)                                | 560.803 | 2 | 15.84 | 2355586  | 15.79 | 1523568  | 0.8402  |
| ALDSMQASLEAEAK              | Mhc      | Myosin heavy chain, muscle                                                | 732.356 | 2 | 29.64 | 321135   | 29.49 | 790332   | 3.19701 |
| ALDSMQASLEAEAK              | Mhc      | Myosin heavy chain, muscle                                                | 740.353 | 2 | 21.04 | 48359    | 20.88 | 260236   | 6.99057 |
| DLEEANIQUESTLANLR           | Mhc      | Myosin heavy chain, muscle                                                | 651.661 | 3 | 31.08 | 667254   | 31    | 1249882  | 2.43333 |
| GALQDYQER                   | Mhc      | Myosin heavy chain, muscle                                                | 540.259 | 2 | 15.57 | 503772   | 15.55 | 1324414  | 3.41517 |
| IEEEVEAEER                  | Mhc      | Myosin heavy chain, muscle                                                | 737.849 | 2 | 27.66 | 871072   | 27.57 | 2436877  | 3.63414 |
| LAEAEETIESLNQK              | Mhc      | Myosin heavy chain, muscle                                                | 787.899 | 2 | 29.52 | 307761   | 29.44 | 1119309  | 4.72453 |
| LAGADIETYLLEK               | Mhc      | Myosin heavy chain, muscle                                                | 718.388 | 2 | 42.99 | 649408   | 42.76 | 1212276  | 2.42497 |
| LTQEAVADLER                 | Mhc      | Myosin heavy chain, muscle                                                | 622.828 | 2 | 25.2  | 753282   | 25.18 | 1645891  | 2.83835 |
| NYSTELFR                    | Mhc      | Myosin heavy chain, muscle                                                | 515.254 | 2 | 28.61 | 584482   | 28.59 | 1201453  | 2.67029 |
| QIEEAEI AALNLAK             | Mhc      | Myosin heavy chain, muscle                                                | 821.438 | 2 | 39.84 | 244676   | 39.61 | 641209   | 3.40432 |
| QLEEAESQVSQLSK              | Mhc      | Myosin heavy chain, muscle                                                | 788.397 | 2 | 24.66 | 238416   | 24.6  | 763584   | 4.16048 |
| TALLDLSLGEK                 | Mhc      | Myosin heavy chain, muscle                                                | 567.306 | 2 | 31.71 | 635833   | 31.55 | 1551318  | 3.16942 |
| TLLEQADR                    | Mhc      | Myosin heavy chain, muscle                                                | 473.254 | 2 | 18.74 | 809820   | 18.73 | 1724785  | 2.76674 |
| VIAYFATVGASK                | Mhc      | Myosin heavy chain, muscle                                                | 613.843 | 2 | 33.65 | 620379   | 33.48 | 1435185  | 3.0052  |
| AVCMLSNTTAAIEAWAR           | alphaTub | Tubulin alpha-1 chain                                                     | 940.953 | 2 | 39.84 | 709606   | 39.65 | 489135   | 0.89543 |
| AVFVDLEPTVVDEVR             | alphaTub | Tubulin alpha-1 chain                                                     | 844.449 | 2 | 44.89 | 13338792 | 44.71 | 10363053 | 1.00924 |
| AVFVDLEPTVVDEVR             | alphaTub | Tubulin alpha-1 chain                                                     | 563.302 | 3 | 44.92 | 3137291  | 44.67 | 2222947  | 0.92044 |
| DVNAAIATIK                  | alphaTub | Tubulin alpha-1 chain                                                     | 508.293 | 2 | 27.73 | 3407066  | 27.65 | 2606071  | 0.99364 |



|                           |          |                                                                             |         |   |       |          |       |           |         |
|---------------------------|----------|-----------------------------------------------------------------------------|---------|---|-------|----------|-------|-----------|---------|
| FDGALNVDLTFQTNLVPYPR      | alphaTub | Tubulin alpha-1 chain                                                       | 1205.11 | 2 | 53.41 | 332260   | 53.09 | 0         | 0       |
| IHFPLVTYAPVISA EK         | alphaTub | Tubulin alpha-1 chain                                                       | 595.67  | 3 | 44.88 | 6502554  | 44.74 | 4535771   | 0.90613 |
| LIGQIVSSITASLR            | alphaTub | Tubulin alpha-1 chain                                                       | 729.438 | 2 | 53.27 | 1768446  | 53.14 | 157727    | 0.11586 |
| TIQFVDWCPTGFK             | alphaTub | Tubulin alpha-1 chain                                                       | 799.887 | 2 | 45.66 | 2155301  | 45.43 | 964521    | 0.58133 |
| TVGGGDDSFNTFFSETGAGK      | alphaTub | Tubulin alpha-1 chain                                                       | 997.442 | 2 | 40.1  | 757733   | 39.88 | 250306    | 0.42912 |
| VGINYQPPTVVPGGDLAK        | alphaTub | Tubulin alpha-1 chain                                                       | 912.996 | 2 | 36.97 | 4567866  | 36.76 | 2064425   | 0.58709 |
| AVCMLSNTTAIAEAWAR         | alphaTub | Tubulin alpha-2 chain                                                       | 940.953 | 2 | 39.84 | 709606   | 39.65 | 489135    | 0.89543 |
| AVFVDLEPTVVDEVR           | alphaTub | Tubulin alpha-2 chain                                                       | 844.449 | 2 | 44.89 | 13338792 | 44.71 | 10363053  | 1.00924 |
| AVFVDLEPTVVDEVR           | alphaTub | Tubulin alpha-2 chain                                                       | 563.302 | 3 | 44.92 | 3137291  | 44.67 | 2222947   | 0.92044 |
| DVNAAIATIK                | alphaTub | Tubulin alpha-2 chain                                                       | 508.293 | 2 | 27.73 | 3407066  | 27.65 | 2606071   | 0.99364 |
| FDGALNVDLTFQTNLVPYPR      | alphaTub | Tubulin alpha-2 chain                                                       | 1205.11 | 2 | 53.41 | 332260   | 53.09 | 0         | 0       |
| LIGQIVSSITASLR            | alphaTub | Tubulin alpha-2 chain                                                       | 729.438 | 2 | 53.27 | 1768446  | 53.14 | 157727    | 0.11586 |
| VGINYQPPTVVPGGDLAK        | alphaTub | Tubulin alpha-2 chain                                                       | 912.996 | 2 | 36.97 | 4567866  | 36.76 | 2064425   | 0.58709 |
| AVCMLSNTTAIAEAWAR         | alphaTub | Tubulin alpha-3 chain                                                       | 940.953 | 2 | 39.84 | 709606   | 39.65 | 489135    | 0.89543 |
| AVFVDLEPTVVDEVR           | alphaTub | Tubulin alpha-3 chain                                                       | 844.449 | 2 | 44.89 | 13338792 | 44.71 | 10363053  | 1.00924 |
| AVFVDLEPTVVDEVR           | alphaTub | Tubulin alpha-3 chain                                                       | 563.302 | 3 | 44.92 | 3137291  | 44.67 | 2222947   | 0.92044 |
| DVNAAIATIK                | alphaTub | Tubulin alpha-3 chain                                                       | 508.293 | 2 | 27.73 | 3407066  | 27.65 | 2606071   | 0.99364 |
| FDGALNVDLTFQTNLVPYPR      | alphaTub | Tubulin alpha-3 chain                                                       | 1205.11 | 2 | 53.41 | 332260   | 53.09 | 0         | 0       |
| IHFPLVTYAPVISA EK         | alphaTub | Tubulin alpha-3 chain                                                       | 595.67  | 3 | 44.88 | 6502554  | 44.74 | 4535771   | 0.90613 |
| LIGQIVSSITASLR            | alphaTub | Tubulin alpha-3 chain                                                       | 729.438 | 2 | 53.27 | 1768446  | 53.14 | 157727    | 0.11586 |
| TIQFVDWCPTGFK             | alphaTub | Tubulin alpha-3 chain                                                       | 799.887 | 2 | 45.66 | 2155301  | 45.43 | 964521    | 0.58133 |
| TVGGGDDSFNTFFSETGAGK      | alphaTub | Tubulin alpha-3 chain                                                       | 997.442 | 2 | 40.1  | 757733   | 39.88 | 250306    | 0.42912 |
| VGINYQPPTVVPGGDLAK        | alphaTub | Tubulin alpha-3 chain                                                       | 912.996 | 2 | 36.97 | 4567866  | 36.76 | 2064425   | 0.58709 |
| AQPGFGEDEVITVLTGLPK       | Yp3      | Vitellogenin-3 (Vitellogenin III) (Yolk protein 3)                          | 986.025 | 2 | 50.78 | 511312   | 50.51 | 698432    | 1.77444 |
| YFAESVRPGSER              | Yp3      | Vitellogenin-3 (Vitellogenin III) (Yolk protein 3)                          | 466.565 | 3 | 18.27 | 878476   | 18.27 | 1290612   | 1.90848 |
| ALNLNPTLALIEK             | Mlc1     | Myosin light chain alkali                                                   | 705.422 | 2 | 45.94 | 2478744  | 45.73 | 4382358   | 2.29667 |
| LSEASQAADER               | Tm1      | Tropomyosin-1, isoforms 9A/A/B (Cytoskeletal tropomyosin) (Tropomyosin II)  | 696.816 | 2 | 11.57 | 343010   | 11.67 | 695696    | 2.63472 |
| VINDNFEIVEGLMTTVHATTATQK  | Gapdh1   | Glyceraldehyde-3-phosphate dehydrogenase 1 (EC 1.2.1.12) (Glyceraldehyde    | 883.446 | 3 | 44.43 | 15660984 | 44.21 | 14722617  | 1.2212  |
| VPTPNVSVVDLTVR            | Gapdh1   | Glyceraldehyde-3-phosphate dehydrogenase 1 (EC 1.2.1.12) (Glyceraldehyde    | 748.428 | 2 | 39.69 | 2420706  | 39.45 | 1346589   | 0.72263 |
| GAAQNIIPASTGAAK           | Gapdh2   | Glyceraldehyde-3-phosphate dehydrogenase 2 (EC 1.2.1.12) (Glyceraldehyde    | 685.375 | 2 | 22.79 | 1294864  | 22.83 | 1032530   | 1.03586 |
| VINDNFEIVEGLMTTVHATTATQK  | Gapdh2   | Glyceraldehyde-3-phosphate dehydrogenase 2 (EC 1.2.1.12) (Glyceraldehyde    | 883.446 | 3 | 44.43 | 15660984 | 44.21 | 14722617  | 1.2212  |
| VPTPNVSVVDLTVR            | Gapdh2   | Glyceraldehyde-3-phosphate dehydrogenase 2 (EC 1.2.1.12) (Glyceraldehyde    | 748.428 | 2 | 39.69 | 2420706  | 39.45 | 1346589   | 0.72263 |
| ALQASVLR                  | Ald1     | Fructose-bisphosphate aldolase (EC 4.1.2.13)                                | 429.264 | 2 | 22.24 | 109791   | 22.21 | 356378    | 4.21664 |
| IGGIGTVPVGR               | eEF1alph | Elongation factor 1-alpha 1 (EF-1-alpha-1) (50 kDa female-specific protein) | 513.309 | 2 | 26.78 | 8471779  | 26.71 | 7294916   | 1.11858 |
| IHINIVVIGHVDSGK           | eEF1alph | Elongation factor 1-alpha 1 (EF-1-alpha-1) (50 kDa female-specific protein) | 534.311 | 3 | 34.63 | 1881392  | 34.42 | 1040176   | 0.71821 |
| LPLQDVYK                  | eEF1alph | Elongation factor 1-alpha 1 (EF-1-alpha-1) (50 kDa female-specific protein) | 488.279 | 2 | 28.46 | 1429878  | 28.37 | 739398    | 0.67174 |
| SGDAAIVNLVPSKPLCVEAFQEFPP | eEF1alph | Elongation factor 1-alpha 1 (EF-1-alpha-1) (50 kDa female-specific protein) | 1004.53 | 3 | 53.37 | 2199775  | 53.17 | 2605591   | 1.53869 |
| STTTGHLIYK                | eEF1alph | Elongation factor 1-alpha 1 (EF-1-alpha-1) (50 kDa female-specific protein) | 560.803 | 2 | 15.84 | 2355586  | 15.79 | 1523568   | 0.8402  |
| TLIDALDAILPPARPTDK        | eEF1alph | Elongation factor 1-alpha 1 (EF-1-alpha-1) (50 kDa female-specific protein) | 640.698 | 3 | 53.52 | 4586012  | 53.29 | 3427460   | 0.97087 |
| VTDGVLKPGTVVVVFAPANITTEVK | eEF1alph | Elongation factor 1-alpha 1 (EF-1-alpha-1) (50 kDa female-specific protein) | 823.804 | 3 | 44.29 | 5606537  | 44.1  | 4779433   | 1.1074  |
| ALTVPELTQQMFDAK           | betaTub6 | Tubulin beta-3 chain (Beta-3-tubulin)                                       | 854.435 | 2 | 37.81 | 1590296  | 37.56 | 1317924   | 1.07655 |
| IMNTYSVVPSPK              | betaTub6 | Tubulin beta-3 chain (Beta-3-tubulin)                                       | 668.352 | 2 | 29.06 | 1095355  | 28.94 | 858780    | 1.01847 |
| LAVNMVFPFR                | betaTub6 | Tubulin beta-3 chain (Beta-3-tubulin)                                       | 572.321 | 2 | 40.41 | 1793279  | 40.19 | 932227    | 0.6753  |
| LAVNMVFPFR                | betaTub6 | Tubulin beta-3 chain (Beta-3-tubulin)                                       | 580.318 | 2 | 34.29 | 768535   | 34.41 | 1250344   | 2.11343 |
| LHFFMPGFAPLTSR            | betaTub6 | Tubulin beta-3 chain (Beta-3-tubulin)                                       | 540.95  | 3 | 48.83 | 2785496  | 48.88 | 1571753   | 0.733   |
| LHFFMPGFAPLTSR            | betaTub6 | Tubulin beta-3 chain (Beta-3-tubulin)                                       | 546.282 | 3 | 42.62 | 1500055  | 42.47 | 820442    | 0.7105  |
| NSSYFVEWIPNNVK            | betaTub6 | Tubulin beta-3 chain (Beta-3-tubulin)                                       | 848.92  | 2 | 44.43 | 6003407  | 44.1  | 632379    | 0.13684 |
| IVSQTSSSR                 | Lam      | Lamin Dm0                                                                   | 551.286 | 2 | 7     | 45019    | 6.94  | 21557     | 0.62203 |
| LATYIDR                   | Lam      | Lamin Dm0                                                                   | 426.235 | 2 | 19.41 | 565173   | 19.45 | 354186    | 0.81409 |
| LNITPATNTATVQSFSQSLR      | Lam      | Lamin Dm0                                                                   | 717.046 | 3 | 39.95 | 713399   | 39.69 | 972294    | 1.77047 |
| TILLNSEGEAVANLDR          | Lam      | Lamin Dm0                                                                   | 857.952 | 2 | 36.67 | 1134982  | 36.48 | 1426663   | 1.63288 |
| AGLQFPVGR                 | His2Av   | Histone H2A.v (H2A.F/Z) (H2A.Z)                                             | 472.769 | 2 | 31.56 | 98633592 | 31.42 | 106838928 | 1.40711 |
| ATIAGGGVPIHIHK            | His2Av   | Histone H2A.v (H2A.F/Z) (H2A.Z)                                             | 685.899 | 2 | 24.2  | 4969387  | 24.16 | 4711632   | 1.23166 |



|                           |                                                                       |         |   |       |          |       |          |         |
|---------------------------|-----------------------------------------------------------------------|---------|---|-------|----------|-------|----------|---------|
| TLSDYNIQK                 | Ubi-p63E Polyubiquitin [Cleaved into: Ubiquitin]                      | 541.28  | 2 | 19.53 | 19914654 | 19.52 | 7860957  | 0.51277 |
| TLSDYNIQK                 | Ubi-p63E Polyubiquitin [Cleaved into: Ubiquitin]                      | 541.28  | 2 | 19.53 | 19914654 | 19.52 | 7860957  | 0.51277 |
| TLSDYNIQK                 | Ubi-p63E Polyubiquitin [Cleaved into: Ubiquitin]                      | 541.28  | 2 | 19.53 | 19914654 | 19.52 | 7860957  | 0.51277 |
| TLSDYNIQK                 | Ubi-p63E Polyubiquitin [Cleaved into: Ubiquitin]                      | 541.28  | 2 | 19.53 | 19914654 | 19.52 | 7860957  | 0.51277 |
| TLSDYNIQK                 | Ubi-p63E Polyubiquitin [Cleaved into: Ubiquitin]                      | 541.28  | 2 | 19.53 | 19914654 | 19.52 | 7860957  | 0.51277 |
| AAIELNR                   | ninaC Neither inactivation nor afterpotential protein C (EC 2.7.11.1) | 393.727 | 2 | 17.87 | 27934492 | 17.87 | 8147882  | 0.3789  |
| ADLEYKPR                  | ninaC Neither inactivation nor afterpotential protein C (EC 2.7.11.1) | 496.264 | 2 | 14.09 | 8517788  | 14.09 | 3261920  | 0.49747 |
| ADVWALGITTIELADGKPPFADMHP | ninaC Neither inactivation nor afterpotential protein C (EC 2.7.11.1) | 974.832 | 3 | 55.59 | 2262995  | 55.61 | 1325024  | 0.76061 |
| ADVWALGITTIELADGKPPFADMHP | ninaC Neither inactivation nor afterpotential protein C (EC 2.7.11.1) | 731.376 | 4 | 55.55 | 5864969  | 55.61 | 3224204  | 0.71413 |
| ADVWALGITTIELADGKPPFADMHP | ninaC Neither inactivation nor afterpotential protein C (EC 2.7.11.1) | 980.164 | 3 | 53.25 | 2367700  | 53.26 | 1572627  | 0.86282 |
| ADVWALGITTIELADGKPPFADMHP | ninaC Neither inactivation nor afterpotential protein C (EC 2.7.11.1) | 735.375 | 4 | 53.22 | 7293140  | 53.22 | 4530989  | 0.80705 |
| AFTDINR                   | ninaC Neither inactivation nor afterpotential protein C (EC 2.7.11.1) | 418.717 | 2 | 17.64 | 9521909  | 17.64 | 2491073  | 0.33985 |
| AILMLVNAGTPVNDSTR         | ninaC Neither inactivation nor afterpotential protein C (EC 2.7.11.1) | 943.494 | 2 | 39.58 | 4360804  | 39.35 | 1237694  | 0.3687  |
| AILMLVNAGTPVNDSTR         | ninaC Neither inactivation nor afterpotential protein C (EC 2.7.11.1) | 629.332 | 3 | 39.61 | 1175945  | 39.7  | 524491   | 0.57939 |
| ALGVLDTVIAR               | ninaC Neither inactivation nor afterpotential protein C (EC 2.7.11.1) | 564.343 | 2 | 40.21 | 85712096 | 40.04 | 54023652 | 0.81877 |
| AMFQIIR                   | ninaC Neither inactivation nor afterpotential protein C (EC 2.7.11.1) | 439.749 | 2 | 35.65 | 17816182 | 35.48 | 11806378 | 0.86084 |
| AVFGDTNIIHDMFGFEFCFNR     | ninaC Neither inactivation nor afterpotential protein C (EC 2.7.11.1) | 858.735 | 3 | 55.9  | 3358748  | 55.78 | 1202619  | 0.46513 |
| CVLQYCLTFGK               | ninaC Neither inactivation nor afterpotential protein C (EC 2.7.11.1) | 694.839 | 2 | 38.91 | 1761165  | 38.62 | 991756   | 0.73152 |
| DAVASTLYSR                | ninaC Neither inactivation nor afterpotential protein C (EC 2.7.11.1) | 541.777 | 2 | 22.04 | 13835789 | 22.06 | 3379994  | 0.31735 |
| DDPEGNVER                 | ninaC Neither inactivation nor afterpotential protein C (EC 2.7.11.1) | 515.725 | 2 | 9.74  | 412063   | 9.86  | 43490    | 0.1371  |
| DYCDHPNLPEFYGVYK          | ninaC Neither inactivation nor afterpotential protein C (EC 2.7.11.1) | 1008.94 | 2 | 37.72 | 913930   | 37.56 | 316723   | 0.45018 |
| DYCDHPNLPEFYGVYK          | ninaC Neither inactivation nor afterpotential protein C (EC 2.7.11.1) | 672.965 | 3 | 37.72 | 4680463  | 37.56 | 1886732  | 0.52365 |
| EQACQTNWDR                | ninaC Neither inactivation nor afterpotential protein C (EC 2.7.11.1) | 654.275 | 2 | 14.22 | 2326577  | 14.16 | 675773   | 0.37732 |
| EVNSSQLGPLPVIK            | ninaC Neither inactivation nor afterpotential protein C (EC 2.7.11.1) | 789.449 | 2 | 40.14 | 11621809 | 39.92 | 4206333  | 0.47017 |
| FQDFVNLSQQVHIYNQR         | ninaC Neither inactivation nor afterpotential protein C (EC 2.7.11.1) | 1068.53 | 2 | 39.17 | 2051933  | 39.04 | 701782   | 0.44428 |
| FQDFVNLSQQVHIYNQR         | ninaC Neither inactivation nor afterpotential protein C (EC 2.7.11.1) | 712.692 | 3 | 39.2  | 37242856 | 39    | 15147834 | 0.52836 |
| FTCLTLK                   | ninaC Neither inactivation nor afterpotential protein C (EC 2.7.11.1) | 498.283 | 2 | 37.02 | 3865875  | 36.79 | 785519   | 0.26396 |
| GDNILLTK                  | ninaC Neither inactivation nor afterpotential protein C (EC 2.7.11.1) | 437.256 | 2 | 23.96 | 7840105  | 24.03 | 3269877  | 0.54179 |
| GSDSGDQHTFQPPK            | ninaC Neither inactivation nor afterpotential protein C (EC 2.7.11.1) | 750.839 | 2 | 15.01 | 635465   | 15.09 | 79069    | 0.16164 |
| GSDSGDQHTFQPPK            | ninaC Neither inactivation nor afterpotential protein C (EC 2.7.11.1) | 500.895 | 3 | 15.01 | 4659666  | 14.99 | 900055   | 0.25092 |
| GSETNTYDFNRR              | ninaC Neither inactivation nor afterpotential protein C (EC 2.7.11.1) | 709.303 | 2 | 17.48 | 9864913  | 17.48 | 4245090  | 0.55901 |
| GYAAPPPPPMPSSNYR          | ninaC Neither inactivation nor afterpotential protein C (EC 2.7.11.1) | 1037.99 | 2 | 26.91 | 1737174  | 26.9  | 941907   | 0.70435 |
| HLCYLGDNRR                | ninaC Neither inactivation nor afterpotential protein C (EC 2.7.11.1) | 602.78  | 2 | 17.48 | 8493956  | 17.49 | 1859001  | 0.28431 |
| HSQFVK                    | ninaC Neither inactivation nor afterpotential protein C (EC 2.7.11.1) | 373.203 | 2 | 9.26  | 4129579  | 9.38  | 1484137  | 0.46686 |
| HTATEISVAHYTGR            | ninaC Neither inactivation nor afterpotential protein C (EC 2.7.11.1) | 771.887 | 2 | 18.64 | 1826203  | 18.65 | 976342   | 0.6945  |
| HTATEISVAHYTGR            | ninaC Neither inactivation nor afterpotential protein C (EC 2.7.11.1) | 514.927 | 3 | 18.67 | 34603876 | 18.61 | 24736648 | 0.92862 |
| INMNMSFPR                 | ninaC Neither inactivation nor afterpotential protein C (EC 2.7.11.1) | 555.265 | 2 | 33.61 | 1257006  | 33.45 | 473494   | 0.48933 |
| INMNMSFPR                 | ninaC Neither inactivation nor afterpotential protein C (EC 2.7.11.1) | 563.263 | 2 | 24.81 | 6223789  | 24.72 | 1413809  | 0.29509 |
| INMNMSFPR                 | ninaC Neither inactivation nor afterpotential protein C (EC 2.7.11.1) | 571.26  | 2 | 17.71 | 1092556  | 17.64 | 317990   | 0.37809 |
| IQHYDEEHQVSIEEYR          | ninaC Neither inactivation nor afterpotential protein C (EC 2.7.11.1) | 735.335 | 3 | 21.82 | 9144805  | 21.85 | 3841429  | 0.54568 |
| IQHYDEEHQVSIEEYR          | ninaC Neither inactivation nor afterpotential protein C (EC 2.7.11.1) | 551.753 | 4 | 21.82 | 11296823 | 21.81 | 5372007  | 0.61774 |
| LDQIPFYDTQYMVDPANSISR     | ninaC Neither inactivation nor afterpotential protein C (EC 2.7.11.1) | 825.062 | 3 | 47.1  | 965323   | 46.8  | 285191   | 0.38378 |
| LDQIPFYDTQYMVDPANSISR     | ninaC Neither inactivation nor afterpotential protein C (EC 2.7.11.1) | 1245.09 | 2 | 42.44 | 737594   | 42.18 | 108031   | 0.19026 |
| LDQIPFYDTQYMVDPANSISR     | ninaC Neither inactivation nor afterpotential protein C (EC 2.7.11.1) | 830.393 | 3 | 42.44 | 2133232  | 42.21 | 249429   | 0.51189 |
| LPFDEFRLR                 | ninaC Neither inactivation nor afterpotential protein C (EC 2.7.11.1) | 518.777 | 2 | 45.35 | 37304816 | 45.13 | 12833087 | 0.44688 |
| LYELQVK                   | ninaC Neither inactivation nor afterpotential protein C (EC 2.7.11.1) | 446.761 | 2 | 26.36 | 7134839  | 26.31 | 1279726  | 0.233   |
| MGESDNIYNQGYFR            | ninaC Neither inactivation nor afterpotential protein C (EC 2.7.11.1) | 855.365 | 2 | 29.06 | 790199   | 28.98 | 104614   | 0.17198 |
| MLSQANLGVHFVR             | ninaC Neither inactivation nor afterpotential protein C (EC 2.7.11.1) | 529.28  | 3 | 31.04 | 3025753  | 30.96 | 721657   | 0.30983 |
| MLSQANLGVHFVR             | ninaC Neither inactivation nor afterpotential protein C (EC 2.7.11.1) | 534.612 | 3 | 28.76 | 906685   | 28.64 | 111527   | 0.15979 |
| MYPEDLAALENPVDENIIESLR    | ninaC Neither inactivation nor afterpotential protein C (EC 2.7.11.1) | 1266.12 | 2 | 55.67 | 1021590  | 55.37 | 543268   | 0.69081 |
| MYPEDLAALENPVDENIIESLR    | ninaC Neither inactivation nor afterpotential protein C (EC 2.7.11.1) | 844.416 | 3 | 55.74 | 3400744  | 55.49 | 1974218  | 0.75413 |
| MYPEDLAALENPVDENIIESLR    | ninaC Neither inactivation nor afterpotential protein C (EC 2.7.11.1) | 1274.12 | 2 | 53.98 | 1115935  | 53.78 | 538899   | 0.62732 |
| MYPEDLAALENPVDENIIESLR    | ninaC Neither inactivation nor afterpotential protein C (EC 2.7.11.1) | 849.748 | 3 | 54.05 | 4350341  | 53.78 | 2829471  | 0.8449  |

|                            |         |                                                                     |                         |         |   |       |          |       |          |         |
|----------------------------|---------|---------------------------------------------------------------------|-------------------------|---------|---|-------|----------|-------|----------|---------|
| NEGDNSEDPFFNFK             | ninaC   | Neither inactivation nor afterpotential                             | protein C (EC 2.7.11.1) | 805.342 | 2 | 30.49 | 20135672 | 30.36 | 13465555 | 0.86872 |
| NHVLHR                     | ninaC   | Neither inactivation nor afterpotential                             | protein C (EC 2.7.11.1) | 388.22  | 2 | 7.47  | 3112849  | 7.55  | 783942   | 0.32715 |
| NPPPTLMRPTNWSQQINDFISESLE  | ninaC   | Neither inactivation nor afterpotential                             | protein C (EC 2.7.11.1) | 1014.84 | 3 | 55.94 | 2051910  | 55.85 | 1795906  | 1.13697 |
| NPPPTLMRPTNWSQQINDFISESLE  | ninaC   | Neither inactivation nor afterpotential                             | protein C (EC 2.7.11.1) | 1020.17 | 3 | 52.77 | 5616241  | 52.6  | 3954417  | 0.91466 |
| NPSMTSCALTYNAYK            | ninaC   | Neither inactivation nor afterpotential                             | protein C (EC 2.7.11.1) | 860.887 | 2 | 28.39 | 475234   | 28.22 | 100326   | 0.27424 |
| NPSMTSCALTYNAYK            | ninaC   | Neither inactivation nor afterpotential                             | protein C (EC 2.7.11.1) | 868.885 | 2 | 23.43 | 1293065  | 23.38 | 266318   | 0.26755 |
| QAFPNQLLTQHMEDDEPWDSPLQf   | ninaC   | Neither inactivation nor afterpotential                             | protein C (EC 2.7.11.1) | 965.784 | 3 | 44.28 | 1072287  | 44.02 | 620225   | 0.75138 |
| QAFPNQLLTQHMEDDEPWDSPLQf   | ninaC   | Neither inactivation nor afterpotential                             | protein C (EC 2.7.11.1) | 971.115 | 3 | 41.07 | 2202046  | 40.9  | 1292612  | 0.76254 |
| QYTTEEAR                   | ninaC   | Neither inactivation nor afterpotential                             | protein C (EC 2.7.11.1) | 499.233 | 2 | 9.23  | 582523   | 9.39  | 114303   | 0.2549  |
| SCQDQDLIMDR                | ninaC   | Neither inactivation nor afterpotential                             | protein C (EC 2.7.11.1) | 690.798 | 2 | 23.63 | 8294816  | 23.65 | 3307863  | 0.51804 |
| SCQDQDLIMDR                | ninaC   | Neither inactivation nor afterpotential                             | protein C (EC 2.7.11.1) | 698.795 | 2 | 18.85 | 5333858  | 18.8  | 2256882  | 0.54965 |
| SFEDSNAR                   | ninaC   | Neither inactivation nor afterpotential                             | protein C (EC 2.7.11.1) | 463.204 | 2 | 9.94  | 841733   | 10.06 | 841427   | 1.29857 |
| SFEEAGSYVEEIEAPGITLSGYAVDI | ninaC   | Neither inactivation nor afterpotential                             | protein C (EC 2.7.11.1) | 916.104 | 3 | 58.22 | 3614784  | 57.91 | 3303289  | 1.1871  |
| SFHSDVVQQQMK               | ninaC   | Neither inactivation nor afterpotential                             | protein C (EC 2.7.11.1) | 717.346 | 2 | 18.46 | 3748466  | 18.46 | 2122639  | 0.73561 |
| SFHSDVVQQQMK               | ninaC   | Neither inactivation nor afterpotential                             | protein C (EC 2.7.11.1) | 478.566 | 3 | 18.46 | 11674488 | 18.42 | 8562709  | 0.95279 |
| SFHSDVVQQQMK               | ninaC   | Neither inactivation nor afterpotential                             | protein C (EC 2.7.11.1) | 725.343 | 2 | 13.74 | 1001280  | 13.67 | 558782   | 0.72495 |
| SFHSDVVQQQMK               | ninaC   | Neither inactivation nor afterpotential                             | protein C (EC 2.7.11.1) | 483.898 | 3 | 13.74 | 2486371  | 13.7  | 1898734  | 0.99202 |
| SGQLNENTADFIRPFAK          | ninaC   | Neither inactivation nor afterpotential                             | protein C (EC 2.7.11.1) | 954.484 | 2 | 36.11 | 2672476  | 35.9  | 869006   | 0.42241 |
| SGQLNENTADFIRPFAK          | ninaC   | Neither inactivation nor afterpotential                             | protein C (EC 2.7.11.1) | 636.659 | 3 | 36.08 | 34215476 | 35.93 | 14653759 | 0.55635 |
| SIFQVLLHYR                 | ninaC   | Neither inactivation nor afterpotential                             | protein C (EC 2.7.11.1) | 638.364 | 2 | 47.38 | 14050704 | 47.32 | 3586610  | 0.3316  |
| SIFQVLLHYR                 | ninaC   | Neither inactivation nor afterpotential                             | protein C (EC 2.7.11.1) | 425.912 | 3 | 47.38 | 24262952 | 47.32 | 7253295  | 0.38834 |
| SSLDESIMLMFTNQLTK          | ninaC   | Neither inactivation nor afterpotential                             | protein C (EC 2.7.11.1) | 979.484 | 2 | 58.98 | 726179   | 58.79 | 934663   | 1.67199 |
| SSLDESIMLMFTNQLTK          | ninaC   | Neither inactivation nor afterpotential                             | protein C (EC 2.7.11.1) | 653.325 | 3 | 58.9  | 731597   | 58.75 | 1150737  | 2.04327 |
| SSLDESIMLMFTNQLTK          | ninaC   | Neither inactivation nor afterpotential                             | protein C (EC 2.7.11.1) | 987.482 | 2 | 52.23 | 1067574  | 51.98 | 1917715  | 2.3335  |
| SSLDESIMLMFTNQLTK          | ninaC   | Neither inactivation nor afterpotential                             | protein C (EC 2.7.11.1) | 658.657 | 3 | 52.23 | 889198   | 51.98 | 1157228  | 1.69061 |
| SSYPPSDPVR                 | ninaC   | Neither inactivation nor afterpotential                             | protein C (EC 2.7.11.1) | 552.77  | 2 | 16.78 | 6761750  | 16.82 | 306942   | 0.05897 |
| SYALNTLSAGCISQVNNLR        | ninaC   | Neither inactivation nor afterpotential                             | protein C (EC 2.7.11.1) | 1041.03 | 2 | 38.84 | 1038066  | 38.54 | 265120   | 0.33177 |
| SYALNTLSAGCISQVNNLR        | ninaC   | Neither inactivation nor afterpotential                             | protein C (EC 2.7.11.1) | 694.353 | 3 | 38.76 | 1954606  | 38.58 | 912018   | 0.60613 |
| TALDNLLTKPDGLFYIIDDASR     | ninaC   | Neither inactivation nor afterpotential                             | protein C (EC 2.7.11.1) | 1226.14 | 2 | 58.41 | 1814072  | 58.25 | 838256   | 0.60027 |
| TALDNLLTKPDGLFYIIDDASR     | ninaC   | Neither inactivation nor afterpotential                             | protein C (EC 2.7.11.1) | 817.764 | 3 | 58.41 | 21971862 | 58.25 | 11525014 | 0.68139 |
| TLAANFR                    | ninaC   | Neither inactivation nor afterpotential                             | protein C (EC 2.7.11.1) | 396.722 | 2 | 20.39 | 6184618  | 20.39 | 1161221  | 0.24391 |
| VATTDGTQHNHFIFYYFYDFINQQN  | ninaC   | Neither inactivation nor afterpotential                             | protein C (EC 2.7.11.1) | 863.914 | 4 | 56.09 | 1522872  | 55.61 | 34117    | 0.0291  |
| YQDDEGYNSSSGNYGVSR         | ninaC   | Neither inactivation nor afterpotential                             | protein C (EC 2.7.11.1) | 666.608 | 3 | 17.71 | 250320   | 17.76 | 340207   | 1.76551 |
| YYNDEFLLAR                 | ninaC   | Neither inactivation nor afterpotential                             | protein C (EC 2.7.11.1) | 595.777 | 2 | 28.3  | 10393152 | 28.23 | 1903322  | 0.2379  |
| AGFAGDDAPR                 | Act87E  | Actin-87E                                                           |                         | 488.728 | 2 | 15.06 | 5346544  | 15.03 | 6072874  | 1.47551 |
| AVFPSIVGRPR                | Act87E  | Actin-87E                                                           |                         | 599.856 | 2 | 30.18 | 3527039  | 29.97 | 6233553  | 2.29587 |
| DSYVGDEAQS                 | Act87E  | Actin-87E                                                           |                         | 599.765 | 2 | 11.94 | 533801   | 12.02 | 513658   | 1.25002 |
| IWHHTFYNELR                | Act87E  | Actin-87E                                                           |                         | 505.921 | 3 | 25.48 | 1669489  | 25.49 | 2792816  | 2.17311 |
| SYELPDGQVITIGNER           | Act87E  | Actin-87E                                                           |                         | 895.95  | 2 | 39.17 | 5791673  | 39    | 8517636  | 1.91046 |
| SYELPDGQVITIGNER           | Act87E  | Actin-87E                                                           |                         | 597.635 | 3 | 39.17 | 427938   | 38.97 | 800279   | 2.42931 |
| TTGIVLDSGDGVSHTVPIYEGYALPI | Act87E  | Actin-87E                                                           |                         | 1051.22 | 3 | 45.78 | 1749429  | 45.58 | 1016220  | 0.75459 |
| VAPEEHPVLLTEAPLNPK         | Act87E  | Actin-87E                                                           |                         | 977.536 | 2 | 34.25 | 620752   | 34.11 | 748708   | 1.56681 |
| VAPEEHPVLLTEAPLNPK         | Act87E  | Actin-87E                                                           |                         | 652.026 | 3 | 34.21 | 12031327 | 34.11 | 16999678 | 1.83548 |
| AGFAGDDAPR                 | Act5C   | Actin-5C                                                            |                         | 488.728 | 2 | 15.06 | 5346544  | 15.03 | 6072874  | 1.47551 |
| AVFPSIVGRPR                | Act5C   | Actin-5C                                                            |                         | 599.856 | 2 | 30.18 | 3527039  | 29.97 | 6233553  | 2.29587 |
| DSYVGDEAQS                 | Act5C   | Actin-5C                                                            |                         | 599.765 | 2 | 11.94 | 533801   | 12.02 | 513658   | 1.25002 |
| IWHHTFYNELR                | Act5C   | Actin-5C                                                            |                         | 505.921 | 3 | 25.48 | 1669489  | 25.49 | 2792816  | 2.17311 |
| SYELPDGQVITIGNER           | Act5C   | Actin-5C                                                            |                         | 895.95  | 2 | 39.17 | 5791673  | 39    | 8517636  | 1.91046 |
| SYELPDGQVITIGNER           | Act5C   | Actin-5C                                                            |                         | 597.635 | 3 | 39.17 | 427938   | 38.97 | 800279   | 2.42931 |
| TTGIVLDSGDGVSHTVPIYEGYALPI | Act5C   | Actin-5C                                                            |                         | 1051.22 | 3 | 45.78 | 1749429  | 45.58 | 1016220  | 0.75459 |
| VAPEEHPVLLTEAPLNPK         | Act5C   | Actin-5C                                                            |                         | 977.536 | 2 | 34.25 | 620752   | 34.11 | 748708   | 1.56681 |
| VAPEEHPVLLTEAPLNPK         | Act5C   | Actin-5C                                                            |                         | 652.026 | 3 | 34.21 | 12031327 | 34.11 | 16999678 | 1.83548 |
| FAPEIISMVLT                | Hsc70-2 | Heat shock 70 kDa protein cognate 2 (Heat shock 70 kDa protein 87D) |                         | 726.376 | 2 | 41.77 | 22231    | 41.79 | 11132469 | 650.511 |

|                             |         |                                                                            |         |   |       |          |       |          |         |
|-----------------------------|---------|----------------------------------------------------------------------------|---------|---|-------|----------|-------|----------|---------|
| FAPEEISSMVLTK               | Hsc70-2 | Heat shock 70 kDa protein cognate 2 (Heat shock 70 kDa protein 87D)        | 484.587 | 3 | 41.77 | 0        | 41.79 | 276280   | #DIV/0! |
| FAPEEISSMVLTK               | Hsc70-2 | Heat shock 70 kDa protein cognate 2 (Heat shock 70 kDa protein 87D)        | 734.374 | 2 | 35.12 | 297494   | 34.86 | 2047640  | 8.94124 |
| QQQIFTTYSNDQNAVTIQVYEGER    | Hsc70-2 | Heat shock 70 kDa protein cognate 2 (Heat shock 70 kDa protein 87D)        | 944.786 | 3 | 42.73 | 477571   | 42.56 | 627649   | 1.70727 |
| VEIIANDQGNR                 | Hsc70-2 | Heat shock 70 kDa protein cognate 2 (Heat shock 70 kDa protein 87D)        | 614.818 | 2 | 18.24 | 20421124 | 18.27 | 30231408 | 1.9231  |
| APAVGIDLGTTYSVGVFQHGK       | Hsc70-4 | Heat shock 70 kDa protein cognate 4 (Heat shock 70 kDa protein 88E)        | 759.716 | 3 | 40.45 | 5148820  | 40.23 | 3011430  | 0.75978 |
| ATLDEDNLK                   | Hsc70-4 | Heat shock 70 kDa protein cognate 4 (Heat shock 70 kDa protein 88E)        | 509.756 | 2 | 17.44 | 12568892 | 17.45 | 9571772  | 0.98928 |
| DAGTIAGLNLVR                | Hsc70-4 | Heat shock 70 kDa protein cognate 4 (Heat shock 70 kDa protein 88E)        | 600.341 | 2 | 38.18 | 41262500 | 38.03 | 54952584 | 1.73004 |
| ELEGVCNPIITK                | Hsc70-4 | Heat shock 70 kDa protein cognate 4 (Heat shock 70 kDa protein 88E)        | 686.861 | 2 | 30.64 | 3930112  | 30.51 | 6693284  | 2.21236 |
| ETAAYLGLK                   | Hsc70-4 | Heat shock 70 kDa protein cognate 4 (Heat shock 70 kDa protein 88E)        | 491.248 | 2 | 18.78 | 1276400  | 18.74 | 1203743  | 1.22509 |
| FEELNADLFR                  | Hsc70-4 | Heat shock 70 kDa protein cognate 4 (Heat shock 70 kDa protein 88E)        | 627.312 | 2 | 40.11 | 5534845  | 39.92 | 4957492  | 1.16353 |
| FELSGIPPAPR                 | Hsc70-4 | Heat shock 70 kDa protein cognate 4 (Heat shock 70 kDa protein 88E)        | 592.327 | 2 | 35.41 | 8081636  | 34.58 | 6361236  | 1.0225  |
| HWPFEVVSADGKPK              | Hsc70-4 | Heat shock 70 kDa protein cognate 4 (Heat shock 70 kDa protein 88E)        | 532.944 | 3 | 32.25 | 1810179  | 32.17 | 1759279  | 1.26251 |
| LLQDLFNGK                   | Hsc70-4 | Heat shock 70 kDa protein cognate 4 (Heat shock 70 kDa protein 88E)        | 524.295 | 2 | 37.39 | 815568   | 37.18 | 536116   | 0.85393 |
| LVTHFVQEFK                  | Hsc70-4 | Heat shock 70 kDa protein cognate 4 (Heat shock 70 kDa protein 88E)        | 416.564 | 3 | 29.17 | 6951855  | 29.06 | 4441078  | 0.82987 |
| NQVAMNPTQTIFDAK             | Hsc70-4 | Heat shock 70 kDa protein cognate 4 (Heat shock 70 kDa protein 88E)        | 839.417 | 2 | 35.8  | 3572564  | 35.58 | 4997890  | 1.81731 |
| NQVAMNPTQTIFDAK             | Hsc70-4 | Heat shock 70 kDa protein cognate 4 (Heat shock 70 kDa protein 88E)        | 847.414 | 2 | 30.99 | 17359498 | 30.83 | 24582760 | 1.83957 |
| NVLIFDLGGGTFDVSILSIDDGIFEV  | Hsc70-4 | Heat shock 70 kDa protein cognate 4 (Heat shock 70 kDa protein 88E)        | 961.839 | 3 | 65.61 | 296742   | 65.62 | 318618   | 1.39481 |
| QQTFTTYSNDQPGVLIQVYEGER     | Hsc70-4 | Heat shock 70 kDa protein cognate 4 (Heat shock 70 kDa protein 88E)        | 925.447 | 3 | 42.59 | 6743949  | 42.36 | 8544964  | 1.64596 |
| NTNSIAVAYGAAVQAAILHGDK      | Hsc70-4 | Heat shock 70 kDa protein cognate 4 (Heat shock 70 kDa protein 88E)        | 770.729 | 3 | 49.12 | 5844145  | 48.87 | 6076260  | 1.35063 |
| STAGDTHLGGEDFDNR            | Hsc70-4 | Heat shock 70 kDa protein cognate 4 (Heat shock 70 kDa protein 88E)        | 846.366 | 2 | 18.67 | 1657789  | 18.65 | 1831600  | 1.43524 |
| STAGDTHLGGEDFDNR            | Hsc70-4 | Heat shock 70 kDa protein cognate 4 (Heat shock 70 kDa protein 88E)        | 564.58  | 3 | 18.67 | 10781481 | 18.68 | 14815577 | 1.7851  |
| SVIHDIVLVGGSTR              | Hsc70-4 | Heat shock 70 kDa protein cognate 4 (Heat shock 70 kDa protein 88E)        | 726.912 | 2 | 33.42 | 16676664 | 33.29 | 17014050 | 1.32532 |
| SVIHDIVLVGGSTR              | Hsc70-4 | Heat shock 70 kDa protein cognate 4 (Heat shock 70 kDa protein 88E)        | 484.944 | 3 | 33.42 | 25909346 | 33.29 | 28104442 | 1.4091  |
| TFPPEEISSMVLTK              | Hsc70-4 | Heat shock 70 kDa protein cognate 4 (Heat shock 70 kDa protein 88E)        | 814.916 | 2 | 50.99 | 8350954  | 50.71 | 10307238 | 1.60335 |
| TFPPEEISSMVLTK              | Hsc70-4 | Heat shock 70 kDa protein cognate 4 (Heat shock 70 kDa protein 88E)        | 543.613 | 3 | 50.99 | 1053530  | 50.71 | 1236310  | 1.52441 |
| TFPPEEISSMVLTK              | Hsc70-4 | Heat shock 70 kDa protein cognate 4 (Heat shock 70 kDa protein 88E)        | 822.913 | 2 | 44.06 | 1805317  | 44.17 | 2932806  | 2.11034 |
| TFPPEEISSMVLTK              | Hsc70-4 | Heat shock 70 kDa protein cognate 4 (Heat shock 70 kDa protein 88E)        | 548.944 | 3 | 43.99 | 365196   | 44.13 | 736202   | 2.61875 |
| TLSSSTQASIEIDSLFEGTDFYTSITF | Hsc70-4 | Heat shock 70 kDa protein cognate 4 (Heat shock 70 kDa protein 88E)        | 990.48  | 3 | 57.43 | 13069925 | 57.18 | 15772457 | 1.56765 |
| TTPSYVAFTDTER               | Hsc70-4 | Heat shock 70 kDa protein cognate 4 (Heat shock 70 kDa protein 88E)        | 744.354 | 2 | 29.29 | 49722228 | 29.17 | 61082460 | 1.59584 |
| TVTNAVITVPAYFNDSQR          | Hsc70-4 | Heat shock 70 kDa protein cognate 4 (Heat shock 70 kDa protein 88E)        | 998.51  | 2 | 40.66 | 11484469 | 40.5  | 14976923 | 1.69408 |
| TVTNAVITVPAYFNDSQR          | Hsc70-4 | Heat shock 70 kDa protein cognate 4 (Heat shock 70 kDa protein 88E)        | 666.009 | 3 | 40.66 | 13980052 | 40.46 | 17266742 | 1.60444 |
| VEIIANDQGNR                 | Hsc70-4 | Heat shock 70 kDa protein cognate 4 (Heat shock 70 kDa protein 88E)        | 614.818 | 2 | 18.24 | 20421124 | 18.27 | 30231408 | 1.9231  |
| ISGNHLTEIPDDAFTGLER         | chp     | Chaoptin (Photoreceptor cell-specific membrane protein)                    | 695.68  | 3 | 38.69 | 287292   | 38.5  | 281624   | 1.27341 |
| LLLTDNILSEIPYDALGPLK        | chp     | Chaoptin (Photoreceptor cell-specific membrane protein)                    | 1099.62 | 2 | 62.1  | 575340   | 61.86 | 486645   | 1.09878 |
| LLLTDNILSEIPYDALGPLK        | chp     | Chaoptin (Photoreceptor cell-specific membrane protein)                    | 733.415 | 3 | 62.05 | 449702   | 61.83 | 498658   | 1.44046 |
| AAASIILR                    | CCT1    | T-complex protein 1 subunit alpha (TCP-1-alpha) (CCT-alpha) (Chaperonin cc | 407.761 | 2 | 25.72 | 2915044  | 25.64 | 1149857  | 0.51241 |
| EQLAIAEFAK                  | CCT1    | T-complex protein 1 subunit alpha (TCP-1-alpha) (CCT-alpha) (Chaperonin cc | 560.306 | 2 | 35.24 | 3285457  | 35.02 | 1749112  | 0.69158 |
| FATEAAITILR                 | CCT1    | T-complex protein 1 subunit alpha (TCP-1-alpha) (CCT-alpha) (Chaperonin cc | 603.348 | 2 | 39.36 | 10718412 | 39.2  | 13176747 | 1.59698 |
| ICDDELILIK                  | CCT1    | T-complex protein 1 subunit alpha (TCP-1-alpha) (CCT-alpha) (Chaperonin cc | 616.334 | 2 | 39.17 | 3199977  | 38.93 | 2711421  | 1.10071 |
| IHPTSIISGYR                 | CCT1    | T-complex protein 1 subunit alpha (TCP-1-alpha) (CCT-alpha) (Chaperonin cc | 622.343 | 2 | 25.75 | 1934865  | 25.67 | 1766943  | 1.1863  |
| IIGADAEFFSAMVVDAQAQSVK      | CCT1    | T-complex protein 1 subunit alpha (TCP-1-alpha) (CCT-alpha) (Chaperonin cc | 723.701 | 3 | 60.05 | 1786490  | 59.91 | 2285436  | 1.66185 |
| IIGADAEFFSAMVVDAQAQSVK      | CCT1    | T-complex protein 1 subunit alpha (TCP-1-alpha) (CCT-alpha) (Chaperonin cc | 729.033 | 3 | 49.26 | 1206828  | 48.93 | 1391766  | 1.49811 |
| LLEVEHPAAK                  | CCT1    | T-complex protein 1 subunit alpha (TCP-1-alpha) (CCT-alpha) (Chaperonin cc | 553.814 | 2 | 17.76 | 1488962  | 17.76 | 1720402  | 1.50096 |
| LLEVEHPAAK                  | CCT1    | T-complex protein 1 subunit alpha (TCP-1-alpha) (CCT-alpha) (Chaperonin cc | 369.545 | 3 | 17.76 | 5109354  | 17.76 | 6443911  | 1.63835 |
| MLVDDIGDVTVTNDGATILR        | CCT1    | T-complex protein 1 subunit alpha (TCP-1-alpha) (CCT-alpha) (Chaperonin cc | 1059.54 | 2 | 45.59 | 805671   | 45.35 | 784141   | 1.26433 |
| MLVDDIGDVTVTNDGATILR        | CCT1    | T-complex protein 1 subunit alpha (TCP-1-alpha) (CCT-alpha) (Chaperonin cc | 1067.54 | 2 | 42.51 | 681498   | 42.29 | 684194   | 1.30418 |
| MLVDDIGDVTVTNDGATILR        | CCT1    | T-complex protein 1 subunit alpha (TCP-1-alpha) (CCT-alpha) (Chaperonin cc | 712.028 | 3 | 42.51 | 590691   | 42.33 | 540350   | 1.18833 |
| SLLVIPK                     | CCT1    | T-complex protein 1 subunit alpha (TCP-1-alpha) (CCT-alpha) (Chaperonin cc | 385.263 | 2 | 33.27 | 2316109  | 33.09 | 1393818  | 0.78175 |
| SSLGPVGLDK                  | CCT1    | T-complex protein 1 subunit alpha (TCP-1-alpha) (CCT-alpha) (Chaperonin cc | 486.772 | 2 | 24.74 | 2956948  | 24.72 | 3410829  | 1.49844 |
| SYHNSSQTKPER                | CCT1    | T-complex protein 1 subunit alpha (TCP-1-alpha) (CCT-alpha) (Chaperonin cc | 717.342 | 2 | 6.8   | 51478    | 6.73  | 17702    | 0.44671 |
| SYHNSSQTKPER                | CCT1    | T-complex protein 1 subunit alpha (TCP-1-alpha) (CCT-alpha) (Chaperonin cc | 478.564 | 3 | 6.8   | 142153   | 6.73  | 56320    | 0.51467 |
| TQNVMMAALSISNIVK            | CCT1    | T-complex protein 1 subunit alpha (TCP-1-alpha) (CCT-alpha) (Chaperonin cc | 794.94  | 2 | 46.95 | 1284833  | 46.68 | 1508805  | 1.52549 |
| TQNVMMAALSISNIVK            | CCT1    | T-complex protein 1 subunit alpha (TCP-1-alpha) (CCT-alpha) (Chaperonin cc | 802.937 | 2 | 39.73 | 2202017  | 39.48 | 2641875  | 1.55853 |

|                            |          |                                                                                                |         |   |       |          |       |          |         |
|----------------------------|----------|------------------------------------------------------------------------------------------------|---------|---|-------|----------|-------|----------|---------|
| VLVELAQLQDEEVDGTTSSVILAA   | CCT1     | T-complex protein 1 subunit alpha (TCP-1-alpha) (CCT-alpha) (Chaperonin cc                     | 1018.23 | 3 | 65.61 | 1972773  | 65.17 | 0        | 0       |
| WTGLDLIEGVVR               | CCT1     | T-complex protein 1 subunit alpha (TCP-1-alpha) (CCT-alpha) (Chaperonin cc                     | 679.377 | 2 | 53.01 | 1351754  | 52.71 | 645340   | 0.62017 |
| YFVEAGAMAVR                | CCT1     | T-complex protein 1 subunit alpha (TCP-1-alpha) (CCT-alpha) (Chaperonin cc                     | 615.303 | 2 | 24.89 | 676486   | 24.87 | 566812   | 1.08844 |
| DITEASIWDSYVLPK            | RpS26    | 40S ribosomal protein S26 (DS31)                                                               | 868.941 | 2 | 48.98 | 315622   | 48.7  | 205408   | 0.84542 |
| ALLELQLDAEELYQTFQR         | EF2      | Elongation factor 2 (EF-2)                                                                     | 727.379 | 3 | 59.67 | 211967   | 59.47 | 377847   | 2.31563 |
| AYLPVNESFGFTADLR           | EF2      | Elongation factor 2 (EF-2)                                                                     | 900.452 | 2 | 46.72 | 334189   | 46.49 | 1152789  | 4.48105 |
| AYLPVNESFGFTADLR           | EF2      | Elongation factor 2 (EF-2)                                                                     | 600.637 | 3 | 46.72 | 103190   | 46.53 | 217303   | 2.73559 |
| EGILADENLR                 | EF2      | Elongation factor 2 (EF-2)                                                                     | 565.296 | 2 | 27.58 | 191418   | 27.42 | 395454   | 2.68371 |
| GFLINLIDSPGHVDFSSVEAALR    | EF2      | Elongation factor 2 (EF-2)                                                                     | 853.446 | 3 | 57.19 | 25314    | 56.52 | 168687   | 8.65652 |
| GGGQIIPTR                  | EF2      | Elongation factor 2 (EF-2)                                                                     | 500.283 | 2 | 19.8  | 516572   | 19.79 | 630853   | 1.58643 |
| LMEPVYLCEIQCEVAVGGIYGVLN   | EF2      | Elongation factor 2 (EF-2)                                                                     | 993.831 | 3 | 57.43 | 170257   | 57    | 114365   | 0.87259 |
| LMEPVYLCEIQCEVAVGGIYGVLN   | EF2      | Elongation factor 2 (EF-2)                                                                     | 999.162 | 3 | 55.33 | 485439   | 54.81 | 219284   | 0.58681 |
| NPADLPK                    | EF2      | Elongation factor 2 (EF-2)                                                                     | 377.708 | 2 | 13.89 | 33881    | 13.79 | 44731    | 1.71504 |
| STLTDSLVS                  | EF2      | Elongation factor 2 (EF-2)                                                                     | 525.788 | 2 | 24.62 | 115364   | 24.6  | 560125   | 6.30721 |
| TGTITTFK                   | EF2      | Elongation factor 2 (EF-2)                                                                     | 434.742 | 2 | 19.37 | 42040    | 19.33 | 38671    | 1.19494 |
| VTDGALVVVDCVSGVCVQTETVLR   | EF2      | Elongation factor 2 (EF-2)                                                                     | 859.44  | 3 | 48.52 | 244266   | 48.19 | 220870   | 1.17462 |
| YVEAIEDVPSGNICGLVGVQDQFLVK | EF2      | Elongation factor 2 (EF-2)                                                                     | 907.798 | 3 | 53.98 | 113966   | 53.65 | 365856   | 4.1702  |
| ILPLDGLQAGYR               | norpA    | 1-phosphatidylinositol 4,5-bisphosphate phosphodiesterase (EC 3.1.4.11) (1-φ                   | 658.372 | 2 | 39.05 | 1848340  | 38.89 | 1619786  | 1.13841 |
| NDIEELFTSITK               | norpA    | 1-phosphatidylinositol 4,5-bisphosphate phosphodiesterase (EC 3.1.4.11) (1-φ                   | 705.362 | 2 | 50.41 | 647218   | 50.1  | 519426   | 1.04255 |
| VVLPDLAVLR                 | norpA    | 1-phosphatidylinositol 4,5-bisphosphate phosphodiesterase (EC 3.1.4.11) (1-φ                   | 547.85  | 2 | 45.88 | 627980   | 45.7  | 724721   | 1.49916 |
| VAPVEAVTISNR               | mod      | DNA-binding protein modulo                                                                     | 671.87  | 2 | 25.93 | 637081   | 25.91 | 601323   | 1.22613 |
| EVSGDASEAALLK              | Atpalpha | Sodium/potassium-transporting ATPase subunit alpha (Na <sup>+</sup> )/K <sup>+</sup> ATPase al | 645.333 | 2 | 25.45 | 660865   | 25.35 | 279051   | 0.54852 |
| IATLCNR                    | Atpalpha | Sodium/potassium-transporting ATPase subunit alpha (Na <sup>+</sup> )/K <sup>+</sup> ATPase al | 424.226 | 2 | 14.34 | 183981   | 14.32 | 209877   | 1.48188 |
| LIIVEGCQR                  | Atpalpha | Sodium/potassium-transporting ATPase subunit alpha (Na <sup>+</sup> )/K <sup>+</sup> ATPase al | 544.3   | 2 | 24.31 | 677846   | 24.36 | 746923   | 1.43142 |
| LNIPVSEVNPR                | Atpalpha | Sodium/potassium-transporting ATPase subunit alpha (Na <sup>+</sup> )/K <sup>+</sup> ATPase al | 619.349 | 2 | 30.64 | 1527141  | 30.51 | 1174989  | 0.99949 |
| NLAFFSTNAVEGTAK            | Atpalpha | Sodium/potassium-transporting ATPase subunit alpha (Na <sup>+</sup> )/K <sup>+</sup> ATPase al | 785.399 | 2 | 38.55 | 1771624  | 38.01 | 15711079 | 11.5201 |
| YHTEIVFAR                  | Atpalpha | Sodium/potassium-transporting ATPase subunit alpha (Na <sup>+</sup> )/K <sup>+</sup> ATPase al | 568.298 | 2 | 25.19 | 792742   | 25.03 | 558537   | 0.91526 |
| YHTEIVFAR                  | Atpalpha | Sodium/potassium-transporting ATPase subunit alpha (Na <sup>+</sup> )/K <sup>+</sup> ATPase al | 379.201 | 3 | 25.23 | 368207   | 25.07 | 375193   | 1.32369 |
| EIELYLFQER                 | ref(2)P  | Protein ref(2)P (Refractory to sigma P)                                                        | 670.348 | 2 | 45.17 | 146813   | 44.97 | 693000   | 6.13184 |
| CNLTFVFSKPEEK              | RpS27A   | Ubiquitin-40S ribosomal protein S27a [Cleaved into: Ubiquitin; 40S ribosomal                   | 533.601 | 3 | 33.88 | 499625   | 33.75 | 877919   | 2.28261 |
| ESTLHLVLR                  | RpS27A   | Ubiquitin-40S ribosomal protein S27a [Cleaved into: Ubiquitin; 40S ribosomal                   | 534.314 | 2 | 29.06 | 19834334 | 28.96 | 12823394 | 0.83986 |
| ESTLHLVLR                  | RpS27A   | Ubiquitin-40S ribosomal protein S27a [Cleaved into: Ubiquitin; 40S ribosomal                   | 356.545 | 3 | 29.02 | 13873703 | 28.96 | 8349692  | 0.78181 |
| MQIFVK                     | RpS27A   | Ubiquitin-40S ribosomal protein S27a [Cleaved into: Ubiquitin; 40S ribosomal                   | 383.22  | 2 | 27.43 | 8697430  | 27.39 | 10348569 | 1.54565 |
| TITLEVEPSDTIENVK           | RpS27A   | Ubiquitin-40S ribosomal protein S27a [Cleaved into: Ubiquitin; 40S ribosomal                   | 894.467 | 2 | 36.85 | 41743372 | 36.64 | 47966256 | 1.49269 |
| TITLEVEPSDTIENVK           | RpS27A   | Ubiquitin-40S ribosomal protein S27a [Cleaved into: Ubiquitin; 40S ribosomal                   | 596.647 | 3 | 36.85 | 1563861  | 36.68 | 1963090  | 1.63066 |
| TLSDYNIQK                  | RpS27A   | Ubiquitin-40S ribosomal protein S27a [Cleaved into: Ubiquitin; 40S ribosomal                   | 541.28  | 2 | 19.53 | 19914654 | 19.52 | 7860957  | 0.51277 |
| AGIAVEGDIK                 | Arr1     | Phosrestin-2 (Arrestin-1) (Arrestin-A) (Phosrestin II)                                         | 486.772 | 2 | 22.98 | 2931108  | 22.98 | 1880959  | 0.83362 |
| ASDESQPCGVQYFVK            | Arr1     | Phosrestin-2 (Arrestin-1) (Arrestin-A) (Phosrestin II)                                         | 857.891 | 2 | 30.22 | 589087   | 30.08 | 894673   | 1.97291 |
| DFLLSPGELLEVTLDK           | Arr1     | Phosrestin-2 (Arrestin-1) (Arrestin-A) (Phosrestin II)                                         | 959.506 | 2 | 56.3  | 265898   | 55.99 | 462292   | 2.25852 |
| DFVDSVTQVEPIDGIIVLDDEYVR   | Arr1     | Phosrestin-2 (Arrestin-1) (Arrestin-A) (Phosrestin II)                                         | 1368.68 | 2 | 59.17 | 646283   | 58.87 | 419252   | 0.8427  |
| DFVDSVTQVEPIDGIIVLDDEYVR   | Arr1     | Phosrestin-2 (Arrestin-1) (Arrestin-A) (Phosrestin II)                                         | 912.792 | 3 | 59.17 | 2018632  | 58.83 | 1330820  | 0.85642 |
| IFTGSDDCDR                 | Arr1     | Phosrestin-2 (Arrestin-1) (Arrestin-A) (Phosrestin II)                                         | 593.246 | 2 | 14.94 | 1443871  | 14.91 | 748462   | 0.67339 |
| IFVQLVCNFR                 | Arr1     | Phosrestin-2 (Arrestin-1) (Arrestin-A) (Phosrestin II)                                         | 648.35  | 2 | 42.99 | 1459871  | 42.8  | 1343715  | 1.19568 |
| ISVNICVR                   | Arr1     | Phosrestin-2 (Arrestin-1) (Arrestin-A) (Phosrestin II)                                         | 480.768 | 2 | 29.06 | 677107   | 28.92 | 402608   | 0.77241 |
| QGIQPCVTVR                 | Arr1     | Phosrestin-2 (Arrestin-1) (Arrestin-A) (Phosrestin II)                                         | 579.308 | 2 | 21.75 | 818570   | 21.73 | 482335   | 0.76545 |
| STINLGR                    | Arr1     | Phosrestin-2 (Arrestin-1) (Arrestin-A) (Phosrestin II)                                         | 437.261 | 2 | 27.76 | 3970398  | 27.69 | 3553533  | 1.16265 |
| VMYLVPTLVANCDR             | Arr1     | Phosrestin-2 (Arrestin-1) (Arrestin-A) (Phosrestin II)                                         | 825.921 | 2 | 44.34 | 873153   | 44.19 | 632809   | 0.94147 |
| DSSLSSGALANILAIFK          | Hn       | Protein henna (EC 1.14.16.1) (EC 1.14.16.4) (Phe-4-monooxygenase) (Phen)                       | 853.97  | 2 | 65.24 | 302707   | 65.18 | 21367    | 0.09169 |
| FANSIPRPFVGR               | Hn       | Protein henna (EC 1.14.16.1) (EC 1.14.16.4) (Phe-4-monooxygenase) (Phen)                       | 454.254 | 3 | 31.64 | 779696   | 31.6  | 818437   | 1.36359 |
| DNYVPAVSALEQDIIEVDADTK     | RpS17    | 40S ribosomal protein S17                                                                      | 1203.09 | 2 | 56.74 | 463234   | 56.49 | 231517   | 0.64924 |
| GLQLTQPNNTNFFGR            | RpS17    | 40S ribosomal protein S17                                                                      | 780.4   | 2 | 29.1  | 12767330 | 29    | 13990296 | 1.42347 |
| IAGYVTHLMGR                | RpS17    | 40S ribosomal protein S17                                                                      | 609.327 | 2 | 29.32 | 3132626  | 29.21 | 1918585  | 0.7956  |
| IAGYVTHLMGR                | RpS17    | 40S ribosomal protein S17                                                                      | 406.553 | 3 | 29.32 | 3913691  | 29.24 | 2429526  | 0.80641 |

|                           |          |                                                                                   |         |   |       |          |       |          |         |
|---------------------------|----------|-----------------------------------------------------------------------------------|---------|---|-------|----------|-------|----------|---------|
| ICEEVAIPTKPLR             | RpS17    | 40S ribosomal protein S17                                                         | 819.966 | 2 | 33.87 | 1546348  | 33.76 | 658387   | 0.55309 |
| ICEEVAIPTKPLR             | RpS17    | 40S ribosomal protein S17                                                         | 546.98  | 3 | 33.87 | 10439692 | 33.72 | 5906749  | 0.73499 |
| LLDFHNIR                  | RpS17    | 40S ribosomal protein S17                                                         | 514.288 | 2 | 30.03 | 8251491  | 29.93 | 7739377  | 1.21842 |
| LTLDFHTNK                 | RpS17    | 40S ribosomal protein S17                                                         | 363.529 | 3 | 26.47 | 1458287  | 26.42 | 1674230  | 1.4914  |
| ESTLHLVLR                 | RpL40    | Ubiquitin-60S ribosomal protein L40 (CEP52) [Cleaved into: Ubiquitin; 60S rib     | 534.314 | 2 | 29.06 | 19834334 | 28.96 | 12823394 | 0.83986 |
| ESTLHLVLR                 | RpL40    | Ubiquitin-60S ribosomal protein L40 (CEP52) [Cleaved into: Ubiquitin; 60S rib     | 356.545 | 3 | 29.02 | 13873703 | 28.96 | 8349692  | 0.78181 |
| MQIFVK                    | RpL40    | Ubiquitin-60S ribosomal protein L40 (CEP52) [Cleaved into: Ubiquitin; 60S rib     | 383.22  | 2 | 27.43 | 8697430  | 27.39 | 10348569 | 1.54565 |
| TITLEVEPSDTIENVK          | RpL40    | Ubiquitin-60S ribosomal protein L40 (CEP52) [Cleaved into: Ubiquitin; 60S rib     | 894.467 | 2 | 36.85 | 41743372 | 36.64 | 47966256 | 1.49269 |
| TITLEVEPSDTIENVK          | RpL40    | Ubiquitin-60S ribosomal protein L40 (CEP52) [Cleaved into: Ubiquitin; 60S rib     | 596.647 | 3 | 36.85 | 1563861  | 36.68 | 1963090  | 1.63066 |
| TLSDYNIQK                 | RpL40    | Ubiquitin-60S ribosomal protein L40 (CEP52) [Cleaved into: Ubiquitin; 60S rib     | 541.28  | 2 | 19.53 | 19914654 | 19.52 | 7860957  | 0.51277 |
| AIETFHGTQVHVESR           | ple      | Tyrosine 3-monooxygenase (EC 1.14.16.2) (Protein Pale) (Tyrosine 3-hydrox)        | 570.957 | 3 | 18.83 | 39913    | 18.92 | 134503   | 4.37764 |
| GNLLQLIR                  | ple      | Tyrosine 3-monooxygenase (EC 1.14.16.2) (Protein Pale) (Tyrosine 3-hydrox)        | 463.793 | 2 | 37.15 | 0        | 41.79 | 173479   | #DIV/0! |
| YGDPIPFIDYSDEVK           | ple      | Tyrosine 3-monooxygenase (EC 1.14.16.2) (Protein Pale) (Tyrosine 3-hydrox)        | 928.951 | 2 | 47.5  | 0        | 47.3  | 113828   | #DIV/0! |
| DFIDHIDYCDPVDGVIVVEPDYK   | Arr2     | Phosrestin-1 (49 kDa arrestin-like protein) (Arrestin-2) (Arrestin-B) (Phosrestir | 946.118 | 3 | 51.5  | 344194   | 51.28 | 451785   | 1.7051  |
| GYYQDDDDNIVFEDFAK         | Arr2     | Phosrestin-1 (49 kDa arrestin-like protein) (Arrestin-2) (Arrestin-B) (Phosrestir | 1027.44 | 2 | 42.84 | 1017665  | 42.59 | 957088   | 1.22171 |
| HVAQLETK                  | Arr2     | Phosrestin-1 (49 kDa arrestin-like protein) (Arrestin-2) (Arrestin-B) (Phosrestir | 463.259 | 2 | 9.93  | 668361   | 10.05 | 276006   | 0.53645 |
| LLQPAPGTIEK               | Arr2     | Phosrestin-1 (49 kDa arrestin-like protein) (Arrestin-2) (Arrestin-B) (Phosrestir | 583.843 | 2 | 23.7  | 3216444  | 23.69 | 3105287  | 1.25415 |
| STGDACGIVISVSR            | Arr2     | Phosrestin-1 (49 kDa arrestin-like protein) (Arrestin-2) (Arrestin-B) (Phosrestir | 792.888 | 2 | 33.08 | 1311769  | 32.98 | 1197629  | 1.18601 |
| TFYLIPLAANNK              | Arr2     | Phosrestin-1 (49 kDa arrestin-like protein) (Arrestin-2) (Arrestin-B) (Phosrestir | 682.882 | 2 | 45.25 | 741418   | 45.13 | 706529   | 1.23791 |
| VFGQLATTYR                | Arr2     | Phosrestin-1 (49 kDa arrestin-like protein) (Arrestin-2) (Arrestin-B) (Phosrestir | 578.311 | 2 | 28.69 | 3204435  | 28.59 | 3234217  | 1.31111 |
| ALVDVLR                   | Rm62     | ATP-dependent RNA helicase p62 (EC 3.6.4.13)                                      | 393.248 | 2 | 32.4  | 917820   | 32.25 | 781548   | 1.10617 |
| EANQEINPALENLAR           | Rm62     | ATP-dependent RNA helicase p62 (EC 3.6.4.13)                                      | 841.429 | 2 | 32.48 | 1286441  | 32.37 | 785963   | 0.79366 |
| ELAQIQQVATEFGSSSYVR       | Rm62     | ATP-dependent RNA helicase p62 (EC 3.6.4.13)                                      | 747.71  | 3 | 48.34 | 417102   | 48.12 | 508191   | 1.58273 |
| FGGGGGFGDR                | Rm62     | ATP-dependent RNA helicase p62 (EC 3.6.4.13)                                      | 463.709 | 2 | 17.67 | 571805   | 17.72 | 448173   | 1.01817 |
| NTCVFGGAPK                | Rm62     | ATP-dependent RNA helicase p62 (EC 3.6.4.13)                                      | 525.755 | 2 | 19.91 | 235668   | 19.91 | 262752   | 1.44833 |
| SNILVATDVAAR              | Rm62     | ATP-dependent RNA helicase p62 (EC 3.6.4.13)                                      | 615.346 | 2 | 29.95 | 1490640  | 29.85 | 1916326  | 1.67001 |
| YVINFDYPQNSEDIHR          | Rm62     | ATP-dependent RNA helicase p62 (EC 3.6.4.13)                                      | 725.004 | 3 | 37.84 | 686584   | 37.79 | 447734   | 0.84713 |
| STFTVDITPLILAAHR          | trp      | Transient receptor potential protein                                              | 585.665 | 3 | 49.88 | 352438   | 49.67 | 830498   | 3.0611  |
| AQELWELIVK                | up       | Troponin T, skeletal muscle (Protein intended thorax) (Protein upheld)            | 614.85  | 2 | 48.34 | 857786   | 48.15 | 594529   | 0.90036 |
| DAGVLGLSSAAMER            | up       | Troponin T, skeletal muscle (Protein intended thorax) (Protein upheld)            | 696.843 | 2 | 30.26 | 1579477  | 30.2  | 1875543  | 1.54254 |
| IKPLAIEGFGEAK             | up       | Troponin T, skeletal muscle (Protein intended thorax) (Protein upheld)            | 458.266 | 3 | 33.5  | 4523125  | 33.37 | 3961091  | 1.13762 |
| ISLSFR                    | up       | Troponin T, skeletal muscle (Protein intended thorax) (Protein upheld)            | 361.713 | 2 | 30.22 | 1860854  | 30.16 | 1791066  | 1.25032 |
| ILEDSPNAR                 | Gs2      | Glutamine synthetase 2 cytoplasmic (EC 6.3.1.2) (Glutamate--ammonia ligase        | 507.764 | 2 | 13.95 | 1451117  | 13.97 | 865640   | 0.77492 |
| TLDFIPQSPK                | Gs2      | Glutamine synthetase 2 cytoplasmic (EC 6.3.1.2) (Glutamate--ammonia ligase        | 573.314 | 2 | 33.87 | 1671981  | 33.68 | 1493163  | 1.16011 |
| YLSLPLQENIVQATYVWIDGTGEDL | Gs2      | Glutamine synthetase 2 cytoplasmic (EC 6.3.1.2) (Glutamate--ammonia ligase        | 998.513 | 3 | 65.64 | 539196   | 65.12 | 224891   | 0.54181 |
| IAFSPYGNITSAK             | pAbp     | Polyadenylate-binding protein (PABP) (Poly(A)-binding protein)                    | 684.862 | 2 | 33.2  | 475743   | 33.09 | 1061132  | 2.89747 |
| SLGYAYVNFQQPADAER         | pAbp     | Polyadenylate-binding protein (PABP) (Poly(A)-binding protein)                    | 964.96  | 2 | 35.22 | 2374556  | 35.06 | 1626827  | 0.88998 |
| IGTSEPIGR                 | Syt1     | Synaptotagmin 1 (p65)                                                             | 465.256 | 2 | 15.84 | 896749   | 15.87 | 539143   | 0.78101 |
| TLSPVFNETFTFK             | Syt1     | Synaptotagmin 1 (p65)                                                             | 765.896 | 2 | 45.21 | 1109199  | 44.93 | 1551467  | 1.817   |
| AQYLQSVEDR                | SdhB     | Succinate dehydrogenase [ubiquinone] iron-sulfur subunit, mitochondrial (EC       | 604.799 | 2 | 21.3  | 641212   | 21.34 | 272433   | 0.55193 |
| SGSGGSTGYVPTGRPR          | D1       | Chromosomal protein D1                                                            | 512.59  | 3 | 14.38 | 493054   | 14.31 | 732667   | 1.93034 |
| EFTLEFSR                  | SERCA    | Calcium-transporting ATPase sarcoplasmic/endoplasmic reticulum type (EC 7         | 514.756 | 2 | 35.79 | 511756   | 35.66 | 541898   | 1.37555 |
| GVVIGTGLSTAIGK            | SERCA    | Calcium-transporting ATPase sarcoplasmic/endoplasmic reticulum type (EC 7         | 636.88  | 2 | 34.79 | 1157677  | 34.58 | 1583799  | 1.77719 |
| IDQSILTGESVSVIK           | SERCA    | Calcium-transporting ATPase sarcoplasmic/endoplasmic reticulum type (EC 7         | 794.943 | 2 | 37.8  | 1179386  | 37.6  | 1456916  | 1.60473 |
| IGVFAEDEDTTGK             | SERCA    | Calcium-transporting ATPase sarcoplasmic/endoplasmic reticulum type (EC 7         | 691.328 | 2 | 25.89 | 1569911  | 25.87 | 1880132  | 1.55574 |
| ITHIYSTTLR                | SERCA    | Calcium-transporting ATPase sarcoplasmic/endoplasmic reticulum type (EC 7         | 602.838 | 2 | 20.66 | 336218   | 20.64 | 473921   | 1.83108 |
| ITHIYSTTLR                | SERCA    | Calcium-transporting ATPase sarcoplasmic/endoplasmic reticulum type (EC 7         | 402.228 | 3 | 20.66 | 1041150  | 20.64 | 1511216  | 1.88554 |
| LNSFSVNK                  | SERCA    | Calcium-transporting ATPase sarcoplasmic/endoplasmic reticulum type (EC 7         | 454.745 | 2 | 18.74 | 212026   | 18.69 | 338612   | 2.07461 |
| NILFSGTNVAAGK             | SERCA    | Calcium-transporting ATPase sarcoplasmic/endoplasmic reticulum type (EC 7         | 646.354 | 2 | 32.18 | 877088   | 32.05 | 1429695  | 2.1175  |
| TVEQSLNFFGTDPER           | SERCA    | Calcium-transporting ATPase sarcoplasmic/endoplasmic reticulum type (EC 7         | 870.415 | 2 | 39.92 | 733529   | 39.73 | 1152158  | 2.04041 |
| AVTIFSPDGHLLQVEYAQEA VR   | Prosalph | Proteasome subunit alpha type-7-1 (EC 3.4.25.1) (PROS-Dm28.1) (Proteasor          | 815.092 | 3 | 44.54 | 28780    | 44.39 | 426811   | 19.2649 |
| EAGPAASASEPEAK            | Hsp67Bc  | Heat shock protein 67B3 (Heat shock 18 kDa protein)                               | 657.812 | 2 | 11.43 | 0        | 11.55 | 137626   | #DIV/0! |
| NGELAALS R                | Hsp67Bc  | Heat shock protein 67B3 (Heat shock 18 kDa protein)                               | 465.754 | 2 | 21.98 | 6343     | 21.77 | 75473    | 15.4568 |

|                         |           |                                                                                 |         |   |       |          |       |          |         |
|-------------------------|-----------|---------------------------------------------------------------------------------|---------|---|-------|----------|-------|----------|---------|
| RPATSGTGSVASSTAR        | Map205    | 205 kDa microtubule-associated protein                                          | 753.387 | 2 | 9.41  | 74073    | 9.52  | 32583    | 0.57142 |
| VFFDMTADNEPLGR          | Cyp1      | Peptidyl-prolyl cis-trans isomerase (PPIase) (EC 5.2.1.8) (Cyclophilin) (Cyclos | 806.377 | 2 | 40.79 | 146730   | 40.66 | 612781   | 5.42511 |
| VFFDMTADNEPLGR          | Cyp1      | Peptidyl-prolyl cis-trans isomerase (PPIase) (EC 5.2.1.8) (Cyclophilin) (Cyclos | 814.375 | 2 | 34.05 | 24529    | 34.41 | 273040   | 14.46   |
| VYSPHVLNLTLDLPLGLTK     | shi       | Dynamin (EC 3.6.5.5) (Protein shibire) (dDyn)                                   | 698.405 | 3 | 53.41 | 463587   | 53.25 | 477207   | 1.3372  |
| SVTETGVLSNEER           | 14-3-3zet | 14-3-3 protein zeta (14-3-3-like protein) (Protein Leonardo)                    | 775.371 | 2 | 21.6  | 716717   | 21.65 | 1301291  | 2.35857 |
| YLAEVATGDAR             | 14-3-3zet | 14-3-3 protein zeta (14-3-3-like protein) (Protein Leonardo)                    | 583.296 | 2 | 20.89 | 1053151  | 20.85 | 1412304  | 1.74205 |
| LITPVVLQR               | RpS6      | 40S ribosomal protein S6                                                        | 519.837 | 2 | 34.36 | 2782314  | 34.22 | 2911970  | 1.35957 |
| GQIHDIIVLVGGSTR         | Hsc70-1   | Heat shock 70 kDa protein cognate 1 (Heat shock 70 kDa protein 70C)             | 726.402 | 2 | 27.66 | 141880   | 27.58 | 2013950  | 18.4395 |
| GQIHDIIVLVGGSTR         | Hsc70-1   | Heat shock 70 kDa protein cognate 1 (Heat shock 70 kDa protein 70C)             | 484.604 | 3 | 27.43 | 42940    | 27.54 | 4848927  | 146.692 |
| SINPDEAVAYGAAVQAAILHGDK | Hsc70-1   | Heat shock 70 kDa protein cognate 1 (Heat shock 70 kDa protein 70C)             | 770.729 | 3 | 49.12 | 5844145  | 48.87 | 6076260  | 1.35063 |
| VEIANDQGNR              | Hsc70-1   | Heat shock 70 kDa protein cognate 1 (Heat shock 70 kDa protein 70C)             | 614.818 | 2 | 18.24 | 20421124 | 18.27 | 30231408 | 1.9231  |
| DLEAIVQPIAK             | Hsc70-3   | Endoplasmic reticulum chaperone BiP (EC 3.6.4.10) (78 kDa glucose-regulate      | 648.382 | 2 | 41.32 | 544579   | 41.07 | 1292742  | 3.08371 |
| ETAEAYLGK               | Hsc70-3   | Endoplasmic reticulum chaperone BiP (EC 3.6.4.10) (78 kDa glucose-regulate      | 491.248 | 2 | 18.78 | 1276400  | 18.74 | 1203743  | 1.22509 |
| IEIESFFEGDDFSETLTR      | Hsc70-3   | Endoplasmic reticulum chaperone BiP (EC 3.6.4.10) (78 kDa glucose-regulate      | 1067.99 | 2 | 52.47 | 497399   | 52.17 | 1038290  | 2.71167 |
| ITPSYVAFTADGER          | Hsc70-3   | Endoplasmic reticulum chaperone BiP (EC 3.6.4.10) (78 kDa glucose-regulate      | 763.878 | 2 | 32.4  | 751662   | 32.33 | 1189631  | 2.05595 |
| IVITNDQNR               | Hsc70-3   | Endoplasmic reticulum chaperone BiP (EC 3.6.4.10) (78 kDa glucose-regulate      | 536.791 | 2 | 14.68 | 403680   | 14.64 | 383242   | 1.23327 |
| NQLTTNPENTVFDKAK        | Hsc70-3   | Endoplasmic reticulum chaperone BiP (EC 3.6.4.10) (78 kDa glucose-regulate      | 846.415 | 2 | 29.52 | 625548   | 29.44 | 1240840  | 2.57678 |
| NSKPHISVDTSQGAK         | Hsc70-3   | Endoplasmic reticulum chaperone BiP (EC 3.6.4.10) (78 kDa glucose-regulate      | 523.606 | 3 | 12.41 | 133543   | 12.4  | 255862   | 2.4889  |
| VEIANDQGNR              | Hsc70-3   | Endoplasmic reticulum chaperone BiP (EC 3.6.4.10) (78 kDa glucose-regulate      | 614.818 | 2 | 18.24 | 20421124 | 18.27 | 30231408 | 1.9231  |
| GSTGTLGNFAK             | RpS2      | 40S ribosomal protein S2 (Protein strings of pearls)                            | 526.772 | 2 | 21.67 | 1400654  | 21.69 | 1849774  | 1.71558 |
| GTGIVSAPVPK             | RpS2      | 40S ribosomal protein S2 (Protein strings of pearls)                            | 513.303 | 2 | 23.48 | 3393633  | 23.45 | 3953923  | 1.51351 |
| TYAYLTPDLWK             | RpS2      | 40S ribosomal protein S2 (Protein strings of pearls)                            | 685.853 | 2 | 43.29 | 689942   | 43.09 | 916755   | 1.72609 |
| AVVQVFEFTSGIDAK         | Vha55     | V-type proton ATPase subunit B (V-ATPase subunit B) (V-ATPase 55 kDa sul        | 760.901 | 2 | 33.68 | 936310   | 33.53 | 864164   | 1.19894 |
| DFISQPR                 | Vha55     | V-type proton ATPase subunit B (V-ATPase subunit B) (V-ATPase 55 kDa sul        | 431.725 | 2 | 20.36 | 908159   | 20.31 | 646613   | 0.92492 |
| FAEIVQLR                | Vha55     | V-type proton ATPase subunit B (V-ATPase subunit B) (V-ATPase 55 kDa sul        | 488.285 | 2 | 33.47 | 1109279  | 33.37 | 993806   | 1.16381 |
| NFISQGNENR              | Vha55     | V-type proton ATPase subunit B (V-ATPase subunit B) (V-ATPase 55 kDa sul        | 671.313 | 2 | 21.23 | 606233   | 21.27 | 286793   | 0.61454 |
| NTLCEFTGDILR            | Vha55     | V-type proton ATPase subunit B (V-ATPase subunit B) (V-ATPase 55 kDa sul        | 719.853 | 2 | 41.77 | 1059567  | 41.56 | 793668   | 0.97304 |
| TPVSEDMLGR              | Vha55     | V-type proton ATPase subunit B (V-ATPase subunit B) (V-ATPase 55 kDa sul        | 552.771 | 2 | 23.81 | 594688   | 23.84 | 576947   | 1.26029 |
| GGGGGTGEAGFEVAK         | 128up     | GTP-binding protein 128up                                                       | 647.307 | 2 | 19.38 | 145884   | 19.38 | 205028   | 1.82569 |
| APGIIPR                 | blw       | ATP synthase subunit alpha, mitochondrial (Protein bellwether)                  | 362.229 | 2 | 21.08 | 469561   | 21.05 | 342332   | 0.94706 |
| AVDSLVIPIGR             | blw       | ATP synthase subunit alpha, mitochondrial (Protein bellwether)                  | 513.801 | 2 | 31.95 | 1671855  | 31.78 | 1623913  | 1.26179 |
| GIRPAINVGLSVSR          | blw       | ATP synthase subunit alpha, mitochondrial (Protein bellwether)                  | 480.288 | 3 | 31.51 | 1433876  | 31.42 | 1687483  | 1.5288  |
| SAEISNILEER             | blw       | ATP synthase subunit alpha, mitochondrial (Protein bellwether)                  | 630.825 | 2 | 33.08 | 2084754  | 32.98 | 1607500  | 1.00166 |
| TALAITIINQK             | blw       | ATP synthase subunit alpha, mitochondrial (Protein bellwether)                  | 650.877 | 2 | 38.45 | 1344625  | 38.31 | 1054061  | 1.01833 |
| TGAIVDVPVGDPELLGR       | blw       | ATP synthase subunit alpha, mitochondrial (Protein bellwether)                  | 805.941 | 2 | 43.72 | 3128122  | 43.51 | 2122700  | 0.88151 |
| TSEQALLDTIAK            | blw       | ATP synthase subunit alpha, mitochondrial (Protein bellwether)                  | 645.351 | 2 | 35.43 | 1238241  | 35.22 | 1117479  | 1.17235 |
| VLSIGDGIAR              | blw       | ATP synthase subunit alpha, mitochondrial (Protein bellwether)                  | 500.793 | 2 | 29.32 | 2412863  | 29.21 | 2038012  | 1.09723 |
| VVDALGNAIDGK            | blw       | ATP synthase subunit alpha, mitochondrial (Protein bellwether)                  | 586.32  | 2 | 27.28 | 1696010  | 27.19 | 1089828  | 0.83474 |
| HVVEQVHEEQER            | Prm       | Paramyosin, long form                                                           | 506.915 | 3 | 9.49  | 191473   | 9.59  | 475223   | 3.22413 |
| HHVEQVHEEQER            | Prm       | Paramyosin, short form (Miniparamyosin)                                         | 506.915 | 3 | 9.49  | 191473   | 9.59  | 475223   | 3.22413 |
| AAEFNFR                 | wupA      | Troponin I (Tn I) (Protein heldup) (Protein wings apart-A)                      | 427.711 | 2 | 24.96 | 9042040  | 24.95 | 9905750  | 1.42313 |
| GFMTPER                 | wupA      | Troponin I (Tn I) (Protein heldup) (Protein wings apart-A)                      | 419.2   | 2 | 19.67 | 1284815  | 19.67 | 1246317  | 1.26012 |
| AIVADNPSPDIFVISSRPIGQR  | sta       | 40S ribosomal protein SA (K14) (Laminin receptor homolog) (Protein stubarist    | 790.104 | 3 | 47.14 | 1850721  | 46.91 | 2154167  | 1.51203 |
| YTDTTPIAGR              | sta       | 40S ribosomal protein SA (K14) (Laminin receptor homolog) (Protein stubarist    | 547.777 | 2 | 16.67 | 622037   | 16.64 | 752509   | 1.57151 |
| ALQALEHAR               | RpS19a    | 40S ribosomal protein S19a                                                      | 504.783 | 2 | 16.22 | 955156   | 16.18 | 893690   | 1.21544 |
| DIDQHAVTK               | RpS19a    | 40S ribosomal protein S19a                                                      | 513.764 | 2 | 10.4  | 2341073  | 10.53 | 719059   | 0.399   |
| IANQIVFK                | RpS19a    | 40S ribosomal protein S19a                                                      | 466.782 | 2 | 26.32 | 23319114 | 26.31 | 14069064 | 0.78375 |
| LSSIGQR                 | RpS19a    | 40S ribosomal protein S19a                                                      | 380.719 | 2 | 11.74 | 2374571  | 11.84 | 1340591  | 0.73339 |
| QTGPVIVSK               | RpS19a    | 40S ribosomal protein S19a                                                      | 471.785 | 2 | 20.97 | 7892233  | 20.97 | 6770915  | 1.11447 |
| SPAGVGSITK              | RpS19a    | 40S ribosomal protein S19a                                                      | 458.759 | 2 | 15.88 | 11010122 | 15.86 | 5559005  | 0.65588 |
| DSQGHVFATR              | RpS4      | 40S ribosomal protein S4                                                        | 373.184 | 3 | 13.5  | 848798   | 13.47 | 498993   | 0.76368 |
| ESLPLLIPLR              | RpS4      | 40S ribosomal protein S4                                                        | 600.871 | 2 | 59.87 | 978242   | 59.6  | 249332   | 0.3311  |
| GNKPYISLPK              | RpS4      | 40S ribosomal protein S4                                                        | 372.885 | 3 | 24.24 | 1063638  | 24.28 | 968662   | 1.18304 |



|                           |           |                                                                                      |         |   |       |          |       |          |         |
|---------------------------|-----------|--------------------------------------------------------------------------------------|---------|---|-------|----------|-------|----------|---------|
| GVPFLVTHDGR               | RpS4      | 40S ribosomal protein S4                                                             | 599.322 | 2 | 29.44 | 2161831  | 29.36 | 2769935  | 1.66445 |
| LGGVFAPRPSTGPHK           | RpS4      | 40S ribosomal protein S4                                                             | 507.616 | 3 | 20.14 | 336675   | 20.13 | 222325   | 0.85783 |
| LGGVFAPRPSTGPHK           | RpS4      | 40S ribosomal protein S4                                                             | 380.964 | 4 | 20.18 | 928142   | 20.13 | 480847   | 0.673   |
| LSIAEER                   | RpS4      | 40S ribosomal protein S4                                                             | 409.224 | 2 | 17.33 | 1731761  | 17.37 | 1338598  | 1.00412 |
| LTNVFIIGK                 | RpS4      | 40S ribosomal protein S4                                                             | 502.811 | 2 | 37.72 | 3811188  | 37.56 | 3884472  | 1.32402 |
| TGEFFR                    | RpS4      | 40S ribosomal protein S4                                                             | 378.687 | 2 | 22.32 | 2231185  | 22.28 | 2138263  | 1.24494 |
| VGTVVNR                   | RpS4      | 40S ribosomal protein S4                                                             | 372.722 | 2 | 10.66 | 487079   | 10.77 | 324263   | 0.86481 |
| AAAPAAVASPAAAATSADASPSAI  | Pep       | Zinc finger protein on ecdysone puffs                                                | 708.031 | 3 | 24.27 | 491341   | 24.2  | 1065912  | 2.81813 |
| FFDTEVTAEIHSR             | Pep       | Zinc finger protein on ecdysone puffs                                                | 517.919 | 3 | 32.02 | 935298   | 31.86 | 1657140  | 2.30161 |
| NQNPPSLDLPR               | Pep       | Zinc finger protein on ecdysone puffs                                                | 682.37  | 2 | 37.75 | 928013   | 37.52 | 1703500  | 2.38457 |
| HYWGLR                    | RpS18     | 40S ribosomal protein S18                                                            | 416.217 | 2 | 21.34 | 2947345  | 21.35 | 3139903  | 1.38391 |
| VPNWFLNR                  | RpS18     | 40S ribosomal protein S18                                                            | 523.283 | 2 | 37.87 | 5287080  | 37.68 | 4566158  | 1.12191 |
| YSNIVLK                   | RpS18     | 40S ribosomal protein S18                                                            | 418.747 | 2 | 22.31 | 2725895  | 22.28 | 2149680  | 1.02444 |
| LVTIDEADLAR               | eIF2alpha | Eukaryotic translation initiation factor 2 subunit 1 (Eukaryotic translation initiat | 643.851 | 2 | 31.83 | 315858   | 31.67 | 469918   | 1.93265 |
| AVFPSIVGRPR               | Arp53D    | Actin-like protein 53D                                                               | 599.856 | 2 | 30.18 | 3527039  | 29.97 | 6233553  | 2.29587 |
| AEIILER                   | RpL11     | 60S ribosomal protein L11                                                            | 430.23  | 2 | 17.53 | 3556219  | 17.53 | 2139819  | 0.78165 |
| IAVHCTVR                  | RpL11     | 60S ribosomal protein L11                                                            | 478.261 | 2 | 12.42 | 1451582  | 12.46 | 1036746  | 0.9278  |
| SGTVGFQHR                 | RpL11     | 60S ribosomal protein L11                                                            | 494.752 | 2 | 11.45 | 1263829  | 11.54 | 829082   | 0.85218 |
| VLEQLTGQQPVFSK            | RpL11     | 60S ribosomal protein L11                                                            | 787.433 | 2 | 33.08 | 9876999  | 32.94 | 10033931 | 1.31968 |
| YDPSIGIYGLDFYVVLGRPGYNVNH | RpL11     | 60S ribosomal protein L11                                                            | 746.882 | 4 | 53.64 | 810217   | 53.57 | 534216   | 0.85652 |
| NFSGAELEGLVR              | comt      | Vesicle-fusing ATPase 1 (EC 3.6.4.6) (N-ethylmaleimide-sensitive fusion prote        | 646.336 | 2 | 38.11 | 673204   | 37.95 | 671954   | 1.29663 |
| TVEVPSGYVGFSLVQR          | comt      | Vesicle-fusing ATPase 1 (EC 3.6.4.6) (N-ethylmaleimide-sensitive fusion prote        | 869.462 | 2 | 42.95 | 482529   | 43.06 | 1159918  | 3.12267 |
| CGVISPR                   | RpS15Aa   | 40S ribosomal protein S15Aa                                                          | 394.708 | 2 | 13.98 | 622408   | 13.82 | 550921   | 1.14984 |
| FDVPINDIEK                | RpS15Aa   | 40S ribosomal protein S15Aa                                                          | 595.309 | 2 | 35.12 | 6034878  | 34.98 | 2750801  | 0.59212 |
| HGYIGFEIIVDDHR            | RpS15Aa   | 40S ribosomal protein S15Aa                                                          | 562.934 | 3 | 31.11 | 2707218  | 31.08 | 907855   | 0.43563 |
| MNVLADALK                 | RpS15Aa   | 40S ribosomal protein S15Aa                                                          | 487.771 | 2 | 34.9  | 1815269  | 34.78 | 1716352  | 1.22825 |
| QFGYVVLTTSGGIMDHEEAR      | RpS15Aa   | 40S ribosomal protein S15Aa                                                          | 737.356 | 3 | 39.87 | 1542845  | 39.68 | 2090883  | 1.76047 |
| WTNNLLPSR                 | RpS15Aa   | 40S ribosomal protein S15Aa                                                          | 550.796 | 2 | 30.38 | 2286379  | 30.28 | 1280460  | 0.72751 |
| ECADLWPR                  | RpL23     | 60S ribosomal protein L23 (L17A)                                                     | 523.74  | 2 | 28.3  | 1947834  | 28.17 | 1933021  | 1.28916 |
| GSAITGPVAK                | RpL23     | 60S ribosomal protein L23 (L17A)                                                     | 450.761 | 2 | 15.45 | 462972   | 15.4  | 267152   | 0.74959 |
| ISLGLPVGAVMNCADNTGAK      | RpL23     | 60S ribosomal protein L23 (L17A)                                                     | 994.501 | 2 | 44.45 | 1252962  | 44.18 | 868781   | 0.90073 |
| LPAAGVGDMFVATVK           | RpL23     | 60S ribosomal protein L23 (L17A)                                                     | 738.4   | 2 | 42.18 | 1470091  | 42.02 | 283589   | 0.25059 |
| LPAAGVGDMFVATVK           | RpL23     | 60S ribosomal protein L23 (L17A)                                                     | 746.397 | 2 | 34.67 | 839242   | 34.53 | 345373   | 0.53459 |
| NLYVIAVHGIR               | RpL23     | 60S ribosomal protein L23 (L17A)                                                     | 627.869 | 2 | 34.45 | 2973190  | 34.35 | 2192327  | 0.95787 |
| NLYVIAVHGIR               | RpL23     | 60S ribosomal protein L23 (L17A)                                                     | 418.915 | 3 | 34.45 | 3228524  | 34.42 | 2192238  | 0.88208 |
| ALIELR                    | RpS25     | 40S ribosomal protein S25                                                            | 357.729 | 2 | 28.69 | 15719181 | 28.59 | 8354136  | 0.69039 |
| LITPSVVSER                | RpS25     | 40S ribosomal protein S25                                                            | 550.819 | 2 | 27.29 | 60807344 | 27.24 | 36641056 | 0.78277 |
| LNNQVLFDK                 | RpS25     | 40S ribosomal protein S25                                                            | 545.798 | 2 | 26.51 | 3604080  | 26.46 | 2295710  | 0.82746 |
| QVVQHHSQVIYTR             | RpS25     | 40S ribosomal protein S25                                                            | 797.926 | 2 | 13.04 | 476611   | 12.99 | 214076   | 0.58348 |
| QVVQHHSQVIYTR             | RpS25     | 40S ribosomal protein S25                                                            | 532.286 | 3 | 13.04 | 7237669  | 12.99 | 4618453  | 0.82893 |
| LLLGGLGENPDR              | Pu        | GTP cyclohydrolase 1 (EC 3.5.4.16) (GTP cyclohydrolase I) (GTP-CH-I) (Prot           | 627.346 | 2 | 34.9  | 431350   | 34.7  | 325871   | 0.98138 |
| TAVETAILLLR               | CCT3      | T-complex protein 1 subunit gamma (TCP-1-gamma) (CCT-gamma) (Chaperc                 | 600.372 | 2 | 46.75 | 1365542  | 46.61 | 617422   | 0.58735 |
| TLAQCNGANTIR              | CCT3      | T-complex protein 1 subunit gamma (TCP-1-gamma) (CCT-gamma) (Chaperc                 | 659.83  | 2 | 15.65 | 496704   | 15.59 | 376804   | 0.98546 |
| VFLGGLPSNVETDLR           | Hrb27C    | Heterogeneous nuclear ribonucleoprotein 27C (Hrb27-C) (HRP48.1) (hnRNP               | 859.46  | 2 | 41.76 | 616996   | 41.61 | 670475   | 1.41164 |
| LSEASQAADER               | Tm1       | Tropomyosin-1, isoforms 33/34 (Tropomyosin II)                                       | 696.816 | 2 | 11.57 | 343010   | 11.67 | 695696   | 2.63472 |
| AVYAHFPINCVTSENNTVIEIR    | RpL9      | 60S ribosomal protein L9                                                             | 849.76  | 3 | 40.81 | 1781795  | 40.62 | 1413499  | 1.03053 |
| FLDGLYVSEK                | RpL9      | 60S ribosomal protein L9                                                             | 585.806 | 2 | 35.92 | 3763738  | 35.78 | 4648290  | 1.60434 |
| GVTFGFYK                  | RpL9      | 60S ribosomal protein L9                                                             | 523.769 | 2 | 33.76 | 1916061  | 33.65 | 1180316  | 0.80022 |
| TVCSHIENMIK               | RpL9      | 60S ribosomal protein L9                                                             | 666.326 | 2 | 25.86 | 3049601  | 26.46 | 614101   | 0.26159 |
| VVTITGTR                  | RpL9      | 60S ribosomal protein L9                                                             | 423.756 | 2 | 16.63 | 6749408  | 16.64 | 3559419  | 0.68507 |
| VNNLGNNTVFER              | RpL22     | 60S ribosomal protein L22                                                            | 688.849 | 2 | 24.51 | 774262   | 24.48 | 737556   | 1.23745 |
| AGFAGDDAPR                | Act57B    | Actin-57B                                                                            | 488.728 | 2 | 15.06 | 5346544  | 15.03 | 6072874  | 1.47551 |
| AVFPSIVGRPR               | Act57B    | Actin-57B                                                                            | 599.856 | 2 | 30.18 | 3527039  | 29.97 | 6233553  | 2.29587 |

|                            |          |                                                                               |         |   |       |          |       |          |         |
|----------------------------|----------|-------------------------------------------------------------------------------|---------|---|-------|----------|-------|----------|---------|
| DSYVGDEAQS                 | Act57B   | Actin-57B                                                                     | 599.765 | 2 | 11.94 | 533801   | 12.02 | 513658   | 1.25002 |
| EITSLAPSTIK                | Act57B   | Actin-57B                                                                     | 580.332 | 2 | 28.08 | 2654634  | 28    | 4111213  | 2.01181 |
| IWHHTFYNELR                | Act57B   | Actin-57B                                                                     | 505.921 | 3 | 25.48 | 1669489  | 25.49 | 2792816  | 2.17311 |
| SYELPDGQVITIGNER           | Act57B   | Actin-57B                                                                     | 895.95  | 2 | 39.17 | 5791673  | 39    | 8517636  | 1.91046 |
| SYELPDGQVITIGNER           | Act57B   | Actin-57B                                                                     | 597.635 | 3 | 39.17 | 427938   | 38.97 | 800279   | 2.42931 |
| TTGIVLDSGDGVSHTVPIYEGYALPI | Act57B   | Actin-57B                                                                     | 1051.22 | 3 | 45.78 | 1749429  | 45.58 | 1016220  | 0.75459 |
| VAPEEHPVLLTEAPLNPK         | Act57B   | Actin-57B                                                                     | 977.536 | 2 | 34.25 | 620752   | 34.11 | 748708   | 1.56681 |
| VAPEEHPVLLTEAPLNPK         | Act57B   | Actin-57B                                                                     | 652.026 | 3 | 34.21 | 12031327 | 34.11 | 16999678 | 1.83548 |
| SVYAAEER                   | Mlp60A   | Muscle LIM protein 1                                                          | 462.725 | 2 | 11.82 | 2588129  | 11.89 | 1417299  | 0.71137 |
| NFSGAELEGLVR               | Nsf2     | Vesicle-fusing ATPase 2 (EC 3.6.4.6) (N-ethylmaleimide-sensitive fusion prote | 646.336 | 2 | 38.11 | 673204   | 37.95 | 671954   | 1.29663 |
| EAIVPFVPIFVEEADVIQGA       | eas      | Ethanolamine kinase (EK) (EC 2.7.1.82) (Protein easily shocked)               | 757.747 | 3 | 63.84 | 23869    | 61.84 | 116025   | 6.31451 |
| HPQLLYEAK                  | Cklalpha | Casein kinase I isoform alpha (CKI-alpha) (DmCK1) (EC 2.7.11.1)               | 549.801 | 2 | 20.1  | 592902   | 20.09 | 726533   | 1.59182 |
| ILSGGVGFPR                 | Cklalpha | Casein kinase I isoform alpha (CKI-alpha) (DmCK1) (EC 2.7.11.1)               | 501.79  | 2 | 30.56 | 792616   | 30.4  | 1109698  | 1.81871 |
| YASINAHLGIEQSR             | Cklalpha | Casein kinase I isoform alpha (CKI-alpha) (DmCK1) (EC 2.7.11.1)               | 520.271 | 3 | 26.21 | 386181   | 26.15 | 468938   | 1.57742 |
| DAGNYEMITGYR               | Gdh      | Glutamate dehydrogenase, mitochondrial (GDH) (EC 1.4.1.3)                     | 695.309 | 2 | 29.45 | 100199   | 29.4  | 312114   | 4.04643 |
| DAGNYEMITGYR               | Gdh      | Glutamate dehydrogenase, mitochondrial (GDH) (EC 1.4.1.3)                     | 703.306 | 2 | 24.32 | 326038   | 24.28 | 360863   | 1.43779 |
| TFIVQGFGNVGLHTTR           | Gdh      | Glutamate dehydrogenase, mitochondrial (GDH) (EC 1.4.1.3)                     | 582.981 | 3 | 38.87 | 1874134  | 38.58 | 1474266  | 1.02187 |
| DIEKPHVGDASVHR             | RpS20    | 40S ribosomal protein S20                                                     | 549.613 | 3 | 14.1  | 1789285  | 14.02 | 1270258  | 0.92222 |
| DIEKPHVGDASVHR             | RpS20    | 40S ribosomal protein S20                                                     | 412.462 | 4 | 14.1  | 4796295  | 14.02 | 4014507  | 1.0873  |
| IIDLHSPSEIVK               | RpS20    | 40S ribosomal protein S20                                                     | 675.885 | 2 | 30.68 | 1548028  | 30.56 | 1816547  | 1.52437 |
| IIDLHSPSEIVK               | RpS20    | 40S ribosomal protein S20                                                     | 450.926 | 3 | 30.68 | 6406697  | 30.52 | 7870892  | 1.59592 |
| ITSINIEPGVEVEVTIAN         | RpS20    | 40S ribosomal protein S20                                                     | 949.509 | 2 | 47.39 | 2652750  | 47.09 | 1755529  | 0.85967 |
| SLENVCR                    | RpS20    | 40S ribosomal protein S20                                                     | 439.213 | 2 | 13.35 | 4815301  | 13.38 | 2341853  | 0.63177 |
| APNMFQTR                   | RpS3A    | 40S ribosomal protein S3a (C3 protein)                                        | 482.737 | 2 | 21.15 | 426234   | 21.11 | 434247   | 1.32346 |
| LIAEDVQDR                  | RpS3A    | 40S ribosomal protein S3a (C3 protein)                                        | 529.777 | 2 | 18.13 | 939103   | 18.16 | 256307   | 0.35454 |
| LLELHGDGGGK                | RpS3A    | 40S ribosomal protein S3a (C3 protein)                                        | 548.293 | 2 | 18.13 | 889316   | 17.98 | 301503   | 0.44041 |
| MTDIITNEVSGADLK            | RpS3A    | 40S ribosomal protein S3a (C3 protein)                                        | 803.903 | 2 | 35.24 | 1723290  | 35.03 | 1709836  | 1.2889  |
| SVEAVVSSEGAVIDRPEGYEPPVQI  | RpS3A    | 40S ribosomal protein S3a (C3 protein)                                        | 938.466 | 3 | 40.14 | 2946991  | 39.92 | 2515191  | 1.1087  |
| TVDGYLLR                   | RpS3A    | 40S ribosomal protein S3a (C3 protein)                                        | 468.761 | 2 | 27.97 | 1377497  | 27.93 | 1215401  | 1.14618 |
| VFEVSLADLQK                | RpS3A    | 40S ribosomal protein S3a (C3 protein)                                        | 624.845 | 2 | 40.52 | 2741802  | 40.31 | 2030446  | 0.96201 |
| VVDPFSSR                   | RpS3A    | 40S ribosomal protein S3a (C3 protein)                                        | 410.222 | 2 | 25.97 | 1581151  | 25.91 | 1298337  | 1.06669 |
| WQTLIEAIVEAK               | RpS3A    | 40S ribosomal protein S3a (C3 protein)                                        | 700.893 | 2 | 52.94 | 1141760  | 52.82 | 1124334  | 1.27921 |
| LVAIVDVIDQNR               | RpL14    | 60S ribosomal protein L14                                                     | 677.888 | 2 | 42.05 | 2697914  | 41.86 | 1953720  | 0.94071 |
| VLVDGPLTGVPR               | RpL14    | 60S ribosomal protein L14                                                     | 611.861 | 2 | 34.44 | 2925516  | 34.3  | 1598894  | 0.70997 |
| IIGEYGLR                   | RpS9     | 40S ribosomal protein S9                                                      | 460.764 | 2 | 25.97 | 1566590  | 25.94 | 2123615  | 1.76093 |
| LFQGNALLR                  | RpS9     | 40S ribosomal protein S9                                                      | 516.303 | 2 | 32.83 | 1000199  | 32.72 | 375882   | 0.48819 |
| ALTVPCLTQQMFDK             | betaTub8 | Tubulin beta-2 chain (Beta-2-tubulin)                                         | 854.435 | 2 | 37.81 | 1590296  | 37.56 | 1317924  | 1.07655 |
| GHYTEGAELVDSVLDVVR         | betaTub8 | Tubulin beta-2 chain (Beta-2-tubulin)                                         | 653.665 | 3 | 50.34 | 2775420  | 50.24 | 1100574  | 0.51513 |
| LAVNMVFPFR                 | betaTub8 | Tubulin beta-2 chain (Beta-2-tubulin)                                         | 572.321 | 2 | 40.41 | 1793279  | 40.19 | 932227   | 0.6753  |
| LAVNMVFPFR                 | betaTub8 | Tubulin beta-2 chain (Beta-2-tubulin)                                         | 580.318 | 2 | 34.29 | 768535   | 34.41 | 1250344  | 2.11343 |
| LHFFMPGFAPLTSR             | betaTub8 | Tubulin beta-2 chain (Beta-2-tubulin)                                         | 540.95  | 3 | 48.83 | 2785496  | 48.88 | 1571753  | 0.733   |
| LHFFMPGFAPLTSR             | betaTub8 | Tubulin beta-2 chain (Beta-2-tubulin)                                         | 546.282 | 3 | 42.62 | 1500055  | 42.47 | 820442   | 0.7105  |
| YLTVAAIFR                  | betaTub8 | Tubulin beta-2 chain (Beta-2-tubulin)                                         | 527.308 | 2 | 45.1  | 10561950 | 44.89 | 6760614  | 0.8315  |
| DAGHIAGLNVLR               | Hsp70Aa  | Major heat shock 70 kDa protein Aa (Heat shock protein 70Aa) (HSP70-87A7      | 618.346 | 2 | 31.67 | 40614    | 31.54 | 13040718 | 417.108 |
| DAGHIAGLNVLR               | Hsp70Aa  | Major heat shock 70 kDa protein Aa (Heat shock protein 70Aa) (HSP70-87A7      | 412.567 | 3 | 31.59 | 26572    | 31.54 | 33980956 | 1661.24 |
| DNNALGTFDLSGIPPAPR         | Hsp70Aa  | Major heat shock 70 kDa protein Aa (Heat shock protein 70Aa) (HSP70-87A7      | 927.971 | 2 | 45.07 | 166587   | 43.39 | 30976200 | 241.551 |
| DNNALGTFDLSGIPPAPR         | Hsp70Aa  | Major heat shock 70 kDa protein Aa (Heat shock protein 70Aa) (HSP70-87A7      | 618.983 | 3 | 45.21 | 24051    | 43.65 | 6711729  | 362.513 |
| ETAEAYLGESITDAVITVPAYFNDSC | Hsp70Aa  | Major heat shock 70 kDa protein Aa (Heat shock protein 70Aa) (HSP70-87A7      | 987.477 | 3 | 58.6  | 304104   | 58.36 | 1308713  | 5.59042 |
| FAPEEISSMVLTK              | Hsp70Aa  | Major heat shock 70 kDa protein Aa (Heat shock protein 70Aa) (HSP70-87A7      | 726.376 | 2 | 41.77 | 22231    | 41.79 | 11132469 | 650.511 |
| FAPEEISSMVLTK              | Hsp70Aa  | Major heat shock 70 kDa protein Aa (Heat shock protein 70Aa) (HSP70-87A7      | 484.587 | 3 | 41.77 | 0        | 41.79 | 276280   | #DIV/0! |
| FAPEEISSMVLTK              | Hsp70Aa  | Major heat shock 70 kDa protein Aa (Heat shock protein 70Aa) (HSP70-87A7      | 734.374 | 2 | 35.12 | 297494   | 34.86 | 2047640  | 8.94124 |
| FEELCADLFR                 | Hsp70Aa  | Major heat shock 70 kDa protein Aa (Heat shock protein 70Aa) (HSP70-87A7      | 650.306 | 2 | 41.55 | 32123    | 41.36 | 4667637  | 188.757 |
| GQIHDIIVLVGGSTR            | Hsp70Aa  | Major heat shock 70 kDa protein Aa (Heat shock protein 70Aa) (HSP70-87A7      | 726.402 | 2 | 27.66 | 141880   | 27.58 | 2013950  | 18.4395 |

|                            |           |                                                                             |         |   |       |          |       |           |         |
|----------------------------|-----------|-----------------------------------------------------------------------------|---------|---|-------|----------|-------|-----------|---------|
| GQIHDIIVLVGGSTR            | Hsp70Aa   | Major heat shock 70 kDa protein Aa (Heat shock protein 70Aa) (HSP70-87A7    | 484.604 | 3 | 27.43 | 42940    | 27.54 | 4848927   | 146.692 |
| HCSPIMTK                   | Hsp70Aa   | Major heat shock 70 kDa protein Aa (Heat shock protein 70Aa) (HSP70-87A7    | 487.233 | 2 | 11.2  | 35165    | 11.25 | 2786296   | 102.929 |
| HCSPIMTK                   | Hsp70Aa   | Major heat shock 70 kDa protein Aa (Heat shock protein 70Aa) (HSP70-87A7    | 495.231 | 2 | 9.26  | 11777    | 9.24  | 218205    | 24.0687 |
| IQDVLLVDVAPLSLGIETAGGVMTK  | Hsp70Aa   | Major heat shock 70 kDa protein Aa (Heat shock protein 70Aa) (HSP70-87A7    | 1270.21 | 2 | 61.32 | 0        | 61.17 | 571901    | #DIV/0! |
| IQDVLLVDVAPLSLGIETAGGVMTK  | Hsp70Aa   | Major heat shock 70 kDa protein Aa (Heat shock protein 70Aa) (HSP70-87A7    | 847.14  | 3 | 61.32 | 519      | 61.21 | 3335041   | 8347.49 |
| IQDVLLVDVAPLSLGIETAGGVMTK  | Hsp70Aa   | Major heat shock 70 kDa protein Aa (Heat shock protein 70Aa) (HSP70-87A7    | 852.472 | 3 | 57.66 | 0        | 57.38 | 359486    | #DIV/0! |
| LSQAEIDR                   | Hsp70Aa   | Major heat shock 70 kDa protein Aa (Heat shock protein 70Aa) (HSP70-87A7    | 466.246 | 2 | 14.26 | 24538    | 14.28 | 4887219   | 258.729 |
| NALESYVFNVK                | Hsp70Aa   | Major heat shock 70 kDa protein Aa (Heat shock protein 70Aa) (HSP70-87A7    | 642.335 | 2 | 40.6  | 35451    | 38.81 | 48323708  | 1770.74 |
| NLNLSINPDEAVAYGAAVQAAILSGI | Hsp70Aa   | Major heat shock 70 kDa protein Aa (Heat shock protein 70Aa) (HSP70-87A7    | 1493.76 | 2 | 58.87 | 44314    | 57.77 | 661805    | 19.4004 |
| NLNLSINPDEAVAYGAAVQAAILSGI | Hsp70Aa   | Major heat shock 70 kDa protein Aa (Heat shock protein 70Aa) (HSP70-87A7    | 996.175 | 3 | 58.34 | 121646   | 57.81 | 3315510   | 35.4058 |
| NQVAMNPR                   | Hsp70Aa   | Major heat shock 70 kDa protein Aa (Heat shock protein 70Aa) (HSP70-87A7    | 465.235 | 2 | 11.74 | 204889   | 11.84 | 365105    | 2.31484 |
| STAGDTHLGGEDFDNR           | Hsp70Aa   | Major heat shock 70 kDa protein Aa (Heat shock protein 70Aa) (HSP70-87A7    | 846.366 | 2 | 18.67 | 1657789  | 18.65 | 1831600   | 1.43524 |
| STAGDTHLGGEDFDNR           | Hsp70Aa   | Major heat shock 70 kDa protein Aa (Heat shock protein 70Aa) (HSP70-87A7    | 564.58  | 3 | 18.67 | 10781481 | 18.68 | 14815577  | 1.7851  |
| TFSTYADNQPGVSIQVYEGER      | Hsp70Aa   | Major heat shock 70 kDa protein Aa (Heat shock protein 70Aa) (HSP70-87A7    | 787.705 | 3 | 34.9  | 43097    | 34.9  | 7443709   | 224.37  |
| TLSSSTEATIEIDALFEGQDFYTK   | Hsp70Aa   | Major heat shock 70 kDa protein Aa (Heat shock protein 70Aa) (HSP70-87A7    | 1333.64 | 2 | 55.81 | 30514    | 54.36 | 4199024   | 178.76  |
| TLSSSTEATIEIDALFEGQDFYTK   | Hsp70Aa   | Major heat shock 70 kDa protein Aa (Heat shock protein 70Aa) (HSP70-87A7    | 889.429 | 3 | 55.66 | 365012   | 54.36 | 14991373  | 53.3527 |
| TPPSYVAFTDSER              | Hsp70Aa   | Major heat shock 70 kDa protein Aa (Heat shock protein 70Aa) (HSP70-87A7    | 737.346 | 2 | 28.48 | 159128   | 28.32 | 60403172  | 493.101 |
| TPPSYVAFTDSER              | Hsp70Aa   | Major heat shock 70 kDa protein Aa (Heat shock protein 70Aa) (HSP70-87A7    | 491.9   | 3 | 28.44 | 0        | 28.4  | 323797    | #DIV/0! |
| VIIANDQNR                  | Hsp70Aa   | Major heat shock 70 kDa protein Aa (Heat shock protein 70Aa) (HSP70-87A7    | 614.818 | 2 | 18.24 | 20421124 | 18.27 | 30231408  | 1.9231  |
| VQSLLQDFFHGK               | Hsp70Aa   | Major heat shock 70 kDa protein Aa (Heat shock protein 70Aa) (HSP70-87A7    | 709.875 | 2 | 45.25 | 30856    | 45.28 | 4190765   | 176.431 |
| VQSLLQDFFHGK               | Hsp70Aa   | Major heat shock 70 kDa protein Aa (Heat shock protein 70Aa) (HSP70-87A7    | 473.586 | 3 | 45.21 | 0        | 45.24 | 14899044  | #DIV/0! |
| AGFAGDDAPR                 | Act88F    | Actin, indirect flight muscle (Actin-88F)                                   | 488.728 | 2 | 15.06 | 5346544  | 15.03 | 6072874   | 1.47551 |
| AVFPSIVGRPR                | Act88F    | Actin, indirect flight muscle (Actin-88F)                                   | 599.856 | 2 | 30.18 | 3527039  | 29.97 | 6233553   | 2.29587 |
| DSYVGDEAQS                 | Act88F    | Actin, indirect flight muscle (Actin-88F)                                   | 599.765 | 2 | 11.94 | 533801   | 12.02 | 513658    | 1.25002 |
| IWHHTFYNELR                | Act88F    | Actin, indirect flight muscle (Actin-88F)                                   | 505.921 | 3 | 25.48 | 1669489  | 25.49 | 2792816   | 2.17311 |
| SYELPDGQVITIGNER           | Act88F    | Actin, indirect flight muscle (Actin-88F)                                   | 895.95  | 2 | 39.17 | 5791673  | 39    | 8517636   | 1.91046 |
| SYELPDGQVITIGNER           | Act88F    | Actin, indirect flight muscle (Actin-88F)                                   | 597.635 | 3 | 39.17 | 427938   | 38.97 | 800279    | 2.42931 |
| VAPEEHPVLLTEAPLNPK         | Act88F    | Actin, indirect flight muscle (Actin-88F)                                   | 977.536 | 2 | 34.25 | 620752   | 34.11 | 748708    | 1.56681 |
| VAPEEHPVLLTEAPLNPK         | Act88F    | Actin, indirect flight muscle (Actin-88F)                                   | 652.026 | 3 | 34.21 | 12031327 | 34.11 | 16999678  | 1.83548 |
| DAVITYTEHAK                | His4      | Histone H4                                                                  | 567.775 | 2 | 11.73 | 1744246  | 11.83 | 635649    | 0.4734  |
| DNIQGITKPAIR               | His4      | Histone H4                                                                  | 442.589 | 3 | 22.72 | 3459819  | 22.72 | 2375618   | 0.89196 |
| ISGLIYEETR                 | His4      | Histone H4                                                                  | 590.814 | 2 | 28.26 | 8240435  | 28.2  | 5262581   | 0.8296  |
| VFLENVIR                   | His4      | Histone H4                                                                  | 495.293 | 2 | 37.01 | 7324526  | 36.84 | 3166374   | 0.56157 |
| AGLQFPVGR                  | His2A     | Histone H2A                                                                 | 472.769 | 2 | 31.56 | 98633592 | 31.42 | 106838928 | 1.40711 |
| HLQLAIR                    | His2A     | Histone H2A                                                                 | 425.767 | 2 | 22.72 | 21451580 | 22.66 | 9817742   | 0.59453 |
| LLSGVTIAQGGVLPNIQAVLLPK    | His2A     | Histone H2A                                                                 | 1151.2  | 2 | 58.27 | 5972554  | 58.05 | 3630529   | 0.78965 |
| LLSGVTIAQGGVLPNIQAVLLPK    | His2A     | Histone H2A                                                                 | 767.802 | 3 | 58.3  | 10409686 | 58.05 | 8036129   | 1.00284 |
| VGAGAPVYLAAVMEYLAAEVLELAC  | His2A     | Histone H2A                                                                 | 963.844 | 3 | 65.83 | 2552861  | 65.87 | 479648    | 0.24407 |
| VGAGAPVYLAAVMEYLAAEVLELAC  | His2A     | Histone H2A                                                                 | 723.135 | 4 | 65.83 | 1259116  | 65.83 | 400141    | 0.41283 |
| VGAGAPVYLAAVMEYLAAEVLELAC  | His2A     | Histone H2A                                                                 | 969.176 | 3 | 65.67 | 521759   | 65.67 | 545456    | 1.35804 |
| FQSAAI GALQEASEAYLVGLFEDTN | His3.3A   | Histone H3.3A                                                               | 1146.57 | 3 | 65.53 | 385697   | 65.55 | 469966    | 1.58286 |
| FQSAAI GALQEASEAYLVGLFEDTN | His3.3A   | Histone H3.3A                                                               | 860.182 | 4 | 65.53 | 371217   | 65.58 | 846592    | 2.96257 |
| STELLIR                    | His3.3A   | Histone H3.3A                                                               | 416.25  | 2 | 25.89 | 5173880  | 25.9  | 6235095   | 1.56549 |
| YRPGTVALR                  | His3.3A   | Histone H3.3A                                                               | 516.801 | 2 | 17.48 | 3862821  | 17.48 | 3541424   | 1.19096 |
| ISGATTFDFIPQK              | CaMKII    | Calcium/calmodulin-dependent protein kinase type II alpha chain (CaM-kinase | 712.875 | 2 | 38.6  | 1118955  | 38.42 | 1549927   | 1.79937 |
| LVSQDNFGFDLAAVEAAK         | beta-Spec | Spectrin beta chain                                                         | 983.499 | 2 | 48.76 | 272064   | 48.5  | 351415    | 1.67792 |
| VAVVNQLAR                  | beta-Spec | Spectrin beta chain                                                         | 485.296 | 2 | 22.75 | 392366   | 22.71 | 672076    | 2.2251  |
| YATVSQDESIR                | beta-Spec | Spectrin beta chain                                                         | 610.265 | 2 | 11.39 | 127721   | 11.46 | 145286    | 1.47769 |
| AIYEQSR                    | hts       | Protein hu-li tai shao (Adducin-like protein)                               | 433.722 | 2 | 11.43 | 989317   | 11.54 | 662957    | 0.87051 |
| DATVSQAGDHVMMGAASK         | hts       | Protein hu-li tai shao (Adducin-like protein)                               | 636.293 | 3 | 17.09 | 884028   | 17.06 | 1039090   | 1.5269  |
| DGGAGASGILQLSDIVGVPVSR     | hts       | Protein hu-li tai shao (Adducin-like protein)                               | 1098.58 | 2 | 60.31 | 1852831  | 60.03 | 1591019   | 1.11548 |
| DGGAGASGILQLSDIVGVPVSR     | hts       | Protein hu-li tai shao (Adducin-like protein)                               | 732.725 | 3 | 60.31 | 7576074  | 60.03 | 5964562   | 1.02272 |
| FAAVAAAEDGAATAEK           | hts       | Protein hu-li tai shao (Adducin-like protein)                               | 746.868 | 2 | 24.97 | 13124    | 25.1  | 319707    | 31.6452 |

|                           |         |                                                                               |         |   |       |          |       |           |         |
|---------------------------|---------|-------------------------------------------------------------------------------|---------|---|-------|----------|-------|-----------|---------|
| LLDLYGWTQGLGAQITAR        | hts     | Protein hu-li tai shao (Adducin-like protein)                                 | 988.534 | 2 | 53.56 | 2279326  | 53.29 | 1565566   | 0.89225 |
| LLDLYGWTQGLGAQITAR        | hts     | Protein hu-li tai shao (Adducin-like protein)                                 | 659.358 | 3 | 53.56 | 1975907  | 53.25 | 1298057   | 0.85339 |
| LLPVGLDNLVLIPEESR         | hts     | Protein hu-li tai shao (Adducin-like protein)                                 | 626.363 | 3 | 55.71 | 938166   | 55.45 | 1069288   | 1.4806  |
| MLDNAGYR                  | hts     | Protein hu-li tai shao (Adducin-like protein)                                 | 470.221 | 2 | 16.11 | 947899   | 16.1  | 1485204   | 2.03538 |
| NDVLEPPAVVSSLGYLLEEEELFR  | hts     | Protein hu-li tai shao (Adducin-like protein)                                 | 873.778 | 3 | 65.17 | 1366923  | 64.85 | 956167    | 0.90868 |
| SHFVLHSHVHAARPDIR         | hts     | Protein hu-li tai shao (Adducin-like protein)                                 | 486.02  | 4 | 24.42 | 11051    | 23.97 | 0         | 0       |
| SSNCMVPINDIR              | hts     | Protein hu-li tai shao (Adducin-like protein)                                 | 711.329 | 2 | 24.43 | 633585   | 24.05 | 1332102   | 2.73121 |
| SVHGEYTDTFSESEAVLQAGTK    | hts     | Protein hu-li tai shao (Adducin-like protein)                                 | 824.378 | 3 | 32.37 | 929683   | 32.29 | 1063232   | 1.48565 |
| TGLLPLTK                  | hts     | Protein hu-li tai shao (Adducin-like protein)                                 | 421.771 | 2 | 32.52 | 2862087  | 32.37 | 2725569   | 1.23708 |
| TGYIYR                    | hts     | Protein hu-li tai shao (Adducin-like protein)                                 | 386.703 | 2 | 16.34 | 1779020  | 16.29 | 796815    | 0.58183 |
| VEVLETGTPDPK              | hts     | Protein hu-li tai shao (Adducin-like protein)                                 | 642.838 | 2 | 23.08 | 3487670  | 23.1  | 2329013   | 0.86748 |
| VYSATISSGLDDSLDELDSLMSGLA | hts     | Protein hu-li tai shao (Adducin-like protein)                                 | 797.385 | 4 | 54.66 | 1212756  | 54.41 | 1395124   | 1.49438 |
| ILESCHVYVGTGPR            | eIF4A   | Eukaryotic initiation factor 4A (EC 3.6.4.13) (ATP-dependent RNA helicase el  | 527.612 | 3 | 22.54 | 32536    | 22.6  | 97954     | 3.91093 |
| LGTLCDLYDTLSITQSVIFCNR    | eIF4A   | Eukaryotic initiation factor 4A (EC 3.6.4.13) (ATP-dependent RNA helicase el  | 897.444 | 3 | 65.14 | 15710    | 65.03 | 0         | 0       |
| VLITDILLAR                | eIF4A   | Eukaryotic initiation factor 4A (EC 3.6.4.13) (ATP-dependent RNA helicase el  | 557.845 | 2 | 40.07 | 957169   | 39.92 | 1532706   | 2.08014 |
| LQNLEDTNAGLNAR            | LamC    | Lamin-C (pG-IF)                                                               | 764.889 | 2 | 23.51 | 123071   | 23.45 | 281522    | 2.97152 |
| FLSQPFQVAEFTGHAGK         | ATPsynb | ATP synthase subunit beta, mitochondrial (EC 7.1.2.2)                         | 655.007 | 3 | 47.1  | 661096   | 46.95 | 927753    | 1.82301 |
| LVLEVAQHLGENTVR           | ATPsynb | ATP synthase subunit beta, mitochondrial (EC 7.1.2.2)                         | 839.468 | 2 | 34.87 | 556208   | 34.71 | 748475    | 1.74808 |
| ACYGVLR                   | RpS3    | 40S ribosomal protein S3                                                      | 419.716 | 2 | 20.14 | 3016355  | 20.13 | 2508723   | 1.08042 |
| AELNEFLTR                 | RpS3    | 40S ribosomal protein S3                                                      | 546.788 | 2 | 32.94 | 3256554  | 32.83 | 1378351   | 0.54982 |
| ELAEDGYSGVEVR             | RpS3    | 40S ribosomal protein S3                                                      | 712.339 | 2 | 24.58 | 10406436 | 24.6  | 12489490  | 1.55907 |
| FVDGLMIHSGDPCNDYVETATR    | RpS3    | 40S ribosomal protein S3                                                      | 838.374 | 3 | 33.19 | 433927   | 33.06 | 748456    | 2.24064 |
| GCEVVVSGK                 | RpS3    | 40S ribosomal protein S3                                                      | 467.737 | 2 | 13.15 | 569662   | 13.23 | 217126    | 0.49513 |
| GLCAIAQAESLR              | RpS3    | 40S ribosomal protein S3                                                      | 644.838 | 2 | 32.06 | 4032273  | 31.93 | 2480082   | 0.79898 |
| QGVVLGK                   | RpS3    | 40S ribosomal protein S3                                                      | 357.729 | 2 | 22.9  | 1613732  | 22.87 | 2249317   | 1.81068 |
| TEIIMATK                  | RpS3    | 40S ribosomal protein S3                                                      | 518.291 | 2 | 24    | 876921   | 24.27 | 939582    | 1.39186 |
| VMLPYDPK                  | RpS3    | 40S ribosomal protein S3                                                      | 481.754 | 2 | 28.33 | 612094   | 28.34 | 988565    | 2.09802 |
| VMLPYDPK                  | RpS3    | 40S ribosomal protein S3                                                      | 489.752 | 2 | 25.68 | 1125339  | 25.68 | 1698752   | 1.96096 |
| AFIVKPIPSPEVIPVIVFINPK    | rdgA    | Eye-specific diacylglycerol kinase (DAG kinase 2) (DGK 2) (Diglyceride kinase | 806.491 | 3 | 58.34 | 7861730  | 58.25 | 6537246   | 1.08019 |
| AFIVKPIPSPEVIPVIVFINPK    | rdgA    | Eye-specific diacylglycerol kinase (DAG kinase 2) (DGK 2) (Diglyceride kinase | 605.12  | 4 | 58.3  | 339552   | 58.29 | 268976    | 1.02903 |
| ALGWGGGYTDEPIGK           | rdgA    | Eye-specific diacylglycerol kinase (DAG kinase 2) (DGK 2) (Diglyceride kinase | 760.873 | 2 | 33.66 | 1454790  | 33.49 | 1166978   | 1.04204 |
| ALHEQQYSLQSVNK            | rdgA    | Eye-specific diacylglycerol kinase (DAG kinase 2) (DGK 2) (Diglyceride kinase | 525.27  | 3 | 20.1  | 844926   | 20.13 | 448176    | 0.68905 |
| FEESISYPK                 | rdgA    | Eye-specific diacylglycerol kinase (DAG kinase 2) (DGK 2) (Diglyceride kinase | 550.269 | 2 | 25.08 | 699628   | 25.06 | 249796    | 0.46381 |
| FQHLLNPR                  | rdgA    | Eye-specific diacylglycerol kinase (DAG kinase 2) (DGK 2) (Diglyceride kinase | 512.788 | 2 | 19.99 | 2182798  | 19.93 | 880908    | 0.52425 |
| GDVQVNPLEK                | rdgA    | Eye-specific diacylglycerol kinase (DAG kinase 2) (DGK 2) (Diglyceride kinase | 549.793 | 2 | 22.75 | 2434720  | 22.76 | 798326    | 0.42595 |
| GPGSTDEDLQIGSKPIK         | rdgA    | Eye-specific diacylglycerol kinase (DAG kinase 2) (DGK 2) (Diglyceride kinase | 581.304 | 3 | 23.2  | 1491415  | 23.18 | 425538    | 0.37065 |
| LGNYAPIIIVPPSWIVK         | rdgA    | Eye-specific diacylglycerol kinase (DAG kinase 2) (DGK 2) (Diglyceride kinase | 884.014 | 2 | 52.63 | 3322956  | 52.44 | 1330008   | 0.51994 |
| QVFDLTQGGPK               | rdgA    | Eye-specific diacylglycerol kinase (DAG kinase 2) (DGK 2) (Diglyceride kinase | 595.314 | 2 | 28.22 | 3580063  | 28.2  | 2623698   | 0.95202 |
| SFAAFSQR                  | rdgA    | Eye-specific diacylglycerol kinase (DAG kinase 2) (DGK 2) (Diglyceride kinase | 457.23  | 2 | 23.28 | 6655876  | 23.37 | 6106585   | 1.19183 |
| TIPMQVDGEACR              | rdgA    | Eye-specific diacylglycerol kinase (DAG kinase 2) (DGK 2) (Diglyceride kinase | 688.818 | 2 | 23.21 | 1029594  | 23.29 | 655361    | 0.82687 |
| TIPMQVDGEACR              | rdgA    | Eye-specific diacylglycerol kinase (DAG kinase 2) (DGK 2) (Diglyceride kinase | 696.816 | 2 | 17.7  | 628084   | 17.41 | 337537    | 0.69811 |
| VKPSVIEIELLNK             | rdgA    | Eye-specific diacylglycerol kinase (DAG kinase 2) (DGK 2) (Diglyceride kinase | 741.451 | 2 | 38.07 | 1106361  | 37.96 | 617198    | 0.72469 |
| VKPSVIEIELLNK             | rdgA    | Eye-specific diacylglycerol kinase (DAG kinase 2) (DGK 2) (Diglyceride kinase | 494.636 | 3 | 38.07 | 3645006  | 37.92 | 2591446   | 0.92356 |
| VSQDWCFIDSCAEHYFR         | rdgA    | Eye-specific diacylglycerol kinase (DAG kinase 2) (DGK 2) (Diglyceride kinase | 774.33  | 3 | 41.88 | 500902   | 41.72 | 464633    | 1.20498 |
| VTPNDDVTDDHVDR            | rdgA    | Eye-specific diacylglycerol kinase (DAG kinase 2) (DGK 2) (Diglyceride kinase | 533.241 | 3 | 14.64 | 1483070  | 14.56 | 900190    | 0.78849 |
| YIIASATR                  | rdgA    | Eye-specific diacylglycerol kinase (DAG kinase 2) (DGK 2) (Diglyceride kinase | 447.756 | 2 | 19.6  | 1081315  | 19.55 | 314198    | 0.37746 |
| ILTGVVR                   | RpS11   | 40S ribosomal protein S11                                                     | 379.25  | 2 | 21.96 | 1109408  | 21.94 | 1280841   | 1.49978 |
| IQVNPNHIEIKPTTR           | DnaJ-1  | DnaJ protein homolog 1 (DROJ1)                                                | 621.015 | 3 | 20.92 | 19679    | 20.89 | 261697    | 17.275  |
| SLTIDNLDLYEK              | Stat92E | Signal transducer and transcription activator (d-STAT) (Protein marelle)      | 785.904 | 2 | 48.67 | 137787   | 48.23 | 187413    | 1.76691 |
| FLINQR                    | RpL29   | 60S ribosomal protein L29 (L43)                                               | 395.732 | 2 | 22.84 | 98765624 | 22.79 | 117947512 | 1.55133 |
| HESTLGMDVK                | RpL29   | 60S ribosomal protein L29 (L43)                                               | 558.771 | 2 | 17.44 | 8388695  | 17.45 | 10347835  | 1.60242 |
| HESTLGMDVK                | RpL29   | 60S ribosomal protein L29 (L43)                                               | 566.769 | 2 | 11.21 | 6807770  | 11.36 | 4749146   | 0.90622 |
| AQCPIVER                  | RpS5a   | 40S ribosomal protein S5a                                                     | 486.75  | 2 | 14.71 | 806831   | 14.72 | 445526    | 0.71732 |

|                            |          |                                                                                 |         |   |       |          |       |          |         |
|----------------------------|----------|---------------------------------------------------------------------------------|---------|---|-------|----------|-------|----------|---------|
| QAVDVSPLR                  | RpS5a    | 40S ribosomal protein S5a                                                       | 492.777 | 2 | 23.02 | 630384   | 23.02 | 403036   | 0.83054 |
| TIAECLADELINA              | RpS5a    | 40S ribosomal protein S5a                                                       | 816.419 | 2 | 52.59 | 3303911  | 52.37 | 1805891  | 0.71004 |
| TIAECLADELINA              | RpS5a    | 40S ribosomal protein S5a                                                       | 544.615 | 3 | 52.55 | 1853788  | 52.37 | 881679   | 0.61784 |
| WSCDDVTVNDISLQDYISVK       | RpS5a    | 40S ribosomal protein S5a                                                       | 1179.05 | 2 | 47.03 | 482748   | 46.74 | 433432   | 1.16633 |
| LVPVAGLVDSFQK              | ATPsynD  | ATP synthase subunit d, mitochondrial (ATPase subunit d)                        | 686.895 | 2 | 44.34 | 1462212  | 44.11 | 1311560  | 1.1652  |
| CGGAVFAAEQQLSK             | Mlp84B   | Muscle LIM protein Mlp84B                                                       | 733.359 | 2 | 29.7  | 610036   | 29.56 | 832171   | 1.77206 |
| GFGYGHAPTLVSTSGESTIQFPDGF  | Mlp84B   | Muscle LIM protein Mlp84B                                                       | 786.899 | 4 | 39.36 | 1207154  | 39.16 | 1556105  | 1.67455 |
| GVGYGLGAGALTTF             | Mlp84B   | Muscle LIM protein Mlp84B                                                       | 642.335 | 2 | 47.28 | 1954521  | 47.06 | 2621412  | 1.74228 |
| GYGYGQGGGALQSDCYAHDDGAF    | Mlp84B   | Muscle LIM protein Mlp84B                                                       | 905.061 | 3 | 26.86 | 601871   | 26.77 | 882779   | 1.90533 |
| LAGGYVFFHK                 | Mlp84B   | Muscle LIM protein Mlp84B                                                       | 496.272 | 2 | 20.86 | 564185   | 20.81 | 510898   | 1.17635 |
| SVYAAEER                   | Mlp84B   | Muscle LIM protein Mlp84B                                                       | 462.725 | 2 | 11.82 | 2588129  | 11.89 | 1417299  | 0.71137 |
| HSITSGGSGGGGFR             | Rsf1     | RNA-binding protein Rsf1 (RNA-binding protein Rox21)                            | 638.805 | 2 | 12.65 | 1063621  | 12.67 | 1034087  | 1.26297 |
| HSITSGGSGGGGFR             | Rsf1     | RNA-binding protein Rsf1 (RNA-binding protein Rox21)                            | 426.206 | 3 | 12.65 | 1459305  | 12.67 | 1825302  | 1.62484 |
| VYVGNLTDK                  | Rsf1     | RNA-binding protein Rsf1 (RNA-binding protein Rox21)                            | 504.772 | 2 | 21.41 | 1430452  | 21.39 | 1257685  | 1.14214 |
| YSSGSSASYGR                | Rsf1     | RNA-binding protein Rsf1 (RNA-binding protein Rox21)                            | 561.247 | 2 | 9.59  | 527731   | 9.71  | 255024   | 0.62776 |
| ALTVPELTQQMFDAK            | betaTub5 | Tubulin beta-1 chain (Beta-1-tubulin)                                           | 854.435 | 2 | 37.81 | 1590296  | 37.56 | 1317924  | 1.07655 |
| AVLVLEPGTMDSVR             | betaTub5 | Tubulin beta-1 chain (Beta-1-tubulin)                                           | 801.414 | 2 | 39.24 | 2023515  | 39.04 | 2057238  | 1.32069 |
| AVLVLEPGTMDSVR             | betaTub5 | Tubulin beta-1 chain (Beta-1-tubulin)                                           | 809.411 | 2 | 34.48 | 5552510  | 34.3  | 4552577  | 1.0651  |
| EAESCDLQGFQLTHSLGGGTGSC    | betaTub5 | Tubulin beta-1 chain (Beta-1-tubulin)                                           | 1109.85 | 3 | 41.84 | 370508   | 41.64 | 177516   | 0.62239 |
| GHYTEGAELVDSVLDDVVR        | betaTub5 | Tubulin beta-1 chain (Beta-1-tubulin)                                           | 653.665 | 3 | 50.34 | 2775420  | 50.24 | 1100574  | 0.51513 |
| IMNTYSVVPSPK               | betaTub5 | Tubulin beta-1 chain (Beta-1-tubulin)                                           | 668.352 | 2 | 29.06 | 1095355  | 28.94 | 858780   | 1.01847 |
| INVYYNEASGGK               | betaTub5 | Tubulin beta-1 chain (Beta-1-tubulin)                                           | 657.82  | 2 | 21.12 | 4330833  | 21.13 | 2405958  | 0.72167 |
| LAVNMVFPFR                 | betaTub5 | Tubulin beta-1 chain (Beta-1-tubulin)                                           | 572.321 | 2 | 40.41 | 1793279  | 40.19 | 932227   | 0.6753  |
| LAVNMVFPFR                 | betaTub5 | Tubulin beta-1 chain (Beta-1-tubulin)                                           | 580.318 | 2 | 34.29 | 768535   | 34.41 | 1250344  | 2.11343 |
| LHFFMPGFAPLTSR             | betaTub5 | Tubulin beta-1 chain (Beta-1-tubulin)                                           | 540.95  | 3 | 48.83 | 2785496  | 48.88 | 1571753  | 0.733   |
| LHFFMPGFAPLTSR             | betaTub5 | Tubulin beta-1 chain (Beta-1-tubulin)                                           | 546.282 | 3 | 42.62 | 1500055  | 42.47 | 820442   | 0.7105  |
| LTTPTYGDLNHLVSLTMSGVTCLR   | betaTub5 | Tubulin beta-1 chain (Beta-1-tubulin)                                           | 917.467 | 3 | 55.9  | 882815   | 55.69 | 373168   | 0.54911 |
| NSSYFVEWIPNNVK             | betaTub5 | Tubulin beta-1 chain (Beta-1-tubulin)                                           | 848.92  | 2 | 44.43 | 6003407  | 44.1  | 632379   | 0.13684 |
| SGPFGQIFRPDNFVFGQSGAGNNV   | betaTub5 | Tubulin beta-1 chain (Beta-1-tubulin)                                           | 933.453 | 3 | 49.4  | 1384897  | 49.2  | 571844   | 0.53639 |
| YLTVAAIFR                  | betaTub5 | Tubulin beta-1 chain (Beta-1-tubulin)                                           | 527.308 | 2 | 45.1  | 10561950 | 44.89 | 6760614  | 0.8315  |
| HPSKPEPSGECQPDLR           | Caf1     | Probable histone-binding protein Caf1 (Chromatin assembly factor 1 p55 subunit) | 611.956 | 3 | 13    | 2959819  | 12.95 | 2946280  | 1.2931  |
| IEIEIK                     | Caf1     | Probable histone-binding protein Caf1 (Chromatin assembly factor 1 p55 subunit) | 372.729 | 2 | 26.69 | 18490798 | 26.63 | 10128032 | 0.71153 |
| IGEEQSTEDAEDGPPPELLFIHGGHT | Caf1     | Probable histone-binding protein Caf1 (Chromatin assembly factor 1 p55 subunit) | 959.789 | 3 | 36.67 | 5605498  | 36.49 | 6740038  | 1.56196 |
| IGEEQSTEDAEDGPPPELLFIHGGHT | Caf1     | Probable histone-binding protein Caf1 (Chromatin assembly factor 1 p55 subunit) | 720.094 | 4 | 36.67 | 22180360 | 36.49 | 27435578 | 1.60682 |
| INHEGEVNR                  | Caf1     | Probable histone-binding protein Caf1 (Chromatin assembly factor 1 p55 subunit) | 534.265 | 2 | 7.93  | 6273340  | 8.06  | 3016533  | 0.62464 |
| INHEGEVNR                  | Caf1     | Probable histone-binding protein Caf1 (Chromatin assembly factor 1 p55 subunit) | 356.512 | 3 | 7.93  | 5037983  | 8.06  | 2395439  | 0.61766 |
| LHVWDLK                    | Caf1     | Probable histone-binding protein Caf1 (Chromatin assembly factor 1 p55 subunit) | 499.277 | 2 | 29.44 | 14247125 | 29.32 | 17649806 | 1.60929 |
| LMIWDR                     | Caf1     | Probable histone-binding protein Caf1 (Chromatin assembly factor 1 p55 subunit) | 467.744 | 2 | 35.19 | 7330851  | 35.02 | 7635260  | 1.35298 |
| NIFTGHTAVVEDVAWHLLHESLFGS  | Caf1     | Probable histone-binding protein Caf1 (Chromatin assembly factor 1 p55 subunit) | 1145.9  | 3 | 62.65 | 358249   | 62.54 | 531197   | 1.92616 |
| NIFTGHTAVVEDVAWHLLHESLFGS  | Caf1     | Probable histone-binding protein Caf1 (Chromatin assembly factor 1 p55 subunit) | 859.68  | 4 | 62.68 | 6111397  | 62.65 | 6672885  | 1.41839 |
| SDNAAESFDDAVEER            | Caf1     | Probable histone-binding protein Caf1 (Chromatin assembly factor 1 p55 subunit) | 827.845 | 2 | 26.73 | 15509184 | 26.66 | 5784847  | 0.48454 |
| TVALLWDLR                  | Caf1     | Probable histone-binding protein Caf1 (Chromatin assembly factor 1 p55 subunit) | 487.277 | 2 | 39.87 | 45980548 | 39.69 | 47007576 | 1.32805 |
| VINEEYK                    | Caf1     | Probable histone-binding protein Caf1 (Chromatin assembly factor 1 p55 subunit) | 447.732 | 2 | 12.61 | 10431289 | 12.66 | 5073242  | 0.63179 |
| YMPQNACVIATK               | Caf1     | Probable histone-binding protein Caf1 (Chromatin assembly factor 1 p55 subunit) | 698.342 | 2 | 23.89 | 7995023  | 23.84 | 9614787  | 1.56222 |
| YMPQNACVIATK               | Caf1     | Probable histone-binding protein Caf1 (Chromatin assembly factor 1 p55 subunit) | 706.339 | 2 | 20.03 | 1455765  | 20.05 | 1599258  | 1.42708 |
| AAYFGFYDTAR                | sesB     | ADP,ATP carrier protein (ADP/ATP translocase) (Adenine nucleotide translocase)  | 641.299 | 2 | 36.23 | 8457992  | 36.06 | 4781556  | 0.73439 |
| DFAAGGISA                  | sesB     | ADP,ATP carrier protein (ADP/ATP translocase) (Adenine nucleotide translocase)  | 597.312 | 2 | 28.61 | 8645959  | 28.51 | 9889000  | 1.4858  |
| GFGVSVQGIHIIYR             | sesB     | ADP,ATP carrier protein (ADP/ATP translocase) (Adenine nucleotide translocase)  | 704.901 | 2 | 45.35 | 4833482  | 45.12 | 2059585  | 0.55353 |
| SDGIVGLYR                  | sesB     | ADP,ATP carrier protein (ADP/ATP translocase) (Adenine nucleotide translocase)  | 490.264 | 2 | 28.91 | 1147390  | 28.83 | 342684   | 0.38798 |
| TAVAPIER                   | sesB     | ADP,ATP carrier protein (ADP/ATP translocase) (Adenine nucleotide translocase)  | 428.748 | 2 | 16.27 | 5420824  | 16.21 | 2687378  | 0.644   |
| TALHYLEITAI                | Cpr      | NADPH--cytochrome P450 reductase (CPR) (P450R) (EC 1.6.2.4)                     | 533.635 | 3 | 40.81 | 57301    | 40.62 | 150767   | 3.41796 |
| EVDGSGTIAS                 | CG8635   | Zinc finger CCCH domain-containing protein 15 homolog (DRG family regulator)    | 653.815 | 2 | 13.51 | 1132231  | 13.47 | 535526   | 0.61442 |
| FFLEAVEK                   | CG8635   | Zinc finger CCCH domain-containing protein 15 homolog (DRG family regulator)    | 491.766 | 2 | 36.01 | 903927   | 35.86 | 657062   | 0.94427 |

|                           |         |                                                                             |         |   |       |          |       |          |         |
|---------------------------|---------|-----------------------------------------------------------------------------|---------|---|-------|----------|-------|----------|---------|
| FIQQVQK                   | CG8635  | Zinc finger CCCH domain-containing protein 15 homolog (DRG family regulat   | 445.758 | 2 | 14.57 | 1436865  | 14.52 | 689451   | 0.62332 |
| LLDQATEAAK                | CG8635  | Zinc finger CCCH domain-containing protein 15 homolog (DRG family regulat   | 530.288 | 2 | 17.48 | 1942370  | 17.48 | 2050056  | 1.37106 |
| VTLESFLAWK                | CG8635  | Zinc finger CCCH domain-containing protein 15 homolog (DRG family regulat   | 597.332 | 2 | 50.62 | 626652   | 50.28 | 644776   | 1.33661 |
| CGVISPR                   | RpS15Ab | 40S ribosomal protein S15Ab                                                 | 394.708 | 2 | 13.98 | 622408   | 13.82 | 550921   | 1.14984 |
| MNVLADALK                 | RpS15Ab | 40S ribosomal protein S15Ab                                                 | 487.771 | 2 | 34.9  | 1815269  | 34.78 | 1716352  | 1.22825 |
| QFGYVLLTSSGGIMDHEEAR      | RpS15Ab | 40S ribosomal protein S15Ab                                                 | 737.356 | 3 | 39.87 | 1542845  | 39.68 | 2090883  | 1.76047 |
| WTNNLLPSR                 | RpS15Ab | 40S ribosomal protein S15Ab                                                 | 550.796 | 2 | 30.38 | 2286379  | 30.28 | 1280460  | 0.72751 |
| LAMQVVLHTELER             | TrpA1   | Transient receptor potential cation channel subfamily A member 1 (dTRPA1) ( | 518.948 | 3 | 27.31 | 103016   | 27.24 | 1044228  | 13.1678 |
| MLEQQHHLVR                | TrpA1   | Transient receptor potential cation channel subfamily A member 1 (dTRPA1) ( | 430.896 | 3 | 13.31 | 104134   | 13.27 | 657559   | 8.20284 |
| NVIDIQQGGHEGR             | TrpA1   | Transient receptor potential cation channel subfamily A member 1 (dTRPA1) ( | 474.908 | 3 | 18.12 | 345514   | 18.16 | 3305973  | 12.4296 |
| SPLLLAASR                 | TrpA1   | Transient receptor potential cation channel subfamily A member 1 (dTRPA1) ( | 464.285 | 2 | 29.1  | 430144   | 29.02 | 1188200  | 3.58838 |
| DAGHIAGLNVLR              | Hsp70Ba | Major heat shock 70 kDa protein Ba (Heat shock protein 70Ba) (HSP70-87C1    | 618.346 | 2 | 31.67 | 40614    | 31.54 | 13040718 | 417.108 |
| DAGHIAGLNVLR              | Hsp70Ba | Major heat shock 70 kDa protein Ba (Heat shock protein 70Ba) (HSP70-87C1    | 412.567 | 3 | 31.59 | 26572    | 31.54 | 33980956 | 1661.24 |
| DNNALGTFDLGIPPAPR         | Hsp70Ba | Major heat shock 70 kDa protein Ba (Heat shock protein 70Ba) (HSP70-87C1    | 927.971 | 2 | 45.07 | 166587   | 43.39 | 30976200 | 241.551 |
| DNNALGTFDLGIPPAPR         | Hsp70Ba | Major heat shock 70 kDa protein Ba (Heat shock protein 70Ba) (HSP70-87C1    | 618.983 | 3 | 45.21 | 24051    | 43.65 | 6711729  | 362.513 |
| ETAAYLGESITDAVIVPAYFNDSC  | Hsp70Ba | Major heat shock 70 kDa protein Ba (Heat shock protein 70Ba) (HSP70-87C1    | 987.477 | 3 | 58.6  | 304104   | 58.36 | 1308713  | 5.59042 |
| FAPEEISSMVLTK             | Hsp70Ba | Major heat shock 70 kDa protein Ba (Heat shock protein 70Ba) (HSP70-87C1    | 726.376 | 2 | 41.77 | 22231    | 41.79 | 11132469 | 650.511 |
| FAPEEISSMVLTK             | Hsp70Ba | Major heat shock 70 kDa protein Ba (Heat shock protein 70Ba) (HSP70-87C1    | 484.587 | 3 | 41.77 | 0        | 41.79 | 276280   | #DIV/0! |
| FAPEEISSMVLTK             | Hsp70Ba | Major heat shock 70 kDa protein Ba (Heat shock protein 70Ba) (HSP70-87C1    | 734.374 | 2 | 35.12 | 297494   | 34.86 | 2047640  | 8.94124 |
| FEELCADLFR                | Hsp70Ba | Major heat shock 70 kDa protein Ba (Heat shock protein 70Ba) (HSP70-87C1    | 650.306 | 2 | 41.55 | 32123    | 41.36 | 4667637  | 188.757 |
| GQIHDIIVLVGGSTR           | Hsp70Ba | Major heat shock 70 kDa protein Ba (Heat shock protein 70Ba) (HSP70-87C1    | 726.402 | 2 | 27.66 | 141880   | 27.58 | 2013950  | 18.4395 |
| GQIHDIIVLVGGSTR           | Hsp70Ba | Major heat shock 70 kDa protein Ba (Heat shock protein 70Ba) (HSP70-87C1    | 484.604 | 3 | 27.43 | 42940    | 27.54 | 4848927  | 146.692 |
| HCSPIMTK                  | Hsp70Ba | Major heat shock 70 kDa protein Ba (Heat shock protein 70Ba) (HSP70-87C1    | 487.233 | 2 | 11.2  | 35165    | 11.25 | 2786296  | 102.929 |
| HCSPIMTK                  | Hsp70Ba | Major heat shock 70 kDa protein Ba (Heat shock protein 70Ba) (HSP70-87C1    | 495.231 | 2 | 9.26  | 11777    | 9.24  | 218205   | 24.0687 |
| IQDVLLVDVAPLSLGIETAGGVMTK | Hsp70Ba | Major heat shock 70 kDa protein Ba (Heat shock protein 70Ba) (HSP70-87C1    | 1270.21 | 2 | 61.32 | 0        | 61.17 | 571901   | #DIV/0! |
| IQDVLLVDVAPLSLGIETAGGVMTK | Hsp70Ba | Major heat shock 70 kDa protein Ba (Heat shock protein 70Ba) (HSP70-87C1    | 847.14  | 3 | 61.32 | 519      | 61.21 | 3335041  | 8347.49 |
| IQDVLLVDVAPLSLGIETAGGVMTK | Hsp70Ba | Major heat shock 70 kDa protein Ba (Heat shock protein 70Ba) (HSP70-87C1    | 852.472 | 3 | 57.66 | 0        | 57.38 | 359486   | #DIV/0! |
| LSQAEIDR                  | Hsp70Ba | Major heat shock 70 kDa protein Ba (Heat shock protein 70Ba) (HSP70-87C1    | 466.246 | 2 | 14.26 | 24538    | 14.28 | 4887219  | 258.729 |
| LVTHLAEFEK                | Hsp70Ba | Major heat shock 70 kDa protein Ba (Heat shock protein 70Ba) (HSP70-87C1    | 593.827 | 2 | 25.94 | 371859   | 26.5  | 486802   | 1.70058 |
| NALESYVFNVK               | Hsp70Ba | Major heat shock 70 kDa protein Ba (Heat shock protein 70Ba) (HSP70-87C1    | 642.335 | 2 | 40.6  | 35451    | 38.81 | 48323708 | 1770.74 |
| NLNLINPDEAVAYGAAVQAAILSGI | Hsp70Ba | Major heat shock 70 kDa protein Ba (Heat shock protein 70Ba) (HSP70-87C1    | 1493.76 | 2 | 58.87 | 44314    | 57.77 | 661805   | 19.4004 |
| NLNLINPDEAVAYGAAVQAAILSGI | Hsp70Ba | Major heat shock 70 kDa protein Ba (Heat shock protein 70Ba) (HSP70-87C1    | 996.175 | 3 | 58.34 | 121646   | 57.81 | 3315510  | 35.4058 |
| NQVAMNPR                  | Hsp70Ba | Major heat shock 70 kDa protein Ba (Heat shock protein 70Ba) (HSP70-87C1    | 465.235 | 2 | 11.74 | 204889   | 11.84 | 365105   | 2.31484 |
| STAGDTHLGGEDFDNR          | Hsp70Ba | Major heat shock 70 kDa protein Ba (Heat shock protein 70Ba) (HSP70-87C1    | 846.366 | 2 | 18.67 | 1657789  | 18.65 | 1831600  | 1.43524 |
| STAGDTHLGGEDFDNR          | Hsp70Ba | Major heat shock 70 kDa protein Ba (Heat shock protein 70Ba) (HSP70-87C1    | 564.58  | 3 | 18.67 | 10781481 | 18.68 | 14815577 | 1.7851  |
| TFSTYSDNQPGVSIQVYEGER     | Hsp70Ba | Major heat shock 70 kDa protein Ba (Heat shock protein 70Ba) (HSP70-87C1    | 793.036 | 3 | 34.64 | 0        | 34.11 | 7628120  | #DIV/0! |
| TLSSSTEATIEIDALFEGQDFYTK  | Hsp70Ba | Major heat shock 70 kDa protein Ba (Heat shock protein 70Ba) (HSP70-87C1    | 1333.64 | 2 | 55.81 | 30514    | 54.36 | 4199024  | 178.76  |
| TLSSSTEATIEIDALFEGQDFYTK  | Hsp70Ba | Major heat shock 70 kDa protein Ba (Heat shock protein 70Ba) (HSP70-87C1    | 889.429 | 3 | 55.66 | 365012   | 54.36 | 14991373 | 53.3527 |
| TTPSYVAFTDSER             | Hsp70Ba | Major heat shock 70 kDa protein Ba (Heat shock protein 70Ba) (HSP70-87C1    | 737.346 | 2 | 28.48 | 159128   | 28.32 | 60403172 | 493.101 |
| TTPSYVAFTDSER             | Hsp70Ba | Major heat shock 70 kDa protein Ba (Heat shock protein 70Ba) (HSP70-87C1    | 491.9   | 3 | 28.44 | 0        | 28.4  | 323797   | #DIV/0! |
| VEIANDQGNR                | Hsp70Ba | Major heat shock 70 kDa protein Ba (Heat shock protein 70Ba) (HSP70-87C1    | 614.818 | 2 | 18.24 | 20421124 | 18.27 | 30231408 | 1.9231  |
| VQSLLQEFFHGK              | Hsp70Ba | Major heat shock 70 kDa protein Ba (Heat shock protein 70Ba) (HSP70-87C1    | 478.258 | 3 | 46.44 | 17592    | 46.3  | 17550354 | 1295.96 |
| IADVYVNASNNELVR           | RpS8    | 40S ribosomal protein S8                                                    | 838.934 | 2 | 31.29 | 2587695  | 31.12 | 2542053  | 1.27613 |
| IADVYVNASNNELVR           | RpS8    | 40S ribosomal protein S8                                                    | 559.625 | 3 | 31.29 | 1034232  | 31.16 | 1022478  | 1.28428 |
| ILACISSRPGQCGR            | RpS8    | 40S ribosomal protein S8                                                    | 787.898 | 2 | 20.14 | 140708   | 20.13 | 87291    | 0.80588 |
| ILACISSRPGQCGR            | RpS8    | 40S ribosomal protein S8                                                    | 525.601 | 3 | 20.1  | 386803   | 20.05 | 432135   | 1.45128 |
| LETGNFAWASEGVAR           | RpS8    | 40S ribosomal protein S8                                                    | 804.394 | 2 | 35.85 | 1612600  | 35.66 | 1025388  | 0.82601 |
| NSIVVIDATPFR              | RpS8    | 40S ribosomal protein S8                                                    | 666.37  | 2 | 40.3  | 3907103  | 40.11 | 3186895  | 1.05958 |
| QWYEAHYVLLPLGR            | RpS8    | 40S ribosomal protein S8                                                    | 544.616 | 3 | 39.06 | 708914   | 38.88 | 864527   | 1.58419 |
| SDGYILEGK                 | RpS8    | 40S ribosomal protein S8                                                    | 491.248 | 2 | 21.95 | 526219   | 21.94 | 571255   | 1.41022 |
| VEQALDQFTSGR              | RpS8    | 40S ribosomal protein S8                                                    | 740.357 | 2 | 25.93 | 843576   | 25.86 | 462117   | 0.71162 |
| DGSLNYIEENDEVLVAGFGR      | RpS23   | 40S ribosomal protein S23                                                   | 1099.02 | 2 | 48.42 | 759053   | 48.15 | 930050   | 1.59168 |
| DGSLNYIEENDEVLVAGFGR      | RpS23   | 40S ribosomal protein S23                                                   | 733.018 | 3 | 48.42 | 744083   | 48.11 | 1097192  | 1.91551 |

|                            |           |                                                                                       |         |   |       |           |       |           |         |
|----------------------------|-----------|---------------------------------------------------------------------------------------|---------|---|-------|-----------|-------|-----------|---------|
| ITAFVPR                    | RpS23     | 40S ribosomal protein S23                                                             | 402.242 | 2 | 24.96 | 1909159   | 24.94 | 2341284   | 1.59307 |
| VANVSLALALYK               | RpS23     | 40S ribosomal protein S23                                                             | 595.861 | 2 | 41.4  | 2813053   | 41.22 | 3213274   | 1.48386 |
| ATADEMTK                   | HDAC1     | Histone deacetylase HDAC1 (HD) (EC 3.5.1.98)                                          | 433.7   | 2 | 9.11  | 2264200   | 9.21  | 405315    | 0.23254 |
| CWTYETSVALAVEIANELPYNDYFE  | HDAC1     | Histone deacetylase HDAC1 (HD) (EC 3.5.1.98)                                          | 963.692 | 4 | 65.61 | 472255    | 65.23 | 0         | 0       |
| DGMDDDAYESIFVPIISK         | HDAC1     | Histone deacetylase HDAC1 (HD) (EC 3.5.1.98)                                          | 1007.97 | 2 | 52.9  | 530494    | 52.56 | 138330    | 0.33873 |
| FHSDEYVR                   | HDAC1     | Histone deacetylase HDAC1 (HD) (EC 3.5.1.98)                                          | 526.743 | 2 | 13.32 | 709963    | 14.63 | 1351440   | 2.47277 |
| FHSDEYVR                   | HDAC1     | Histone deacetylase HDAC1 (HD) (EC 3.5.1.98)                                          | 351.498 | 3 | 13.32 | 673959    | 14.63 | 1582958   | 3.05111 |
| FNVGEDCPVFDGLYEFCQLSAGGS   | HDAC1     | Histone deacetylase HDAC1 (HD) (EC 3.5.1.98)                                          | 1069.83 | 3 | 57.94 | 87424272  | 57.7  | 63756520  | 0.94736 |
| FNVGEDCPVFDGLYEFCQLSAGGS   | HDAC1     | Histone deacetylase HDAC1 (HD) (EC 3.5.1.98)                                          | 802.624 | 4 | 57.94 | 1118260   | 57.66 | 844540    | 0.98107 |
| LGCFNLTVK                  | HDAC1     | Histone deacetylase HDAC1 (HD) (EC 3.5.1.98)                                          | 526.284 | 2 | 33.5  | 150463440 | 33.4  | 43651228  | 0.37687 |
| LHISPSNMTNQNTSEYLEK        | HDAC1     | Histone deacetylase HDAC1 (HD) (EC 3.5.1.98)                                          | 736.02  | 3 | 28.84 | 82431888  | 28.73 | 40791888  | 0.64284 |
| LHISPSNMTNQNTSEYLEK        | HDAC1     | Histone deacetylase HDAC1 (HD) (EC 3.5.1.98)                                          | 741.351 | 3 | 23.7  | 70432096  | 23.7  | 39591500  | 0.73022 |
| MTHNLLLNLYGLYR             | HDAC1     | Histone deacetylase HDAC1 (HD) (EC 3.5.1.98)                                          | 804.422 | 2 | 38.14 | 141822192 | 37.98 | 128141848 | 1.17373 |
| MTHNLLLNLYGLYR             | HDAC1     | Histone deacetylase HDAC1 (HD) (EC 3.5.1.98)                                          | 536.617 | 3 | 38.14 | 462744864 | 37.98 | 469054016 | 1.31675 |
| MTHNLLLNLYGLYR             | HDAC1     | Histone deacetylase HDAC1 (HD) (EC 3.5.1.98)                                          | 812.419 | 2 | 36.77 | 22296632  | 36.64 | 15969687  | 0.93042 |
| MTHNLLLNLYGLYR             | HDAC1     | Histone deacetylase HDAC1 (HD) (EC 3.5.1.98)                                          | 541.949 | 3 | 36.77 | 72824472  | 36.64 | 62372424  | 1.1126  |
| QASEICINWGGGLHHAK          | HDAC1     | Histone deacetylase HDAC1 (HD) (EC 3.5.1.98)                                          | 939.457 | 2 | 29.1  | 2051706   | 29.03 | 1373282   | 0.86949 |
| QASEICINWGGGLHHAK          | HDAC1     | Histone deacetylase HDAC1 (HD) (EC 3.5.1.98)                                          | 626.641 | 3 | 29.1  | 19598820  | 29.03 | 17632522  | 1.16871 |
| QASEICINWGGGLHHAK          | HDAC1     | Histone deacetylase HDAC1 (HD) (EC 3.5.1.98)                                          | 470.232 | 4 | 29.14 | 19831466  | 29.03 | 18076356  | 1.18407 |
| SEASGFCYVNDIVLGILELLK      | HDAC1     | Histone deacetylase HDAC1 (HD) (EC 3.5.1.98)                                          | 1170.61 | 2 | 65.78 | 2719398   | 65.77 | 2080468   | 0.99383 |
| SEASGFCYVNDIVLGILELLK      | HDAC1     | Histone deacetylase HDAC1 (HD) (EC 3.5.1.98)                                          | 780.743 | 3 | 65.78 | 3096969   | 65.77 | 1401537   | 0.58788 |
| SIRPDNMSEYNK               | HDAC1     | Histone deacetylase HDAC1 (HD) (EC 3.5.1.98)                                          | 727.341 | 2 | 16.04 | 53708104  | 16.04 | 37971828  | 0.91843 |
| SIRPDNMSEYNK               | HDAC1     | Histone deacetylase HDAC1 (HD) (EC 3.5.1.98)                                          | 485.23  | 3 | 16.04 | 120756288 | 16.04 | 105525512 | 1.13519 |
| SIRPDNMSEYNK               | HDAC1     | Histone deacetylase HDAC1 (HD) (EC 3.5.1.98)                                          | 735.338 | 2 | 10.87 | 23904354  | 10.96 | 16955166  | 0.9214  |
| SIRPDNMSEYNK               | HDAC1     | Histone deacetylase HDAC1 (HD) (EC 3.5.1.98)                                          | 490.561 | 3 | 10.87 | 53564524  | 10.96 | 44713268  | 1.08438 |
| VCYYYDSDIGNYYYGQGHMPKPHF   | HDAC1     | Histone deacetylase HDAC1 (HD) (EC 3.5.1.98)                                          | 746.579 | 4 | 29.87 | 4115821   | 29.76 | 3567074   | 1.12584 |
| VCYYYDSDIGNYYYGQGHMPKPHF   | HDAC1     | Histone deacetylase HDAC1 (HD) (EC 3.5.1.98)                                          | 750.577 | 4 | 28.76 | 2696114   | 28.69 | 1881290   | 0.90644 |
| VLYIDIDVHHGDGVEEAFYTTDR    | HDAC1     | Histone deacetylase HDAC1 (HD) (EC 3.5.1.98)                                          | 888.757 | 3 | 41.25 | 165468896 | 41.14 | 61172216  | 0.48024 |
| VLYIDIDVHHGDGVEEAFYTTDR    | HDAC1     | Histone deacetylase HDAC1 (HD) (EC 3.5.1.98)                                          | 666.82  | 4 | 41.25 | 256402688 | 41.14 | 111283752 | 0.56381 |
| VMETFQPAAVVLQCGADSLTGDR    | HDAC1     | Histone deacetylase HDAC1 (HD) (EC 3.5.1.98)                                          | 1233.09 | 2 | 49.57 | 27524708  | 49.28 | 8039522   | 0.37943 |
| VMETFQPAAVVLQCGADSLTGDR    | HDAC1     | Histone deacetylase HDAC1 (HD) (EC 3.5.1.98)                                          | 822.398 | 3 | 49.57 | 84715408  | 49.28 | 27025732  | 0.41442 |
| VMETFQPAAVVLQCGADSLTGDR    | HDAC1     | Histone deacetylase HDAC1 (HD) (EC 3.5.1.98)                                          | 827.73  | 3 | 46.69 | 8445326   | 46.45 | 2799609   | 0.43063 |
| VMTVSFHK                   | HDAC1     | Histone deacetylase HDAC1 (HD) (EC 3.5.1.98)                                          | 474.752 | 2 | 20.73 | 109722288 | 20.76 | 57390676  | 0.67947 |
| VMTVSFHK                   | HDAC1     | Histone deacetylase HDAC1 (HD) (EC 3.5.1.98)                                          | 482.75  | 2 | 15.64 | 6358404   | 15.58 | 2631531   | 0.53763 |
| YGEYFPGTGDLR               | HDAC1     | Histone deacetylase HDAC1 (HD) (EC 3.5.1.98)                                          | 687.82  | 2 | 32.53 | 747701952 | 32.44 | 405453280 | 0.70442 |
| YNLPFLMVGGGGYTIR           | HDAC1     | Histone deacetylase HDAC1 (HD) (EC 3.5.1.98)                                          | 879.456 | 2 | 52.58 | 179359136 | 52.33 | 115078000 | 0.83347 |
| YNLPFLMVGGGGYTIR           | HDAC1     | Histone deacetylase HDAC1 (HD) (EC 3.5.1.98)                                          | 586.64  | 3 | 52.58 | 24277252  | 52.29 | 13448192  | 0.71959 |
| YNLPFLMVGGGGYTIR           | HDAC1     | Histone deacetylase HDAC1 (HD) (EC 3.5.1.98)                                          | 887.453 | 2 | 49.33 | 155657392 | 49.1  | 55238892  | 0.461   |
| YNLPFLMVGGGGYTIR           | HDAC1     | Histone deacetylase HDAC1 (HD) (EC 3.5.1.98)                                          | 591.971 | 3 | 49.29 | 5544385   | 48.91 | 3114041   | 0.72961 |
| YYAVNIPLR                  | HDAC1     | Histone deacetylase HDAC1 (HD) (EC 3.5.1.98)                                          | 554.811 | 2 | 35.58 | 11123592  | 35.45 | 2510918   | 0.29323 |
| AAFGLVAEGFR                | SdhA      | Succinate dehydrogenase [ubiquinone] flavoprotein subunit, mitochondrial (EC 1.3.1.2) | 569.306 | 2 | 39.62 | 1069174   | 39.35 | 1016382   | 1.2349  |
| LGANSLDLVVFGR              | SdhA      | Succinate dehydrogenase [ubiquinone] flavoprotein subunit, mitochondrial (EC 1.3.1.2) | 737.425 | 2 | 59.1  | 1075521   | 58.95 | 1014957   | 1.22589 |
| LTTNNFALGYTTK              | porin     | Voltage-dependent anion-selective channel (DmVDAC) (Porin)                            | 722.378 | 2 | 31.55 | 326396    | 31.43 | 582312    | 2.31757 |
| VFGSLETK                   | porin     | Voltage-dependent anion-selective channel (DmVDAC) (Porin)                            | 440.742 | 2 | 21.81 | 305180    | 21.82 | 380085    | 1.61788 |
| VNNASQVGLGYQQK             | porin     | Voltage-dependent anion-selective channel (DmVDAC) (Porin)                            | 753.389 | 2 | 19.18 | 385340    | 19.14 | 400935    | 1.35161 |
| YQLDDASVR                  | porin     | Voltage-dependent anion-selective channel (DmVDAC) (Porin)                            | 591.275 | 2 | 20.06 | 853548    | 20.05 | 1199040   | 1.82485 |
| LFQVEYAIEAIK               | Prosalpha | Proteasome subunit alpha type-5 (EC 3.4.25.1)                                         | 712.395 | 2 | 47.17 | 132055    | 46.95 | 351128    | 3.45408 |
| DAGHIAGLNVLR               | Hsp70Bc   | Major heat shock 70 kDa protein Bc (Heat shock protein 70Bc) (HSP70-87C1)             | 618.346 | 2 | 31.67 | 40614     | 31.54 | 13040718  | 417.108 |
| DAGHIAGLNVLR               | Hsp70Bc   | Major heat shock 70 kDa protein Bc (Heat shock protein 70Bc) (HSP70-87C1)             | 412.567 | 3 | 31.59 | 26572     | 31.54 | 33980956  | 1661.24 |
| DNNALGTFDLSGIPPAPR         | Hsp70Bc   | Major heat shock 70 kDa protein Bc (Heat shock protein 70Bc) (HSP70-87C1)             | 927.971 | 2 | 45.07 | 166587    | 43.39 | 30976200  | 241.551 |
| DNNALGTFDLSGIPPAPR         | Hsp70Bc   | Major heat shock 70 kDa protein Bc (Heat shock protein 70Bc) (HSP70-87C1)             | 618.983 | 3 | 45.21 | 24051     | 43.65 | 6711729   | 362.513 |
| ETAEAYLGESITDAVITVPAYFNDSC | Hsp70Bc   | Major heat shock 70 kDa protein Bc (Heat shock protein 70Bc) (HSP70-87C1)             | 987.477 | 3 | 58.6  | 304104    | 58.36 | 1308713   | 5.59042 |
| FAPEIISSMVLTK              | Hsp70Bc   | Major heat shock 70 kDa protein Bc (Heat shock protein 70Bc) (HSP70-87C1)             | 726.376 | 2 | 41.77 | 22231     | 41.79 | 11132469  | 650.511 |

|                            |         |                                                                          |         |   |       |          |       |          |         |
|----------------------------|---------|--------------------------------------------------------------------------|---------|---|-------|----------|-------|----------|---------|
| FAPEEISSMVLTK              | Hsp70Bc | Major heat shock 70 kDa protein Bc (Heat shock protein 70Bc) (HSP70-87C1 | 484.587 | 3 | 41.77 | 0        | 41.79 | 276280   | #DIV/0! |
| FAPEEISSMVLTK              | Hsp70Bc | Major heat shock 70 kDa protein Bc (Heat shock protein 70Bc) (HSP70-87C1 | 734.374 | 2 | 35.12 | 297494   | 34.86 | 2047640  | 8.94124 |
| FEELCADLFR                 | Hsp70Bc | Major heat shock 70 kDa protein Bc (Heat shock protein 70Bc) (HSP70-87C1 | 650.306 | 2 | 41.55 | 32123    | 41.36 | 4667637  | 188.757 |
| GQIHDIIVLVGGSTR            | Hsp70Bc | Major heat shock 70 kDa protein Bc (Heat shock protein 70Bc) (HSP70-87C1 | 726.402 | 2 | 27.66 | 141880   | 27.58 | 2013950  | 18.4395 |
| GQIHDIIVLVGGSTR            | Hsp70Bc | Major heat shock 70 kDa protein Bc (Heat shock protein 70Bc) (HSP70-87C1 | 484.604 | 3 | 27.43 | 42940    | 27.54 | 4848927  | 146.692 |
| HCSPIMTK                   | Hsp70Bc | Major heat shock 70 kDa protein Bc (Heat shock protein 70Bc) (HSP70-87C1 | 487.233 | 2 | 11.2  | 35165    | 11.25 | 2786296  | 102.929 |
| HCSPIMTK                   | Hsp70Bc | Major heat shock 70 kDa protein Bc (Heat shock protein 70Bc) (HSP70-87C1 | 495.231 | 2 | 9.26  | 11777    | 9.24  | 218205   | 24.0687 |
| IQDVLLVDVAPLSLGIETAGGVMTK  | Hsp70Bc | Major heat shock 70 kDa protein Bc (Heat shock protein 70Bc) (HSP70-87C1 | 1270.21 | 2 | 61.32 | 0        | 61.17 | 571901   | #DIV/0! |
| IQDVLLVDVAPLSLGIETAGGVMTK  | Hsp70Bc | Major heat shock 70 kDa protein Bc (Heat shock protein 70Bc) (HSP70-87C1 | 847.14  | 3 | 61.32 | 519      | 61.21 | 3335041  | 8347.49 |
| IQDVLLVDVAPLSLGIETAGGVMTK  | Hsp70Bc | Major heat shock 70 kDa protein Bc (Heat shock protein 70Bc) (HSP70-87C1 | 852.472 | 3 | 57.66 | 0        | 57.38 | 359486   | #DIV/0! |
| LSQAEIDR                   | Hsp70Bc | Major heat shock 70 kDa protein Bc (Heat shock protein 70Bc) (HSP70-87C1 | 466.246 | 2 | 14.26 | 24538    | 14.28 | 4887219  | 258.729 |
| LVTHLAAEFK                 | Hsp70Bc | Major heat shock 70 kDa protein Bc (Heat shock protein 70Bc) (HSP70-87C1 | 593.827 | 2 | 25.94 | 371859   | 26.5  | 486802   | 1.70058 |
| NALESYVFNVK                | Hsp70Bc | Major heat shock 70 kDa protein Bc (Heat shock protein 70Bc) (HSP70-87C1 | 642.335 | 2 | 40.6  | 35451    | 38.81 | 48323708 | 1770.74 |
| NLNLSINPDEAVAYGAAVQAAILSGI | Hsp70Bc | Major heat shock 70 kDa protein Bc (Heat shock protein 70Bc) (HSP70-87C1 | 1493.76 | 2 | 58.87 | 44314    | 57.77 | 661805   | 19.4004 |
| NLNLSINPDEAVAYGAAVQAAILSGI | Hsp70Bc | Major heat shock 70 kDa protein Bc (Heat shock protein 70Bc) (HSP70-87C1 | 996.175 | 3 | 58.34 | 121646   | 57.81 | 3315510  | 35.4058 |
| NQVAMNPR                   | Hsp70Bc | Major heat shock 70 kDa protein Bc (Heat shock protein 70Bc) (HSP70-87C1 | 465.235 | 2 | 11.74 | 204889   | 11.84 | 365105   | 2.31484 |
| STAGDTHLGGEDFDNR           | Hsp70Bc | Major heat shock 70 kDa protein Bc (Heat shock protein 70Bc) (HSP70-87C1 | 846.366 | 2 | 18.67 | 1657789  | 18.65 | 1831600  | 1.43524 |
| STAGDTHLGGEDFDNR           | Hsp70Bc | Major heat shock 70 kDa protein Bc (Heat shock protein 70Bc) (HSP70-87C1 | 564.58  | 3 | 18.67 | 10781481 | 18.68 | 14815577 | 1.7851  |
| TFSTYSDNQPGVSIQVYEGER      | Hsp70Bc | Major heat shock 70 kDa protein Bc (Heat shock protein 70Bc) (HSP70-87C1 | 793.036 | 3 | 34.64 | 0        | 34.11 | 7628120  | #DIV/0! |
| TLSSSTEATIEIDALFEGQDFYTK   | Hsp70Bc | Major heat shock 70 kDa protein Bc (Heat shock protein 70Bc) (HSP70-87C1 | 1333.64 | 2 | 55.81 | 30514    | 54.36 | 4199024  | 178.76  |
| TLSSSTEATIEIDALFEGQDFYTK   | Hsp70Bc | Major heat shock 70 kDa protein Bc (Heat shock protein 70Bc) (HSP70-87C1 | 889.429 | 3 | 55.66 | 365012   | 54.36 | 14991373 | 53.3527 |
| TTPSYVAFTDSER              | Hsp70Bc | Major heat shock 70 kDa protein Bc (Heat shock protein 70Bc) (HSP70-87C1 | 737.346 | 2 | 28.48 | 159128   | 28.32 | 60403172 | 493.101 |
| TTPSYVAFTDSER              | Hsp70Bc | Major heat shock 70 kDa protein Bc (Heat shock protein 70Bc) (HSP70-87C1 | 491.9   | 3 | 28.44 | 0        | 28.4  | 323797   | #DIV/0! |
| VEIANDQGNR                 | Hsp70Bc | Major heat shock 70 kDa protein Bc (Heat shock protein 70Bc) (HSP70-87C1 | 614.818 | 2 | 18.24 | 20421124 | 18.27 | 30231408 | 1.9231  |
| VQSLLQEFFHGK               | Hsp70Bc | Major heat shock 70 kDa protein Bc (Heat shock protein 70Bc) (HSP70-87C1 | 478.258 | 3 | 46.44 | 17592    | 46.3  | 17550354 | 1295.96 |
| DAGHIAGLNVLR               | Hsp70Bb | Major heat shock 70 kDa protein Bb (Heat shock protein 70Bb) (HSP70-87C1 | 618.346 | 2 | 31.67 | 40614    | 31.54 | 13040718 | 417.108 |
| DAGHIAGLNVLR               | Hsp70Bb | Major heat shock 70 kDa protein Bb (Heat shock protein 70Bb) (HSP70-87C1 | 412.567 | 3 | 31.59 | 26572    | 31.54 | 33980956 | 1661.24 |
| DNNALGTFDLSGIPPAPR         | Hsp70Bb | Major heat shock 70 kDa protein Bb (Heat shock protein 70Bb) (HSP70-87C1 | 927.971 | 2 | 45.07 | 166587   | 43.39 | 30976200 | 241.551 |
| DNNALGTFDLSGIPPAPR         | Hsp70Bb | Major heat shock 70 kDa protein Bb (Heat shock protein 70Bb) (HSP70-87C1 | 618.983 | 3 | 45.21 | 24051    | 43.65 | 6711729  | 362.513 |
| ETAEAYLGESITDAVITVPAYFNDSC | Hsp70Bb | Major heat shock 70 kDa protein Bb (Heat shock protein 70Bb) (HSP70-87C1 | 987.477 | 3 | 58.6  | 304104   | 58.36 | 1308713  | 5.59042 |
| FAPEEISSMVLTK              | Hsp70Bb | Major heat shock 70 kDa protein Bb (Heat shock protein 70Bb) (HSP70-87C1 | 726.376 | 2 | 41.77 | 22231    | 41.79 | 11132469 | 650.511 |
| FAPEEISSMVLTK              | Hsp70Bb | Major heat shock 70 kDa protein Bb (Heat shock protein 70Bb) (HSP70-87C1 | 484.587 | 3 | 41.77 | 0        | 41.79 | 276280   | #DIV/0! |
| FAPEEISSMVLTK              | Hsp70Bb | Major heat shock 70 kDa protein Bb (Heat shock protein 70Bb) (HSP70-87C1 | 734.374 | 2 | 35.12 | 297494   | 34.86 | 2047640  | 8.94124 |
| FEELCADLFR                 | Hsp70Bb | Major heat shock 70 kDa protein Bb (Heat shock protein 70Bb) (HSP70-87C1 | 650.306 | 2 | 41.55 | 32123    | 41.36 | 4667637  | 188.757 |
| GQIHDIIVLVGGSTR            | Hsp70Bb | Major heat shock 70 kDa protein Bb (Heat shock protein 70Bb) (HSP70-87C1 | 726.402 | 2 | 27.66 | 141880   | 27.58 | 2013950  | 18.4395 |
| GQIHDIIVLVGGSTR            | Hsp70Bb | Major heat shock 70 kDa protein Bb (Heat shock protein 70Bb) (HSP70-87C1 | 484.604 | 3 | 27.43 | 42940    | 27.54 | 4848927  | 146.692 |
| HCSPIMTK                   | Hsp70Bb | Major heat shock 70 kDa protein Bb (Heat shock protein 70Bb) (HSP70-87C1 | 487.233 | 2 | 11.2  | 35165    | 11.25 | 2786296  | 102.929 |
| HCSPIMTK                   | Hsp70Bb | Major heat shock 70 kDa protein Bb (Heat shock protein 70Bb) (HSP70-87C1 | 495.231 | 2 | 9.26  | 11777    | 9.24  | 218205   | 24.0687 |
| IQDVLLVDVAPLSLGIETAGGVMTK  | Hsp70Bb | Major heat shock 70 kDa protein Bb (Heat shock protein 70Bb) (HSP70-87C1 | 1270.21 | 2 | 61.32 | 0        | 61.17 | 571901   | #DIV/0! |
| IQDVLLVDVAPLSLGIETAGGVMTK  | Hsp70Bb | Major heat shock 70 kDa protein Bb (Heat shock protein 70Bb) (HSP70-87C1 | 847.14  | 3 | 61.32 | 519      | 61.21 | 3335041  | 8347.49 |
| IQDVLLVDVAPLSLGIETAGGVMTK  | Hsp70Bb | Major heat shock 70 kDa protein Bb (Heat shock protein 70Bb) (HSP70-87C1 | 852.472 | 3 | 57.66 | 0        | 57.38 | 359486   | #DIV/0! |
| LSQAEIDR                   | Hsp70Bb | Major heat shock 70 kDa protein Bb (Heat shock protein 70Bb) (HSP70-87C1 | 466.246 | 2 | 14.26 | 24538    | 14.28 | 4887219  | 258.729 |
| LVTHLAAEFK                 | Hsp70Bb | Major heat shock 70 kDa protein Bb (Heat shock protein 70Bb) (HSP70-87C1 | 593.827 | 2 | 25.94 | 371859   | 26.5  | 486802   | 1.70058 |
| NALESYVFNVK                | Hsp70Bb | Major heat shock 70 kDa protein Bb (Heat shock protein 70Bb) (HSP70-87C1 | 642.335 | 2 | 40.6  | 35451    | 38.81 | 48323708 | 1770.74 |
| NLNLSINPDEAVAYGAAVQAAILSGI | Hsp70Bb | Major heat shock 70 kDa protein Bb (Heat shock protein 70Bb) (HSP70-87C1 | 1493.76 | 2 | 58.87 | 44314    | 57.77 | 661805   | 19.4004 |
| NLNLSINPDEAVAYGAAVQAAILSGI | Hsp70Bb | Major heat shock 70 kDa protein Bb (Heat shock protein 70Bb) (HSP70-87C1 | 996.175 | 3 | 58.34 | 121646   | 57.81 | 3315510  | 35.4058 |
| NQVAMNPR                   | Hsp70Bb | Major heat shock 70 kDa protein Bb (Heat shock protein 70Bb) (HSP70-87C1 | 465.235 | 2 | 11.74 | 204889   | 11.84 | 365105   | 2.31484 |
| STAGDTHLGGEDFDNR           | Hsp70Bb | Major heat shock 70 kDa protein Bb (Heat shock protein 70Bb) (HSP70-87C1 | 846.366 | 2 | 18.67 | 1657789  | 18.65 | 1831600  | 1.43524 |
| STAGDTHLGGEDFDNR           | Hsp70Bb | Major heat shock 70 kDa protein Bb (Heat shock protein 70Bb) (HSP70-87C1 | 564.58  | 3 | 18.67 | 10781481 | 18.68 | 14815577 | 1.7851  |
| TFSTYSDNQPGVSIQVYEGER      | Hsp70Bb | Major heat shock 70 kDa protein Bb (Heat shock protein 70Bb) (HSP70-87C1 | 793.036 | 3 | 34.64 | 0        | 34.11 | 7628120  | #DIV/0! |
| TLSSSTEATIEIDALFEGQDFYTK   | Hsp70Bb | Major heat shock 70 kDa protein Bb (Heat shock protein 70Bb) (HSP70-87C1 | 1333.64 | 2 | 55.81 | 30514    | 54.36 | 4199024  | 178.76  |
| TLSSSTEATIEIDALFEGQDFYTK   | Hsp70Bb | Major heat shock 70 kDa protein Bb (Heat shock protein 70Bb) (HSP70-87C1 | 889.429 | 3 | 55.66 | 365012   | 54.36 | 14991373 | 53.3527 |
| TTPSYVAFTDSER              | Hsp70Bb | Major heat shock 70 kDa protein Bb (Heat shock protein 70Bb) (HSP70-87C1 | 737.346 | 2 | 28.48 | 159128   | 28.32 | 60403172 | 493.101 |



|                            |         |                                                                                    |         |   |       |          |       |          |         |
|----------------------------|---------|------------------------------------------------------------------------------------|---------|---|-------|----------|-------|----------|---------|
| TTPSYVAFTDSE               | Hsp70Bb | Major heat shock 70 kDa protein Bb (Heat shock protein 70Bb) (HSP70-87C1           | 491.9   | 3 | 28.44 | 0        | 28.4  | 323797   | #DIV/0! |
| VEIIANDQGNR                | Hsp70Bb | Major heat shock 70 kDa protein Bb (Heat shock protein 70Bb) (HSP70-87C1           | 614.818 | 2 | 18.24 | 20421124 | 18.27 | 30231408 | 1.9231  |
| VQSLLEQFFHGK               | Hsp70Bb | Major heat shock 70 kDa protein Bb (Heat shock protein 70Bb) (HSP70-87C1           | 478.258 | 3 | 46.44 | 17592    | 46.3  | 17550354 | 1295.96 |
| HVELYNVGK                  | Jupiter | Microtubule-associated protein Jupiter                                             | 529.785 | 2 | 19.38 | 382263   | 19.41 | 547919   | 1.86199 |
| SSIPFGQNTAEVAAQK           | Jupiter | Microtubule-associated protein Jupiter                                             | 824.42  | 2 | 27.69 | 245096   | 27.65 | 643769   | 3.41206 |
| LFITESLQIAK                | eIF3h   | Eukaryotic translation initiation factor 3 subunit H (eIF3h) (Eukaryotic translati | 631.871 | 2 | 42.05 | 120480   | 41.83 | 127256   | 1.3721  |
| TLIDDDNPPVSFVK             | wds     | Protein will die slowly                                                            | 780.401 | 2 | 38.13 | 2624767  | 37.75 | 1560803  | 0.77247 |
| DYGVLEDEETGIPFR            | Jafrac1 | Peroxiredoxin 1 (EC 1.11.1.15) (Cytosolic thioredoxin peroxidase) (DPx-4783)       | 805.888 | 2 | 42.29 | 1389123  | 42.06 | 1525411  | 1.42649 |
| SVEETLR                    | Jafrac1 | Peroxiredoxin 1 (EC 1.11.1.15) (Cytosolic thioredoxin peroxidase) (DPx-4783)       | 417.222 | 2 | 14.57 | 798318   | 14.56 | 716777   | 1.16635 |
| FTILPHDFSIPTGELGPTLK       | bgm     | Very long-chain-fatty-acid--CoA ligase bubblegum (EC 6.2.1.3)                      | 728.396 | 3 | 49.95 | 906351   | 49.6  | 472601   | 0.67736 |
| LCQGNADATIR                | Aac11   | Apoptosis inhibitor 5 homolog (API-5) (Antiapoptosis clone 11 protein homolog      | 609.798 | 2 | 14.57 | 226422   | 14.52 | 122831   | 0.70471 |
| HAQDYSLEASAK               | apolpp  | Apolipoporphins (Retinoid- and fatty acid-binding glycoprotein) [Cleaved into: A   | 660.315 | 2 | 14.87 | 331176   | 14.8  | 247926   | 0.97249 |
| ECTIHLAK                   | Rpl31   | 60S ribosomal protein L31                                                          | 486.253 | 2 | 15.49 | 2304010  | 15.43 | 1332958  | 0.75154 |
| EMGTTDVR                   | Rpl31   | 60S ribosomal protein L31                                                          | 454.711 | 2 | 11.66 | 962059   | 11.76 | 382662   | 0.5167  |
| LYTYVTVVPVSTFK             | Rpl31   | 60S ribosomal protein L31                                                          | 840.948 | 2 | 43.44 | 4801252  | 43.21 | 4022424  | 1.08832 |
| NLQTENVESDD                | Rpl31   | 60S ribosomal protein L31                                                          | 675.786 | 2 | 15.99 | 4997861  | 15.98 | 2747102  | 0.71402 |
| SAINEVVTR                  | Rpl31   | 60S ribosomal protein L31                                                          | 494.775 | 2 | 20.13 | 20293016 | 20.13 | 19123418 | 1.22417 |
| VHNIGFK                    | Rpl31   | 60S ribosomal protein L31                                                          | 407.732 | 2 | 14.79 | 1318964  | 14.79 | 735432   | 0.72432 |
| EQQYISSVDPK                | cora    | Protein 4.1 homolog (Protein coracle)                                              | 690.836 | 2 | 19.72 | 1077568  | 19.73 | 711194   | 0.85736 |
| IAPNQTALEDK                | cora    | Protein 4.1 homolog (Protein coracle)                                              | 664.838 | 2 | 18.46 | 483773   | 18.46 | 266610   | 0.71591 |
| ITIQSDGDPIDHDK             | cora    | Protein 4.1 homolog (Protein coracle)                                              | 518.586 | 3 | 21.49 | 444280   | 21.51 | 465036   | 1.35973 |
| LDDTLGQVICITPQDNPVVELTVITS | cora    | Protein 4.1 homolog (Protein coracle)                                              | 999.525 | 3 | 60.96 | 477920   | 60.76 | 355750   | 0.96697 |
| LGKPVSTPTVVK               | cora    | Protein 4.1 homolog (Protein coracle)                                              | 409.255 | 3 | 19.33 | 1398453  | 19.26 | 958082   | 0.88997 |
| LGLVVTSGLDGNQQDQNLDEAAR    | cora    | Protein 4.1 homolog (Protein coracle)                                              | 805.07  | 3 | 37.08 | 2956134  | 36.91 | 3245204  | 1.42607 |
| LIEVGQQIDPIVEVTSLAGK       | cora    | Protein 4.1 homolog (Protein coracle)                                              | 1055.09 | 2 | 52.4  | 1797413  | 52.06 | 1009797  | 0.72981 |
| LIEVGQQIDPIVEVTSLAGK       | cora    | Protein 4.1 homolog (Protein coracle)                                              | 703.732 | 3 | 52.36 | 1187434  | 52.06 | 855614   | 0.93603 |
| LILNYAQIDPSSHFGK           | cora    | Protein 4.1 homolog (Protein coracle)                                              | 572.642 | 3 | 39.99 | 1926732  | 39.77 | 2328472  | 1.5699  |
| LLQDPLLSPTR                | cora    | Protein 4.1 homolog (Protein coracle)                                              | 677.39  | 2 | 36.71 | 1818393  | 36.6  | 2546599  | 1.81926 |
| LQGSAVDAAAVPLSDSQK         | cora    | Protein 4.1 homolog (Protein coracle)                                              | 878.957 | 2 | 28.08 | 902207   | 28    | 1209649  | 1.74171 |
| MFPVFGSTYR                 | cora    | Protein 4.1 homolog (Protein coracle)                                              | 610.792 | 2 | 35.32 | 1647098  | 35.1  | 1475401  | 1.16362 |
| NIDGVTHNVEEEVR             | cora    | Protein 4.1 homolog (Protein coracle)                                              | 805.892 | 2 | 25.19 | 772422   | 25.18 | 383894   | 0.64562 |
| NIDGVTHNVEEEVR             | cora    | Protein 4.1 homolog (Protein coracle)                                              | 537.597 | 3 | 25.23 | 1472968  | 25.14 | 947257   | 0.8354  |
| QAQVQTTTETVPITR            | cora    | Protein 4.1 homolog (Protein coracle)                                              | 836.947 | 2 | 22.76 | 1243364  | 22.75 | 1875309  | 1.95928 |
| QAQVQTTTETVPITR            | cora    | Protein 4.1 homolog (Protein coracle)                                              | 558.3   | 3 | 22.72 | 338192   | 22.75 | 517745   | 1.98873 |
| SLGLVNLDTGLLDTK            | cora    | Protein 4.1 homolog (Protein coracle)                                              | 779.938 | 2 | 48.49 | 4006855  | 48.22 | 3396143  | 1.10104 |
| SPLFTTSATTGPHVEST          | cora    | Protein 4.1 homolog (Protein coracle)                                              | 630.318 | 3 | 26.47 | 4223504  | 26.38 | 3945529  | 1.21354 |
| SSSSSHGKPALAR              | cora    | Protein 4.1 homolog (Protein coracle)                                              | 642.836 | 2 | 8.36  | 115696   | 8.51  | 27955    | 0.31388 |
| SSSSSHGKPALAR              | cora    | Protein 4.1 homolog (Protein coracle)                                              | 428.893 | 3 | 8.36  | 446429   | 8.49  | 229562   | 0.66799 |
| TAQVETSGGQDFPK             | cora    | Protein 4.1 homolog (Protein coracle)                                              | 732.852 | 2 | 18.64 | 2712306  | 18.61 | 2930955  | 1.40376 |
| TDTWPLTFAVK                | cora    | Protein 4.1 homolog (Protein coracle)                                              | 639.84  | 2 | 45.17 | 2241253  | 44.93 | 1441517  | 0.83551 |
| TGNLHLVSGVADPK             | cora    | Protein 4.1 homolog (Protein coracle)                                              | 469.925 | 3 | 24.12 | 894256   | 24.12 | 482494   | 0.70089 |
| TGYVITYGYLDPK              | cora    | Protein 4.1 homolog (Protein coracle)                                              | 801.924 | 2 | 47.28 | 1483311  | 47.07 | 1539226  | 1.34801 |
| TQAESTNTPVDR               | cora    | Protein 4.1 homolog (Protein coracle)                                              | 659.815 | 2 | 10.52 | 427177   | 10.65 | 96821    | 0.29443 |
| TTATVTSGDQYQR              | cora    | Protein 4.1 homolog (Protein coracle)                                              | 714.342 | 2 | 13.07 | 702928   | 13.03 | 163813   | 0.30273 |
| TTVHTMTLTGEIDPVTGR         | cora    | Protein 4.1 homolog (Protein coracle)                                              | 677.346 | 3 | 32.9  | 1242941  | 32.67 | 1420656  | 1.48478 |
| TVYYVNMIDPVTGEIVQVDPNDPR   | cora    | Protein 4.1 homolog (Protein coracle)                                              | 912.118 | 3 | 48.94 | 447629   | 48.63 | 338096   | 0.98117 |
| VTLLDGSLLDVSDR             | cora    | Protein 4.1 homolog (Protein coracle)                                              | 808.449 | 2 | 50.48 | 2980908  | 50.17 | 1512386  | 0.65908 |
| VVLGEDTPGFSGHGEIISTQTVSSK  | cora    | Protein 4.1 homolog (Protein coracle)                                              | 849.098 | 3 | 34.36 | 2644169  | 34.26 | 2132465  | 1.04765 |
| YGVIDPK                    | cora    | Protein 4.1 homolog (Protein coracle)                                              | 396.219 | 2 | 18.74 | 1027816  | 18.73 | 968797   | 1.22445 |
| SAFIQVLESSYR               | aralar1 | Calcium-binding mitochondrial carrier protein Aralar1                              | 700.364 | 2 | 43.03 | 477153   | 42.8  | 602689   | 1.64081 |
| AVIIYVPIPQQK               | RpS7    | 40S ribosomal protein S7                                                           | 684.916 | 2 | 41.28 | 8471675  | 41.1  | 6545686  | 1.00371 |
| DLHITR                     | RpS7    | 40S ribosomal protein S7                                                           | 377.714 | 2 | 14.71 | 21152176 | 14.72 | 16014808 | 0.98353 |
| DVTFEFPDNYLNV              | RpS7    | 40S ribosomal protein S7                                                           | 786.864 | 2 | 53.99 | 23061740 | 53.69 | 18809548 | 1.05952 |

|                            |          |                                                                            |         |   |       |          |       |          |         |
|----------------------------|----------|----------------------------------------------------------------------------|---------|---|-------|----------|-------|----------|---------|
| HVVVIAER                   | RpS7     | 40S ribosomal protein S7                                                   | 461.777 | 2 | 15.49 | 20082808 | 15.46 | 11177676 | 0.72302 |
| IIKPGGSDPDDFEK             | RpS7     | 40S ribosomal protein S7                                                   | 759.378 | 2 | 20.47 | 4039644  | 20.43 | 3343605  | 1.07521 |
| IIKPGGSDPDDFEK             | RpS7     | 40S ribosomal protein S7                                                   | 506.588 | 3 | 20.47 | 25628294 | 20.43 | 25835260 | 1.30953 |
| IQIILVR                    | RpS7     | 40S ribosomal protein S7                                                   | 427.795 | 2 | 36.3  | 22111984 | 36.14 | 13910792 | 0.81723 |
| SIAQALVELEANSCLKPYLR       | RpS7     | 40S ribosomal protein S7                                                   | 1115.61 | 2 | 52.69 | 3635581  | 52.52 | 3184821  | 1.13798 |
| SIAQALVELEANSCLKPYLR       | RpS7     | 40S ribosomal protein S7                                                   | 744.074 | 3 | 52.73 | 38728332 | 52.56 | 37722616 | 1.26531 |
| SIAQALVELEANSCLKPYLR       | RpS7     | 40S ribosomal protein S7                                                   | 558.307 | 4 | 52.69 | 4180332  | 52.56 | 3628128  | 1.12744 |
| TLTAVYDAILEDLVFPAEIVGK     | RpS7     | 40S ribosomal protein S7                                                   | 1189.15 | 2 | 65.64 | 2919810  | 65.67 | 1234142  | 0.54908 |
| TLTAVYDAILEDLVFPAEIVGK     | RpS7     | 40S ribosomal protein S7                                                   | 793.102 | 3 | 65.64 | 2850982  | 65.67 | 1260429  | 0.57431 |
| VDFTTSVYK                  | RpS7     | 40S ribosomal protein S7                                                   | 530.271 | 2 | 25.44 | 3847964  | 25.35 | 1682874  | 0.56812 |
| LYPTVVVQPDGSTINIR          | mRpL55   | 39S ribosomal protein L55, mitochondrial (L55mt) (MRP-L55)                 | 936.515 | 2 | 39.28 | 1074393  | 39.08 | 1040329  | 1.25785 |
| AQCPIVER                   | RpS5b    | 40S ribosomal protein S5b                                                  | 486.75  | 2 | 14.71 | 806831   | 14.72 | 445526   | 0.71732 |
| QAVDVSPRLR                 | RpS5b    | 40S ribosomal protein S5b                                                  | 492.777 | 2 | 23.02 | 630384   | 23.02 | 403036   | 0.83054 |
| AMELYR                     | Cyp313a1 | Probable cytochrome P450 313a1 (EC 1.14.-.-) (CYPCCCXIIIA1)                | 391.697 | 2 | 20.4  | 76256    | 20.44 | 242871   | 4.13737 |
| LIPAIPITAR                 | Cyp313a1 | Probable cytochrome P450 313a1 (EC 1.14.-.-) (CYPCCCXIIIA1)                | 532.845 | 2 | 37.91 | 41055    | 37.76 | 3413281  | 108.001 |
| TDSDPESNIVINR              | Cyp313a1 | Probable cytochrome P450 313a1 (EC 1.14.-.-) (CYPCCCXIIIA1)                | 730.355 | 2 | 24.08 | 276064   | 23.37 | 1685356  | 7.93057 |
| VVEDIFSSPDCHNK             | Cyp313a1 | Probable cytochrome P450 313a1 (EC 1.14.-.-) (CYPCCCXIIIA1)                | 549.587 | 3 | 26.43 | 0        | 26.43 | 281780   | #DIV/0! |
| ASQELGLR                   | Htra2    | Serine protease HTRA2, mitochondrial (EC 3.4.21.108) (High temperature rec | 437.243 | 2 | 17.76 | 957616   | 17.79 | 498328   | 0.676   |
| TFPATIEDVDQTSDLATLR        | Htra2    | Serine protease HTRA2, mitochondrial (EC 3.4.21.108) (High temperature rec | 1047.02 | 2 | 42.81 | 1456762  | 42.55 | 805342   | 0.71815 |
| TLDIVILR                   | Htra2    | Serine protease HTRA2, mitochondrial (EC 3.4.21.108) (High temperature rec | 471.803 | 2 | 41.14 | 1392585  | 40.98 | 994282   | 0.92749 |
| VTAGISFAIPIDYVK            | Htra2    | Serine protease HTRA2, mitochondrial (EC 3.4.21.108) (High temperature rec | 797.448 | 2 | 50.05 | 817270   | 49.8  | 294920   | 0.46877 |
| DAGHIAGLNVL                | Hsp70Bbl | Major heat shock 70 kDa protein Bbb (Heat shock protein 70Bbb) (HSP70-87)  | 618.346 | 2 | 31.67 | 40614    | 31.54 | 13040718 | 417.108 |
| DAGHIAGLNVL                | Hsp70Bbl | Major heat shock 70 kDa protein Bbb (Heat shock protein 70Bbb) (HSP70-87)  | 412.567 | 3 | 31.59 | 26572    | 31.54 | 33980956 | 1661.24 |
| DNNALGTFDLSGIPPAPR         | Hsp70Bbl | Major heat shock 70 kDa protein Bbb (Heat shock protein 70Bbb) (HSP70-87)  | 927.971 | 2 | 45.07 | 166587   | 43.39 | 30976200 | 241.551 |
| DNNALGTFDLSGIPPAPR         | Hsp70Bbl | Major heat shock 70 kDa protein Bbb (Heat shock protein 70Bbb) (HSP70-87)  | 618.983 | 3 | 45.21 | 24051    | 43.65 | 6711729  | 362.513 |
| ETAAYLGSITDAVITVPAYFNDSC   | Hsp70Bbl | Major heat shock 70 kDa protein Bbb (Heat shock protein 70Bbb) (HSP70-87)  | 987.477 | 3 | 58.6  | 304104   | 58.36 | 1308713  | 5.59042 |
| FAPEEISSMVLTK              | Hsp70Bbl | Major heat shock 70 kDa protein Bbb (Heat shock protein 70Bbb) (HSP70-87)  | 726.376 | 2 | 41.77 | 22231    | 41.79 | 11132469 | 650.511 |
| FAPEEISSMVLTK              | Hsp70Bbl | Major heat shock 70 kDa protein Bbb (Heat shock protein 70Bbb) (HSP70-87)  | 484.587 | 3 | 41.77 | 0        | 41.79 | 276280   | #DIV/0! |
| FAPEEISSMVLTK              | Hsp70Bbl | Major heat shock 70 kDa protein Bbb (Heat shock protein 70Bbb) (HSP70-87)  | 734.374 | 2 | 35.12 | 297494   | 34.86 | 2047640  | 8.94124 |
| FEELCADLFR                 | Hsp70Bbl | Major heat shock 70 kDa protein Bbb (Heat shock protein 70Bbb) (HSP70-87)  | 650.306 | 2 | 41.55 | 32123    | 41.36 | 4667637  | 188.757 |
| GQIHDIVLVGGSTR             | Hsp70Bbl | Major heat shock 70 kDa protein Bbb (Heat shock protein 70Bbb) (HSP70-87)  | 726.402 | 2 | 27.66 | 141880   | 27.58 | 2013950  | 18.4395 |
| GQIHDIVLVGGSTR             | Hsp70Bbl | Major heat shock 70 kDa protein Bbb (Heat shock protein 70Bbb) (HSP70-87)  | 484.604 | 3 | 27.43 | 42940    | 27.54 | 4848927  | 146.692 |
| HCSPIMTK                   | Hsp70Bbl | Major heat shock 70 kDa protein Bbb (Heat shock protein 70Bbb) (HSP70-87)  | 487.233 | 2 | 11.2  | 35165    | 11.25 | 2786296  | 102.929 |
| HCSPIMTK                   | Hsp70Bbl | Major heat shock 70 kDa protein Bbb (Heat shock protein 70Bbb) (HSP70-87)  | 495.231 | 2 | 9.26  | 11777    | 9.24  | 218205   | 24.0687 |
| IQDVLLVDVAPLSLGIETAGGVMTK  | Hsp70Bbl | Major heat shock 70 kDa protein Bbb (Heat shock protein 70Bbb) (HSP70-87)  | 1270.21 | 2 | 61.32 | 0        | 61.17 | 571901   | #DIV/0! |
| IQDVLLVDVAPLSLGIETAGGVMTK  | Hsp70Bbl | Major heat shock 70 kDa protein Bbb (Heat shock protein 70Bbb) (HSP70-87)  | 847.14  | 3 | 61.32 | 519      | 61.21 | 3335041  | 8347.49 |
| IQDVLLVDVAPLSLGIETAGGVMTK  | Hsp70Bbl | Major heat shock 70 kDa protein Bbb (Heat shock protein 70Bbb) (HSP70-87)  | 852.472 | 3 | 57.66 | 0        | 57.38 | 359486   | #DIV/0! |
| LSQAEIDR                   | Hsp70Bbl | Major heat shock 70 kDa protein Bbb (Heat shock protein 70Bbb) (HSP70-87)  | 466.246 | 2 | 14.26 | 24538    | 14.28 | 4887219  | 258.729 |
| LVTHLAEFEK                 | Hsp70Bbl | Major heat shock 70 kDa protein Bbb (Heat shock protein 70Bbb) (HSP70-87)  | 593.827 | 2 | 25.94 | 371859   | 26.5  | 486802   | 1.70058 |
| NALESYVFNVK                | Hsp70Bbl | Major heat shock 70 kDa protein Bbb (Heat shock protein 70Bbb) (HSP70-87)  | 642.335 | 2 | 40.6  | 35451    | 38.81 | 48323708 | 1770.74 |
| NLNLSINPDEAVAYGAAVQAAILSGI | Hsp70Bbl | Major heat shock 70 kDa protein Bbb (Heat shock protein 70Bbb) (HSP70-87)  | 1493.76 | 2 | 58.87 | 44314    | 57.77 | 661805   | 19.4004 |
| NLNLSINPDEAVAYGAAVQAAILSGI | Hsp70Bbl | Major heat shock 70 kDa protein Bbb (Heat shock protein 70Bbb) (HSP70-87)  | 996.175 | 3 | 58.34 | 121646   | 57.81 | 3315510  | 35.4058 |
| NQVAMNPR                   | Hsp70Bbl | Major heat shock 70 kDa protein Bbb (Heat shock protein 70Bbb) (HSP70-87)  | 465.235 | 2 | 11.74 | 204889   | 11.84 | 365105   | 2.31484 |
| STAGDTHLGGEDFDNR           | Hsp70Bbl | Major heat shock 70 kDa protein Bbb (Heat shock protein 70Bbb) (HSP70-87)  | 846.366 | 2 | 18.67 | 1657789  | 18.65 | 1831600  | 1.43524 |
| STAGDTHLGGEDFDNR           | Hsp70Bbl | Major heat shock 70 kDa protein Bbb (Heat shock protein 70Bbb) (HSP70-87)  | 564.58  | 3 | 18.67 | 10781481 | 18.68 | 14815577 | 1.7851  |
| TFSTYSDNQPGVSIQVYEGER      | Hsp70Bbl | Major heat shock 70 kDa protein Bbb (Heat shock protein 70Bbb) (HSP70-87)  | 793.036 | 3 | 34.64 | 0        | 34.11 | 7628120  | #DIV/0! |
| TLSSSTEATIEIDALFEGQDFYTK   | Hsp70Bbl | Major heat shock 70 kDa protein Bbb (Heat shock protein 70Bbb) (HSP70-87)  | 1333.64 | 2 | 55.81 | 30514    | 54.36 | 4199024  | 178.76  |
| TLSSSTEATIEIDALFEGQDFYTK   | Hsp70Bbl | Major heat shock 70 kDa protein Bbb (Heat shock protein 70Bbb) (HSP70-87)  | 889.429 | 3 | 55.66 | 365012   | 54.36 | 14991373 | 53.3527 |
| TTPSYVAFTDSE               | Hsp70Bbl | Major heat shock 70 kDa protein Bbb (Heat shock protein 70Bbb) (HSP70-87)  | 737.346 | 2 | 28.48 | 159128   | 28.32 | 60403172 | 493.101 |
| TTPSYVAFTDSE               | Hsp70Bbl | Major heat shock 70 kDa protein Bbb (Heat shock protein 70Bbb) (HSP70-87)  | 491.9   | 3 | 28.44 | 0        | 28.4  | 323797   | #DIV/0! |
| VEIANDQGNR                 | Hsp70Bbl | Major heat shock 70 kDa protein Bbb (Heat shock protein 70Bbb) (HSP70-87)  | 614.818 | 2 | 18.24 | 20421124 | 18.27 | 30231408 | 1.9231  |
| VQSLLEQFFHGK               | Hsp70Bbl | Major heat shock 70 kDa protein Bbb (Heat shock protein 70Bbb) (HSP70-87)  | 478.258 | 3 | 46.44 | 17592    | 46.3  | 17550354 | 1295.96 |
| EYANDIGFK                  | RpS29    | 40S ribosomal protein S29                                                  | 528.753 | 2 | 24.55 | 5298011  | 24.52 | 4571746  | 1.12096 |

|                        |         |                                                                             |         |   |       |          |       |         |         |
|------------------------|---------|-----------------------------------------------------------------------------|---------|---|-------|----------|-------|---------|---------|
| YGLNICR                | RpS29   | 40S ribosomal protein S29                                                   | 448.226 | 2 | 23.96 | 2206338  | 23.96 | 2842385 | 1.67353 |
| HVINFDLPDVEEYVHR       | bel     | ATP-dependent RNA helicase bel (EC 3.6.4.13) (Protein belle)                | 690.341 | 3 | 42.33 | 52327    | 42.25 | 363307  | 9.01925 |
| SGDCPILVATAVAAR        | bel     | ATP-dependent RNA helicase bel (EC 3.6.4.13) (Protein belle)                | 750.896 | 2 | 37.72 | 71006    | 37.48 | 451861  | 8.2667  |
| GDSVILVLR              | SmD2    | Probable small nuclear ribonucleoprotein Sm D2 (Sm-D2) (snRNP core protei   | 486.298 | 2 | 36.9  | 739361   | 36.72 | 471765  | 0.82888 |
| NNTQVLINCR             | SmD2    | Probable small nuclear ribonucleoprotein Sm D2 (Sm-D2) (snRNP core protei   | 616.314 | 2 | 20.03 | 394622   | 20.01 | 371111  | 1.22164 |
| FAVNVDSPSR             | hgo     | Homogentisate 1,2-dioxygenase (EC 1.13.11.5) (Homogentisate oxygenase)      | 546.278 | 2 | 23.05 | 15449    | 23.22 | 111077  | 9.33998 |
| ELSNLESVNPK            | KFase   | Kynurenine formamidase (KFA) (KFase) (EC 3.5.1.9) (Arylformamidase) (N-fc   | 615.322 | 2 | 23.24 | 109557   | 23.14 | 186670  | 2.21338 |
| HYADVLR                | KFase   | Kynurenine formamidase (KFA) (KFase) (EC 3.5.1.9) (Arylformamidase) (N-fc   | 437.233 | 2 | 16.26 | 45711    | 16.22 | 111969  | 3.18199 |
| AAVEEGIVPGGGTALLR      | Hsp60C  | 60 kDa heat shock protein homolog 2, mitochondrial (60 kDa chaperonin) (CP  | 805.449 | 2 | 37.57 | 3201747  | 37.41 | 3272869 | 1.3279  |
| FGPEVR                 | Hsp60C  | 60 kDa heat shock protein homolog 2, mitochondrial (60 kDa chaperonin) (CP  | 352.69  | 2 | 17.41 | 1545828  | 17.45 | 1317497 | 1.10716 |
| LVQDVANNTNEEAGDGTATVLA | Hsp60C  | 60 kDa heat shock protein homolog 2, mitochondrial (60 kDa chaperonin) (CP  | 854.088 | 3 | 28.53 | 1313197  | 28.39 | 1332802 | 1.31843 |
| TVAGGAWVYSTAAASVR      | RpL37A  | 60S ribosomal protein L37a                                                  | 884.455 | 2 | 35.51 | 1995172  | 35.37 | 2313941 | 1.50659 |
| TVAGGAWVYSTAAASVR      | RpL37A  | 60S ribosomal protein L37a                                                  | 589.972 | 3 | 35.55 | 824979   | 35.33 | 1038904 | 1.63589 |
| YTCSFGAK               | RpL37A  | 60S ribosomal protein L37a                                                  | 511.707 | 2 | 15.1  | 296011   | 15.08 | 174740  | 0.76684 |
| AGIVVFPDQK             | CG1218  | Histone PARylation factor 1-like                                            | 537.303 | 2 | 33.47 | 6646903  | 33.37 | 2268859 | 0.44342 |
| ENLLIAR                | CG1218  | Histone PARylation factor 1-like                                            | 414.751 | 2 | 25.57 | 440852   | 25.56 | 381848  | 1.12517 |
| EYDNLCSNEFIR           | CG1218  | Histone PARylation factor 1-like                                            | 844.865 | 2 | 31.63 | 1959522  | 31.49 | 1062272 | 0.70422 |
| FYYDPPEFQTIFVR         | CG1218  | Histone PARylation factor 1-like                                            | 911.446 | 2 | 50.48 | 8389040  | 50.25 | 4055532 | 0.628   |
| FYYDPPEFQTIFVR         | CG1218  | Histone PARylation factor 1-like                                            | 607.966 | 3 | 50.51 | 2678767  | 50.25 | 1143147 | 0.55436 |
| GSYEAETEELHK           | CG1218  | Histone PARylation factor 1-like                                            | 696.818 | 2 | 16.22 | 381862   | 16.21 | 235605  | 0.80149 |
| GSYEAETEELHK           | CG1218  | Histone PARylation factor 1-like                                            | 464.881 | 3 | 16.26 | 1101486  | 16.21 | 539771  | 0.63658 |
| GTGIHYGYWR             | CG1218  | Histone PARylation factor 1-like                                            | 403.865 | 3 | 25.27 | 2081514  | 25.22 | 1172175 | 0.73154 |
| LGEPGDYLR              | CG1218  | Histone PARylation factor 1-like                                            | 510.261 | 2 | 26.16 | 9221286  | 26.15 | 4720985 | 0.66506 |
| NYMEILEK               | CG1218  | Histone PARylation factor 1-like                                            | 528.258 | 2 | 23.59 | 1700695  | 23.69 | 1243872 | 0.9501  |
| TEVGYRPLAVSDSELK       | CG1218  | Histone PARylation factor 1-like                                            | 588.644 | 3 | 29.33 | 2716172  | 29.24 | 976468  | 0.46701 |
| VFQLQLVGPFEFLAGK       | CG1218  | Histone PARylation factor 1-like                                            | 897.003 | 2 | 62.82 | 2086123  | 62.5  | 439462  | 0.27366 |
| YLSDNLELAQLDR          | CG1218  | Histone PARylation factor 1-like                                            | 818.912 | 2 | 37.05 | 13109144 | 36.87 | 7556711 | 0.74883 |
| AGGEVLTDFDQLALR        | RpL18   | 60S ribosomal protein L18                                                   | 745.404 | 2 | 43.73 | 1193950  | 43.51 | 848280  | 0.92294 |
| LTVCALHVTQTAR          | RpL18   | 60S ribosomal protein L18                                                   | 490.601 | 3 | 26.12 | 441082   | 25.98 | 561270  | 1.65301 |
| GFLETVELQIGLK          | RpL10Ab | 60S ribosomal protein L10a-2                                                | 723.914 | 2 | 52.78 | 971368   | 52.52 | 1026785 | 1.37315 |
| VCILGDQQHCDEAK         | RpL10Ab | 60S ribosomal protein L10a-2                                                | 558.252 | 3 | 18.98 | 72010    | 18.85 | 119507  | 2.15587 |
| GDVGPAGEVEFR           | RpS10b  | 40S ribosomal protein S10b                                                  | 645.31  | 2 | 25.28 | 985914   | 25.27 | 757708  | 0.99836 |
| SETVRPRPAVGGPR         | RpS10b  | 40S ribosomal protein S10b                                                  | 493.611 | 3 | 12.12 | 3082161  | 12.12 | 2287000 | 0.9639  |
| VAIYEYLFK              | RpS10b  | 40S ribosomal protein S10b                                                  | 573.316 | 2 | 46.67 | 2373270  | 46.49 | 2589560 | 1.41743 |
| EFNLVANVRPCR           | ldh3a   | Probable isocitrate dehydrogenase [NAD] subunit alpha, mitochondrial (EC 1. | 513.589 | 3 | 29.84 | 848933   | 29.81 | 651759  | 0.99732 |
| FGIPQAAIDSVNTNK        | ldh3a   | Probable isocitrate dehydrogenase [NAD] subunit alpha, mitochondrial (EC 1. | 787.912 | 2 | 35.39 | 2155730  | 35.25 | 1591635 | 0.95912 |
| FGIPQAAIDSVNTNK        | ldh3a   | Probable isocitrate dehydrogenase [NAD] subunit alpha, mitochondrial (EC 1. | 525.611 | 3 | 35.39 | 544207   | 35.25 | 192014  | 0.45834 |
| SLNLALR                | ldh3a   | Probable isocitrate dehydrogenase [NAD] subunit alpha, mitochondrial (EC 1. | 393.745 | 2 | 28.83 | 871937   | 28.75 | 602945  | 0.89829 |
| VAEYAFQYAK             | ldh3a   | Probable isocitrate dehydrogenase [NAD] subunit alpha, mitochondrial (EC 1. | 595.298 | 2 | 27.05 | 2240918  | 26.93 | 1780133 | 1.03193 |
| YLTGDLGGR              | ldh3a   | Probable isocitrate dehydrogenase [NAD] subunit alpha, mitochondrial (EC 1. | 476.248 | 2 | 21.45 | 1896980  | 21.42 | 1761025 | 1.20594 |
| AAGITYIQYSNIAAR        | sun     | Protein stunted                                                             | 806.428 | 2 | 34.52 | 1247977  | 34.41 | 1191664 | 1.24042 |
| FAGVDIR                | RpS16   | 40S ribosomal protein S16                                                   | 389.216 | 2 | 25.71 | 4573283  | 25.68 | 6173631 | 1.75362 |
| LQEPLLLGK              | RpS16   | 40S ribosomal protein S16                                                   | 562.358 | 2 | 43.68 | 9036494  | 43.47 | 7008865 | 1.00756 |
| FVNLPIFESTVLNCFVR      | Rtf1    | RNA polymerase-associated protein Rtf1 (dRtf1)                              | 1028.04 | 2 | 65.6  | 62022    | 62.58 | 33158   | 0.69449 |
| ALEIEPYSIEEAER         | CG3224  | Zinc finger protein 593 homolog                                             | 824.907 | 2 | 36.66 | 666577   | 36.48 | 735612  | 1.43358 |
| FDPYIQQESLYR           | mRpL33  | 39S ribosomal protein L33, mitochondrial (L33mt) (MRP-L33)                  | 779.88  | 2 | 33.19 | 1291543  | 33.09 | 470049  | 0.47278 |
| IMVVLESVSGHQFNFR       | mRpL33  | 39S ribosomal protein L33, mitochondrial (L33mt) (MRP-L33)                  | 678.359 | 3 | 47.98 | 1127158  | 47.81 | 717883  | 0.82735 |
| FLYTLVVQDK             | RpL38   | 60S ribosomal protein L38                                                   | 613.345 | 2 | 38.8  | 2657415  | 38.5  | 2241895 | 1.09592 |
| TSYAVAIASAFFFER        | ox      | Cytochrome b-c1 complex subunit 9 (Complex III subunit 9) (Complex III subu | 947.491 | 2 | 65.61 | 437672   | 65.23 | 267890  | 0.79512 |
| AFIVKPIPSPEVIPVFINPK   | rdgA    | Diacylglycerol kinase (DAG kinase) (EC 2.7.1.107)                           | 806.491 | 3 | 58.34 | 7861730  | 58.25 | 6537246 | 1.08019 |
| AFIVKPIPSPEVIPVFINPK   | rdgA    | Diacylglycerol kinase (DAG kinase) (EC 2.7.1.107)                           | 605.12  | 4 | 58.3  | 339552   | 58.29 | 268976  | 1.02903 |
| ALGWGGGYTDEPIGK        | rdgA    | Diacylglycerol kinase (DAG kinase) (EC 2.7.1.107)                           | 760.873 | 2 | 33.66 | 1454790  | 33.49 | 1166978 | 1.04204 |
| ALHEQGYSLQSVNK         | rdgA    | Diacylglycerol kinase (DAG kinase) (EC 2.7.1.107)                           | 525.27  | 3 | 20.1  | 844926   | 20.13 | 448176  | 0.68905 |

|                       |           |                                                                              |         |   |       |          |       |         |         |
|-----------------------|-----------|------------------------------------------------------------------------------|---------|---|-------|----------|-------|---------|---------|
| FEESISYPK             | rdgA      | Diacylglycerol kinase (DAG kinase) (EC 2.7.1.107)                            | 550.269 | 2 | 25.08 | 699628   | 25.06 | 249796  | 0.46381 |
| FMHLEK                | rdgA      | Diacylglycerol kinase (DAG kinase) (EC 2.7.1.107)                            | 410.705 | 2 | 11.03 | 406137   | 11.1  | 167691  | 0.53636 |
| FQHLLNPR              | rdgA      | Diacylglycerol kinase (DAG kinase) (EC 2.7.1.107)                            | 512.788 | 2 | 19.99 | 2182798  | 19.93 | 880908  | 0.52425 |
| GDVQVNPLEK            | rdgA      | Diacylglycerol kinase (DAG kinase) (EC 2.7.1.107)                            | 549.793 | 2 | 22.75 | 2434720  | 22.76 | 798326  | 0.42595 |
| GGSTDEDLQIGSKPIK      | rdgA      | Diacylglycerol kinase (DAG kinase) (EC 2.7.1.107)                            | 581.304 | 3 | 23.2  | 1491415  | 23.18 | 425538  | 0.37065 |
| LGNYAPIVPPSWIVK       | rdgA      | Diacylglycerol kinase (DAG kinase) (EC 2.7.1.107)                            | 884.014 | 2 | 52.63 | 3322956  | 52.44 | 1330008 | 0.51994 |
| NANEIATYLESQER        | rdgA      | Diacylglycerol kinase (DAG kinase) (EC 2.7.1.107)                            | 819.392 | 2 | 35.43 | 3962934  | 35.29 | 2961008 | 0.97061 |
| NANEIATYLESQER        | rdgA      | Diacylglycerol kinase (DAG kinase) (EC 2.7.1.107)                            | 546.597 | 3 | 35.43 | 1543644  | 35.29 | 934216  | 0.78618 |
| QVFDLTQGGPK           | rdgA      | Diacylglycerol kinase (DAG kinase) (EC 2.7.1.107)                            | 595.314 | 2 | 28.22 | 3580063  | 28.2  | 2623698 | 0.95202 |
| SFAAFSQR              | rdgA      | Diacylglycerol kinase (DAG kinase) (EC 2.7.1.107)                            | 457.23  | 2 | 23.28 | 6655876  | 23.37 | 6106585 | 1.19183 |
| TIPMQVDGEACR          | rdgA      | Diacylglycerol kinase (DAG kinase) (EC 2.7.1.107)                            | 688.818 | 2 | 23.21 | 1029594  | 23.29 | 655361  | 0.82687 |
| TIPMQVDGEACR          | rdgA      | Diacylglycerol kinase (DAG kinase) (EC 2.7.1.107)                            | 696.816 | 2 | 17.7  | 628084   | 17.41 | 337537  | 0.69811 |
| VKPSVIEIELLNK         | rdgA      | Diacylglycerol kinase (DAG kinase) (EC 2.7.1.107)                            | 741.451 | 2 | 38.07 | 1106361  | 37.96 | 617198  | 0.72469 |
| VKPSVIEIELLNK         | rdgA      | Diacylglycerol kinase (DAG kinase) (EC 2.7.1.107)                            | 494.636 | 3 | 38.07 | 3645006  | 37.92 | 2591446 | 0.92356 |
| VSQDWCFIDSCTAEHYFR    | rdgA      | Diacylglycerol kinase (DAG kinase) (EC 2.7.1.107)                            | 774.33  | 3 | 41.88 | 500902   | 41.72 | 464633  | 1.20498 |
| VTPNDDVTDHVDVDR       | rdgA      | Diacylglycerol kinase (DAG kinase) (EC 2.7.1.107)                            | 533.241 | 3 | 14.64 | 1483070  | 14.56 | 900190  | 0.78849 |
| YIIASATR              | rdgA      | Diacylglycerol kinase (DAG kinase) (EC 2.7.1.107)                            | 447.756 | 2 | 19.6  | 1081315  | 19.55 | 314198  | 0.37746 |
| VYDYPQTAELSSK         | ScsbetaA  | Succinate--CoA ligase [ADP-forming] subunit beta, mitochondrial (EC 6.2.1.5) | 783.388 | 2 | 26.05 | 1092441  | 25.98 | 763625  | 0.90804 |
| ILFAFGPVVEPYTTEHTVVAK | alpha-Est | Carboxylic ester hydrolase (EC 3.1.1.-)                                      | 773.419 | 3 | 44.7  | 30930    | 48.23 | 75260   | 3.16087 |
| AAIELNR               | CG9492    | Uncharacterized protein, isoform D (EC 3.6.1.3) (EC 3.6.4.5)                 | 393.727 | 2 | 17.87 | 27934492 | 17.87 | 8147882 | 0.3789  |
| ELAQQIQQVATEFGSSSYVR  | Rm62      | Rm62, isoform J                                                              | 747.71  | 3 | 48.34 | 417102   | 48.12 | 508191  | 1.58273 |
| FGGGGGFGDR            | Rm62      | Rm62, isoform J                                                              | 463.709 | 2 | 17.67 | 571805   | 17.72 | 448173  | 1.01817 |
| NTCVFGGAPK            | Rm62      | Rm62, isoform J                                                              | 525.755 | 2 | 19.91 | 235668   | 19.91 | 262752  | 1.44833 |
| SNILVATDVAAR          | Rm62      | Rm62, isoform J                                                              | 615.346 | 2 | 29.95 | 1490640  | 29.85 | 1916326 | 1.67001 |
| AAIELNR               | CG9492    | Uncharacterized protein, isoform F (EC 3.6.1.3) (EC 3.6.4.5)                 | 393.727 | 2 | 17.87 | 27934492 | 17.87 | 8147882 | 0.3789  |
| LSEASQAADER           | Tm1       | Tropomyosin 1, isoform Q                                                     | 696.816 | 2 | 11.57 | 343010   | 11.67 | 695696  | 2.63472 |
| AQCPIVER              | RpS5b     | Ribosomal protein S5b, isoform B                                             | 486.75  | 2 | 14.71 | 806831   | 14.72 | 445526  | 0.71732 |
| QAVDVSPLR             | RpS5b     | Ribosomal protein S5b, isoform B                                             | 492.777 | 2 | 23.02 | 630384   | 23.02 | 403036  | 0.83054 |
| ELAQQIQQVATEFGSSSYVR  | Rm62      | Rm62, isoform L                                                              | 747.71  | 3 | 48.34 | 417102   | 48.12 | 508191  | 1.58273 |
| FGGGGGFGDR            | Rm62      | Rm62, isoform L                                                              | 463.709 | 2 | 17.67 | 571805   | 17.72 | 448173  | 1.01817 |
| NTCVFGGAPK            | Rm62      | Rm62, isoform L                                                              | 525.755 | 2 | 19.91 | 235668   | 19.91 | 262752  | 1.44833 |
| SNILVATDVAAR          | Rm62      | Rm62, isoform L                                                              | 615.346 | 2 | 29.95 | 1490640  | 29.85 | 1916326 | 1.67001 |
| ELAQQIQQVATEFGSSSYVR  | Rm62      | Rm62, isoform M                                                              | 747.71  | 3 | 48.34 | 417102   | 48.12 | 508191  | 1.58273 |
| FGGGGGFGDR            | Rm62      | Rm62, isoform M                                                              | 463.709 | 2 | 17.67 | 571805   | 17.72 | 448173  | 1.01817 |
| NTCVFGGAPK            | Rm62      | Rm62, isoform M                                                              | 525.755 | 2 | 19.91 | 235668   | 19.91 | 262752  | 1.44833 |
| SNILVATDVAAR          | Rm62      | Rm62, isoform M                                                              | 615.346 | 2 | 29.95 | 1490640  | 29.85 | 1916326 | 1.67001 |
| ILFAFGPVVEPYTTEHTVVAK | alpha-Est | Carboxylic ester hydrolase (EC 3.1.1.-)                                      | 773.419 | 3 | 44.7  | 30930    | 48.23 | 75260   | 3.16087 |
| IADVYNASNNELVR        | RpS8      | 40S ribosomal protein S8                                                     | 838.934 | 2 | 31.29 | 2587695  | 31.12 | 2542053 | 1.27613 |
| IADVYNASNNELVR        | RpS8      | 40S ribosomal protein S8                                                     | 559.625 | 3 | 31.29 | 1034232  | 31.16 | 1022478 | 1.28428 |
| ILACISSRPGQCGR        | RpS8      | 40S ribosomal protein S8                                                     | 787.898 | 2 | 20.14 | 140708   | 20.13 | 87291   | 0.80588 |
| ILACISSRPGQCGR        | RpS8      | 40S ribosomal protein S8                                                     | 525.601 | 3 | 20.1  | 386803   | 20.05 | 432135  | 1.45128 |
| LETGNFAWASEGVAR       | RpS8      | 40S ribosomal protein S8                                                     | 804.394 | 2 | 35.85 | 1612600  | 35.66 | 1025388 | 0.82601 |
| NSIVVIDATPFR          | RpS8      | 40S ribosomal protein S8                                                     | 666.37  | 2 | 40.3  | 3907103  | 40.11 | 3186895 | 1.05958 |
| QWYEAHYVLP LGR        | RpS8      | 40S ribosomal protein S8                                                     | 544.616 | 3 | 39.06 | 708914   | 38.88 | 864527  | 1.58419 |
| SDGYILEGK             | RpS8      | 40S ribosomal protein S8                                                     | 491.248 | 2 | 21.95 | 526219   | 21.94 | 571255  | 1.41022 |
| VEQALDQFTSGR          | RpS8      | 40S ribosomal protein S8                                                     | 740.357 | 2 | 25.93 | 843576   | 25.86 | 462117  | 0.71162 |
| ELAQQIQQVATEFGSSSYVR  | Rm62      | Rm62, isoform K                                                              | 747.71  | 3 | 48.34 | 417102   | 48.12 | 508191  | 1.58273 |
| FGGGGGFGDR            | Rm62      | Rm62, isoform K                                                              | 463.709 | 2 | 17.67 | 571805   | 17.72 | 448173  | 1.01817 |
| NTCVFGGAPK            | Rm62      | Rm62, isoform K                                                              | 525.755 | 2 | 19.91 | 235668   | 19.91 | 262752  | 1.44833 |
| SNILVATDVAAR          | Rm62      | Rm62, isoform K                                                              | 615.346 | 2 | 29.95 | 1490640  | 29.85 | 1916326 | 1.67001 |
| SAFIQVLESSYR          | aralar1   | Aralar1, isoform E                                                           | 700.364 | 2 | 43.03 | 477153   | 42.8  | 602689  | 1.64081 |
| LSEASQAADER           | Tm1       | Tropomyosin 1, isoform P                                                     | 696.816 | 2 | 11.57 | 343010   | 11.67 | 695696  | 2.63472 |
| AALDCVELFATEQR        | Sin3A     | Sin3A, isoform G                                                             | 811.896 | 2 | 40.25 | 1722570  | 40.03 | 1260136 | 0.9503  |

|                             |           |                                                                              |         |   |       |          |       |         |         |
|-----------------------------|-----------|------------------------------------------------------------------------------|---------|---|-------|----------|-------|---------|---------|
| AALDCVELFATEQR              | Sin3A     | Sin3A, isoform G                                                             | 541.6   | 3 | 40.21 | 619337   | 39.99 | 590227  | 1.23798 |
| ANTADGANTVQIHVTGGGAANNPA    | Sin3A     | Sin3A, isoform G                                                             | 928.703 | 4 | 26.74 | 509613   | 26.67 | 542107  | 1.38187 |
| DVSFSEASSK                  | Sin3A     | Sin3A, isoform G                                                             | 528.746 | 2 | 17.44 | 1467180  | 17.41 | 381916  | 0.33815 |
| DYHAGLQQQAHR                | Sin3A     | Sin3A, isoform G                                                             | 517.919 | 3 | 11.22 | 2585659  | 11.33 | 2959684 | 1.48695 |
| DYHAGLQQQAHR                | Sin3A     | Sin3A, isoform G                                                             | 388.691 | 4 | 11.22 | 864204   | 11.33 | 948677  | 1.42602 |
| ESTATALR                    | Sin3A     | Sin3A, isoform G                                                             | 424.727 | 2 | 11.65 | 1476544  | 11.71 | 969884  | 0.85329 |
| FHLDDHLGGTSQTIHQR           | Sin3A     | Sin3A, isoform G                                                             | 654.657 | 3 | 23.08 | 1395287  | 23.06 | 756858  | 0.70465 |
| FHLDDHLGGTSQTIHQR           | Sin3A     | Sin3A, isoform G                                                             | 491.245 | 4 | 23.12 | 3523823  | 23.06 | 1769329 | 0.65225 |
| FLEILHDYQR                  | Sin3A     | Sin3A, isoform G                                                             | 445.235 | 3 | 35.73 | 2969216  | 35.43 | 0       | 0       |
| GTSHQSAAEVVDVLDSSCK         | Sin3A     | Sin3A, isoform G                                                             | 727.995 | 3 | 27.24 | 493988   | 27.08 | 189593  | 0.49857 |
| ILTPQHGGAAQTIAYLPSTTPTATNLK | Sin3A     | Sin3A, isoform G                                                             | 898.82  | 3 | 35.8  | 4998395  | 35.62 | 5283785 | 1.37321 |
| LANPALGGGNTGR               | Sin3A     | Sin3A, isoform G                                                             | 627.831 | 2 | 17.75 | 10453019 | 17.75 | 7732981 | 0.96101 |
| LGASYCALPQSTVPK             | Sin3A     | Sin3A, isoform G                                                             | 796.411 | 2 | 28.68 | 1479395  | 28.59 | 1263101 | 1.10911 |
| LHAILCDR                    | Sin3A     | Sin3A, isoform G                                                             | 499.266 | 2 | 19.41 | 1985761  | 19.38 | 633888  | 0.41468 |
| LLEEQR                      | Sin3A     | Sin3A, isoform G                                                             | 443.753 | 2 | 17.75 | 2718818  | 17.76 | 2609800 | 1.24695 |
| MLTEQEVYTVAK                | Sin3A     | Sin3A, isoform G                                                             | 778.387 | 2 | 27.81 | 3209047  | 27.77 | 3556038 | 1.4395  |
| NDILFEK                     | Sin3A     | Sin3A, isoform G                                                             | 439.735 | 2 | 27.05 | 2341755  | 27.01 | 1764770 | 0.97897 |
| NPFVAVPIVLK                 | Sin3A     | Sin3A, isoform G                                                             | 598.874 | 2 | 46.1  | 1222769  | 45.94 | 767794  | 0.81569 |
| QFVPDLFFAPR                 | Sin3A     | Sin3A, isoform G                                                             | 668.856 | 2 | 50.52 | 6756025  | 50.25 | 7385320 | 1.42004 |
| SAHAAAIGNLSAVNTSVSIK        | Sin3A     | Sin3A, isoform G                                                             | 956.018 | 2 | 31.61 | 170248   | 31.53 | 254171  | 1.9394  |
| SAHAAAIGNLSAVNTSVSIK        | Sin3A     | Sin3A, isoform G                                                             | 637.681 | 3 | 31.61 | 2399426  | 31.53 | 2575551 | 1.39439 |
| SHCIDTPGVIER                | Sin3A     | Sin3A, isoform G                                                             | 692.338 | 2 | 20.25 | 307279   | 20.24 | 237394  | 1.0036  |
| SHCIDTPGVIER                | Sin3A     | Sin3A, isoform G                                                             | 461.894 | 3 | 20.22 | 598355   | 20.24 | 340785  | 0.73985 |
| SSPGISYATPPLPSGPHGQHNSGS    | Sin3A     | Sin3A, isoform G                                                             | 887.432 | 3 | 25.86 | 488181   | 25.83 | 202251  | 0.53819 |
| TADQINASGWGSASK             | Sin3A     | Sin3A, isoform G                                                             | 746.855 | 2 | 22.49 | 436619   | 22.54 | 444931  | 1.32377 |
| TILDDAANLLIHHVK             | Sin3A     | Sin3A, isoform G                                                             | 418.99  | 4 | 49.12 | 1380604  | 49.31 | 716808  | 0.67446 |
| TISGTQTVATAVGNLATISQQQPQVQ  | Sin3A     | Sin3A, isoform G                                                             | 1041.89 | 3 | 45.65 | 3056186  | 45.35 | 3369934 | 1.4324  |
| TYNNNQQQNHVIGSGLNATR        | Sin3A     | Sin3A, isoform G                                                             | 786.383 | 3 | 19.45 | 600429   | 19.45 | 504776  | 1.09209 |
| VLENLQK                     | Sin3A     | Sin3A, isoform G                                                             | 422.25  | 2 | 16.41 | 3516505  | 16.41 | 2648950 | 0.97855 |
| VTIELLDSEPEEVDKPAALK        | Sin3A     | Sin3A, isoform G                                                             | 732.726 | 3 | 39.02 | 4118678  | 38.81 | 3130918 | 0.9875  |
| YAHFQTYVNK                  | Sin3A     | Sin3A, isoform G                                                             | 635.814 | 2 | 19.83 | 763160   | 19.77 | 541027  | 0.92093 |
| YAHFQTYVNK                  | Sin3A     | Sin3A, isoform G                                                             | 424.212 | 3 | 19.83 | 1837847  | 19.81 | 1859402 | 1.31428 |
| YVGHPANQNLTHGHNAK           | Sin3A     | Sin3A, isoform G                                                             | 619.975 | 3 | 10.09 | 210214   | 10.13 | 163530  | 1.01055 |
| AIYEQSR                     | hts       | Hu li tai shao, isoform Q (Hu li tai shao, isoform R)                        | 433.722 | 2 | 11.43 | 989317   | 11.54 | 662957  | 0.87051 |
| DATVSQLAGDHHVMMGAASK        | hts       | Hu li tai shao, isoform Q (Hu li tai shao, isoform R)                        | 636.293 | 3 | 17.09 | 884028   | 17.06 | 1039090 | 1.5269  |
| DGGAGASGILQQLSDIVGVPVSR     | hts       | Hu li tai shao, isoform Q (Hu li tai shao, isoform R)                        | 1098.58 | 2 | 60.31 | 1852831  | 60.03 | 1591019 | 1.11548 |
| DGGAGASGILQQLSDIVGVPVSR     | hts       | Hu li tai shao, isoform Q (Hu li tai shao, isoform R)                        | 732.725 | 3 | 60.31 | 7576074  | 60.03 | 5964562 | 1.02272 |
| FAAVAAEDGAATAEK             | hts       | Hu li tai shao, isoform Q (Hu li tai shao, isoform R)                        | 746.868 | 2 | 24.97 | 13124    | 25.1  | 319707  | 31.6452 |
| LLDLYGWTQQLGAQITAR          | hts       | Hu li tai shao, isoform Q (Hu li tai shao, isoform R)                        | 988.534 | 2 | 53.56 | 2279326  | 53.29 | 1565566 | 0.89225 |
| LLDLYGWTQQLGAQITAR          | hts       | Hu li tai shao, isoform Q (Hu li tai shao, isoform R)                        | 659.358 | 3 | 53.56 | 1975907  | 53.25 | 1298057 | 0.85339 |
| LLPVGLDNLVLIPEESR           | hts       | Hu li tai shao, isoform Q (Hu li tai shao, isoform R)                        | 626.363 | 3 | 55.71 | 938166   | 55.45 | 1069288 | 1.4806  |
| MLDNAGYR                    | hts       | Hu li tai shao, isoform Q (Hu li tai shao, isoform R)                        | 470.221 | 2 | 16.11 | 947899   | 16.1  | 1485204 | 2.03538 |
| NDVELPPAVSSGLYLEEEELFR      | hts       | Hu li tai shao, isoform Q (Hu li tai shao, isoform R)                        | 873.778 | 3 | 65.17 | 1366923  | 64.85 | 956167  | 0.90868 |
| SHFVLSVWHAARPDIR            | hts       | Hu li tai shao, isoform Q (Hu li tai shao, isoform R)                        | 486.02  | 4 | 24.42 | 11051    | 23.97 | 0       | 0       |
| SSNCMVPINDIR                | hts       | Hu li tai shao, isoform Q (Hu li tai shao, isoform R)                        | 711.329 | 2 | 24.43 | 633585   | 24.05 | 1332102 | 2.73121 |
| SVHGEYTDTFSESEAVLQAGTK      | hts       | Hu li tai shao, isoform Q (Hu li tai shao, isoform R)                        | 824.378 | 3 | 32.37 | 929683   | 32.29 | 1063232 | 1.48565 |
| TGLLPLTK                    | hts       | Hu li tai shao, isoform Q (Hu li tai shao, isoform R)                        | 421.771 | 2 | 32.52 | 2862087  | 32.37 | 2725569 | 1.23708 |
| TGYIYR                      | hts       | Hu li tai shao, isoform Q (Hu li tai shao, isoform R)                        | 386.703 | 2 | 16.34 | 1779020  | 16.29 | 796815  | 0.58183 |
| VEVLETGTPDPK                | hts       | Hu li tai shao, isoform Q (Hu li tai shao, isoform R)                        | 642.838 | 2 | 23.08 | 3487670  | 23.1  | 2329013 | 0.86748 |
| GATALGPATTSGASER            | PIP5K59E  | Phosphatidylinositol 4-phosphate 5-kinase at 59B, isoform F (EC 2.7.1.-) (EC | 723.863 | 2 | 16.98 | 232423   | 17.03 | 258407  | 1.44427 |
| VAPVEAVTISSNR               | mod       | Modulo, isoform C                                                            | 671.87  | 2 | 25.93 | 637081   | 25.91 | 601323  | 1.22613 |
| NFPALTYFR                   | I(2)01289 | Lethal (2) 01289, isoform M                                                  | 564.795 | 2 | 42.88 | 433584   | 42.79 | 472450  | 1.41548 |
| GATALGPATTSGASER            | PIP5K59E  | Phosphatidylinositol 4-phosphate 5-kinase at 59B, isoform H (EC 2.7.1.-) (EC | 723.863 | 2 | 16.98 | 232423   | 17.03 | 258407  | 1.44427 |

|                         |           |                                                                     |         |   |       |         |       |          |         |
|-------------------------|-----------|---------------------------------------------------------------------|---------|---|-------|---------|-------|----------|---------|
| NFPALTYFR               | I(2)01289 | Lethal (2) 01289, isoform L                                         | 564.795 | 2 | 42.88 | 433584  | 42.79 | 472450   | 1.41548 |
| AIYEQSR                 | hts       | Hu li tai shao, isoform O (Hu li tai shao, isoform S)               | 433.722 | 2 | 11.43 | 989317  | 11.54 | 662957   | 0.87051 |
| DATVSQLQGDHVVMMGAASK    | hts       | Hu li tai shao, isoform O (Hu li tai shao, isoform S)               | 636.293 | 3 | 17.09 | 884028  | 17.06 | 1039090  | 1.5269  |
| DGGAGASGILQQLSDIVGVVPSR | hts       | Hu li tai shao, isoform O (Hu li tai shao, isoform S)               | 1098.58 | 2 | 60.31 | 1852831 | 60.03 | 1591019  | 1.11548 |
| DGGAGASGILQQLSDIVGVVPSR | hts       | Hu li tai shao, isoform O (Hu li tai shao, isoform S)               | 732.725 | 3 | 60.31 | 7576074 | 60.03 | 5964562  | 1.02272 |
| FAAVAAAEDGAATAEK        | hts       | Hu li tai shao, isoform O (Hu li tai shao, isoform S)               | 746.868 | 2 | 24.97 | 13124   | 25.1  | 319707   | 31.6452 |
| LLDLYGWTQQLGAQITAR      | hts       | Hu li tai shao, isoform O (Hu li tai shao, isoform S)               | 988.534 | 2 | 53.56 | 2279326 | 53.29 | 1565566  | 0.89225 |
| LLDLYGWTQQLGAQITAR      | hts       | Hu li tai shao, isoform O (Hu li tai shao, isoform S)               | 659.358 | 3 | 53.56 | 1975907 | 53.25 | 1298057  | 0.85339 |
| LLPVGLDNLVLIPEESR       | hts       | Hu li tai shao, isoform O (Hu li tai shao, isoform S)               | 626.363 | 3 | 55.71 | 938166  | 55.45 | 1069288  | 1.4806  |
| MLDNAGYR                | hts       | Hu li tai shao, isoform O (Hu li tai shao, isoform S)               | 470.221 | 2 | 16.11 | 947899  | 16.1  | 1485204  | 2.03538 |
| NDVELPPAVSSLGYLLEEEELFR | hts       | Hu li tai shao, isoform O (Hu li tai shao, isoform S)               | 873.778 | 3 | 65.17 | 1366923 | 64.85 | 956167   | 0.90868 |
| SHFVLHSHVHAARPDIR       | hts       | Hu li tai shao, isoform O (Hu li tai shao, isoform S)               | 486.02  | 4 | 24.42 | 11051   | 23.97 | 0        | 0       |
| SSNKMVPINDIR            | hts       | Hu li tai shao, isoform O (Hu li tai shao, isoform S)               | 711.329 | 2 | 24.43 | 633585  | 24.05 | 1332102  | 2.73121 |
| SVHGEYTDTFSESEAVLQAGTK  | hts       | Hu li tai shao, isoform O (Hu li tai shao, isoform S)               | 824.378 | 3 | 32.37 | 929683  | 32.29 | 1063232  | 1.48565 |
| TGLLPLTK                | hts       | Hu li tai shao, isoform O (Hu li tai shao, isoform S)               | 421.771 | 2 | 32.52 | 2862087 | 32.37 | 2725569  | 3.23708 |
| TGYIYR                  | hts       | Hu li tai shao, isoform O (Hu li tai shao, isoform S)               | 386.703 | 2 | 16.34 | 1779020 | 16.29 | 796815   | 0.58183 |
| VEVLETGTPDPK            | hts       | Hu li tai shao, isoform O (Hu li tai shao, isoform S)               | 642.838 | 2 | 23.08 | 3487670 | 23.1  | 2329013  | 0.86748 |
| FLYTLVVQDK              | Rpl38     | GEO09618p1 (Ribosomal protein L38, isoform B)                       | 613.345 | 2 | 38.8  | 2657415 | 38.5  | 2241895  | 1.09592 |
| SVLTGVLSNEER            | 14-3-3zet | 14-3-3zeta, isoform K (14-3-3zeta, isoform L)                       | 775.371 | 2 | 21.6  | 716717  | 21.65 | 1301291  | 2.35857 |
| YLAEVATGDAR             | 14-3-3zet | 14-3-3zeta, isoform K (14-3-3zeta, isoform L)                       | 583.296 | 2 | 20.89 | 1053151 | 20.85 | 1412304  | 1.74205 |
| SAGLTPDLSNFTETR         | sbb       | Scribbler, isoform J                                                | 804.897 | 2 | 36.67 | 741872  | 36.56 | 971672   | 1.70143 |
| TSPGFSGVGVGAASSK        | sbb       | Scribbler, isoform J                                                | 704.857 | 2 | 24.77 | 1117813 | 24.76 | 1320748  | 1.53488 |
| ASPSLYGTAER             | jbug      | Jitterbug, isoform M                                                | 576.288 | 2 | 18.78 | 139955  | 18.74 | 220071   | 2.04266 |
| ASPSLYGTAER             | jbug      | Jitterbug, isoform N                                                | 576.288 | 2 | 18.78 | 139955  | 18.74 | 220071   | 2.04266 |
| TVIIPSDVQVVSTK          | CG16779   | Uncharacterized protein, isoform D                                  | 743.43  | 2 | 34.9  | 984275  | 34.74 | 541335   | 0.71445 |
| TVIIPSDVQVVSTK          | CG16779   | Uncharacterized protein, isoform C                                  | 743.43  | 2 | 34.9  | 984275  | 34.74 | 541335   | 0.71445 |
| LQNLEDTNAGLNAR          | LamC      | Lamin C, isoform B                                                  | 764.889 | 2 | 23.51 | 123071  | 23.45 | 281522   | 2.97152 |
| DAVITYTEHAK             | His4r     | Histone H4                                                          | 567.775 | 2 | 11.73 | 1744246 | 11.83 | 635649   | 0.4734  |
| DNIQGITKPAIR            | His4r     | Histone H4                                                          | 442.589 | 3 | 22.72 | 3459819 | 22.72 | 2375618  | 0.89196 |
| ISGLIYEETR              | His4r     | Histone H4                                                          | 590.814 | 2 | 28.26 | 8240435 | 28.2  | 5262581  | 0.8296  |
| VLENVIR                 | His4r     | Histone H4                                                          | 495.293 | 2 | 37.01 | 7324526 | 36.84 | 3166374  | 0.56157 |
| LSEASQAADER             | Tm1       | Tropomyosin 1, isoform S                                            | 696.816 | 2 | 11.57 | 343010  | 11.67 | 695696   | 2.63472 |
| ASQELGLR                | HtrA2     | HTRA2-related serine protease, isoform B (EC 3.4.-.-) (EC 3.4.21.-) | 437.243 | 2 | 17.76 | 957616  | 17.79 | 498328   | 0.676   |
| TFPATIEDVDQTSDLATLR     | HtrA2     | HTRA2-related serine protease, isoform B (EC 3.4.-.-) (EC 3.4.21.-) | 1047.02 | 2 | 42.81 | 1456762 | 42.55 | 805342   | 0.71815 |
| TLDIVILR                | HtrA2     | HTRA2-related serine protease, isoform B (EC 3.4.-.-) (EC 3.4.21.-) | 471.803 | 2 | 41.14 | 1392585 | 40.98 | 994282   | 0.92749 |
| VTAGISFAIPIDYVK         | HtrA2     | HTRA2-related serine protease, isoform B (EC 3.4.-.-) (EC 3.4.21.-) | 797.448 | 2 | 50.05 | 817270  | 49.8  | 294920   | 0.46877 |
| AGSEPYVPPPSYWNR         | Mf        | Myofilin, isoform O                                                 | 860.41  | 2 | 33.23 | 748487  | 33.06 | 1566838  | 2.71933 |
| AIYDHHYSR               | Mf        | Myofilin, isoform O                                                 | 581.275 | 2 | 11.31 | 475566  | 11.41 | 651391   | 1.77932 |
| AIYDHHYSR               | Mf        | Myofilin, isoform O                                                 | 387.853 | 3 | 11.31 | 2895978 | 11.41 | 4746762  | 2.12924 |
| ASRPYSSYLDSPSYR         | Mf        | Myofilin, isoform O                                                 | 874.916 | 2 | 25.08 | 1194562 | 25.03 | 1397150  | 1.51935 |
| ASRPYSSYLDSPSYR         | Mf        | Myofilin, isoform O                                                 | 583.613 | 3 | 25.12 | 5487893 | 25.03 | 8501748  | 2.01245 |
| ASSLEPLDELFER           | Mf        | Myofilin, isoform O                                                 | 753.378 | 2 | 48.45 | 4498040 | 48.19 | 5102070  | 1.47348 |
| DKPLTPNSLVPLEYEPEDK     | Mf        | Myofilin, isoform O                                                 | 728.707 | 3 | 38.98 | 567161  | 38.81 | 728559   | 1.66871 |
| DSYLSPVK                | Mf        | Myofilin, isoform O                                                 | 454.74  | 2 | 22.04 | 1523720 | 22.02 | 1430945  | 1.21994 |
| DTYGYSPR                | Mf        | Myofilin, isoform O                                                 | 479.717 | 2 | 14.86 | 2640775 | 14.83 | 2840777  | 1.39742 |
| FWQSYIR                 | Mf        | Myofilin, isoform O                                                 | 500.256 | 2 | 32.37 | 739255  | 32.25 | 1687659  | 2.9656  |
| GGPSVFDNR               | Mf        | Myofilin, isoform O                                                 | 417.709 | 2 | 19.86 | 5727839 | 19.85 | 7157511  | 1.62328 |
| LLAELNK                 | Mf        | Myofilin, isoform O                                                 | 400.747 | 2 | 22.38 | 846200  | 22.35 | 1253332  | 1.92405 |
| LPIFHPR                 | Mf        | Myofilin, isoform O                                                 | 440.264 | 2 | 24.47 | 512417  | 24.48 | 315832   | 0.80067 |
| NHLEMIGR                | Mf        | Myofilin, isoform O                                                 | 493.248 | 2 | 12.87 | 1554021 | 12.91 | 1080925  | 0.90357 |
| SASPFRRPAR              | Mf        | Myofilin, isoform O                                                 | 494.77  | 2 | 13.46 | 1272464 | 13.42 | 1443660  | 1.47381 |
| SIYDEPATANER            | Mf        | Myofilin, isoform O                                                 | 683.318 | 2 | 18.42 | 9216683 | 18.42 | 15046478 | 2.12072 |
| YGLYLRL                 | Mf        | Myofilin, isoform O                                                 | 392.721 | 2 | 28.26 | 5499678 | 28.16 | 8903475  | 2.10303 |

|                            |           |                                                    |         |   |       |          |       |          |         |
|----------------------------|-----------|----------------------------------------------------|---------|---|-------|----------|-------|----------|---------|
| LSEASQAADER                | Tm1       | Tropomyosin 1, isoform R                           | 696.816 | 2 | 11.57 | 343010   | 11.67 | 695696   | 2.63472 |
| DITLFHAMNHLK               | MTA1-like | Metastasis associated 1-like, isoform D            | 518.282 | 3 | 43.88 | 2053379  | 43.78 | 955106   | 0.60423 |
| DLPNPLVQLADK               | MTA1-like | Metastasis associated 1-like, isoform D            | 661.869 | 2 | 44.73 | 4867516  | 44.55 | 2835007  | 0.7566  |
| ELTIPTQATSTIR              | MTA1-like | Metastasis associated 1-like, isoform D            | 772.438 | 2 | 37.83 | 11123584 | 37.63 | 12065403 | 1.40903 |
| HYAQAHGIAISSGSPRPIMK       | MTA1-like | Metastasis associated 1-like, isoform D            | 531.031 | 4 | 22.34 | 2400440  | 22.14 | 3061997  | 1.65705 |
| HYAQAHGIAISSGSPRPIMK       | MTA1-like | Metastasis associated 1-like, isoform D            | 713.037 | 3 | 18.86 | 1475021  | 18.76 | 1372104  | 1.2084  |
| HYAQAHGIAISSGSPRPIMK       | MTA1-like | Metastasis associated 1-like, isoform D            | 535.03  | 4 | 18.86 | 8277828  | 18.73 | 11433715 | 1.79429 |
| IDQLFVVS                   | MTA1-like | Metastasis associated 1-like, isoform D            | 538.809 | 2 | 33.15 | 2031489  | 33.09 | 2200379  | 1.40704 |
| ILSAVDLR                   | MTA1-like | Metastasis associated 1-like, isoform D            | 443.771 | 2 | 29.06 | 3480815  | 28.94 | 3278001  | 1.22335 |
| LCLSCWEYWR                 | MTA1-like | Metastasis associated 1-like, isoform D            | 736.826 | 2 | 45.03 | 1100791  | 44.85 | 1003854  | 1.18464 |
| LGAPGSGPHEWLVLTPK          | MTA1-like | Metastasis associated 1-like, isoform D            | 586.989 | 3 | 38.45 | 4162383  | 38.27 | 5011628  | 1.56408 |
| LLLLPK                     | MTA1-like | Metastasis associated 1-like, isoform D            | 412.802 | 2 | 25.48 | 7404797  | 25.43 | 7870932  | 1.38081 |
| QIIEYYMWK                  | MTA1-like | Metastasis associated 1-like, isoform D            | 718.85  | 2 | 43.1  | 621851   | 42.87 | 464183   | 0.96967 |
| QPSLHMSAAAASR              | MTA1-like | Metastasis associated 1-like, isoform D            | 448.223 | 3 | 11.24 | 631709   | 11.36 | 455066   | 0.93579 |
| QSAYAINAMLVK               | MTA1-like | Metastasis associated 1-like, isoform D            | 654.853 | 2 | 35.58 | 1490566  | 35.41 | 2100155  | 1.8303  |
| QSAYAINAMLVK               | MTA1-like | Metastasis associated 1-like, isoform D            | 662.85  | 2 | 29.32 | 5849027  | 29.21 | 6763609  | 1.50216 |
| QVESIPATQIR                | MTA1-like | Metastasis associated 1-like, isoform D            | 621.346 | 2 | 23.95 | 29583954 | 23.96 | 39601180 | 1.7389  |
| SIGTFAR                    | MTA1-like | Metastasis associated 1-like, isoform D            | 376.208 | 2 | 18.93 | 21987752 | 18.88 | 27082934 | 1.60006 |
| SSQWNSVSSGHSTSR            | MTA1-like | Metastasis associated 1-like, isoform D            | 536.245 | 3 | 13.07 | 1701975  | 13.07 | 2157652  | 1.64684 |
| SSSAASTPTATLAGLATTPTAVVDLI | MTA1-like | Metastasis associated 1-like, isoform D            | 968.816 | 3 | 46.62 | 1694407  | 46.37 | 1458500  | 1.11818 |
| TAFYLHTNPMTR               | MTA1-like | Metastasis associated 1-like, isoform D            | 726.359 | 2 | 28.65 | 3357775  | 28.53 | 4332503  | 1.67614 |
| TAFYLHTNPMTR               | MTA1-like | Metastasis associated 1-like, isoform D            | 484.575 | 3 | 28.65 | 6289877  | 28.53 | 6959267  | 1.43729 |
| TAFYLHTNPMTR               | MTA1-like | Metastasis associated 1-like, isoform D            | 734.356 | 2 | 22.69 | 3508484  | 22.72 | 3475736  | 1.28691 |
| TAFYLHTNPMTR               | MTA1-like | Metastasis associated 1-like, isoform D            | 489.906 | 3 | 22.69 | 11884596 | 22.72 | 15231011 | 1.66482 |
| TPVSEEQAQAVLDPSIAALDEER    | MTA1-like | Metastasis associated 1-like, isoform D            | 847.089 | 3 | 45.9  | 2579368  | 45.66 | 1415875  | 0.71307 |
| VGDYVYVETTPNSPYLIR         | MTA1-like | Metastasis associated 1-like, isoform D            | 1043.53 | 2 | 39.99 | 19490416 | 39.8  | 21930646 | 1.46168 |
| VGDYVYVETTPNSPYLIR         | MTA1-like | Metastasis associated 1-like, isoform D            | 696.021 | 3 | 39.99 | 8430076  | 39.8  | 9468280  | 1.45902 |
| VMCFYR                     | MTA1-like | Metastasis associated 1-like, isoform D            | 446.196 | 2 | 18.26 | 2536584  | 18.3  | 3037729  | 1.55569 |
| YQCDIPAK                   | MTA1-like | Metastasis associated 1-like, isoform D            | 497.737 | 2 | 14.9  | 10434692 | 14.9  | 5215218  | 0.64925 |
| AAVSGAVEQATLR              | P5cr-2    | Pyrroline-5-carboxylate reductase (EC 1.5.1.2)     | 636.849 | 2 | 23.08 | 549773   | 23.1  | 334382   | 0.7901  |
| IVIGAQPNDPWISEITDALLTSNYR  | Stat92E   | Signal transducer and activator of transcription   | 900.48  | 3 | 61.16 | 88166    | 60.86 | 149631   | 2.20467 |
| SLTIDNLDLYEK               | Stat92E   | Signal transducer and activator of transcription   | 785.904 | 2 | 48.67 | 137787   | 48.23 | 187413   | 1.76691 |
| GYAFVFTNR                  | Syp       | Syncrip, isoform N (Syncrip, isoform P)            | 588.296 | 2 | 35.44 | 514118   | 35.33 | 604713   | 1.52795 |
| EVSGDASEAALLK              | Atpalpha  | Sodium/potassium-transporting ATPase subunit alpha | 645.333 | 2 | 25.45 | 660865   | 25.35 | 279051   | 0.54852 |
| IATLCNR                    | Atpalpha  | Sodium/potassium-transporting ATPase subunit alpha | 424.226 | 2 | 14.34 | 183981   | 14.32 | 209877   | 1.48188 |
| LIIVEGCQR                  | Atpalpha  | Sodium/potassium-transporting ATPase subunit alpha | 544.3   | 2 | 24.31 | 677846   | 24.36 | 746923   | 1.43142 |
| LNIPVSEVNPR                | Atpalpha  | Sodium/potassium-transporting ATPase subunit alpha | 619.349 | 2 | 30.64 | 1527141  | 30.51 | 1174989  | 0.99949 |
| NLAFFSTNAVEGTAK            | Atpalpha  | Sodium/potassium-transporting ATPase subunit alpha | 785.399 | 2 | 38.55 | 1771624  | 38.01 | 15711079 | 11.5201 |
| YHTEIVFAR                  | Atpalpha  | Sodium/potassium-transporting ATPase subunit alpha | 568.298 | 2 | 25.19 | 792742   | 25.03 | 558537   | 0.91526 |
| YHTEIVFAR                  | Atpalpha  | Sodium/potassium-transporting ATPase subunit alpha | 379.201 | 3 | 25.23 | 368207   | 25.07 | 375193   | 1.32369 |
| IVIGAQPNDPWISEITDALLTSNYR  | Stat92E   | Signal transducer and activator of transcription   | 900.48  | 3 | 61.16 | 88166    | 60.86 | 149631   | 2.20467 |
| SLTIDNLDLYEK               | Stat92E   | Signal transducer and activator of transcription   | 785.904 | 2 | 48.67 | 137787   | 48.23 | 187413   | 1.76691 |
| GYAFVFTNR                  | Syp       | Syncrip, isoform M                                 | 588.296 | 2 | 35.44 | 514118   | 35.33 | 604713   | 1.52795 |
| GYAFVFTNR                  | Syp       | Syncrip, isoform R                                 | 588.296 | 2 | 35.44 | 514118   | 35.33 | 604713   | 1.52795 |
| HVINFDLPDVEEYVHR           | bel       | Belle, isoform B (EC 3.6.1.3)                      | 690.341 | 3 | 42.33 | 52327    | 42.25 | 363307   | 9.01925 |
| SGDCPILVATAVAAR            | bel       | Belle, isoform B (EC 3.6.1.3)                      | 750.896 | 2 | 37.72 | 71006    | 37.48 | 451861   | 8.2667  |
| ACHDSGEELDDISLPK           | MBD-like  | Methyl-CpG binding domain protein-like, isoform C  | 893.402 | 2 | 30.72 | 859129   | 30.56 | 663495   | 1.00323 |
| ACHDSGEELDDISLPK           | MBD-like  | Methyl-CpG binding domain protein-like, isoform C  | 595.937 | 3 | 30.68 | 4227121  | 30.52 | 3334801  | 1.02482 |
| TDVSLVPPIR                 | MBD-like  | Methyl-CpG binding domain protein-like, isoform C  | 548.822 | 2 | 35.16 | 14387869 | 35.02 | 9195601  | 0.83024 |
| TVGPNVNEQTVLQSVATALHMLNA   | MBD-like  | Methyl-CpG binding domain protein-like, isoform C  | 847.937 | 4 | 61.34 | 1644970  | 61.29 | 1228563  | 0.9702  |
| TVGPNVNEQTVLQSVATALHMLNA   | MBD-like  | Methyl-CpG binding domain protein-like, isoform C  | 851.936 | 4 | 55.74 | 1113659  | 55.85 | 795373   | 0.92777 |
| IVIGAQPNDPWISEITDALLTSNYR  | Stat92E   | Signal transducer and activator of transcription   | 900.48  | 3 | 61.16 | 88166    | 60.86 | 149631   | 2.20467 |
| SLTIDNLDLYEK               | Stat92E   | Signal transducer and activator of transcription   | 785.904 | 2 | 48.67 | 137787   | 48.23 | 187413   | 1.76691 |

|                             |         |                                                                                |         |   |       |          |       |           |         |
|-----------------------------|---------|--------------------------------------------------------------------------------|---------|---|-------|----------|-------|-----------|---------|
| GYAFVFTFNR                  | Syp     | Syncrip, isoform I                                                             | 588.296 | 2 | 35.44 | 514118   | 35.33 | 604713    | 1.52795 |
| GYAFVFTFNR                  | Syp     | Syncrip, isoform O                                                             | 588.296 | 2 | 35.44 | 514118   | 35.33 | 604713    | 1.52795 |
| AGLQFPVGR                   | His2Av  | Histone H2A                                                                    | 472.769 | 2 | 31.56 | 98633592 | 31.42 | 106838928 | 1.40711 |
| ATIAGGGVIPHIHK              | His2Av  | Histone H2A                                                                    | 685.899 | 2 | 24.2  | 4969387  | 24.16 | 4711632   | 1.23166 |
| ATIAGGGVIPHIHK              | His2Av  | Histone H2A                                                                    | 457.602 | 3 | 24.23 | 19229148 | 24.16 | 22945442  | 1.5501  |
| GDEELDSLK                   | His2Av  | Histone H2A                                                                    | 559.782 | 2 | 33.01 | 2609860  | 32.91 | 1105949   | 0.55048 |
| GNVILSQAY                   | His2Av  | Histone H2A                                                                    | 482.759 | 2 | 31.72 | 3533263  | 31.6  | 3759713   | 1.3823  |
| HLQLAIR                     | His2Av  | Histone H2A                                                                    | 425.767 | 2 | 22.72 | 21451580 | 22.66 | 9817742   | 0.59453 |
| VGATAAVYSAAILEYLTAEVLELAGM  | His2Av  | Histone H2A                                                                    | 965.85  | 3 | 65.73 | 7579277  | 65.74 | 7007764   | 1.20109 |
| VGATAAVYSAAILEYLTAEVLELAGM  | His2Av  | Histone H2A                                                                    | 724.639 | 4 | 65.73 | 1991616  | 65.74 | 2155629   | 1.40602 |
| ISGNHLTEIPDDAFTGLER         | chp     | Chaoptin, isoform C                                                            | 695.68  | 3 | 38.69 | 287292   | 38.5  | 281624    | 1.27341 |
| LLLDNILSEIPYDALGPLK         | chp     | Chaoptin, isoform C                                                            | 1099.62 | 2 | 62.1  | 575340   | 61.86 | 486645    | 1.09878 |
| LLLDNILSEIPYDALGPLK         | chp     | Chaoptin, isoform C                                                            | 733.415 | 3 | 62.05 | 449702   | 61.83 | 498658    | 1.44046 |
| GYAFVFTFNR                  | Syp     | Syncrip, isoform K                                                             | 588.296 | 2 | 35.44 | 514118   | 35.33 | 604713    | 1.52795 |
| STFTVDITPLILAAHR            | trp     | Transient receptor potential, isoform B                                        | 585.665 | 3 | 49.88 | 352438   | 49.67 | 830498    | 3.0611  |
| GYAFVFTFNR                  | Syp     | Syncrip, isoform Q                                                             | 588.296 | 2 | 35.44 | 514118   | 35.33 | 604713    | 1.52795 |
| LLTATESEVATQNR              | Tm2     | Tropomyosin 2, isoform E (Tropomyosin 2, isoform F) (Tropomyosin 2, isoform F) | 766.899 | 2 | 21.98 | 140941   | 22.02 | 442612    | 4.07951 |
| ISGNHLTEIPDDAFTGLER         | chp     | Chaoptin, isoform F                                                            | 695.68  | 3 | 38.69 | 287292   | 38.5  | 281624    | 1.27341 |
| LLLDNILSEIPYDALGPLK         | chp     | Chaoptin, isoform F                                                            | 1099.62 | 2 | 62.1  | 575340   | 61.86 | 486645    | 1.09878 |
| LLLDNILSEIPYDALGPLK         | chp     | Chaoptin, isoform F                                                            | 733.415 | 3 | 62.05 | 449702   | 61.83 | 498658    | 1.44046 |
| VQVGHAPSPNLK                | tau     | Microtubule-associated protein                                                 | 416.235 | 3 | 17.44 | 993769   | 17.41 | 1404801   | 1.83633 |
| SLTIDNLDFLYEK               | Stat92E | Signal transducer and activator of transcription                               | 785.904 | 2 | 48.67 | 137787   | 48.23 | 187413    | 1.76691 |
| SLTIDNLDFLYEK               | Stat92E | Signal transducer and activator of transcription                               | 785.904 | 2 | 48.67 | 137787   | 48.23 | 187413    | 1.76691 |
| GYAFVFTFNR                  | Syp     | Syncrip, isoform J                                                             | 588.296 | 2 | 35.44 | 514118   | 35.33 | 604713    | 1.52795 |
| SAFIQVLESSYR                | aralar1 | Aralar1, isoform F                                                             | 700.364 | 2 | 43.03 | 477153   | 42.8  | 602689    | 1.64081 |
| ISGNHLTEIPDDAFTGLER         | chp     | Chaoptin, isoform D                                                            | 695.68  | 3 | 38.69 | 287292   | 38.5  | 281624    | 1.27341 |
| LLLDNILSEIPYDALGPLK         | chp     | Chaoptin, isoform D                                                            | 1099.62 | 2 | 62.1  | 575340   | 61.86 | 486645    | 1.09878 |
| LLLDNILSEIPYDALGPLK         | chp     | Chaoptin, isoform D                                                            | 733.415 | 3 | 62.05 | 449702   | 61.83 | 498658    | 1.44046 |
| ISGNHLTEIPDDAFTGLER         | chp     | Chaoptin, isoform E                                                            | 695.68  | 3 | 38.69 | 287292   | 38.5  | 281624    | 1.27341 |
| LLLDNILSEIPYDALGPLK         | chp     | Chaoptin, isoform E                                                            | 1099.62 | 2 | 62.1  | 575340   | 61.86 | 486645    | 1.09878 |
| LLLDNILSEIPYDALGPLK         | chp     | Chaoptin, isoform E                                                            | 733.415 | 3 | 62.05 | 449702   | 61.83 | 498658    | 1.44046 |
| VQVGHAPSPNLK                | tau     | Microtubule-associated protein                                                 | 416.235 | 3 | 17.44 | 993769   | 17.41 | 1404801   | 1.83633 |
| RPATSGTGSVASSTAR            | Map205  | Microtubule-associated protein 205, isoform C                                  | 753.387 | 2 | 9.41  | 74073    | 9.52  | 32583     | 0.57142 |
| EVDGSGTIASSTNR              | CG8635  | Uncharacterized protein, isoform B                                             | 653.815 | 2 | 13.51 | 1132231  | 13.47 | 535526    | 0.61442 |
| FFLEAVEK                    | CG8635  | Uncharacterized protein, isoform B                                             | 491.766 | 2 | 36.01 | 903927   | 35.86 | 657062    | 0.94427 |
| FIQQVQK                     | CG8635  | Uncharacterized protein, isoform B                                             | 445.758 | 2 | 14.57 | 1436865  | 14.52 | 689451    | 0.62332 |
| LLDQATEAAK                  | CG8635  | Uncharacterized protein, isoform B                                             | 530.288 | 2 | 17.48 | 1942370  | 17.48 | 2050056   | 1.37106 |
| VTLESFLAWK                  | CG8635  | Uncharacterized protein, isoform B                                             | 597.332 | 2 | 50.62 | 626652   | 50.28 | 644776    | 1.33661 |
| EAVGAFIVFDVTR               | Rab32   | Rab32, isoform H (Rab32, isoform J)                                            | 712.383 | 2 | 49.81 | 1401007  | 49.56 | 1390509   | 1.28931 |
| AALDCVELFATEQR              | Sin3A   | Sin3A, isoform H                                                               | 811.896 | 2 | 40.25 | 1722570  | 40.03 | 1260136   | 0.9503  |
| AALDCVELFATEQR              | Sin3A   | Sin3A, isoform H                                                               | 541.6   | 3 | 40.21 | 619337   | 39.99 | 590227    | 1.23798 |
| ANTADGANTVQIHVTGGGAANNPA    | Sin3A   | Sin3A, isoform H                                                               | 928.703 | 4 | 26.74 | 509613   | 26.67 | 542107    | 1.38187 |
| DVSFSEASSK                  | Sin3A   | Sin3A, isoform H                                                               | 528.746 | 2 | 17.44 | 1467180  | 17.41 | 381916    | 0.33815 |
| DYHAGLQQQAHR                | Sin3A   | Sin3A, isoform H                                                               | 517.919 | 3 | 11.22 | 2585659  | 11.33 | 2959684   | 1.48695 |
| DYHAGLQQQAHR                | Sin3A   | Sin3A, isoform H                                                               | 388.691 | 4 | 11.22 | 864204   | 11.33 | 948677    | 1.42602 |
| ESTATALR                    | Sin3A   | Sin3A, isoform H                                                               | 424.727 | 2 | 11.65 | 1476544  | 11.71 | 969884    | 0.85329 |
| FHLDDHLGGTSQTIHQ            | Sin3A   | Sin3A, isoform H                                                               | 654.657 | 3 | 23.08 | 1395287  | 23.06 | 756858    | 0.70465 |
| FHLDDHLGGTSQTIHQ            | Sin3A   | Sin3A, isoform H                                                               | 491.245 | 4 | 23.12 | 3523823  | 23.06 | 1769329   | 0.65225 |
| FLEILHDYQR                  | Sin3A   | Sin3A, isoform H                                                               | 445.235 | 3 | 35.73 | 2969216  | 35.43 | 0         | 0       |
| GTSHQSAEYVQDVLSSCK          | Sin3A   | Sin3A, isoform H                                                               | 727.995 | 3 | 27.24 | 493988   | 27.08 | 189593    | 0.49857 |
| ILTPQHGGAAQTIAYLPSTTPTATNLK | Sin3A   | Sin3A, isoform H                                                               | 898.82  | 3 | 35.8  | 4998395  | 35.62 | 5283785   | 1.37321 |
| LANPALGGGGNTGR              | Sin3A   | Sin3A, isoform H                                                               | 627.831 | 2 | 17.75 | 10453019 | 17.75 | 7732981   | 0.96101 |
| LGASYCALPQSTVPK             | Sin3A   | Sin3A, isoform H                                                               | 796.411 | 2 | 28.68 | 1479395  | 28.59 | 1263101   | 1.10911 |



|                             |       |                                               |         |   |       |          |       |         |         |
|-----------------------------|-------|-----------------------------------------------|---------|---|-------|----------|-------|---------|---------|
| LHAILCDR                    | Sin3A | Sin3A, isoform H                              | 499.266 | 2 | 19.41 | 1985761  | 19.38 | 633888  | 0.41468 |
| LLEEQVR                     | Sin3A | Sin3A, isoform H                              | 443.753 | 2 | 17.75 | 2718818  | 17.76 | 2609800 | 1.24695 |
| MLTEQEVYTQVAK               | Sin3A | Sin3A, isoform H                              | 778.387 | 2 | 27.81 | 3209047  | 27.77 | 3556038 | 1.4395  |
| NDILFEK                     | Sin3A | Sin3A, isoform H                              | 439.735 | 2 | 27.05 | 2341755  | 27.01 | 1764770 | 0.97897 |
| NPFVAVPIVLK                 | Sin3A | Sin3A, isoform H                              | 598.874 | 2 | 46.1  | 1222769  | 45.94 | 767794  | 0.81569 |
| QFVPDLFFAPR                 | Sin3A | Sin3A, isoform H                              | 668.856 | 2 | 50.52 | 6756025  | 50.25 | 7385320 | 1.42004 |
| SAHAAAIGNLSAVNTSVSIK        | Sin3A | Sin3A, isoform H                              | 956.018 | 2 | 31.61 | 170248   | 31.53 | 254171  | 1.9394  |
| SAHAAAIGNLSAVNTSVSIK        | Sin3A | Sin3A, isoform H                              | 637.681 | 3 | 31.61 | 2399426  | 31.53 | 2575551 | 1.39439 |
| SHCIDTPGVIER                | Sin3A | Sin3A, isoform H                              | 692.338 | 2 | 20.25 | 307279   | 20.24 | 237394  | 1.0036  |
| SHCIDTPGVIER                | Sin3A | Sin3A, isoform H                              | 461.894 | 3 | 20.22 | 598355   | 20.24 | 340785  | 0.73985 |
| SSPGISYATPPLPSGPHGQHNSGS    | Sin3A | Sin3A, isoform H                              | 887.432 | 3 | 25.86 | 488181   | 25.83 | 202251  | 0.53819 |
| TADQINASGWGSASK             | Sin3A | Sin3A, isoform H                              | 746.855 | 2 | 22.49 | 436619   | 22.54 | 444931  | 1.32377 |
| TILDDAANLLIHHVK             | Sin3A | Sin3A, isoform H                              | 418.99  | 4 | 49.12 | 1380604  | 49.31 | 716808  | 0.67446 |
| TISGTQTVATAVGNLATISQQQPQVQ  | Sin3A | Sin3A, isoform H                              | 1041.89 | 3 | 45.65 | 3056186  | 45.35 | 3369934 | 1.4324  |
| TYNNNQQQQNHVIGSGLNATR       | Sin3A | Sin3A, isoform H                              | 786.383 | 3 | 19.45 | 600429   | 19.45 | 504776  | 1.09209 |
| VLENLQK                     | Sin3A | Sin3A, isoform H                              | 422.25  | 2 | 16.41 | 3516505  | 16.41 | 2648950 | 0.97855 |
| VTIELLDSEPEEVDKPAALK        | Sin3A | Sin3A, isoform H                              | 732.726 | 3 | 39.02 | 4118678  | 38.81 | 3130918 | 0.9875  |
| YAHFQTYVNK                  | Sin3A | Sin3A, isoform H                              | 635.814 | 2 | 19.83 | 763160   | 19.77 | 541027  | 0.92093 |
| YAHFQTYVNK                  | Sin3A | Sin3A, isoform H                              | 424.212 | 3 | 19.83 | 1837847  | 19.81 | 1859402 | 1.31428 |
| YVGHPNQNLTGHNAK             | Sin3A | Sin3A, isoform H                              | 619.975 | 3 | 10.09 | 210214   | 10.13 | 163530  | 1.01055 |
| AALDCVELFATEQR              | Sin3A | Sin3A, isoform I                              | 811.896 | 2 | 40.25 | 1722570  | 40.03 | 1260136 | 0.9503  |
| AALDCVELFATEQR              | Sin3A | Sin3A, isoform I                              | 541.6   | 3 | 40.21 | 619337   | 39.99 | 590227  | 1.23798 |
| ANTADGANTVQIHVTGGGAANNPA    | Sin3A | Sin3A, isoform I                              | 928.703 | 4 | 26.74 | 509613   | 26.67 | 542107  | 1.38187 |
| DVSFSEASSK                  | Sin3A | Sin3A, isoform I                              | 528.746 | 2 | 17.44 | 1467180  | 17.41 | 381916  | 0.33815 |
| DYHAGLQQQAHQR               | Sin3A | Sin3A, isoform I                              | 517.919 | 3 | 11.22 | 2585659  | 11.33 | 2959684 | 1.48695 |
| DYHAGLQQQAHQR               | Sin3A | Sin3A, isoform I                              | 388.691 | 4 | 11.22 | 864204   | 11.33 | 948677  | 1.42602 |
| ESTATALR                    | Sin3A | Sin3A, isoform I                              | 424.727 | 2 | 11.65 | 1476544  | 11.71 | 969884  | 0.85329 |
| FHLDDHLGGTSQTIHQR           | Sin3A | Sin3A, isoform I                              | 654.657 | 3 | 23.08 | 1395287  | 23.06 | 756858  | 0.70465 |
| FHLDDHLGGTSQTIHQR           | Sin3A | Sin3A, isoform I                              | 491.245 | 4 | 23.12 | 3523823  | 23.06 | 1769329 | 0.65225 |
| FLEILHDYQR                  | Sin3A | Sin3A, isoform I                              | 445.235 | 3 | 35.73 | 2969216  | 35.43 | 0       | 0       |
| GTSHQSAEYVQDVLSSCK          | Sin3A | Sin3A, isoform I                              | 727.995 | 3 | 27.24 | 493988   | 27.08 | 189593  | 0.49857 |
| ILTPQHGGAAQTIAYLPSTTPTATNLK | Sin3A | Sin3A, isoform I                              | 898.82  | 3 | 35.8  | 4998395  | 35.62 | 5283785 | 1.37321 |
| LANPALGGGNTGR               | Sin3A | Sin3A, isoform I                              | 627.831 | 2 | 17.75 | 10453019 | 17.75 | 7732981 | 0.96101 |
| LGASYCALPQSTVPK             | Sin3A | Sin3A, isoform I                              | 796.411 | 2 | 28.68 | 1479395  | 28.59 | 1263101 | 1.10911 |
| LHAILCDR                    | Sin3A | Sin3A, isoform I                              | 499.266 | 2 | 19.41 | 1985761  | 19.38 | 633888  | 0.41468 |
| MLTEQEVYTQVAK               | Sin3A | Sin3A, isoform I                              | 778.387 | 2 | 27.81 | 3209047  | 27.77 | 3556038 | 1.4395  |
| NDILFEK                     | Sin3A | Sin3A, isoform I                              | 439.735 | 2 | 27.05 | 2341755  | 27.01 | 1764770 | 0.97897 |
| NPFVAVPIVLK                 | Sin3A | Sin3A, isoform I                              | 598.874 | 2 | 46.1  | 1222769  | 45.94 | 767794  | 0.81569 |
| QFVPDLFFAPR                 | Sin3A | Sin3A, isoform I                              | 668.856 | 2 | 50.52 | 6756025  | 50.25 | 7385320 | 1.42004 |
| SAHAAAIGNLSAVNTSVSIK        | Sin3A | Sin3A, isoform I                              | 956.018 | 2 | 31.61 | 170248   | 31.53 | 254171  | 1.9394  |
| SAHAAAIGNLSAVNTSVSIK        | Sin3A | Sin3A, isoform I                              | 637.681 | 3 | 31.61 | 2399426  | 31.53 | 2575551 | 1.39439 |
| SHCIDTPGVIER                | Sin3A | Sin3A, isoform I                              | 692.338 | 2 | 20.25 | 307279   | 20.24 | 237394  | 1.0036  |
| SHCIDTPGVIER                | Sin3A | Sin3A, isoform I                              | 461.894 | 3 | 20.22 | 598355   | 20.24 | 340785  | 0.73985 |
| SSPGISYATPPLPSGPHGQHNSGS    | Sin3A | Sin3A, isoform I                              | 887.432 | 3 | 25.86 | 488181   | 25.83 | 202251  | 0.53819 |
| TILDDAANLLIHHVK             | Sin3A | Sin3A, isoform I                              | 418.99  | 4 | 49.12 | 1380604  | 49.31 | 716808  | 0.67446 |
| TISGTQTVATAVGNLATISQQQPQVQ  | Sin3A | Sin3A, isoform I                              | 1041.89 | 3 | 45.65 | 3056186  | 45.35 | 3369934 | 1.4324  |
| TYNNNQQQQNHVIGSGLNATR       | Sin3A | Sin3A, isoform I                              | 786.383 | 3 | 19.45 | 600429   | 19.45 | 504776  | 1.09209 |
| VLENLQK                     | Sin3A | Sin3A, isoform I                              | 422.25  | 2 | 16.41 | 3516505  | 16.41 | 2648950 | 0.97855 |
| VTIELLDSEPEEVDKPAALK        | Sin3A | Sin3A, isoform I                              | 732.726 | 3 | 39.02 | 4118678  | 38.81 | 3130918 | 0.9875  |
| YVGHPNQNLTGHNAK             | Sin3A | Sin3A, isoform I                              | 619.975 | 3 | 10.09 | 210214   | 10.13 | 163530  | 1.01055 |
| DGSLNYIEENDEVLVAGFGR        | RpS23 | GEO04460p1 (Ribosomal protein S23, isoform B) | 1099.02 | 2 | 48.42 | 759053   | 48.15 | 930050  | 1.59168 |
| DGSLNYIEENDEVLVAGFGR        | RpS23 | GEO04460p1 (Ribosomal protein S23, isoform B) | 733.018 | 3 | 48.42 | 744083   | 48.11 | 1097192 | 1.91551 |
| ITAFVPR                     | RpS23 | GEO04460p1 (Ribosomal protein S23, isoform B) | 402.242 | 2 | 24.96 | 1909159  | 24.94 | 2341284 | 1.59307 |

|                            |       |                                               |         |   |       |         |       |         |         |
|----------------------------|-------|-----------------------------------------------|---------|---|-------|---------|-------|---------|---------|
| VANVSLALYK                 | RpS23 | GEO04460p1 (Ribosomal protein S23, isoform B) | 595.861 | 2 | 41.4  | 2813053 | 41.22 | 3213274 | 1.48386 |
| EQQYISSVDPK                | cora  | Coracle, isoform F                            | 690.836 | 2 | 19.72 | 1077568 | 19.73 | 711194  | 0.85736 |
| IAPNQTALEDK                | cora  | Coracle, isoform F                            | 664.838 | 2 | 18.46 | 483773  | 18.46 | 266610  | 0.71591 |
| ITIQSDGDPIDHDK             | cora  | Coracle, isoform F                            | 518.586 | 3 | 21.49 | 444280  | 21.51 | 465036  | 1.35973 |
| LDDTLGQVICITPQDNPVVELTVITS | cora  | Coracle, isoform F                            | 999.525 | 3 | 60.96 | 477920  | 60.76 | 355750  | 0.96697 |
| LGKPVSTPTVVK               | cora  | Coracle, isoform F                            | 409.255 | 3 | 19.33 | 1398453 | 19.26 | 958082  | 0.88997 |
| LGLVVTSGGLGDNQQDQNLDEAAR   | cora  | Coracle, isoform F                            | 805.07  | 3 | 37.08 | 2956134 | 36.91 | 3245204 | 1.42607 |
| LIEVGQQIDPIVEVTSLAGK       | cora  | Coracle, isoform F                            | 1055.09 | 2 | 52.4  | 1797413 | 52.06 | 1009797 | 0.72981 |
| LIEVGQQIDPIVEVTSLAGK       | cora  | Coracle, isoform F                            | 703.732 | 3 | 52.36 | 1187434 | 52.06 | 855614  | 0.93603 |
| LILNYAQIDPSHFGK            | cora  | Coracle, isoform F                            | 572.642 | 3 | 39.99 | 1926732 | 39.77 | 2328472 | 1.5699  |
| LLQDPLLSPTTR               | cora  | Coracle, isoform F                            | 677.39  | 2 | 36.71 | 1818393 | 36.6  | 2546599 | 1.81926 |
| LQGSAVDAAAVPLSDSQK         | cora  | Coracle, isoform F                            | 878.957 | 2 | 28.08 | 902207  | 28    | 1209649 | 1.74171 |
| MFPVFGSTYR                 | cora  | Coracle, isoform F                            | 610.792 | 2 | 35.32 | 1647098 | 35.1  | 1475401 | 1.16362 |
| NIDGVTHNVEEEVR             | cora  | Coracle, isoform F                            | 805.892 | 2 | 25.19 | 772422  | 25.18 | 383894  | 0.64562 |
| NIDGVTHNVEEEVR             | cora  | Coracle, isoform F                            | 537.597 | 3 | 25.23 | 1472968 | 25.14 | 947257  | 0.8354  |
| QAQVQTTTETVPITR            | cora  | Coracle, isoform F                            | 836.947 | 2 | 22.76 | 1243364 | 22.75 | 1875309 | 1.95928 |
| QAQVQTTTETVPITR            | cora  | Coracle, isoform F                            | 558.3   | 3 | 22.72 | 338192  | 22.75 | 517745  | 1.98873 |
| SLGVLNLDTGLLDTK            | cora  | Coracle, isoform F                            | 779.938 | 2 | 48.49 | 4006855 | 48.22 | 3396143 | 1.10104 |
| SPLFTTSATTGPHVESTR         | cora  | Coracle, isoform F                            | 630.318 | 3 | 26.47 | 4223504 | 26.38 | 3945529 | 1.21354 |
| SSSSSHGKPALAR              | cora  | Coracle, isoform F                            | 642.836 | 2 | 8.36  | 115696  | 8.51  | 27955   | 0.31388 |
| SSSSSHGKPALAR              | cora  | Coracle, isoform F                            | 428.893 | 3 | 8.36  | 446429  | 8.49  | 229562  | 0.66799 |
| TAQVETSGGQFDPK             | cora  | Coracle, isoform F                            | 732.852 | 2 | 18.64 | 2712306 | 18.61 | 2930955 | 1.40376 |
| TDTWPLTFAVK                | cora  | Coracle, isoform F                            | 639.84  | 2 | 45.17 | 2241253 | 44.93 | 1441517 | 0.83551 |
| TGNLHLVSGVADPK             | cora  | Coracle, isoform F                            | 469.925 | 3 | 24.12 | 894256  | 24.12 | 482494  | 0.70089 |
| TGYVITYGYLDPK              | cora  | Coracle, isoform F                            | 801.924 | 2 | 47.28 | 1483311 | 47.07 | 1539226 | 1.34801 |
| TQAESTNTPVDR               | cora  | Coracle, isoform F                            | 659.815 | 2 | 10.52 | 427177  | 10.65 | 96821   | 0.29443 |
| TTVHTMTLGTGEIDPVTGR        | cora  | Coracle, isoform F                            | 677.346 | 3 | 32.9  | 1242941 | 32.67 | 1420656 | 1.48478 |
| TVYVYNMIDPVTGEIVQVDPNDPR   | cora  | Coracle, isoform F                            | 912.118 | 3 | 48.94 | 447629  | 48.63 | 338096  | 0.98117 |
| VTLLDGSLLDVSIDR            | cora  | Coracle, isoform F                            | 808.449 | 2 | 50.48 | 2980908 | 50.17 | 1512386 | 0.65908 |
| VVLGEDTPGFSHGHEIISTQTVSSK  | cora  | Coracle, isoform F                            | 849.098 | 3 | 34.36 | 2644169 | 34.26 | 2132465 | 1.04765 |
| YGVIDPK                    | cora  | Coracle, isoform F                            | 396.219 | 2 | 18.74 | 1027816 | 18.73 | 968797  | 1.22445 |
| EQQYISSVDPK                | cora  | Coracle, isoform G                            | 690.836 | 2 | 19.72 | 1077568 | 19.73 | 711194  | 0.85736 |
| IAPNQTALEDK                | cora  | Coracle, isoform G                            | 664.838 | 2 | 18.46 | 483773  | 18.46 | 266610  | 0.71591 |
| ITIQSDGDPIDHDK             | cora  | Coracle, isoform G                            | 518.586 | 3 | 21.49 | 444280  | 21.51 | 465036  | 1.35973 |
| LDDTLGQVICITPQDNPVVELTVITS | cora  | Coracle, isoform G                            | 999.525 | 3 | 60.96 | 477920  | 60.76 | 355750  | 0.96697 |
| LGKPVSTPTVVK               | cora  | Coracle, isoform G                            | 409.255 | 3 | 19.33 | 1398453 | 19.26 | 958082  | 0.88997 |
| LGLVVTSGGLGDNQQDQNLDEAAR   | cora  | Coracle, isoform G                            | 805.07  | 3 | 37.08 | 2956134 | 36.91 | 3245204 | 1.42607 |
| LIEVGQQIDPIVEVTSLAGK       | cora  | Coracle, isoform G                            | 1055.09 | 2 | 52.4  | 1797413 | 52.06 | 1009797 | 0.72981 |
| LIEVGQQIDPIVEVTSLAGK       | cora  | Coracle, isoform G                            | 703.732 | 3 | 52.36 | 1187434 | 52.06 | 855614  | 0.93603 |
| LILNYAQIDPSHFGK            | cora  | Coracle, isoform G                            | 572.642 | 3 | 39.99 | 1926732 | 39.77 | 2328472 | 1.5699  |
| LLQDPLLSPTTR               | cora  | Coracle, isoform G                            | 677.39  | 2 | 36.71 | 1818393 | 36.6  | 2546599 | 1.81926 |
| LQGSAVDAAAVPLSDSQK         | cora  | Coracle, isoform G                            | 878.957 | 2 | 28.08 | 902207  | 28    | 1209649 | 1.74171 |
| MFPVFGSTYR                 | cora  | Coracle, isoform G                            | 610.792 | 2 | 35.32 | 1647098 | 35.1  | 1475401 | 1.16362 |
| NIDGVTHNVEEEVR             | cora  | Coracle, isoform G                            | 805.892 | 2 | 25.19 | 772422  | 25.18 | 383894  | 0.64562 |
| NIDGVTHNVEEEVR             | cora  | Coracle, isoform G                            | 537.597 | 3 | 25.23 | 1472968 | 25.14 | 947257  | 0.8354  |
| QAQVQTTTETVPITR            | cora  | Coracle, isoform G                            | 836.947 | 2 | 22.76 | 1243364 | 22.75 | 1875309 | 1.95928 |
| QAQVQTTTETVPITR            | cora  | Coracle, isoform G                            | 558.3   | 3 | 22.72 | 338192  | 22.75 | 517745  | 1.98873 |
| SLGVLNLDTGLLDTK            | cora  | Coracle, isoform G                            | 779.938 | 2 | 48.49 | 4006855 | 48.22 | 3396143 | 1.10104 |
| SPLFTTSATTGPHVESTR         | cora  | Coracle, isoform G                            | 630.318 | 3 | 26.47 | 4223504 | 26.38 | 3945529 | 1.21354 |
| SSSSSHGKPALAR              | cora  | Coracle, isoform G                            | 642.836 | 2 | 8.36  | 115696  | 8.51  | 27955   | 0.31388 |
| SSSSSHGKPALAR              | cora  | Coracle, isoform G                            | 428.893 | 3 | 8.36  | 446429  | 8.49  | 229562  | 0.66799 |
| TAQVETSGGQFDPK             | cora  | Coracle, isoform G                            | 732.852 | 2 | 18.64 | 2712306 | 18.61 | 2930955 | 1.40376 |
| TDTWPLTFAVK                | cora  | Coracle, isoform G                            | 639.84  | 2 | 45.17 | 2241253 | 44.93 | 1441517 | 0.83551 |

|                            |          |                                                                                |         |   |       |          |       |          |         |
|----------------------------|----------|--------------------------------------------------------------------------------|---------|---|-------|----------|-------|----------|---------|
| TGNLHLVSGVADPK             | cora     | Coracle, isoform G                                                             | 469.925 | 3 | 24.12 | 894256   | 24.12 | 482494   | 0.70089 |
| TGYVITYGYLDPK              | cora     | Coracle, isoform G                                                             | 801.924 | 2 | 47.28 | 1483311  | 47.07 | 1539226  | 1.34801 |
| TQAESTNTPVDR               | cora     | Coracle, isoform G                                                             | 659.815 | 2 | 10.52 | 427177   | 10.65 | 96821    | 0.29443 |
| TTVTHTMTLTGEIDPVTGR        | cora     | Coracle, isoform G                                                             | 677.346 | 3 | 32.9  | 1242941  | 32.67 | 1420656  | 1.48478 |
| TVVYVNMIDPVTGEIVQVDPNDPR   | cora     | Coracle, isoform G                                                             | 912.118 | 3 | 48.94 | 447629   | 48.63 | 338096   | 0.98117 |
| VTLLDGSLLDVSDR             | cora     | Coracle, isoform G                                                             | 808.449 | 2 | 50.48 | 2980908  | 50.17 | 1512386  | 0.65908 |
| VVLGEDTPGFSGHGEIISTQTVSSK  | cora     | Coracle, isoform G                                                             | 849.098 | 3 | 34.36 | 2644169  | 34.26 | 2132465  | 1.04765 |
| YGVIDPK                    | cora     | Coracle, isoform G                                                             | 396.219 | 2 | 18.74 | 1027816  | 18.73 | 968797   | 1.22445 |
| FAGVDIR                    | RpS16    | GEO08239p1 (Ribosomal protein S16, isoform B)                                  | 389.216 | 2 | 25.71 | 4573283  | 25.68 | 6173631  | 1.75362 |
| LQEPLLLLGK                 | RpS16    | GEO08239p1 (Ribosomal protein S16, isoform B)                                  | 562.358 | 2 | 43.68 | 9036494  | 43.47 | 7008865  | 1.00756 |
| EFTLEFSR                   | SERCA    | Calcium-transporting ATPase (EC 7.2.2.10)                                      | 514.756 | 2 | 35.79 | 511756   | 35.66 | 541898   | 1.37555 |
| GVVIGTGLSTAIGK             | SERCA    | Calcium-transporting ATPase (EC 7.2.2.10)                                      | 636.88  | 2 | 34.79 | 1157677  | 34.58 | 1583799  | 1.77719 |
| IDQSILTGESVSVIK            | SERCA    | Calcium-transporting ATPase (EC 7.2.2.10)                                      | 794.943 | 2 | 37.8  | 1179386  | 37.6  | 1456916  | 1.60473 |
| IGVFAEDEDTTGK              | SERCA    | Calcium-transporting ATPase (EC 7.2.2.10)                                      | 691.328 | 2 | 25.89 | 1569911  | 25.87 | 1880132  | 1.55574 |
| ITHIYSTTLR                 | SERCA    | Calcium-transporting ATPase (EC 7.2.2.10)                                      | 602.838 | 2 | 20.66 | 336218   | 20.64 | 473921   | 1.83108 |
| ITHIYSTTLR                 | SERCA    | Calcium-transporting ATPase (EC 7.2.2.10)                                      | 402.228 | 3 | 20.66 | 1041150  | 20.64 | 1511216  | 1.88554 |
| LNSFVSNK                   | SERCA    | Calcium-transporting ATPase (EC 7.2.2.10)                                      | 454.745 | 2 | 18.74 | 212026   | 18.69 | 338612   | 2.07461 |
| NILFSGTNVAAGK              | SERCA    | Calcium-transporting ATPase (EC 7.2.2.10)                                      | 646.354 | 2 | 32.18 | 877088   | 32.05 | 1429695  | 2.1175  |
| TVEQSLNFFGTDPER            | SERCA    | Calcium-transporting ATPase (EC 7.2.2.10)                                      | 870.415 | 2 | 39.92 | 733529   | 39.73 | 1152158  | 2.04041 |
| SVYAAEER                   | Mlp60A   | Muscle LIM protein at 60A, isoform F                                           | 462.725 | 2 | 11.82 | 2588129  | 11.89 | 1417299  | 0.71137 |
| ALTVPELTQQMFDAK            | betaTub6 | Tubulin beta chain                                                             | 854.435 | 2 | 37.81 | 1590296  | 37.56 | 1317924  | 1.07655 |
| IMNTYSVVPSPK               | betaTub6 | Tubulin beta chain                                                             | 668.352 | 2 | 29.06 | 1095355  | 28.94 | 858780   | 1.01847 |
| LAVNMVFPFR                 | betaTub6 | Tubulin beta chain                                                             | 572.321 | 2 | 40.41 | 1793279  | 40.19 | 932227   | 0.6753  |
| LAVNMVFPFR                 | betaTub6 | Tubulin beta chain                                                             | 580.318 | 2 | 34.29 | 768535   | 34.41 | 1250344  | 2.11343 |
| LHFFMPGFAPLTSR             | betaTub6 | Tubulin beta chain                                                             | 540.95  | 3 | 48.83 | 2785496  | 48.88 | 1571753  | 0.733   |
| LHFFMPGFAPLTSR             | betaTub6 | Tubulin beta chain                                                             | 546.282 | 3 | 42.62 | 1500055  | 42.47 | 820442   | 0.7105  |
| NSSYFVEWIPNNVK             | betaTub6 | Tubulin beta chain                                                             | 848.92  | 2 | 44.43 | 6003407  | 44.1  | 632379   | 0.13684 |
| SIFSFPQQVK                 | prom     | Prominin, isoform E                                                            | 647.843 | 2 | 36.49 | 1196743  | 36.37 | 1335180  | 1.44931 |
| TLQEDQSIFR                 | prom     | Prominin, isoform E                                                            | 618.815 | 2 | 28.08 | 1390520  | 28.05 | 1856704  | 1.73455 |
| VALQIQDVATSSR              | prom     | Prominin, isoform E                                                            | 694.381 | 2 | 29.91 | 3286792  | 29.77 | 3985799  | 1.57531 |
| AEEILER                    | RpL11    | Ribosomal protein L11, isoform B                                               | 430.23  | 2 | 17.53 | 3556219  | 17.53 | 2139819  | 0.78165 |
| IAVHCTVR                   | RpL11    | Ribosomal protein L11, isoform B                                               | 478.261 | 2 | 12.42 | 1451582  | 12.46 | 1036746  | 0.9278  |
| SGTVGFQHR                  | RpL11    | Ribosomal protein L11, isoform B                                               | 494.752 | 2 | 11.45 | 1263829  | 11.54 | 829082   | 0.85218 |
| VLEQLTGQQPVFSK             | RpL11    | Ribosomal protein L11, isoform B                                               | 787.433 | 2 | 33.08 | 9876999  | 32.94 | 10033931 | 1.31968 |
| YDPSIGIYGLDFYVVLGRPGYVNVH  | RpL11    | Ribosomal protein L11, isoform B                                               | 746.882 | 4 | 53.64 | 810217   | 53.57 | 534216   | 0.85652 |
| AAIELNR                    | DHC3B    | Uncharacterized protein, isoform G (EC 3.6.1.3) (EC 3.6.4.5)                   | 393.727 | 2 | 17.87 | 27934492 | 17.87 | 8147882  | 0.3789  |
| AGFAGDDAPR                 | Act87E   | Actin 87E, isoform C                                                           | 488.728 | 2 | 15.06 | 5346544  | 15.03 | 6072874  | 1.47551 |
| AVFPSIVGRPR                | Act87E   | Actin 87E, isoform C                                                           | 599.856 | 2 | 30.18 | 3527039  | 29.97 | 6233553  | 2.29587 |
| DSYVGDEAQS                 | Act87E   | Actin 87E, isoform C                                                           | 599.765 | 2 | 11.94 | 533801   | 12.02 | 513658   | 1.25002 |
| IWHHTFYNELR                | Act87E   | Actin 87E, isoform C                                                           | 505.921 | 3 | 25.48 | 1669489  | 25.49 | 2792816  | 2.17311 |
| SYELPDGQVITIGNER           | Act87E   | Actin 87E, isoform C                                                           | 895.95  | 2 | 39.17 | 5791673  | 39    | 8517636  | 1.91046 |
| SYELPDGQVITIGNER           | Act87E   | Actin 87E, isoform C                                                           | 597.635 | 3 | 39.17 | 427938   | 38.97 | 800279   | 2.42931 |
| TTGIVLDSGDGVSHTVPIYEGYALPI | Act87E   | Actin 87E, isoform C                                                           | 1051.22 | 3 | 45.78 | 1749429  | 45.58 | 1016220  | 0.75459 |
| VAPEEHPVLLTEAPLNPK         | Act87E   | Actin 87E, isoform C                                                           | 977.536 | 2 | 34.25 | 620752   | 34.11 | 748708   | 1.56681 |
| VAPEEHPVLLTEAPLNPK         | Act87E   | Actin 87E, isoform C                                                           | 652.026 | 3 | 34.21 | 12031327 | 34.11 | 16999678 | 1.83548 |
| NFSGAELEGLVR               | Nsf2     | N-ethylmaleimide-sensitive factor 2, isoform B (N-ethylmaleimide-sensitive fac | 646.336 | 2 | 38.11 | 673204   | 37.95 | 671954   | 1.29663 |
| LVPVAGLVDSFQK              | ATPsynD  | ATP synthase subunit d, mitochondrial                                          | 686.895 | 2 | 44.34 | 1462212  | 44.11 | 1311560  | 1.1652  |
| VQVGHAPSPNLK               | tau      | Tau, isoform H                                                                 | 416.235 | 3 | 17.44 | 993769   | 17.41 | 1404801  | 1.83633 |
| ALNLNPTLALIEK              | Mlc1     | Myosin alkali light chain 1, isoform D                                         | 705.422 | 2 | 45.94 | 2478744  | 45.73 | 4382358  | 2.29667 |
| VQVGHAPSPNLK               | tau      | Microtubule-associated protein                                                 | 416.235 | 3 | 17.44 | 993769   | 17.41 | 1404801  | 1.83633 |
| VQVGHAPSPNLK               | tau      | Microtubule-associated protein                                                 | 416.235 | 3 | 17.44 | 993769   | 17.41 | 1404801  | 1.83633 |
| VQVGHAPSPNLK               | tau      | Microtubule-associated protein                                                 | 416.235 | 3 | 17.44 | 993769   | 17.41 | 1404801  | 1.83633 |
| VQVGHAPSPNLK               | tau      | Microtubule-associated protein                                                 | 416.235 | 3 | 17.44 | 993769   | 17.41 | 1404801  | 1.83633 |

|                             |           |                                                                              |         |   |       |          |       |         |         |
|-----------------------------|-----------|------------------------------------------------------------------------------|---------|---|-------|----------|-------|---------|---------|
| TFIVQGFQNVGLHTR             | Gdh       | Glutamate dehydrogenase                                                      | 582.981 | 3 | 38.87 | 1874134  | 38.58 | 1474266 | 1.02187 |
| EYANDIGFK                   | RpS29     | GEO09636p1 (Ribosomal protein S29, isoform B)                                | 528.753 | 2 | 24.55 | 5298011  | 24.52 | 4571746 | 1.12096 |
| YGLNICR                     | RpS29     | GEO09636p1 (Ribosomal protein S29, isoform B)                                | 448.226 | 2 | 23.96 | 2206338  | 23.96 | 2842385 | 1.67353 |
| ALDSMQASLEAEAK              | Mhc       | Myosin heavy chain, isoform V (EC 3.6.1.3)                                   | 732.356 | 2 | 29.64 | 321135   | 29.49 | 790332  | 3.19701 |
| ALDSMQASLEAEAK              | Mhc       | Myosin heavy chain, isoform V (EC 3.6.1.3)                                   | 740.353 | 2 | 21.04 | 48359    | 20.88 | 260236  | 6.99057 |
| DLEEANIQHESLANLR            | Mhc       | Myosin heavy chain, isoform V (EC 3.6.1.3)                                   | 651.661 | 3 | 31.08 | 667254   | 31    | 1249882 | 2.43333 |
| GALQDYQER                   | Mhc       | Myosin heavy chain, isoform V (EC 3.6.1.3)                                   | 540.259 | 2 | 15.57 | 503772   | 15.55 | 1324414 | 3.41517 |
| IEEEEEVEAER                 | Mhc       | Myosin heavy chain, isoform V (EC 3.6.1.3)                                   | 737.849 | 2 | 27.66 | 871072   | 27.57 | 2436877 | 3.63414 |
| LAEAEETIESLNQK              | Mhc       | Myosin heavy chain, isoform V (EC 3.6.1.3)                                   | 787.899 | 2 | 29.52 | 307761   | 29.44 | 1119309 | 4.72453 |
| LAGADIETYLLEK               | Mhc       | Myosin heavy chain, isoform V (EC 3.6.1.3)                                   | 718.388 | 2 | 42.99 | 649408   | 42.76 | 1212276 | 2.42497 |
| LTQEAVADLER                 | Mhc       | Myosin heavy chain, isoform V (EC 3.6.1.3)                                   | 622.828 | 2 | 25.2  | 753282   | 25.18 | 1645891 | 2.83835 |
| NYSTELFR                    | Mhc       | Myosin heavy chain, isoform V (EC 3.6.1.3)                                   | 515.254 | 2 | 28.61 | 584482   | 28.59 | 1201453 | 2.67029 |
| QIEEAEI AALNLAK             | Mhc       | Myosin heavy chain, isoform V (EC 3.6.1.3)                                   | 821.438 | 2 | 39.84 | 244676   | 39.61 | 641209  | 3.40432 |
| QLEAEQSQVLSK                | Mhc       | Myosin heavy chain, isoform V (EC 3.6.1.3)                                   | 788.397 | 2 | 24.66 | 238416   | 24.6  | 763584  | 4.16048 |
| TALLDLSLGEK                 | Mhc       | Myosin heavy chain, isoform V (EC 3.6.1.3)                                   | 567.306 | 2 | 31.71 | 635833   | 31.55 | 1551318 | 3.16942 |
| TLLEQADR                    | Mhc       | Myosin heavy chain, isoform V (EC 3.6.1.3)                                   | 473.254 | 2 | 18.74 | 809820   | 18.73 | 1724785 | 2.76674 |
| VIAYFATVGASK                | Mhc       | Myosin heavy chain, isoform V (EC 3.6.1.3)                                   | 613.843 | 2 | 33.65 | 620379   | 33.48 | 1435185 | 3.0052  |
| AALDCVELFATEQR              | Sin3A     | Sin3A, isoform J                                                             | 811.896 | 2 | 40.25 | 1722570  | 40.03 | 1260136 | 0.9503  |
| AALDCVELFATEQR              | Sin3A     | Sin3A, isoform J                                                             | 541.6   | 3 | 40.21 | 619337   | 39.99 | 590227  | 1.23798 |
| ANTADGANTVQIHVTGGGAANNPA    | Sin3A     | Sin3A, isoform J                                                             | 928.703 | 4 | 26.74 | 509613   | 26.67 | 542107  | 1.38187 |
| DVSFSEASSK                  | Sin3A     | Sin3A, isoform J                                                             | 528.746 | 2 | 17.44 | 1467180  | 17.41 | 381916  | 0.33815 |
| DYHAGLQQQAHQR               | Sin3A     | Sin3A, isoform J                                                             | 517.919 | 3 | 11.22 | 2585659  | 11.33 | 2959684 | 1.48695 |
| DYHAGLQQQAHQR               | Sin3A     | Sin3A, isoform J                                                             | 388.691 | 4 | 11.22 | 864204   | 11.33 | 948677  | 1.42602 |
| ESTATALR                    | Sin3A     | Sin3A, isoform J                                                             | 424.727 | 2 | 11.65 | 1476544  | 11.71 | 969884  | 0.85329 |
| FHLDDHLGGTSQTIHQR           | Sin3A     | Sin3A, isoform J                                                             | 654.657 | 3 | 23.08 | 1395287  | 23.06 | 756858  | 0.70465 |
| FHLDDHLGGTSQTIHQR           | Sin3A     | Sin3A, isoform J                                                             | 491.245 | 4 | 23.12 | 3523823  | 23.06 | 1769329 | 0.65225 |
| FLEILHDYQR                  | Sin3A     | Sin3A, isoform J                                                             | 445.235 | 3 | 35.73 | 2969216  | 35.43 | 0       | 0       |
| GTSHQSAAEYVQDVLSSCK         | Sin3A     | Sin3A, isoform J                                                             | 727.995 | 3 | 27.24 | 493988   | 27.08 | 189593  | 0.49857 |
| ILTPQHGGGAQTIAYLPSTTPTATNLK | Sin3A     | Sin3A, isoform J                                                             | 898.82  | 3 | 35.8  | 4998395  | 35.62 | 5283785 | 1.37321 |
| LANPALGGGGNTGR              | Sin3A     | Sin3A, isoform J                                                             | 627.831 | 2 | 17.75 | 10453019 | 17.75 | 7732981 | 0.96101 |
| LGASYCALPQSTVPK             | Sin3A     | Sin3A, isoform J                                                             | 796.411 | 2 | 28.68 | 1479395  | 28.59 | 1263101 | 1.10911 |
| LHAILCDR                    | Sin3A     | Sin3A, isoform J                                                             | 499.266 | 2 | 19.41 | 1985761  | 19.38 | 633888  | 0.41468 |
| MLTEQEVYTVQVAK              | Sin3A     | Sin3A, isoform J                                                             | 778.387 | 2 | 27.81 | 3209047  | 27.77 | 3556038 | 1.4395  |
| NDILFEK                     | Sin3A     | Sin3A, isoform J                                                             | 439.735 | 2 | 27.05 | 2341755  | 27.01 | 1764770 | 0.97897 |
| NPFVAVPIVLK                 | Sin3A     | Sin3A, isoform J                                                             | 598.874 | 2 | 46.1  | 1222769  | 45.94 | 767794  | 0.81569 |
| QFVPDLFFAPR                 | Sin3A     | Sin3A, isoform J                                                             | 668.856 | 2 | 50.52 | 6756025  | 50.25 | 7385320 | 1.42004 |
| SAHAAAIGNLSAVNTSVSIK        | Sin3A     | Sin3A, isoform J                                                             | 956.018 | 2 | 31.61 | 170248   | 31.53 | 254171  | 1.9394  |
| SAHAAAIGNLSAVNTSVSIK        | Sin3A     | Sin3A, isoform J                                                             | 637.681 | 3 | 31.61 | 2399426  | 31.53 | 2575551 | 1.39439 |
| SHCIDTPGVIER                | Sin3A     | Sin3A, isoform J                                                             | 692.338 | 2 | 20.25 | 307279   | 20.24 | 237394  | 1.0036  |
| SHCIDTPGVIER                | Sin3A     | Sin3A, isoform J                                                             | 461.894 | 3 | 20.22 | 598355   | 20.24 | 340785  | 0.73985 |
| SSPGISYATPPLPSGPHGQHNSGS    | Sin3A     | Sin3A, isoform J                                                             | 887.432 | 3 | 25.86 | 488181   | 25.83 | 202251  | 0.53819 |
| TILDAAANLLIHHVK             | Sin3A     | Sin3A, isoform J                                                             | 418.99  | 4 | 49.12 | 1380604  | 49.31 | 716808  | 0.67446 |
| TISGTQTVATAVGNLATISQQQPQVQ  | Sin3A     | Sin3A, isoform J                                                             | 1041.89 | 3 | 45.65 | 3056186  | 45.35 | 3369934 | 1.4324  |
| TYNNTQQQNHVIGSGLNATR        | Sin3A     | Sin3A, isoform J                                                             | 786.383 | 3 | 19.45 | 600429   | 19.45 | 504776  | 1.09209 |
| VLENLQK                     | Sin3A     | Sin3A, isoform J                                                             | 422.25  | 2 | 16.41 | 3516505  | 16.41 | 2648950 | 0.97855 |
| VTIELLDSEPEEVDKPAALK        | Sin3A     | Sin3A, isoform J                                                             | 732.726 | 3 | 39.02 | 4118678  | 38.81 | 3130918 | 0.9875  |
| YVGHPNQNLTGHNAK             | Sin3A     | Sin3A, isoform J                                                             | 619.975 | 3 | 10.09 | 210214   | 10.13 | 163530  | 1.01055 |
| VVYDPQTAELSSK               | ScsbetaA  | Succinate--CoA ligase [ADP-forming] subunit beta, mitochondrial (EC 6.2.1.5) | 783.388 | 2 | 26.05 | 1092441  | 25.98 | 763625  | 0.90804 |
| VQVGHAPSPNLK                | tau       | Microtubule-associated protein                                               | 416.235 | 3 | 17.44 | 993769   | 17.41 | 1404801 | 1.83633 |
| SIFSNFPQQVK                 | prom      | IP13255p (Prominin, isoform B)                                               | 647.843 | 2 | 36.49 | 1196743  | 36.37 | 1335180 | 1.44931 |
| TLQEDQSIFR                  | prom      | IP13255p (Prominin, isoform B)                                               | 618.815 | 2 | 28.08 | 1390520  | 28.05 | 1856704 | 1.73455 |
| VALQIQDVATSSR               | prom      | IP13255p (Prominin, isoform B)                                               | 694.381 | 2 | 29.91 | 3286792  | 29.77 | 3985799 | 1.57531 |
| NFPALTYFR                   | I(2)01289 | Lethal (2) 01289, isoform A                                                  | 564.795 | 2 | 42.88 | 433584   | 42.79 | 472450  | 1.41548 |

|                               |          |                                                                         |         |   |       |          |       |         |         |
|-------------------------------|----------|-------------------------------------------------------------------------|---------|---|-------|----------|-------|---------|---------|
| DFYQIR                        | CG1620   | Uncharacterized protein, isoform A (Uncharacterized protein, isoform C) | 421.214 | 2 | 25.63 | 4058468  | 25.64 | 3651345 | 1.16873 |
| DNEQALHLLVQCQGYDFK            | CG1620   | Uncharacterized protein, isoform A (Uncharacterized protein, isoform C) | 683.995 | 3 | 42.88 | 848275   | 42.64 | 432717  | 0.66266 |
| ELVHFYYLWK                    | CG1620   | Uncharacterized protein, isoform A (Uncharacterized protein, isoform C) | 699.366 | 2 | 44.45 | 3217079  | 44.31 | 2152154 | 0.86903 |
| ELVHFYYLWK                    | CG1620   | Uncharacterized protein, isoform A (Uncharacterized protein, isoform C) | 466.58  | 3 | 44.45 | 3541291  | 44.31 | 2675658 | 0.9815  |
| SHLLDLYPDESFDLAPTCGEETER      | CG1620   | Uncharacterized protein, isoform A (Uncharacterized protein, isoform C) | 965.111 | 3 | 46.58 | 8771567  | 46.33 | 5071262 | 0.75104 |
| SSDHSQHSASEASADSGSLANSDL      | CG1620   | Uncharacterized protein, isoform A (Uncharacterized protein, isoform C) | 740.089 | 4 | 22.78 | 177697   | 22.79 | 299818  | 2.19179 |
| SYSIMTGSQAVGNPSSGGNR          | CG1620   | Uncharacterized protein, isoform A (Uncharacterized protein, isoform C) | 941.939 | 2 | 25.71 | 2675687  | 25.67 | 2818270 | 1.36826 |
| SYSIMTGSQAVGNPSSGGNR          | CG1620   | Uncharacterized protein, isoform A (Uncharacterized protein, isoform C) | 628.295 | 3 | 25.75 | 615003   | 25.63 | 817516  | 1.7268  |
| SYSIMTGSQAVGNPSSGGNR          | CG1620   | Uncharacterized protein, isoform A (Uncharacterized protein, isoform C) | 633.627 | 3 | 20.74 | 1262978  | 20.76 | 1244066 | 1.27959 |
| YGGTAASPAMSSSNR               | CG1620   | Uncharacterized protein, isoform A (Uncharacterized protein, isoform C) | 728.828 | 2 | 13.99 | 2532481  | 13.97 | 2794880 | 1.43364 |
| YGGTAASPAMSSSNR               | CG1620   | Uncharacterized protein, isoform A (Uncharacterized protein, isoform C) | 736.825 | 2 | 10.01 | 2951260  | 10.18 | 1942943 | 0.85521 |
| LGGVPVGVIAVETR                | ACC      | Acetyl-CoA carboxylase, isoform A (EC 6.4.1.2)                          | 683.906 | 2 | 38.38 | 348778   | 38.27 | 503425  | 1.87503 |
| EAVGAFIVFDVTR                 | Rab32    | FI09421p (Rab32, isoform D)                                             | 712.383 | 2 | 49.81 | 1401007  | 49.56 | 1390509 | 1.28931 |
| EAVGAFIVFDVTR                 | Rab32    | Rab32, isoform I                                                        | 712.383 | 2 | 49.81 | 1401007  | 49.56 | 1390509 | 1.28931 |
| FEVGS AVR                     | Rab32    | Rab32, isoform I                                                        | 432.732 | 2 | 20.96 | 1713425  | 21.01 | 2519725 | 1.91034 |
| SPLSAYEALAAAASQQPNSNEEL       | Rab32    | Rab32, isoform I                                                        | 1026.49 | 3 | 47.1  | 622725   | 46.88 | 729415  | 1.5216  |
| EAVGAFIVFDVTR                 | Rab32    | Rab32, isoform B                                                        | 712.383 | 2 | 49.81 | 1401007  | 49.56 | 1390509 | 1.28931 |
| ESPSASPSPLITTTSTR             | Rab32    | Rab32, isoform B                                                        | 930.963 | 2 | 27.24 | 387801   | 27.15 | 224693  | 0.75267 |
| FEVGS AVR                     | Rab32    | Rab32, isoform B                                                        | 432.732 | 2 | 20.96 | 1713425  | 21.01 | 2519725 | 1.91034 |
| SAEEEEAQETPGELEDVASSISTDSC    | Rab32    | Rab32, isoform B                                                        | 969.779 | 3 | 43.29 | 1179345  | 43.05 | 1501276 | 1.65364 |
| SDTDYLT PAAEER                | Rab32    | Rab32, isoform B                                                        | 734.334 | 2 | 23.54 | 1844209  | 23.46 | 1876636 | 1.32188 |
| SPLSAYEALAAAASQQPNSNEEL       | Rab32    | Rab32, isoform B                                                        | 1026.49 | 3 | 47.1  | 622725   | 46.88 | 729415  | 1.5216  |
| APNPPTPVR                     | Twdlbeta | Tweedlebeta                                                             | 474.767 | 2 | 13.67 | 4226855  | 15.45 | 3159825 | 0.97111 |
| QVLPPP VQDEHK                 | Twdlbeta | Tweedlebeta                                                             | 462.917 | 3 | 19.53 | 1557367  | 19.59 | 3924824 | 3.2738  |
| TLVYVLVK                      | Twdlbeta | Tweedlebeta                                                             | 467.802 | 2 | 36.56 | 5020293  | 36.32 | 6917808 | 1.79004 |
| AFSVALESIP LALAENSG LHPIETLSI | CCT5     | Chaperonin containing TCP1 subunit 5, isoform B                         | 1017.22 | 3 | 62.61 | 384652   | 62.45 | 401044  | 1.3544  |
| FEELTPEK                      | CCT5     | Chaperonin containing TCP1 subunit 5, isoform B                         | 496.75  | 2 | 20.66 | 516313   | 20.64 | 311483  | 0.78369 |
| IADGFELAAQCAIK                | CCT5     | Chaperonin containing TCP1 subunit 5, isoform B                         | 753.885 | 2 | 37.31 | 382322   | 37.14 | 458415  | 1.55759 |
| LGVAGLVR                      | CCT5     | Chaperonin containing TCP1 subunit 5, isoform B                         | 392.756 | 2 | 29.1  | 644815   | 29.01 | 620261  | 1.24957 |
| ILTG VVR                      | RpS11    | Ribosomal protein S11, isoform B                                        | 379.25  | 2 | 21.96 | 1109408  | 21.94 | 1280841 | 1.49978 |
| AALDCVELFATEQR                | Sin3A    | Sin3A, isoform A (Sin3A, isoform F)                                     | 811.896 | 2 | 40.25 | 1722570  | 40.03 | 1260136 | 0.9503  |
| AALDCVELFATEQR                | Sin3A    | Sin3A, isoform A (Sin3A, isoform F)                                     | 541.6   | 3 | 40.21 | 619337   | 39.99 | 590227  | 1.23798 |
| ANTADGANTVQIHVTGGGAANNPA      | Sin3A    | Sin3A, isoform A (Sin3A, isoform F)                                     | 928.703 | 4 | 26.74 | 509613   | 26.67 | 542107  | 1.38187 |
| DVSFSEASSK                    | Sin3A    | Sin3A, isoform A (Sin3A, isoform F)                                     | 528.746 | 2 | 17.44 | 1467180  | 17.41 | 381916  | 0.33815 |
| DYHAGLQQQAHR                  | Sin3A    | Sin3A, isoform A (Sin3A, isoform F)                                     | 517.919 | 3 | 11.22 | 2585659  | 11.33 | 2959684 | 1.48695 |
| DYHAGLQQQAHR                  | Sin3A    | Sin3A, isoform A (Sin3A, isoform F)                                     | 388.691 | 4 | 11.22 | 864204   | 11.33 | 948677  | 1.42602 |
| ESTATALR                      | Sin3A    | Sin3A, isoform A (Sin3A, isoform F)                                     | 424.727 | 2 | 11.65 | 1476544  | 11.71 | 969884  | 0.85329 |
| FHLDDHLGGTSQT IHR             | Sin3A    | Sin3A, isoform A (Sin3A, isoform F)                                     | 654.657 | 3 | 23.08 | 1395287  | 23.06 | 756858  | 0.70465 |
| FHLDDHLGGTSQT IHR             | Sin3A    | Sin3A, isoform A (Sin3A, isoform F)                                     | 491.245 | 4 | 23.12 | 3523823  | 23.06 | 1769329 | 0.65225 |
| FLEILHDYQR                    | Sin3A    | Sin3A, isoform A (Sin3A, isoform F)                                     | 445.235 | 3 | 35.73 | 2969216  | 35.43 | 0       | 0       |
| GTSHQSAAEYVQD VDLSSCK         | Sin3A    | Sin3A, isoform A (Sin3A, isoform F)                                     | 727.995 | 3 | 27.24 | 493988   | 27.08 | 189593  | 0.49857 |
| ILTPQHGG AQT IAYLPSTTPTATNLK  | Sin3A    | Sin3A, isoform A (Sin3A, isoform F)                                     | 898.82  | 3 | 35.8  | 4998395  | 35.62 | 5283785 | 1.37321 |
| LANPALGGGGNTGR                | Sin3A    | Sin3A, isoform A (Sin3A, isoform F)                                     | 627.831 | 2 | 17.75 | 10453019 | 17.75 | 7732981 | 0.96101 |
| LGASYCALPQSTVPK               | Sin3A    | Sin3A, isoform A (Sin3A, isoform F)                                     | 796.411 | 2 | 28.68 | 1479395  | 28.59 | 1263101 | 1.10911 |
| LHAILCDR                      | Sin3A    | Sin3A, isoform A (Sin3A, isoform F)                                     | 499.266 | 2 | 19.41 | 1985761  | 19.38 | 633888  | 0.41468 |
| MLTEQEVYTVQVAK                | Sin3A    | Sin3A, isoform A (Sin3A, isoform F)                                     | 778.387 | 2 | 27.81 | 3209047  | 27.77 | 3556038 | 1.4395  |
| NDILFEK                       | Sin3A    | Sin3A, isoform A (Sin3A, isoform F)                                     | 439.735 | 2 | 27.05 | 2341755  | 27.01 | 1764770 | 0.97897 |
| NPFVAVPIVLK                   | Sin3A    | Sin3A, isoform A (Sin3A, isoform F)                                     | 598.874 | 2 | 46.1  | 1222769  | 45.94 | 767794  | 0.81569 |
| QFVPDLFFAPR                   | Sin3A    | Sin3A, isoform A (Sin3A, isoform F)                                     | 668.856 | 2 | 50.52 | 6756025  | 50.25 | 7385320 | 1.42004 |
| SAHAAAIGNLSAVNTSVSIK          | Sin3A    | Sin3A, isoform A (Sin3A, isoform F)                                     | 956.018 | 2 | 31.61 | 170248   | 31.53 | 254171  | 1.9394  |
| SAHAAAIGNLSAVNTSVSIK          | Sin3A    | Sin3A, isoform A (Sin3A, isoform F)                                     | 637.681 | 3 | 31.61 | 2399426  | 31.53 | 2575551 | 1.39439 |
| SHCIDTPGVI ER                 | Sin3A    | Sin3A, isoform A (Sin3A, isoform F)                                     | 692.338 | 2 | 20.25 | 307279   | 20.24 | 237394  | 1.0036  |
| SHCIDTPGVI ER                 | Sin3A    | Sin3A, isoform A (Sin3A, isoform F)                                     | 461.894 | 3 | 20.22 | 598355   | 20.24 | 340785  | 0.73985 |

|                            |          |                                             |         |   |       |          |       |         |         |
|----------------------------|----------|---------------------------------------------|---------|---|-------|----------|-------|---------|---------|
| SSPGISYATPPLPSGPHGQHNSGS   | Sin3A    | Sin3A, isoform A (Sin3A, isoform F)         | 887.432 | 3 | 25.86 | 488181   | 25.83 | 202251  | 0.53819 |
| TILDDAANLLIHHVK            | Sin3A    | Sin3A, isoform A (Sin3A, isoform F)         | 418.99  | 4 | 49.12 | 1380604  | 49.31 | 716808  | 0.67446 |
| TISGTQTVATAVGNLATISQQQPQVQ | Sin3A    | Sin3A, isoform A (Sin3A, isoform F)         | 1041.89 | 3 | 45.65 | 3056186  | 45.35 | 3369934 | 1.4324  |
| TYNNNQQQQNHVIGSGLNATR      | Sin3A    | Sin3A, isoform A (Sin3A, isoform F)         | 786.383 | 3 | 19.45 | 600429   | 19.45 | 504776  | 1.09209 |
| VLENLQK                    | Sin3A    | Sin3A, isoform A (Sin3A, isoform F)         | 422.25  | 2 | 16.41 | 3516505  | 16.41 | 2648950 | 0.97855 |
| VTIELLDSEPEEVDKPAALK       | Sin3A    | Sin3A, isoform A (Sin3A, isoform F)         | 732.726 | 3 | 39.02 | 4118678  | 38.81 | 3130918 | 0.9875  |
| YVGHPAPNQNLTGHNAK          | Sin3A    | Sin3A, isoform A (Sin3A, isoform F)         | 619.975 | 3 | 10.09 | 210214   | 10.13 | 163530  | 1.01055 |
| AALDCVELFATEQR             | Sin3A    | Sin3A, isoform D                            | 811.896 | 2 | 40.25 | 1722570  | 40.03 | 1260136 | 0.9503  |
| AALDCVELFATEQR             | Sin3A    | Sin3A, isoform D                            | 541.6   | 3 | 40.21 | 619337   | 39.99 | 590227  | 1.23798 |
| ANTADGANTVQIHVTGGGAANNPA   | Sin3A    | Sin3A, isoform D                            | 928.703 | 4 | 26.74 | 509613   | 26.67 | 542107  | 1.38187 |
| DVSFSEASSK                 | Sin3A    | Sin3A, isoform D                            | 528.746 | 2 | 17.44 | 1467180  | 17.41 | 381916  | 0.33815 |
| DYHAGLQQAHQR               | Sin3A    | Sin3A, isoform D                            | 517.919 | 3 | 11.22 | 2585659  | 11.33 | 2959684 | 1.48695 |
| DYHAGLQQAHQR               | Sin3A    | Sin3A, isoform D                            | 388.691 | 4 | 11.22 | 864204   | 11.33 | 948677  | 1.42602 |
| ESTATALR                   | Sin3A    | Sin3A, isoform D                            | 424.727 | 2 | 11.65 | 1476544  | 11.71 | 969884  | 0.85329 |
| FHLDDHLGGTSQTIHQR          | Sin3A    | Sin3A, isoform D                            | 654.657 | 3 | 23.08 | 1395287  | 23.06 | 756858  | 0.70465 |
| FHLDDHLGGTSQTIHQR          | Sin3A    | Sin3A, isoform D                            | 491.245 | 4 | 23.12 | 3523823  | 23.06 | 1769329 | 0.65225 |
| FLEILHDYQR                 | Sin3A    | Sin3A, isoform D                            | 445.235 | 3 | 35.73 | 2969216  | 35.43 | 0       | 0       |
| GTSHQSAAEYVQDVLSSCK        | Sin3A    | Sin3A, isoform D                            | 727.995 | 3 | 27.24 | 493988   | 27.08 | 189593  | 0.49857 |
| ILTPQHGGAQTIAYLPSTTPTATNLK | Sin3A    | Sin3A, isoform D                            | 898.82  | 3 | 35.8  | 4998395  | 35.62 | 5283785 | 1.37321 |
| LANPALGGGNTGR              | Sin3A    | Sin3A, isoform D                            | 627.831 | 2 | 17.75 | 10453019 | 17.75 | 7732981 | 0.96101 |
| LGASYCALPQSTVPK            | Sin3A    | Sin3A, isoform D                            | 796.411 | 2 | 28.68 | 1479395  | 28.59 | 1263101 | 1.10911 |
| LHAILCDR                   | Sin3A    | Sin3A, isoform D                            | 499.266 | 2 | 19.41 | 1985761  | 19.38 | 633888  | 0.41468 |
| MLTEQEVYTVQVAK             | Sin3A    | Sin3A, isoform D                            | 778.387 | 2 | 27.81 | 3209047  | 27.77 | 3556038 | 1.4395  |
| NDILFEK                    | Sin3A    | Sin3A, isoform D                            | 439.735 | 2 | 27.05 | 2341755  | 27.01 | 1764770 | 0.97897 |
| NPFVAVPIVLK                | Sin3A    | Sin3A, isoform D                            | 598.874 | 2 | 46.1  | 1222769  | 45.94 | 767794  | 0.81569 |
| QFVPDLFFAPR                | Sin3A    | Sin3A, isoform D                            | 668.856 | 2 | 50.52 | 6756025  | 50.25 | 7385320 | 1.42004 |
| SAHAAAIGNLSAVNTSVSIK       | Sin3A    | Sin3A, isoform D                            | 956.018 | 2 | 31.61 | 170248   | 31.53 | 254171  | 1.9394  |
| SAHAAAIGNLSAVNTSVSIK       | Sin3A    | Sin3A, isoform D                            | 637.681 | 3 | 31.61 | 2399426  | 31.53 | 2575551 | 1.39439 |
| SHCIDTPGVIER               | Sin3A    | Sin3A, isoform D                            | 692.338 | 2 | 20.25 | 307279   | 20.24 | 237394  | 1.0036  |
| SHCIDTPGVIER               | Sin3A    | Sin3A, isoform D                            | 461.894 | 3 | 20.22 | 598355   | 20.24 | 340785  | 0.73985 |
| SSPGISYATPPLPSGPHGQHNSGS   | Sin3A    | Sin3A, isoform D                            | 887.432 | 3 | 25.86 | 488181   | 25.83 | 202251  | 0.53819 |
| TILDDAANLLIHHVK            | Sin3A    | Sin3A, isoform D                            | 418.99  | 4 | 49.12 | 1380604  | 49.31 | 716808  | 0.67446 |
| TISGTQTVATAVGNLATISQQQPQVQ | Sin3A    | Sin3A, isoform D                            | 1041.89 | 3 | 45.65 | 3056186  | 45.35 | 3369934 | 1.4324  |
| TYNNNQQQQNHVIGSGLNATR      | Sin3A    | Sin3A, isoform D                            | 786.383 | 3 | 19.45 | 600429   | 19.45 | 504776  | 1.09209 |
| VLENLQK                    | Sin3A    | Sin3A, isoform D                            | 422.25  | 2 | 16.41 | 3516505  | 16.41 | 2648950 | 0.97855 |
| VTIELLDSEPEEVDKPAALK       | Sin3A    | Sin3A, isoform D                            | 732.726 | 3 | 39.02 | 4118678  | 38.81 | 3130918 | 0.9875  |
| YVGHPAPNQNLTGHNAK          | Sin3A    | Sin3A, isoform D                            | 619.975 | 3 | 10.09 | 210214   | 10.13 | 163530  | 1.01055 |
| GVDDLQQLDMPNQLVELMHRS      | RpS15    | Ribosomal protein S15, isoform B (SD21317p) | 846.421 | 3 | 56.93 | 2438393  | 56.76 | 3030472 | 1.61447 |
| GVDDLQQLDMPNQLVELMHRS      | RpS15    | Ribosomal protein S15, isoform B (SD21317p) | 851.753 | 3 | 52.82 | 1993202  | 52.51 | 2732090 | 1.7806  |
| GVDDLQQLDMPNQLVELMHRS      | RpS15    | Ribosomal protein S15, isoform B (SD21317p) | 857.084 | 3 | 46.75 | 939137   | 46.49 | 1012387 | 1.40036 |
| HGRPGIGATHSSR              | RpS15    | Ribosomal protein S15, isoform B (SD21317p) | 666.848 | 2 | 7.93  | 677685   | 8.06  | 679248  | 1.30204 |
| HGRPGIGATHSSR              | RpS15    | Ribosomal protein S15, isoform B (SD21317p) | 444.901 | 3 | 7.93  | 4672602  | 8.06  | 5517679 | 1.53398 |
| DTAALLEGYVLIIGLVPVEK       | hnRNP    | Uncharacterized protein, isoform B          | 1000.57 | 2 | 62.74 | 438531   | 62.45 | 679195  | 2.01195 |
| DTAALLEGYVLIIGLVPVEK       | hnRNP    | Uncharacterized protein, isoform B          | 667.382 | 3 | 62.73 | 263834   | 62.5  | 456206  | 2.24622 |
| NFILDQTNVYASAQR            | hnRNP    | Uncharacterized protein, isoform B          | 870.439 | 2 | 36.23 | 646640   | 36.09 | 453785  | 0.91161 |
| ALVPELTQQMFDK              | betaTub5 | Tubulin beta chain                          | 854.435 | 2 | 37.81 | 1590296  | 37.56 | 1317924 | 1.07655 |
| AVLVDLEPGTMDSVR            | betaTub5 | Tubulin beta chain                          | 801.414 | 2 | 39.24 | 2023515  | 39.04 | 2057238 | 1.32069 |
| AVLVDLEPGTMDSVR            | betaTub5 | Tubulin beta chain                          | 809.411 | 2 | 34.48 | 5552510  | 34.3  | 4552577 | 1.0651  |
| EAESCDCLQGFQLTHSLGGGTGSC   | betaTub5 | Tubulin beta chain                          | 1109.85 | 3 | 41.84 | 370508   | 41.64 | 177516  | 0.62239 |
| GHYTEGAELVDSVLDVVR         | betaTub5 | Tubulin beta chain                          | 653.665 | 3 | 50.34 | 2775420  | 50.24 | 1100574 | 0.51513 |
| IMNTYSVVPSPK               | betaTub5 | Tubulin beta chain                          | 668.352 | 2 | 29.06 | 1095355  | 28.94 | 858780  | 1.01847 |
| INVYYNEASGGK               | betaTub5 | Tubulin beta chain                          | 657.82  | 2 | 21.12 | 4330833  | 21.13 | 2405958 | 0.72167 |
| LAVNMVPPFR                 | betaTub5 | Tubulin beta chain                          | 572.321 | 2 | 40.41 | 1793279  | 40.19 | 932227  | 0.6753  |



|                           |                                                                                       |         |   |       |          |       |          |         |
|---------------------------|---------------------------------------------------------------------------------------|---------|---|-------|----------|-------|----------|---------|
| TLSDYNIQK                 | Ubi-p63E Ubiquitin-63E, isoform C (Ubiquitin-63E, isoform D)                          | 541.28  | 2 | 19.53 | 19914654 | 19.52 | 7860957  | 0.51277 |
| TLSDYNIQK                 | Ubi-p63E Ubiquitin-63E, isoform C (Ubiquitin-63E, isoform D)                          | 541.28  | 2 | 19.53 | 19914654 | 19.52 | 7860957  | 0.51277 |
| TLSDYNIQK                 | Ubi-p63E Ubiquitin-63E, isoform C (Ubiquitin-63E, isoform D)                          | 541.28  | 2 | 19.53 | 19914654 | 19.52 | 7860957  | 0.51277 |
| TLSDYNIQK                 | Ubi-p63E Ubiquitin-63E, isoform C (Ubiquitin-63E, isoform D)                          | 541.28  | 2 | 19.53 | 19914654 | 19.52 | 7860957  | 0.51277 |
| TLSDYNIQK                 | Ubi-p63E Ubiquitin-63E, isoform C (Ubiquitin-63E, isoform D)                          | 541.28  | 2 | 19.53 | 19914654 | 19.52 | 7860957  | 0.51277 |
| TLSDYNIQK                 | Ubi-p63E Ubiquitin-63E, isoform C (Ubiquitin-63E, isoform D)                          | 541.28  | 2 | 19.53 | 19914654 | 19.52 | 7860957  | 0.51277 |
| TLSDYNIQK                 | Ubi-p63E Ubiquitin-63E, isoform C (Ubiquitin-63E, isoform D)                          | 541.28  | 2 | 19.53 | 19914654 | 19.52 | 7860957  | 0.51277 |
| TLSDYNIQK                 | Ubi-p63E Ubiquitin-63E, isoform C (Ubiquitin-63E, isoform D)                          | 541.28  | 2 | 19.53 | 19914654 | 19.52 | 7860957  | 0.51277 |
| TLSDYNIQK                 | Ubi-p63E Ubiquitin-63E, isoform C (Ubiquitin-63E, isoform D)                          | 541.28  | 2 | 19.53 | 19914654 | 19.52 | 7860957  | 0.51277 |
| HVVEQVHEEQER              | Prm F103688p (Paramyosin, isoform B)                                                  | 506.915 | 3 | 9.49  | 191473   | 9.59  | 475223   | 3.22413 |
| HVVEQVHEEQER              | Prm Paramyosin, isoform D                                                             | 506.915 | 3 | 9.49  | 191473   | 9.59  | 475223   | 3.22413 |
| SGSGGSTGYVPTGRPR          | D1 D1 chromosomal protein, isoform C (D1 chromosomal protein, isoform D)              | 512.59  | 3 | 14.38 | 493054   | 14.31 | 732667   | 1.93034 |
| TAVETAILLR                | CCT3 T-complex protein 1 subunit gamma                                                | 600.372 | 2 | 46.75 | 1365542  | 46.61 | 617422   | 0.58735 |
| TLAQNGANTIR               | CCT3 T-complex protein 1 subunit gamma                                                | 659.83  | 2 | 15.65 | 496704   | 15.59 | 376804   | 0.98546 |
| GYAFVFTNTR                | Syp Syncrip, isoform F                                                                | 588.296 | 2 | 35.44 | 514118   | 35.33 | 604713   | 1.52795 |
| AAASIILR                  | CCT1 Chaperonin containing TCP1 subunit 1, isoform B                                  | 407.761 | 2 | 25.72 | 2915044  | 25.64 | 1149857  | 0.51241 |
| EQLAIAEFAK                | CCT1 Chaperonin containing TCP1 subunit 1, isoform B                                  | 560.306 | 2 | 35.24 | 3285457  | 35.02 | 1749112  | 0.69158 |
| FATEAAITLR                | CCT1 Chaperonin containing TCP1 subunit 1, isoform B                                  | 603.348 | 2 | 39.36 | 10718412 | 39.2  | 13176747 | 1.59698 |
| ICDELILIK                 | CCT1 Chaperonin containing TCP1 subunit 1, isoform B                                  | 616.334 | 2 | 39.17 | 3199977  | 38.93 | 2711421  | 1.10071 |
| IHPTSIISGYR               | CCT1 Chaperonin containing TCP1 subunit 1, isoform B                                  | 622.343 | 2 | 25.75 | 1934865  | 25.67 | 1766943  | 1.1863  |
| IIGADAEFFSAMVVDAAQSVK     | CCT1 Chaperonin containing TCP1 subunit 1, isoform B                                  | 723.701 | 3 | 60.05 | 1786490  | 59.91 | 2285436  | 1.66185 |
| IIGADAEFFSAMVVDAAQSVK     | CCT1 Chaperonin containing TCP1 subunit 1, isoform B                                  | 729.033 | 3 | 49.26 | 1206828  | 48.93 | 1391766  | 1.49811 |
| LLEVEHPAAK                | CCT1 Chaperonin containing TCP1 subunit 1, isoform B                                  | 553.814 | 2 | 17.76 | 1488962  | 17.76 | 1720402  | 1.50096 |
| LLEVEHPAAK                | CCT1 Chaperonin containing TCP1 subunit 1, isoform B                                  | 369.545 | 3 | 17.76 | 5109354  | 17.76 | 6443911  | 1.63835 |
| MLVDDIGDVTVTNDGATILR      | CCT1 Chaperonin containing TCP1 subunit 1, isoform B                                  | 1059.54 | 2 | 45.59 | 805671   | 45.35 | 784141   | 1.26433 |
| MLVDDIGDVTVTNDGATILR      | CCT1 Chaperonin containing TCP1 subunit 1, isoform B                                  | 1067.54 | 2 | 42.51 | 681498   | 42.29 | 684194   | 1.30418 |
| MLVDDIGDVTVTNDGATILR      | CCT1 Chaperonin containing TCP1 subunit 1, isoform B                                  | 712.028 | 3 | 42.51 | 590691   | 42.33 | 540350   | 1.18833 |
| SLLVIPK                   | CCT1 Chaperonin containing TCP1 subunit 1, isoform B                                  | 385.263 | 2 | 33.27 | 2316109  | 33.09 | 1393818  | 0.78175 |
| SSLGPVGLDK                | CCT1 Chaperonin containing TCP1 subunit 1, isoform B                                  | 486.772 | 2 | 24.74 | 2956948  | 24.72 | 3410829  | 1.49844 |
| SYHNSSQTKPER              | CCT1 Chaperonin containing TCP1 subunit 1, isoform B                                  | 717.342 | 2 | 6.8   | 51478    | 6.73  | 17702    | 0.44671 |
| SYHNSSQTKPER              | CCT1 Chaperonin containing TCP1 subunit 1, isoform B                                  | 478.564 | 3 | 6.8   | 142153   | 6.73  | 56320    | 0.51467 |
| TQNVMAALSISNIVK           | CCT1 Chaperonin containing TCP1 subunit 1, isoform B                                  | 794.94  | 2 | 46.95 | 1284833  | 46.68 | 1508805  | 1.52549 |
| TQNVMAALSISNIVK           | CCT1 Chaperonin containing TCP1 subunit 1, isoform B                                  | 802.937 | 2 | 39.73 | 2202017  | 39.48 | 2641875  | 1.55853 |
| VLVELAQLQDEEVGDGTTSSVILAA | CCT1 Chaperonin containing TCP1 subunit 1, isoform B                                  | 1018.23 | 3 | 65.61 | 1972773  | 65.17 | 0        | 0       |
| WTGLDLIEGVVR              | CCT1 Chaperonin containing TCP1 subunit 1, isoform B                                  | 679.377 | 2 | 53.01 | 1351754  | 52.71 | 645340   | 0.62017 |
| YFVEAGAMAVR               | CCT1 Chaperonin containing TCP1 subunit 1, isoform B                                  | 615.303 | 2 | 24.89 | 676486   | 24.87 | 566812   | 1.08844 |
| ALQASVLR                  | Ald1 Fructose-bisphosphate aldolase (EC 4.1.2.13)                                     | 429.264 | 2 | 22.24 | 109791   | 22.21 | 356378   | 4.21664 |
| IGGIGTVPVGR               | eEF1alph Elongation factor 1-alpha                                                    | 513.309 | 2 | 26.78 | 8471779  | 26.71 | 7294916  | 1.11858 |
| IHINIVVIGHVDSGK           | eEF1alph Elongation factor 1-alpha                                                    | 534.311 | 3 | 34.63 | 1881392  | 34.42 | 1040176  | 0.71821 |
| LPLQDVIYK                 | eEF1alph Elongation factor 1-alpha                                                    | 488.279 | 2 | 28.46 | 1429878  | 28.37 | 739398   | 0.67174 |
| STTTGHLIYK                | eEF1alph Elongation factor 1-alpha                                                    | 560.803 | 2 | 15.84 | 2355586  | 15.79 | 1523568  | 0.8402  |
| IAAEVAAPLAK               | Flo2 Flotillin 2, isoform F                                                           | 527.319 | 2 | 25.68 | 101116   | 25.6  | 592504   | 7.61191 |
| VYSPHVLNLTLDLPLGLTK       | shi Shibire, isoform F (Shibire, isoform G) (Shibire, isoform J)                      | 698.405 | 3 | 53.41 | 463587   | 53.25 | 477207   | 1.3372  |
| VYSPHVLNLTLDLPLGLTK       | shi Shibire, isoform C (Shibire, isoform E) (Shibire, isoform H) (Shibire, isoform I) | 698.405 | 3 | 53.41 | 463587   | 53.25 | 477207   | 1.3372  |
| AAEFNFR                   | wupA GH08696p (Wings up A, isoform F)                                                 | 427.711 | 2 | 24.96 | 9042040  | 24.95 | 9905750  | 1.42313 |
| GFMTPER                   | wupA GH08696p (Wings up A, isoform F)                                                 | 419.2   | 2 | 19.67 | 1284815  | 19.67 | 1246317  | 1.26012 |
| LGGVPVGVIAVETR            | ACC Acetyl-CoA carboxylase, isoform E (EC 6.4.1.2)                                    | 683.906 | 2 | 38.38 | 348778   | 38.27 | 503425   | 1.87503 |
| EYTAIEAK                  | Phb2 Prohibitin                                                                       | 498.256 | 2 | 17.18 | 20133    | 17.23 | 257332   | 16.6038 |
| IVQAEGEAAAK               | Phb2 Prohibitin                                                                       | 608.314 | 2 | 13.11 | 424400   | 13.11 | 493702   | 1.51116 |
| LGGIQSDIYSEGLHVR          | Phb2 Prohibitin                                                                       | 581.972 | 3 | 33.76 | 567085   | 33.65 | 472144   | 1.08156 |
| EYTAIEAK                  | Phb2 Prohibitin                                                                       | 498.256 | 2 | 17.18 | 20133    | 17.23 | 257332   | 16.6038 |
| IVQAEGEAAAK               | Phb2 Prohibitin                                                                       | 608.314 | 2 | 13.11 | 424400   | 13.11 | 493702   | 1.51116 |
| LGGIQSDIYSEGLHVR          | Phb2 Prohibitin                                                                       | 581.972 | 3 | 33.76 | 567085   | 33.65 | 472144   | 1.08156 |



|                            |           |                                                                         |         |   |       |          |       |          |         |
|----------------------------|-----------|-------------------------------------------------------------------------|---------|---|-------|----------|-------|----------|---------|
| AIYEQSR                    | hts       | Hu li tai shao, isoform P                                               | 433.722 | 2 | 11.43 | 989317   | 11.54 | 662957   | 0.87051 |
| DATVSQLQGDHVVMMGAASK       | hts       | Hu li tai shao, isoform P                                               | 636.293 | 3 | 17.09 | 884028   | 17.06 | 1039090  | 1.5269  |
| DGGAGASGILQQLSDIVGVPVSR    | hts       | Hu li tai shao, isoform P                                               | 1098.58 | 2 | 60.31 | 1852831  | 60.03 | 1591019  | 1.11548 |
| DGGAGASGILQQLSDIVGVPVSR    | hts       | Hu li tai shao, isoform P                                               | 732.725 | 3 | 60.31 | 7576074  | 60.03 | 5964562  | 1.02272 |
| FAAVAAEDGAATAEK            | hts       | Hu li tai shao, isoform P                                               | 746.868 | 2 | 24.97 | 13124    | 25.1  | 319707   | 31.6452 |
| LLDLYGWTQQLGAQITAR         | hts       | Hu li tai shao, isoform P                                               | 988.534 | 2 | 53.56 | 2279326  | 53.29 | 1565566  | 0.89225 |
| LLDLYGWTQQLGAQITAR         | hts       | Hu li tai shao, isoform P                                               | 659.358 | 3 | 53.56 | 1975907  | 53.25 | 1298057  | 0.85339 |
| LLPVGLDNLVLIPEESR          | hts       | Hu li tai shao, isoform P                                               | 626.363 | 3 | 55.71 | 938166   | 55.45 | 1069288  | 1.4806  |
| MLDNAGYR                   | hts       | Hu li tai shao, isoform P                                               | 470.221 | 2 | 16.11 | 947899   | 16.1  | 1485204  | 2.03538 |
| NDVELPPAVSSSLGYLLEEEELFR   | hts       | Hu li tai shao, isoform P                                               | 873.778 | 3 | 65.17 | 1366923  | 64.85 | 956167   | 0.90868 |
| SHFVLHSHVHAARPDIR          | hts       | Hu li tai shao, isoform P                                               | 486.02  | 4 | 24.42 | 11051    | 23.97 | 0        | 0       |
| SSNCMVPINDIR               | hts       | Hu li tai shao, isoform P                                               | 711.329 | 2 | 24.43 | 633585   | 24.05 | 1332102  | 2.73121 |
| SVHGEYTDTFSESEAVLQAGTK     | hts       | Hu li tai shao, isoform P                                               | 824.378 | 3 | 32.37 | 929683   | 32.29 | 1063232  | 1.48565 |
| TGLLPLTK                   | hts       | Hu li tai shao, isoform P                                               | 421.771 | 2 | 32.52 | 2862087  | 32.37 | 2725569  | 1.23708 |
| TGYIYR                     | hts       | Hu li tai shao, isoform P                                               | 386.703 | 2 | 16.34 | 1779020  | 16.29 | 796815   | 0.58183 |
| VEVLETGTPDPK               | hts       | Hu li tai shao, isoform P                                               | 642.838 | 2 | 23.08 | 3487670  | 23.1  | 2329013  | 0.86748 |
| DTAALLEGYVLIIGLVPVEK       | CG5477    | GH01011p                                                                | 1000.57 | 2 | 62.74 | 438531   | 62.45 | 679195   | 2.01195 |
| DTAALLEGYVLIIGLVPVEK       | CG5477    | GH01011p                                                                | 667.382 | 3 | 62.73 | 263834   | 62.5  | 456206   | 2.24622 |
| NFILDQTNVYASAQR            | CG5477    | GH01011p                                                                | 870.439 | 2 | 36.23 | 646640   | 36.09 | 453785   | 0.91161 |
| STISINVAGASLTR             | ens       | Ensconsin, isoform F                                                    | 682.362 | 2 | 25.86 | 816429   | 25.79 | 694557   | 1.10513 |
| GYAFVFTFNR                 | Syp       | Syncrip, isoform H                                                      | 588.296 | 2 | 35.44 | 514118   | 35.33 | 604713   | 1.52795 |
| HHDIDVVLIR                 | CG5028    | MIP04243p                                                               | 406.231 | 3 | 27.73 | 408874   | 27.61 | 208947   | 0.66385 |
| HHDIDVVLIR                 | CG5028    | Uncharacterized protein, isoform D (EC 1.1.1.41)                        | 406.231 | 3 | 27.73 | 408874   | 27.61 | 208947   | 0.66385 |
| FTILPHDFSIPTGELGPTLK       | bgm       | Bubblegum, isoform C (EC 6.2.1.3) (FI05443p)                            | 728.396 | 3 | 49.95 | 906351   | 49.6  | 472601   | 0.67736 |
| AIETFHGTQVHVESR            | ple       | FI04429p (Pale, isoform C) (EC 1.14.16.2)                               | 570.957 | 3 | 18.83 | 39913    | 18.92 | 134503   | 4.37764 |
| GNLQLIR                    | ple       | FI04429p (Pale, isoform C) (EC 1.14.16.2)                               | 463.793 | 2 | 37.15 | 0        | 41.79 | 173479   | #DIV/0! |
| YGDPIPFIDYSDVEVK           | ple       | FI04429p (Pale, isoform C) (EC 1.14.16.2)                               | 928.951 | 2 | 47.5  | 0        | 47.3  | 113828   | #DIV/0! |
| SIFSFPQQVK                 | prom      | Prominin, isoform D                                                     | 647.843 | 2 | 36.49 | 1196743  | 36.37 | 1335180  | 1.44931 |
| TLQEDQSIFR                 | prom      | Prominin, isoform D                                                     | 618.815 | 2 | 28.08 | 1390520  | 28.05 | 1856704  | 1.73455 |
| VALQIQDVATSSR              | prom      | Prominin, isoform D                                                     | 694.381 | 2 | 29.91 | 3286792  | 29.77 | 3985799  | 1.57531 |
| DTSFEQLVLR                 | FASN1     | Fatty acid synthase 1, isoform C (EC 1.-.-.) (EC 2.3.1.85) (EC 3.1.-.-) | 604.32  | 2 | 40.82 | 404038   | 40.66 | 103733   | 0.33352 |
| LALVGGIFNLAAVLR            | FASN1     | Fatty acid synthase 1, isoform C (EC 1.-.-.) (EC 2.3.1.85) (EC 3.1.-.-) | 763.974 | 2 | 64.23 | 79694    | 63.78 | 0        | 0       |
| NFDIVLSAQEIR               | FASN1     | Fatty acid synthase 1, isoform C (EC 1.-.-.) (EC 2.3.1.85) (EC 3.1.-.-) | 702.878 | 2 | 41.81 | 372388   | 41.64 | 404923   | 1.41253 |
| DITLFHAMNILHK              | MTA1-like | Metastasis associated 1-like, isoform C                                 | 518.282 | 3 | 43.88 | 2053379  | 43.78 | 955106   | 0.60423 |
| DLPNPLVQLADK               | MTA1-like | Metastasis associated 1-like, isoform C                                 | 661.869 | 2 | 44.73 | 4867516  | 44.55 | 2835007  | 0.7566  |
| ELTIPTQATSTIR              | MTA1-like | Metastasis associated 1-like, isoform C                                 | 772.438 | 2 | 37.83 | 11123584 | 37.63 | 12065403 | 1.40903 |
| HQPALDEER                  | MTA1-like | Metastasis associated 1-like, isoform C                                 | 547.765 | 2 | 10.77 | 1401862  | 10.88 | 390542   | 0.3619  |
| HYAQAHGIAISSGSPRPIMK       | MTA1-like | Metastasis associated 1-like, isoform C                                 | 531.031 | 4 | 22.34 | 2400440  | 22.14 | 3061997  | 1.65705 |
| HYAQAHGIAISSGSPRPIMK       | MTA1-like | Metastasis associated 1-like, isoform C                                 | 713.037 | 3 | 18.86 | 1475021  | 18.76 | 1372104  | 1.2084  |
| HYAQAHGIAISSGSPRPIMK       | MTA1-like | Metastasis associated 1-like, isoform C                                 | 535.03  | 4 | 18.86 | 8277828  | 18.73 | 11433715 | 1.79429 |
| IDQFLVVSR                  | MTA1-like | Metastasis associated 1-like, isoform C                                 | 538.809 | 2 | 33.15 | 2031489  | 33.09 | 2200379  | 1.40704 |
| ILSAVDLR                   | MTA1-like | Metastasis associated 1-like, isoform C                                 | 443.771 | 2 | 29.06 | 3480815  | 28.94 | 3278001  | 1.22335 |
| LCLSCWEYWR                 | MTA1-like | Metastasis associated 1-like, isoform C                                 | 736.826 | 2 | 45.03 | 1100791  | 44.85 | 1003854  | 1.18464 |
| LGAPGSGPHEWLVLTPK          | MTA1-like | Metastasis associated 1-like, isoform C                                 | 586.989 | 3 | 38.45 | 4162383  | 38.27 | 5011628  | 1.56408 |
| LLLLKPK                    | MTA1-like | Metastasis associated 1-like, isoform C                                 | 412.802 | 2 | 25.48 | 7404797  | 25.43 | 7870932  | 1.38081 |
| QIIIEYYMWK                 | MTA1-like | Metastasis associated 1-like, isoform C                                 | 718.85  | 2 | 43.1  | 621851   | 42.87 | 464183   | 0.96967 |
| QPSLHMSAAAASR              | MTA1-like | Metastasis associated 1-like, isoform C                                 | 448.223 | 3 | 11.24 | 631709   | 11.36 | 455066   | 0.93579 |
| QSAYAINAMLVK               | MTA1-like | Metastasis associated 1-like, isoform C                                 | 654.853 | 2 | 35.58 | 1490566  | 35.41 | 2100155  | 1.8303  |
| QSAYAINAMLVK               | MTA1-like | Metastasis associated 1-like, isoform C                                 | 662.85  | 2 | 29.32 | 5849027  | 29.21 | 6763609  | 1.50216 |
| QVESIPATQIR                | MTA1-like | Metastasis associated 1-like, isoform C                                 | 621.346 | 2 | 23.95 | 29583954 | 23.96 | 39601180 | 1.7389  |
| SIGTFAR                    | MTA1-like | Metastasis associated 1-like, isoform C                                 | 376.208 | 2 | 18.93 | 21987752 | 18.88 | 27082934 | 1.60006 |
| SSQWNSVSSGHSTSR            | MTA1-like | Metastasis associated 1-like, isoform C                                 | 536.245 | 3 | 13.07 | 1701975  | 13.07 | 2157652  | 1.64684 |
| SSSAASTPTATLAGLATTPTAVVDLI | MTA1-like | Metastasis associated 1-like, isoform C                                 | 968.816 | 3 | 46.62 | 1694407  | 46.37 | 1458500  | 1.11818 |

|                          |                                                                                        |         |   |       |          |       |          |         |
|--------------------------|----------------------------------------------------------------------------------------|---------|---|-------|----------|-------|----------|---------|
| TAFYLHTNPMT              | MTA1-like Metastasis associated 1-like, isoform C                                      | 726.359 | 2 | 28.65 | 3357775  | 28.53 | 4332503  | 1.67614 |
| TAFYLHTNPMT              | MTA1-like Metastasis associated 1-like, isoform C                                      | 484.575 | 3 | 28.65 | 6289877  | 28.53 | 6959267  | 1.43729 |
| TAFYLHTNPMT              | MTA1-like Metastasis associated 1-like, isoform C                                      | 734.356 | 2 | 22.69 | 3508484  | 22.72 | 3475736  | 1.28691 |
| TAFYLHTNPMT              | MTA1-like Metastasis associated 1-like, isoform C                                      | 489.906 | 3 | 22.69 | 11884596 | 22.72 | 15231011 | 1.66482 |
| TLPIKPAAPEPSSRPIESQIVILD | MTA1-like Metastasis associated 1-like, isoform C                                      | 857.818 | 3 | 41.39 | 34286420 | 41.22 | 42519524 | 1.61097 |
| VMCFYR                   | MTA1-like Metastasis associated 1-like, isoform C                                      | 446.196 | 2 | 18.26 | 2536584  | 18.3  | 3037729  | 1.55569 |
| YQCDIPAK                 | MTA1-like Metastasis associated 1-like, isoform C                                      | 497.737 | 2 | 14.9  | 10434692 | 14.9  | 5215218  | 0.64925 |
| AQELWELIVK               | up MIP03205p (Upheld, isoform M)                                                       | 614.85  | 2 | 48.34 | 857786   | 48.15 | 594529   | 0.90036 |
| DAGLGLSSAAMER            | up MIP03205p (Upheld, isoform M)                                                       | 647.309 | 2 | 23.24 | 1496095  | 23.26 | 1558348  | 1.35309 |
| IKPLAIEGFGAEK            | up MIP03205p (Upheld, isoform M)                                                       | 458.266 | 3 | 33.5  | 4523125  | 33.37 | 3961091  | 1.13762 |
| ISLSFR                   | up MIP03205p (Upheld, isoform M)                                                       | 361.713 | 2 | 30.22 | 1860854  | 30.16 | 1791066  | 1.25032 |
| AIYDHHYSR                | Mf MIP03096p (Myofilin, isoform K) (Myofilin, isoform P)                               | 581.275 | 2 | 11.31 | 475566   | 11.41 | 651391   | 1.77932 |
| AIYDHHYSR                | Mf MIP03096p (Myofilin, isoform K) (Myofilin, isoform P)                               | 387.853 | 3 | 11.31 | 2895978  | 11.41 | 4746762  | 2.12924 |
| ASRPYSSYLDSPSYR          | Mf MIP03096p (Myofilin, isoform K) (Myofilin, isoform P)                               | 874.916 | 2 | 25.08 | 1194562  | 25.03 | 1397150  | 1.51935 |
| ASRPYSSYLDSPSYR          | Mf MIP03096p (Myofilin, isoform K) (Myofilin, isoform P)                               | 583.613 | 3 | 25.12 | 5487893  | 25.03 | 8501748  | 2.01245 |
| DTYGYSPR                 | Mf MIP03096p (Myofilin, isoform K) (Myofilin, isoform P)                               | 479.717 | 2 | 14.86 | 2640775  | 14.83 | 2840777  | 1.39742 |
| FWQSYIR                  | Mf MIP03096p (Myofilin, isoform K) (Myofilin, isoform P)                               | 500.256 | 2 | 32.37 | 739255   | 32.25 | 1687659  | 2.9656  |
| NHLEMIGR                 | Mf MIP03096p (Myofilin, isoform K) (Myofilin, isoform P)                               | 493.248 | 2 | 12.87 | 1554021  | 12.91 | 1080925  | 0.90357 |
| SIYDEPATANER             | Mf MIP03096p (Myofilin, isoform K) (Myofilin, isoform P)                               | 683.318 | 2 | 18.42 | 9216683  | 18.42 | 15046478 | 2.12072 |
| AGSEPYVPPPSYWNR          | Mf MIP06826p (Myofilin, isoform F) (Myofilin, isoform J)                               | 860.41  | 2 | 33.23 | 748487   | 33.06 | 1566838  | 2.71933 |
| AIYDHHYSR                | Mf MIP06826p (Myofilin, isoform F) (Myofilin, isoform J)                               | 581.275 | 2 | 11.31 | 475566   | 11.41 | 651391   | 1.77932 |
| AIYDHHYSR                | Mf MIP06826p (Myofilin, isoform F) (Myofilin, isoform J)                               | 387.853 | 3 | 11.31 | 2895978  | 11.41 | 4746762  | 2.12924 |
| ASRPYSSYLDSPSYR          | Mf MIP06826p (Myofilin, isoform F) (Myofilin, isoform J)                               | 874.916 | 2 | 25.08 | 1194562  | 25.03 | 1397150  | 1.51935 |
| ASRPYSSYLDSPSYR          | Mf MIP06826p (Myofilin, isoform F) (Myofilin, isoform J)                               | 583.613 | 3 | 25.12 | 5487893  | 25.03 | 8501748  | 2.01245 |
| ASSLEPLDELFER            | Mf MIP06826p (Myofilin, isoform F) (Myofilin, isoform J)                               | 753.378 | 2 | 48.45 | 4498040  | 48.19 | 5102070  | 1.47348 |
| DKPLTPNSLVPLEYEPEDK      | Mf MIP06826p (Myofilin, isoform F) (Myofilin, isoform J)                               | 728.707 | 3 | 38.98 | 567161   | 38.81 | 728559   | 1.66871 |
| DSYLSPVK                 | Mf MIP06826p (Myofilin, isoform F) (Myofilin, isoform J)                               | 454.74  | 2 | 22.04 | 1523720  | 22.02 | 1430945  | 1.21994 |
| DTYGYSPR                 | Mf MIP06826p (Myofilin, isoform F) (Myofilin, isoform J)                               | 479.717 | 2 | 14.86 | 2640775  | 14.83 | 2840777  | 1.39742 |
| FWQSYIR                  | Mf MIP06826p (Myofilin, isoform F) (Myofilin, isoform J)                               | 500.256 | 2 | 32.37 | 739255   | 32.25 | 1687659  | 2.9656  |
| GGSPVDFDR                | Mf MIP06826p (Myofilin, isoform F) (Myofilin, isoform J)                               | 417.709 | 2 | 19.86 | 5727839  | 19.85 | 7157511  | 1.62328 |
| LLAELNK                  | Mf MIP06826p (Myofilin, isoform F) (Myofilin, isoform J)                               | 400.747 | 2 | 22.38 | 846200   | 22.35 | 1253332  | 1.92405 |
| LPIFHPR                  | Mf MIP06826p (Myofilin, isoform F) (Myofilin, isoform J)                               | 440.264 | 2 | 24.47 | 512417   | 24.48 | 315832   | 0.80067 |
| NHLEMIGR                 | Mf MIP06826p (Myofilin, isoform F) (Myofilin, isoform J)                               | 493.248 | 2 | 12.87 | 1554021  | 12.91 | 1080925  | 0.90357 |
| SASPFRRPAR               | Mf MIP06826p (Myofilin, isoform F) (Myofilin, isoform J)                               | 494.77  | 2 | 13.46 | 1272464  | 13.42 | 1443660  | 1.47381 |
| SIYDEPATANER             | Mf MIP06826p (Myofilin, isoform F) (Myofilin, isoform J)                               | 683.318 | 2 | 18.42 | 9216683  | 18.42 | 15046478 | 2.12072 |
| YGLYLIR                  | Mf MIP06826p (Myofilin, isoform F) (Myofilin, isoform J)                               | 392.721 | 2 | 28.26 | 5499678  | 28.16 | 8903475  | 2.10303 |
| IIGEYGLR                 | RpS9 LD13662p (Ribosomal protein S9, isoform E)                                        | 460.764 | 2 | 25.97 | 1566590  | 25.94 | 2123615  | 1.76093 |
| LFQGNALLR                | RpS9 LD13662p (Ribosomal protein S9, isoform E)                                        | 516.303 | 2 | 32.83 | 1000199  | 32.72 | 375882   | 0.48819 |
| ILDLEEEVYEINAEQQFLLLR    | Lint-1 IP16414p (L(3)mbt interacting protein 1, isoform C) (L(3)mbt interacting protei | 902.801 | 3 | 61.89 | 784107   | 61.7  | 561166   | 0.92969 |
| LNDSLQEFVSK              | Lint-1 IP16414p (L(3)mbt interacting protein 1, isoform C) (L(3)mbt interacting protei | 640.33  | 2 | 31.72 | 1131452  | 31.63 | 1444369  | 1.6583  |
| TQPEEYQGETFLGLFELYSPEVLK | Lint-1 IP16414p (L(3)mbt interacting protein 1, isoform C) (L(3)mbt interacting protei | 939.8   | 3 | 64.56 | 308483   | 64.3  | 525500   | 2.21291 |
| TVQNASGVDFHYGQQLNAVDALVM | Lint-1 IP16414p (L(3)mbt interacting protein 1, isoform C) (L(3)mbt interacting protei | 969.147 | 3 | 46.58 | 2486428  | 46.37 | 2112926  | 1.1039  |
| APAAGIDLGTTYSVGVFQHGK    | Hsc70-4 Heat shock protein cognate 4, isoform G (EC 3.6.1.3) (LD25749p)                | 759.716 | 3 | 40.45 | 5148820  | 40.23 | 3011430  | 0.75978 |
| ATLDEDNLK                | Hsc70-4 Heat shock protein cognate 4, isoform G (EC 3.6.1.3) (LD25749p)                | 509.756 | 2 | 17.44 | 12568892 | 17.45 | 9571772  | 0.98928 |
| DAGTIAGLNVLR             | Hsc70-4 Heat shock protein cognate 4, isoform G (EC 3.6.1.3) (LD25749p)                | 600.341 | 2 | 38.18 | 41262500 | 38.03 | 54952584 | 1.73004 |
| ELEGVCNPIITK             | Hsc70-4 Heat shock protein cognate 4, isoform G (EC 3.6.1.3) (LD25749p)                | 686.861 | 2 | 30.64 | 3930112  | 30.51 | 6693284  | 2.21236 |
| ETAEAYLGK                | Hsc70-4 Heat shock protein cognate 4, isoform G (EC 3.6.1.3) (LD25749p)                | 491.248 | 2 | 18.78 | 1276400  | 18.74 | 1203743  | 1.22509 |
| FELNADLFR                | Hsc70-4 Heat shock protein cognate 4, isoform G (EC 3.6.1.3) (LD25749p)                | 627.312 | 2 | 40.11 | 5534845  | 39.92 | 4957492  | 1.16353 |
| FELSGIPPAPR              | Hsc70-4 Heat shock protein cognate 4, isoform G (EC 3.6.1.3) (LD25749p)                | 592.327 | 2 | 35.41 | 8081636  | 34.58 | 6361236  | 1.0225  |
| HWPFEVVSADGKPK           | Hsc70-4 Heat shock protein cognate 4, isoform G (EC 3.6.1.3) (LD25749p)                | 532.944 | 3 | 32.25 | 1810179  | 32.17 | 1759279  | 1.26251 |
| LLQDLFNGK                | Hsc70-4 Heat shock protein cognate 4, isoform G (EC 3.6.1.3) (LD25749p)                | 524.295 | 2 | 37.39 | 815568   | 37.18 | 536116   | 0.85393 |
| LVTHFVQEFK               | Hsc70-4 Heat shock protein cognate 4, isoform G (EC 3.6.1.3) (LD25749p)                | 416.564 | 3 | 29.17 | 6951855  | 29.06 | 4441078  | 0.82987 |
| NQVAMNPTQTIFDAK          | Hsc70-4 Heat shock protein cognate 4, isoform G (EC 3.6.1.3) (LD25749p)                | 839.417 | 2 | 35.8  | 3572564  | 35.58 | 4997890  | 1.81731 |

|                             |           |                                                                                    |         |   |       |          |       |          |         |
|-----------------------------|-----------|------------------------------------------------------------------------------------|---------|---|-------|----------|-------|----------|---------|
| NQVAMNPTQTIFDAK             | Hsc70-4   | Heat shock protein cognate 4, isoform G (EC 3.6.1.3) (LD25749p)                    | 847.414 | 2 | 30.99 | 17359498 | 30.83 | 24582760 | 1.83957 |
| NVLIFDLGGGTFDVSILSIDDGIFEV  | Hsc70-4   | Heat shock protein cognate 4, isoform G (EC 3.6.1.3) (LD25749p)                    | 961.839 | 3 | 65.61 | 296742   | 65.62 | 318618   | 1.39481 |
| QTQTFTTYSNDNPGVLIQVYEGER    | Hsc70-4   | Heat shock protein cognate 4, isoform G (EC 3.6.1.3) (LD25749p)                    | 925.447 | 3 | 42.59 | 6743949  | 42.36 | 8544964  | 1.64596 |
| SINPDEAVAYGAAVQAAIHLHGDK    | Hsc70-4   | Heat shock protein cognate 4, isoform G (EC 3.6.1.3) (LD25749p)                    | 770.729 | 3 | 49.12 | 5844145  | 48.87 | 6076260  | 1.35063 |
| STAGDTHLGGEDFDNR            | Hsc70-4   | Heat shock protein cognate 4, isoform G (EC 3.6.1.3) (LD25749p)                    | 846.366 | 2 | 18.67 | 1657789  | 18.65 | 1831600  | 1.43524 |
| STAGDTHLGGEDFDNR            | Hsc70-4   | Heat shock protein cognate 4, isoform G (EC 3.6.1.3) (LD25749p)                    | 564.58  | 3 | 18.67 | 10781481 | 18.68 | 14815577 | 1.7851  |
| SVIHDIVLVGGSTR              | Hsc70-4   | Heat shock protein cognate 4, isoform G (EC 3.6.1.3) (LD25749p)                    | 726.912 | 2 | 33.42 | 16676664 | 33.29 | 17014050 | 1.32532 |
| SVIHDIVLVGGSTR              | Hsc70-4   | Heat shock protein cognate 4, isoform G (EC 3.6.1.3) (LD25749p)                    | 484.944 | 3 | 33.42 | 25909346 | 33.29 | 28104442 | 1.4091  |
| TFPPEEISSMVLTK              | Hsc70-4   | Heat shock protein cognate 4, isoform G (EC 3.6.1.3) (LD25749p)                    | 814.916 | 2 | 50.99 | 8350954  | 50.71 | 10307238 | 1.60335 |
| TFPPEEISSMVLTK              | Hsc70-4   | Heat shock protein cognate 4, isoform G (EC 3.6.1.3) (LD25749p)                    | 543.613 | 3 | 50.99 | 1053530  | 50.71 | 1236310  | 1.52441 |
| TFPPEEISSMVLTK              | Hsc70-4   | Heat shock protein cognate 4, isoform G (EC 3.6.1.3) (LD25749p)                    | 822.913 | 2 | 44.06 | 1805317  | 44.17 | 2932806  | 2.11034 |
| TFPPEEISSMVLTK              | Hsc70-4   | Heat shock protein cognate 4, isoform G (EC 3.6.1.3) (LD25749p)                    | 548.944 | 3 | 43.99 | 365196   | 44.13 | 736202   | 2.61875 |
| TLSSSTQASIEIDSLFEGTDFYTSITF | Hsc70-4   | Heat shock protein cognate 4, isoform G (EC 3.6.1.3) (LD25749p)                    | 990.48  | 3 | 57.43 | 13069925 | 57.18 | 15772457 | 1.56765 |
| TPPSYVAFTDTER               | Hsc70-4   | Heat shock protein cognate 4, isoform G (EC 3.6.1.3) (LD25749p)                    | 744.354 | 2 | 29.29 | 49722228 | 29.17 | 61082460 | 1.59584 |
| TVTNAVITVPAYFNDSQR          | Hsc70-4   | Heat shock protein cognate 4, isoform G (EC 3.6.1.3) (LD25749p)                    | 998.51  | 2 | 40.66 | 11484469 | 40.5  | 14976923 | 1.69408 |
| TVTNAVITVPAYFNDSQR          | Hsc70-4   | Heat shock protein cognate 4, isoform G (EC 3.6.1.3) (LD25749p)                    | 666.009 | 3 | 40.66 | 13980052 | 40.46 | 17266742 | 1.60444 |
| VEIANDQGNR                  | Hsc70-4   | Heat shock protein cognate 4, isoform G (EC 3.6.1.3) (LD25749p)                    | 614.818 | 2 | 18.24 | 20421124 | 18.27 | 30231408 | 1.9231  |
| ALVDVLR                     | Rm62      | LP18603p (Rm62, isoform I)                                                         | 393.248 | 2 | 32.4  | 917820   | 32.25 | 781548   | 1.10617 |
| EANQCHINPALENLAR            | Rm62      | LP18603p (Rm62, isoform I)                                                         | 841.429 | 2 | 32.48 | 1286441  | 32.37 | 785963   | 0.79366 |
| ELAQQIQQVATEFGSSSYVR        | Rm62      | LP18603p (Rm62, isoform I)                                                         | 747.71  | 3 | 48.34 | 417102   | 48.12 | 508191   | 1.58273 |
| FGGGGGFGDR                  | Rm62      | LP18603p (Rm62, isoform I)                                                         | 463.709 | 2 | 17.67 | 571805   | 17.72 | 448173   | 1.01817 |
| NTCVFGGAPK                  | Rm62      | LP18603p (Rm62, isoform I)                                                         | 525.755 | 2 | 19.91 | 235668   | 19.91 | 262752   | 1.44833 |
| SNILVATDVAAAR               | Rm62      | LP18603p (Rm62, isoform I)                                                         | 615.346 | 2 | 29.95 | 1490640  | 29.85 | 1916326  | 1.67001 |
| YVINFDYPQNSEDIYHR           | Rm62      | LP18603p (Rm62, isoform I)                                                         | 725.004 | 3 | 37.84 | 686584   | 37.79 | 447734   | 0.84713 |
| ALQASVLR                    | Ald1      | Fructose-bisphosphate aldolase (EC 4.1.2.13)                                       | 429.264 | 2 | 22.24 | 109791   | 22.21 | 356378   | 4.21664 |
| IAAEVAAPLAK                 | Flo2      | Flo-2-PD (Flo-2-PH) (Flotillin 2, isoform H) (GH22754p)                            | 527.319 | 2 | 25.68 | 101116   | 25.6  | 592504   | 7.61191 |
| ILESGCHVVVGTGPR             | eIF4A     | Eukaryotic translation initiation factor 4A, isoform E (EC 2.7.7.-) (EC 3.6.1.3) ( | 527.612 | 3 | 22.54 | 32536    | 22.6  | 97954    | 3.91093 |
| LGTLCDLYDITLSITQSVIFCNR     | eIF4A     | Eukaryotic translation initiation factor 4A, isoform E (EC 2.7.7.-) (EC 3.6.1.3) ( | 897.444 | 3 | 65.14 | 15710    | 65.03 | 0        | 0       |
| VLITDILLAR                  | eIF4A     | Eukaryotic translation initiation factor 4A, isoform E (EC 2.7.7.-) (EC 3.6.1.3) ( | 557.845 | 2 | 40.07 | 957169   | 39.92 | 1532706  | 2.08014 |
| ISGATTFDFIPQK               | CaMKII    | Calcium/calmodulin-dependent protein kinase II, isoform I (EC 2.7.11.-) (EC 2      | 712.875 | 2 | 38.6  | 1118955  | 38.42 | 1549927  | 1.79937 |
| ISGATTFDFIPQK               | CaMKII    | Calcium/calmodulin-dependent protein kinase II, isoform J (EC 2.7.11.-) (EC 2      | 712.875 | 2 | 38.6  | 1118955  | 38.42 | 1549927  | 1.79937 |
| LLEANPNYSK                  | mfas      | MIP15217p (Midline fasciclin, isoform Q)                                           | 574.801 | 2 | 18.6  | 422357   | 18.57 | 399268   | 1.22802 |
| LNLYSTHALFSDVMNR            | mfas      | MIP15217p (Midline fasciclin, isoform Q)                                           | 632.981 | 3 | 38.73 | 372398   | 38.45 | 772695   | 2.6954  |
| SAGLTPDLSNFTETR             | sbb       | Scribbler, isoform G                                                               | 804.897 | 2 | 36.67 | 741872   | 36.56 | 971672   | 1.70143 |
| TSPFGFSGVGAASSK             | sbb       | Scribbler, isoform G                                                               | 704.857 | 2 | 24.77 | 1117813  | 24.76 | 1320748  | 1.53488 |
| DTAALLEGYVLIGLVPVEK         | CG18610   | Uncharacterized protein, isoform C                                                 | 1000.57 | 2 | 62.74 | 438531   | 62.45 | 679195   | 2.01195 |
| DTAALLEGYVLIGLVPVEK         | CG18610   | Uncharacterized protein, isoform C                                                 | 667.382 | 3 | 62.73 | 263834   | 62.5  | 456206   | 2.24622 |
| NFILDQTNVYASAQR             | CG18610   | Uncharacterized protein, isoform C                                                 | 870.439 | 2 | 36.23 | 646640   | 36.09 | 453785   | 0.91161 |
| ILIPSSIAGAVIGK              | HnRNP-K   | Heterogeneous nuclear ribonucleoprotein K, isoform E                               | 669.921 | 2 | 46.3  | 366013   | 46.1  | 1322236  | 4.69283 |
| NFPALTYFR                   | I(2)01289 | Lethal (2) 01289, isoform J                                                        | 564.795 | 2 | 42.88 | 433584   | 42.79 | 472450   | 1.41548 |
| NFPALTYFR                   | I(2)01289 | Lethal (2) 01289, isoform F                                                        | 564.795 | 2 | 42.88 | 433584   | 42.79 | 472450   | 1.41548 |
| NFPALTYFR                   | I(2)01289 | Lethal (2) 01289, isoform G                                                        | 564.795 | 2 | 42.88 | 433584   | 42.79 | 472450   | 1.41548 |
| DFYQIR                      | CG1620    | Uncharacterized protein, isoform B                                                 | 421.214 | 2 | 25.63 | 4058468  | 25.64 | 3651345  | 1.16873 |
| DNEQALHLLVQCQGYDFK          | CG1620    | Uncharacterized protein, isoform B                                                 | 683.995 | 3 | 42.88 | 848275   | 42.64 | 432717   | 0.66266 |
| ERPLPADRPSK                 | CG1620    | Uncharacterized protein, isoform B                                                 | 422.57  | 3 | 9.9   | 322262   | 10.02 | 407848   | 1.64404 |
| SHLLDLYPDESFDLAPTCGEETEF    | CG1620    | Uncharacterized protein, isoform B                                                 | 965.111 | 3 | 46.58 | 8771567  | 46.33 | 5071262  | 0.75104 |
| SSDHSQHSASEASADSGSLANSDL    | CG1620    | Uncharacterized protein, isoform B                                                 | 740.089 | 4 | 22.78 | 177697   | 22.79 | 299818   | 2.19179 |
| YGGTAASPAMSSSNR             | CG1620    | Uncharacterized protein, isoform B                                                 | 728.828 | 2 | 13.99 | 2532481  | 13.97 | 2794880  | 1.43364 |
| YGGTAASPAMSSSNR             | CG1620    | Uncharacterized protein, isoform B                                                 | 736.825 | 2 | 10.01 | 2951260  | 10.18 | 1942943  | 0.85521 |
| VFLGGLPSNVTETDLR            | Hrb27C    | Heterogeneous nuclear ribonucleoprotein at 27C, isoform D (Heterogeneous n         | 859.46  | 2 | 41.76 | 616996   | 41.61 | 670475   | 1.41164 |
| ALDSMQASLEAEAK              | Mhc       | Myosin heavy chain, isoform O (EC 3.6.1.3)                                         | 732.356 | 2 | 29.64 | 321135   | 29.49 | 790332   | 3.19701 |
| ALDSMQASLEAEAK              | Mhc       | Myosin heavy chain, isoform O (EC 3.6.1.3)                                         | 740.353 | 2 | 21.04 | 48359    | 20.88 | 260236   | 6.99057 |
| DLEEANIQHESLANLR            | Mhc       | Myosin heavy chain, isoform O (EC 3.6.1.3)                                         | 651.661 | 3 | 31.08 | 667254   | 31    | 1249882  | 2.43333 |

|                     |         |                                            |         |   |       |         |       |         |         |
|---------------------|---------|--------------------------------------------|---------|---|-------|---------|-------|---------|---------|
| GALQDYQER           | Mhc     | Myosin heavy chain, isoform O (EC 3.6.1.3) | 540.259 | 2 | 15.57 | 503772  | 15.55 | 1324414 | 3.41517 |
| IEEEEEVEAER         | Mhc     | Myosin heavy chain, isoform O (EC 3.6.1.3) | 737.849 | 2 | 27.66 | 871072  | 27.57 | 2436877 | 3.63414 |
| LAAEETIESLNQK       | Mhc     | Myosin heavy chain, isoform O (EC 3.6.1.3) | 787.899 | 2 | 29.52 | 307761  | 29.44 | 1119309 | 4.72453 |
| LAGADIETYLLEK       | Mhc     | Myosin heavy chain, isoform O (EC 3.6.1.3) | 718.388 | 2 | 42.99 | 649408  | 42.76 | 1212276 | 2.42497 |
| LTQEAVADLER         | Mhc     | Myosin heavy chain, isoform O (EC 3.6.1.3) | 622.828 | 2 | 25.2  | 753282  | 25.18 | 1645891 | 2.83835 |
| NYSTELFR            | Mhc     | Myosin heavy chain, isoform O (EC 3.6.1.3) | 515.254 | 2 | 28.61 | 584482  | 28.59 | 1201453 | 2.67029 |
| QIEEAEI AALNLA K    | Mhc     | Myosin heavy chain, isoform O (EC 3.6.1.3) | 821.438 | 2 | 39.84 | 244676  | 39.61 | 641209  | 3.40432 |
| QLEEAESQVSQLSK      | Mhc     | Myosin heavy chain, isoform O (EC 3.6.1.3) | 788.397 | 2 | 24.66 | 238416  | 24.6  | 763584  | 4.16048 |
| TALLDLSLGEK         | Mhc     | Myosin heavy chain, isoform O (EC 3.6.1.3) | 567.306 | 2 | 31.71 | 635833  | 31.55 | 1551318 | 3.16942 |
| TLLEQADR            | Mhc     | Myosin heavy chain, isoform O (EC 3.6.1.3) | 473.254 | 2 | 18.74 | 809820  | 18.73 | 1724785 | 2.76674 |
| VIAYFATVGASK        | Mhc     | Myosin heavy chain, isoform O (EC 3.6.1.3) | 613.843 | 2 | 33.65 | 620379  | 33.48 | 1435185 | 3.0052  |
| ALDSMQASLEAEAK      | Mhc     | Myosin heavy chain, isoform N (EC 3.6.1.3) | 732.356 | 2 | 29.64 | 321135  | 29.49 | 790332  | 3.19701 |
| ALDSMQASLEAEAK      | Mhc     | Myosin heavy chain, isoform N (EC 3.6.1.3) | 740.353 | 2 | 21.04 | 48359   | 20.88 | 260236  | 6.99057 |
| DLEEANIQHESHLANLR   | Mhc     | Myosin heavy chain, isoform N (EC 3.6.1.3) | 651.661 | 3 | 31.08 | 667254  | 31    | 1249882 | 2.43333 |
| GALQDYQER           | Mhc     | Myosin heavy chain, isoform N (EC 3.6.1.3) | 540.259 | 2 | 15.57 | 503772  | 15.55 | 1324414 | 3.41517 |
| IEEEEEVEAER         | Mhc     | Myosin heavy chain, isoform N (EC 3.6.1.3) | 737.849 | 2 | 27.66 | 871072  | 27.57 | 2436877 | 3.63414 |
| LAAEETIESLNQK       | Mhc     | Myosin heavy chain, isoform N (EC 3.6.1.3) | 787.899 | 2 | 29.52 | 307761  | 29.44 | 1119309 | 4.72453 |
| LAGADIETYLLEK       | Mhc     | Myosin heavy chain, isoform N (EC 3.6.1.3) | 718.388 | 2 | 42.99 | 649408  | 42.76 | 1212276 | 2.42497 |
| LTQEAVADLER         | Mhc     | Myosin heavy chain, isoform N (EC 3.6.1.3) | 622.828 | 2 | 25.2  | 753282  | 25.18 | 1645891 | 2.83835 |
| NYSTELFR            | Mhc     | Myosin heavy chain, isoform N (EC 3.6.1.3) | 515.254 | 2 | 28.61 | 584482  | 28.59 | 1201453 | 2.67029 |
| QIEEAEI AALNLA K    | Mhc     | Myosin heavy chain, isoform N (EC 3.6.1.3) | 821.438 | 2 | 39.84 | 244676  | 39.61 | 641209  | 3.40432 |
| QLEEAESQVSQLSK      | Mhc     | Myosin heavy chain, isoform N (EC 3.6.1.3) | 788.397 | 2 | 24.66 | 238416  | 24.6  | 763584  | 4.16048 |
| TALLDLSLGEK         | Mhc     | Myosin heavy chain, isoform N (EC 3.6.1.3) | 567.306 | 2 | 31.71 | 635833  | 31.55 | 1551318 | 3.16942 |
| TLLEQADR            | Mhc     | Myosin heavy chain, isoform N (EC 3.6.1.3) | 473.254 | 2 | 18.74 | 809820  | 18.73 | 1724785 | 2.76674 |
| VIAYFATVGASK        | Mhc     | Myosin heavy chain, isoform N (EC 3.6.1.3) | 613.843 | 2 | 33.65 | 620379  | 33.48 | 1435185 | 3.0052  |
| ALDSMQASLEAEAK      | Mhc     | Myosin heavy chain, isoform P (EC 3.6.1.3) | 732.356 | 2 | 29.64 | 321135  | 29.49 | 790332  | 3.19701 |
| ALDSMQASLEAEAK      | Mhc     | Myosin heavy chain, isoform P (EC 3.6.1.3) | 740.353 | 2 | 21.04 | 48359   | 20.88 | 260236  | 6.99057 |
| DLEEANIQHESHLANLR   | Mhc     | Myosin heavy chain, isoform P (EC 3.6.1.3) | 651.661 | 3 | 31.08 | 667254  | 31    | 1249882 | 2.43333 |
| GALQDYQER           | Mhc     | Myosin heavy chain, isoform P (EC 3.6.1.3) | 540.259 | 2 | 15.57 | 503772  | 15.55 | 1324414 | 3.41517 |
| IEEEEEVEAER         | Mhc     | Myosin heavy chain, isoform P (EC 3.6.1.3) | 737.849 | 2 | 27.66 | 871072  | 27.57 | 2436877 | 3.63414 |
| LAAEETIESLNQK       | Mhc     | Myosin heavy chain, isoform P (EC 3.6.1.3) | 787.899 | 2 | 29.52 | 307761  | 29.44 | 1119309 | 4.72453 |
| LAGADIETYLLEK       | Mhc     | Myosin heavy chain, isoform P (EC 3.6.1.3) | 718.388 | 2 | 42.99 | 649408  | 42.76 | 1212276 | 2.42497 |
| LTQEAVADLER         | Mhc     | Myosin heavy chain, isoform P (EC 3.6.1.3) | 622.828 | 2 | 25.2  | 753282  | 25.18 | 1645891 | 2.83835 |
| NYSTELFR            | Mhc     | Myosin heavy chain, isoform P (EC 3.6.1.3) | 515.254 | 2 | 28.61 | 584482  | 28.59 | 1201453 | 2.67029 |
| QIEEAEI AALNLA K    | Mhc     | Myosin heavy chain, isoform P (EC 3.6.1.3) | 821.438 | 2 | 39.84 | 244676  | 39.61 | 641209  | 3.40432 |
| QLEEAESQVSQLSK      | Mhc     | Myosin heavy chain, isoform P (EC 3.6.1.3) | 788.397 | 2 | 24.66 | 238416  | 24.6  | 763584  | 4.16048 |
| TALLDLSLGEK         | Mhc     | Myosin heavy chain, isoform P (EC 3.6.1.3) | 567.306 | 2 | 31.71 | 635833  | 31.55 | 1551318 | 3.16942 |
| TLLEQADR            | Mhc     | Myosin heavy chain, isoform P (EC 3.6.1.3) | 473.254 | 2 | 18.74 | 809820  | 18.73 | 1724785 | 2.76674 |
| VIAYFATVGASK        | Mhc     | Myosin heavy chain, isoform P (EC 3.6.1.3) | 613.843 | 2 | 33.65 | 620379  | 33.48 | 1435185 | 3.0052  |
| ADNSAPAAQDDGSGAPVVR | Mi-2    | Mi-2, isoform C (EC 3.6.1.3)               | 899.422 | 2 | 16.91 | 470838  | 16.88 | 285548  | 0.78783 |
| AVAAATSAATGATGK     | Mi-2    | Mi-2, isoform C (EC 3.6.1.3)               | 624.333 | 2 | 13.11 | 1665996 | 13.11 | 983701  | 0.76703 |
| HHYEQHQEDVGR        | Mi-2    | Mi-2, isoform C (EC 3.6.1.3)               | 512.231 | 3 | 7.62  | 201593  | 7.78  | 286609  | 1.84687 |
| HHYEQHQEDVGR        | Mi-2    | Mi-2, isoform C (EC 3.6.1.3)               | 384.425 | 4 | 7.62  | 91019   | 7.78  | 138645  | 1.97877 |
| IDGGITGLR           | Mi-2    | Mi-2, isoform C (EC 3.6.1.3)               | 501.783 | 2 | 24.03 | 1258518 | 24.04 | 897889  | 0.9268  |
| QAIDYYQDLR          | Mi-2    | Mi-2, isoform C (EC 3.6.1.3)               | 642.815 | 2 | 28.79 | 539792  | 28.68 | 906085  | 2.18054 |
| SVTGDEPEEPR         | Mi-2    | Mi-2, isoform C (EC 3.6.1.3)               | 608.278 | 2 | 13.23 | 438146  | 13.27 | 556388  | 1.64961 |
| VGGNIEVLGFNAR       | Mi-2    | Mi-2, isoform C (EC 3.6.1.3)               | 673.365 | 2 | 37.32 | 2342650 | 37.14 | 3356129 | 1.86103 |
| AELDNDNVDGPR        | CG32355 | Uncharacterized protein, isoform E         | 665.299 | 2 | 17.49 | 854844  | 17.49 | 358372  | 0.54459 |
| AGNTDTPVIEVPAGVR    | CG32355 | Uncharacterized protein, isoform E         | 920.458 | 2 | 31.26 | 799045  | 31.12 | 994850  | 1.61737 |
| ELTPFEQELQR         | CG32355 | Uncharacterized protein, isoform E         | 695.354 | 2 | 34.45 | 1822534 | 34.23 | 951564  | 0.67824 |
| FATLPSIR            | CG32355 | Uncharacterized protein, isoform E         | 452.766 | 2 | 32.1  | 2652917 | 31.93 | 2934962 | 1.43715 |
| FHDLQDAQSTASSGK     | CG32355 | Uncharacterized protein, isoform E         | 531.25  | 3 | 15.41 | 391086  | 15.36 | 283768  | 0.94257 |
| GADSLILDGHIK        | CG32355 | Uncharacterized protein, isoform E         | 413.563 | 3 | 29.68 | 1264479 | 29.53 | 1469523 | 1.50969 |

|                           |         |                                                                            |         |   |       |          |       |          |         |
|---------------------------|---------|----------------------------------------------------------------------------|---------|---|-------|----------|-------|----------|---------|
| GFMASAQDR                 | CG32355 | Uncharacterized protein, isoform E                                         | 499.722 | 2 | 11.62 | 285875   | 11.75 | 165984   | 0.75424 |
| GISEDNIQLR                | CG32355 | Uncharacterized protein, isoform E                                         | 572.801 | 2 | 25.08 | 2302903  | 24.99 | 2379743  | 1.34238 |
| NYQPDFDSQEFQR             | CG32355 | Uncharacterized protein, isoform E                                         | 837.363 | 2 | 28.43 | 615106   | 28.34 | 745801   | 1.57505 |
| RPLGPDEQPEIVLLLR          | CG32355 | Uncharacterized protein, isoform E                                         | 615.691 | 3 | 45.58 | 1022269  | 45.43 | 642182   | 0.81605 |
| SVSNTFLQPHEDVIVYR         | CG32355 | Uncharacterized protein, isoform E                                         | 668.678 | 3 | 35.81 | 2074033  | 35.7  | 1364163  | 0.85442 |
| TDYEIHTSQVDSSALEELPLQPENR | CG32355 | Uncharacterized protein, isoform E                                         | 957.793 | 3 | 39.43 | 686104   | 39.2  | 452230   | 0.85623 |
| THEDAQSLPGNSANPSR         | CG32355 | Uncharacterized protein, isoform E                                         | 594.278 | 3 | 13.23 | 675781   | 13.53 | 14072906 | 27.052  |
| STVPFATSESNR              | Zasp66  | Z band alternatively spliced PDZ-motif protein 66, isoform M               | 648.315 | 2 | 21.89 | 228788   | 21.86 | 230532   | 1.30894 |
| AVVQVFEGTSGIDAK           | Vha55   | Vacuolar proton pump subunit B (V-ATPase subunit B) (Vacuolar proton pump) | 760.901 | 2 | 33.68 | 936310   | 33.53 | 864164   | 1.19894 |
| DFISQPR                   | Vha55   | Vacuolar proton pump subunit B (V-ATPase subunit B) (Vacuolar proton pump) | 431.725 | 2 | 20.36 | 908159   | 20.31 | 646613   | 0.92492 |
| FAEIVQLR                  | Vha55   | Vacuolar proton pump subunit B (V-ATPase subunit B) (Vacuolar proton pump) | 488.285 | 2 | 33.47 | 1109279  | 33.37 | 993806   | 1.16381 |
| NFISQGNENR                | Vha55   | Vacuolar proton pump subunit B (V-ATPase subunit B) (Vacuolar proton pump) | 671.313 | 2 | 21.23 | 606233   | 21.27 | 286793   | 0.61454 |
| NTLCFTGDLIR               | Vha55   | Vacuolar proton pump subunit B (V-ATPase subunit B) (Vacuolar proton pump) | 719.853 | 2 | 41.77 | 1059567  | 41.56 | 793668   | 0.97304 |
| TPVSEMDLGR                | Vha55   | Vacuolar proton pump subunit B (V-ATPase subunit B) (Vacuolar proton pump) | 552.771 | 2 | 23.81 | 594688   | 23.84 | 576947   | 1.26029 |
| AGSEPYVPPPSYWNR           | Mf      | Myofilin, isoform H                                                        | 860.41  | 2 | 33.23 | 748487   | 33.06 | 1566838  | 2.71933 |
| AIYDHHYSR                 | Mf      | Myofilin, isoform H                                                        | 581.275 | 2 | 11.31 | 475566   | 11.41 | 651391   | 1.77932 |
| AIYDHHYSR                 | Mf      | Myofilin, isoform H                                                        | 387.853 | 3 | 11.31 | 2895978  | 11.41 | 4746762  | 2.12924 |
| ASRPYSSYLDSPSYR           | Mf      | Myofilin, isoform H                                                        | 874.916 | 2 | 25.08 | 1194562  | 25.03 | 1397150  | 1.51935 |
| ASRPYSSYLDSPSYR           | Mf      | Myofilin, isoform H                                                        | 583.613 | 3 | 25.12 | 5487893  | 25.03 | 8501748  | 2.01245 |
| DKPLTPNSLVPLEYEPEDK       | Mf      | Myofilin, isoform H                                                        | 728.707 | 3 | 38.98 | 567161   | 38.81 | 728559   | 1.66871 |
| DTYGYSPR                  | Mf      | Myofilin, isoform H                                                        | 479.717 | 2 | 14.86 | 2640775  | 14.83 | 2840777  | 1.39742 |
| FWQSYIR                   | Mf      | Myofilin, isoform H                                                        | 500.256 | 2 | 32.37 | 739255   | 32.25 | 1687659  | 2.9656  |
| GGPSVFDR                  | Mf      | Myofilin, isoform H                                                        | 417.709 | 2 | 19.86 | 5727839  | 19.85 | 7157511  | 1.62328 |
| LLAELNK                   | Mf      | Myofilin, isoform H                                                        | 400.747 | 2 | 22.38 | 846200   | 22.35 | 1253332  | 1.92405 |
| NHLEMIGR                  | Mf      | Myofilin, isoform H                                                        | 493.248 | 2 | 12.87 | 1554021  | 12.91 | 1080925  | 0.90357 |
| SASPFRRPAR                | Mf      | Myofilin, isoform H                                                        | 494.77  | 2 | 13.46 | 1272464  | 13.42 | 1443660  | 1.47381 |
| SIYDEPATANER              | Mf      | Myofilin, isoform H                                                        | 683.318 | 2 | 18.42 | 9216683  | 18.42 | 15046478 | 2.12072 |
| YGLYLR                    | Mf      | Myofilin, isoform H                                                        | 392.721 | 2 | 28.26 | 5499678  | 28.16 | 8903475  | 2.10303 |
| AGSEPYVPPPSYWNR           | Mf      | Myofilin, isoform I                                                        | 860.41  | 2 | 33.23 | 748487   | 33.06 | 1566838  | 2.71933 |
| AIYDHHYSR                 | Mf      | Myofilin, isoform I                                                        | 581.275 | 2 | 11.31 | 475566   | 11.41 | 651391   | 1.77932 |
| AIYDHHYSR                 | Mf      | Myofilin, isoform I                                                        | 387.853 | 3 | 11.31 | 2895978  | 11.41 | 4746762  | 2.12924 |
| ASRPYSSYLDSPSYR           | Mf      | Myofilin, isoform I                                                        | 874.916 | 2 | 25.08 | 1194562  | 25.03 | 1397150  | 1.51935 |
| ASRPYSSYLDSPSYR           | Mf      | Myofilin, isoform I                                                        | 583.613 | 3 | 25.12 | 5487893  | 25.03 | 8501748  | 2.01245 |
| ASSLEPLDELFEFEL           | Mf      | Myofilin, isoform I                                                        | 731.869 | 2 | 63.39 | 1138144  | 63.1  | 1815952  | 2.07267 |
| DKPLTPNSLVPLEYEPEDK       | Mf      | Myofilin, isoform I                                                        | 728.707 | 3 | 38.98 | 567161   | 38.81 | 728559   | 1.66871 |
| DTYGYSPR                  | Mf      | Myofilin, isoform I                                                        | 479.717 | 2 | 14.86 | 2640775  | 14.83 | 2840777  | 1.39742 |
| FWQSYIR                   | Mf      | Myofilin, isoform I                                                        | 500.256 | 2 | 32.37 | 739255   | 32.25 | 1687659  | 2.9656  |
| GGPSVFDR                  | Mf      | Myofilin, isoform I                                                        | 417.709 | 2 | 19.86 | 5727839  | 19.85 | 7157511  | 1.62328 |
| LLAELNK                   | Mf      | Myofilin, isoform I                                                        | 400.747 | 2 | 22.38 | 846200   | 22.35 | 1253332  | 1.92405 |
| NHLEMIGR                  | Mf      | Myofilin, isoform I                                                        | 493.248 | 2 | 12.87 | 1554021  | 12.91 | 1080925  | 0.90357 |
| SASPFRRPAR                | Mf      | Myofilin, isoform I                                                        | 494.77  | 2 | 13.46 | 1272464  | 13.42 | 1443660  | 1.47381 |
| SIYDEPATANER              | Mf      | Myofilin, isoform I                                                        | 683.318 | 2 | 18.42 | 9216683  | 18.42 | 15046478 | 2.12072 |
| YGLYLR                    | Mf      | Myofilin, isoform I                                                        | 392.721 | 2 | 28.26 | 5499678  | 28.16 | 8903475  | 2.10303 |
| HPSKPEPSGECQPDLR          | Caf1-55 | Chromatin assembly factor 1, p55 subunit, isoform B (SD22845p)             | 611.956 | 3 | 13    | 2959819  | 12.95 | 2946280  | 1.2931  |
| IEIEIK                    | Caf1-55 | Chromatin assembly factor 1, p55 subunit, isoform B (SD22845p)             | 372.729 | 2 | 26.69 | 18490798 | 26.63 | 10128032 | 0.71153 |
| IGEEQSTEDAEDGPPPELLFIHGHT | Caf1-55 | Chromatin assembly factor 1, p55 subunit, isoform B (SD22845p)             | 959.789 | 3 | 36.67 | 5605498  | 36.49 | 6740038  | 1.56196 |
| IGEEQSTEDAEDGPPPELLFIHGHT | Caf1-55 | Chromatin assembly factor 1, p55 subunit, isoform B (SD22845p)             | 720.094 | 4 | 36.67 | 22180360 | 36.49 | 27435578 | 1.60682 |
| INHEGEVNR                 | Caf1-55 | Chromatin assembly factor 1, p55 subunit, isoform B (SD22845p)             | 534.265 | 2 | 7.93  | 6273340  | 8.06  | 3016533  | 0.62464 |
| INHEGEVNR                 | Caf1-55 | Chromatin assembly factor 1, p55 subunit, isoform B (SD22845p)             | 356.512 | 3 | 7.93  | 5037983  | 8.06  | 2395439  | 0.61766 |
| LHVWDLSK                  | Caf1-55 | Chromatin assembly factor 1, p55 subunit, isoform B (SD22845p)             | 499.277 | 2 | 29.44 | 14247125 | 29.32 | 17649806 | 1.60929 |
| LMIWDR                    | Caf1-55 | Chromatin assembly factor 1, p55 subunit, isoform B (SD22845p)             | 467.744 | 2 | 35.19 | 7330851  | 35.02 | 7635260  | 1.35298 |
| NIFTGHTAVVEDVAWHLLHESLFGS | Caf1-55 | Chromatin assembly factor 1, p55 subunit, isoform B (SD22845p)             | 1145.9  | 3 | 62.65 | 358249   | 62.54 | 531197   | 1.92616 |
| NIFTGHTAVVEDVAWHLLHESLFGS | Caf1-55 | Chromatin assembly factor 1, p55 subunit, isoform B (SD22845p)             | 859.68  | 4 | 62.68 | 6111397  | 62.65 | 6672885  | 1.41839 |

|                      |          |                                                                                |         |   |       |          |       |          |         |
|----------------------|----------|--------------------------------------------------------------------------------|---------|---|-------|----------|-------|----------|---------|
| SDNAESFDDAVEER       | Caf1-55  | Chromatin assembly factor 1, p55 subunit, isoform B (SD22845p)                 | 792.326 | 2 | 23.08 | 305817   | 23.18 | 177334   | 0.75327 |
| TVALWDLR             | Caf1-55  | Chromatin assembly factor 1, p55 subunit, isoform B (SD22845p)                 | 487.277 | 2 | 39.87 | 45980548 | 39.69 | 47007576 | 1.32805 |
| VINEEYK              | Caf1-55  | Chromatin assembly factor 1, p55 subunit, isoform B (SD22845p)                 | 447.732 | 2 | 12.61 | 10431289 | 12.66 | 5073242  | 0.63179 |
| YMPQNACVIATK         | Caf1-55  | Chromatin assembly factor 1, p55 subunit, isoform B (SD22845p)                 | 698.342 | 2 | 23.89 | 7995023  | 23.84 | 9614787  | 1.56222 |
| YMPQNACVIATK         | Caf1-55  | Chromatin assembly factor 1, p55 subunit, isoform B (SD22845p)                 | 706.339 | 2 | 20.03 | 1455765  | 20.05 | 1599258  | 1.42708 |
| EVSGDASEALLK         | Atpalpha | Sodium/potassium-transporting ATPase subunit alpha                             | 645.333 | 2 | 25.45 | 660865   | 25.35 | 279051   | 0.54852 |
| IATLCNR              | Atpalpha | Sodium/potassium-transporting ATPase subunit alpha                             | 424.226 | 2 | 14.34 | 183981   | 14.32 | 209877   | 1.48188 |
| LIIVEGCQR            | Atpalpha | Sodium/potassium-transporting ATPase subunit alpha                             | 544.3   | 2 | 24.31 | 677846   | 24.36 | 746923   | 1.43142 |
| LNIPVSEVNPR          | Atpalpha | Sodium/potassium-transporting ATPase subunit alpha                             | 619.349 | 2 | 30.64 | 1527141  | 30.51 | 1174989  | 0.99949 |
| NLAFFSTNAVEGTAK      | Atpalpha | Sodium/potassium-transporting ATPase subunit alpha                             | 785.399 | 2 | 38.55 | 1771624  | 38.01 | 15711079 | 11.5201 |
| YHTEIVFAR            | Atpalpha | Sodium/potassium-transporting ATPase subunit alpha                             | 568.298 | 2 | 25.19 | 792742   | 25.03 | 558537   | 0.91526 |
| YHTEIVFAR            | Atpalpha | Sodium/potassium-transporting ATPase subunit alpha                             | 379.201 | 3 | 25.23 | 368207   | 25.07 | 375193   | 1.32369 |
| ALVDVLR              | Rm62     | Rm62, isoform H                                                                | 393.248 | 2 | 32.4  | 917820   | 32.25 | 781548   | 1.10617 |
| EANQEINPALENLAR      | Rm62     | Rm62, isoform H                                                                | 841.429 | 2 | 32.48 | 1286441  | 32.37 | 785963   | 0.79366 |
| ELAQQIQQVATEFGSSSYVR | Rm62     | Rm62, isoform H                                                                | 747.71  | 3 | 48.34 | 417102   | 48.12 | 508191   | 1.58273 |
| FGGGGGFGDR           | Rm62     | Rm62, isoform H                                                                | 463.709 | 2 | 17.67 | 571805   | 17.72 | 448173   | 1.01817 |
| NTCVFGGAPK           | Rm62     | Rm62, isoform H                                                                | 525.755 | 2 | 19.91 | 235668   | 19.91 | 262752   | 1.44833 |
| SNILVATDVAAR         | Rm62     | Rm62, isoform H                                                                | 615.346 | 2 | 29.95 | 1490640  | 29.85 | 1916326  | 1.67001 |
| YVINFDYPQNSEDIHR     | Rm62     | Rm62, isoform H                                                                | 725.004 | 3 | 37.84 | 686584   | 37.79 | 447734   | 0.84713 |
| VYSPHVLNLTLDLPLGLTK  | shi      | Shibire, isoform L                                                             | 698.405 | 3 | 53.41 | 463587   | 53.25 | 477207   | 1.3372  |
| VYSPHVLNLTLDLPLGLTK  | shi      | Shibire, isoform M                                                             | 698.405 | 3 | 53.41 | 463587   | 53.25 | 477207   | 1.3372  |
| ILPLDGLQAGYR         | norpA    | 1-phosphatidylinositol 4,5-bisphosphate phosphodiesterase (EC 3.1.4.11)        | 658.372 | 2 | 39.05 | 1848340  | 38.89 | 1619786  | 1.13841 |
| NDIEELFTSITK         | norpA    | 1-phosphatidylinositol 4,5-bisphosphate phosphodiesterase (EC 3.1.4.11)        | 705.362 | 2 | 50.41 | 647218   | 50.1  | 519426   | 1.04255 |
| VVLPDLAVLR           | norpA    | 1-phosphatidylinositol 4,5-bisphosphate phosphodiesterase (EC 3.1.4.11)        | 547.85  | 2 | 45.88 | 627980   | 45.7  | 724721   | 1.49916 |
| HPQLLYEAK            | Cklalpha | Casein kinase ialpha, isoform D (EC 2.7.11.-) (Casein kinase ialpha, isoform E | 549.801 | 2 | 20.1  | 592902   | 20.09 | 726533   | 1.59182 |
| ILSGVGFPFR           | Cklalpha | Casein kinase ialpha, isoform D (EC 2.7.11.-) (Casein kinase ialpha, isoform E | 501.79  | 2 | 30.56 | 792616   | 30.4  | 1109698  | 1.81871 |
| YASINAHLGIEQSR       | Cklalpha | Casein kinase ialpha, isoform D (EC 2.7.11.-) (Casein kinase ialpha, isoform E | 520.271 | 3 | 26.21 | 386181   | 26.15 | 468938   | 1.57742 |
| IAAEVAAPLAK          | Flo2     | Flotillin 2, isoform G                                                         | 527.319 | 2 | 25.68 | 101116   | 25.6  | 592504   | 7.61191 |
| CGVISPR              | RpS15Aa  | GEO07866p1 (Ribosomal protein S15Aa, isoform F)                                | 394.708 | 2 | 13.98 | 622408   | 13.82 | 550921   | 1.14984 |
| FDVPINDIEK           | RpS15Aa  | GEO07866p1 (Ribosomal protein S15Aa, isoform F)                                | 595.309 | 2 | 35.12 | 6034878  | 34.98 | 2750801  | 0.59212 |
| HGYIGEFEIVDDHR       | RpS15Aa  | GEO07866p1 (Ribosomal protein S15Aa, isoform F)                                | 562.934 | 3 | 31.11 | 2707218  | 31.08 | 907855   | 0.43563 |
| MNVLADALK            | RpS15Aa  | GEO07866p1 (Ribosomal protein S15Aa, isoform F)                                | 487.771 | 2 | 34.9  | 1815269  | 34.78 | 1716352  | 1.22825 |
| QFGYVVLTTSGGIMDHEEAR | RpS15Aa  | GEO07866p1 (Ribosomal protein S15Aa, isoform F)                                | 737.356 | 3 | 39.87 | 1542845  | 39.68 | 2090883  | 1.76047 |
| WTNNLLPSR            | RpS15Aa  | GEO07866p1 (Ribosomal protein S15Aa, isoform F)                                | 550.796 | 2 | 30.38 | 2286379  | 30.28 | 1280460  | 0.72751 |
| AQELWELIVK           | up       | Upheld, isoform H                                                              | 614.85  | 2 | 48.34 | 857786   | 48.15 | 594529   | 0.90036 |
| DAGVLGLSSAAMER       | up       | Upheld, isoform H                                                              | 696.843 | 2 | 30.26 | 1579477  | 30.2  | 1875543  | 1.54254 |
| IKPLAIEGFGEAK        | up       | Upheld, isoform H                                                              | 458.266 | 3 | 33.5  | 4523125  | 33.37 | 3961091  | 1.13762 |
| ISLSFR               | up       | Upheld, isoform H                                                              | 361.713 | 2 | 30.22 | 1860854  | 30.16 | 1791066  | 1.25032 |
| ALQALEHAR            | RpS19a   | Ribosomal protein S19a, isoform C (Ribosomal protein S19a, isoform D) (Ribc    | 504.783 | 2 | 16.22 | 955156   | 16.18 | 893690   | 1.21544 |
| DIDQHAVTK            | RpS19a   | Ribosomal protein S19a, isoform C (Ribosomal protein S19a, isoform D) (Ribc    | 513.764 | 2 | 10.4  | 2341073  | 10.53 | 719059   | 0.399   |
| IANQIVFK             | RpS19a   | Ribosomal protein S19a, isoform C (Ribosomal protein S19a, isoform D) (Ribc    | 466.782 | 2 | 26.32 | 23319114 | 26.31 | 14069064 | 0.78375 |
| LSSIGQR              | RpS19a   | Ribosomal protein S19a, isoform C (Ribosomal protein S19a, isoform D) (Ribc    | 380.719 | 2 | 11.74 | 2374571  | 11.84 | 1340591  | 0.73339 |
| QTGPVIVSK            | RpS19a   | Ribosomal protein S19a, isoform C (Ribosomal protein S19a, isoform D) (Ribc    | 471.785 | 2 | 20.97 | 7892233  | 20.97 | 6770915  | 1.11447 |
| SPAGVGSITK           | RpS19a   | Ribosomal protein S19a, isoform C (Ribosomal protein S19a, isoform D) (Ribc    | 458.759 | 2 | 15.88 | 11010122 | 15.86 | 5559005  | 0.65588 |
| AAEFNFR              | wupA     | GH04081p (Wings up A, isoform H)                                               | 427.711 | 2 | 24.96 | 9042040  | 24.95 | 9905750  | 1.42313 |
| GFMTPER              | wupA     | GH04081p (Wings up A, isoform H)                                               | 419.2   | 2 | 19.67 | 1284815  | 19.67 | 1246317  | 1.26012 |
| IAAEVAAPLAK          | Flo2     | Flotillin 2, isoform K (LD15975p)                                              | 527.319 | 2 | 25.68 | 101116   | 25.6  | 592504   | 7.61191 |
| STISNVAGASLTR        | ens      | Ensconsin, isoform H (LD35939p)                                                | 682.362 | 2 | 25.86 | 816429   | 25.79 | 694557   | 1.10513 |
| ALQSALR              | Ald1     | Fructose-bisphosphate aldolase (EC 4.1.2.13)                                   | 429.264 | 2 | 22.24 | 109791   | 22.21 | 356378   | 4.21664 |
| DLEAIVQPVIK          | Hsc70-3  | Heat shock 70-kDa protein cognate 3, isoform E (EC 3.6.1.3) (LD03228p1)        | 648.382 | 2 | 41.32 | 544579   | 41.07 | 1292742  | 3.08371 |
| ETAEAYLGK            | Hsc70-3  | Heat shock 70-kDa protein cognate 3, isoform E (EC 3.6.1.3) (LD03228p1)        | 491.248 | 2 | 18.78 | 1276400  | 18.74 | 1203743  | 1.22509 |
| IEIESFFEGDDFSETLTR   | Hsc70-3  | Heat shock 70-kDa protein cognate 3, isoform E (EC 3.6.1.3) (LD03228p1)        | 1067.99 | 2 | 52.47 | 497399   | 52.17 | 1038290  | 2.71167 |
| ITPSYVAFTADGER       | Hsc70-3  | Heat shock 70-kDa protein cognate 3, isoform E (EC 3.6.1.3) (LD03228p1)        | 763.878 | 2 | 32.4  | 751662   | 32.33 | 1189631  | 2.05595 |

|                        |         |                                                                             |         |   |       |          |       |          |         |
|------------------------|---------|-----------------------------------------------------------------------------|---------|---|-------|----------|-------|----------|---------|
| IVITNDQNR              | Hsc70-3 | Heat shock 70-kDa protein cognate 3, isoform E (EC 3.6.1.3) (LD03228p1)     | 536.791 | 2 | 14.68 | 403680   | 14.64 | 383242   | 1.23327 |
| NQLTTNPENTVFDKAK       | Hsc70-3 | Heat shock 70-kDa protein cognate 3, isoform E (EC 3.6.1.3) (LD03228p1)     | 846.415 | 2 | 29.52 | 625548   | 29.44 | 1240840  | 2.57678 |
| NSKPHISVDTSQGAK        | Hsc70-3 | Heat shock 70-kDa protein cognate 3, isoform E (EC 3.6.1.3) (LD03228p1)     | 523.606 | 3 | 12.41 | 133543   | 12.4  | 255862   | 2.4889  |
| VEIIANDQGNGR           | Hsc70-3 | Heat shock 70-kDa protein cognate 3, isoform E (EC 3.6.1.3) (LD03228p1)     | 614.818 | 2 | 18.24 | 20421124 | 18.27 | 30231408 | 1.9231  |
| ACYGVLR                | RpS3    | Ribosomal protein S3, isoform B (EC 3.2.2.23) (EC 4.2.99.18) (RpS3-PA)      | 419.716 | 2 | 20.14 | 3016355  | 20.13 | 2508723  | 1.08042 |
| ELNEFLTR               | RpS3    | Ribosomal protein S3, isoform B (EC 3.2.2.23) (EC 4.2.99.18) (RpS3-PA)      | 546.788 | 2 | 32.94 | 3256554  | 32.83 | 1378351  | 0.54982 |
| ELAEDGYSGVEVR          | RpS3    | Ribosomal protein S3, isoform B (EC 3.2.2.23) (EC 4.2.99.18) (RpS3-PA)      | 712.339 | 2 | 24.58 | 10406436 | 24.6  | 12489490 | 1.55907 |
| FVDGLMIHSGDPCNDYVETATR | RpS3    | Ribosomal protein S3, isoform B (EC 3.2.2.23) (EC 4.2.99.18) (RpS3-PA)      | 838.374 | 3 | 33.19 | 433927   | 33.06 | 748456   | 2.24064 |
| GCEVVVSGK              | RpS3    | Ribosomal protein S3, isoform B (EC 3.2.2.23) (EC 4.2.99.18) (RpS3-PA)      | 467.737 | 2 | 13.15 | 569662   | 13.23 | 217126   | 0.49513 |
| GLCAIAQAESLR           | RpS3    | Ribosomal protein S3, isoform B (EC 3.2.2.23) (EC 4.2.99.18) (RpS3-PA)      | 644.838 | 2 | 32.06 | 4032273  | 31.93 | 2480082  | 0.79898 |
| QGVVLIK                | RpS3    | Ribosomal protein S3, isoform B (EC 3.2.2.23) (EC 4.2.99.18) (RpS3-PA)      | 357.729 | 2 | 22.9  | 1613732  | 22.87 | 2249317  | 1.81068 |
| TEIIIMATK              | RpS3    | Ribosomal protein S3, isoform B (EC 3.2.2.23) (EC 4.2.99.18) (RpS3-PA)      | 518.291 | 2 | 24    | 876921   | 24.27 | 939582   | 1.39186 |
| VMLPYDPK               | RpS3    | Ribosomal protein S3, isoform B (EC 3.2.2.23) (EC 4.2.99.18) (RpS3-PA)      | 481.754 | 2 | 28.33 | 612094   | 28.34 | 988565   | 2.09802 |
| VMLPYDPK               | RpS3    | Ribosomal protein S3, isoform B (EC 3.2.2.23) (EC 4.2.99.18) (RpS3-PA)      | 489.752 | 2 | 25.68 | 1125339  | 25.68 | 1698752  | 1.96096 |
| LAMQVVLHTELER          | TrpA1   | TRPA1 isoform D (Transient receptor potential cation channel A1, isoform G) | 518.948 | 3 | 27.31 | 103016   | 27.24 | 1044228  | 13.1678 |
| MLEQQHHLVR             | TrpA1   | TRPA1 isoform D (Transient receptor potential cation channel A1, isoform G) | 430.896 | 3 | 13.31 | 104134   | 13.27 | 657559   | 8.20284 |
| NVIDIQGGGEHGR          | TrpA1   | TRPA1 isoform D (Transient receptor potential cation channel A1, isoform G) | 474.908 | 3 | 18.12 | 345514   | 18.16 | 3305973  | 12.4296 |
| SPLLLAASR              | TrpA1   | TRPA1 isoform D (Transient receptor potential cation channel A1, isoform G) | 464.285 | 2 | 29.1  | 430144   | 29.02 | 1188200  | 3.58838 |
| FVNLPFESTVLNCFVR       | Rtf1    | F116824p1 (Rtf1, isoform B)                                                 | 1028.04 | 2 | 65.6  | 62022    | 62.58 | 33158    | 0.69449 |
| LAMQVVLHTELER          | TrpA1   | TRPA1-C (Transient receptor potential cation channel A1, isoform H)         | 518.948 | 3 | 27.31 | 103016   | 27.24 | 1044228  | 13.1678 |
| MLEQQHHLVR             | TrpA1   | TRPA1-C (Transient receptor potential cation channel A1, isoform H)         | 430.896 | 3 | 13.31 | 104134   | 13.27 | 657559   | 8.20284 |
| NVIDIQGGGEHGR          | TrpA1   | TRPA1-C (Transient receptor potential cation channel A1, isoform H)         | 474.908 | 3 | 18.12 | 345514   | 18.16 | 3305973  | 12.4296 |
| SPLLLAASR              | TrpA1   | TRPA1-C (Transient receptor potential cation channel A1, isoform H)         | 464.285 | 2 | 29.1  | 430144   | 29.02 | 1188200  | 3.58838 |
| ISGATTFDFIPQK          | CaMKII  | Calcium/calmodulin-dependent protein kinase II, isoform M (EC 2.7.11.-) (EC | 712.875 | 2 | 38.6  | 1118955  | 38.42 | 1549927  | 1.79937 |
| ISGATTFDFIPQK          | CaMKII  | Calcium/calmodulin-dependent protein kinase II, isoform L (EC 2.7.11.-) (EC | 712.875 | 2 | 38.6  | 1118955  | 38.42 | 1549927  | 1.79937 |
| ISGATTFDFIPQK          | CaMKII  | Calcium/calmodulin-dependent protein kinase II, isoform K (EC 2.7.11.-) (EC | 712.875 | 2 | 38.6  | 1118955  | 38.42 | 1549927  | 1.79937 |
| HAQDYSLEASAK           | apolpp  | Apolipoprotein B (Apolipoprotein, isoform C) (Apolipoprotein, isoform D     | 660.315 | 2 | 14.87 | 331176   | 14.8  | 247926   | 0.97249 |
| FLSQPFQVAEVFTGHAGK     | ATPsynb | ATP synthase subunit beta (EC 7.1.2.2)                                      | 655.007 | 3 | 47.1  | 661096   | 46.95 | 927753   | 1.82301 |
| LVLEVAQHLGENTVR        | ATPsynb | ATP synthase subunit beta (EC 7.1.2.2)                                      | 839.468 | 2 | 34.87 | 556208   | 34.71 | 748475   | 1.74808 |
| ELEIEQR                | eIF4B   | Eukaryotic translation initiation factor 4B, isoform F                      | 458.74  | 2 | 17.88 | 4591316  | 17.9  | 2801196  | 0.79255 |
| QGGTSSLNVFGSAKPVDTAAR  | eIF4B   | Eukaryotic translation initiation factor 4B, isoform F                      | 688.355 | 3 | 30.18 | 747833   | 30.12 | 321395   | 0.55829 |
| TVAGGAWVYSTTAAASVR     | Rpl37A  | GEO09637p1 (Ribosomal protein L37A, isoform C)                              | 884.455 | 2 | 35.51 | 1995172  | 35.37 | 2313941  | 1.50659 |
| TVAGGAWVYSTTAAASVR     | Rpl37A  | GEO09637p1 (Ribosomal protein L37A, isoform C)                              | 589.972 | 3 | 35.55 | 824979   | 35.33 | 1038904  | 1.63589 |
| YTCSFCGK               | Rpl37A  | GEO09637p1 (Ribosomal protein L37A, isoform C)                              | 511.707 | 2 | 15.1  | 296011   | 15.08 | 174740   | 0.76684 |
| AFIVKPIPSPEVIPVIVFINPK | rdgA    | Diacylglycerol kinase (DAG kinase) (EC 2.7.1.107)                           | 806.491 | 3 | 58.34 | 7861730  | 58.25 | 6537246  | 1.08019 |
| AFIVKPIPSPEVIPVIVFINPK | rdgA    | Diacylglycerol kinase (DAG kinase) (EC 2.7.1.107)                           | 605.12  | 4 | 58.3  | 339552   | 58.29 | 268976   | 1.02903 |
| ALGWGGGYTDEPIGK        | rdgA    | Diacylglycerol kinase (DAG kinase) (EC 2.7.1.107)                           | 760.873 | 2 | 33.66 | 1454790  | 33.49 | 1166978  | 1.04204 |
| ALHEQGYSLQSVNK         | rdgA    | Diacylglycerol kinase (DAG kinase) (EC 2.7.1.107)                           | 525.27  | 3 | 20.1  | 844926   | 20.13 | 448176   | 0.68905 |
| FEESISYPK              | rdgA    | Diacylglycerol kinase (DAG kinase) (EC 2.7.1.107)                           | 550.269 | 2 | 25.08 | 699628   | 25.06 | 249796   | 0.46381 |
| FQHLLNPR               | rdgA    | Diacylglycerol kinase (DAG kinase) (EC 2.7.1.107)                           | 512.788 | 2 | 19.99 | 2182798  | 19.93 | 880908   | 0.52425 |
| GDVQVNPLEK             | rdgA    | Diacylglycerol kinase (DAG kinase) (EC 2.7.1.107)                           | 549.793 | 2 | 22.75 | 2434720  | 22.76 | 798326   | 0.42595 |
| GPGSTDEDLQIGSKPIK      | rdgA    | Diacylglycerol kinase (DAG kinase) (EC 2.7.1.107)                           | 581.304 | 3 | 23.2  | 1491415  | 23.18 | 425538   | 0.37065 |
| LGNYAPIIIVPPSWIVK      | rdgA    | Diacylglycerol kinase (DAG kinase) (EC 2.7.1.107)                           | 884.014 | 2 | 52.63 | 3322956  | 52.44 | 1330008  | 0.51994 |
| QVFDLTQGGPK            | rdgA    | Diacylglycerol kinase (DAG kinase) (EC 2.7.1.107)                           | 595.314 | 2 | 28.22 | 3580063  | 28.2  | 2623698  | 0.95202 |
| SFAAFSQR               | rdgA    | Diacylglycerol kinase (DAG kinase) (EC 2.7.1.107)                           | 457.23  | 2 | 23.28 | 6655876  | 23.37 | 6106585  | 1.19183 |
| TIPMQVDGEACR           | rdgA    | Diacylglycerol kinase (DAG kinase) (EC 2.7.1.107)                           | 688.818 | 2 | 23.21 | 1029594  | 23.29 | 655361   | 0.82687 |
| TIPMQVDGEACR           | rdgA    | Diacylglycerol kinase (DAG kinase) (EC 2.7.1.107)                           | 696.816 | 2 | 17.7  | 628084   | 17.41 | 337537   | 0.69811 |
| VKPSVIEIELLNK          | rdgA    | Diacylglycerol kinase (DAG kinase) (EC 2.7.1.107)                           | 741.451 | 2 | 38.07 | 1106361  | 37.96 | 617198   | 0.72469 |
| VKPSVIEIELLNK          | rdgA    | Diacylglycerol kinase (DAG kinase) (EC 2.7.1.107)                           | 494.636 | 3 | 38.07 | 3645006  | 37.92 | 2591446  | 0.92356 |
| VSQDWCFIDSCTAEHYFR     | rdgA    | Diacylglycerol kinase (DAG kinase) (EC 2.7.1.107)                           | 774.33  | 3 | 41.88 | 500902   | 41.72 | 464633   | 1.20498 |
| VTPNDDVTDDHVDR         | rdgA    | Diacylglycerol kinase (DAG kinase) (EC 2.7.1.107)                           | 533.241 | 3 | 14.64 | 1483070  | 14.56 | 900190   | 0.78849 |
| YIIASATR               | rdgA    | Diacylglycerol kinase (DAG kinase) (EC 2.7.1.107)                           | 447.756 | 2 | 19.6  | 1081315  | 19.55 | 314198   | 0.37746 |
| LAVAEFR                | Hsc70Cb | Hsc70Cb, isoform G (Hsc70Cb, isoform H)                                     | 403.232 | 2 | 26.17 | 448094   | 26.11 | 568800   | 1.64897 |

|                           |           |                                                   |         |   |       |         |       |         |         |
|---------------------------|-----------|---------------------------------------------------|---------|---|-------|---------|-------|---------|---------|
| TADSPVQISAVR              | Hsc70Cb   | Hsc70Cb, isoform G (Hsc70Cb, isoform H)           | 622.336 | 2 | 25.12 | 1436637 | 25.06 | 841173  | 0.76061 |
| AFIVKPIPSPEVIPVIVFINPK    | rdgA      | Diacylglycerol kinase (DAG kinase) (EC 2.7.1.107) | 806.491 | 3 | 58.34 | 7861730 | 58.25 | 6537246 | 1.08019 |
| AFIVKPIPSPEVIPVIVFINPK    | rdgA      | Diacylglycerol kinase (DAG kinase) (EC 2.7.1.107) | 605.12  | 4 | 58.3  | 339552  | 58.29 | 268976  | 1.02903 |
| ALGWGGGYTDEPIGK           | rdgA      | Diacylglycerol kinase (DAG kinase) (EC 2.7.1.107) | 760.873 | 2 | 33.66 | 1454790 | 33.49 | 1166978 | 1.04204 |
| ALHEQQGYSLQSVNK           | rdgA      | Diacylglycerol kinase (DAG kinase) (EC 2.7.1.107) | 525.27  | 3 | 20.1  | 844926  | 20.13 | 448176  | 0.68905 |
| FEESISYPK                 | rdgA      | Diacylglycerol kinase (DAG kinase) (EC 2.7.1.107) | 550.269 | 2 | 25.08 | 699628  | 25.06 | 249796  | 0.46381 |
| FMHLEK                    | rdgA      | Diacylglycerol kinase (DAG kinase) (EC 2.7.1.107) | 410.705 | 2 | 11.03 | 406137  | 11.1  | 167691  | 0.53636 |
| FQHLLNPR                  | rdgA      | Diacylglycerol kinase (DAG kinase) (EC 2.7.1.107) | 512.788 | 2 | 19.99 | 2182798 | 19.93 | 880908  | 0.52425 |
| GDVQVNPLEK                | rdgA      | Diacylglycerol kinase (DAG kinase) (EC 2.7.1.107) | 549.793 | 2 | 22.75 | 2434720 | 22.76 | 798326  | 0.42595 |
| GPGSTDEDLQIGSKPIK         | rdgA      | Diacylglycerol kinase (DAG kinase) (EC 2.7.1.107) | 581.304 | 3 | 23.2  | 1491415 | 23.18 | 425538  | 0.37065 |
| LGNYAPIIIVPPSWIVK         | rdgA      | Diacylglycerol kinase (DAG kinase) (EC 2.7.1.107) | 884.014 | 2 | 52.63 | 3322956 | 52.44 | 1330008 | 0.51994 |
| NANEIATYLESQER            | rdgA      | Diacylglycerol kinase (DAG kinase) (EC 2.7.1.107) | 819.392 | 2 | 35.43 | 3962934 | 35.29 | 2961008 | 0.97061 |
| NANEIATYLESQER            | rdgA      | Diacylglycerol kinase (DAG kinase) (EC 2.7.1.107) | 546.597 | 3 | 35.43 | 1543644 | 35.29 | 934216  | 0.78618 |
| QVFDLTQGGPK               | rdgA      | Diacylglycerol kinase (DAG kinase) (EC 2.7.1.107) | 595.314 | 2 | 28.22 | 3580063 | 28.2  | 2623698 | 0.95202 |
| SFAAFSQR                  | rdgA      | Diacylglycerol kinase (DAG kinase) (EC 2.7.1.107) | 457.23  | 2 | 23.28 | 6655876 | 23.37 | 6106585 | 1.19183 |
| TIPMQVDGEACR              | rdgA      | Diacylglycerol kinase (DAG kinase) (EC 2.7.1.107) | 688.818 | 2 | 23.21 | 1029594 | 23.29 | 655361  | 0.82687 |
| TIPMQVDGEACR              | rdgA      | Diacylglycerol kinase (DAG kinase) (EC 2.7.1.107) | 696.816 | 2 | 17.7  | 628084  | 17.41 | 337537  | 0.69811 |
| VKPSVIEIELLNK             | rdgA      | Diacylglycerol kinase (DAG kinase) (EC 2.7.1.107) | 741.451 | 2 | 38.07 | 1106361 | 37.96 | 617198  | 0.72469 |
| VKPSVIEIELLNK             | rdgA      | Diacylglycerol kinase (DAG kinase) (EC 2.7.1.107) | 494.636 | 3 | 38.07 | 3645006 | 37.92 | 2591446 | 0.92356 |
| VSQDWCFIDSCTAEHYFR        | rdgA      | Diacylglycerol kinase (DAG kinase) (EC 2.7.1.107) | 774.33  | 3 | 41.88 | 500902  | 41.72 | 464633  | 1.20498 |
| VTPNDDVTDDHVDR            | rdgA      | Diacylglycerol kinase (DAG kinase) (EC 2.7.1.107) | 533.241 | 3 | 14.64 | 1483070 | 14.56 | 900190  | 0.78849 |
| YIIASATR                  | rdgA      | Diacylglycerol kinase (DAG kinase) (EC 2.7.1.107) | 447.756 | 2 | 19.6  | 1081315 | 19.55 | 314198  | 0.37746 |
| ALDSMQASLEAEAK            | Mhc       | Myosin heavy chain, isoform S (EC 3.6.1.3)        | 732.356 | 2 | 29.64 | 321135  | 29.49 | 790332  | 3.19701 |
| ALDSMQASLEAEAK            | Mhc       | Myosin heavy chain, isoform S (EC 3.6.1.3)        | 740.353 | 2 | 21.04 | 48359   | 20.88 | 260236  | 6.99057 |
| DLEEANIQUESTLANLR         | Mhc       | Myosin heavy chain, isoform S (EC 3.6.1.3)        | 651.661 | 3 | 31.08 | 667254  | 31    | 1249882 | 2.43333 |
| GALQDYQER                 | Mhc       | Myosin heavy chain, isoform S (EC 3.6.1.3)        | 540.259 | 2 | 15.57 | 503772  | 15.55 | 1324414 | 3.41517 |
| IELEEEVEAER               | Mhc       | Myosin heavy chain, isoform S (EC 3.6.1.3)        | 737.849 | 2 | 27.66 | 871072  | 27.57 | 2436877 | 3.63414 |
| LAEAEETIESLNQK            | Mhc       | Myosin heavy chain, isoform S (EC 3.6.1.3)        | 787.899 | 2 | 29.52 | 307761  | 29.44 | 1119309 | 4.72453 |
| LAGADIETYLLEK             | Mhc       | Myosin heavy chain, isoform S (EC 3.6.1.3)        | 718.388 | 2 | 42.99 | 649408  | 42.76 | 1212276 | 2.42497 |
| LTQEAVADLER               | Mhc       | Myosin heavy chain, isoform S (EC 3.6.1.3)        | 622.828 | 2 | 25.2  | 753282  | 25.18 | 1645891 | 2.83835 |
| NYSTELFR                  | Mhc       | Myosin heavy chain, isoform S (EC 3.6.1.3)        | 515.254 | 2 | 28.61 | 584482  | 28.59 | 1201453 | 2.67029 |
| QIEEAEIEAALNLAK           | Mhc       | Myosin heavy chain, isoform S (EC 3.6.1.3)        | 821.438 | 2 | 39.84 | 244676  | 39.61 | 641209  | 3.40432 |
| QLEEAESQVSQLSK            | Mhc       | Myosin heavy chain, isoform S (EC 3.6.1.3)        | 788.397 | 2 | 24.66 | 238416  | 24.6  | 763584  | 4.16048 |
| TALLDSLSGEK               | Mhc       | Myosin heavy chain, isoform S (EC 3.6.1.3)        | 567.306 | 2 | 31.71 | 635833  | 31.55 | 1551318 | 3.16942 |
| TLLEQADR                  | Mhc       | Myosin heavy chain, isoform S (EC 3.6.1.3)        | 473.254 | 2 | 18.74 | 809820  | 18.73 | 1724785 | 2.76674 |
| VIAYFATVGASK              | Mhc       | Myosin heavy chain, isoform S (EC 3.6.1.3)        | 613.843 | 2 | 33.65 | 620379  | 33.48 | 1435185 | 3.0052  |
| AELDDNEDVGPR              | lincRNA.4 | Uncharacterized protein, isoform I                | 665.299 | 2 | 17.49 | 854844  | 17.49 | 358372  | 0.54459 |
| EQRPSSLTTTETQTSR          | lincRNA.4 | Uncharacterized protein, isoform I                | 582.971 | 3 | 21    | 714722  | 20.97 | 708419  | 1.28758 |
| FATLPSIR                  | lincRNA.4 | Uncharacterized protein, isoform I                | 452.766 | 2 | 32.1  | 2652917 | 31.93 | 2934962 | 1.43715 |
| FHDLQDAQSTASSGK           | lincRNA.4 | Uncharacterized protein, isoform I                | 531.25  | 3 | 15.41 | 391086  | 15.36 | 283768  | 0.94257 |
| GADSLILDGHIK              | lincRNA.4 | Uncharacterized protein, isoform I                | 413.563 | 3 | 29.68 | 1264479 | 29.53 | 1469523 | 1.50969 |
| GFMASQDR                  | lincRNA.4 | Uncharacterized protein, isoform I                | 499.722 | 2 | 11.62 | 285875  | 11.75 | 165984  | 0.75424 |
| GISEDNIQLR                | lincRNA.4 | Uncharacterized protein, isoform I                | 572.801 | 2 | 25.08 | 2302903 | 24.99 | 2379743 | 1.34238 |
| LAELEVER                  | lincRNA.4 | Uncharacterized protein, isoform I                | 479.764 | 2 | 23.2  | 1227100 | 23.26 | 1368562 | 1.44879 |
| NYQPDFDSQEFQR             | lincRNA.4 | Uncharacterized protein, isoform I                | 837.363 | 2 | 28.43 | 615106  | 28.34 | 745801  | 1.57505 |
| SNLQSGAVINK               | lincRNA.4 | Uncharacterized protein, isoform I                | 565.812 | 2 | 16.44 | 787854  | 16.41 | 462469  | 0.76253 |
| STASEPTAEVELK             | lincRNA.4 | Uncharacterized protein, isoform I                | 745.865 | 2 | 22.94 | 667731  | 22.98 | 801337  | 1.55896 |
| SVEAAEQQDEVDGAR           | lincRNA.4 | Uncharacterized protein, isoform I                | 802.363 | 2 | 15.1  | 653414  | 15.03 | 773644  | 1.53807 |
| SVSNTFLQPHEDVIVYR         | lincRNA.4 | Uncharacterized protein, isoform I                | 668.678 | 3 | 35.81 | 2074033 | 35.7  | 1364163 | 0.85442 |
| TDYEIHTSQVDSSALEELPLQPENR | lincRNA.4 | Uncharacterized protein, isoform I                | 957.793 | 3 | 39.43 | 686104  | 39.2  | 452230  | 0.85623 |
| ALDSMQASLEAEAK            | Mhc       | Myosin heavy chain, isoform U (EC 3.6.1.3)        | 732.356 | 2 | 29.64 | 321135  | 29.49 | 790332  | 3.19701 |
| ALDSMQASLEAEAK            | Mhc       | Myosin heavy chain, isoform U (EC 3.6.1.3)        | 740.353 | 2 | 21.04 | 48359   | 20.88 | 260236  | 6.99057 |
| DLEEANIQUESTLANLR         | Mhc       | Myosin heavy chain, isoform U (EC 3.6.1.3)        | 651.661 | 3 | 31.08 | 667254  | 31    | 1249882 | 2.43333 |



|                          |        |                                            |         |   |       |         |       |          |         |
|--------------------------|--------|--------------------------------------------|---------|---|-------|---------|-------|----------|---------|
| GALQDYQER                | Mhc    | Myosin heavy chain, isoform U (EC 3.6.1.3) | 540.259 | 2 | 15.57 | 503772  | 15.55 | 1324414  | 3.41517 |
| IEEEEEVEAER              | Mhc    | Myosin heavy chain, isoform U (EC 3.6.1.3) | 737.849 | 2 | 27.66 | 871072  | 27.57 | 2436877  | 3.63414 |
| LAEAEETIESLNQK           | Mhc    | Myosin heavy chain, isoform U (EC 3.6.1.3) | 787.899 | 2 | 29.52 | 307761  | 29.44 | 1119309  | 4.72453 |
| LAGADIETYLLEK            | Mhc    | Myosin heavy chain, isoform U (EC 3.6.1.3) | 718.388 | 2 | 42.99 | 649408  | 42.76 | 1212276  | 2.42497 |
| LTQEAVADLER              | Mhc    | Myosin heavy chain, isoform U (EC 3.6.1.3) | 622.828 | 2 | 25.2  | 753282  | 25.18 | 1645891  | 2.83835 |
| NYSTELFR                 | Mhc    | Myosin heavy chain, isoform U (EC 3.6.1.3) | 515.254 | 2 | 28.61 | 584482  | 28.59 | 1201453  | 2.67029 |
| QIEEAEI AALNLA K         | Mhc    | Myosin heavy chain, isoform U (EC 3.6.1.3) | 821.438 | 2 | 39.84 | 244676  | 39.61 | 641209   | 3.40432 |
| QLEEAESQVSQLSK           | Mhc    | Myosin heavy chain, isoform U (EC 3.6.1.3) | 788.397 | 2 | 24.66 | 238416  | 24.6  | 763584   | 4.16048 |
| TALLDLSLGEK              | Mhc    | Myosin heavy chain, isoform U (EC 3.6.1.3) | 567.306 | 2 | 31.71 | 635833  | 31.55 | 1551318  | 3.16942 |
| TLLEQADR                 | Mhc    | Myosin heavy chain, isoform U (EC 3.6.1.3) | 473.254 | 2 | 18.74 | 809820  | 18.73 | 1724785  | 2.76674 |
| VIAYFATVGASK             | Mhc    | Myosin heavy chain, isoform U (EC 3.6.1.3) | 613.843 | 2 | 33.65 | 620379  | 33.48 | 1435185  | 3.0052  |
| AASPASSVSSLSR            | Gug    | Grunge, isoform F (EC 3.5.1.98)            | 610.317 | 2 | 19.87 | 670193  | 19.91 | 1047675  | 2.03072 |
| ALQALVK                  | Gug    | Grunge, isoform F (EC 3.5.1.98)            | 371.745 | 2 | 22.24 | 1429410 | 22.24 | 802676   | 0.72947 |
| ASPSVQISSSGGPGSPGSGVPGC  | Gug    | Grunge, isoform F (EC 3.5.1.98)            | 862.663 | 4 | 27.81 | 128265  | 27.69 | 91817    | 0.9299  |
| MYAPQPGQR                | Gug    | Grunge, isoform F (EC 3.5.1.98)            | 532.253 | 2 | 11.22 | 597570  | 11.23 | 396368   | 0.86165 |
| QHQA AAAAAAQQHK          | Gug    | Grunge, isoform F (EC 3.5.1.98)            | 477.58  | 3 | 7.39  | 102108  | 7.46  | 61942    | 0.78804 |
| QSLHDQYFR                | Gug    | Grunge, isoform F (EC 3.5.1.98)            | 398.528 | 3 | 18.86 | 599467  | 18.89 | 746793   | 1.61829 |
| SQSAIFVR                 | Gug    | Grunge, isoform F (EC 3.5.1.98)            | 454.253 | 2 | 22.57 | 2827859 | 22.59 | 2397174  | 1.10119 |
| WSPGVVADGDLLMFLR         | Gug    | Grunge, isoform F (EC 3.5.1.98)            | 888.461 | 2 | 59.21 | 701351  | 58.95 | 433086   | 0.80216 |
| WSPGVVADGDLLMFLR         | Gug    | Grunge, isoform F (EC 3.5.1.98)            | 896.459 | 2 | 56.45 | 1934292 | 56.29 | 935150   | 0.62803 |
| YGDPLAAK                 | Gug    | Grunge, isoform F (EC 3.5.1.98)            | 417.721 | 2 | 19.02 | 1065996 | 19    | 938830   | 1.14407 |
| TLIDDDNPPVSFVK           | wds    | Will die slowly, isoform B                 | 780.401 | 2 | 38.13 | 2624767 | 37.75 | 1560803  | 0.77247 |
| AASPASSVSSLSR            | Gug    | Grunge, isoform G (EC 3.5.1.98)            | 610.317 | 2 | 19.87 | 670193  | 19.91 | 1047675  | 2.03072 |
| ALQALVK                  | Gug    | Grunge, isoform G (EC 3.5.1.98)            | 371.745 | 2 | 22.24 | 1429410 | 22.24 | 802676   | 0.72947 |
| ASPSVQISSSGGPGSPGSGVPGC  | Gug    | Grunge, isoform G (EC 3.5.1.98)            | 862.663 | 4 | 27.81 | 128265  | 27.69 | 91817    | 0.9299  |
| MSYADQLQAAEFQR           | Gug    | Grunge, isoform G (EC 3.5.1.98)            | 829.386 | 2 | 32.37 | 172984  | 32.33 | 256318   | 1.92484 |
| MYAPQPGQR                | Gug    | Grunge, isoform G (EC 3.5.1.98)            | 532.253 | 2 | 11.22 | 597570  | 11.23 | 396368   | 0.86165 |
| QHQA AAAAAAQQHK          | Gug    | Grunge, isoform G (EC 3.5.1.98)            | 477.58  | 3 | 7.39  | 102108  | 7.46  | 61942    | 0.78804 |
| QSLHDQYFR                | Gug    | Grunge, isoform G (EC 3.5.1.98)            | 398.528 | 3 | 18.86 | 599467  | 18.89 | 746793   | 1.61829 |
| SQSAIFVR                 | Gug    | Grunge, isoform G (EC 3.5.1.98)            | 454.253 | 2 | 22.57 | 2827859 | 22.59 | 2397174  | 1.10119 |
| WSPGVVADGDLLMFLR         | Gug    | Grunge, isoform G (EC 3.5.1.98)            | 888.461 | 2 | 59.21 | 701351  | 58.95 | 433086   | 0.80216 |
| WSPGVVADGDLLMFLR         | Gug    | Grunge, isoform G (EC 3.5.1.98)            | 896.459 | 2 | 56.45 | 1934292 | 56.29 | 935150   | 0.62803 |
| YGDPLAAK                 | Gug    | Grunge, isoform G (EC 3.5.1.98)            | 417.721 | 2 | 19.02 | 1065996 | 19    | 938830   | 1.14407 |
| AELDDNEDVGPR             | CG6239 | Uncharacterized protein, isoform G         | 665.299 | 2 | 17.49 | 854844  | 17.49 | 358372   | 0.54459 |
| EQRPSLLTTETQTSR          | CG6239 | Uncharacterized protein, isoform G         | 582.971 | 3 | 21    | 714722  | 20.97 | 708419   | 1.28758 |
| FATLPSIR                 | CG6239 | Uncharacterized protein, isoform G         | 452.766 | 2 | 32.1  | 2652917 | 31.93 | 2934962  | 1.43715 |
| FHDLQDAQSTASSGK          | CG6239 | Uncharacterized protein, isoform G         | 531.25  | 3 | 15.41 | 391086  | 15.36 | 283768   | 0.94257 |
| GADSLILDGHIK             | CG6239 | Uncharacterized protein, isoform G         | 413.563 | 3 | 29.68 | 1264479 | 29.53 | 1469523  | 1.50969 |
| GFMASAQDR                | CG6239 | Uncharacterized protein, isoform G         | 499.722 | 2 | 11.62 | 285875  | 11.75 | 165984   | 0.75424 |
| GISEDNILR                | CG6239 | Uncharacterized protein, isoform G         | 572.801 | 2 | 25.08 | 2302903 | 24.99 | 2379743  | 1.34238 |
| LAELEVER                 | CG6239 | Uncharacterized protein, isoform G         | 479.764 | 2 | 23.2  | 1227100 | 23.26 | 1368562  | 1.44879 |
| NYQPFDQSQEFQR            | CG6239 | Uncharacterized protein, isoform G         | 837.363 | 2 | 28.43 | 615106  | 28.34 | 745801   | 1.57505 |
| SNLQSGAVINK              | CG6239 | Uncharacterized protein, isoform G         | 565.812 | 2 | 16.44 | 787854  | 16.41 | 462469   | 0.76253 |
| STASEPTEAEVELK           | CG6239 | Uncharacterized protein, isoform G         | 745.865 | 2 | 22.94 | 667731  | 22.98 | 801337   | 1.55896 |
| SVEAAEQDEVDGAR           | CG6239 | Uncharacterized protein, isoform G         | 802.363 | 2 | 15.1  | 653414  | 15.03 | 773644   | 1.53807 |
| SVSNTFLQPHEDVIVYR        | CG6239 | Uncharacterized protein, isoform G         | 668.678 | 3 | 35.81 | 2074033 | 35.7  | 1364163  | 0.85442 |
| TDYEIHTSQVDSALEELPLQPENR | CG6239 | Uncharacterized protein, isoform G         | 957.793 | 3 | 39.43 | 686104  | 39.2  | 452230   | 0.85623 |
| DGFQVCMDVSHFKPSELVVK     | Hsp23  | Heat shock protein 23, isoform B           | 774.713 | 3 | 43.1  | 204592  | 43.01 | 339238   | 2.15396 |
| DGFQVCMDVSHFKPSELVVK     | Hsp23  | Heat shock protein 23, isoform B           | 581.287 | 4 | 43.1  | 402779  | 42.97 | 317497   | 1.02399 |
| DGFQVCMDVSHFKPSELVVK     | Hsp23  | Heat shock protein 23, isoform B           | 780.045 | 3 | 38.76 | 29062   | 38.74 | 599164   | 26.782  |
| DGFQVCMDVSHFKPSELVVK     | Hsp23  | Heat shock protein 23, isoform B           | 585.286 | 4 | 38.73 | 18808   | 38.78 | 469777   | 32.4468 |
| IVQIQVGPAPHLNVK          | Hsp23  | Heat shock protein 23, isoform B           | 822.483 | 2 | 30.45 | 27968   | 30.12 | 3476212  | 161.461 |
| IVQIQVGPAPHLNVK          | Hsp23  | Heat shock protein 23, isoform B           | 548.658 | 3 | 30.33 | 1113    | 30.08 | 27440434 | 32027.1 |

|                          |        |                                                                       |         |   |       |         |       |         |         |
|--------------------------|--------|-----------------------------------------------------------------------|---------|---|-------|---------|-------|---------|---------|
| MSMVPFYEPYYCQR           | Hsp23  | Heat shock protein 23, isoform B                                      | 935.902 | 2 | 43.25 | 0       | 43.16 | 737059  | #DIV/0! |
| MSMVPFYEPYYCQR           | Hsp23  | Heat shock protein 23, isoform B                                      | 943.899 | 2 | 39.58 | 18216   | 39.45 | 774858  | 55.2575 |
| MSMVPFYEPYYCQR           | Hsp23  | Heat shock protein 23, isoform B                                      | 943.899 | 2 | 37.24 | 37268   | 37.1  | 726973  | 25.3399 |
| MSMVPFYEPYYCQR           | Hsp23  | Heat shock protein 23, isoform B                                      | 951.897 | 2 | 34.82 | 0       | 34.71 | 818198  | #DIV/0! |
| NPYLALVGPMEQQLR          | Hsp23  | Heat shock protein 23, isoform B                                      | 864.959 | 2 | 46.34 | 474657  | 45.99 | 3156756 | 8.6394  |
| NPYLALVGPMEQQLR          | Hsp23  | Heat shock protein 23, isoform B                                      | 576.975 | 3 | 46.1  | 37103   | 45.99 | 888801  | 31.1184 |
| NPYLALVGPMEQQLR          | Hsp23  | Heat shock protein 23, isoform B                                      | 872.956 | 2 | 38.21 | 28503   | 37.96 | 3708824 | 169.032 |
| NPYLALVGPMEQQLR          | Hsp23  | Heat shock protein 23, isoform B                                      | 582.307 | 3 | 38.46 | 368115  | 37.96 | 1423477 | 5.0233  |
| QVGASSGSSGAVSK           | Hsp23  | Heat shock protein 23, isoform B                                      | 611.307 | 2 | 13.12 | 130999  | 8.97  | 467450  | 4.63542 |
| VASTLSSDGVLTIK           | Hsp23  | Heat shock protein 23, isoform B                                      | 695.893 | 2 | 33.08 | 0       | 33.09 | 2054661 | #DIV/0! |
| VQDNSVLVEGNHEER          | Hsp23  | Heat shock protein 23, isoform B                                      | 575.611 | 3 | 16.47 | 0       | 16.8  | 50272   | #DIV/0! |
| IVSQHTSSSR               | Lam    | Lamin, isoform B (Lamin, isoform C) (Lamin, isoform D)                | 551.286 | 2 | 7     | 45019   | 6.94  | 21557   | 0.62203 |
| LATYIDR                  | Lam    | Lamin, isoform B (Lamin, isoform C) (Lamin, isoform D)                | 426.235 | 2 | 19.41 | 565173  | 19.45 | 354186  | 0.81409 |
| LNITPATNTATVQSFSQSLR     | Lam    | Lamin, isoform B (Lamin, isoform C) (Lamin, isoform D)                | 717.046 | 3 | 39.95 | 713399  | 39.69 | 972294  | 1.77047 |
| TILLNSEGEAVANLDR         | Lam    | Lamin, isoform B (Lamin, isoform C) (Lamin, isoform D)                | 857.952 | 2 | 36.67 | 1134982 | 36.48 | 1426663 | 1.63288 |
| ALDSMQASLEAEAK           | Mhc    | Myosin heavy chain, isoform T (EC 3.6.1.3)                            | 732.356 | 2 | 29.64 | 321135  | 29.49 | 790332  | 3.19701 |
| ALDSMQASLEAEAK           | Mhc    | Myosin heavy chain, isoform T (EC 3.6.1.3)                            | 740.353 | 2 | 21.04 | 48359   | 20.88 | 260236  | 6.99057 |
| DLEEANIQHSTLANLR         | Mhc    | Myosin heavy chain, isoform T (EC 3.6.1.3)                            | 651.661 | 3 | 31.08 | 667254  | 31    | 1249882 | 2.43333 |
| GALQDYQER                | Mhc    | Myosin heavy chain, isoform T (EC 3.6.1.3)                            | 540.259 | 2 | 15.57 | 503772  | 15.55 | 1324414 | 3.41517 |
| IEEEEEVEAER              | Mhc    | Myosin heavy chain, isoform T (EC 3.6.1.3)                            | 737.849 | 2 | 27.66 | 871072  | 27.57 | 2436877 | 3.63414 |
| LAEAEETIESLNQK           | Mhc    | Myosin heavy chain, isoform T (EC 3.6.1.3)                            | 787.899 | 2 | 29.52 | 307761  | 29.44 | 1119309 | 4.72453 |
| LAGADIETYLLEK            | Mhc    | Myosin heavy chain, isoform T (EC 3.6.1.3)                            | 718.388 | 2 | 42.99 | 649408  | 42.76 | 1212276 | 2.42497 |
| LTQEAVADLER              | Mhc    | Myosin heavy chain, isoform T (EC 3.6.1.3)                            | 622.828 | 2 | 25.2  | 753282  | 25.18 | 1645891 | 2.83835 |
| NYSTELFR                 | Mhc    | Myosin heavy chain, isoform T (EC 3.6.1.3)                            | 515.254 | 2 | 28.61 | 584482  | 28.59 | 1201453 | 2.67029 |
| QIEEAEI AALNLAK          | Mhc    | Myosin heavy chain, isoform T (EC 3.6.1.3)                            | 821.438 | 2 | 39.84 | 244676  | 39.61 | 641209  | 3.40432 |
| QLEEAESQVSQLSK           | Mhc    | Myosin heavy chain, isoform T (EC 3.6.1.3)                            | 788.397 | 2 | 24.66 | 238416  | 24.6  | 763584  | 4.16048 |
| TALLDSLSGEK              | Mhc    | Myosin heavy chain, isoform T (EC 3.6.1.3)                            | 567.306 | 2 | 31.71 | 635833  | 31.55 | 1551318 | 3.16942 |
| TLLEQADR                 | Mhc    | Myosin heavy chain, isoform T (EC 3.6.1.3)                            | 473.254 | 2 | 18.74 | 809820  | 18.73 | 1724785 | 2.76674 |
| VIAYFATVGASK             | Mhc    | Myosin heavy chain, isoform T (EC 3.6.1.3)                            | 613.843 | 2 | 33.65 | 620379  | 33.48 | 1435185 | 3.0052  |
| GDVGPAGEVEFR             | RpS10b | Ribosomal protein S10b, isoform D (Ribosomal protein S10b, isoform E) | 645.31  | 2 | 25.28 | 985914  | 25.27 | 757708  | 0.99836 |
| SETVRPRPAVGGPR           | RpS10b | Ribosomal protein S10b, isoform D (Ribosomal protein S10b, isoform E) | 493.611 | 3 | 12.12 | 3082161 | 12.12 | 2287000 | 0.9639  |
| VAIYELFK                 | RpS10b | Ribosomal protein S10b, isoform D (Ribosomal protein S10b, isoform E) | 573.316 | 2 | 46.67 | 2373270 | 46.49 | 2589560 | 1.41743 |
| AGIAVEGDIK               | Arr1   | Arrestin 1, isoform B                                                 | 486.772 | 2 | 22.98 | 2931108 | 22.98 | 1880959 | 0.83362 |
| ASDESQPCGVQYFVK          | Arr1   | Arrestin 1, isoform B                                                 | 857.891 | 2 | 30.22 | 589087  | 30.08 | 894673  | 1.97291 |
| DFLLSPGELELEVTLDK        | Arr1   | Arrestin 1, isoform B                                                 | 959.506 | 2 | 56.3  | 265898  | 55.99 | 462292  | 2.25852 |
| DFVDSVTQVEPIDGIIVLDDEYVR | Arr1   | Arrestin 1, isoform B                                                 | 1368.68 | 2 | 59.17 | 646283  | 58.87 | 419252  | 0.8427  |
| DFVDSVTQVEPIDGIIVLDDEYVR | Arr1   | Arrestin 1, isoform B                                                 | 912.792 | 3 | 59.17 | 2018632 | 58.83 | 1330820 | 0.85642 |
| IFTGDSDCDR               | Arr1   | Arrestin 1, isoform B                                                 | 593.246 | 2 | 14.94 | 1443871 | 14.91 | 748462  | 0.67339 |
| IFVQLVCNFR               | Arr1   | Arrestin 1, isoform B                                                 | 648.35  | 2 | 42.99 | 1459871 | 42.8  | 1343715 | 1.19568 |
| ISVNICVR                 | Arr1   | Arrestin 1, isoform B                                                 | 480.768 | 2 | 29.06 | 677107  | 28.92 | 402608  | 0.77241 |
| QGIQPCTVVR               | Arr1   | Arrestin 1, isoform B                                                 | 579.308 | 2 | 21.75 | 818570  | 21.73 | 482335  | 0.76545 |
| STINLIR                  | Arr1   | Arrestin 1, isoform B                                                 | 437.261 | 2 | 27.76 | 3970398 | 27.69 | 3553533 | 1.16265 |
| VMYLVPTLVANCDR           | Arr1   | Arrestin 1, isoform B                                                 | 825.921 | 2 | 44.34 | 873153  | 44.19 | 632809  | 0.94147 |
| ALDSMQASLEAEAK           | Mhc    | Myosin heavy chain, isoform R (EC 3.6.1.3)                            | 732.356 | 2 | 29.64 | 321135  | 29.49 | 790332  | 3.19701 |
| ALDSMQASLEAEAK           | Mhc    | Myosin heavy chain, isoform R (EC 3.6.1.3)                            | 740.353 | 2 | 21.04 | 48359   | 20.88 | 260236  | 6.99057 |
| DLEEANIQHSTLANLR         | Mhc    | Myosin heavy chain, isoform R (EC 3.6.1.3)                            | 651.661 | 3 | 31.08 | 667254  | 31    | 1249882 | 2.43333 |
| GALQDYQER                | Mhc    | Myosin heavy chain, isoform R (EC 3.6.1.3)                            | 540.259 | 2 | 15.57 | 503772  | 15.55 | 1324414 | 3.41517 |
| IEEEEEVEAER              | Mhc    | Myosin heavy chain, isoform R (EC 3.6.1.3)                            | 737.849 | 2 | 27.66 | 871072  | 27.57 | 2436877 | 3.63414 |
| LAEAEETIESLNQK           | Mhc    | Myosin heavy chain, isoform R (EC 3.6.1.3)                            | 787.899 | 2 | 29.52 | 307761  | 29.44 | 1119309 | 4.72453 |
| LAGADIETYLLEK            | Mhc    | Myosin heavy chain, isoform R (EC 3.6.1.3)                            | 718.388 | 2 | 42.99 | 649408  | 42.76 | 1212276 | 2.42497 |
| LTQEAVADLER              | Mhc    | Myosin heavy chain, isoform R (EC 3.6.1.3)                            | 622.828 | 2 | 25.2  | 753282  | 25.18 | 1645891 | 2.83835 |
| NYSTELFR                 | Mhc    | Myosin heavy chain, isoform R (EC 3.6.1.3)                            | 515.254 | 2 | 28.61 | 584482  | 28.59 | 1201453 | 2.67029 |
| QIEEAEI AALNLAK          | Mhc    | Myosin heavy chain, isoform R (EC 3.6.1.3)                            | 821.438 | 2 | 39.84 | 244676  | 39.61 | 641209  | 3.40432 |

|                           |         |                                                                               |         |   |       |         |       |          |         |
|---------------------------|---------|-------------------------------------------------------------------------------|---------|---|-------|---------|-------|----------|---------|
| QLEEAESQVSQLSK            | Mhc     | Myosin heavy chain, isoform R (EC 3.6.1.3)                                    | 788.397 | 2 | 24.66 | 238416  | 24.6  | 763584   | 4.16048 |
| TALLDLSLGEK               | Mhc     | Myosin heavy chain, isoform R (EC 3.6.1.3)                                    | 567.306 | 2 | 31.71 | 635833  | 31.55 | 1551318  | 3.16942 |
| TLLEQADR                  | Mhc     | Myosin heavy chain, isoform R (EC 3.6.1.3)                                    | 473.254 | 2 | 18.74 | 809820  | 18.73 | 1724785  | 2.76674 |
| VIAYFATVGASK              | Mhc     | Myosin heavy chain, isoform R (EC 3.6.1.3)                                    | 613.843 | 2 | 33.65 | 620379  | 33.48 | 1435185  | 3.0052  |
| AELDDNEDVGPR              | CG32355 | Uncharacterized protein, isoform J (Uncharacterized protein, isoform N)       | 665.299 | 2 | 17.49 | 854844  | 17.49 | 358372   | 0.54459 |
| AGTNDTDPVIEVEPAGVR        | CG32355 | Uncharacterized protein, isoform J (Uncharacterized protein, isoform N)       | 920.458 | 2 | 31.26 | 799045  | 31.12 | 994850   | 1.61737 |
| ELTPFEQELQR               | CG32355 | Uncharacterized protein, isoform J (Uncharacterized protein, isoform N)       | 695.354 | 2 | 34.45 | 1822534 | 34.23 | 951564   | 0.67824 |
| EQRPSLLTTTETQTSR          | CG32355 | Uncharacterized protein, isoform J (Uncharacterized protein, isoform N)       | 582.971 | 3 | 21    | 714722  | 20.97 | 708419   | 1.28758 |
| FATLPSIR                  | CG32355 | Uncharacterized protein, isoform J (Uncharacterized protein, isoform N)       | 452.766 | 2 | 32.1  | 2652917 | 31.93 | 2934962  | 1.43715 |
| FHDLQDAQSTASSGK           | CG32355 | Uncharacterized protein, isoform J (Uncharacterized protein, isoform N)       | 531.25  | 3 | 15.41 | 391086  | 15.36 | 283768   | 0.94257 |
| GADSLILDGHIK              | CG32355 | Uncharacterized protein, isoform J (Uncharacterized protein, isoform N)       | 413.563 | 3 | 29.68 | 1264479 | 29.53 | 1469523  | 1.50969 |
| GFMASAQDR                 | CG32355 | Uncharacterized protein, isoform J (Uncharacterized protein, isoform N)       | 499.722 | 2 | 11.62 | 285875  | 11.75 | 165984   | 0.75424 |
| GISEDNIQLR                | CG32355 | Uncharacterized protein, isoform J (Uncharacterized protein, isoform N)       | 572.801 | 2 | 25.08 | 2302903 | 24.99 | 2379743  | 1.34238 |
| LAELEVER                  | CG32355 | Uncharacterized protein, isoform J (Uncharacterized protein, isoform N)       | 479.764 | 2 | 23.2  | 1227100 | 23.26 | 1368562  | 1.44879 |
| NYQPDFDSQEFQR             | CG32355 | Uncharacterized protein, isoform J (Uncharacterized protein, isoform N)       | 837.363 | 2 | 28.43 | 615106  | 28.34 | 745801   | 1.57505 |
| RPLGPDEQPEIVLLLR          | CG32355 | Uncharacterized protein, isoform J (Uncharacterized protein, isoform N)       | 615.691 | 3 | 45.58 | 1022269 | 45.43 | 642182   | 0.81605 |
| SNLQSGAVINK               | CG32355 | Uncharacterized protein, isoform J (Uncharacterized protein, isoform N)       | 565.812 | 2 | 16.44 | 787854  | 16.41 | 462469   | 0.76253 |
| STASEPTEAEVELK            | CG32355 | Uncharacterized protein, isoform J (Uncharacterized protein, isoform N)       | 745.865 | 2 | 22.94 | 667731  | 22.98 | 801337   | 1.55896 |
| SVEAAQEQDEVDGAR           | CG32355 | Uncharacterized protein, isoform J (Uncharacterized protein, isoform N)       | 802.363 | 2 | 15.1  | 653414  | 15.03 | 773644   | 1.53807 |
| SVSNTFLQPHEDVIVYR         | CG32355 | Uncharacterized protein, isoform J (Uncharacterized protein, isoform N)       | 668.678 | 3 | 35.81 | 2074033 | 35.7  | 1364163  | 0.85442 |
| TDYEIHTSQVDSSALEELPLQPENR | CG32355 | Uncharacterized protein, isoform J (Uncharacterized protein, isoform N)       | 957.793 | 3 | 39.43 | 686104  | 39.2  | 452230   | 0.85623 |
| THEDAQSLPGNSANPSR         | CG32355 | Uncharacterized protein, isoform J (Uncharacterized protein, isoform N)       | 594.278 | 3 | 13.23 | 675781  | 13.53 | 14072906 | 27.052  |
| AAEFNFR                   | wupA    | Wings up A, isoform I                                                         | 427.711 | 2 | 24.96 | 9042040 | 24.95 | 9905750  | 1.42313 |
| AQEINDLNAQVNDLR           | wupA    | Wings up A, isoform I                                                         | 856.932 | 2 | 30.64 | 781036  | 30.48 | 521347   | 0.86712 |
| GFMTPER                   | wupA    | Wings up A, isoform I                                                         | 419.2   | 2 | 19.67 | 1284815 | 19.67 | 1246317  | 1.26012 |
| NLSDASEAELQTICK           | wupA    | Wings up A, isoform I                                                         | 839.901 | 2 | 30.84 | 2095930 | 30.72 | 1850935  | 1.14719 |
| IGGVTLLEILAK              | GS      | Uncharacterized protein, isoform F (EC 1.-.-.) (EC 1.4.1.14) (Uncharacterizec | 557.348 | 2 | 40.98 | 21782   | 40.9  | 251762   | 15.0146 |
| LVSEVGVGVVASGVAK          | GS      | Uncharacterized protein, isoform F (EC 1.-.-.) (EC 1.4.1.14) (Uncharacterizec | 735.93  | 2 | 33.15 | 0       | 33.02 | 197421   | #DIV/0! |
| AELDDNEDVGPR              | CG17926 | Uncharacterized protein, isoform H                                            | 665.299 | 2 | 17.49 | 854844  | 17.49 | 358372   | 0.54459 |
| AGTNDTDPVIEVEPAGVR        | CG17926 | Uncharacterized protein, isoform H                                            | 920.458 | 2 | 31.26 | 799045  | 31.12 | 994850   | 1.61737 |
| ELTPFEQELQR               | CG17926 | Uncharacterized protein, isoform H                                            | 695.354 | 2 | 34.45 | 1822534 | 34.23 | 951564   | 0.67824 |
| EQRPSLLTTTETQTSR          | CG17926 | Uncharacterized protein, isoform H                                            | 582.971 | 3 | 21    | 714722  | 20.97 | 708419   | 1.28758 |
| FATLPSIR                  | CG17926 | Uncharacterized protein, isoform H                                            | 452.766 | 2 | 32.1  | 2652917 | 31.93 | 2934962  | 1.43715 |
| FHDLQDAQSTASSGK           | CG17926 | Uncharacterized protein, isoform H                                            | 531.25  | 3 | 15.41 | 391086  | 15.36 | 283768   | 0.94257 |
| GADSLILDGHIK              | CG17926 | Uncharacterized protein, isoform H                                            | 413.563 | 3 | 29.68 | 1264479 | 29.53 | 1469523  | 1.50969 |
| GFMASAQDR                 | CG17926 | Uncharacterized protein, isoform H                                            | 499.722 | 2 | 11.62 | 285875  | 11.75 | 165984   | 0.75424 |
| GISEDNIQLR                | CG17926 | Uncharacterized protein, isoform H                                            | 572.801 | 2 | 25.08 | 2302903 | 24.99 | 2379743  | 1.34238 |
| LAELEVER                  | CG17926 | Uncharacterized protein, isoform H                                            | 479.764 | 2 | 23.2  | 1227100 | 23.26 | 1368562  | 1.44879 |
| NYQPDFDSQEFQR             | CG17926 | Uncharacterized protein, isoform H                                            | 837.363 | 2 | 28.43 | 615106  | 28.34 | 745801   | 1.57505 |
| RPLGPDEQPEIVLLLR          | CG17926 | Uncharacterized protein, isoform H                                            | 615.691 | 3 | 45.58 | 1022269 | 45.43 | 642182   | 0.81605 |
| SNLQSGAVINK               | CG17926 | Uncharacterized protein, isoform H                                            | 565.812 | 2 | 16.44 | 787854  | 16.41 | 462469   | 0.76253 |
| STASEPTEAEVELK            | CG17926 | Uncharacterized protein, isoform H                                            | 745.865 | 2 | 22.94 | 667731  | 22.98 | 801337   | 1.55896 |
| SVEAAQEQDEVDGAR           | CG17926 | Uncharacterized protein, isoform H                                            | 802.363 | 2 | 15.1  | 653414  | 15.03 | 773644   | 1.53807 |
| SVSNTFLQPHEDVIVYR         | CG17926 | Uncharacterized protein, isoform H                                            | 668.678 | 3 | 35.81 | 2074033 | 35.7  | 1364163  | 0.85442 |
| TDYEIHTSQVDSSALEELPLQPENR | CG17926 | Uncharacterized protein, isoform H                                            | 957.793 | 3 | 39.43 | 686104  | 39.2  | 452230   | 0.85623 |
| THEDAQSLPGNSANPSR         | CG17926 | Uncharacterized protein, isoform H                                            | 594.278 | 3 | 13.23 | 675781  | 13.53 | 14072906 | 27.052  |
| AAAPAAVASPAATADASPSPAI    | Pep     | Protein on ecdysone puffs, isoform D                                          | 708.031 | 3 | 24.27 | 491341  | 24.2  | 1065912  | 2.81813 |
| FFDTEVTAEIHSR             | Pep     | Protein on ecdysone puffs, isoform D                                          | 517.919 | 3 | 32.02 | 935298  | 31.86 | 1657140  | 2.30161 |
| NQNPPSLLDLPR              | Pep     | Protein on ecdysone puffs, isoform D                                          | 682.37  | 2 | 37.75 | 928013  | 37.52 | 1703500  | 2.38457 |
| AQELWELIVK                | up      | Upheld, isoform N                                                             | 614.85  | 2 | 48.34 | 857786  | 48.15 | 594529   | 0.90036 |
| DAGLGLSSAAMER             | up      | Upheld, isoform N                                                             | 647.309 | 2 | 23.24 | 1496095 | 23.26 | 1558348  | 1.35309 |
| IKPLAIEGFGEAK             | up      | Upheld, isoform N                                                             | 458.266 | 3 | 33.5  | 4523125 | 33.37 | 3961091  | 1.13762 |
| ISLSFR                    | up      | Upheld, isoform N                                                             | 361.713 | 2 | 30.22 | 1860854 | 30.16 | 1791066  | 1.25032 |

|                           |         |                                                                                |         |   |       |         |       |          |         |
|---------------------------|---------|--------------------------------------------------------------------------------|---------|---|-------|---------|-------|----------|---------|
| AAEFNFR                   | wupA    | Wings up A, isoform J                                                          | 427.711 | 2 | 24.96 | 9042040 | 24.95 | 9905750  | 1.42313 |
| GFMTPER                   | wupA    | Wings up A, isoform J                                                          | 419.2   | 2 | 19.67 | 1284815 | 19.67 | 1246317  | 1.26012 |
| NLSDASEDTLK               | wupA    | Wings up A, isoform J                                                          | 596.788 | 2 | 18.67 | 925293  | 18.66 | 786155   | 1.1037  |
| DSSVLPVAEQPPAK            | CoRest  | CoRest, isoform J                                                              | 719.383 | 2 | 26.69 | 3357320 | 26.66 | 3402373  | 1.31647 |
| IALSTGGGSSVAEFLAN         | CoRest  | CoRest, isoform J                                                              | 797.41  | 2 | 44.77 | 1725679 | 44.51 | 2728085  | 2.05362 |
| TQTSSEELSAQK              | CoRest  | CoRest, isoform J                                                              | 654.818 | 2 | 11.1  | 1476303 | 11.23 | 860048   | 0.75678 |
| DGVLTVDAPLPALTAGETLIPIAHK | dHspB8  | Uncharacterized protein, isoform C                                             | 838.139 | 3 | 55.9  | 27215   | 55.42 | 322725   | 15.4045 |
| GVNPESIR                  | dHspB8  | Uncharacterized protein, isoform C                                             | 436.235 | 2 | 16.4  | 162532  | 16.45 | 263810   | 2.10851 |
| LALVGGIFNLAAVLR           | FASN2   | Fatty acid synthase 2, isoform B (EC 1.-.-.) (EC 2.3.1.85) (EC 3.1.-.-)        | 763.974 | 2 | 64.23 | 79694   | 63.78 | 0        | 0       |
| GSTGTLGNFAK               | RpS2    | Ribosomal protein S2, isoform B (Ribosomal protein S2, isoform C)              | 526.772 | 2 | 21.67 | 1400654 | 21.69 | 1849774  | 1.71558 |
| GTGIVSAPVPK               | RpS2    | Ribosomal protein S2, isoform B (Ribosomal protein S2, isoform C)              | 513.303 | 2 | 23.48 | 3393633 | 23.45 | 3953923  | 1.51351 |
| TYAYLTPDLWK               | RpS2    | Ribosomal protein S2, isoform B (Ribosomal protein S2, isoform C)              | 685.853 | 2 | 43.29 | 689942  | 43.09 | 916755   | 1.72609 |
| ALLFIPR                   | Hsp83   | Heat shock protein 83, isoform B                                               | 415.268 | 2 | 39.76 | 1322147 | 39.6  | 1321862  | 1.29876 |
| FHTSAGDDFCSLADYVSR        | Hsp83   | Heat shock protein 83, isoform B                                               | 712.309 | 3 | 37.38 | 903559  | 37.17 | 836957   | 1.20329 |
| HFSVEGQLEFR               | Hsp83   | Heat shock protein 83, isoform B                                               | 674.836 | 2 | 31.64 | 477696  | 31.52 | 426943   | 1.16102 |
| HFSVEGQLEFR               | Hsp83   | Heat shock protein 83, isoform B                                               | 450.226 | 3 | 31.72 | 303941  | 31.52 | 380731   | 1.62724 |
| STISINVAGALSILTR          | ens     | Ensconsin, isoform J                                                           | 682.362 | 2 | 25.86 | 816429  | 25.79 | 694557   | 1.10513 |
| DSSLSSGALANLAIFK          | Hn      | Henna, isoform C (EC 1.14.16.1)                                                | 853.97  | 2 | 65.24 | 302707  | 65.18 | 21367    | 0.09169 |
| FANSIPRPFQVLR             | Hn      | Henna, isoform C (EC 1.14.16.1)                                                | 454.254 | 3 | 31.64 | 779696  | 31.6  | 818437   | 1.36359 |
| AELDDNEDVGPR              | CG17926 | Uncharacterized protein, isoform M                                             | 665.299 | 2 | 17.49 | 854844  | 17.49 | 358372   | 0.54459 |
| AGTNDTDPVIEVEPAGVR        | CG17926 | Uncharacterized protein, isoform M                                             | 920.458 | 2 | 31.26 | 799045  | 31.12 | 994850   | 1.61737 |
| ELTPFEQELQR               | CG17926 | Uncharacterized protein, isoform M                                             | 695.354 | 2 | 34.45 | 1822534 | 34.23 | 951564   | 0.67824 |
| EQRPSLLTTTETQTSR          | CG17926 | Uncharacterized protein, isoform M                                             | 582.971 | 3 | 21    | 714722  | 20.97 | 708419   | 1.28758 |
| FHDLQDAQSTASSGK           | CG17926 | Uncharacterized protein, isoform M                                             | 531.25  | 3 | 15.41 | 391086  | 15.36 | 283768   | 0.94257 |
| GADSLILDGHIK              | CG17926 | Uncharacterized protein, isoform M                                             | 413.563 | 3 | 29.68 | 1264479 | 29.53 | 1469523  | 1.50969 |
| GFMASAQDR                 | CG17926 | Uncharacterized protein, isoform M                                             | 499.722 | 2 | 11.62 | 285875  | 11.75 | 165984   | 0.75424 |
| GISEDNIQLR                | CG17926 | Uncharacterized protein, isoform M                                             | 572.801 | 2 | 25.08 | 2302903 | 24.99 | 2379743  | 1.34238 |
| LAELEVER                  | CG17926 | Uncharacterized protein, isoform M                                             | 479.764 | 2 | 23.2  | 1227100 | 23.26 | 1368562  | 1.44879 |
| NYQPFDSDQEFQR             | CG17926 | Uncharacterized protein, isoform M                                             | 837.363 | 2 | 28.43 | 615106  | 28.34 | 745801   | 1.57505 |
| RPLGPDEQPEIVLLL           | CG17926 | Uncharacterized protein, isoform M                                             | 615.691 | 3 | 45.58 | 1022269 | 45.43 | 642182   | 0.81605 |
| SNLQSGAVINK               | CG17926 | Uncharacterized protein, isoform M                                             | 565.812 | 2 | 16.44 | 787854  | 16.41 | 462469   | 0.76253 |
| STASEPTEAIEVELK           | CG17926 | Uncharacterized protein, isoform M                                             | 745.865 | 2 | 22.94 | 667731  | 22.98 | 801337   | 1.55896 |
| SVEAAEQQDEVDGAR           | CG17926 | Uncharacterized protein, isoform M                                             | 802.363 | 2 | 15.1  | 653414  | 15.03 | 773644   | 1.53807 |
| SVSNTFLQPHEDVIVYR         | CG17926 | Uncharacterized protein, isoform M                                             | 668.678 | 3 | 35.81 | 2074033 | 35.7  | 1364163  | 0.85442 |
| TDYEIHTSQVDSSALEELPLQPENR | CG17926 | Uncharacterized protein, isoform M                                             | 957.793 | 3 | 39.43 | 686104  | 39.2  | 452230   | 0.85623 |
| THEDAQSLPGNSANPSR         | CG17926 | Uncharacterized protein, isoform M                                             | 594.278 | 3 | 13.23 | 675781  | 13.53 | 14072906 | 27.052  |
| LAMQVVLHTELER             | TrpA1   | Transient receptor potential cation channel A1, isoform K                      | 518.948 | 3 | 27.31 | 103016  | 27.24 | 1044228  | 13.1678 |
| MLEQQHHLVLR               | TrpA1   | Transient receptor potential cation channel A1, isoform K                      | 430.896 | 3 | 13.31 | 104134  | 13.27 | 657559   | 8.20284 |
| NVIDIQGGGEHGR             | TrpA1   | Transient receptor potential cation channel A1, isoform K                      | 474.908 | 3 | 18.12 | 345514  | 18.16 | 3305973  | 12.4296 |
| SPLLLAASR                 | TrpA1   | Transient receptor potential cation channel A1, isoform K                      | 464.285 | 2 | 29.1  | 430144  | 29.02 | 1188200  | 3.58838 |
| VSVNDFIHK                 | muc     | Dihydrolipoamide acetyltransferase component of pyruvate dehydrogenase cc      | 517.798 | 2 | 38.03 | 442234  | 37.88 | 706401   | 2.07502 |
| VVDGAVAAR                 | muc     | Dihydrolipoamide acetyltransferase component of pyruvate dehydrogenase cc      | 429.246 | 2 | 12.17 | 236652  | 12.23 | 154993   | 0.85079 |
| YEDIPVTNMR                | muc     | Dihydrolipoamide acetyltransferase component of pyruvate dehydrogenase cc      | 627.295 | 2 | 20.92 | 490136  | 20.93 | 697704   | 1.84917 |
| GGGSGTDFYNQQR             | tral    | Trailer hitch, isoform G                                                       | 693.805 | 2 | 16.19 | 310314  | 16.14 | 351936   | 1.47328 |
| DVLSVAFSADNR              | Rack1   | Receptor of activated protein kinase C 1, isoform C (Receptor of activated pro | 647.325 | 2 | 37.28 | 534801  | 37.1  | 522154   | 1.26832 |
| AIGAGGQSTQVR              | Sap130  | Sin3A-associated protein 130, isoform G                                        | 572.807 | 2 | 12.25 | 925618  | 12.32 | 536264   | 0.75261 |
| GPGAGGTALTATNLPTTR        | Sap130  | Sin3A-associated protein 130, isoform G                                        | 828.439 | 2 | 27.36 | 569694  | 27.23 | 266622   | 0.60796 |
| IGDQPATGGAGGR             | Sap130  | Sin3A-associated protein 130, isoform G                                        | 578.789 | 2 | 10.2  | 451645  | 10.33 | 79684    | 0.22919 |
| IIQLQQPATGTTQIIIGSGAR     | Sap130  | Sin3A-associated protein 130, isoform G                                        | 727.738 | 3 | 34.41 | 1767358 | 34.26 | 2314474  | 1.70118 |
| QLENTVATGR                | Sap130  | Sin3A-associated protein 130, isoform G                                        | 544.788 | 2 | 15.37 | 399235  | 15.31 | 452872   | 1.47356 |
| SDGGGGISIAGTPIILSGGTIK    | Sap130  | Sin3A-associated protein 130, isoform G                                        | 929.499 | 2 | 41.44 | 945778  | 41.22 | 943168   | 1.29545 |
| TQITAIPAAPAR              | Sap130  | Sin3A-associated protein 130, isoform G                                        | 605.351 | 2 | 25.4  | 3213530 | 25.35 | 3375310  | 1.36444 |
| VQPSLTITQLNPIGK           | Sap130  | Sin3A-associated protein 130, isoform G                                        | 804.97  | 2 | 41.17 | 1625853 | 40.98 | 1635254  | 1.30655 |

|                           |        |                                                                                  |         |   |       |          |       |          |         |
|---------------------------|--------|----------------------------------------------------------------------------------|---------|---|-------|----------|-------|----------|---------|
| VTHGVASSAASVPATVGPVNSTR   | Sap130 | Sin3A-associated protein 130, isoform G                                          | 722.382 | 3 | 23.81 | 505024   | 23.8  | 708422   | 1.82223 |
| VTTGAGNPQQATASGALVSSFMR   | Sap130 | Sin3A-associated protein 130, isoform G                                          | 756.374 | 3 | 32.37 | 491161   | 32.25 | 670045   | 1.77216 |
| VSVNDFIHK                 | muc    | Dihydrolipoamide acetyltransferase component of pyruvate dehydrogenase cc        | 517.798 | 2 | 38.03 | 442234   | 37.88 | 706401   | 2.07502 |
| VVDGAVAAR                 | muc    | Dihydrolipoamide acetyltransferase component of pyruvate dehydrogenase cc        | 429.246 | 2 | 12.17 | 236652   | 12.23 | 154993   | 0.85079 |
| YEDIPVTNMR                | muc    | Dihydrolipoamide acetyltransferase component of pyruvate dehydrogenase cc        | 627.295 | 2 | 20.92 | 490136   | 20.93 | 697704   | 1.84917 |
| TALHYLLEITAIPIR           | Cpr    | NADPH--cytochrome P450 reductase (CPR) (P450R) (EC 1.6.2.4)                      | 533.635 | 3 | 40.81 | 57301    | 40.62 | 155767   | 3.41796 |
| AATQEIAANVLR              | Dlg5   | Discs large 5, isoform C                                                         | 628.852 | 2 | 39.24 | 4025067  | 39.04 | 5041733  | 1.62716 |
| AAIELNR                   | ninaC  | FI21215p1 (Neither inactivation nor afterpotential C, isoform C) (Neither inacti | 393.727 | 2 | 17.87 | 27934492 | 17.87 | 8147882  | 0.3789  |
| ADLEYKPR                  | ninaC  | FI21215p1 (Neither inactivation nor afterpotential C, isoform C) (Neither inacti | 496.264 | 2 | 14.09 | 8517788  | 14.09 | 3261920  | 0.49747 |
| ADVWALGITTIELADGKPPFADMHP | ninaC  | FI21215p1 (Neither inactivation nor afterpotential C, isoform C) (Neither inacti | 974.832 | 3 | 55.59 | 2262995  | 55.61 | 1325024  | 0.76061 |
| ADVWALGITTIELADGKPPFADMHP | ninaC  | FI21215p1 (Neither inactivation nor afterpotential C, isoform C) (Neither inacti | 731.376 | 4 | 55.55 | 5864969  | 55.61 | 3224204  | 0.71413 |
| ADVWALGITTIELADGKPPFADMHP | ninaC  | FI21215p1 (Neither inactivation nor afterpotential C, isoform C) (Neither inacti | 980.164 | 3 | 53.25 | 2367700  | 53.26 | 1572627  | 0.86282 |
| ADVWALGITTIELADGKPPFADMHP | ninaC  | FI21215p1 (Neither inactivation nor afterpotential C, isoform C) (Neither inacti | 735.375 | 4 | 53.22 | 7293140  | 53.22 | 4530989  | 0.80705 |
| AFTDINR                   | ninaC  | FI21215p1 (Neither inactivation nor afterpotential C, isoform C) (Neither inacti | 418.717 | 2 | 17.64 | 9521909  | 17.64 | 2491073  | 0.33985 |
| AILMLVNAGTPVNNDSTR        | ninaC  | FI21215p1 (Neither inactivation nor afterpotential C, isoform C) (Neither inacti | 943.494 | 2 | 39.58 | 4360804  | 39.35 | 1237694  | 0.3687  |
| AILMLVNAGTPVNNDSTR        | ninaC  | FI21215p1 (Neither inactivation nor afterpotential C, isoform C) (Neither inacti | 629.332 | 3 | 39.61 | 1175945  | 39.7  | 524491   | 0.57939 |
| ALGVLDTVIAR               | ninaC  | FI21215p1 (Neither inactivation nor afterpotential C, isoform C) (Neither inacti | 564.343 | 2 | 40.21 | 85712096 | 40.04 | 54023652 | 0.81877 |
| AMFQIIR                   | ninaC  | FI21215p1 (Neither inactivation nor afterpotential C, isoform C) (Neither inacti | 439.749 | 2 | 35.65 | 17816182 | 35.48 | 11806378 | 0.86084 |
| AVFGDTNIIHDMFGFECFNR      | ninaC  | FI21215p1 (Neither inactivation nor afterpotential C, isoform C) (Neither inacti | 858.735 | 3 | 55.9  | 3358748  | 55.78 | 1202619  | 0.46513 |
| CVLQYCLTFGK               | ninaC  | FI21215p1 (Neither inactivation nor afterpotential C, isoform C) (Neither inacti | 694.839 | 2 | 38.91 | 1761165  | 38.62 | 991756   | 0.73152 |
| DAVASTLYSR                | ninaC  | FI21215p1 (Neither inactivation nor afterpotential C, isoform C) (Neither inacti | 541.777 | 2 | 22.04 | 13835789 | 22.06 | 3379994  | 0.31735 |
| DDPEGNVER                 | ninaC  | FI21215p1 (Neither inactivation nor afterpotential C, isoform C) (Neither inacti | 515.725 | 2 | 9.74  | 412063   | 9.86  | 43490    | 0.1371  |
| DYCDHPNLPEFYGVYK          | ninaC  | FI21215p1 (Neither inactivation nor afterpotential C, isoform C) (Neither inacti | 1008.94 | 2 | 37.72 | 913930   | 37.56 | 316723   | 0.45018 |
| DYCDHPNLPEFYGVYK          | ninaC  | FI21215p1 (Neither inactivation nor afterpotential C, isoform C) (Neither inacti | 672.965 | 3 | 37.72 | 4680463  | 37.56 | 1886732  | 0.52365 |
| FTCLTLLK                  | ninaC  | FI21215p1 (Neither inactivation nor afterpotential C, isoform C) (Neither inacti | 498.283 | 2 | 37.02 | 3865875  | 36.79 | 785519   | 0.26396 |
| GDNILLTK                  | ninaC  | FI21215p1 (Neither inactivation nor afterpotential C, isoform C) (Neither inacti | 437.256 | 2 | 23.96 | 7840105  | 24.03 | 3269877  | 0.54179 |
| HLCYLLGDGNR               | ninaC  | FI21215p1 (Neither inactivation nor afterpotential C, isoform C) (Neither inacti | 602.78  | 2 | 17.48 | 8493956  | 17.49 | 1859001  | 0.28431 |
| HSQFVK                    | ninaC  | FI21215p1 (Neither inactivation nor afterpotential C, isoform C) (Neither inacti | 373.203 | 2 | 9.26  | 4129579  | 9.38  | 1484137  | 0.46686 |
| HTATEISVAHYTGR            | ninaC  | FI21215p1 (Neither inactivation nor afterpotential C, isoform C) (Neither inacti | 771.887 | 2 | 18.64 | 1826203  | 18.65 | 976342   | 0.6945  |
| HTATEISVAHYTGR            | ninaC  | FI21215p1 (Neither inactivation nor afterpotential C, isoform C) (Neither inacti | 514.927 | 3 | 18.67 | 34603876 | 18.61 | 24736648 | 0.92862 |
| INMNMSFPR                 | ninaC  | FI21215p1 (Neither inactivation nor afterpotential C, isoform C) (Neither inacti | 555.265 | 2 | 33.61 | 1257006  | 33.45 | 473494   | 0.48933 |
| INMNMSFPR                 | ninaC  | FI21215p1 (Neither inactivation nor afterpotential C, isoform C) (Neither inacti | 563.263 | 2 | 24.81 | 6223789  | 24.72 | 1413809  | 0.29509 |
| INMNMSFPR                 | ninaC  | FI21215p1 (Neither inactivation nor afterpotential C, isoform C) (Neither inacti | 571.26  | 2 | 17.71 | 1092556  | 17.64 | 317990   | 0.37809 |
| IQHYDEEHQVSIEEEYR         | ninaC  | FI21215p1 (Neither inactivation nor afterpotential C, isoform C) (Neither inacti | 735.335 | 3 | 21.82 | 9144805  | 21.85 | 3841429  | 0.54568 |
| IQHYDEEHQVSIEEEYR         | ninaC  | FI21215p1 (Neither inactivation nor afterpotential C, isoform C) (Neither inacti | 551.753 | 4 | 21.82 | 11296823 | 21.81 | 5372007  | 0.61774 |
| LPFDEFRLR                 | ninaC  | FI21215p1 (Neither inactivation nor afterpotential C, isoform C) (Neither inacti | 518.777 | 2 | 45.35 | 37304816 | 45.13 | 12833087 | 0.44688 |
| LYELQVK                   | ninaC  | FI21215p1 (Neither inactivation nor afterpotential C, isoform C) (Neither inacti | 446.761 | 2 | 26.36 | 7134839  | 26.31 | 1279726  | 0.233   |
| MDEALAAVR                 | ninaC  | FI21215p1 (Neither inactivation nor afterpotential C, isoform C) (Neither inacti | 496.247 | 2 | 19.06 | 919808   | 19.09 | 435944   | 0.61568 |
| MLSQANLGVHFVR             | ninaC  | FI21215p1 (Neither inactivation nor afterpotential C, isoform C) (Neither inacti | 529.28  | 3 | 31.04 | 3025753  | 30.96 | 721657   | 0.30983 |
| MLSQANLGVHFVR             | ninaC  | FI21215p1 (Neither inactivation nor afterpotential C, isoform C) (Neither inacti | 534.612 | 3 | 28.76 | 906685   | 28.64 | 111527   | 0.15979 |
| MYPEDLAALENPVDENIIESLR    | ninaC  | FI21215p1 (Neither inactivation nor afterpotential C, isoform C) (Neither inacti | 1266.12 | 2 | 55.67 | 1021590  | 55.37 | 543268   | 0.69081 |
| MYPEDLAALENPVDENIIESLR    | ninaC  | FI21215p1 (Neither inactivation nor afterpotential C, isoform C) (Neither inacti | 844.416 | 3 | 55.74 | 3400744  | 55.49 | 1974218  | 0.75413 |
| MYPEDLAALENPVDENIIESLR    | ninaC  | FI21215p1 (Neither inactivation nor afterpotential C, isoform C) (Neither inacti | 1274.12 | 2 | 53.98 | 1115935  | 53.78 | 538899   | 0.62732 |
| MYPEDLAALENPVDENIIESLR    | ninaC  | FI21215p1 (Neither inactivation nor afterpotential C, isoform C) (Neither inacti | 849.748 | 3 | 54.05 | 4350341  | 53.78 | 2829471  | 0.8449  |
| NHVLHR                    | ninaC  | FI21215p1 (Neither inactivation nor afterpotential C, isoform C) (Neither inacti | 388.22  | 2 | 7.47  | 3112849  | 7.55  | 783942   | 0.32715 |
| NPPPTLMRPTNWSQQINDFISESLE | ninaC  | FI21215p1 (Neither inactivation nor afterpotential C, isoform C) (Neither inacti | 1014.84 | 3 | 55.94 | 2051910  | 55.85 | 1795906  | 1.13697 |
| NPPPTLMRPTNWSQQINDFISESLE | ninaC  | FI21215p1 (Neither inactivation nor afterpotential C, isoform C) (Neither inacti | 1020.17 | 3 | 52.77 | 5616241  | 52.6  | 3954417  | 0.91466 |
| QYTDEAR                   | ninaC  | FI21215p1 (Neither inactivation nor afterpotential C, isoform C) (Neither inacti | 499.233 | 2 | 9.23  | 582523   | 9.39  | 114303   | 0.2549  |
| SCQDQDLIMDR               | ninaC  | FI21215p1 (Neither inactivation nor afterpotential C, isoform C) (Neither inacti | 690.798 | 2 | 23.63 | 8294816  | 23.65 | 3307863  | 0.51804 |
| SCQDQDLIMDR               | ninaC  | FI21215p1 (Neither inactivation nor afterpotential C, isoform C) (Neither inacti | 698.795 | 2 | 18.85 | 5333858  | 18.8  | 2256882  | 0.54965 |
| SFHSDVVQQQMK              | ninaC  | FI21215p1 (Neither inactivation nor afterpotential C, isoform C) (Neither inacti | 717.346 | 2 | 18.46 | 3748466  | 18.46 | 2122639  | 0.73561 |
| SFHSDVVQQQMK              | ninaC  | FI21215p1 (Neither inactivation nor afterpotential C, isoform C) (Neither inacti | 478.566 | 3 | 18.46 | 11674488 | 18.42 | 8562709  | 0.95279 |
| SFHSDVVQQQMK              | ninaC  | FI21215p1 (Neither inactivation nor afterpotential C, isoform C) (Neither inacti | 725.343 | 2 | 13.74 | 1001280  | 13.67 | 558782   | 0.72495 |

|                           |         |                                                                                  |         |   |       |          |       |          |         |
|---------------------------|---------|----------------------------------------------------------------------------------|---------|---|-------|----------|-------|----------|---------|
| SFHSDVVQQQMK              | ninaC   | FI21215p1 (Neither inactivation nor afterpotential C, isoform C) (Neither inacti | 483.898 | 3 | 13.74 | 2486371  | 13.7  | 1898734  | 0.99202 |
| SSLDESIMLMFTNQLTK         | ninaC   | FI21215p1 (Neither inactivation nor afterpotential C, isoform C) (Neither inacti | 979.484 | 2 | 58.98 | 726179   | 58.79 | 934663   | 1.67199 |
| SSLDESIMLMFTNQLTK         | ninaC   | FI21215p1 (Neither inactivation nor afterpotential C, isoform C) (Neither inacti | 653.325 | 3 | 58.9  | 731597   | 58.75 | 1150737  | 2.04327 |
| SSLDESIMLMFTNQLTK         | ninaC   | FI21215p1 (Neither inactivation nor afterpotential C, isoform C) (Neither inacti | 987.482 | 2 | 52.23 | 1067574  | 51.98 | 1917715  | 2.3335  |
| SSLDESIMLMFTNQLTK         | ninaC   | FI21215p1 (Neither inactivation nor afterpotential C, isoform C) (Neither inacti | 658.657 | 3 | 52.23 | 889198   | 51.98 | 1157228  | 1.69061 |
| SYALNTLSAGCISQVNNLR       | ninaC   | FI21215p1 (Neither inactivation nor afterpotential C, isoform C) (Neither inacti | 1041.03 | 2 | 38.84 | 1038066  | 38.54 | 265120   | 0.33177 |
| SYALNTLSAGCISQVNNLR       | ninaC   | FI21215p1 (Neither inactivation nor afterpotential C, isoform C) (Neither inacti | 694.353 | 3 | 38.76 | 1954606  | 38.58 | 912018   | 0.60613 |
| TALDNLLTKPDGLFYIIDDASR    | ninaC   | FI21215p1 (Neither inactivation nor afterpotential C, isoform C) (Neither inacti | 1226.14 | 2 | 58.41 | 1814072  | 58.25 | 838256   | 0.60027 |
| TALDNLLTKPDGLFYIIDDASR    | ninaC   | FI21215p1 (Neither inactivation nor afterpotential C, isoform C) (Neither inacti | 817.764 | 3 | 58.41 | 21971862 | 58.25 | 11525014 | 0.68139 |
| TLAANFR                   | ninaC   | FI21215p1 (Neither inactivation nor afterpotential C, isoform C) (Neither inacti | 396.722 | 2 | 20.39 | 6184618  | 20.39 | 1161221  | 0.24391 |
| VATTDGTQHNHFIFYYFYDFINQQN | ninaC   | FI21215p1 (Neither inactivation nor afterpotential C, isoform C) (Neither inacti | 863.914 | 4 | 56.09 | 1522872  | 55.61 | 34117    | 0.0291  |
| YYNDEFLAR                 | ninaC   | FI21215p1 (Neither inactivation nor afterpotential C, isoform C) (Neither inacti | 595.777 | 2 | 28.3  | 10393152 | 28.23 | 1903322  | 0.2379  |
| VSVNDFIHK                 | muc     | Midline uncoordinated, isoform D (EC 2.3.1.12)                                   | 517.798 | 2 | 38.03 | 442234   | 37.88 | 706401   | 2.07502 |
| VVDGAVAR                  | muc     | Midline uncoordinated, isoform D (EC 2.3.1.12)                                   | 429.246 | 2 | 12.17 | 236652   | 12.23 | 154993   | 0.85079 |
| YEDIPVTNMR                | muc     | Midline uncoordinated, isoform D (EC 2.3.1.12)                                   | 627.295 | 2 | 20.92 | 490136   | 20.93 | 697704   | 1.84917 |
| IGGVTLLEILAK              | CG9674  | Uncharacterized protein, isoform E (Uncharacterized protein, isoform H) (EC      | 557.348 | 2 | 40.98 | 21782    | 40.9  | 251762   | 15.0146 |
| LVSEVGVGVVASGVAK          | CG9674  | Uncharacterized protein, isoform E (Uncharacterized protein, isoform H) (EC      | 735.93  | 2 | 33.15 | 0        | 33.02 | 197421   | #DIV/0! |
| LTTNMFALGYTTK             | porin   | Porin, isoform D (Porin, isoform E)                                              | 722.378 | 2 | 31.55 | 326396   | 31.43 | 582312   | 2.31757 |
| VFGSLETK                  | porin   | Porin, isoform D (Porin, isoform E)                                              | 440.742 | 2 | 21.81 | 305180   | 21.82 | 380085   | 1.61788 |
| VNNASQVGLGYQQK            | porin   | Porin, isoform D (Porin, isoform E)                                              | 753.389 | 2 | 19.18 | 385340   | 19.14 | 400935   | 1.35161 |
| YQLDDASVR                 | porin   | Porin, isoform D (Porin, isoform E)                                              | 591.275 | 2 | 20.06 | 853548   | 20.05 | 1199040  | 1.82485 |
| AATQEIAANVLR              | Dlg5    | Discs large 5, isoform D                                                         | 628.852 | 2 | 39.24 | 4025067  | 39.04 | 5041733  | 1.62716 |
| STISNVAGASLTR             | ens     | Enscnslin, isoform K                                                             | 682.362 | 2 | 25.86 | 816429   | 25.79 | 694557   | 1.10513 |
| LSDVTVTPIPR               | CDK2AP  | CDK2-associated protein 1, isoform B                                             | 599.346 | 2 | 29.17 | 1997051  | 29.1  | 2367705  | 1.54014 |
| SQVQNFYNYQQQR             | CDK2AP  | CDK2-associated protein 1, isoform B                                             | 851.9   | 2 | 23.81 | 499679   | 23.84 | 647495   | 1.68332 |
| STISNVAGASLTR             | ens     | Enscnslin, isoform I                                                             | 682.362 | 2 | 25.86 | 816429   | 25.79 | 694557   | 1.10513 |
| VTAVIPCFPYAR              | Prps    | Uncharacterized protein, isoform F (EC 2.7.6.1)                                  | 697.368 | 2 | 40.66 | 474085   | 40.36 | 413943   | 1.13424 |
| VYAILTHGIFSGPAISR         | Prps    | Uncharacterized protein, isoform F (EC 2.7.6.1)                                  | 601.337 | 3 | 42.95 | 672496   | 42.83 | 628268   | 1.21361 |
| AASPASSVSSLSR             | Gug     | Grunge, isoform I (EC 3.5.1.98)                                                  | 610.317 | 2 | 19.87 | 670193   | 19.91 | 1047675  | 2.03072 |
| ALQALVK                   | Gug     | Grunge, isoform I (EC 3.5.1.98)                                                  | 371.745 | 2 | 22.24 | 1429410  | 22.24 | 802676   | 0.72947 |
| ASPSVQISSSSGGPSGPGSVGPGC  | Gug     | Grunge, isoform I (EC 3.5.1.98)                                                  | 862.663 | 4 | 27.81 | 128265   | 27.69 | 91817    | 0.9299  |
| MYAPQPGQR                 | Gug     | Grunge, isoform I (EC 3.5.1.98)                                                  | 532.253 | 2 | 11.22 | 597570   | 11.23 | 396368   | 0.86165 |
| QHQAIAAAAAAQHK            | Gug     | Grunge, isoform I (EC 3.5.1.98)                                                  | 477.58  | 3 | 7.39  | 102108   | 7.46  | 61942    | 0.78804 |
| QSLHDQYFR                 | Gug     | Grunge, isoform I (EC 3.5.1.98)                                                  | 398.528 | 3 | 18.86 | 599467   | 18.89 | 746793   | 1.61829 |
| SQSAIFVR                  | Gug     | Grunge, isoform I (EC 3.5.1.98)                                                  | 454.253 | 2 | 22.57 | 2827859  | 22.59 | 2397174  | 1.10119 |
| WSPGVVADGDLLMFLR          | Gug     | Grunge, isoform I (EC 3.5.1.98)                                                  | 888.461 | 2 | 59.21 | 701351   | 58.95 | 433086   | 0.80216 |
| WSPGVVADGDLLMFLR          | Gug     | Grunge, isoform I (EC 3.5.1.98)                                                  | 896.459 | 2 | 56.45 | 1934292  | 56.29 | 935150   | 0.62803 |
| YGDPLAAK                  | Gug     | Grunge, isoform I (EC 3.5.1.98)                                                  | 417.721 | 2 | 19.02 | 1065996  | 19    | 938830   | 1.14407 |
| AELDDNEDVGR               | CG32355 | Uncharacterized protein, isoform K                                               | 665.299 | 2 | 17.49 | 854844   | 17.49 | 358372   | 0.54459 |
| AGTNDTDPVIEVEPAGVR        | CG32355 | Uncharacterized protein, isoform K                                               | 920.458 | 2 | 31.26 | 799045   | 31.12 | 994850   | 1.61737 |
| ELTPFEQELQR               | CG32355 | Uncharacterized protein, isoform K                                               | 695.354 | 2 | 34.45 | 1822534  | 34.23 | 951564   | 0.67824 |
| EQRPSSLTTTETQTSR          | CG32355 | Uncharacterized protein, isoform K                                               | 582.971 | 3 | 21    | 714722   | 20.97 | 708419   | 1.28758 |
| FHDLQDAQSTASSGK           | CG32355 | Uncharacterized protein, isoform K                                               | 531.25  | 3 | 15.41 | 391086   | 15.36 | 283768   | 0.94257 |
| GADSLILDGHIK              | CG32355 | Uncharacterized protein, isoform K                                               | 413.563 | 3 | 29.68 | 1264479  | 29.53 | 1469523  | 1.50969 |
| GFMASAQDR                 | CG32355 | Uncharacterized protein, isoform K                                               | 499.722 | 2 | 11.62 | 285875   | 11.75 | 165984   | 0.75424 |
| GISEDNIQLR                | CG32355 | Uncharacterized protein, isoform K                                               | 572.801 | 2 | 25.08 | 2302903  | 24.99 | 2379743  | 1.34238 |
| LAELEVER                  | CG32355 | Uncharacterized protein, isoform K                                               | 479.764 | 2 | 23.2  | 1227100  | 23.26 | 1368562  | 1.44879 |
| NYQPDFDSQEFQR             | CG32355 | Uncharacterized protein, isoform K                                               | 837.363 | 2 | 28.43 | 615106   | 28.34 | 745801   | 1.57505 |
| RPLGPDPEIQPEIVLLLR        | CG32355 | Uncharacterized protein, isoform K                                               | 615.691 | 3 | 45.58 | 1022269  | 45.43 | 642182   | 0.81605 |
| SNLQSGAVINK               | CG32355 | Uncharacterized protein, isoform K                                               | 565.812 | 2 | 16.44 | 787854   | 16.41 | 462469   | 0.76253 |
| STASEPTEAEVELK            | CG32355 | Uncharacterized protein, isoform K                                               | 745.865 | 2 | 22.94 | 667731   | 22.98 | 801337   | 1.55896 |
| SVEAAEQQDEVDGAR           | CG32355 | Uncharacterized protein, isoform K                                               | 802.363 | 2 | 15.1  | 653414   | 15.03 | 773644   | 1.53807 |
| SVSNTFLQPHEDVIVYR         | CG32355 | Uncharacterized protein, isoform K                                               | 668.678 | 3 | 35.81 | 2074033  | 35.7  | 1364163  | 0.85442 |

|                             |           |                                                                                      |         |   |       |          |       |          |         |
|-----------------------------|-----------|--------------------------------------------------------------------------------------|---------|---|-------|----------|-------|----------|---------|
| TDYEIHTSQVDSSALEELPLQPENR   | CG32355   | Uncharacterized protein, isoform K                                                   | 957.793 | 3 | 39.43 | 686104   | 39.2  | 452230   | 0.85623 |
| THEDAQSLPGNSANPSR           | CG32355   | Uncharacterized protein, isoform K                                                   | 594.278 | 3 | 13.23 | 675781   | 13.53 | 14072906 | 27.052  |
| ANAVAAPFR                   | simj      | Simjang, isoform D                                                                   | 458.754 | 2 | 21.85 | 720615   | 21.82 | 738030   | 1.33043 |
| GSLSVTP TSAVPLPAHSK         | simj      | Simjang, isoform D                                                                   | 583.656 | 3 | 30.14 | 968499   | 29.97 | 1592607  | 2.13615 |
| SSLPAGATLAAGTTITPATSSSHR    | simj      | Simjang, isoform D                                                                   | 752.392 | 3 | 30.52 | 3143778  | 30.4  | 4148506  | 1.7142  |
| SSLSGSGGPAVSISATNSR         | simj      | Simjang, isoform D                                                                   | 867.934 | 2 | 24.08 | 1895042  | 24.04 | 2008027  | 1.37649 |
| TNLPNLTITPSVTITPTSAPPSSLKPF | simj      | Simjang, isoform D                                                                   | 935.19  | 3 | 42.52 | 2161882  | 42.25 | 1939128  | 1.16519 |
| VTAVIPCFPYAR                | Prps      | Uncharacterized protein, isoform C (EC 2.7.6.1) (Uncharacterized protein, isoform C) | 697.368 | 2 | 40.66 | 474085   | 40.36 | 413943   | 1.13424 |
| VYAILTHGIFSGPAISR           | Prps      | Uncharacterized protein, isoform C (EC 2.7.6.1) (Uncharacterized protein, isoform C) | 601.337 | 3 | 42.95 | 672496   | 42.83 | 628268   | 1.21361 |
| GGGSGTDFYNQQR               | tral      | Trailer hitch, isoform C                                                             | 693.805 | 2 | 16.19 | 310314   | 16.14 | 351936   | 1.47328 |
| LVSQDNFGFDLAAVEAAAK         | beta-Spec | Spectrin beta chain                                                                  | 983.499 | 2 | 48.76 | 272064   | 48.5  | 351415   | 1.67792 |
| VAVVNQLAR                   | beta-Spec | Spectrin beta chain                                                                  | 485.296 | 2 | 22.75 | 392366   | 22.71 | 672076   | 2.2251  |
| YATSQDES YR                 | beta-Spec | Spectrin beta chain                                                                  | 610.265 | 2 | 11.39 | 127721   | 11.46 | 145286   | 1.47769 |
| GGGSGTDFYNQQR               | tral      | Trailer hitch, isoform H                                                             | 693.805 | 2 | 16.19 | 310314   | 16.14 | 351936   | 1.47328 |
| VTAVIPCFPYAR                | Prps      | Uncharacterized protein, isoform G (EC 2.7.6.1) (Uncharacterized protein, isoform G) | 697.368 | 2 | 40.66 | 474085   | 40.36 | 413943   | 1.13424 |
| VYAILTHGIFSGPAISR           | Prps      | Uncharacterized protein, isoform G (EC 2.7.6.1) (Uncharacterized protein, isoform G) | 601.337 | 3 | 42.95 | 672496   | 42.83 | 628268   | 1.21361 |
| ANAVAAPFR                   | simj      | Simjang, isoform E                                                                   | 458.754 | 2 | 21.85 | 720615   | 21.82 | 738030   | 1.33043 |
| GSLSVTP TSAVPLPAHSK         | simj      | Simjang, isoform E                                                                   | 583.656 | 3 | 30.14 | 968499   | 29.97 | 1592607  | 2.13615 |
| SSLPAGATLAAGTTITPATSSSHR    | simj      | Simjang, isoform E                                                                   | 752.392 | 3 | 30.52 | 3143778  | 30.4  | 4148506  | 1.7142  |
| SSLSGSGGPAVSISATNSR         | simj      | Simjang, isoform E                                                                   | 867.934 | 2 | 24.08 | 1895042  | 24.04 | 2008027  | 1.37649 |
| TNLPNLTITPSVTITPTSAPPSSLKPF | simj      | Simjang, isoform E                                                                   | 935.19  | 3 | 42.52 | 2161882  | 42.25 | 1939128  | 1.16519 |
| GGGSGTDFYNQQR               | tral      | Trailer hitch, isoform E                                                             | 693.805 | 2 | 16.19 | 310314   | 16.14 | 351936   | 1.47328 |
| GGGSGTDFYNQQR               | tral      | Trailer hitch, isoform D                                                             | 693.805 | 2 | 16.19 | 310314   | 16.14 | 351936   | 1.47328 |
| GGGSGTDFYNQQR               | tral      | Trailer hitch, isoform I                                                             | 693.805 | 2 | 16.19 | 310314   | 16.14 | 351936   | 1.47328 |
| AGFAGDDAPR                  | Act79B    | Actin 79B, isoform B                                                                 | 488.728 | 2 | 15.06 | 5346544  | 15.03 | 6072874  | 1.47551 |
| AVFPSIVGRPR                 | Act79B    | Actin 79B, isoform B                                                                 | 599.856 | 2 | 30.18 | 3527039  | 29.97 | 6233553  | 2.29587 |
| SYELPDGQVITIGNER            | Act79B    | Actin 79B, isoform B                                                                 | 895.95  | 2 | 39.17 | 5791673  | 39    | 8517636  | 1.91046 |
| SYELPDGQVITIGNER            | Act79B    | Actin 79B, isoform B                                                                 | 597.635 | 3 | 39.17 | 427938   | 38.97 | 800279   | 2.42931 |
| TTGIVLDSDGDVSHTVPIYEGYALPI  | Act79B    | Actin 79B, isoform B                                                                 | 1051.22 | 3 | 45.78 | 1749429  | 45.58 | 1016220  | 0.75459 |
| VAPEEHPVLLTEAPLNPK          | Act79B    | Actin 79B, isoform B                                                                 | 977.536 | 2 | 34.25 | 620752   | 34.11 | 748708   | 1.56681 |
| VAPEEHPVLLTEAPLNPK          | Act79B    | Actin 79B, isoform B                                                                 | 652.026 | 3 | 34.21 | 12031327 | 34.11 | 16999678 | 1.83548 |
| DITEASIWDSYVLPK             | RpS26     | 40S ribosomal protein S26                                                            | 868.941 | 2 | 48.98 | 315622   | 48.7  | 205408   | 0.84542 |
| LTSSHLTQFGTVENANTPGATAR     | G9a       | G9a, isoform B (EC 2.1.1.43)                                                         | 825.414 | 3 | 27.32 | 294736   | 27.19 | 352075   | 1.55176 |
| NFSGAELEGLVR                | comt      | Comatose, isoform B (EC 3.6.1.3)                                                     | 646.336 | 2 | 38.11 | 673204   | 37.95 | 671954   | 1.29663 |
| TVEVPSGYVGFSLVQR            | comt      | Comatose, isoform B (EC 3.6.1.3)                                                     | 869.462 | 2 | 42.95 | 482529   | 43.06 | 1159918  | 3.12267 |
| AFIVKPIPSPEVIPVIVFINPK      | rdgA      | Diacylglycerol kinase (DAG kinase) (EC 2.7.1.107)                                    | 806.491 | 3 | 58.34 | 7861730  | 58.25 | 6537246  | 1.08019 |
| AFIVKPIPSPEVIPVIVFINPK      | rdgA      | Diacylglycerol kinase (DAG kinase) (EC 2.7.1.107)                                    | 605.12  | 4 | 58.3  | 339552   | 58.29 | 268976   | 1.02903 |
| ALGWGGGYTDEPIGK             | rdgA      | Diacylglycerol kinase (DAG kinase) (EC 2.7.1.107)                                    | 760.873 | 2 | 33.66 | 1454790  | 33.49 | 1166978  | 1.04204 |
| ALHEQGYSLSQSVNK             | rdgA      | Diacylglycerol kinase (DAG kinase) (EC 2.7.1.107)                                    | 525.27  | 3 | 20.1  | 844926   | 20.13 | 448176   | 0.68905 |
| FEESISYPK                   | rdgA      | Diacylglycerol kinase (DAG kinase) (EC 2.7.1.107)                                    | 550.269 | 2 | 25.08 | 699628   | 25.06 | 249796   | 0.46381 |
| FQHLLNPR                    | rdgA      | Diacylglycerol kinase (DAG kinase) (EC 2.7.1.107)                                    | 512.788 | 2 | 19.99 | 2182798  | 19.93 | 880908   | 0.52425 |
| GDVQVNP L EK                | rdgA      | Diacylglycerol kinase (DAG kinase) (EC 2.7.1.107)                                    | 549.793 | 2 | 22.75 | 2434720  | 22.76 | 798326   | 0.42595 |
| GGPSTDEDLQIGSKPIK           | rdgA      | Diacylglycerol kinase (DAG kinase) (EC 2.7.1.107)                                    | 581.304 | 3 | 23.2  | 1491415  | 23.18 | 425538   | 0.37065 |
| LGNYAPIVPPSVIVK             | rdgA      | Diacylglycerol kinase (DAG kinase) (EC 2.7.1.107)                                    | 884.014 | 2 | 52.63 | 3322956  | 52.44 | 1330008  | 0.51994 |
| QVFDLTQGGPK                 | rdgA      | Diacylglycerol kinase (DAG kinase) (EC 2.7.1.107)                                    | 595.314 | 2 | 28.22 | 3580063  | 28.2  | 2623698  | 0.95202 |
| SFAAFSQR                    | rdgA      | Diacylglycerol kinase (DAG kinase) (EC 2.7.1.107)                                    | 457.23  | 2 | 23.28 | 6655876  | 23.37 | 6106585  | 1.19183 |
| TIPMQVDGEACR                | rdgA      | Diacylglycerol kinase (DAG kinase) (EC 2.7.1.107)                                    | 688.818 | 2 | 23.21 | 1029594  | 23.29 | 655361   | 0.82687 |
| TIPMQVDGEACR                | rdgA      | Diacylglycerol kinase (DAG kinase) (EC 2.7.1.107)                                    | 696.816 | 2 | 17.7  | 628084   | 17.41 | 337537   | 0.69811 |
| VKPSVIEIELLNK               | rdgA      | Diacylglycerol kinase (DAG kinase) (EC 2.7.1.107)                                    | 741.451 | 2 | 38.07 | 1106361  | 37.96 | 617198   | 0.72469 |
| VKPSVIEIELLNK               | rdgA      | Diacylglycerol kinase (DAG kinase) (EC 2.7.1.107)                                    | 494.636 | 3 | 38.07 | 3645006  | 37.92 | 2591446  | 0.92356 |
| VSQDWCFIDSCTAEHYFR          | rdgA      | Diacylglycerol kinase (DAG kinase) (EC 2.7.1.107)                                    | 774.33  | 3 | 41.88 | 500902   | 41.72 | 464633   | 1.20498 |
| VTPNDDVTDDHVDR              | rdgA      | Diacylglycerol kinase (DAG kinase) (EC 2.7.1.107)                                    | 533.241 | 3 | 14.64 | 1483070  | 14.56 | 900190   | 0.78849 |
| YIIASATR                    | rdgA      | Diacylglycerol kinase (DAG kinase) (EC 2.7.1.107)                                    | 447.756 | 2 | 19.6  | 1081315  | 19.55 | 314198   | 0.37746 |

|                          |           |                                                                     |         |   |       |         |       |         |         |
|--------------------------|-----------|---------------------------------------------------------------------|---------|---|-------|---------|-------|---------|---------|
| STISISNVAGASLTR          | ens       | Ensconsin, isoform G                                                | 682.362 | 2 | 25.86 | 816429  | 25.79 | 694557  | 1.10513 |
| AFIVKPIPSPEVIPVIVFINPK   | rdgA      | Diacylglycerol kinase (DAG kinase) (EC 2.7.1.107)                   | 806.491 | 3 | 58.34 | 7861730 | 58.25 | 6537246 | 1.08019 |
| AFIVKPIPSPEVIPVIVFINPK   | rdgA      | Diacylglycerol kinase (DAG kinase) (EC 2.7.1.107)                   | 605.12  | 4 | 58.3  | 339552  | 58.29 | 268976  | 1.02903 |
| ALHEQGYSLQSVNK           | rdgA      | Diacylglycerol kinase (DAG kinase) (EC 2.7.1.107)                   | 525.27  | 3 | 20.1  | 844926  | 20.13 | 448176  | 0.68905 |
| FEESISYPK                | rdgA      | Diacylglycerol kinase (DAG kinase) (EC 2.7.1.107)                   | 550.269 | 2 | 25.08 | 699628  | 25.06 | 249796  | 0.46381 |
| FQHLLNPR                 | rdgA      | Diacylglycerol kinase (DAG kinase) (EC 2.7.1.107)                   | 512.788 | 2 | 19.99 | 2182798 | 19.93 | 880908  | 0.52425 |
| GDVQVNPLEK               | rdgA      | Diacylglycerol kinase (DAG kinase) (EC 2.7.1.107)                   | 549.793 | 2 | 22.75 | 2434720 | 22.76 | 798326  | 0.42595 |
| GPGSTDEDLQIGSKPIK        | rdgA      | Diacylglycerol kinase (DAG kinase) (EC 2.7.1.107)                   | 581.304 | 3 | 23.2  | 1491415 | 23.18 | 425538  | 0.37065 |
| LGNYAPIIIVPPSWIVK        | rdgA      | Diacylglycerol kinase (DAG kinase) (EC 2.7.1.107)                   | 884.014 | 2 | 52.63 | 3322956 | 52.44 | 1330008 | 0.51994 |
| QVFDLTQGGPK              | rdgA      | Diacylglycerol kinase (DAG kinase) (EC 2.7.1.107)                   | 595.314 | 2 | 28.22 | 3580063 | 28.2  | 2623698 | 0.95202 |
| SFAAFSQR                 | rdgA      | Diacylglycerol kinase (DAG kinase) (EC 2.7.1.107)                   | 457.23  | 2 | 23.28 | 6655876 | 23.37 | 6106585 | 1.19183 |
| TIPMQVDGEACR             | rdgA      | Diacylglycerol kinase (DAG kinase) (EC 2.7.1.107)                   | 688.818 | 2 | 23.21 | 1029594 | 23.29 | 655331  | 0.82687 |
| TIPMQVDGEACR             | rdgA      | Diacylglycerol kinase (DAG kinase) (EC 2.7.1.107)                   | 696.816 | 2 | 17.7  | 628084  | 17.41 | 337537  | 0.69811 |
| VKPSVIEIELLNK            | rdgA      | Diacylglycerol kinase (DAG kinase) (EC 2.7.1.107)                   | 741.451 | 2 | 38.07 | 1106361 | 37.96 | 617198  | 0.72469 |
| VKPSVIEIELLNK            | rdgA      | Diacylglycerol kinase (DAG kinase) (EC 2.7.1.107)                   | 494.636 | 3 | 38.07 | 3645006 | 37.92 | 2591446 | 0.92356 |
| VSQDWCFIDSCTAEHYFR       | rdgA      | Diacylglycerol kinase (DAG kinase) (EC 2.7.1.107)                   | 774.33  | 3 | 41.88 | 500902  | 41.72 | 464633  | 1.20498 |
| VTPNDDVTDDHVDR           | rdgA      | Diacylglycerol kinase (DAG kinase) (EC 2.7.1.107)                   | 533.241 | 3 | 14.64 | 1483070 | 14.56 | 900190  | 0.78849 |
| YIIASATR                 | rdgA      | Diacylglycerol kinase (DAG kinase) (EC 2.7.1.107)                   | 447.756 | 2 | 19.6  | 1081315 | 19.55 | 314198  | 0.37746 |
| LVSQDNFGFDLAAVEAAAK      | beta-Spec | Spectrin beta chain                                                 | 983.499 | 2 | 48.76 | 272064  | 48.5  | 351415  | 1.67792 |
| VAVVNQLAR                | beta-Spec | Spectrin beta chain                                                 | 485.296 | 2 | 22.75 | 392366  | 22.71 | 672076  | 2.2251  |
| YATSQDESYR               | beta-Spec | Spectrin beta chain                                                 | 610.265 | 2 | 11.39 | 127721  | 11.46 | 145286  | 1.47769 |
| AQELWELVK                | up        | Upheld, isoform P                                                   | 614.85  | 2 | 48.34 | 857786  | 48.15 | 594529  | 0.90036 |
| DAGVLGLSSAAMER           | up        | Upheld, isoform P                                                   | 696.843 | 2 | 30.26 | 1579477 | 30.2  | 1875543 | 1.54254 |
| IKPLAIEGFGEAK            | up        | Upheld, isoform P                                                   | 458.266 | 3 | 33.5  | 4523125 | 33.37 | 3961091 | 1.13762 |
| ISLSFR                   | up        | Upheld, isoform P                                                   | 361.713 | 2 | 30.22 | 1860854 | 30.16 | 1791066 | 1.25032 |
| IAAEVAAPLAK              | Flo2      | Flotillin 2, isoform J                                              | 527.319 | 2 | 25.68 | 101116  | 25.6  | 592504  | 7.61191 |
| AGGEVLTFDQLALR           | RpL18     | Ribosomal protein L18, isoform B (Ribosomal protein L18, isoform C) | 745.404 | 2 | 43.73 | 1193950 | 43.51 | 848280  | 0.92294 |
| LTVCALHVTQTAR            | RpL18     | Ribosomal protein L18, isoform B (Ribosomal protein L18, isoform C) | 490.601 | 3 | 26.12 | 441082  | 25.98 | 561270  | 1.65301 |
| VYSPHVLNLTLDLPGLTK       | shi       | Shibire, isoform N                                                  | 698.405 | 3 | 53.41 | 463587  | 53.25 | 477207  | 1.3372  |
| AQELWELVK                | up        | Upheld, isoform O                                                   | 614.85  | 2 | 48.34 | 857786  | 48.15 | 594529  | 0.90036 |
| DAGVLGLSSAAMER           | up        | Upheld, isoform O                                                   | 696.843 | 2 | 30.26 | 1579477 | 30.2  | 1875543 | 1.54254 |
| IKPLAIEGFGEAK            | up        | Upheld, isoform O                                                   | 458.266 | 3 | 33.5  | 4523125 | 33.37 | 3961091 | 1.13762 |
| ISLSFR                   | up        | Upheld, isoform O                                                   | 361.713 | 2 | 30.22 | 1860854 | 30.16 | 1791066 | 1.25032 |
| IAAEVAAPLAK              | Flo2      | Flotillin 2, isoform I                                              | 527.319 | 2 | 25.68 | 101116  | 25.6  | 592504  | 7.61191 |
| AASPASSVSSLSR            | Gug       | Grunge, isoform J (EC 3.5.1.98)                                     | 610.317 | 2 | 19.87 | 670193  | 19.91 | 1047675 | 2.03072 |
| ALQALVK                  | Gug       | Grunge, isoform J (EC 3.5.1.98)                                     | 371.745 | 2 | 22.24 | 1429410 | 22.24 | 802676  | 0.72947 |
| ASPSVQISSSGGGPSGPGSVGPGC | Gug       | Grunge, isoform J (EC 3.5.1.98)                                     | 862.663 | 4 | 27.81 | 128265  | 27.69 | 91817   | 0.9299  |
| MYAPQPGQR                | Gug       | Grunge, isoform J (EC 3.5.1.98)                                     | 532.253 | 2 | 11.22 | 597570  | 11.23 | 396368  | 0.86165 |
| QHQAIAAAQQAQHK           | Gug       | Grunge, isoform J (EC 3.5.1.98)                                     | 477.58  | 3 | 7.39  | 102108  | 7.46  | 61942   | 0.78804 |
| QSLHDQYFR                | Gug       | Grunge, isoform J (EC 3.5.1.98)                                     | 398.528 | 3 | 18.86 | 599467  | 18.89 | 746793  | 1.61829 |
| SQSAIFVR                 | Gug       | Grunge, isoform J (EC 3.5.1.98)                                     | 454.253 | 2 | 22.57 | 2827859 | 22.59 | 2397174 | 1.10119 |
| WSPGVVADGDLLMFLR         | Gug       | Grunge, isoform J (EC 3.5.1.98)                                     | 888.461 | 2 | 59.21 | 701351  | 58.95 | 433086  | 0.80216 |
| WSPGVVADGDLLMFLR         | Gug       | Grunge, isoform J (EC 3.5.1.98)                                     | 896.459 | 2 | 56.45 | 1934292 | 56.29 | 935150  | 0.62803 |
| YGDPLAAK                 | Gug       | Grunge, isoform J (EC 3.5.1.98)                                     | 417.721 | 2 | 19.02 | 1065996 | 19    | 938830  | 1.14407 |
| AELDDNEDVGPR             | CG32352   | Uncharacterized protein, isoform L                                  | 665.299 | 2 | 17.49 | 854844  | 17.49 | 358372  | 0.54459 |
| AGTNDTDPVIEVEPAGVR       | CG32352   | Uncharacterized protein, isoform L                                  | 920.458 | 2 | 31.26 | 799045  | 31.12 | 994850  | 1.61737 |
| ELTPFEQELQR              | CG32352   | Uncharacterized protein, isoform L                                  | 695.354 | 2 | 34.45 | 1822534 | 34.23 | 951564  | 0.67824 |
| EQRPSLLTTETQTSR          | CG32352   | Uncharacterized protein, isoform L                                  | 582.971 | 3 | 21    | 714722  | 20.97 | 708419  | 1.28758 |
| FATLPSIR                 | CG32352   | Uncharacterized protein, isoform L                                  | 452.766 | 2 | 32.1  | 2652917 | 31.93 | 2934962 | 1.43715 |
| FHDLQDAQSTASSGK          | CG32352   | Uncharacterized protein, isoform L                                  | 531.25  | 3 | 15.41 | 391086  | 15.36 | 283768  | 0.94257 |
| GADSLILDGHIK             | CG32352   | Uncharacterized protein, isoform L                                  | 413.563 | 3 | 29.68 | 1264479 | 29.53 | 1469523 | 1.50969 |
| GFMASAQDR                | CG32352   | Uncharacterized protein, isoform L                                  | 499.722 | 2 | 11.62 | 285875  | 11.75 | 165984  | 0.75424 |
| GISEDNIQLR               | CG32352   | Uncharacterized protein, isoform L                                  | 572.801 | 2 | 25.08 | 2302903 | 24.99 | 2379743 | 1.34238 |



|                          |           |                                                                             |         |   |       |          |       |          |         |
|--------------------------|-----------|-----------------------------------------------------------------------------|---------|---|-------|----------|-------|----------|---------|
| LAELEVER                 | CG32352   | Uncharacterized protein, isoform L                                          | 479.764 | 2 | 23.2  | 1227100  | 23.26 | 1368562  | 1.44879 |
| NYQPDFDSQEFQR            | CG32352   | Uncharacterized protein, isoform L                                          | 837.363 | 2 | 28.43 | 615106   | 28.34 | 745801   | 1.57505 |
| RPLGPDEQPEIVLLLR         | CG32352   | Uncharacterized protein, isoform L                                          | 615.691 | 3 | 45.58 | 1022269  | 45.43 | 642182   | 0.81605 |
| SNLQSGAVINK              | CG32352   | Uncharacterized protein, isoform L                                          | 565.812 | 2 | 16.44 | 787854   | 16.41 | 462469   | 0.76253 |
| STASEPTEAEVELK           | CG32352   | Uncharacterized protein, isoform L                                          | 745.865 | 2 | 22.94 | 667731   | 22.98 | 801337   | 1.55896 |
| SVEAAQEQQDEVGDGAR        | CG32352   | Uncharacterized protein, isoform L                                          | 802.363 | 2 | 15.1  | 653414   | 15.03 | 773644   | 1.53807 |
| SVSNTFLQPHEDVIVYR        | CG32352   | Uncharacterized protein, isoform L                                          | 668.678 | 3 | 35.81 | 2074033  | 35.7  | 1364163  | 0.85442 |
| TDYEIHTSQVDSALEELPLQPENR | CG32352   | Uncharacterized protein, isoform L                                          | 957.793 | 3 | 39.43 | 686104   | 39.2  | 452230   | 0.85623 |
| THEDAQSLPGNSANPSR        | CG32352   | Uncharacterized protein, isoform L                                          | 594.278 | 3 | 13.23 | 675781   | 13.53 | 14072906 | 27.052  |
| VTAVIPCFPYAR             | Prps      | Uncharacterized protein, isoform D (EC 2.7.6.1)                             | 697.368 | 2 | 40.66 | 474085   | 40.36 | 413943   | 1.13424 |
| VYAILTHGIFSGPAISR        | Prps      | Uncharacterized protein, isoform D (EC 2.7.6.1)                             | 601.337 | 3 | 42.95 | 672496   | 42.83 | 628268   | 1.21361 |
| GGGSGTDFYNQQR            | tral      | Trailer hitch, isoform F                                                    | 693.805 | 2 | 16.19 | 310314   | 16.14 | 351936   | 1.47328 |
| AIGAGGQSTQVR             | Sap130    | Sin3A-associated protein 130, isoform F                                     | 572.807 | 2 | 12.25 | 925618   | 12.32 | 536264   | 0.75261 |
| GPGAGGTALTATNLPTR        | Sap130    | Sin3A-associated protein 130, isoform F                                     | 828.439 | 2 | 27.36 | 569694   | 27.23 | 266622   | 0.60796 |
| IGDQPATGGAGGR            | Sap130    | Sin3A-associated protein 130, isoform F                                     | 578.789 | 2 | 10.2  | 451645   | 10.33 | 79684    | 0.22919 |
| IIQLQPATGTTQQIIGSGAR     | Sap130    | Sin3A-associated protein 130, isoform F                                     | 727.738 | 3 | 34.41 | 1767358  | 34.26 | 2314474  | 1.70118 |
| QLENVTATGR               | Sap130    | Sin3A-associated protein 130, isoform F                                     | 544.788 | 2 | 15.37 | 399235   | 15.31 | 452872   | 1.47356 |
| SDGGGGISAGTPILSGGTIK     | Sap130    | Sin3A-associated protein 130, isoform F                                     | 929.499 | 2 | 41.44 | 945778   | 41.22 | 943168   | 1.29545 |
| TQITAIIPAAPAR            | Sap130    | Sin3A-associated protein 130, isoform F                                     | 605.351 | 2 | 25.4  | 3213530  | 25.35 | 3375310  | 1.36444 |
| VQPSLTITQLNPIGK          | Sap130    | Sin3A-associated protein 130, isoform F                                     | 804.97  | 2 | 41.17 | 1625853  | 40.98 | 1635254  | 1.30655 |
| VTHGVASSAASVPATVGPVNSTR  | Sap130    | Sin3A-associated protein 130, isoform F                                     | 722.382 | 3 | 23.81 | 505024   | 23.8  | 708422   | 1.82223 |
| VTTGAGNPQQATASGALVSSFMR  | Sap130    | Sin3A-associated protein 130, isoform F                                     | 756.374 | 3 | 32.37 | 491161   | 32.25 | 670045   | 1.77216 |
| ADNSAPAAQDDGSGAPVVR      | Mi-2      | Mi-2, isoform D (EC 3.6.1.3)                                                | 899.422 | 2 | 16.91 | 470838   | 16.88 | 285548   | 0.78783 |
| AVAAATSAATGATGK          | Mi-2      | Mi-2, isoform D (EC 3.6.1.3)                                                | 624.333 | 2 | 13.11 | 1665996  | 13.11 | 983701   | 0.76703 |
| HHYEQHQEDVGR             | Mi-2      | Mi-2, isoform D (EC 3.6.1.3)                                                | 512.231 | 3 | 7.62  | 201593   | 7.78  | 286609   | 1.84687 |
| HHYEQHQEDVGR             | Mi-2      | Mi-2, isoform D (EC 3.6.1.3)                                                | 384.425 | 4 | 7.62  | 91019    | 7.78  | 138645   | 1.97877 |
| IDGGITGTLR               | Mi-2      | Mi-2, isoform D (EC 3.6.1.3)                                                | 501.783 | 2 | 24.03 | 1258518  | 24.04 | 897889   | 0.9268  |
| QAIDYYQDLR               | Mi-2      | Mi-2, isoform D (EC 3.6.1.3)                                                | 642.815 | 2 | 28.79 | 539792   | 28.68 | 906085   | 2.18054 |
| SVTGDEPEEPR              | Mi-2      | Mi-2, isoform D (EC 3.6.1.3)                                                | 608.278 | 2 | 13.23 | 438146   | 13.27 | 556388   | 1.64961 |
| VGGNIEVLGFNAR            | Mi-2      | Mi-2, isoform D (EC 3.6.1.3)                                                | 673.365 | 2 | 37.32 | 2342650  | 37.14 | 3356129  | 1.86103 |
| GAFGKQGTVAR              | Rpl10     | Ribosomal protein L10, isoform E                                            | 396.888 | 3 | 13.7  | 378695   | 13.67 | 452705   | 1.55292 |
| IFDLGR                   | Rpl10     | Ribosomal protein L10, isoform E                                            | 360.706 | 2 | 28.76 | 454688   | 28.68 | 577700   | 1.65048 |
| AQELWELIVK               | up        | Upheld, isoform Q (Upheld, isoform R) (Upheld, isoform S)                   | 614.85  | 2 | 48.34 | 857786   | 48.15 | 594529   | 0.90036 |
| DAGVLGLSSAAMER           | up        | Upheld, isoform Q (Upheld, isoform R) (Upheld, isoform S)                   | 696.843 | 2 | 30.26 | 1579477  | 30.2  | 1875543  | 1.54254 |
| IKPLAIEGFGEAK            | up        | Upheld, isoform Q (Upheld, isoform R) (Upheld, isoform S)                   | 458.266 | 3 | 33.5  | 4523125  | 33.37 | 3961091  | 1.13762 |
| ISLSFR                   | up        | Upheld, isoform Q (Upheld, isoform R) (Upheld, isoform S)                   | 361.713 | 2 | 30.22 | 1860854  | 30.16 | 1791066  | 1.25032 |
| IAAEVAAPLAK              | Flo2      | Flotillin 2, isoform L                                                      | 527.319 | 2 | 25.68 | 101116   | 25.6  | 592504   | 7.61191 |
| GAAQNIIPASTGAAK          | Gapdh2    | Glyceraldehyde-3-phosphate dehydrogenase (EC 1.2.1.12)                      | 685.375 | 2 | 22.79 | 1294864  | 22.83 | 1032530  | 1.03586 |
| VINDNFEIVEGLMTTVHATTATQK | Gapdh2    | Glyceraldehyde-3-phosphate dehydrogenase (EC 1.2.1.12)                      | 883.446 | 3 | 44.43 | 15660984 | 44.21 | 14722617 | 1.2212  |
| VPTPNVSVVLDLTVR          | Gapdh2    | Glyceraldehyde-3-phosphate dehydrogenase (EC 1.2.1.12)                      | 748.428 | 2 | 39.69 | 2420706  | 39.45 | 1346589  | 0.72263 |
| VYSPHVLNLTLDLPLGLTK      | shi       | Shibire, isoform O                                                          | 698.405 | 3 | 53.41 | 463587   | 53.25 | 477207   | 1.3372  |
| AAEFNFR                  | wupA      | Wings up A, isoform K (Wings up A, isoform L) (Wings up A, isoform M)       | 427.711 | 2 | 24.96 | 9042040  | 24.95 | 9905750  | 1.42313 |
| GFMTPER                  | wupA      | Wings up A, isoform K (Wings up A, isoform L) (Wings up A, isoform M)       | 419.2   | 2 | 19.67 | 1284815  | 19.67 | 1246317  | 1.26012 |
| NLSDASEDTLK              | wupA      | Wings up A, isoform K (Wings up A, isoform L) (Wings up A, isoform M)       | 596.788 | 2 | 18.67 | 925293   | 18.66 | 786155   | 1.1037  |
| ALLVWSPTK                | CoRest    | CoRest, isoform K                                                           | 507.803 | 2 | 37.31 | 2318735  | 37.1  | 1637547  | 0.91741 |
| SIASLVK                  | CoRest    | CoRest, isoform K                                                           | 359.229 | 2 | 23.99 | 840931   | 23.99 | 310644   | 0.47987 |
| VLFEQAFQFHGK             | CoRest    | CoRest, isoform K                                                           | 484.254 | 3 | 38.03 | 957244   | 37.88 | 274801   | 0.37292 |
| SPVTNIAR                 | AP-2mu    | Adaptor protein complex 2, mu subunit, isoform A (Adaptor protein complex 2 | 429.246 | 2 | 16.3  | 972986   | 16.1  | 1029269  | 1.37418 |
| TFITQQGIK                | AP-2mu    | Adaptor protein complex 2, mu subunit, isoform A (Adaptor protein complex 2 | 518.295 | 2 | 24.31 | 387861   | 24.28 | 824058   | 2.75997 |
| GIVPQFVTFLR              | Kap-alpha | Importin subunit alpha                                                      | 638.874 | 2 | 53.91 | 871      | 51.78 | 836549   | 1247.66 |
| FQSLGVAFYR               | Rab7      | CG5915 protein (CG5915-PA) (GH03685p) (MIP21169p) (Rab7 protein) (Rab       | 594.314 | 2 | 37.76 | 127091   | 37.64 | 128722   | 1.31571 |
| AAPLVAAGPAIVK            | Ccp84Ag   | Ccp84Ag (Cuticle protein)                                                   | 589.369 | 2 | 31.83 | 1401640  | 31.7  | 1299475  | 1.20435 |
| AAVAAPVVR                | Ccp84Ag   | Ccp84Ag (Cuticle protein)                                                   | 427.266 | 2 | 18.94 | 2185353  | 18.93 | 1045509  | 0.62148 |

|                            |           |                                                                                  |         |   |       |          |       |           |         |
|----------------------------|-----------|----------------------------------------------------------------------------------|---------|---|-------|----------|-------|-----------|---------|
| LMNAYCDR                   | smt3      | Small ubiquitin-related modifier (SUMO)                                          | 521.726 | 2 | 16.48 | 162687   | 16.48 | 576360    | 4.60218 |
| VLGQDNAVQFK                | smt3      | Small ubiquitin-related modifier (SUMO)                                          | 659.362 | 2 | 30.18 | 2032621  | 29.97 | 8993196   | 5.74751 |
| IGLIPLISDDVVER             | RplI33    | GH07456p (RNA polymerase II 33kD subunit) (EC 2.7.7.6) (RNA polymerase           | 769.943 | 2 | 51.98 | 343136   | 51.54 | 499279    | 1.89016 |
| VTVAEEGAR                  | Mppc2     | MIP08013p1 (Mitochondrial phosphate carrier protein 2, isoform A) (Mitochon      | 466.246 | 2 | 11.65 | 204818   | 11.71 | 82620     | 0.52401 |
| ANAVAAPFR                  | simj      | Simjang, isoform A (Simjang, isoform B)                                          | 458.754 | 2 | 21.85 | 720615   | 21.82 | 738030    | 1.33043 |
| GSLSVTPTSAVPLPAHSK         | simj      | Simjang, isoform A (Simjang, isoform B)                                          | 583.656 | 3 | 30.14 | 968499   | 29.97 | 1592607   | 2.13615 |
| SSLPAGATLAAGTTTIPATSSSHR   | simj      | Simjang, isoform A (Simjang, isoform B)                                          | 752.392 | 3 | 30.52 | 3143778  | 30.4  | 4148506   | 1.7142  |
| SSLSGSGGPAVSISATNSR        | simj      | Simjang, isoform A (Simjang, isoform B)                                          | 867.934 | 2 | 24.08 | 1895042  | 24.04 | 2008027   | 1.37649 |
| TNLNLTITPSVTITPTSAPSSSLKPF | simj      | Simjang, isoform A (Simjang, isoform B)                                          | 935.19  | 3 | 42.52 | 2161882  | 42.25 | 1939128   | 1.16519 |
| GATALGPATTSGASER           | PIP5K59E  | Phosphatidylinositol 4-phosphate 5-kinase at 59B, isoform I (EC 2.7.1.-) (EC 2   | 723.863 | 2 | 16.98 | 232423   | 17.03 | 258407    | 1.44427 |
| EYTAIEAK                   | Phb2      | Prohibitin                                                                       | 498.256 | 2 | 17.18 | 20133    | 17.23 | 257332    | 16.6038 |
| IVQAEGEAEAAK               | Phb2      | Prohibitin                                                                       | 608.314 | 2 | 13.11 | 424400   | 13.11 | 493702    | 1.51116 |
| LGGIQSDIYSEGLHVR           | Phb2      | Prohibitin                                                                       | 581.972 | 3 | 33.76 | 567085   | 33.65 | 472144    | 1.08156 |
| NFPALTYFR                  | I(2)01289 | Lethal (2) 01289, isoform K                                                      | 564.795 | 2 | 42.88 | 433584   | 42.79 | 472450    | 1.41548 |
| NFPALTYFR                  | I(2)01289 | Lethal (2) 01289, isoform H                                                      | 564.795 | 2 | 42.88 | 433584   | 42.79 | 472450    | 1.41548 |
| AGLQFPVGR                  | His2A:CG  | Histone H2A                                                                      | 472.769 | 2 | 31.56 | 98633592 | 31.42 | 106838928 | 1.40711 |
| HLQLAIR                    | His2A:CG  | Histone H2A                                                                      | 425.767 | 2 | 22.72 | 21451580 | 22.66 | 9817742   | 0.59453 |
| LLSGVTIAQGGVLPNIQAVLLPK    | His2A:CG  | Histone H2A                                                                      | 1151.2  | 2 | 58.27 | 5972554  | 58.05 | 3630529   | 0.78965 |
| LLSGVTIAQGGVLPNIQAVLLPK    | His2A:CG  | Histone H2A                                                                      | 767.802 | 3 | 58.3  | 10409686 | 58.05 | 8036129   | 1.00284 |
| VGAGAPVYLAAVMEYLA AEVLELAC | His2A:CG  | Histone H2A                                                                      | 963.844 | 3 | 65.83 | 2552861  | 65.87 | 479648    | 0.24407 |
| VGAGAPVYLAAVMEYLA AEVLELAC | His2A:CG  | Histone H2A                                                                      | 723.135 | 4 | 65.83 | 1259116  | 65.83 | 400141    | 0.41283 |
| VGAGAPVYLAAVMEYLA AEVLELAC | His2A:CG  | Histone H2A                                                                      | 969.176 | 3 | 65.67 | 521759   | 65.67 | 545456    | 1.35804 |
| ILIQGNVSGSDESSAER          | mIF3      | IP07950p (Mitochondrial translation initiation factor 3, isoform A) (Mitochondri | 867.419 | 2 | 19.52 | 3032484  | 19.49 | 1576337   | 0.67526 |
| ITEHDLSSR                  | mIF3      | IP07950p (Mitochondrial translation initiation factor 3, isoform A) (Mitochondri | 353.181 | 3 | 12.46 | 486310   | 12.51 | 535959    | 1.43166 |
| ITLIQQNQSISITLLEEAKQ       | mIF3      | IP07950p (Mitochondrial translation initiation factor 3, isoform A) (Mitochondri | 753.413 | 3 | 42.15 | 498258   | 41.91 | 390505    | 1.01811 |
| HAEIASSFIR                 | UQCR-6.   | GEO11443p1 (RH56961p) (Ubiquinol-cytochrome c reductase 6.4 kDa subun            | 565.801 | 2 | 24.81 | 2498313  | 24.75 | 1394569   | 0.72513 |
| LVLQYVPIYGSK               | UQCR-6.   | GEO11443p1 (RH56961p) (Ubiquinol-cytochrome c reductase 6.4 kDa subun            | 690.4   | 2 | 41.72 | 1373954  | 41.56 | 271010    | 0.25623 |
| IQVNPNEIHKPTTTR            | DnaJ-1    | DNAJ-1 (DnaJ-like-1, isoform B)                                                  | 621.015 | 3 | 20.92 | 19679    | 20.89 | 261697    | 17.275  |
| DSSLSSGALANILAIFK          | Hn        | Henna, isoform B (EC 1.14.16.1)                                                  | 853.97  | 2 | 65.24 | 302707   | 65.18 | 21367     | 0.09169 |
| FANSIPRPFVGR               | Hn        | Henna, isoform B (EC 1.14.16.1)                                                  | 454.254 | 3 | 31.64 | 779696   | 31.6  | 818437    | 1.36359 |
| ADNSAPAAQDDGSGAPVVR        | Mi-2      | Mi-2, isoform B (EC 3.6.1.3)                                                     | 899.422 | 2 | 16.91 | 470838   | 16.88 | 285548    | 0.78783 |
| AVAAATSAATGATGK            | Mi-2      | Mi-2, isoform B (EC 3.6.1.3)                                                     | 624.333 | 2 | 13.11 | 1665996  | 13.11 | 983701    | 0.76703 |
| HHYEQHQEDVGR               | Mi-2      | Mi-2, isoform B (EC 3.6.1.3)                                                     | 512.231 | 3 | 7.62  | 201593   | 7.78  | 286609    | 1.84687 |
| HHYEQHQEDVGR               | Mi-2      | Mi-2, isoform B (EC 3.6.1.3)                                                     | 384.425 | 4 | 7.62  | 91019    | 7.78  | 138645    | 1.97877 |
| IDGGITGLR                  | Mi-2      | Mi-2, isoform B (EC 3.6.1.3)                                                     | 501.783 | 2 | 24.03 | 1258518  | 24.04 | 897889    | 0.9268  |
| QAIDYYQDLR                 | Mi-2      | Mi-2, isoform B (EC 3.6.1.3)                                                     | 642.815 | 2 | 28.79 | 539792   | 28.68 | 906085    | 2.18054 |
| SVTGDEPEEPR                | Mi-2      | Mi-2, isoform B (EC 3.6.1.3)                                                     | 608.278 | 2 | 13.23 | 438146   | 13.27 | 556388    | 1.64961 |
| VGGNIEVLGFNAR              | Mi-2      | Mi-2, isoform B (EC 3.6.1.3)                                                     | 673.365 | 2 | 37.32 | 2342650  | 37.14 | 3356129   | 1.86103 |
| AGTNDTDPVIEVEPAGVR         | CG17926   | GH14495p                                                                         | 920.458 | 2 | 31.26 | 799045   | 31.12 | 994850    | 1.61737 |
| ELTPFEQELQR                | CG17926   | GH14495p                                                                         | 695.354 | 2 | 34.45 | 1822534  | 34.23 | 951564    | 0.67824 |
| RPLGPDEQPEIVLLLR           | CG17926   | GH14495p                                                                         | 615.691 | 3 | 45.58 | 1022269  | 45.43 | 642182    | 0.81605 |
| THEDAQSLPGNSANPSR          | CG17926   | GH14495p                                                                         | 594.278 | 3 | 13.23 | 675781   | 13.53 | 14072906  | 27.052  |
| AALDCVELFATEQR             | Sin3A     | LD13852p (Sin3A, isoform B) (Sin3A, isoform C) (Sin3A, isoform E)                | 811.896 | 2 | 40.25 | 1722570  | 40.03 | 1260136   | 0.9503  |
| AALDCVELFATEQR             | Sin3A     | LD13852p (Sin3A, isoform B) (Sin3A, isoform C) (Sin3A, isoform E)                | 541.6   | 3 | 40.21 | 619337   | 39.99 | 590227    | 1.23798 |
| ANTADGANTVQIHVTGGGAANNPA   | Sin3A     | LD13852p (Sin3A, isoform B) (Sin3A, isoform C) (Sin3A, isoform E)                | 928.703 | 4 | 26.74 | 509613   | 26.67 | 542107    | 1.38187 |
| DVSFSEASSK                 | Sin3A     | LD13852p (Sin3A, isoform B) (Sin3A, isoform C) (Sin3A, isoform E)                | 528.746 | 2 | 17.44 | 1467180  | 17.41 | 381916    | 0.33815 |
| DYHAGLQQQAQHR              | Sin3A     | LD13852p (Sin3A, isoform B) (Sin3A, isoform C) (Sin3A, isoform E)                | 517.919 | 3 | 11.22 | 2585659  | 11.33 | 2959684   | 1.48695 |
| DYHAGLQQQAQHR              | Sin3A     | LD13852p (Sin3A, isoform B) (Sin3A, isoform C) (Sin3A, isoform E)                | 388.691 | 4 | 11.22 | 864204   | 11.33 | 948677    | 1.42602 |
| ESTATALR                   | Sin3A     | LD13852p (Sin3A, isoform B) (Sin3A, isoform C) (Sin3A, isoform E)                | 424.727 | 2 | 11.65 | 1476544  | 11.71 | 969884    | 0.85329 |
| FHLDDHLGGTSQTIHQR          | Sin3A     | LD13852p (Sin3A, isoform B) (Sin3A, isoform C) (Sin3A, isoform E)                | 654.657 | 3 | 23.08 | 1395287  | 23.06 | 756858    | 0.70465 |
| FHLDDHLGGTSQTIHQR          | Sin3A     | LD13852p (Sin3A, isoform B) (Sin3A, isoform C) (Sin3A, isoform E)                | 491.245 | 4 | 23.12 | 3523823  | 23.06 | 1769329   | 0.65225 |
| FLEILHDYQR                 | Sin3A     | LD13852p (Sin3A, isoform B) (Sin3A, isoform C) (Sin3A, isoform E)                | 445.235 | 3 | 35.73 | 2969216  | 35.43 | 0         | 0       |
| GTSHQSAAEVYQDVDLSSCK       | Sin3A     | LD13852p (Sin3A, isoform B) (Sin3A, isoform C) (Sin3A, isoform E)                | 727.995 | 3 | 27.24 | 493988   | 27.08 | 189593    | 0.49857 |

|                            |       |                                                                               |         |   |       |          |       |          |         |
|----------------------------|-------|-------------------------------------------------------------------------------|---------|---|-------|----------|-------|----------|---------|
| ILTPQHGGAQTIAYLPSTTPTATNLK | Sin3A | LD13852p (Sin3A, isoform B) (Sin3A, isoform C) (Sin3A, isoform E)             | 898.82  | 3 | 35.8  | 4998395  | 35.62 | 5283785  | 1.37321 |
| LANPALGGGGNTGR             | Sin3A | LD13852p (Sin3A, isoform B) (Sin3A, isoform C) (Sin3A, isoform E)             | 627.831 | 2 | 17.75 | 10453019 | 17.75 | 7732981  | 0.96101 |
| LGASYCALPQSTVPK            | Sin3A | LD13852p (Sin3A, isoform B) (Sin3A, isoform C) (Sin3A, isoform E)             | 796.411 | 2 | 28.68 | 1479395  | 28.59 | 1263101  | 1.10911 |
| LHAILCQR                   | Sin3A | LD13852p (Sin3A, isoform B) (Sin3A, isoform C) (Sin3A, isoform E)             | 499.266 | 2 | 19.41 | 1985761  | 19.38 | 633888   | 0.41468 |
| LLEEQR                     | Sin3A | LD13852p (Sin3A, isoform B) (Sin3A, isoform C) (Sin3A, isoform E)             | 443.753 | 2 | 17.75 | 2718818  | 17.76 | 2609800  | 1.24695 |
| MLTEQEVYTVQVAK             | Sin3A | LD13852p (Sin3A, isoform B) (Sin3A, isoform C) (Sin3A, isoform E)             | 778.387 | 2 | 27.81 | 3209047  | 27.77 | 3556038  | 1.4395  |
| NDILFEK                    | Sin3A | LD13852p (Sin3A, isoform B) (Sin3A, isoform C) (Sin3A, isoform E)             | 439.735 | 2 | 27.05 | 2341755  | 27.01 | 1764770  | 0.97897 |
| NPFVAVPIVLK                | Sin3A | LD13852p (Sin3A, isoform B) (Sin3A, isoform C) (Sin3A, isoform E)             | 598.874 | 2 | 46.1  | 1222769  | 45.94 | 767794   | 0.81569 |
| QFVPDLFFAPR                | Sin3A | LD13852p (Sin3A, isoform B) (Sin3A, isoform C) (Sin3A, isoform E)             | 668.856 | 2 | 50.52 | 6756025  | 50.25 | 7385320  | 1.42004 |
| SAHAAAIGNLSAVNTSVSIK       | Sin3A | LD13852p (Sin3A, isoform B) (Sin3A, isoform C) (Sin3A, isoform E)             | 956.018 | 2 | 31.61 | 170248   | 31.53 | 254171   | 1.9394  |
| SAHAAAIGNLSAVNTSVSIK       | Sin3A | LD13852p (Sin3A, isoform B) (Sin3A, isoform C) (Sin3A, isoform E)             | 637.681 | 3 | 31.61 | 2399426  | 31.53 | 2575551  | 1.39439 |
| SHCIDTPGVIER               | Sin3A | LD13852p (Sin3A, isoform B) (Sin3A, isoform C) (Sin3A, isoform E)             | 692.338 | 2 | 20.25 | 307279   | 20.24 | 237394   | 1.0036  |
| SHCIDTPGVIER               | Sin3A | LD13852p (Sin3A, isoform B) (Sin3A, isoform C) (Sin3A, isoform E)             | 461.894 | 3 | 20.22 | 598355   | 20.24 | 340785   | 0.73985 |
| SSPGISYATPPLPSGPHGQHNSGS   | Sin3A | LD13852p (Sin3A, isoform B) (Sin3A, isoform C) (Sin3A, isoform E)             | 887.432 | 3 | 25.86 | 488181   | 25.83 | 202251   | 0.53819 |
| TADQINASWGWSASK            | Sin3A | LD13852p (Sin3A, isoform B) (Sin3A, isoform C) (Sin3A, isoform E)             | 746.855 | 2 | 22.49 | 436619   | 22.54 | 444931   | 1.23277 |
| TILDDAANLIIHVK             | Sin3A | LD13852p (Sin3A, isoform B) (Sin3A, isoform C) (Sin3A, isoform E)             | 418.99  | 4 | 49.12 | 1380604  | 49.31 | 716808   | 0.67446 |
| TISGTQTVATAVGNLATISQQQPQVQ | Sin3A | LD13852p (Sin3A, isoform B) (Sin3A, isoform C) (Sin3A, isoform E)             | 1041.89 | 3 | 45.65 | 3056186  | 45.35 | 3369934  | 1.4324  |
| TYNNNQQQQNHVIGSGLNATR      | Sin3A | LD13852p (Sin3A, isoform B) (Sin3A, isoform C) (Sin3A, isoform E)             | 786.383 | 3 | 19.45 | 600429   | 19.45 | 504776   | 1.09209 |
| VLENLQK                    | Sin3A | LD13852p (Sin3A, isoform B) (Sin3A, isoform C) (Sin3A, isoform E)             | 422.25  | 2 | 16.41 | 3516505  | 16.41 | 2648950  | 0.97855 |
| VTIELLDSEPEEVDKPAALK       | Sin3A | LD13852p (Sin3A, isoform B) (Sin3A, isoform C) (Sin3A, isoform E)             | 732.726 | 3 | 39.02 | 4118678  | 38.81 | 3130918  | 0.9875  |
| YAHFQTYVVK                 | Sin3A | LD13852p (Sin3A, isoform B) (Sin3A, isoform C) (Sin3A, isoform E)             | 635.814 | 2 | 19.83 | 763160   | 19.77 | 541027   | 0.92093 |
| YAHFQTYVVK                 | Sin3A | LD13852p (Sin3A, isoform B) (Sin3A, isoform C) (Sin3A, isoform E)             | 424.212 | 3 | 19.83 | 1837847  | 19.81 | 1859402  | 1.31428 |
| YVGHAPNQNLTHGNAK           | Sin3A | LD13852p (Sin3A, isoform B) (Sin3A, isoform C) (Sin3A, isoform E)             | 619.975 | 3 | 10.09 | 210214   | 10.13 | 163530   | 1.01055 |
| LSEASQAADER                | Tm1   | RE21974p (Tropomyosin 1, isoform N)                                           | 696.816 | 2 | 11.57 | 343010   | 11.67 | 695696   | 2.63472 |
| AGSEPYVPPPSYWNR            | Mf    | Mf4 protein (Myofilin, isoform L) (Myofilin, isoform M)                       | 860.41  | 2 | 33.23 | 748487   | 33.06 | 1566838  | 2.71933 |
| AIYDHHYSR                  | Mf    | Mf4 protein (Myofilin, isoform L) (Myofilin, isoform M)                       | 581.275 | 2 | 11.31 | 475566   | 11.41 | 651391   | 1.77932 |
| AIYDHHYSR                  | Mf    | Mf4 protein (Myofilin, isoform L) (Myofilin, isoform M)                       | 387.853 | 3 | 11.31 | 2895978  | 11.41 | 4746762  | 2.12924 |
| ASRPYSSYLDSPSYR            | Mf    | Mf4 protein (Myofilin, isoform L) (Myofilin, isoform M)                       | 874.916 | 2 | 25.08 | 1194562  | 25.03 | 1397150  | 1.51935 |
| ASRPYSSYLDSPSYR            | Mf    | Mf4 protein (Myofilin, isoform L) (Myofilin, isoform M)                       | 583.613 | 3 | 25.12 | 5487893  | 25.03 | 8501748  | 2.01245 |
| ASSLEPLDELFER              | Mf    | Mf4 protein (Myofilin, isoform L) (Myofilin, isoform M)                       | 753.378 | 2 | 48.45 | 4498040  | 48.19 | 5102070  | 1.47348 |
| DKPLTPNSLVPLEYEPEDK        | Mf    | Mf4 protein (Myofilin, isoform L) (Myofilin, isoform M)                       | 728.707 | 3 | 38.98 | 567161   | 38.81 | 728559   | 1.66871 |
| DSYLSQVK                   | Mf    | Mf4 protein (Myofilin, isoform L) (Myofilin, isoform M)                       | 454.74  | 2 | 22.04 | 1523720  | 22.02 | 1430945  | 1.21994 |
| DTYGYSPR                   | Mf    | Mf4 protein (Myofilin, isoform L) (Myofilin, isoform M)                       | 479.717 | 2 | 14.86 | 2640775  | 14.83 | 2840777  | 1.39742 |
| FWQSYIR                    | Mf    | Mf4 protein (Myofilin, isoform L) (Myofilin, isoform M)                       | 500.256 | 2 | 32.37 | 739255   | 32.25 | 1687659  | 2.9656  |
| GGPSVFDNR                  | Mf    | Mf4 protein (Myofilin, isoform L) (Myofilin, isoform M)                       | 417.709 | 2 | 19.86 | 5727839  | 19.85 | 7157511  | 1.62328 |
| LLAELNK                    | Mf    | Mf4 protein (Myofilin, isoform L) (Myofilin, isoform M)                       | 400.747 | 2 | 22.38 | 846200   | 22.35 | 1253332  | 1.92405 |
| NHLEMIGR                   | Mf    | Mf4 protein (Myofilin, isoform L) (Myofilin, isoform M)                       | 493.248 | 2 | 12.87 | 1554021  | 12.91 | 1080925  | 0.90357 |
| SASPFRRPAR                 | Mf    | Mf4 protein (Myofilin, isoform L) (Myofilin, isoform M)                       | 494.77  | 2 | 13.46 | 1272464  | 13.42 | 1443660  | 1.47381 |
| SIYDEPATANER               | Mf    | Mf4 protein (Myofilin, isoform L) (Myofilin, isoform M)                       | 683.318 | 2 | 18.42 | 9216683  | 18.42 | 1504678  | 2.12072 |
| WGPRPTEVAYDAEGLPIFHPR      | Mf    | Mf4 protein (Myofilin, isoform L) (Myofilin, isoform M)                       | 602.809 | 4 | 43.06 | 371242   | 42.9  | 651591   | 2.28003 |
| YGLYLR                     | Mf    | Mf4 protein (Myofilin, isoform L) (Myofilin, isoform M)                       | 392.721 | 2 | 28.26 | 5499678  | 28.16 | 8903475  | 2.10303 |
| LGGVPVGVIAVETR             | ACC   | Acetyl-CoA carboxylase, isoform B (Acetyl-CoA carboxylase, isoform C) (EC 6)  | 683.906 | 2 | 38.38 | 348778   | 38.27 | 503425   | 1.87503 |
| DFPGPYCAR                  | Swim  | RE01730p (Secreted Wg-interacting molecule, isoform A) (Secreted Wg-interacti | 541.74  | 2 | 24.28 | 1817528  | 24.24 | 1758109  | 1.25657 |
| QQGCEGGHLDAWR              | Swim  | RE01730p (Secreted Wg-interacting molecule, isoform A) (Secreted Wg-interacti | 528.904 | 3 | 20.29 | 345703   | 20.31 | 382594   | 1.43766 |
| GISQEFAEK                  | P32   | CG6459 protein (CG6459-PA) (LD29590p) (P32)                                   | 504.753 | 2 | 20.03 | 420230   | 20.01 | 235393   | 0.72766 |
| LTGADVELTK                 | P32   | CG6459 protein (CG6459-PA) (LD29590p) (P32)                                   | 523.79  | 2 | 22.57 | 348888   | 22.55 | 452549   | 1.68501 |
| ESTLHLVLR                  | RpL40 | RE10554p (Ribosomal protein L40, isoform B)                                   | 534.314 | 2 | 29.06 | 19834334 | 28.96 | 12823394 | 0.83986 |
| ESTLHLVLR                  | RpL40 | RE10554p (Ribosomal protein L40, isoform B)                                   | 356.545 | 3 | 29.02 | 13873703 | 28.96 | 8349692  | 0.78181 |
| MQIFVK                     | RpL40 | RE10554p (Ribosomal protein L40, isoform B)                                   | 383.22  | 2 | 27.43 | 8697430  | 27.39 | 10348569 | 1.54565 |
| TITLEVEPSDTIENVK           | RpL40 | RE10554p (Ribosomal protein L40, isoform B)                                   | 894.467 | 2 | 36.85 | 41743372 | 36.64 | 47966256 | 1.49269 |
| TITLEVEPSDTIENVK           | RpL40 | RE10554p (Ribosomal protein L40, isoform B)                                   | 596.647 | 3 | 36.85 | 1563861  | 36.68 | 1963090  | 1.63066 |
| TLSDYNIQK                  | RpL40 | RE10554p (Ribosomal protein L40, isoform B)                                   | 541.28  | 2 | 19.53 | 19914654 | 19.52 | 7860957  | 0.51277 |
| GVDDLQQLDMPNNQLVELMHRSR    | RpS15 | GEO07301p1 (RE08270p) (Ribosomal protein S15, isoform A)                      | 846.421 | 3 | 56.93 | 2438393  | 56.76 | 3030472  | 1.61447 |

|                                 |         |                                                                                                 |         |   |       |         |       |         |         |
|---------------------------------|---------|-------------------------------------------------------------------------------------------------|---------|---|-------|---------|-------|---------|---------|
| GVLDLQQLDMPNNQLVELMHSR          | RpS15   | GEO07301p1 (RE08270p) (Ribosomal protein S15, isoform A)                                        | 851.753 | 3 | 52.82 | 1993202 | 52.51 | 2732090 | 1.7806  |
| GVLDLQQLDMPNNQLVELMHSR          | RpS15   | GEO07301p1 (RE08270p) (Ribosomal protein S15, isoform A)                                        | 857.084 | 3 | 46.75 | 939137  | 46.49 | 1012387 | 1.40036 |
| HGRPGIGATHSSR                   | RpS15   | GEO07301p1 (RE08270p) (Ribosomal protein S15, isoform A)                                        | 666.848 | 2 | 7.93  | 677685  | 8.06  | 679248  | 1.30204 |
| HGRPGIGATHSSR                   | RpS15   | GEO07301p1 (RE08270p) (Ribosomal protein S15, isoform A)                                        | 444.901 | 3 | 7.93  | 4672602 | 8.06  | 5517679 | 1.53398 |
| GGCQVIADTGTSLIAAPLEEATSINC      | catHD   | CathD, isoform A (EC 3.4.23.-) (CathD, isoform B) (CathD, isoform C) (Cather                    | 915.464 | 3 | 49.08 | 208849  | 48.86 | 305991  | 1.90326 |
| AFSVALESIPLALAENSGLHPHETLSICCT5 | CCT5    | Chaperonin containing TCP1 subunit 5, isoform A (GM12270p)                                      | 1017.22 | 3 | 62.61 | 384652  | 62.45 | 401044  | 1.3544  |
| FEELTPEK                        | CCT5    | Chaperonin containing TCP1 subunit 5, isoform A (GM12270p)                                      | 496.75  | 2 | 20.66 | 516313  | 20.64 | 311483  | 0.78369 |
| IADGFELAAQCAIK                  | CCT5    | Chaperonin containing TCP1 subunit 5, isoform A (GM12270p)                                      | 753.885 | 2 | 37.31 | 382322  | 37.14 | 458415  | 1.55759 |
| LGVAGLVR                        | CCT5    | Chaperonin containing TCP1 subunit 5, isoform A (GM12270p)                                      | 392.756 | 2 | 29.1  | 644815  | 29.01 | 620261  | 1.24957 |
| VAIIDLQDNLEEFVK                 | Pdh     | Photoreceptor dehydrogenase, isoform C (EC 1.1.1.1) (EC 1.1.1.105) (Pigmei                      | 873.47  | 2 | 52.44 | 438704  | 52.21 | 466578  | 1.38158 |
| GYAFVFTFNR                      | Syp     | Syncrip, isoform B (Syncrip, isoform L)                                                         | 588.296 | 2 | 35.44 | 514118  | 35.33 | 604713  | 1.52795 |
| VSVNDFIK                        | muc     | Midline uncoordinated, isoform A (EC 2.3.1.12)                                                  | 517.798 | 2 | 38.03 | 442234  | 37.88 | 706401  | 2.07502 |
| VVDGAVAAR                       | muc     | Midline uncoordinated, isoform A (EC 2.3.1.12)                                                  | 429.246 | 2 | 12.17 | 236652  | 12.23 | 154993  | 0.85079 |
| YEDIPVTNMR                      | muc     | Midline uncoordinated, isoform A (EC 2.3.1.12)                                                  | 627.295 | 2 | 20.92 | 490136  | 20.93 | 697704  | 1.84917 |
| AASPASSVSSLSR                   | Gug     | Grunge, isoform D (EC 3.5.1.98) (Grunge, isoform E)                                             | 610.317 | 2 | 19.87 | 670193  | 19.91 | 1047675 | 2.03072 |
| ALQALVK                         | Gug     | Grunge, isoform D (EC 3.5.1.98) (Grunge, isoform E)                                             | 371.745 | 2 | 22.24 | 1429410 | 22.24 | 802676  | 0.72947 |
| ASPSVQISSSGGGPSGPGSVGPGC        | Gug     | Grunge, isoform D (EC 3.5.1.98) (Grunge, isoform E)                                             | 862.663 | 4 | 27.81 | 128265  | 27.69 | 91817   | 0.9299  |
| MYAPQPGQR                       | Gug     | Grunge, isoform D (EC 3.5.1.98) (Grunge, isoform E)                                             | 532.253 | 2 | 11.22 | 597570  | 11.23 | 396368  | 0.86165 |
| QHQAASAAAAAQQHK                 | Gug     | Grunge, isoform D (EC 3.5.1.98) (Grunge, isoform E)                                             | 477.58  | 3 | 7.39  | 102108  | 7.46  | 61942   | 0.78804 |
| QSLHDQYFR                       | Gug     | Grunge, isoform D (EC 3.5.1.98) (Grunge, isoform E)                                             | 398.528 | 3 | 18.86 | 599467  | 18.89 | 746793  | 1.61829 |
| SQSAIFVR                        | Gug     | Grunge, isoform D (EC 3.5.1.98) (Grunge, isoform E)                                             | 454.253 | 2 | 22.57 | 2827859 | 22.59 | 2397174 | 1.10119 |
| WSPGVVADGDLLMFLR                | Gug     | Grunge, isoform D (EC 3.5.1.98) (Grunge, isoform E)                                             | 888.461 | 2 | 59.21 | 701351  | 58.95 | 433086  | 0.80216 |
| WSPGVVADGDLLMFLR                | Gug     | Grunge, isoform D (EC 3.5.1.98) (Grunge, isoform E)                                             | 896.459 | 2 | 56.45 | 1934292 | 56.29 | 935150  | 0.62803 |
| YGDPLAAK                        | Gug     | Grunge, isoform D (EC 3.5.1.98) (Grunge, isoform E)                                             | 417.721 | 2 | 19.02 | 1065996 | 19    | 938830  | 1.14407 |
| FLAPQAQGPVGLALDPIGILR           | BcDNA:R | Uncharacterized protein, isoform B (Uncharacterized protein, isoform E)                         | 1130.16 | 2 | 63.35 | 1256442 | 63.16 | 1860146 | 1.92321 |
| FLAPQAQGPVGLALDPIGILR           | BcDNA:R | Uncharacterized protein, isoform B (Uncharacterized protein, isoform E)                         | 753.779 | 3 | 63.38 | 2942061 | 63.13 | 4898123 | 2.16272 |
| SVQRPQAVNNR                     | BcDNA:R | Uncharacterized protein, isoform B (Uncharacterized protein, isoform E)                         | 634.845 | 2 | 9.41  | 110272  | 9.55  | 122764  | 1.4462  |
| SVQRPQAVNNR                     | BcDNA:R | Uncharacterized protein, isoform B (Uncharacterized protein, isoform E)                         | 423.565 | 3 | 9.37  | 375735  | 9.52  | 435353  | 1.50516 |
| TAGVGYAAQANPSVGASALLGGS         | BcDNA:R | Uncharacterized protein, isoform B (Uncharacterized protein, isoform E)                         | 920.702 | 4 | 36.12 | 888234  | 35.9  | 1594106 | 2.33137 |
| FVGPFTTRPVVTIMTLR               | Vap33   | VAMP-associated protein 33kDa, isoform A                                                        | 612.018 | 3 | 49.47 | 300313  | 49.3  | 756291  | 3.27143 |
| SLFDLPLTIEPEHELRL               | Vap33   | VAMP-associated protein 33kDa, isoform A                                                        | 637.007 | 3 | 51.03 | 379872  | 50.9  | 998731  | 3.41534 |
| ELEIEQR                         | eIF4B   | Eukaryotic translation initiation factor 4B, isoform E                                          | 458.74  | 2 | 17.88 | 4591316 | 17.9  | 2801196 | 0.79255 |
| QGGTSSLNVFGSAKPVDTAAR           | eIF4B   | Eukaryotic translation initiation factor 4B, isoform E                                          | 688.355 | 3 | 30.18 | 747833  | 30.12 | 321395  | 0.55829 |
| ELEIEQR                         | eIF4B   | Eukaryotic translation initiation factor 4B (Eukaryotic translation initiation factor 4B, isofo | 458.74  | 2 | 17.88 | 4591316 | 17.9  | 2801196 | 0.79255 |
| GQFNRPPELLR                     | eIF4B   | Eukaryotic translation initiation factor 4B (Eukaryotic translation initiation factor 4B, isofo | 410.563 | 3 | 24.81 | 1619273 | 24.76 | 1465741 | 1.17587 |
| QGGTSSLNVFGSAKPVDTAAR           | eIF4B   | Eukaryotic translation initiation factor 4B (Eukaryotic translation initiation factor 4B, isofo | 688.355 | 3 | 30.18 | 747833  | 30.12 | 321395  | 0.55829 |
| LLEANPNYSK                      | mfas    | FI19380p1 (Midline fasciclin, isoform J)                                                        | 574.801 | 2 | 18.6  | 422357  | 18.57 | 399268  | 1.22802 |
| LNLYSTHALFSDVMNR                | mfas    | FI19380p1 (Midline fasciclin, isoform J)                                                        | 632.981 | 3 | 38.73 | 372398  | 38.45 | 772695  | 2.6954  |
| LLEANPNYSK                      | mfas    | Midline fasciclin, isoform F (Midline fasciclin, isoform G) (Midline fasciclin, isof            | 574.801 | 2 | 18.6  | 422357  | 18.57 | 399268  | 1.22802 |
| LNLYSTHALFSDVMNR                | mfas    | Midline fasciclin, isoform F (Midline fasciclin, isoform G) (Midline fasciclin, isof            | 632.981 | 3 | 38.73 | 372398  | 38.45 | 772695  | 2.6954  |
| LLEANPNYSK                      | mfas    | Midline fasciclin, isoform E (Midline fasciclin, isoform O) (RH53953p)                          | 574.801 | 2 | 18.6  | 422357  | 18.57 | 399268  | 1.22802 |
| LNLYSTHALFSDVMNR                | mfas    | Midline fasciclin, isoform E (Midline fasciclin, isoform O) (RH53953p)                          | 632.981 | 3 | 38.73 | 372398  | 38.45 | 772695  | 2.6954  |
| LLEANPNYSK                      | mfas    | Midline fasciclin, isoform H (Midline fasciclin, isoform N)                                     | 574.801 | 2 | 18.6  | 422357  | 18.57 | 399268  | 1.22802 |
| LNLYSTHALFSDVMNR                | mfas    | Midline fasciclin, isoform H (Midline fasciclin, isoform N)                                     | 632.981 | 3 | 38.73 | 372398  | 38.45 | 772695  | 2.6954  |
| AASPASSVSSLSR                   | Gug     | Grunge, isoform C (EC 3.5.1.98)                                                                 | 610.317 | 2 | 19.87 | 670193  | 19.91 | 1047675 | 2.03072 |
| ALQALVK                         | Gug     | Grunge, isoform C (EC 3.5.1.98)                                                                 | 371.745 | 2 | 22.24 | 1429410 | 22.24 | 802676  | 0.72947 |
| ASPSVQISSSGGGPSGPGSVGPGC        | Gug     | Grunge, isoform C (EC 3.5.1.98)                                                                 | 862.663 | 4 | 27.81 | 128265  | 27.69 | 91817   | 0.9299  |
| MYAPQPGQR                       | Gug     | Grunge, isoform C (EC 3.5.1.98)                                                                 | 532.253 | 2 | 11.22 | 597570  | 11.23 | 396368  | 0.86165 |
| QHQAASAAAAAQQHK                 | Gug     | Grunge, isoform C (EC 3.5.1.98)                                                                 | 477.58  | 3 | 7.39  | 102108  | 7.46  | 61942   | 0.78804 |
| QSLHDQYFR                       | Gug     | Grunge, isoform C (EC 3.5.1.98)                                                                 | 398.528 | 3 | 18.86 | 599467  | 18.89 | 746793  | 1.61829 |
| SQSAIFVR                        | Gug     | Grunge, isoform C (EC 3.5.1.98)                                                                 | 454.253 | 2 | 22.57 | 2827859 | 22.59 | 2397174 | 1.10119 |
| WSPGVVADGDLLMFLR                | Gug     | Grunge, isoform C (EC 3.5.1.98)                                                                 | 888.461 | 2 | 59.21 | 701351  | 58.95 | 433086  | 0.80216 |
| WSPGVVADGDLLMFLR                | Gug     | Grunge, isoform C (EC 3.5.1.98)                                                                 | 896.459 | 2 | 56.45 | 1934292 | 56.29 | 935150  | 0.62803 |

|                         |         |                                                                            |         |   |       |          |       |          |         |
|-------------------------|---------|----------------------------------------------------------------------------|---------|---|-------|----------|-------|----------|---------|
| YGDPLAAK                | Gug     | Grunge, isoform C (EC 3.5.1.98)                                            | 417.721 | 2 | 19.02 | 1065996  | 19    | 938830   | 1.14407 |
| AIYDHHYSR               | Mf      | GH23305p (Mf2 protein) (Myofilin, isoform C) (Myofilin, isoform Q)         | 581.275 | 2 | 11.31 | 475566   | 11.41 | 651391   | 1.77932 |
| AIYDHHYSR               | Mf      | GH23305p (Mf2 protein) (Myofilin, isoform C) (Myofilin, isoform Q)         | 387.853 | 3 | 11.31 | 2895978  | 11.41 | 4746762  | 2.12924 |
| ASRPYSSYLDSPSYR         | Mf      | GH23305p (Mf2 protein) (Myofilin, isoform C) (Myofilin, isoform Q)         | 874.916 | 2 | 25.08 | 1194562  | 25.03 | 1397150  | 1.51935 |
| ASRPYSSYLDSPSYR         | Mf      | GH23305p (Mf2 protein) (Myofilin, isoform C) (Myofilin, isoform Q)         | 583.613 | 3 | 25.12 | 5487893  | 25.03 | 8501748  | 2.01245 |
| DKPLTPNSLVPLEYEPEDK     | Mf      | GH23305p (Mf2 protein) (Myofilin, isoform C) (Myofilin, isoform Q)         | 728.707 | 3 | 38.98 | 567161   | 38.81 | 728559   | 1.66871 |
| DTYGYSPR                | Mf      | GH23305p (Mf2 protein) (Myofilin, isoform C) (Myofilin, isoform Q)         | 479.717 | 2 | 14.86 | 2640775  | 14.83 | 2840777  | 1.39742 |
| FWQSYIR                 | Mf      | GH23305p (Mf2 protein) (Myofilin, isoform C) (Myofilin, isoform Q)         | 500.256 | 2 | 32.37 | 739255   | 32.25 | 1687659  | 2.9656  |
| LLAELNK                 | Mf      | GH23305p (Mf2 protein) (Myofilin, isoform C) (Myofilin, isoform Q)         | 400.747 | 2 | 22.38 | 846200   | 22.35 | 1253332  | 1.92405 |
| NHLEMIGR                | Mf      | GH23305p (Mf2 protein) (Myofilin, isoform C) (Myofilin, isoform Q)         | 493.248 | 2 | 12.87 | 1554021  | 12.91 | 1080925  | 0.90357 |
| SIYDEPATANER            | Mf      | GH23305p (Mf2 protein) (Myofilin, isoform C) (Myofilin, isoform Q)         | 683.318 | 2 | 18.42 | 9216683  | 18.42 | 15046478 | 2.12072 |
| YGLYLR                  | Mf      | GH23305p (Mf2 protein) (Myofilin, isoform C) (Myofilin, isoform Q)         | 392.721 | 2 | 28.26 | 5499678  | 28.16 | 8903475  | 2.10303 |
| GQIHDIIVLVGGSTR         | Hsc70-1 | AT07372p (Heat shock protein cognate 1, isoform C) (Heat shock protein cog | 726.402 | 2 | 27.66 | 141880   | 27.58 | 2013950  | 18.4395 |
| GQIHDIIVLVGGSTR         | Hsc70-1 | AT07372p (Heat shock protein cognate 1, isoform C) (Heat shock protein cog | 484.604 | 3 | 27.43 | 42940    | 27.54 | 4848927  | 146.692 |
| SINPDEAVAYGAAVQAAILHGDK | Hsc70-1 | AT07372p (Heat shock protein cognate 1, isoform C) (Heat shock protein cog | 770.729 | 3 | 49.12 | 5844145  | 48.87 | 6076260  | 1.35063 |
| LSEASQAADER             | Tm1     | SD21996p (Tropomyosin 1, isoform H)                                        | 696.816 | 2 | 11.57 | 343010   | 11.67 | 695696   | 2.63472 |
| LSEASQAADER             | Tm1     | RE08101p (Tropomyosin 1, isoform E)                                        | 696.816 | 2 | 11.57 | 343010   | 11.67 | 695696   | 2.63472 |
| ESQNSVAIQGSFQK          | CG32017 | F118814p1                                                                  | 761.878 | 2 | 21.85 | 406919   | 21.82 | 549063   | 1.75282 |
| LGEFGSSASGLSHSR         | CG32017 | F118814p1                                                                  | 497.911 | 3 | 21.34 | 530518   | 21.35 | 641053   | 1.5697  |
| SIFFGSNR                | CG32017 | F118814p1                                                                  | 464.238 | 2 | 29.33 | 812922   | 29.2  | 1231632  | 1.96813 |
| TVGEVFPK                | CG32017 | F118814p1                                                                  | 488.279 | 2 | 27.47 | 636932   | 27.35 | 627150   | 1.27909 |
| YYGAEMRPQTGASSIR        | CG32017 | F118814p1                                                                  | 601.621 | 3 | 16.64 | 244775   | 16.57 | 232617   | 1.23452 |
| RPATSGTGSVASSTAR        | Map205  | Microtubule-associated protein 205, isoform B                              | 753.387 | 2 | 9.41  | 74073    | 9.52  | 32583    | 0.57142 |
| AVIIVPIPQQK             | RpS7    | 40S ribosomal protein S7                                                   | 684.916 | 2 | 41.28 | 8471675  | 41.1  | 6545686  | 1.00371 |
| DLHITR                  | RpS7    | 40S ribosomal protein S7                                                   | 377.714 | 2 | 14.71 | 21152176 | 14.72 | 16014808 | 0.98353 |
| DVTFFPDNYLNV            | RpS7    | 40S ribosomal protein S7                                                   | 786.864 | 2 | 53.99 | 23061740 | 53.69 | 18809548 | 1.05952 |
| HVVVIAER                | RpS7    | 40S ribosomal protein S7                                                   | 461.777 | 2 | 15.49 | 20082808 | 15.46 | 11177676 | 0.72302 |
| IIKPGGSDPDDFEK          | RpS7    | 40S ribosomal protein S7                                                   | 759.378 | 2 | 20.47 | 4039644  | 20.43 | 3343605  | 1.07521 |
| IIKPGGSDPDDFEK          | RpS7    | 40S ribosomal protein S7                                                   | 506.588 | 3 | 20.47 | 25628294 | 20.43 | 25835260 | 1.30953 |
| IQIILVR                 | RpS7    | 40S ribosomal protein S7                                                   | 427.795 | 2 | 36.3  | 22111984 | 36.14 | 13910792 | 0.81723 |
| SIAQALVELEANSCLKPYLR    | RpS7    | 40S ribosomal protein S7                                                   | 1115.61 | 2 | 52.69 | 3635581  | 52.52 | 3184821  | 1.13798 |
| SIAQALVELEANSCLKPYLR    | RpS7    | 40S ribosomal protein S7                                                   | 744.074 | 3 | 52.73 | 38728332 | 52.56 | 37722616 | 1.26531 |
| SIAQALVELEANSCLKPYLR    | RpS7    | 40S ribosomal protein S7                                                   | 558.307 | 4 | 52.69 | 4180332  | 52.56 | 3628128  | 1.12744 |
| TLTAVYDAILEDLVFPAEIVGK  | RpS7    | 40S ribosomal protein S7                                                   | 1189.15 | 2 | 65.64 | 2919810  | 65.67 | 1234142  | 0.54908 |
| TLTAVYDAILEDLVFPAEIVGK  | RpS7    | 40S ribosomal protein S7                                                   | 793.102 | 3 | 65.64 | 2850982  | 65.67 | 1260429  | 0.57431 |
| VDTFTSVYK               | RpS7    | 40S ribosomal protein S7                                                   | 530.271 | 2 | 25.44 | 3847964  | 25.35 | 1682874  | 0.56812 |
| HLPLSGTVGGSSSSYLHK      | Saf-B   | Scaffold attachment factor B, isoform B                                    | 628.659 | 3 | 24.77 | 957648   | 24.64 | 1484691  | 2.01397 |
| SLASQDRPR               | Saf-B   | Scaffold attachment factor B, isoform B                                    | 515.275 | 2 | 9.17  | 51712    | 9.24  | 185037   | 4.64825 |
| STAAPGGATSSSTASSAAGSK   | Saf-B   | Scaffold attachment factor B, isoform B                                    | 833.898 | 2 | 10.54 | 309614   | 10.69 | 137118   | 0.5753  |
| TFIVQGFGNVGLHTTR        | Gdh     | Glutamate dehydrogenase                                                    | 582.981 | 3 | 38.87 | 1874134  | 38.58 | 1474266  | 1.02187 |
| GYAFVFTNR               | Syp     | Syncrip, isoform A                                                         | 588.296 | 2 | 35.44 | 514118   | 35.33 | 604713   | 1.52795 |
| GYAFVFTNR               | Syp     | Syncrip, isoform E                                                         | 588.296 | 2 | 35.44 | 514118   | 35.33 | 604713   | 1.52795 |
| AAVSGAVEQATLR           | P5cr-2  | Pyrroline-5-carboxylate reductase-like 2, isoform B (EC 1.5.1.2)           | 636.849 | 2 | 23.08 | 549773   | 23.1  | 334382   | 0.7901  |
| AIYDHHYSR               | Mf      | Myofilin, isoform E                                                        | 581.275 | 2 | 11.31 | 475566   | 11.41 | 651391   | 1.77932 |
| AIYDHHYSR               | Mf      | Myofilin, isoform E                                                        | 387.853 | 3 | 11.31 | 2895978  | 11.41 | 4746762  | 2.12924 |
| ASRPYSSYLDSPSYR         | Mf      | Myofilin, isoform E                                                        | 874.916 | 2 | 25.08 | 1194562  | 25.03 | 1397150  | 1.51935 |
| ASRPYSSYLDSPSYR         | Mf      | Myofilin, isoform E                                                        | 583.613 | 3 | 25.12 | 5487893  | 25.03 | 8501748  | 2.01245 |
| DKPLTPNSLVPLEYEPEDK     | Mf      | Myofilin, isoform E                                                        | 728.707 | 3 | 38.98 | 567161   | 38.81 | 728559   | 1.66871 |
| DTYGYSPR                | Mf      | Myofilin, isoform E                                                        | 479.717 | 2 | 14.86 | 2640775  | 14.83 | 2840777  | 1.39742 |
| FWQSYIR                 | Mf      | Myofilin, isoform E                                                        | 500.256 | 2 | 32.37 | 739255   | 32.25 | 1687659  | 2.9656  |
| LLAELNK                 | Mf      | Myofilin, isoform E                                                        | 400.747 | 2 | 22.38 | 846200   | 22.35 | 1253332  | 1.92405 |
| NHLEMIGR                | Mf      | Myofilin, isoform E                                                        | 493.248 | 2 | 12.87 | 1554021  | 12.91 | 1080925  | 0.90357 |
| SIYDEPATANER            | Mf      | Myofilin, isoform E                                                        | 683.318 | 2 | 18.42 | 9216683  | 18.42 | 15046478 | 2.12072 |

|                            |          |                                                                                 |         |   |       |         |       |         |         |
|----------------------------|----------|---------------------------------------------------------------------------------|---------|---|-------|---------|-------|---------|---------|
| YGLYLR                     | Mf       | Myofilin, isoform E                                                             | 392.721 | 2 | 28.26 | 5499678 | 28.16 | 8903475 | 2.10303 |
| HNILTVFPNR                 | CG10237  | MIP27352p                                                                       | 404.228 | 3 | 27.09 | 502708  | 26.54 | 832902  | 2.15229 |
| LLEAETDLLYPK               | CG10237  | MIP27352p                                                                       | 702.885 | 2 | 39.58 | 82213   | 39.35 | 456931  | 7.21992 |
| GANAPEDLTLR                | Mtpalpha | Mitochondrial trifunctional protein alpha subunit, isoform B (EC 1.1.1.211) (EC | 578.801 | 2 | 24.55 | 462048  | 24.52 | 491502  | 1.38185 |
| LGIVDLLVDPLGPGLPQAEQNTIEYL | Mtpalpha | Mitochondrial trifunctional protein alpha subunit, isoform B (EC 1.1.1.211) (EC | 1012.22 | 3 | 65.71 | 94515   | 65.42 | 318192  | 4.37332 |
| TAVQVANDLASGK              | Mtpalpha | Mitochondrial trifunctional protein alpha subunit, isoform B (EC 1.1.1.211) (EC | 637.341 | 2 | 24.73 | 1414991 | 24.64 | 1190450 | 1.0929  |
| VNSLGSEVSDEFER             | Mtpalpha | Mitochondrial trifunctional protein alpha subunit, isoform B (EC 1.1.1.211) (EC | 784.365 | 2 | 31.55 | 326081  | 31.42 | 504128  | 2.00834 |
| FVFDVFEFAQK                | mmy      | Mummy, isoform B (EC 2.7.7.23) (Mummy, isoform D)                               | 688.848 | 2 | 54.52 | 25125   | 54.13 | 69150   | 3.57527 |
| TALTHYLEITAIPR             | Cpr      | Cytochrome P450 reductase, isoform B (EC 1.-.-.-) (EC 1.6.2.4)                  | 533.635 | 3 | 40.81 | 57301   | 40.62 | 150767  | 3.41796 |
| VFSVHPVFR                  | pst      | GH06117p (Pastrel, isoform F)                                                   | 363.206 | 3 | 30.19 | 12544   | 30.2  | 609080  | 63.0755 |
| VSQPIPGSHAGSGR             | pst      | GH06117p (Pastrel, isoform F)                                                   | 675.35  | 2 | 15.96 | 162655  | 12.19 | 118004  | 0.94244 |
| VFSVHPVFR                  | pst      | Pastrel, isoform E (Pastrel, isoform G)                                         | 363.206 | 3 | 30.19 | 12544   | 30.2  | 609080  | 63.0755 |
| VSQPIPGSHAGSGR             | pst      | Pastrel, isoform E (Pastrel, isoform G)                                         | 675.35  | 2 | 15.96 | 162655  | 12.19 | 118004  | 0.94244 |
| AASPASSVSSLSR              | Gug      | Grunge, isoform A (EC 3.5.1.98)                                                 | 610.317 | 2 | 19.87 | 670193  | 19.91 | 1047675 | 2.03072 |
| ALQALVK                    | Gug      | Grunge, isoform A (EC 3.5.1.98)                                                 | 371.745 | 2 | 22.24 | 1429410 | 22.24 | 802676  | 0.72947 |
| ASPSVQISSSGGGPSGPGSVGPGC   | Gug      | Grunge, isoform A (EC 3.5.1.98)                                                 | 862.663 | 4 | 27.81 | 128265  | 27.69 | 91817   | 0.9299  |
| MSYADQLQAAEFQR             | Gug      | Grunge, isoform A (EC 3.5.1.98)                                                 | 829.386 | 2 | 32.37 | 172984  | 32.33 | 256318  | 1.92484 |
| MYAPQPGQR                  | Gug      | Grunge, isoform A (EC 3.5.1.98)                                                 | 532.253 | 2 | 11.22 | 597570  | 11.23 | 396368  | 0.86165 |
| QHQAASAAAAAQQHK            | Gug      | Grunge, isoform A (EC 3.5.1.98)                                                 | 477.58  | 3 | 7.39  | 102108  | 7.46  | 61942   | 0.78804 |
| QSLHDQYFR                  | Gug      | Grunge, isoform A (EC 3.5.1.98)                                                 | 398.528 | 3 | 18.86 | 599467  | 18.89 | 746793  | 1.61829 |
| SQSAIFVR                   | Gug      | Grunge, isoform A (EC 3.5.1.98)                                                 | 454.253 | 2 | 22.57 | 2827859 | 22.59 | 2397174 | 1.10119 |
| WSPGVVADGDLLMFLR           | Gug      | Grunge, isoform A (EC 3.5.1.98)                                                 | 888.461 | 2 | 59.21 | 701351  | 58.95 | 433086  | 0.80216 |
| WSPGVVADGDLLMFLR           | Gug      | Grunge, isoform A (EC 3.5.1.98)                                                 | 896.459 | 2 | 56.45 | 1934292 | 56.29 | 935150  | 0.62803 |
| YGDPLAAK                   | Gug      | Grunge, isoform A (EC 3.5.1.98)                                                 | 417.721 | 2 | 19.02 | 1065996 | 19    | 938830  | 1.14407 |
| STVPFATSESNR               | Zasp66   | Z band alternatively spliced PDZ-motif protein 66, isoform E                    | 648.315 | 2 | 21.89 | 228788  | 21.86 | 230532  | 1.30894 |
| AIGAGGQSTQVR               | Sap130   | Sin3A-associated protein 130, isoform B (Sin3A-associated protein 130, isofo    | 572.807 | 2 | 12.25 | 925618  | 12.32 | 536264  | 0.75261 |
| GPGAGGTALTATNLPTR          | Sap130   | Sin3A-associated protein 130, isoform B (Sin3A-associated protein 130, isofo    | 828.439 | 2 | 27.36 | 569694  | 27.23 | 266622  | 0.60796 |
| IGDQPATGGAGGR              | Sap130   | Sin3A-associated protein 130, isoform B (Sin3A-associated protein 130, isofo    | 578.789 | 2 | 10.2  | 451645  | 10.33 | 79684   | 0.22919 |
| IIQLQPATGTTQQIIGSGAR       | Sap130   | Sin3A-associated protein 130, isoform B (Sin3A-associated protein 130, isofo    | 727.738 | 3 | 34.41 | 1767358 | 34.26 | 2314474 | 1.70118 |
| QLENVATGR                  | Sap130   | Sin3A-associated protein 130, isoform B (Sin3A-associated protein 130, isofo    | 544.788 | 2 | 15.37 | 399235  | 15.31 | 452872  | 1.47356 |
| SDGGGGISIAGTPILSGGTIK      | Sap130   | Sin3A-associated protein 130, isoform B (Sin3A-associated protein 130, isofo    | 929.499 | 2 | 41.44 | 945778  | 41.22 | 943168  | 1.29545 |
| TQITAIPAAPAR               | Sap130   | Sin3A-associated protein 130, isoform B (Sin3A-associated protein 130, isofo    | 605.351 | 2 | 25.4  | 3213530 | 25.35 | 3375310 | 1.36444 |
| VQPSLTITQLNPIGK            | Sap130   | Sin3A-associated protein 130, isoform B (Sin3A-associated protein 130, isofo    | 804.97  | 2 | 41.17 | 1625853 | 40.98 | 1635254 | 1.30655 |
| VTHGVASSAASVPATVGPVNSTR    | Sap130   | Sin3A-associated protein 130, isoform B (Sin3A-associated protein 130, isofo    | 722.382 | 3 | 23.81 | 505024  | 23.8  | 708422  | 1.82223 |
| VTTGAGNPQQATASGALVSSFMR    | Sap130   | Sin3A-associated protein 130, isoform B (Sin3A-associated protein 130, isofo    | 756.374 | 3 | 32.37 | 491161  | 32.25 | 670045  | 1.77216 |
| AIGAGGQSTQVR               | Sap130   | Sin3A-associated protein 130, isoform C                                         | 572.807 | 2 | 12.25 | 925618  | 12.32 | 536264  | 0.75261 |
| GPGAGGTALTATNLPTR          | Sap130   | Sin3A-associated protein 130, isoform C                                         | 828.439 | 2 | 27.36 | 569694  | 27.23 | 266622  | 0.60796 |
| IGDQPATGGAGGR              | Sap130   | Sin3A-associated protein 130, isoform C                                         | 578.789 | 2 | 10.2  | 451645  | 10.33 | 79684   | 0.22919 |
| IIQLQPATGTTQQIIGSGAR       | Sap130   | Sin3A-associated protein 130, isoform C                                         | 727.738 | 3 | 34.41 | 1767358 | 34.26 | 2314474 | 1.70118 |
| QLENVATGR                  | Sap130   | Sin3A-associated protein 130, isoform C                                         | 544.788 | 2 | 15.37 | 399235  | 15.31 | 452872  | 1.47356 |
| SDGGGGISIAGTPILSGGTIK      | Sap130   | Sin3A-associated protein 130, isoform C                                         | 929.499 | 2 | 41.44 | 945778  | 41.22 | 943168  | 1.29545 |
| TQITAIPAAPAR               | Sap130   | Sin3A-associated protein 130, isoform C                                         | 605.351 | 2 | 25.4  | 3213530 | 25.35 | 3375310 | 1.36444 |
| VQPSLTITQLNPIGK            | Sap130   | Sin3A-associated protein 130, isoform C                                         | 804.97  | 2 | 41.17 | 1625853 | 40.98 | 1635254 | 1.30655 |
| VTHGVASSAASVPATVGPVNSTR    | Sap130   | Sin3A-associated protein 130, isoform C                                         | 722.382 | 3 | 23.81 | 505024  | 23.8  | 708422  | 1.82223 |
| VTTGAGNPQQATASGALVSSFMR    | Sap130   | Sin3A-associated protein 130, isoform C                                         | 756.374 | 3 | 32.37 | 491161  | 32.25 | 670045  | 1.77216 |
| DGVLTVDAPLPALTAGETLIPIAHK  | HspB8    | RE23625p (RE52196p)                                                             | 838.139 | 3 | 55.9  | 27215   | 55.42 | 322725  | 15.4045 |
| GVNPESIR                   | HspB8    | RE23625p (RE52196p)                                                             | 436.235 | 2 | 16.4  | 162532  | 16.45 | 263810  | 2.10851 |
| STISINVAGASLTR             | ens      | Ensconsin, isoform D                                                            | 682.362 | 2 | 25.86 | 816429  | 25.79 | 694557  | 1.10513 |
| STISINVAGASLTR             | ens      | Ensconsin, isoform E (Ensconsin, isoform L) (LP21080p)                          | 682.362 | 2 | 25.86 | 816429  | 25.79 | 694557  | 1.10513 |
| STISINVAGASLTR             | ens      | Ensconsin, isoform C                                                            | 682.362 | 2 | 25.86 | 816429  | 25.79 | 694557  | 1.10513 |
| YYLGIFFK                   | tfc      | LP02252p (Triforce, isoform B)                                                  | 525.787 | 2 | 48.48 | 464111  | 48.22 | 385306  | 1.07847 |
| SIFSNFQQVK                 | prom     | Prominin, isoform C                                                             | 647.843 | 2 | 36.49 | 1196743 | 36.37 | 1335180 | 1.44931 |
| TLQEDQSIQR                 | prom     | Prominin, isoform C                                                             | 618.815 | 2 | 28.08 | 1390520 | 28.05 | 1856704 | 1.73455 |

|                             |           |                                                                                          |         |   |       |         |       |          |         |
|-----------------------------|-----------|------------------------------------------------------------------------------------------|---------|---|-------|---------|-------|----------|---------|
| VALQIQDVATSSR               | prom      | Prominin, isoform C                                                                      | 694.381 | 2 | 29.91 | 3286792 | 29.77 | 3985799  | 1.57531 |
| LAVNMVFPFR                  | betaTub9  | Tubulin beta chain                                                                       | 572.321 | 2 | 40.41 | 1793279 | 40.19 | 932227   | 0.6753  |
| LAVNMVFPFR                  | betaTub9  | Tubulin beta chain                                                                       | 580.318 | 2 | 34.29 | 768535  | 34.41 | 1250344  | 2.11343 |
| NSSYFVEWIPNNVK              | betaTub9  | Tubulin beta chain                                                                       | 848.92  | 2 | 44.43 | 6003407 | 44.1  | 632379   | 0.13684 |
| HHIDIVLIR                   | CG5028    | RH49423p                                                                                 | 406.231 | 3 | 27.73 | 408874  | 27.61 | 208947   | 0.66385 |
| FAPAPYFF                    | BcDNA:R   | RE26528p                                                                                 | 480.237 | 2 | 51.83 | 770165  | 51.51 | 848406   | 1.43101 |
| FGFGPFAAPLAAPVPAPLAVAPK     | BcDNA:R   | RE26528p                                                                                 | 736.086 | 3 | 58.91 | 2617017 | 58.71 | 3247207  | 1.61185 |
| VAFAPAPVAAPLGFAPAPAPVAF     | BcDNA:R   | RE26528p                                                                                 | 886.832 | 3 | 53.11 | 2925984 | 52.83 | 3692163  | 1.6392  |
| MQGLGLQSLK                  | ND-MLRC   | GEO09626p1 (NADH dehydrogenase (Ubiquinone) MLRQ subunit, isoform A)                     | 545.8   | 2 | 28.03 | 3087470 | 28    | 3232792  | 1.36018 |
| NPALIPLYVCVGAGAIGAVYYMAR    | ND-MLRC   | GEO09626p1 (NADH dehydrogenase (Ubiquinone) MLRQ subunit, isoform A)                     | 847.112 | 3 | 63.46 | 114000  | 63.09 | 237220   | 2.70314 |
| NPDVTWNR                    | ND-MLRC   | GEO09626p1 (NADH dehydrogenase (Ubiquinone) MLRQ subunit, isoform A)                     | 501.244 | 2 | 19.41 | 1214944 | 19.37 | 904787   | 0.96741 |
| TSNPEPWQEYK                 | ND-MLRC   | GEO09626p1 (NADH dehydrogenase (Ubiquinone) MLRQ subunit, isoform A)                     | 689.817 | 2 | 25.23 | 750152  | 25.18 | 899126   | 1.55702 |
| ELEIEQR                     | eIF4B     | Eukaryotic initiation factor 4B (Eukaryotic translation initiation factor 4B, isoform A) | 458.74  | 2 | 17.88 | 4591316 | 17.9  | 2801196  | 0.79255 |
| QGGTSSLNVFGSAKPVDTAAR       | eIF4B     | Eukaryotic initiation factor 4B (Eukaryotic translation initiation factor 4B, isoform B) | 688.355 | 3 | 30.18 | 747833  | 30.12 | 321395   | 0.55829 |
| HSITSGGGGGGFR               | Rsf1      | RE39606p (Repressor splicing factor 1, isoform B)                                        | 638.805 | 2 | 12.65 | 1063621 | 12.67 | 1034087  | 1.26297 |
| HSITSGGGGGGFR               | Rsf1      | RE39606p (Repressor splicing factor 1, isoform B)                                        | 426.206 | 3 | 12.65 | 1459305 | 12.67 | 1825302  | 1.62484 |
| VYVGNLTDK                   | Rsf1      | RE39606p (Repressor splicing factor 1, isoform B)                                        | 504.772 | 2 | 21.41 | 1430452 | 21.39 | 1257685  | 1.14214 |
| YSSGSSASYGR                 | Rsf1      | RE39606p (Repressor splicing factor 1, isoform B)                                        | 561.247 | 2 | 9.59  | 527731  | 9.71  | 255024   | 0.62776 |
| TLVYVLVK                    | TwdIE     | RE71854p (TweedleE)                                                                      | 467.802 | 2 | 36.56 | 5020293 | 36.32 | 6917808  | 1.79004 |
| EAVGAFIVFDVTR               | Rab32     | LD04613p (Rab32, isoform C) (Rab32, isoform E)                                           | 712.383 | 2 | 49.81 | 1401007 | 49.56 | 1390509  | 1.28931 |
| ALYSNEINQK                  | Mpp6      | GEO07784p1 (M phase phosphoprotein 6) (M-phase phosphoprotein 6, isoform A)              | 590.304 | 2 | 18.79 | 615618  | 18.77 | 286252   | 0.60403 |
| ATSPDSSDVIIAR               | Cpr49Ae   | Cuticular protein 49Ae (GEO04354p1) (LD46766p)                                           | 666.344 | 2 | 23.06 | 746167  | 23.1  | 1286669  | 2.24003 |
| IIGEYGLR                    | RpS9      | GEO04282p1 (LD32106p) (Ribosomal protein S9, isoform B)                                  | 460.764 | 2 | 25.97 | 1566590 | 25.94 | 2123615  | 1.76093 |
| LFQGNALLR                   | RpS9      | GEO04282p1 (LD32106p) (Ribosomal protein S9, isoform B)                                  | 516.303 | 2 | 32.83 | 1000199 | 32.72 | 375882   | 0.48819 |
| LTTSSHLTQFGTVENANTPGATAR    | G9a       | G9a, isoform A (EC 2.1.1.43) (LD10743p)                                                  | 825.414 | 3 | 27.32 | 294736  | 27.19 | 352075   | 1.55176 |
| LSEASQAADER                 | Tm1       | GH09289p (LD11194p) (Tropomyosin 1, isoform C) (Tropomyosin 1, isoform I)                | 696.816 | 2 | 11.57 | 343010  | 11.67 | 695696   | 2.63472 |
| LITPVVLQR                   | RpS6      | 40S ribosomal protein S6                                                                 | 519.837 | 2 | 34.36 | 2782314 | 34.22 | 2911970  | 1.35957 |
| GYAFVFTNR                   | Syp       | GH28335p (Syncrip, isoform C)                                                            | 588.296 | 2 | 35.44 | 514118  | 35.33 | 604713   | 1.52795 |
| STVPFATSESNR                | Zasp66    | GH19182p (Z band alternatively spliced PDZ-motif protein 66, isoform F)                  | 648.315 | 2 | 21.89 | 228788  | 21.86 | 230532   | 1.30894 |
| AGSEPYVPPPSYWNR             | Mf        | GH14252p (Mf3 protein) (Myofilin, isoform D) (RH68506p)                                  | 860.41  | 2 | 33.23 | 748487  | 33.06 | 1566838  | 2.71933 |
| AIYDHHYSR                   | Mf        | GH14252p (Mf3 protein) (Myofilin, isoform D) (RH68506p)                                  | 581.275 | 2 | 11.31 | 475566  | 11.41 | 651391   | 1.77932 |
| AIYDHHYSR                   | Mf        | GH14252p (Mf3 protein) (Myofilin, isoform D) (RH68506p)                                  | 387.853 | 3 | 11.31 | 2895978 | 11.41 | 4746762  | 2.12924 |
| ASRPYSSYLDSPSYR             | Mf        | GH14252p (Mf3 protein) (Myofilin, isoform D) (RH68506p)                                  | 874.916 | 2 | 25.08 | 1194562 | 25.03 | 1397150  | 1.51935 |
| ASRPYSSYLDSPSYR             | Mf        | GH14252p (Mf3 protein) (Myofilin, isoform D) (RH68506p)                                  | 583.613 | 3 | 25.12 | 5487893 | 25.03 | 8501748  | 2.01245 |
| ASSLEPLDELFER               | Mf        | GH14252p (Mf3 protein) (Myofilin, isoform D) (RH68506p)                                  | 753.378 | 2 | 48.45 | 4498040 | 48.19 | 5102070  | 1.47348 |
| DKPLTPNSLVPLEYEPEDK         | Mf        | GH14252p (Mf3 protein) (Myofilin, isoform D) (RH68506p)                                  | 728.707 | 3 | 38.98 | 567161  | 38.81 | 728559   | 1.66871 |
| DSYLSPVK                    | Mf        | GH14252p (Mf3 protein) (Myofilin, isoform D) (RH68506p)                                  | 454.74  | 2 | 22.04 | 1523720 | 22.02 | 1430945  | 1.21994 |
| DTYGYSPR                    | Mf        | GH14252p (Mf3 protein) (Myofilin, isoform D) (RH68506p)                                  | 479.717 | 2 | 14.86 | 2640775 | 14.83 | 2840777  | 1.39742 |
| FWQSYIR                     | Mf        | GH14252p (Mf3 protein) (Myofilin, isoform D) (RH68506p)                                  | 500.256 | 2 | 32.37 | 739255  | 32.25 | 1687659  | 2.9656  |
| GGSPVFDNR                   | Mf        | GH14252p (Mf3 protein) (Myofilin, isoform D) (RH68506p)                                  | 417.709 | 2 | 19.86 | 5727839 | 19.85 | 7157511  | 1.62328 |
| LLAELNK                     | Mf        | GH14252p (Mf3 protein) (Myofilin, isoform D) (RH68506p)                                  | 400.747 | 2 | 22.38 | 846200  | 22.35 | 1253332  | 1.92405 |
| LPIFHPR                     | Mf        | GH14252p (Mf3 protein) (Myofilin, isoform D) (RH68506p)                                  | 440.264 | 2 | 24.47 | 512417  | 24.48 | 315832   | 0.80067 |
| NHLEMIGR                    | Mf        | GH14252p (Mf3 protein) (Myofilin, isoform D) (RH68506p)                                  | 493.248 | 2 | 12.87 | 1554021 | 12.91 | 1080925  | 0.90357 |
| SASPFRRPAR                  | Mf        | GH14252p (Mf3 protein) (Myofilin, isoform D) (RH68506p)                                  | 494.77  | 2 | 13.46 | 1272464 | 13.42 | 1443660  | 1.47381 |
| SIYDEPATANER                | Mf        | GH14252p (Mf3 protein) (Myofilin, isoform D) (RH68506p)                                  | 683.318 | 2 | 18.42 | 9216683 | 18.42 | 15046478 | 2.12072 |
| YGLYLR                      | Mf        | GH14252p (Mf3 protein) (Myofilin, isoform D) (RH68506p)                                  | 392.721 | 2 | 28.26 | 5499678 | 28.16 | 8903475  | 2.10303 |
| VVYDPQTAELSSK               | ScsbetaA  | Succinate--CoA ligase [ADP-forming] subunit beta, mitochondrial (EC 6.2.1.5)             | 783.388 | 2 | 26.05 | 1092441 | 25.98 | 763625   | 0.90804 |
| ANAVAAPFR                   | simj      | LD33361p (Simjang, isoform C)                                                            | 458.754 | 2 | 21.85 | 720615  | 21.82 | 738030   | 1.33043 |
| GLSVTPTSAVPLPAHSK           | simj      | LD33361p (Simjang, isoform C)                                                            | 583.656 | 3 | 30.14 | 968499  | 29.97 | 1592607  | 2.13615 |
| SSLPAGATLAAGTTITPATSSSHR    | simj      | LD33361p (Simjang, isoform C)                                                            | 752.392 | 3 | 30.52 | 3143778 | 30.4  | 4148506  | 1.7142  |
| SSLSGGGPAVSISATNSR          | simj      | LD33361p (Simjang, isoform C)                                                            | 867.934 | 2 | 24.08 | 1895042 | 24.04 | 2008027  | 1.37649 |
| TNLPNLTITPSVTITPTSAPPSSLKPF | simj      | LD33361p (Simjang, isoform C)                                                            | 935.19  | 3 | 42.52 | 2161882 | 42.25 | 1939128  | 1.16519 |
| ILFAGFPVVEPYTTEHTVAK        | alpha-Est | Carboxylic ester hydrolase (EC 3.1.1.-)                                                  | 773.419 | 3 | 44.7  | 30930   | 48.23 | 75260    | 3.16087 |

|                            |           |                                                                                                          |         |   |       |          |       |         |         |
|----------------------------|-----------|----------------------------------------------------------------------------------------------------------|---------|---|-------|----------|-------|---------|---------|
| HNILTVFPNR                 | CG10237   | Uncharacterized protein, isoform A (Uncharacterized protein, isoform D)                                  | 404.228 | 3 | 27.09 | 502708   | 26.54 | 832902  | 2.15229 |
| LLEAETDLLYPK               | CG10237   | Uncharacterized protein, isoform A (Uncharacterized protein, isoform D)                                  | 702.885 | 2 | 39.58 | 82213    | 39.35 | 456931  | 7.21992 |
| STISINVAGASLTR             | ens       | Ensconsin, isoform A (LD09626p)                                                                          | 682.362 | 2 | 25.86 | 816429   | 25.79 | 694557  | 1.10513 |
| SAGLTPDLSNFTETR            | sbb       | Brakeless-B (Scribbler long isoform) (Scribbler, isoform D) (Scribbler, isoform D)                       | 804.897 | 2 | 36.67 | 741872   | 36.56 | 971672  | 1.70143 |
| TSPGFSGVGVGAASSK           | sbb       | Brakeless-B (Scribbler long isoform) (Scribbler, isoform D) (Scribbler, isoform D)                       | 704.857 | 2 | 24.77 | 1117813  | 24.76 | 1320748 | 1.53488 |
| GANAPEDLTLR                | Mtpalpha  | BcDNA.GH12558 (Mitochondrial trifunctional protein alpha subunit, isoform A)                             | 578.801 | 2 | 24.55 | 462048   | 24.52 | 491502  | 1.38185 |
| LGIVDLLVDPLGPGLQPAEQNTIEYL | Mtpalpha  | BcDNA.GH12558 (Mitochondrial trifunctional protein alpha subunit, isoform A)                             | 1012.22 | 3 | 65.71 | 94515    | 65.42 | 318192  | 4.37332 |
| TAVQVANDLASGK              | Mtpalpha  | BcDNA.GH12558 (Mitochondrial trifunctional protein alpha subunit, isoform A)                             | 637.341 | 2 | 24.73 | 1414991  | 24.64 | 1190450 | 1.0929  |
| VNSLGSSEVSDEFER            | Mtpalpha  | BcDNA.GH12558 (Mitochondrial trifunctional protein alpha subunit, isoform A)                             | 784.365 | 2 | 31.55 | 326081   | 31.42 | 504128  | 2.00834 |
| LIVGNLDYGVSNNTDIK          | Ref1      | LD24793p (RNA and export factor binding protein 1)                                                       | 860.959 | 2 | 37.95 | 1201336  | 37.75 | 1078970 | 1.16672 |
| RPVGGKPAAGGQR              | Ref1      | LD24793p (RNA and export factor binding protein 1)                                                       | 625.857 | 2 | 7.23  | 50720    | 7.22  | 20708   | 0.53037 |
| RPVGGKPAAGGQR              | Ref1      | LD24793p (RNA and export factor binding protein 1)                                                       | 417.574 | 3 | 7.23  | 135020   | 7.2   | 45108   | 0.43399 |
| SLGTADVIFER                | Ref1      | LD24793p (RNA and export factor binding protein 1)                                                       | 604.32  | 2 | 35.16 | 5397913  | 34.98 | 6047044 | 1.45526 |
| LNELLATPIFNER              | REG       | LD45860p (Proteasome regulator dREG) (REG, isoform A) (REG, isoform B)                                   | 765.42  | 2 | 44.66 | 196314   | 44.39 | 478969  | 3.16941 |
| VPVPQPYEVIR                | Vajk3     | HL02234p (RH05666p) (Vajk3)                                                                              | 648.869 | 2 | 34.29 | 1028304  | 34.15 | 1020137 | 1.28872 |
| VPVVSHSVVK                 | Vajk3     | HL02234p (RH05666p) (Vajk3)                                                                              | 525.819 | 2 | 16.6  | 543779   | 16.57 | 824515  | 1.96969 |
| VPVVSHSVVK                 | Vajk3     | HL02234p (RH05666p) (Vajk3)                                                                              | 350.882 | 3 | 16.6  | 274491   | 16.57 | 456956  | 2.16256 |
| ACHDSGEELDDISLPK           | MBD-like  | Methyl-CpG binding domain protein-like, isoform B (Methyl-CpG binding domain protein-like, isoform B)    | 893.402 | 2 | 30.72 | 859129   | 30.56 | 663495  | 1.00323 |
| ACHDSGEELDDISLPK           | MBD-like  | Methyl-CpG binding domain protein-like, isoform B (Methyl-CpG binding domain protein-like, isoform B)    | 595.937 | 3 | 30.68 | 4227121  | 30.52 | 3334801 | 1.02482 |
| TDVSLVPIR                  | MBD-like  | Methyl-CpG binding domain protein-like, isoform B (Methyl-CpG binding domain protein-like, isoform B)    | 548.822 | 2 | 35.16 | 14387869 | 35.02 | 9195601 | 0.83024 |
| TVGPNVNEQTVLQSVATALHMLNA   | MBD-like  | Methyl-CpG binding domain protein-like, isoform B (Methyl-CpG binding domain protein-like, isoform B)    | 847.937 | 4 | 61.34 | 1644970  | 61.29 | 1228563 | 0.9702  |
| TVGPNVNEQTVLQSVATALHMLNA   | MBD-like  | Methyl-CpG binding domain protein-like, isoform B (Methyl-CpG binding domain protein-like, isoform B)    | 851.936 | 4 | 55.74 | 1113659  | 55.85 | 795373  | 0.92777 |
| GGPRPGGFGGGPR              | vig       | LD07162p (Vasa intronic gene, isoform A) (Vasa intronic gene, isoform B) (Vasa intronic gene, isoform B) | 390.204 | 3 | 13.98 | 2034032  | 13.94 | 2758189 | 1.76152 |
| VLDIQFNFNDR                | vig       | LD07162p (Vasa intronic gene, isoform A) (Vasa intronic gene, isoform B) (Vasa intronic gene, isoform B) | 719.36  | 2 | 42.3  | 932723   | 42.11 | 1042745 | 1.45227 |
| LFLFVSQHTF                 | CT7856    | RE68558p                                                                                                 | 619.832 | 2 | 48.93 | 1575091  | 48.71 | 1713018 | 1.41279 |
| NFPALTYFR                  | I(2)01289 | L(2)01289 long form (Lethal (2) 01289, isoform B)                                                        | 564.795 | 2 | 42.88 | 433584   | 42.79 | 472450  | 1.41548 |
| AHVHYVTEHGIASLFGK          | anon-WO   | GM14349p                                                                                                 | 492.014 | 4 | 35.01 | 514891   | 35.22 | 487169  | 1.2291  |
| FYSGFGGQVDFIR              | anon-WO   | GM14349p                                                                                                 | 746.865 | 2 | 42.05 | 2238795  | 41.9  | 2390076 | 1.38682 |
| IVGSFLIGDK                 | anon-WO   | GM14349p                                                                                                 | 524.805 | 2 | 36.77 | 1627498  | 36.56 | 1359424 | 1.08507 |
| LIVAQINPK                  | anon-WO   | GM14349p                                                                                                 | 498.316 | 2 | 27.09 | 1231167  | 26.93 | 998622  | 1.05367 |
| SGDTVAFAGAAATPVALLNAMAK    | anon-WO   | GM14349p                                                                                                 | 711.705 | 3 | 54.28 | 110880   | 53.97 | 130931  | 1.53395 |
| SHFDLAIIEVTDLPQHGTGK       | anon-WO   | GM14349p                                                                                                 | 727.359 | 3 | 37.31 | 553164   | 37.15 | 209091  | 0.49103 |
| LAVNMVFPFR                 | betaTub9  | Tubulin beta chain                                                                                       | 572.321 | 2 | 40.41 | 1793279  | 40.19 | 932227  | 0.6753  |
| LAVNMVFPFR                 | betaTub9  | Tubulin beta chain                                                                                       | 580.318 | 2 | 34.29 | 768535   | 34.41 | 1250344 | 2.11343 |
| NSSYFVEWIPNNVK             | betaTub9  | Tubulin beta chain                                                                                       | 848.92  | 2 | 44.43 | 6003407  | 44.1  | 632379  | 0.13684 |
| SVVAVFAQGTEQR              | FBXL8     | FI05230p                                                                                                 | 696.368 | 2 | 30.76 | 1164648  | 30.64 | 1327554 | 1.48074 |
| VQVGHAPSPNLK               | tau       | Microtubule-associated protein                                                                           | 416.235 | 3 | 17.44 | 993769   | 17.41 | 1404801 | 1.83633 |
| VQVGHAPSPNLK               | tau       | Microtubule-associated protein                                                                           | 416.235 | 3 | 17.44 | 993769   | 17.41 | 1404801 | 1.83633 |
| SLSAIQEQLQQR               | I(3)mbt   | LD05287p (Lethal (3) malignant brain tumor)                                                              | 700.878 | 2 | 29.29 | 410006   | 29.17 | 437411  | 1.38587 |
| TLVYVLVK                   | Twd1T     | LP07342p (TweedleT)                                                                                      | 467.802 | 2 | 36.56 | 5020293  | 36.32 | 6917808 | 1.79004 |
| YTAHDISFEK                 | RpL27     | 60S ribosomal protein L27                                                                                | 404.196 | 3 | 20.71 | 543502   | 20.72 | 879409  | 2.1019  |
| DLLHPLPAEEK                | RpS27     | 40S ribosomal protein S27                                                                                | 421.231 | 3 | 30.37 | 2013778  | 30.24 | 3941259 | 2.54241 |
| DLGGQSTTQDFTR              | ldh3b     | GH26270p (Isocitrate dehydrogenase 3b, isoform A) (EC 1.1.1.41) (Isocitrate dehydrogenase 3b, isoform A) | 713.334 | 2 | 21.19 | 367303   | 21.19 | 267232  | 0.94512 |
| GYAFVFTNR                  | Syp       | Syncr1p, isoform D                                                                                       | 588.296 | 2 | 35.44 | 514118   | 35.33 | 604713  | 1.52795 |
| VVVQNHIENLNR               | CG6013    | GH10002p                                                                                                 | 521.946 | 3 | 20.7  | 653310   | 20.72 | 528670  | 1.05121 |
| LTSLTEDVAAPDAPFR           | Wdr37     | GH17724p                                                                                                 | 965.991 | 2 | 42.05 | 480078   | 41.83 | 526368  | 1.4243  |
| AAVSGAVEQATLR              | P5cr-2    | Pyrroline-5-carboxylate reductase (EC 1.5.1.2)                                                           | 636.849 | 2 | 23.08 | 549773   | 23.1  | 334382  | 0.7901  |
| GLLLFVDEADAFRL             | bor       | ATPase family AAA domain-containing protein 3A homolog (Belphegor protein)                               | 789.93  | 2 | 61.99 | 401366   | 61.79 | 319540  | 1.03421 |
| HSEQPAGVIVALTADQHR         | AOX3      | Aldehyde oxidase 3, isoform A (EC 1.17.1.4) (EC 1.2.3.1) (Aldehyde oxidase 3, isoform A)                 | 667.348 | 3 | 33.16 | 29495    | 33.17 | 355033  | 15.6366 |
| AIYDHHYSR                  | Mf        | MIP06926p (Myofilin, isoform A) (Myofilin, isoform G) (Myofilin, isoform N)                              | 581.275 | 2 | 11.31 | 475566   | 11.41 | 651391  | 1.77932 |
| AIYDHHYSR                  | Mf        | MIP06926p (Myofilin, isoform A) (Myofilin, isoform G) (Myofilin, isoform N)                              | 387.853 | 3 | 11.31 | 2895978  | 11.41 | 4746762 | 2.12924 |
| ASRPYSSYLDSPSYR            | Mf        | MIP06926p (Myofilin, isoform A) (Myofilin, isoform G) (Myofilin, isoform N)                              | 874.916 | 2 | 25.08 | 1194562  | 25.03 | 1397150 | 1.51935 |
| ASRPYSSYLDSPSYR            | Mf        | MIP06926p (Myofilin, isoform A) (Myofilin, isoform G) (Myofilin, isoform N)                              | 583.613 | 3 | 25.12 | 5487893  | 25.03 | 8501748 | 2.01245 |



|                            |          |                                                                                       |         |   |       |          |       |          |         |
|----------------------------|----------|---------------------------------------------------------------------------------------|---------|---|-------|----------|-------|----------|---------|
| DKPLTPNSLVPLEYEPEDK        | Mf       | MIP06926p (Myofilin, isoform A) (Myofilin, isoform G) (Myofilin, isoform N)           | 728.707 | 3 | 38.98 | 567161   | 38.81 | 728559   | 1.66871 |
| DTYGYSR                    | Mf       | MIP06926p (Myofilin, isoform A) (Myofilin, isoform G) (Myofilin, isoform N)           | 479.717 | 2 | 14.86 | 2640775  | 14.83 | 2840777  | 1.39742 |
| FWQSYIR                    | Mf       | MIP06926p (Myofilin, isoform A) (Myofilin, isoform G) (Myofilin, isoform N)           | 500.256 | 2 | 32.37 | 739255   | 32.25 | 1687659  | 2.9656  |
| LLAELNK                    | Mf       | MIP06926p (Myofilin, isoform A) (Myofilin, isoform G) (Myofilin, isoform N)           | 400.747 | 2 | 22.38 | 846200   | 22.35 | 1253332  | 1.92405 |
| NHLEMIGR                   | Mf       | MIP06926p (Myofilin, isoform A) (Myofilin, isoform G) (Myofilin, isoform N)           | 493.248 | 2 | 12.87 | 1554021  | 12.91 | 1080925  | 0.90357 |
| SIYDEPATANER               | Mf       | MIP06926p (Myofilin, isoform A) (Myofilin, isoform G) (Myofilin, isoform N)           | 683.318 | 2 | 18.42 | 9216683  | 18.42 | 15046478 | 2.12072 |
| YGLYLR                     | Mf       | MIP06926p (Myofilin, isoform A) (Myofilin, isoform G) (Myofilin, isoform N)           | 392.721 | 2 | 28.26 | 5499678  | 28.16 | 8903475  | 2.10303 |
| AGSEPYVPPPSYWNR            | Mf       | Mf5 protein (Myofilin, isoform B) (RE24409p)                                          | 860.41  | 2 | 33.23 | 748487   | 33.06 | 1566838  | 2.71933 |
| AIYDHHYSR                  | Mf       | Mf5 protein (Myofilin, isoform B) (RE24409p)                                          | 581.275 | 2 | 11.31 | 475566   | 11.41 | 651391   | 1.77932 |
| AIYDHHYSR                  | Mf       | Mf5 protein (Myofilin, isoform B) (RE24409p)                                          | 387.853 | 3 | 11.31 | 2895978  | 11.41 | 4746762  | 2.12924 |
| ASRPYSSYLDSPSYR            | Mf       | Mf5 protein (Myofilin, isoform B) (RE24409p)                                          | 874.916 | 2 | 25.08 | 1194562  | 25.03 | 1397150  | 1.51935 |
| ASRPYSSYLDSPSYR            | Mf       | Mf5 protein (Myofilin, isoform B) (RE24409p)                                          | 583.613 | 3 | 25.12 | 5487893  | 25.03 | 8501748  | 2.01245 |
| ASSLEPLDELFER              | Mf       | Mf5 protein (Myofilin, isoform B) (RE24409p)                                          | 753.378 | 2 | 48.45 | 4498040  | 48.19 | 5102070  | 1.47348 |
| DKPLTPNSLVPLEYEPEDK        | Mf       | Mf5 protein (Myofilin, isoform B) (RE24409p)                                          | 728.707 | 3 | 38.98 | 567161   | 38.81 | 728559   | 1.66871 |
| DSYLSVPK                   | Mf       | Mf5 protein (Myofilin, isoform B) (RE24409p)                                          | 454.74  | 2 | 22.04 | 1523720  | 22.02 | 1430945  | 1.21994 |
| DTYGYSR                    | Mf       | Mf5 protein (Myofilin, isoform B) (RE24409p)                                          | 479.717 | 2 | 14.86 | 2640775  | 14.83 | 2840777  | 1.39742 |
| FWQSYIR                    | Mf       | Mf5 protein (Myofilin, isoform B) (RE24409p)                                          | 500.256 | 2 | 32.37 | 739255   | 32.25 | 1687659  | 2.9656  |
| GGPSVFD                    | Mf       | Mf5 protein (Myofilin, isoform B) (RE24409p)                                          | 417.709 | 2 | 19.86 | 5727839  | 19.85 | 7157511  | 1.62328 |
| LLAELNK                    | Mf       | Mf5 protein (Myofilin, isoform B) (RE24409p)                                          | 400.747 | 2 | 22.38 | 846200   | 22.35 | 1253332  | 1.92405 |
| NHLEMIGR                   | Mf       | Mf5 protein (Myofilin, isoform B) (RE24409p)                                          | 493.248 | 2 | 12.87 | 1554021  | 12.91 | 1080925  | 0.90357 |
| SASPFRRPAR                 | Mf       | Mf5 protein (Myofilin, isoform B) (RE24409p)                                          | 494.77  | 2 | 13.46 | 1272464  | 13.42 | 1443660  | 1.47381 |
| SIYDEPATANER               | Mf       | Mf5 protein (Myofilin, isoform B) (RE24409p)                                          | 683.318 | 2 | 18.42 | 9216683  | 18.42 | 15046478 | 2.12072 |
| WGRPRTEVAYDAEGLPIFHPR      | Mf       | Mf5 protein (Myofilin, isoform B) (RE24409p)                                          | 602.809 | 4 | 43.06 | 371242   | 42.9  | 651591   | 2.28003 |
| YGLYLR                     | Mf       | Mf5 protein (Myofilin, isoform B) (RE24409p)                                          | 392.721 | 2 | 28.26 | 5499678  | 28.16 | 8903475  | 2.10303 |
| GVTYDTGGADIK               | Dip-B    | Dipeptidase B, isoform A (Dipeptidase B, isoform B) (Dipeptidase B, isoform C)        | 598.793 | 2 | 18.83 | 55238    | 18.98 | 102822   | 2.41808 |
| FFGAGFGGGGGGR              | Droj2    | DnaJ-like-2, isoform A (DnaJ-like-2, isoform B) (DnaJ-like-2, isoform C) (DnaJ        | 587.275 | 2 | 30.15 | 714105   | 30.2  | 935327   | 1.70147 |
| LLEANPNYSK                 | mfas     | GH11519p (Midline fasciclin, isoform B) (Midline fasciclin, isoform D) (Midline       | 574.801 | 2 | 18.6  | 422357   | 18.57 | 399268   | 1.22802 |
| LNLYSTHALFSDVMNR           | mfas     | GH11519p (Midline fasciclin, isoform B) (Midline fasciclin, isoform D) (Midline       | 632.981 | 3 | 38.73 | 372398   | 38.45 | 772695   | 2.6954  |
| LLEANPNYSK                 | mfas     | Midline fasciclin, isoform C (Midline fasciclin, isoform I) (Midline fasciclin, isofc | 574.801 | 2 | 18.6  | 422357   | 18.57 | 399268   | 1.22802 |
| LNLYSTHALFSDVMNR           | mfas     | Midline fasciclin, isoform C (Midline fasciclin, isoform I) (Midline fasciclin, isofc | 632.981 | 3 | 38.73 | 372398   | 38.45 | 772695   | 2.6954  |
| GSGVNILLITPEK              | GC1      | Glutamate carrier 1, isoform A (Glutamate carrier 1, isoform B) (SD15982p)            | 670.893 | 2 | 40.94 | 753169   | 40.74 | 667861   | 1.1519  |
| VADFQIDR                   | mRpl40   | Mitochondrial ribosomal protein L40 (RE65766p)                                        | 538.79  | 2 | 31.75 | 1471897  | 31.63 | 1067453  | 0.94209 |
| AAAPAAAPAPAAPK             | alpha-KG | GM01350p (LP03989p)                                                                   | 587.833 | 2 | 15.61 | 635681   | 15.6  | 267047   | 0.54572 |
| AAVENPAIIVAGL              | alpha-KG | GM01350p (LP03989p)                                                                   | 619.361 | 2 | 50.09 | 768844   | 49.84 | 619275   | 1.04633 |
| EAVLFLR                    | alpha-KG | GM01350p (LP03989p)                                                                   | 424.255 | 2 | 36.05 | 962959   | 35.86 | 525379   | 0.70874 |
| AAIELNR                    | DHC3B    | Uncharacterized protein, isoform E (EC 3.6.1.3) (EC 3.6.4.5)                          | 393.727 | 2 | 17.87 | 27934492 | 17.87 | 8147882  | 0.3789  |
| ACHDSGEELDDISLPK           | MBD-like | LD22928p (Methyl-CpG binding domain protein-like, isoform A)                          | 893.402 | 2 | 30.72 | 859129   | 30.56 | 663495   | 1.00323 |
| ACHDSGEELDDISLPK           | MBD-like | LD22928p (Methyl-CpG binding domain protein-like, isoform A)                          | 595.937 | 3 | 30.68 | 4227121  | 30.52 | 3334801  | 1.02482 |
| TDVSLVPIR                  | MBD-like | LD22928p (Methyl-CpG binding domain protein-like, isoform A)                          | 548.822 | 2 | 35.16 | 14387869 | 35.02 | 9195601  | 0.83024 |
| TVGPNVNEQTVLQSVATALHMLNA   | MBD-like | LD22928p (Methyl-CpG binding domain protein-like, isoform A)                          | 847.937 | 4 | 61.34 | 1644970  | 61.29 | 1228563  | 0.9702  |
| TVGPNVNEQTVLQSVATALHMLNA   | MBD-like | LD22928p (Methyl-CpG binding domain protein-like, isoform A)                          | 851.936 | 4 | 55.74 | 1113659  | 55.85 | 795373   | 0.92777 |
| TVIIPSDVQVSTK              | CG16779  | Uncharacterized protein, isoform A (Uncharacterized protein, isoform B) (Uncl         | 743.43  | 2 | 34.9  | 984275   | 34.74 | 541335   | 0.71445 |
| VVYDPQTAELSSK              | ScsbetaA | Succinate--CoA ligase [ADP-forming] subunit beta, mitochondrial (EC 6.2.1.5)          | 783.388 | 2 | 26.05 | 1092441  | 25.98 | 763625   | 0.90804 |
| HNILTVFPNR                 | CG10237  | LD41874p                                                                              | 404.228 | 3 | 27.09 | 502708   | 26.54 | 832902   | 2.15229 |
| LLEAETDLLYPK               | CG10237  | LD41874p                                                                              | 702.885 | 2 | 39.58 | 82213    | 39.35 | 456931   | 7.21992 |
| LVLIASNTPALR               | Rpl30    | RE25263p (Ribosomal protein L30, isoform B) (Ribosomal protein L30, isoform           | 634.39  | 2 | 36.53 | 13305670 | 36.36 | 9153605  | 0.89367 |
| TEVQHSYGTNIELGTACGK        | Rpl30    | RE25263p (Ribosomal protein L30, isoform B) (Ribosomal protein L30, isoform           | 688.993 | 3 | 23.73 | 1580231  | 23.72 | 1103695  | 0.9073  |
| VCLTSITDPGSDIIR            | Rpl30    | RE25263p (Ribosomal protein L30, isoform B) (Ribosomal protein L30, isoform           | 881.438 | 2 | 37.12 | 7196177  | 36.91 | 5238982  | 0.94573 |
| YCTLGYK                    | Rpl30    | RE25263p (Ribosomal protein L30, isoform B) (Ribosomal protein L30, isoform           | 402.191 | 2 | 19.17 | 631184   | 19.17 | 219376   | 0.4515  |
| INDTLYDLSDFAR              | CG17928  | IP12339p                                                                              | 807.394 | 2 | 43.06 | 30666    | 45.24 | 52905    | 2.2411  |
| AFADALEVIPSTLAENAGLNPIATVT | CCT4     | T-complex protein 1 subunit delta                                                     | 999.536 | 3 | 65.21 | 795472   | 65    | 511753   | 0.83571 |
| AATQEIAANVLR               | Dlg5     | Discs large 5, isoform A (Discs large 5, isoform B) (LD32687p)                        | 628.852 | 2 | 39.24 | 4025067  | 39.04 | 5041733  | 1.62716 |
| SWYTVMGAGAR                | CG6089   | AT01533p                                                                              | 607.785 | 2 | 25.16 | 570186   | 25.18 | 436913   | 0.99541 |

|                            |           |                                                                             |  |         |   |       |          |       |          |         |
|----------------------------|-----------|-----------------------------------------------------------------------------|--|---------|---|-------|----------|-------|----------|---------|
| SWYTVMGAGAR                | CG6087    | RH51633p                                                                    |  | 607.785 | 2 | 25.16 | 570186   | 25.18 | 436913   | 0.99541 |
| DAQIQNVQEGIELGAYEQIPGNQR   | CG17127   | Uncharacterized protein, isoform A (Uncharacterized protein, isoform B)     |  | 890.775 | 3 | 39.99 | 5948109  | 39.77 | 10842609 | 2.36798 |
| EGAAYTNEAIR                | CG17127   | Uncharacterized protein, isoform A (Uncharacterized protein, isoform B)     |  | 597.791 | 2 | 17.24 | 14578124 | 17.25 | 20886826 | 1.8612  |
| QAQQTLLIPK                 | CG17127   | Uncharacterized protein, isoform A (Uncharacterized protein, isoform B)     |  | 570.343 | 2 | 27.84 | 8634126  | 27.76 | 16636826 | 2.50308 |
| AGTVVWNTYVNLAAQAPFGGYK     | Aldh      | Aldehyde dehydrogenase (Aldehyde dehydrogenase, isoform A) (EC 1.2.1.10)    |  | 776.399 | 3 | 50.78 | 476997   | 50.55 | 100631   | 0.27406 |
| ANNSEYGLAAAVFTK            | Aldh      | Aldehyde dehydrogenase (Aldehyde dehydrogenase, isoform A) (EC 1.2.1.10)    |  | 778.391 | 2 | 38.76 | 362378   | 38.5  | 599018   | 2.14734 |
| ANYIVGGLR                  | Aldh      | Aldehyde dehydrogenase (Aldehyde dehydrogenase, isoform A) (EC 1.2.1.10)    |  | 481.775 | 2 | 27.31 | 644317   | 27.19 | 494411   | 0.99681 |
| IYDEFVER                   | Aldh      | Aldehyde dehydrogenase (Aldehyde dehydrogenase, isoform A) (EC 1.2.1.10)    |  | 535.761 | 2 | 26.32 | 269648   | 25.84 | 0        | 0       |
| LIQLASGNTNLK               | Aldh      | Aldehyde dehydrogenase (Aldehyde dehydrogenase, isoform A) (EC 1.2.1.10)    |  | 636.37  | 2 | 28.18 | 729317   | 28.09 | 380954   | 0.67854 |
| VSVNDFIK                   | muc       | AT21758p (Midline uncoordinated, isoform B) (EC 2.3.1.12) (Midline uncoordi |  | 517.798 | 2 | 38.03 | 442234   | 37.88 | 706401   | 2.07502 |
| VVDGAVAAR                  | muc       | AT21758p (Midline uncoordinated, isoform B) (EC 2.3.1.12) (Midline uncoordi |  | 429.246 | 2 | 12.17 | 236652   | 12.23 | 154993   | 0.85079 |
| YEDIPVTNMR                 | muc       | AT21758p (Midline uncoordinated, isoform B) (EC 2.3.1.12) (Midline uncoordi |  | 627.295 | 2 | 20.92 | 490136   | 20.93 | 697704   | 1.84917 |
| CALMAR                     | rtp       | MORN repeat-containing protein 4 homolog (Retinophilin) (undertaker)        |  | 361.178 | 2 | 14.53 | 575465   | 14.6  | 264197   | 0.59639 |
| CPEVQR                     | rtp       | MORN repeat-containing protein 4 homolog (Retinophilin) (undertaker)        |  | 444.224 | 2 | 11.3  | 1459432  | 11.41 | 416922   | 0.3711  |
| HGIGHLQFADGTR              | rtp       | MORN repeat-containing protein 4 homolog (Retinophilin) (undertaker)        |  | 470.241 | 3 | 21.24 | 17467458 | 21.2  | 4610221  | 0.34286 |
| IWGLGLLTQDFTHGFPR          | rtp       | MORN repeat-containing protein 4 homolog (Retinophilin) (undertaker)        |  | 702.37  | 3 | 62.01 | 229368   | 60.93 | 2241547  | 12.6951 |
| NEGFFQDCR                  | rtp       | MORN repeat-containing protein 4 homolog (Retinophilin) (undertaker)        |  | 586.743 | 2 | 24.15 | 21363690 | 24.2  | 9108685  | 0.55386 |
| SQCEHPY                    | rtp       | MORN repeat-containing protein 4 homolog (Retinophilin) (undertaker)        |  | 460.682 | 2 | 10.09 | 3548788  | 10.22 | 1264609  | 0.46291 |
| YEGEFR                     | rtp       | MORN repeat-containing protein 4 homolog (Retinophilin) (undertaker)        |  | 400.682 | 2 | 13.99 | 438716   | 14.08 | 69103    | 0.20461 |
| YIGEWNQR                   | rtp       | MORN repeat-containing protein 4 homolog (Retinophilin) (undertaker)        |  | 533.259 | 2 | 22.21 | 23276284 | 22.21 | 14982978 | 0.83619 |
| SGPNPIAEEAIK               | CG2931    | RE50009p                                                                    |  | 613.325 | 2 | 25.08 | 260764   | 24.98 | 259468   | 1.29258 |
| DITLFHAMNILHK              | MTA1-like | Metastasis associated 1-like, isoform A                                     |  | 518.282 | 3 | 43.88 | 2053379  | 43.78 | 955106   | 0.60423 |
| DLPNPLVQLADK               | MTA1-like | Metastasis associated 1-like, isoform A                                     |  | 661.869 | 2 | 44.73 | 4867516  | 44.55 | 2835007  | 0.7566  |
| ELTIPTQATSTIR              | MTA1-like | Metastasis associated 1-like, isoform A                                     |  | 772.438 | 2 | 37.83 | 11123584 | 37.63 | 12065403 | 1.40903 |
| HYAQAHGIAISSGSPRPIMK       | MTA1-like | Metastasis associated 1-like, isoform A                                     |  | 531.031 | 4 | 22.34 | 2400440  | 22.14 | 3061997  | 1.65705 |
| HYAQAHGIAISSGSPRPIMK       | MTA1-like | Metastasis associated 1-like, isoform A                                     |  | 713.037 | 3 | 18.86 | 1475021  | 18.76 | 1372104  | 1.2084  |
| HYAQAHGIAISSGSPRPIMK       | MTA1-like | Metastasis associated 1-like, isoform A                                     |  | 535.03  | 4 | 18.86 | 8277828  | 18.73 | 11433715 | 1.79429 |
| IDQFLVVSRR                 | MTA1-like | Metastasis associated 1-like, isoform A                                     |  | 538.809 | 2 | 33.15 | 2031489  | 33.09 | 2200379  | 1.40704 |
| ILSAVDLR                   | MTA1-like | Metastasis associated 1-like, isoform A                                     |  | 443.771 | 2 | 29.06 | 3480815  | 28.94 | 3278001  | 1.22335 |
| LCLSCWEYWR                 | MTA1-like | Metastasis associated 1-like, isoform A                                     |  | 736.826 | 2 | 45.03 | 1100791  | 44.85 | 1003854  | 1.18464 |
| LGAPGSGPHEWLVLTpk          | MTA1-like | Metastasis associated 1-like, isoform A                                     |  | 586.989 | 3 | 38.45 | 4162383  | 38.27 | 5011628  | 1.56408 |
| LLLLPK                     | MTA1-like | Metastasis associated 1-like, isoform A                                     |  | 412.802 | 2 | 25.48 | 7404797  | 25.43 | 7870932  | 1.38081 |
| QIIYYYYMWK                 | MTA1-like | Metastasis associated 1-like, isoform A                                     |  | 718.85  | 2 | 43.1  | 621851   | 42.87 | 464183   | 0.96967 |
| QPSLHMSAAAASR              | MTA1-like | Metastasis associated 1-like, isoform A                                     |  | 448.223 | 3 | 11.24 | 631709   | 11.36 | 455066   | 0.93579 |
| QSAYAINAMLVK               | MTA1-like | Metastasis associated 1-like, isoform A                                     |  | 654.853 | 2 | 35.58 | 1490566  | 35.41 | 2100155  | 1.8303  |
| QSAYAINAMLVK               | MTA1-like | Metastasis associated 1-like, isoform A                                     |  | 662.85  | 2 | 29.32 | 5849027  | 29.21 | 6763609  | 1.50216 |
| QVESIPATQIR                | MTA1-like | Metastasis associated 1-like, isoform A                                     |  | 621.346 | 2 | 23.95 | 29583954 | 23.96 | 39601180 | 1.7389  |
| SIGTFAR                    | MTA1-like | Metastasis associated 1-like, isoform A                                     |  | 376.208 | 2 | 18.93 | 21987752 | 18.88 | 27082934 | 1.60006 |
| SSQWNSVSSGHSTSR            | MTA1-like | Metastasis associated 1-like, isoform A                                     |  | 536.245 | 3 | 13.07 | 1701975  | 13.07 | 2157652  | 1.64684 |
| SSSAASTPTATLAGLATTPTAVVDLI | MTA1-like | Metastasis associated 1-like, isoform A                                     |  | 968.816 | 3 | 46.62 | 1694407  | 46.37 | 1458500  | 1.11818 |
| TAFYLHTNPMTR               | MTA1-like | Metastasis associated 1-like, isoform A                                     |  | 726.359 | 2 | 28.65 | 3357775  | 28.53 | 4332503  | 1.67614 |
| TAFYLHTNPMTR               | MTA1-like | Metastasis associated 1-like, isoform A                                     |  | 484.575 | 3 | 28.65 | 6289877  | 28.53 | 6959267  | 1.43729 |
| TAFYLHTNPMTR               | MTA1-like | Metastasis associated 1-like, isoform A                                     |  | 734.356 | 2 | 22.69 | 3508484  | 22.72 | 3475736  | 1.28691 |
| TAFYLHTNPMTR               | MTA1-like | Metastasis associated 1-like, isoform A                                     |  | 489.906 | 3 | 22.69 | 11884596 | 22.72 | 15231011 | 1.66482 |
| TLPIKPAPEPSSRPISQVILD      | MTA1-like | Metastasis associated 1-like, isoform A                                     |  | 857.818 | 3 | 41.39 | 34286420 | 41.22 | 42519524 | 1.61097 |
| TPVSEEQAAQAVLDPSIAALDEER   | MTA1-like | Metastasis associated 1-like, isoform A                                     |  | 847.089 | 3 | 45.9  | 2579368  | 45.66 | 1415875  | 0.71307 |
| VGDYVYVETTPNSPYLIR         | MTA1-like | Metastasis associated 1-like, isoform A                                     |  | 1043.53 | 2 | 39.99 | 19490416 | 39.8  | 21930646 | 1.46168 |
| VGDYVYVETTPNSPYLIR         | MTA1-like | Metastasis associated 1-like, isoform A                                     |  | 696.021 | 3 | 39.99 | 8430076  | 39.8  | 9468280  | 1.45902 |
| VMCFYR                     | MTA1-like | Metastasis associated 1-like, isoform A                                     |  | 446.196 | 2 | 18.26 | 2536584  | 18.3  | 3037729  | 1.55569 |
| YQCDIPAK                   | MTA1-like | Metastasis associated 1-like, isoform A                                     |  | 497.737 | 2 | 14.9  | 10434692 | 14.9  | 5215218  | 0.64925 |
| DITLFHAMNILHK              | MTA1-like | Metastasis associated 1-like, isoform B                                     |  | 518.282 | 3 | 43.88 | 2053379  | 43.78 | 955106   | 0.60423 |
| DLPNPLVQLADK               | MTA1-like | Metastasis associated 1-like, isoform B                                     |  | 661.869 | 2 | 44.73 | 4867516  | 44.55 | 2835007  | 0.7566  |
| ELTIPTQATSTIR              | MTA1-like | Metastasis associated 1-like, isoform B                                     |  | 772.438 | 2 | 37.83 | 11123584 | 37.63 | 12065403 | 1.40903 |

|                            |                                                                                      |         |   |       |          |       |          |         |
|----------------------------|--------------------------------------------------------------------------------------|---------|---|-------|----------|-------|----------|---------|
| HQPALDEER                  | MTA1-like Metastasis associated 1-like, isoform B                                    | 547.765 | 2 | 10.77 | 1401862  | 10.88 | 390542   | 0.3619  |
| HYAQAHGIAISSGSPRPIMK       | MTA1-like Metastasis associated 1-like, isoform B                                    | 531.031 | 4 | 22.34 | 2400440  | 22.14 | 3061997  | 1.65705 |
| HYAQAHGIAISSGSPRPIMK       | MTA1-like Metastasis associated 1-like, isoform B                                    | 713.037 | 3 | 18.86 | 1475021  | 18.76 | 1372104  | 1.2084  |
| HYAQAHGIAISSGSPRPIMK       | MTA1-like Metastasis associated 1-like, isoform B                                    | 535.03  | 4 | 18.86 | 8277828  | 18.73 | 11433715 | 1.79429 |
| IDQFLVVS                   | MTA1-like Metastasis associated 1-like, isoform B                                    | 538.809 | 2 | 33.15 | 2031489  | 33.09 | 2200379  | 1.40704 |
| ILSAVDLR                   | MTA1-like Metastasis associated 1-like, isoform B                                    | 443.771 | 2 | 29.06 | 3480815  | 28.94 | 3278001  | 1.22335 |
| LCLSCWEYWR                 | MTA1-like Metastasis associated 1-like, isoform B                                    | 736.826 | 2 | 45.03 | 1100791  | 44.85 | 1003854  | 1.18464 |
| LGAPGSGPHEWLVLT            | MTA1-like Metastasis associated 1-like, isoform B                                    | 586.989 | 3 | 38.45 | 4162383  | 38.27 | 5011628  | 1.56408 |
| LLLLKPK                    | MTA1-like Metastasis associated 1-like, isoform B                                    | 412.802 | 2 | 25.48 | 7404797  | 25.43 | 7870932  | 1.38081 |
| QIIEYYMWK                  | MTA1-like Metastasis associated 1-like, isoform B                                    | 718.85  | 2 | 43.1  | 621851   | 42.87 | 464183   | 0.96967 |
| QPSLHMSAAAASR              | MTA1-like Metastasis associated 1-like, isoform B                                    | 448.223 | 3 | 11.24 | 631709   | 11.36 | 455066   | 0.93579 |
| QSAYAINAMLVK               | MTA1-like Metastasis associated 1-like, isoform B                                    | 654.853 | 2 | 35.58 | 1490566  | 35.41 | 2100155  | 1.8303  |
| QSAYAINAMLVK               | MTA1-like Metastasis associated 1-like, isoform B                                    | 662.85  | 2 | 29.32 | 5849027  | 29.21 | 6763609  | 1.50216 |
| QVESIPATQIR                | MTA1-like Metastasis associated 1-like, isoform B                                    | 621.346 | 2 | 23.95 | 29583954 | 23.96 | 39601180 | 1.7389  |
| SIGTFAR                    | MTA1-like Metastasis associated 1-like, isoform B                                    | 376.208 | 2 | 18.93 | 21987752 | 18.88 | 27082934 | 1.60006 |
| SSQWNSVSSGHSTSR            | MTA1-like Metastasis associated 1-like, isoform B                                    | 536.245 | 3 | 13.07 | 1701975  | 13.07 | 2157652  | 1.64684 |
| SSSAASTPTATLAGLATTPTAVVDLI | MTA1-like Metastasis associated 1-like, isoform B                                    | 968.816 | 3 | 46.62 | 1694407  | 46.37 | 1458500  | 1.11818 |
| TAFYLHTNPMTR               | MTA1-like Metastasis associated 1-like, isoform B                                    | 726.359 | 2 | 28.65 | 3357775  | 28.53 | 4332503  | 1.67614 |
| TAFYLHTNPMTR               | MTA1-like Metastasis associated 1-like, isoform B                                    | 484.575 | 3 | 28.65 | 6289877  | 28.53 | 6959267  | 1.43729 |
| TAFYLHTNPMTR               | MTA1-like Metastasis associated 1-like, isoform B                                    | 734.356 | 2 | 22.69 | 3508484  | 22.72 | 3475736  | 1.28691 |
| TAFYLHTNPMTR               | MTA1-like Metastasis associated 1-like, isoform B                                    | 489.906 | 3 | 22.69 | 11884596 | 22.72 | 15231011 | 1.66482 |
| TLPIKPAPEPSSRPIESQIVILD    | MTA1-like Metastasis associated 1-like, isoform B                                    | 857.818 | 3 | 41.39 | 34286420 | 41.22 | 42519524 | 1.61097 |
| VG DYVYVETTPNSPYLIR        | MTA1-like Metastasis associated 1-like, isoform B                                    | 1043.53 | 2 | 39.99 | 19490416 | 39.8  | 21930646 | 1.46168 |
| VG DYVYVETTPNSPYLIR        | MTA1-like Metastasis associated 1-like, isoform B                                    | 696.021 | 3 | 39.99 | 8430076  | 39.8  | 9468280  | 1.45902 |
| VMCFYR                     | MTA1-like Metastasis associated 1-like, isoform B                                    | 446.196 | 2 | 18.26 | 2536584  | 18.3  | 3037729  | 1.55569 |
| YQCDIPAK                   | MTA1-like Metastasis associated 1-like, isoform B                                    | 497.737 | 2 | 14.9  | 10434692 | 14.9  | 5215218  | 0.64925 |
| ASAVNTLADLLVSR             | CG7470 Delta-1-pyrroline-5-carboxylate synthase [Includes: Glutamate 5-kinase (GK) ] | 715.404 | 2 | 49.47 | 2562427  | 49.2  | 1828687  | 0.92707 |
| FGLGAEVGISTAR              | CG7470 Delta-1-pyrroline-5-carboxylate synthase [Includes: Glutamate 5-kinase (GK) ] | 639.346 | 2 | 34.41 | 2134752  | 34.23 | 1487748  | 0.90532 |
| GPVGVGELLTTK               | CG7470 Delta-1-pyrroline-5-carboxylate synthase [Includes: Glutamate 5-kinase (GK) ] | 585.84  | 2 | 35.73 | 1330746  | 35.54 | 933874   | 0.91162 |
| LASIVEQVAECHLEGR           | CG7470 Delta-1-pyrroline-5-carboxylate synthase [Includes: Glutamate 5-kinase (GK) ] | 604.309 | 3 | 37.17 | 750377   | 37.14 | 243617   | 0.42175 |
| LNQLTFGPPAAK               | CG7470 Delta-1-pyrroline-5-carboxylate synthase [Includes: Glutamate 5-kinase (GK) ] | 692.883 | 2 | 29.99 | 1289638  | 29.81 | 1025810  | 1.03329 |
| LSLNPAK                    | CG7470 Delta-1-pyrroline-5-carboxylate synthase [Includes: Glutamate 5-kinase (GK) ] | 371.727 | 2 | 19.02 | 496459   | 19.02 | 288630   | 0.75523 |
| HFEVHQSPSASTVSPK           | pzg LD15904p (Putzig, isoform A) (Putzig, isoform B)                                 | 579.957 | 3 | 16.11 | 209908   | 16.02 | 226656   | 1.40269 |
| GYDYPQLESYQR               | mRpL48 Mitochondrial ribosomal protein L48, isoform A (Mitochondrial ribosomal prote | 759.847 | 2 | 28.57 | 975481   | 28.48 | 964360   | 1.28423 |
| NLQLNVDAPVYPQFLR           | mRpL48 Mitochondrial ribosomal protein L48, isoform A (Mitochondrial ribosomal prote | 1001.03 | 2 | 45.83 | 870044   | 45.59 | 811963   | 1.21232 |
| LALVGGIFNLA AVL R          | FASN2 Fatty acid synthase 2, isoform A (EC 1.-.-.) (EC 2.3.1.85) (EC 3.1.-.-) (GH222 | 763.974 | 2 | 64.23 | 79694    | 63.78 | 0        | 0       |
| DTSFEQLVLR                 | FASN1 Fatty acid synthase 1, isoform A (EC 1.-.-.) (EC 2.3.1.85) (EC 3.1.-.-)        | 604.32  | 2 | 40.82 | 404038   | 40.66 | 103733   | 0.33352 |
| LALVGGIFNLA AVL R          | FASN1 Fatty acid synthase 1, isoform A (EC 1.-.-.) (EC 2.3.1.85) (EC 3.1.-.-)        | 763.974 | 2 | 64.23 | 79694    | 63.78 | 0        | 0       |
| NFDIVLSAQEIR               | FASN1 Fatty acid synthase 1, isoform A (EC 1.-.-.) (EC 2.3.1.85) (EC 3.1.-.-)        | 702.878 | 2 | 41.81 | 372388   | 41.64 | 404923   | 1.41253 |
| YAATPFAAPIAAPVAAAYTAPIAAAA | CG13674 Uncharacterized protein, isoform A (Uncharacterized protein, isoform B)      | 984.891 | 3 | 60.84 | 1512020  | 60.6  | 1459350  | 1.25379 |
| GQYSLVEPDGSIR              | Cpr66Cb Cuticular protein 66Cb (GEO11540p1) (IP05056p)                               | 710.857 | 2 | 29.1  | 764886   | 29.02 | 975676   | 1.65703 |
| AASPASSVSSLSR              | Gug Grunge, isoform H (EC 3.5.1.98)                                                  | 610.317 | 2 | 19.87 | 670193   | 19.91 | 1047675  | 2.03072 |
| ALQALVK                    | Gug Grunge, isoform H (EC 3.5.1.98)                                                  | 371.745 | 2 | 22.24 | 1429410  | 22.24 | 802676   | 0.72947 |
| ASPSVQISSSGGGPSGPGSVGPGC   | Gug Grunge, isoform H (EC 3.5.1.98)                                                  | 862.663 | 4 | 27.81 | 128265   | 27.69 | 91817    | 0.9299  |
| MSYADQLQAAEFQR             | Gug Grunge, isoform H (EC 3.5.1.98)                                                  | 829.386 | 2 | 32.37 | 172984   | 32.33 | 256318   | 1.92484 |
| MYAPQPGQR                  | Gug Grunge, isoform H (EC 3.5.1.98)                                                  | 532.253 | 2 | 11.22 | 597570   | 11.23 | 396368   | 0.86165 |
| QHQAIAAAAAAQHK             | Gug Grunge, isoform H (EC 3.5.1.98)                                                  | 477.58  | 3 | 7.39  | 102108   | 7.46  | 61942    | 0.78804 |
| QSLHDQYFR                  | Gug Grunge, isoform H (EC 3.5.1.98)                                                  | 398.528 | 3 | 18.86 | 599467   | 18.89 | 746793   | 1.61829 |
| QSIAIFVR                   | Gug Grunge, isoform H (EC 3.5.1.98)                                                  | 454.253 | 2 | 22.57 | 2827859  | 22.59 | 2397174  | 1.10119 |
| WSPGVVADGDLMLFLR           | Gug Grunge, isoform H (EC 3.5.1.98)                                                  | 888.461 | 2 | 59.21 | 701351   | 58.95 | 433086   | 0.80216 |
| WSPGVVADGDLMLFLR           | Gug Grunge, isoform H (EC 3.5.1.98)                                                  | 896.459 | 2 | 56.45 | 1934292  | 56.29 | 935150   | 0.62803 |
| YGDPLAAK                   | Gug Grunge, isoform H (EC 3.5.1.98)                                                  | 417.721 | 2 | 19.02 | 1065996  | 19    | 938830   | 1.14407 |
| AELDDNEDVGPR               | CG32352 Uncharacterized protein, isoform B                                           | 665.299 | 2 | 17.49 | 854844   | 17.49 | 358372   | 0.54459 |

|                           |                                                                                                                                               |         |   |       |         |       |          |         |
|---------------------------|-----------------------------------------------------------------------------------------------------------------------------------------------|---------|---|-------|---------|-------|----------|---------|
| AGTNDTDPVIEVEPAGVR        | CG32352 Uncharacterized protein, isoform B                                                                                                    | 920.458 | 2 | 31.26 | 799045  | 31.12 | 994850   | 1.61737 |
| ELTPFEQELQR               | CG32352 Uncharacterized protein, isoform B                                                                                                    | 695.354 | 2 | 34.45 | 1822534 | 34.23 | 951564   | 0.67824 |
| FATLPSIR                  | CG32352 Uncharacterized protein, isoform B                                                                                                    | 452.766 | 2 | 32.1  | 2652917 | 31.93 | 2934962  | 1.43715 |
| FHDLQDAQSTASSGK           | CG32352 Uncharacterized protein, isoform B                                                                                                    | 531.25  | 3 | 15.41 | 391086  | 15.36 | 283768   | 0.94257 |
| GADSLILDGHIK              | CG32352 Uncharacterized protein, isoform B                                                                                                    | 413.563 | 3 | 29.68 | 1264479 | 29.53 | 1469523  | 1.50969 |
| GFMASAQDR                 | CG32352 Uncharacterized protein, isoform B                                                                                                    | 499.722 | 2 | 11.62 | 285875  | 11.75 | 165984   | 0.75424 |
| GISEDNIQLR                | CG32352 Uncharacterized protein, isoform B                                                                                                    | 572.801 | 2 | 25.08 | 2302903 | 24.99 | 2379743  | 1.34238 |
| NYQPFDSDQEFQR             | CG32352 Uncharacterized protein, isoform B                                                                                                    | 837.363 | 2 | 28.43 | 615106  | 28.34 | 745801   | 1.57505 |
| RPLGPDEQPEIVLLLR          | CG32352 Uncharacterized protein, isoform B                                                                                                    | 615.691 | 3 | 45.58 | 1022269 | 45.43 | 642182   | 0.81605 |
| SVSNTFLQPHEDVIVYR         | CG32352 Uncharacterized protein, isoform B                                                                                                    | 668.678 | 3 | 35.81 | 2074033 | 35.7  | 1364163  | 0.85442 |
| TDYEIHTSQVDSSALEELPLQPENR | CG32352 Uncharacterized protein, isoform B                                                                                                    | 957.793 | 3 | 39.43 | 686104  | 39.2  | 452230   | 0.85623 |
| THEDAQSLPGNSANPSR         | CG32352 Uncharacterized protein, isoform B                                                                                                    | 594.278 | 3 | 13.23 | 675781  | 13.53 | 14072906 | 27.052  |
| AELDDNEDVGPR              | CG32355 F119449p1                                                                                                                             | 665.299 | 2 | 17.49 | 854844  | 17.49 | 358372   | 0.54459 |
| AGTNDTDPVIEVEPAGVR        | CG32355 F119449p1                                                                                                                             | 920.458 | 2 | 31.26 | 799045  | 31.12 | 994850   | 1.61737 |
| ELTPFEQELQR               | CG32355 F119449p1                                                                                                                             | 695.354 | 2 | 34.45 | 1822534 | 34.23 | 951564   | 0.67824 |
| FATLPSIR                  | CG32355 F119449p1                                                                                                                             | 452.766 | 2 | 32.1  | 2652917 | 31.93 | 2934962  | 1.43715 |
| FHDLQDAQSTASSGK           | CG32355 F119449p1                                                                                                                             | 531.25  | 3 | 15.41 | 391086  | 15.36 | 283768   | 0.94257 |
| GADSLILDGHIK              | CG32355 F119449p1                                                                                                                             | 413.563 | 3 | 29.68 | 1264479 | 29.53 | 1469523  | 1.50969 |
| GFMASAQDR                 | CG32355 F119449p1                                                                                                                             | 499.722 | 2 | 11.62 | 285875  | 11.75 | 165984   | 0.75424 |
| GISEDNIQLR                | CG32355 F119449p1                                                                                                                             | 572.801 | 2 | 25.08 | 2302903 | 24.99 | 2379743  | 1.34238 |
| NYQPFDSDQEFQR             | CG32355 F119449p1                                                                                                                             | 837.363 | 2 | 28.43 | 615106  | 28.34 | 745801   | 1.57505 |
| RPLGPDEQPEIVLLLR          | CG32355 F119449p1                                                                                                                             | 615.691 | 3 | 45.58 | 1022269 | 45.43 | 642182   | 0.81605 |
| SVSNTFLQPHEDVIVYR         | CG32355 F119449p1                                                                                                                             | 668.678 | 3 | 35.81 | 2074033 | 35.7  | 1364163  | 0.85442 |
| TDYEIHTSQVDSSALEELPLQPENR | CG32355 F119449p1                                                                                                                             | 957.793 | 3 | 39.43 | 686104  | 39.2  | 452230   | 0.85623 |
| THEDAQSLPGNSANPSR         | CG32355 F119449p1                                                                                                                             | 594.278 | 3 | 13.23 | 675781  | 13.53 | 14072906 | 27.052  |
| AELDDNEDVGPR              | CG17926 Uncharacterized protein, isoform C                                                                                                    | 665.299 | 2 | 17.49 | 854844  | 17.49 | 358372   | 0.54459 |
| FATLPSIR                  | CG17926 Uncharacterized protein, isoform C                                                                                                    | 452.766 | 2 | 32.1  | 2652917 | 31.93 | 2934962  | 1.43715 |
| FHDLQDAQSTASSGK           | CG17926 Uncharacterized protein, isoform C                                                                                                    | 531.25  | 3 | 15.41 | 391086  | 15.36 | 283768   | 0.94257 |
| GADSLILDGHIK              | CG17926 Uncharacterized protein, isoform C                                                                                                    | 413.563 | 3 | 29.68 | 1264479 | 29.53 | 1469523  | 1.50969 |
| GFMASAQDR                 | CG17926 Uncharacterized protein, isoform C                                                                                                    | 499.722 | 2 | 11.62 | 285875  | 11.75 | 165984   | 0.75424 |
| GISEDNIQLR                | CG17926 Uncharacterized protein, isoform C                                                                                                    | 572.801 | 2 | 25.08 | 2302903 | 24.99 | 2379743  | 1.34238 |
| NYQPFDSDQEFQR             | CG17926 Uncharacterized protein, isoform C                                                                                                    | 837.363 | 2 | 28.43 | 615106  | 28.34 | 745801   | 1.57505 |
| SVSNTFLQPHEDVIVYR         | CG17926 Uncharacterized protein, isoform C                                                                                                    | 668.678 | 3 | 35.81 | 2074033 | 35.7  | 1364163  | 0.85442 |
| TDYEIHTSQVDSSALEELPLQPENR | CG17926 Uncharacterized protein, isoform C                                                                                                    | 957.793 | 3 | 39.43 | 686104  | 39.2  | 452230   | 0.85623 |
| STVPFATSESNR              | Zasp66 HL08110p (Z band alternatively spliced PDZ-motif protein 66, isoform A) (Z band alternatively spliced PDZ-motif protein 66, isoform B) | 648.315 | 2 | 21.89 | 228788  | 21.86 | 230532   | 1.30894 |
| NAVQTVYWR                 | CG13315 GEO09635p1 (RH39779p)                                                                                                                 | 568.796 | 2 | 27.31 | 3597957 | 27.28 | 4850267  | 1.75118 |
| VNHLIGATTR                | CG13315 GEO09635p1 (RH39779p)                                                                                                                 | 541.309 | 2 | 14.79 | 1950017 | 14.75 | 2217894  | 1.47749 |
| VNHLIGATTR                | CG13315 GEO09635p1 (RH39779p)                                                                                                                 | 361.209 | 3 | 14.79 | 3569957 | 14.75 | 4473470  | 1.62781 |
| STSAIDTLR                 | mRRF1 F106490p (Mitochondrial ribosome recycling factor 1)                                                                                    | 510.77  | 2 | 19.09 | 2925555 | 19.08 | 2125581  | 0.94383 |
| VTAVIPCFPYAR              | Prps RE57174p                                                                                                                                 | 697.368 | 2 | 40.66 | 474085  | 40.36 | 413943   | 1.13424 |
| VYAILTHGIFSGPAISR         | Prps RE57174p                                                                                                                                 | 601.337 | 3 | 42.95 | 672496  | 42.83 | 628268   | 1.21361 |
| VTAVIPCFPYAR              | Prps Uncharacterized protein, isoform B (EC 2.7.6.1)                                                                                          | 697.368 | 2 | 40.66 | 474085  | 40.36 | 413943   | 1.13424 |
| VYAILTHGIFSGPAISR         | Prps Uncharacterized protein, isoform B (EC 2.7.6.1)                                                                                          | 601.337 | 3 | 42.95 | 672496  | 42.83 | 628268   | 1.21361 |
| YPQSQIPPLQPYQR            | CG14153 RE35371p                                                                                                                              | 647.339 | 3 | 28.49 | 4310    | 28.68 | 418214   | 1.2605  |
| GGGSGTDFYNQQR             | tral GH08269p (Trailer hitch, isoform A) (Trailer hitch, isoform B)                                                                           | 693.805 | 2 | 16.19 | 310314  | 16.14 | 351936   | 1.47328 |
| AHEGYIQLSK                | CG11279 GEO07182p1 (GM21080p)                                                                                                                 | 573.301 | 2 | 19.18 | 1084597 | 19.28 | 1934844  | 2.31739 |
| AHEGYIQLSK                | CG11279 GEO07182p1 (GM21080p)                                                                                                                 | 382.537 | 3 | 19.14 | 371205  | 19.14 | 545452   | 1.90882 |
| SVESELR                   | CG11279 GEO07182p1 (GM21080p)                                                                                                                 | 410.214 | 2 | 15.65 | 1324624 | 15.63 | 1386481  | 1.3597  |
| LAVAEFR                   | Hsc70Cb Hsc70Cb, isoform A (Hsc70Cb, isoform B) (Hsc70Cb, isoform C) (Hsc70Cb, isoform D)                                                     | 403.232 | 2 | 26.17 | 448094  | 26.11 | 568800   | 1.64897 |
| TADSPVQISAVR              | Hsc70Cb Hsc70Cb, isoform A (Hsc70Cb, isoform B) (Hsc70Cb, isoform C) (Hsc70Cb, isoform D)                                                     | 622.336 | 2 | 25.12 | 1436637 | 25.06 | 841173   | 0.76061 |
| LVDSGFHPEAFDVGGQPTAVVDR   | SsRbeta Translocon-associated protein subunit beta (TRAP-beta) (Signal sequence receptor subunit beta)                                        | 838.087 | 3 | 40.66 | 2020733 | 40.46 | 1937125  | 1.24529 |
| YTIENVGSGAATK             | SsRbeta Translocon-associated protein subunit beta (TRAP-beta) (Signal sequence receptor subunit beta)                                        | 664.846 | 2 | 33.12 | 1236140 | 33.02 | 1805212  | 1.89707 |
| NNYDGLTSSYTTAPFEFAGPYSSR  | CG13047 Uncharacterized protein                                                                                                               | 882.398 | 3 | 45.57 | 1619853 | 45.35 | 1817136  | 1.45725 |

|                           |         |                                                                                    |  |         |   |       |         |       |         |         |
|---------------------------|---------|------------------------------------------------------------------------------------|--|---------|---|-------|---------|-------|---------|---------|
| YVSGIPAAPAVVAK            | CG13047 | Uncharacterized protein                                                            |  | 671.89  | 2 | 31.49 | 6867514 | 31.35 | 8839718 | 1.6721  |
| VAIIDLQDNLEEFVK           | Pdh     | HL08057p (IP03491p) (Photoreceptor dehydrogenase, isoform A) (EC 1.1.1.1)          |  | 873.47  | 2 | 52.44 | 438704  | 52.21 | 466578  | 1.38158 |
| AIELVHK                   | UQCR-C2 | AT02348p (Ubiquinol-cytochrome c reductase core protein 2, isoform A) (EC 1.1.1.1) |  | 405.248 | 2 | 16.79 | 126835  | 16.8  | 172499  | 1.76673 |
| EALAFAILQALGAK            | UQCR-C2 | AT02348p (Ubiquinol-cytochrome c reductase core protein 2, isoform A) (EC 1.1.1.1) |  | 772.938 | 2 | 62.65 | 170205  | 62.74 | 0       | 0       |
| EALAFAILQALGAK            | UQCR-C2 | AT02348p (Ubiquinol-cytochrome c reductase core protein 2, isoform A) (EC 1.1.1.1) |  | 515.628 | 3 | 62.58 | 74861   | 62.77 | 11133   | 0.19319 |
| LAVGLSTQNSTAFIAR          | UQCR-C2 | AT02348p (Ubiquinol-cytochrome c reductase core protein 2, isoform A) (EC 1.1.1.1) |  | 839.45  | 2 | 33.65 | 746600  | 33.41 | 2728467 | 4.74737 |
| LAVGAIGHLANVPYASDLA       | UQCR-C2 | AT02348p (Ubiquinol-cytochrome c reductase core protein 2, isoform A) (EC 1.1.1.1) |  | 926.502 | 2 | 45.81 | 1586094 | 45.61 | 1624191 | 1.33024 |
| LVVATADATLPVSR            | UQCR-C2 | AT02348p (Ubiquinol-cytochrome c reductase core protein 2, isoform A) (EC 1.1.1.1) |  | 706.909 | 2 | 32.76 | 1081464 | 32.64 | 965724  | 1.16001 |
| NVLEADALLGAIDGISQSQVQEA   | UQCR-C2 | AT02348p (Ubiquinol-cytochrome c reductase core protein 2, isoform A) (EC 1.1.1.1) |  | 847.445 | 3 | 53.98 | 310764  | 53.7  | 726980  | 3.03888 |
| LVPVATSHQFVTR             | CG13026 | Uncharacterized protein, isoform B (Uncharacterized protein, isoform C)            |  | 727.909 | 2 | 25.16 | 634571  | 25.1  | 470066  | 0.96228 |
| IGGVTEILAK                | GS      | GH26789p                                                                           |  | 557.348 | 2 | 40.98 | 21782   | 40.9  | 251762  | 15.0146 |
| LVSEVGVVVASGVAK           | GS      | GH26789p                                                                           |  | 735.93  | 2 | 33.15 | 0       | 33.02 | 197421  | #DIV/0! |
| AFAGAISK                  | UQCR-Q  | AT13736p (GEO08881p1) (Ubiquinol-cytochrome c reductase ubiquinone-bin             |  | 382.719 | 2 | 16.94 | 2457756 | 16.95 | 3271900 | 1.72935 |
| LSPFEQR                   | UQCR-Q  | AT13736p (GEO08881p1) (Ubiquinol-cytochrome c reductase ubiquinone-bin             |  | 438.732 | 2 | 20.96 | 3697092 | 20.97 | 5274297 | 1.85322 |
| SNVFIIVTPPFIVGYLIYDLTER   | UQCR-Q  | AT13736p (GEO08881p1) (Ubiquinol-cytochrome c reductase ubiquinone-bin             |  | 852.796 | 3 | 65.7  | 345422  | 65.71 | 194668  | 0.73209 |
| VHGIVTYK                  | UQCR-Q  | AT13736p (GEO08881p1) (Ubiquinol-cytochrome c reductase ubiquinone-bin             |  | 458.766 | 2 | 15.41 | 1114019 | 15.36 | 1240016 | 1.44596 |
| DDEVQVIR                  | Rpl26   | GEO07453p1 (RE17611p) (Ribosomal protein L26, isoform A) (Ribosomal prc            |  | 487.251 | 2 | 20.33 | 646067  | 20.31 | 313988  | 0.63133 |
| HFAQPSHIR                 | Rpl26   | GEO07453p1 (RE17611p) (Ribosomal protein L26, isoform A) (Ribosomal prc            |  | 364.861 | 3 | 13.63 | 2235615 | 13.59 | 2327669 | 1.35253 |
| APAPVFAAPVAAPLAAPILNR     | CG14095 | Uncharacterized protein                                                            |  | 1049.61 | 2 | 51.53 | 517911  | 51.2  | 241907  | 0.60676 |
| APAPVFAAPVAAPLAAPILNR     | CG14095 | Uncharacterized protein                                                            |  | 700.077 | 3 | 51.53 | 2270896 | 51.24 | 1187401 | 0.67924 |
| VAPFAAPIATPFAAPYAHPYAAPVL | CG14095 | Uncharacterized protein                                                            |  | 908.163 | 3 | 49.29 | 3508338 | 49.09 | 3146724 | 1.16514 |
| DGVLTVDAPLPALTAGETLIPIAHK | dHspB8  | LD37169p                                                                           |  | 838.139 | 3 | 55.9  | 27215   | 55.42 | 322725  | 15.4045 |
| GVPESIR                   | dHspB8  | LD37169p                                                                           |  | 436.235 | 2 | 16.4  | 162532  | 16.45 | 263810  | 2.10851 |
| ASAIQHILEHQSPAAGR         | htk     | Hat-trick, isoform D                                                               |  | 595.983 | 3 | 25.4  | 244189  | 25.35 | 157660  | 0.83872 |
| LQQEELGQAQGSK             | htk     | Hat-trick, isoform D                                                               |  | 836.418 | 2 | 14.34 | 322759  | 14.31 | 224397  | 0.90315 |
| ELIAICER                  | CG1461  | Tyrosine aminotransferase (TAT) (EC 2.6.1.5)                                       |  | 502.266 | 2 | 27.85 | 2234    | 27.8  | 41760   | 24.2828 |
| HYLPIADEIYEHFVFPQSK       | CG1461  | Tyrosine aminotransferase (TAT) (EC 2.6.1.5)                                       |  | 792.407 | 3 | 56.7  | 42312   | 56.72 | 117214  | 3.59864 |
| IVLTVPGAMIEEACSR          | CG1461  | Tyrosine aminotransferase (TAT) (EC 2.6.1.5)                                       |  | 873.45  | 2 | 44.08 | 2644    | 44.26 | 146014  | 71.739  |
| NFIEHLLDCDDVAF            | CG1461  | Tyrosine aminotransferase (TAT) (EC 2.6.1.5)                                       |  | 882.899 | 2 | 46.9  | 27995   | 46.68 | 41195   | 1.91155 |
| INLIER                    | Brms1   | BRMS1 (LD14895p)                                                                   |  | 379.232 | 2 | 23.44 | 2578008 | 23.49 | 2364046 | 1.19123 |
| ILDELEEEVYEINAEQQFLLLR    | Lint-1  | L(3)mbt interacting protein 1, isoform A (L(3)mbt interacting protein 1, isoform   |  | 902.801 | 3 | 61.89 | 784107  | 61.7  | 561166  | 0.92969 |
| LNDSLQEFVSK               | Lint-1  | L(3)mbt interacting protein 1, isoform A (L(3)mbt interacting protein 1, isoform   |  | 640.33  | 2 | 31.72 | 1131452 | 31.63 | 1444369 | 1.6583  |
| TQPEEYQGETFLGLFELYSPVLK   | Lint-1  | L(3)mbt interacting protein 1, isoform A (L(3)mbt interacting protein 1, isoform   |  | 939.8   | 3 | 64.56 | 308483  | 64.3  | 525500  | 2.21291 |
| TVQNASGVDFHYGQQLNAVDALVM  | Lint-1  | L(3)mbt interacting protein 1, isoform A (L(3)mbt interacting protein 1, isoform   |  | 969.147 | 3 | 46.58 | 2486428 | 46.37 | 2112926 | 1.1039  |
| LSDVTVTPIPR               | CDK2AP  | CDK2-associated protein 1, isoform A (F105233p)                                    |  | 599.346 | 2 | 29.17 | 1997051 | 29.1  | 2367705 | 1.54014 |
| SQVQNFYNYQQQR             | CDK2AP  | CDK2-associated protein 1, isoform A (F105233p)                                    |  | 851.9   | 2 | 23.81 | 499679  | 23.84 | 647495  | 1.68332 |
| LGAGAGTGYPYNTNR           | CG2157  | LP02042p                                                                           |  | 780.876 | 2 | 24.59 | 230436  | 24.56 | 514144  | 2.89839 |
| DVPVAVAPVAVPLAK           | Cpr64Ad | Cuticular protein 64Ad (RE69226p)                                                  |  | 723.44  | 2 | 40.41 | 8575854 | 40.19 | 9120881 | 1.3816  |
| FAYDVQDTLTGDSK            | Cpr64Ad | Cuticular protein 64Ad (RE69226p)                                                  |  | 780.365 | 2 | 32.1  | 2517516 | 31.94 | 1573502 | 0.81193 |
| GSYSLIEPDGSR              | Cpr64Ad | Cuticular protein 64Ad (RE69226p)                                                  |  | 640.809 | 2 | 26.13 | 3158432 | 26.11 | 2432972 | 1.00066 |
| TVAAPVAPVAAAAPAPVFAK      | Cpr64Ad | Cuticular protein 64Ad (RE69226p)                                                  |  | 924.043 | 2 | 41.95 | 5529904 | 41.71 | 6193381 | 1.4549  |
| TVAAPVAPVAAAAPAPVFAK      | Cpr64Ad | Cuticular protein 64Ad (RE69226p)                                                  |  | 616.364 | 3 | 41.95 | 3358153 | 41.71 | 4283161 | 1.65686 |
| TYAAAPFAAPFAAPVAPVAAR     | Cpr64Ad | Cuticular protein 64Ad (RE69226p)                                                  |  | 1015.55 | 2 | 46.4  | 6035925 | 46.19 | 6138683 | 1.32115 |
| TYAAAPFAAPFAAPVAPVAAR     | Cpr64Ad | Cuticular protein 64Ad (RE69226p)                                                  |  | 677.367 | 3 | 46.4  | 6287974 | 46.15 | 6849990 | 1.41515 |
| GSYSVVDADGSLR             | Cpr64Ab | Cuticular protein 64Ab (GEO10707p1)                                                |  | 663.32  | 2 | 25.6  | 2217422 | 25.52 | 1531983 | 0.89749 |
| STISINVAGASLTR            | ens     | Ensconsin, isoform B                                                               |  | 682.362 | 2 | 25.86 | 816429  | 25.79 | 694557  | 1.10513 |
| AIGEFTVANEHLNR            | BcDNA:R | CG16985 protein (CG16985-PA) (GEO07616p1) (RE30174p)                               |  | 785.902 | 2 | 28.11 | 512160  | 28.08 | 482749  | 1.22444 |
| AIGEFTVANEHLNR            | BcDNA:R | CG16985 protein (CG16985-PA) (GEO07616p1) (RE30174p)                               |  | 524.271 | 3 | 28.15 | 1306259 | 28.01 | 1428046 | 1.42015 |
| GQYSLVEPDGSIR             | Cpr62Bb | Cuticular protein 62Bb, isoform A (Cuticular protein 62Bb, isoform B) (Cuticul     |  | 710.857 | 2 | 29.1  | 764886  | 29.02 | 975676  | 1.65703 |
| TVDYTADSIHGFNAVVTK        | Cpr62Bb | Cuticular protein 62Bb, isoform A (Cuticular protein 62Bb, isoform B) (Cuticul     |  | 646.658 | 3 | 33.06 | 1350578 | 32.91 | 1897710 | 1.82529 |
| YAFNYGVADHSTGDVK          | Cpr62Bb | Cuticular protein 62Bb, isoform A (Cuticular protein 62Bb, isoform B) (Cuticul     |  | 581.937 | 3 | 25.93 | 1003839 | 25.87 | 1635503 | 2.11646 |
| YYLGIFFK                  | tfc     | RE15268p (Triforce, isoform A) (Triforce, isoform C)                               |  | 525.787 | 2 | 48.48 | 464111  | 48.22 | 385306  | 1.07847 |
| ALTTLNKPDLAPNSR           | Crtp    | Caldesmon-related protein (F124430p1)                                              |  | 537.634 | 3 | 38.02 | 218088  | 37.87 | 927387  | 5.52397 |

|                           |          |                                                                              |         |   |       |         |       |          |         |
|---------------------------|----------|------------------------------------------------------------------------------|---------|---|-------|---------|-------|----------|---------|
| CVGGEVGTSSLAPK            | RpL12    | GEO07602p1 (RE28824p) (Ribosomal protein L12, isoform A) (Ribosomal pr       | 716.859 | 2 | 22.65 | 976048  | 22.64 | 1029705  | 1.37045 |
| HSGNIGFEDILAIAR           | RpL12    | GEO07602p1 (RE28824p) (Ribosomal protein L12, isoform A) (Ribosomal pr       | 806.926 | 2 | 46.59 | 1617829 | 46.41 | 1499515  | 1.20404 |
| HSGNIGFEDILAIAR           | RpL12    | GEO07602p1 (RE28824p) (Ribosomal protein L12, isoform A) (Ribosomal pr       | 538.286 | 3 | 46.59 | 5548026 | 46.45 | 5434465  | 1.27245 |
| IGPLGLSPK                 | RpL12    | GEO07602p1 (RE28824p) (Ribosomal protein L12, isoform A) (Ribosomal pr       | 441.276 | 2 | 29.56 | 3940882 | 29.48 | 4841355  | 1.59586 |
| STVDPNDPFAFEGPEIYK        | Nap1     | LD21576p (MIP15604p) (Nucleosome assembly protein 1, isoform A) (Nucleo      | 1013.48 | 2 | 42.58 | 250367  | 42.4  | 382398   | 1.98409 |
| EAALAAGF5NK               | Mtpbeta  | GH13256p (Thiolase) (EC 1.1.1.211) (EC 2.3.1.16) (EC 4.2.1.17) (EC 4.2.1.7   | 539.78  | 2 | 22.68 | 1336355 | 22.68 | 566491   | 0.55067 |
| GYFTDLVPFK                | Mtpbeta  | GH13256p (Thiolase) (EC 1.1.1.211) (EC 2.3.1.16) (EC 4.2.1.17) (EC 4.2.1.7   | 593.811 | 2 | 46.75 | 559291  | 46.49 | 310100   | 0.72025 |
| HSLLSLLQK                 | Mtpbeta  | GH13256p (Thiolase) (EC 1.1.1.211) (EC 2.3.1.16) (EC 4.2.1.17) (EC 4.2.1.7   | 519.819 | 2 | 36.67 | 1905280 | 36.52 | 1640452  | 1.11848 |
| LASAFNVSR                 | Mtpbeta  | GH13256p (Thiolase) (EC 1.1.1.211) (EC 2.3.1.16) (EC 4.2.1.17) (EC 4.2.1.7   | 482.764 | 2 | 23.13 | 1522885 | 23.18 | 826583   | 0.70509 |
| SEQDEYALR                 | Mtpbeta  | GH13256p (Thiolase) (EC 1.1.1.211) (EC 2.3.1.16) (EC 4.2.1.17) (EC 4.2.1.7   | 555.757 | 2 | 17.25 | 1380614 | 17.26 | 1028286  | 0.96753 |
| YVGEIGDVVVAR              | Rrp4     | Rrp4, isoform A (Rrp4, isoform B)                                            | 638.848 | 2 | 32.53 | 400053  | 32.41 | 263223   | 0.85473 |
| SLFHNPHVNALPDGYEH         | levy     | Levy, isoform A (Levy, isoform B) (RH03295p)                                 | 649.643 | 3 | 29.17 | 575588  | 29.09 | 809870   | 1.82779 |
| FLAPQAQGPVGLALDIPIGILR    | CG9812   | Uncharacterized protein, isoform D                                           | 1130.16 | 2 | 63.35 | 1256442 | 63.16 | 1860146  | 1.92321 |
| FLAPQAQGPVGLALDIPIGILR    | CG9812   | Uncharacterized protein, isoform D                                           | 753.779 | 3 | 63.38 | 2942061 | 63.13 | 4898123  | 2.16272 |
| SVQRPQAVNNR               | CG9812   | Uncharacterized protein, isoform D                                           | 634.845 | 2 | 9.41  | 110272  | 9.55  | 122764   | 1.4462  |
| SVQRPQAVNNR               | CG9812   | Uncharacterized protein, isoform D                                           | 423.565 | 3 | 9.37  | 375735  | 9.52  | 435353   | 1.50516 |
| TAGVGYAAAQANPSV GASALLGGS | CG9812   | Uncharacterized protein, isoform D                                           | 920.702 | 4 | 36.12 | 888234  | 35.9  | 1594106  | 2.33137 |
| GATALGPATTSGASER          | PIP5K59E | FI05352p (Phosphatidylinositol 4-phosphate 5-kinase at 59B, isoform A) (EC ; | 723.863 | 2 | 16.98 | 232423  | 17.03 | 258407   | 1.44427 |
| GATALGPATTSGASER          | PIP5K59E | Phosphatidylinositol 4-phosphate 5-kinase at 59B, isoform E (EC 2.7.1.-) (EC | 723.863 | 2 | 16.98 | 232423  | 17.03 | 258407   | 1.44427 |
| ASPSLYGTAER               | jbug     | Jitterbug, isoform L                                                         | 576.288 | 2 | 18.78 | 139955  | 18.74 | 220071   | 2.04266 |
| ASPSLYGTAER               | jbug     | Jitterbug, isoform F                                                         | 576.288 | 2 | 18.78 | 139955  | 18.74 | 220071   | 2.04266 |
| HGLFEQK                   | RpS24    | 40S ribosomal protein S24                                                    | 429.727 | 2 | 15.65 | 734143  | 15.55 | 688748   | 1.21871 |
| VTPDVVFAGFR               | RpS24    | 40S ribosomal protein S24                                                    | 677.861 | 2 | 51.03 | 3258168 | 50.75 | 2847528  | 1.13532 |
| ILAAFFFPK                 | Ugt49B1  | UDP-glucuronosyltransferase (EC 2.4.1.17)                                    | 555.821 | 2 | 49.15 | 2262101 | 48.94 | 1079689  | 0.62002 |
| NTVLEMTDLPTFAFLR          | Ugt49B1  | UDP-glucuronosyltransferase (EC 2.4.1.17)                                    | 942.482 | 2 | 53.08 | 2090973 | 52.94 | 532690   | 0.33094 |
| SHFMMTNAIIR               | Ugt49B1  | UDP-glucuronosyltransferase (EC 2.4.1.17)                                    | 668.829 | 2 | 28.29 | 606574  | 28.21 | 392749   | 0.84111 |
| VFLEVFGSLK                | Ugt49B1  | UDP-glucuronosyltransferase (EC 2.4.1.17)                                    | 569.829 | 2 | 47.97 | 3258128 | 47.71 | 3007730  | 1.1992  |
| ATYAVMGLLIAYQVLKPK        | Neb-cGP  | Neb-cGP, isoform A (Neb-cGP, isoform B) (RE31692p) (RH45340p)                | 660.385 | 3 | 60.54 | 1171729 | 60.48 | 1047522  | 1.16134 |
| AQAAIAVEVAEALVK           | ATPsynde | ATP synthase, delta subunit, isoform A (ATP synthase, delta subunit, isoform | 741.93  | 2 | 51.6  | 570354  | 51.28 | 878625   | 2.00116 |
| ALLSLPTAIADNAGYDSAQLVSELR | CCT2     | Chaperonin containing TCP1 subunit 2 (SD02216p)                              | 1294.68 | 2 | 58.23 | 1928466 | 58.01 | 2488253  | 1.67612 |
| ALLSLPTAIADNAGYDSAQLVSELR | CCT2     | Chaperonin containing TCP1 subunit 2 (SD02216p)                              | 863.457 | 3 | 58.19 | 9879444 | 58.01 | 10569201 | 1.38973 |
| AVGVNDNPAK                | CCT2     | Chaperonin containing TCP1 subunit 2 (SD02216p)                              | 471.256 | 2 | 13.5  | 877078  | 13.47 | 639345   | 0.94693 |
| CNVFINR                   | CCT2     | Chaperonin containing TCP1 subunit 2 (SD02216p)                              | 461.732 | 2 | 21.15 | 360213  | 21.15 | 430311   | 1.55183 |
| EAI AIEAFAR               | CCT2     | Chaperonin containing TCP1 subunit 2 (SD02216p)                              | 545.798 | 2 | 36.37 | 1126825 | 36.16 | 819469   | 0.94471 |
| IADLEMAEK                 | CCT2     | Chaperonin containing TCP1 subunit 2 (SD02216p)                              | 518.255 | 2 | 17.6  | 116035  | 17.64 | 184706   | 2.06783 |
| ILVATGR                   | CCT2     | Chaperonin containing TCP1 subunit 2 (SD02216p)                              | 365.235 | 2 | 17.02 | 3243592 | 17.03 | 2722743  | 1.09044 |
| LAYCTGGEIVSTFENPSLVK      | CCT2     | Chaperonin containing TCP1 subunit 2 (SD02216p)                              | 1093.05 | 2 | 43.84 | 1333044 | 43.62 | 996915   | 0.97148 |
| LAYCTGGEIVSTFENPSLVK      | CCT2     | Chaperonin containing TCP1 subunit 2 (SD02216p)                              | 729.033 | 3 | 43.84 | 1612664 | 43.66 | 1524278  | 1.22784 |
| LGEACTIVIR                | CCT2     | Chaperonin containing TCP1 subunit 2 (SD02216p)                              | 566.313 | 2 | 28.26 | 3652809 | 28.2  | 3881738  | 1.38045 |
| LGECDVIEQVMIGEDTLR        | CCT2     | Chaperonin containing TCP1 subunit 2 (SD02216p)                              | 730.698 | 3 | 56.69 | 321606  | 56.4  | 337532   | 1.36337 |
| LGECDVIEQVMIGEDTLR        | CCT2     | Chaperonin containing TCP1 subunit 2 (SD02216p)                              | 736.029 | 3 | 51.31 | 385622  | 50.95 | 378485   | 1.275   |
| LSSFIGAIAIGDLVK           | CCT2     | Chaperonin containing TCP1 subunit 2 (SD02216p)                              | 752.443 | 2 | 54.88 | 9430067 | 54.6  | 11966694 | 1.64847 |
| LSSFIGAIAIGDLVK           | CCT2     | Chaperonin containing TCP1 subunit 2 (SD02216p)                              | 501.964 | 3 | 54.85 | 412679  | 54.6  | 596085   | 1.87637 |
| NAGHVEVTNDGATILR          | CCT2     | Chaperonin containing TCP1 subunit 2 (SD02216p)                              | 833.929 | 2 | 24.19 | 891284  | 24.2  | 1103077  | 1.60773 |
| NAGHVEVTNDGATILR          | CCT2     | Chaperonin containing TCP1 subunit 2 (SD02216p)                              | 556.288 | 3 | 24.23 | 4363636 | 24.2  | 5712773  | 1.70067 |
| QATQVALEAL TAAQDNSSSDEK   | CCT2     | Chaperonin containing TCP1 subunit 2 (SD02216p)                              | 783.379 | 3 | 39.58 | 351059  | 39.37 | 148801   | 0.55062 |
| QLIYNYPEQLFADAR           | CCT2     | Chaperonin containing TCP1 subunit 2 (SD02216p)                              | 614.312 | 3 | 46.95 | 441710  | 46.72 | 616657   | 1.81355 |
| QTLGLDMELGK               | CCT2     | Chaperonin containing TCP1 subunit 2 (SD02216p)                              | 602.816 | 2 | 36.05 | 342380  | 35.86 | 395495   | 1.50057 |
| SGGTLGDSFLDEGFLDK         | CCT2     | Chaperonin containing TCP1 subunit 2 (SD02216p)                              | 935.957 | 2 | 51    | 555102  | 50.75 | 429057   | 1.00407 |
| SLHDALCVLAATVK            | CCT2     | Chaperonin containing TCP1 subunit 2 (SD02216p)                              | 499.941 | 3 | 45.14 | 803057  | 44.97 | 267410   | 0.43257 |
| VDNIIR                    | CCT2     | Chaperonin containing TCP1 subunit 2 (SD02216p)                              | 365.216 | 2 | 16.71 | 2405682 | 16.72 | 1267340  | 0.68435 |
| VMSIEHADFDGIER            | CCT2     | Chaperonin containing TCP1 subunit 2 (SD02216p)                              | 809.88  | 2 | 31.34 | 278355  | 31.27 | 233245   | 1.08852 |
| VQDEEVGDGTTSVTVLASELLR    | CCT2     | Chaperonin containing TCP1 subunit 2 (SD02216p)                              | 1159.59 | 2 | 53.99 | 1961062 | 53.69 | 1720362  | 1.1396  |

|                        |         |                                                                         |         |   |       |          |       |          |         |
|------------------------|---------|-------------------------------------------------------------------------|---------|---|-------|----------|-------|----------|---------|
| VQDEEVGDGTTSVTVLASELLR | CCT2    | Chaperonin containing TCP1 subunit 2 (SD02216p)                         | 773.396 | 3 | 54.02 | 4045842  | 53.69 | 2249428  | 0.72225 |
| YGVVEVPK               | Upf2    | RE04053p (Upf2)                                                         | 396.219 | 2 | 18.74 | 1025713  | 18.73 | 969049   | 1.22728 |
| GTCELSIGSPAPVVISNFGSQR | CG2233  | GH20802p                                                                | 759.383 | 3 | 42.99 | 233628   | 42.76 | 526580   | 2.92794 |
| SGTGGQDEFVIIIGHNSPFYR  | CG2233  | GH20802p                                                                | 708.676 | 3 | 39.43 | 326208   | 39.27 | 483470   | 1.92529 |
| FGCLSFVFFVPSVDLLQAQAR  | PF1     | GH06635p                                                                | 785.084 | 3 | 63.1  | 388      | 62.89 | 561      | 1.87825 |
| ESTLHLVLR              | Ubi-p5E | GH17761p (Ubiquitin-5E, isoform A) (Ubiquitin-5E, isoform B)            | 534.314 | 2 | 29.06 | 19834334 | 28.96 | 12823394 | 0.83986 |
| ESTLHLVLR              | Ubi-p5E | GH17761p (Ubiquitin-5E, isoform A) (Ubiquitin-5E, isoform B)            | 356.545 | 3 | 29.02 | 13873703 | 28.96 | 8349692  | 0.78181 |
| ESTLHLVLR              | Ubi-p5E | GH17761p (Ubiquitin-5E, isoform A) (Ubiquitin-5E, isoform B)            | 534.314 | 2 | 29.06 | 19834334 | 28.96 | 12823394 | 0.83986 |
| ESTLHLVLR              | Ubi-p5E | GH17761p (Ubiquitin-5E, isoform A) (Ubiquitin-5E, isoform B)            | 356.545 | 3 | 29.02 | 13873703 | 28.96 | 8349692  | 0.78181 |
| ESTLHLVLR              | Ubi-p5E | GH17761p (Ubiquitin-5E, isoform A) (Ubiquitin-5E, isoform B)            | 534.314 | 2 | 29.06 | 19834334 | 28.96 | 12823394 | 0.83986 |
| ESTLHLVLR              | Ubi-p5E | GH17761p (Ubiquitin-5E, isoform A) (Ubiquitin-5E, isoform B)            | 356.545 | 3 | 29.02 | 13873703 | 28.96 | 8349692  | 0.78181 |
| ESTLHLVLR              | Ubi-p5E | GH17761p (Ubiquitin-5E, isoform A) (Ubiquitin-5E, isoform B)            | 534.314 | 2 | 29.06 | 19834334 | 28.96 | 12823394 | 0.83986 |
| ESTLHLVLR              | Ubi-p5E | GH17761p (Ubiquitin-5E, isoform A) (Ubiquitin-5E, isoform B)            | 356.545 | 3 | 29.02 | 13873703 | 28.96 | 8349692  | 0.78181 |
| ESTLHLVLR              | Ubi-p5E | GH17761p (Ubiquitin-5E, isoform A) (Ubiquitin-5E, isoform B)            | 534.314 | 2 | 29.06 | 19834334 | 28.96 | 12823394 | 0.83986 |
| ESTLHLVLR              | Ubi-p5E | GH17761p (Ubiquitin-5E, isoform A) (Ubiquitin-5E, isoform B)            | 356.545 | 3 | 29.02 | 13873703 | 28.96 | 8349692  | 0.78181 |
| ESTLHLVLR              | Ubi-p5E | GH17761p (Ubiquitin-5E, isoform A) (Ubiquitin-5E, isoform B)            | 534.314 | 2 | 29.06 | 19834334 | 28.96 | 12823394 | 0.83986 |
| ESTLHLVLR              | Ubi-p5E | GH17761p (Ubiquitin-5E, isoform A) (Ubiquitin-5E, isoform B)            | 356.545 | 3 | 29.02 | 13873703 | 28.96 | 8349692  | 0.78181 |
| ESTLHLVLR              | Ubi-p5E | GH17761p (Ubiquitin-5E, isoform A) (Ubiquitin-5E, isoform B)            | 534.314 | 2 | 29.06 | 19834334 | 28.96 | 12823394 | 0.83986 |
| ESTLHLVLR              | Ubi-p5E | GH17761p (Ubiquitin-5E, isoform A) (Ubiquitin-5E, isoform B)            | 356.545 | 3 | 29.02 | 13873703 | 28.96 | 8349692  | 0.78181 |
| MQIFVK                 | Ubi-p5E | GH17761p (Ubiquitin-5E, isoform A) (Ubiquitin-5E, isoform B)            | 383.22  | 2 | 27.43 | 8697430  | 27.39 | 10348569 | 1.54565 |
| TITLEVEPSDTIENVK       | Ubi-p5E | GH17761p (Ubiquitin-5E, isoform A) (Ubiquitin-5E, isoform B)            | 894.467 | 2 | 36.85 | 41743372 | 36.64 | 47966256 | 1.49269 |
| TITLEVEPSDTIENVK       | Ubi-p5E | GH17761p (Ubiquitin-5E, isoform A) (Ubiquitin-5E, isoform B)            | 596.647 | 3 | 36.85 | 1563861  | 36.68 | 1963090  | 1.63066 |
| TITLEVEPSDTIENVK       | Ubi-p5E | GH17761p (Ubiquitin-5E, isoform A) (Ubiquitin-5E, isoform B)            | 894.467 | 2 | 36.85 | 41743372 | 36.64 | 47966256 | 1.49269 |
| TITLEVEPSDTIENVK       | Ubi-p5E | GH17761p (Ubiquitin-5E, isoform A) (Ubiquitin-5E, isoform B)            | 596.647 | 3 | 36.85 | 1563861  | 36.68 | 1963090  | 1.63066 |
| TITLEVEPSDTIENVK       | Ubi-p5E | GH17761p (Ubiquitin-5E, isoform A) (Ubiquitin-5E, isoform B)            | 894.467 | 2 | 36.85 | 41743372 | 36.64 | 47966256 | 1.49269 |
| TITLEVEPSDTIENVK       | Ubi-p5E | GH17761p (Ubiquitin-5E, isoform A) (Ubiquitin-5E, isoform B)            | 596.647 | 3 | 36.85 | 1563861  | 36.68 | 1963090  | 1.63066 |
| TITLEVEPSDTIENVK       | Ubi-p5E | GH17761p (Ubiquitin-5E, isoform A) (Ubiquitin-5E, isoform B)            | 894.467 | 2 | 36.85 | 41743372 | 36.64 | 47966256 | 1.49269 |
| TITLEVEPSDTIENVK       | Ubi-p5E | GH17761p (Ubiquitin-5E, isoform A) (Ubiquitin-5E, isoform B)            | 596.647 | 3 | 36.85 | 1563861  | 36.68 | 1963090  | 1.63066 |
| TITLEVEPSDTIENVK       | Ubi-p5E | GH17761p (Ubiquitin-5E, isoform A) (Ubiquitin-5E, isoform B)            | 894.467 | 2 | 36.85 | 41743372 | 36.64 | 47966256 | 1.49269 |
| TITLEVEPSDTIENVK       | Ubi-p5E | GH17761p (Ubiquitin-5E, isoform A) (Ubiquitin-5E, isoform B)            | 596.647 | 3 | 36.85 | 1563861  | 36.68 | 1963090  | 1.63066 |
| TITLEVEPSDTIENVK       | Ubi-p5E | GH17761p (Ubiquitin-5E, isoform A) (Ubiquitin-5E, isoform B)            | 894.467 | 2 | 36.85 | 41743372 | 36.64 | 47966256 | 1.49269 |
| TITLEVEPSDTIENVK       | Ubi-p5E | GH17761p (Ubiquitin-5E, isoform A) (Ubiquitin-5E, isoform B)            | 596.647 | 3 | 36.85 | 1563861  | 36.68 | 1963090  | 1.63066 |
| TITLEVEPSDTIENVK       | Ubi-p5E | GH17761p (Ubiquitin-5E, isoform A) (Ubiquitin-5E, isoform B)            | 894.467 | 2 | 36.85 | 41743372 | 36.64 | 47966256 | 1.49269 |
| TITLEVEPSDTIENVK       | Ubi-p5E | GH17761p (Ubiquitin-5E, isoform A) (Ubiquitin-5E, isoform B)            | 596.647 | 3 | 36.85 | 1563861  | 36.68 | 1963090  | 1.63066 |
| TLSDYNIQK              | Ubi-p5E | GH17761p (Ubiquitin-5E, isoform A) (Ubiquitin-5E, isoform B)            | 541.28  | 2 | 19.53 | 19914654 | 19.52 | 7860957  | 0.51277 |
| TLSDYNIQK              | Ubi-p5E | GH17761p (Ubiquitin-5E, isoform A) (Ubiquitin-5E, isoform B)            | 541.28  | 2 | 19.53 | 19914654 | 19.52 | 7860957  | 0.51277 |
| TLSDYNIQK              | Ubi-p5E | GH17761p (Ubiquitin-5E, isoform A) (Ubiquitin-5E, isoform B)            | 541.28  | 2 | 19.53 | 19914654 | 19.52 | 7860957  | 0.51277 |
| TLSDYNIQK              | Ubi-p5E | GH17761p (Ubiquitin-5E, isoform A) (Ubiquitin-5E, isoform B)            | 541.28  | 2 | 19.53 | 19914654 | 19.52 | 7860957  | 0.51277 |
| TLSDYNIQK              | Ubi-p5E | GH17761p (Ubiquitin-5E, isoform A) (Ubiquitin-5E, isoform B)            | 541.28  | 2 | 19.53 | 19914654 | 19.52 | 7860957  | 0.51277 |
| TLSDYNIQK              | Ubi-p5E | GH17761p (Ubiquitin-5E, isoform A) (Ubiquitin-5E, isoform B)            | 541.28  | 2 | 19.53 | 19914654 | 19.52 | 7860957  | 0.51277 |
| TLSDYNIQK              | Ubi-p5E | GH17761p (Ubiquitin-5E, isoform A) (Ubiquitin-5E, isoform B)            | 541.28  | 2 | 19.53 | 19914654 | 19.52 | 7860957  | 0.51277 |
| FVGFTRPVVITMTR         | Vap33   | LD30122p (VAMP-associated protein 33kDa, isoform B) (VAMP-associated pi | 612.018 | 3 | 49.47 | 300313   | 49.3  | 756291   | 3.27143 |
| SLFDLPLTIEPEHELRL      | Vap33   | LD30122p (VAMP-associated protein 33kDa, isoform B) (VAMP-associated pi | 637.007 | 3 | 51.03 | 379872   | 50.9  | 998731   | 3.41534 |
| SALSELAEALK            | CG14419 | RH61722p                                                                | 566.316 | 2 | 45.94 | 535910   | 45.71 | 806686   | 1.9554  |
| VSDLILPGVTPQGK         | CG3091  | RH61816p                                                                | 825.975 | 2 | 45.08 | 47759    | 44.02 | 510307   | 13.8803 |
| LQRPVASTVGESASQSV      | CG13377 | RE15974p                                                                | 858.45  | 2 | 21.39 | 46513    | 22.9  | 60244    | 1.68253 |
| AIGAGGQSTQVR           | Sap130  | Sin3A-associated protein 130, isoform A                                 | 572.807 | 2 | 12.25 | 925618   | 12.32 | 536264   | 0.75261 |
| GPAGGALTATNLPTR        | Sap130  | Sin3A-associated protein 130, isoform A                                 | 828.439 | 2 | 27.36 | 569694   | 27.23 | 266622   | 0.60796 |
| IGDQPATGGAGGR          | Sap130  | Sin3A-associated protein 130, isoform A                                 | 578.789 | 2 | 10.2  | 451645   | 10.33 | 79684    | 0.22919 |
| IIQLQPATGTTQQIIGSGAR   | Sap130  | Sin3A-associated protein 130, isoform A                                 | 727.738 | 3 | 34.41 | 1767358  | 34.26 | 2314474  | 1.70118 |
| QLENVATGR              | Sap130  | Sin3A-associated protein 130, isoform A                                 | 544.788 | 2 | 15.37 | 399235   | 15.31 | 452872   | 1.47356 |
| SDGGGGISIAGTPILSGGTIK  | Sap130  | Sin3A-associated protein 130, isoform A                                 | 929.499 | 2 | 41.44 | 945778   | 41.22 | 943168   | 1.29545 |
| TQITAIPAAPAR           | Sap130  | Sin3A-associated protein 130, isoform A                                 | 605.351 | 2 | 25.4  | 3213530  | 25.35 | 3375310  | 1.36444 |

|                         |          |                                                                           |         |   |       |          |       |          |         |
|-------------------------|----------|---------------------------------------------------------------------------|---------|---|-------|----------|-------|----------|---------|
| VQPSLTITQLNPIGK         | Sap130   | Sin3A-associated protein 130, isoform A                                   | 804.97  | 2 | 41.17 | 1625853  | 40.98 | 1635254  | 1.30655 |
| VTHGVASSAASVPATVGPVNSTR | Sap130   | Sin3A-associated protein 130, isoform A                                   | 722.382 | 3 | 23.81 | 505024   | 23.8  | 708422   | 1.82223 |
| VTTGAGNPQQATASGALVSSFMR | Sap130   | Sin3A-associated protein 130, isoform A                                   | 756.374 | 3 | 32.37 | 491161   | 32.25 | 670045   | 1.77216 |
| FVFDVFEEFAQK            | mmy      | LD24639p (Mummy, isoform A) (EC 2.7.7.23)                                 | 688.848 | 2 | 54.52 | 25125    | 54.13 | 69150    | 3.57527 |
| ESTLHLVLR               | Ubi-p5E5 | Uncharacterized protein                                                   | 534.314 | 2 | 29.06 | 19834334 | 28.96 | 12823394 | 0.83986 |
| ESTLHLVLR               | Ubi-p5E5 | Uncharacterized protein                                                   | 356.545 | 3 | 29.02 | 13873703 | 28.96 | 8349692  | 0.78181 |
| MQIFVK                  | Ubi-p5E5 | Uncharacterized protein                                                   | 383.22  | 2 | 27.43 | 8697430  | 27.39 | 10348569 | 1.54565 |
| TITLEVEPSDTIENVK        | Ubi-p5E5 | Uncharacterized protein                                                   | 894.467 | 2 | 36.85 | 41743372 | 36.64 | 47966256 | 1.49269 |
| TITLEVEPSDTIENVK        | Ubi-p5E5 | Uncharacterized protein                                                   | 596.647 | 3 | 36.85 | 1563861  | 36.68 | 1963090  | 1.63066 |
| TITLEVEPSDTIENVK        | Ubi-p5E5 | Uncharacterized protein                                                   | 894.467 | 2 | 36.85 | 41743372 | 36.64 | 47966256 | 1.49269 |
| TITLEVEPSDTIENVK        | Ubi-p5E5 | Uncharacterized protein                                                   | 596.647 | 3 | 36.85 | 1563861  | 36.68 | 1963090  | 1.63066 |
| TLSDYNIQK               | Ubi-p5E5 | Uncharacterized protein                                                   | 541.28  | 2 | 19.53 | 19914654 | 19.52 | 7860957  | 0.51277 |
| TLSDYNIQK               | Ubi-p5E5 | Uncharacterized protein                                                   | 541.28  | 2 | 19.53 | 19914654 | 19.52 | 7860957  | 0.51277 |
| TLSDYNIQK               | Ubi-p5E5 | Uncharacterized protein                                                   | 541.28  | 2 | 19.53 | 19914654 | 19.52 | 7860957  | 0.51277 |
| TLSDYNIQK               | Ubi-p5E5 | Uncharacterized protein                                                   | 541.28  | 2 | 19.53 | 19914654 | 19.52 | 7860957  | 0.51277 |
| ASAIQHILEHQSPAAGR       | htk      | Hat-trick, isoform C                                                      | 595.983 | 3 | 25.4  | 244189   | 25.35 | 157660   | 0.83872 |
| LQQQEELGQAQGQSK         | htk      | Hat-trick, isoform C                                                      | 836.418 | 2 | 14.34 | 322759   | 14.31 | 224397   | 0.90315 |
| IGTSEPIGR               | Syt1     | Synaptotagmin 1, isoform I                                                | 465.256 | 2 | 15.84 | 896749   | 15.87 | 539143   | 0.78101 |
| TLSPVFNFTFFK            | Syt1     | Synaptotagmin 1, isoform I                                                | 765.896 | 2 | 45.21 | 1109199  | 44.93 | 1551467  | 1.817   |
| AGIAVEGDIK              | Arr1     | Arrestin 1, isoform C                                                     | 486.772 | 2 | 22.98 | 2931108  | 22.98 | 1880959  | 0.83362 |
| ASDESQPCGVQYFVK         | Arr1     | Arrestin 1, isoform C                                                     | 857.891 | 2 | 30.22 | 589087   | 30.08 | 894673   | 1.97291 |
| DFLLSPGELELEVTLDK       | Arr1     | Arrestin 1, isoform C                                                     | 959.506 | 2 | 56.3  | 265898   | 55.99 | 462292   | 2.25852 |
| IFTGSDDCDR              | Arr1     | Arrestin 1, isoform C                                                     | 593.246 | 2 | 14.94 | 1443871  | 14.91 | 748462   | 0.67339 |
| IFVQLVCNFR              | Arr1     | Arrestin 1, isoform C                                                     | 648.35  | 2 | 42.99 | 1459871  | 42.8  | 1343715  | 1.19568 |
| ISVNICVR                | Arr1     | Arrestin 1, isoform C                                                     | 480.768 | 2 | 29.06 | 677107   | 28.92 | 402608   | 0.77241 |
| QGIQPCTVVR              | Arr1     | Arrestin 1, isoform C                                                     | 579.308 | 2 | 21.75 | 818570   | 21.73 | 482335   | 0.76545 |
| STINLGR                 | Arr1     | Arrestin 1, isoform C                                                     | 437.261 | 2 | 27.76 | 3970398  | 27.69 | 3553533  | 1.16265 |
| VMYLVPTLVANCDR          | Arr1     | Arrestin 1, isoform C                                                     | 825.921 | 2 | 44.34 | 873153   | 44.19 | 632809   | 0.94147 |
| ELSNLESVNPK             | KFase    | Kynurenine formamidase (KFA) (KFase) (EC 3.5.1.9) (Arylformamidase) (N-fc | 615.322 | 2 | 23.24 | 109557   | 23.14 | 186670   | 2.21338 |
| HYADVLR                 | KFase    | Kynurenine formamidase (KFA) (KFase) (EC 3.5.1.9) (Arylformamidase) (N-fc | 437.233 | 2 | 16.26 | 45711    | 16.22 | 111969   | 3.18199 |
| IGTSEPIGR               | Syt1     | Synaptotagmin 1, isoform H                                                | 465.256 | 2 | 15.84 | 896749   | 15.87 | 539143   | 0.78101 |
| TLSPVFNFTFFK            | Syt1     | Synaptotagmin 1, isoform H                                                | 765.896 | 2 | 45.21 | 1109199  | 44.93 | 1551467  | 1.817   |
| AAYFGFYDTAR             | sesB     | Stress-sensitive B, isoform E                                             | 641.299 | 2 | 36.23 | 8457992  | 36.06 | 4781556  | 0.73439 |
| DFAAGGISAASVSK          | sesB     | Stress-sensitive B, isoform E                                             | 597.312 | 2 | 28.61 | 8645959  | 28.51 | 9889000  | 1.4858  |
| GFGVSVQGIHYYR           | sesB     | Stress-sensitive B, isoform E                                             | 704.901 | 2 | 45.35 | 4833482  | 45.12 | 2059585  | 0.55353 |
| SDGIVGLYR               | sesB     | Stress-sensitive B, isoform E                                             | 490.264 | 2 | 28.91 | 1147390  | 28.83 | 342684   | 0.38798 |
| TAVAPIER                | sesB     | Stress-sensitive B, isoform E                                             | 428.748 | 2 | 16.27 | 5420824  | 16.21 | 2687378  | 0.644   |
| AQELWELIVK              | up       | Upheld, isoform T                                                         | 614.85  | 2 | 48.34 | 857786   | 48.15 | 594529   | 0.90036 |
| DAGVLGLSSAAMER          | up       | Upheld, isoform T                                                         | 696.843 | 2 | 30.26 | 1579477  | 30.2  | 1875543  | 1.54254 |
| IKPLAIEGFGEAK           | up       | Upheld, isoform T                                                         | 458.266 | 3 | 33.5  | 4523125  | 33.37 | 3961091  | 1.13762 |
| ISLSFR                  | up       | Upheld, isoform T                                                         | 361.713 | 2 | 30.22 | 1860854  | 30.16 | 1791066  | 1.25032 |
| ASGGPNALLPAVGK          | Hsp27    | Heat shock protein 27, isoform B                                          | 626.356 | 2 | 31.22 | 28381    | 31.28 | 8197708  | 375.221 |
| DGFQVCMDVSVQFKPNELTVK   | Hsp27    | Heat shock protein 27, isoform B                                          | 781.377 | 3 | 43.41 | 309810   | 43.2  | 1758866  | 7.37496 |
| DGFQVCMDVSVQFKPNELTVK   | Hsp27    | Heat shock protein 27, isoform B                                          | 786.708 | 3 | 39.05 | 29103    | 38.58 | 4310963  | 192.424 |
| ELDHDYR                 | Hsp27    | Heat shock protein 27, isoform B                                          | 474.215 | 2 | 10.24 | 25905    | 10.22 | 309944   | 15.5425 |
| GFDPNVSVTVSSDGVLTLLK    | Hsp27    | Heat shock protein 27, isoform B                                          | 1032.53 | 2 | 49.31 | 578434   | 48.23 | 34145948 | 76.6845 |
| GFDPNVSVTVSSDGVLTLLK    | Hsp27    | Heat shock protein 27, isoform B                                          | 688.688 | 3 | 49.28 | 243916   | 48.23 | 17596958 | 93.7173 |
| IVQIQQTGPAHLSVK         | Hsp27    | Heat shock protein 27, isoform B                                          | 809.967 | 2 | 26.16 | 0        | 26.15 | 7420055  | #DIV/0! |
| IVQIQQTGPAHLSVK         | Hsp27    | Heat shock protein 27, isoform B                                          | 540.314 | 3 | 26.32 | 125560   | 26.23 | 62417060 | 645.765 |
| LLLNTLGLGR              | Hsp27    | Heat shock protein 27, isoform B                                          | 583.866 | 2 | 42.95 | 0        | 42.98 | 26755810 | #DIV/0! |
| MSIIPLLHLAR             | Hsp27    | Heat shock protein 27, isoform B                                          | 653.389 | 2 | 60.18 | 0        | 59.42 | 2492957  | #DIV/0! |
| VVDNTVVVEGK             | Hsp27    | Heat shock protein 27, isoform B                                          | 579.822 | 2 | 18.32 | 82265    | 18.27 | 3377383  | 53.332  |
| ILPLDGLQAGYR            | norpA    | 1-phosphatidylinositol 4,5-bisphosphate phosphodiesterase (EC 3.1.4.11)   | 658.372 | 2 | 39.05 | 1848340  | 38.89 | 1619786  | 1.13841 |



|                            |        |                                                                         |         |   |       |          |       |          |         |
|----------------------------|--------|-------------------------------------------------------------------------|---------|---|-------|----------|-------|----------|---------|
| NDIEELFTSITK               | norpA  | 1-phosphatidylinositol 4,5-bisphosphate phosphodiesterase (EC 3.1.4.11) | 705.362 | 2 | 50.41 | 647218   | 50.1  | 519426   | 1.04255 |
| VVLPDLAVLR                 | norpA  | 1-phosphatidylinositol 4,5-bisphosphate phosphodiesterase (EC 3.1.4.11) | 547.85  | 2 | 45.88 | 627980   | 45.7  | 724721   | 1.49916 |
| AGFAGDDAPR                 | Act5C  | Actin 5C, isoform E                                                     | 488.728 | 2 | 15.06 | 5346544  | 15.03 | 6072874  | 1.47551 |
| AVFPSIVGRPR                | Act5C  | Actin 5C, isoform E                                                     | 599.856 | 2 | 30.18 | 3527039  | 29.97 | 6233553  | 2.29587 |
| DSYVGDEAQS                 | Act5C  | Actin 5C, isoform E                                                     | 599.765 | 2 | 11.94 | 533801   | 12.02 | 513658   | 1.25002 |
| IWHHTFYNELR                | Act5C  | Actin 5C, isoform E                                                     | 505.921 | 3 | 25.48 | 1669489  | 25.49 | 2792816  | 2.17311 |
| SYELPDGQVITIGNER           | Act5C  | Actin 5C, isoform E                                                     | 895.95  | 2 | 39.17 | 5791673  | 39    | 8517636  | 1.91046 |
| SYELPDGQVITIGNER           | Act5C  | Actin 5C, isoform E                                                     | 597.635 | 3 | 39.17 | 427938   | 38.97 | 800279   | 2.42931 |
| TTGIVLDSGDGVSHTVPIYEGYALPI | Act5C  | Actin 5C, isoform E                                                     | 1051.22 | 3 | 45.78 | 1749429  | 45.58 | 1016220  | 0.75459 |
| VAPEEHPVLLTEAPLNPK         | Act5C  | Actin 5C, isoform E                                                     | 977.536 | 2 | 34.25 | 620752   | 34.11 | 748708   | 1.56681 |
| VAPEEHPVLLTEAPLNPK         | Act5C  | Actin 5C, isoform E                                                     | 652.026 | 3 | 34.21 | 12031327 | 34.11 | 16999678 | 1.83548 |
| IEDVTPIPSDSTR              | RpS14b | GEO12513p1 (Ribosomal protein S14b, isoform B)                          | 715.362 | 2 | 24.62 | 3641721  | 24.6  | 2484539  | 0.88626 |
| TLGITALHIK                 | RpS14b | GEO12513p1 (Ribosomal protein S14b, isoform B)                          | 533.835 | 2 | 32.9  | 2242098  | 32.75 | 2243891  | 1.30008 |
| TLGITALHIK                 | RpS14b | GEO12513p1 (Ribosomal protein S14b, isoform B)                          | 356.225 | 3 | 32.86 | 2809070  | 32.75 | 2994782  | 1.38492 |
| ILEDSPNAR                  | Gs2    | Glutamine synthetase (EC 6.3.1.2)                                       | 507.764 | 2 | 13.95 | 1451117  | 13.97 | 865640   | 0.77492 |
| TLDFIPQSPK                 | Gs2    | Glutamine synthetase (EC 6.3.1.2)                                       | 573.314 | 2 | 33.87 | 1671981  | 33.68 | 1493163  | 1.16011 |
| YLSLPLQENIVQATYVWIDGTGEDL  | Gs2    | Glutamine synthetase (EC 6.3.1.2)                                       | 998.513 | 3 | 65.64 | 539196   | 65.12 | 224891   | 0.54181 |
| AVYAHFPIVCVTSENNTVIEIR     | Rpl9   | Ribosomal protein L9, isoform C                                         | 849.76  | 3 | 40.81 | 1781795  | 40.62 | 1413499  | 1.03053 |
| FLDGLYVSEK                 | Rpl9   | Ribosomal protein L9, isoform C                                         | 585.806 | 2 | 35.92 | 3763738  | 35.78 | 4648290  | 1.60434 |
| GVTFGFQYK                  | Rpl9   | Ribosomal protein L9, isoform C                                         | 523.769 | 2 | 33.76 | 1916061  | 33.65 | 1180316  | 0.80022 |
| TVCSHIENMIK                | Rpl9   | Ribosomal protein L9, isoform C                                         | 666.326 | 2 | 25.86 | 3049601  | 26.46 | 614101   | 0.26159 |
| VVTITGTR                   | Rpl9   | Ribosomal protein L9, isoform C                                         | 423.756 | 2 | 16.63 | 6749408  | 16.64 | 3559419  | 0.68507 |
| VYSPHVLNLTLDLPLGLTK        | shi    | Shibire, isoform P                                                      | 698.405 | 3 | 53.41 | 463587   | 53.25 | 477207   | 1.3372  |
| AFIVKPIPSPEVIPVIVFINPK     | rdgA   | Diacylglycerol kinase (DAG kinase) (EC 2.7.1.107)                       | 806.491 | 3 | 58.34 | 7861730  | 58.25 | 6537246  | 1.08019 |
| AFIVKPIPSPEVIPVIVFINPK     | rdgA   | Diacylglycerol kinase (DAG kinase) (EC 2.7.1.107)                       | 605.12  | 4 | 58.3  | 339552   | 58.29 | 268976   | 1.02903 |
| FEESISYPK                  | rdgA   | Diacylglycerol kinase (DAG kinase) (EC 2.7.1.107)                       | 550.269 | 2 | 25.08 | 699628   | 25.06 | 249796   | 0.46381 |
| FQHLLNPR                   | rdgA   | Diacylglycerol kinase (DAG kinase) (EC 2.7.1.107)                       | 512.788 | 2 | 19.99 | 2182798  | 19.93 | 880908   | 0.52425 |
| GDVQVNPLEK                 | rdgA   | Diacylglycerol kinase (DAG kinase) (EC 2.7.1.107)                       | 549.793 | 2 | 22.75 | 2434720  | 22.76 | 798326   | 0.42595 |
| LGNYAPIVPPSWIVK            | rdgA   | Diacylglycerol kinase (DAG kinase) (EC 2.7.1.107)                       | 884.014 | 2 | 52.63 | 3322956  | 52.44 | 1330008  | 0.51994 |
| QVFDLTQGGPK                | rdgA   | Diacylglycerol kinase (DAG kinase) (EC 2.7.1.107)                       | 595.314 | 2 | 28.22 | 3580063  | 28.2  | 2623698  | 0.95202 |
| SFAAFSQR                   | rdgA   | Diacylglycerol kinase (DAG kinase) (EC 2.7.1.107)                       | 457.23  | 2 | 23.28 | 6655876  | 23.37 | 6106585  | 1.19183 |
| TIPMQVDGEACR               | rdgA   | Diacylglycerol kinase (DAG kinase) (EC 2.7.1.107)                       | 688.818 | 2 | 23.21 | 1029594  | 23.29 | 655361   | 0.82687 |
| TIPMQVDGEACR               | rdgA   | Diacylglycerol kinase (DAG kinase) (EC 2.7.1.107)                       | 696.816 | 2 | 17.7  | 628084   | 17.41 | 337537   | 0.69811 |
| VKPSVIEIELLNK              | rdgA   | Diacylglycerol kinase (DAG kinase) (EC 2.7.1.107)                       | 741.451 | 2 | 38.07 | 1106361  | 37.96 | 617198   | 0.72469 |
| VKPSVIEIELLNK              | rdgA   | Diacylglycerol kinase (DAG kinase) (EC 2.7.1.107)                       | 494.636 | 3 | 38.07 | 3645006  | 37.92 | 2591446  | 0.92356 |
| VSQDWCFIDSCAEHYFR          | rdgA   | Diacylglycerol kinase (DAG kinase) (EC 2.7.1.107)                       | 774.33  | 3 | 41.88 | 500902   | 41.72 | 464633   | 1.20498 |
| VTPNDDVTDDHVDR             | rdgA   | Diacylglycerol kinase (DAG kinase) (EC 2.7.1.107)                       | 533.241 | 3 | 14.64 | 1483070  | 14.56 | 900190   | 0.78849 |
| LGAGAGTGYPYNTNTR           | CG2157 | Uncharacterized protein, isoform B                                      | 780.876 | 2 | 24.59 | 230436   | 24.56 | 514144   | 2.89839 |
| AFIVKPIPSPEVIPVIVFINPK     | rdgA   | Diacylglycerol kinase (DAG kinase) (EC 2.7.1.107)                       | 806.491 | 3 | 58.34 | 7861730  | 58.25 | 6537246  | 1.08019 |
| AFIVKPIPSPEVIPVIVFINPK     | rdgA   | Diacylglycerol kinase (DAG kinase) (EC 2.7.1.107)                       | 605.12  | 4 | 58.3  | 339552   | 58.29 | 268976   | 1.02903 |
| FEESISYPK                  | rdgA   | Diacylglycerol kinase (DAG kinase) (EC 2.7.1.107)                       | 550.269 | 2 | 25.08 | 699628   | 25.06 | 249796   | 0.46381 |
| FQHLLNPR                   | rdgA   | Diacylglycerol kinase (DAG kinase) (EC 2.7.1.107)                       | 512.788 | 2 | 19.99 | 2182798  | 19.93 | 880908   | 0.52425 |
| GDVQVNPLEK                 | rdgA   | Diacylglycerol kinase (DAG kinase) (EC 2.7.1.107)                       | 549.793 | 2 | 22.75 | 2434720  | 22.76 | 798326   | 0.42595 |
| LGNYAPIVPPSWIVK            | rdgA   | Diacylglycerol kinase (DAG kinase) (EC 2.7.1.107)                       | 884.014 | 2 | 52.63 | 3322956  | 52.44 | 1330008  | 0.51994 |
| QVFDLTQGGPK                | rdgA   | Diacylglycerol kinase (DAG kinase) (EC 2.7.1.107)                       | 595.314 | 2 | 28.22 | 3580063  | 28.2  | 2623698  | 0.95202 |
| SFAAFSQR                   | rdgA   | Diacylglycerol kinase (DAG kinase) (EC 2.7.1.107)                       | 457.23  | 2 | 23.28 | 6655876  | 23.37 | 6106585  | 1.19183 |
| TIPMQVDGEACR               | rdgA   | Diacylglycerol kinase (DAG kinase) (EC 2.7.1.107)                       | 688.818 | 2 | 23.21 | 1029594  | 23.29 | 655361   | 0.82687 |
| TIPMQVDGEACR               | rdgA   | Diacylglycerol kinase (DAG kinase) (EC 2.7.1.107)                       | 696.816 | 2 | 17.7  | 628084   | 17.41 | 337537   | 0.69811 |
| VKPSVIEIELLNK              | rdgA   | Diacylglycerol kinase (DAG kinase) (EC 2.7.1.107)                       | 741.451 | 2 | 38.07 | 1106361  | 37.96 | 617198   | 0.72469 |
| VKPSVIEIELLNK              | rdgA   | Diacylglycerol kinase (DAG kinase) (EC 2.7.1.107)                       | 494.636 | 3 | 38.07 | 3645006  | 37.92 | 2591446  | 0.92356 |
| VSQDWCFIDSCAEHYFR          | rdgA   | Diacylglycerol kinase (DAG kinase) (EC 2.7.1.107)                       | 774.33  | 3 | 41.88 | 500902   | 41.72 | 464633   | 1.20498 |
| VTPNDDVTDDHVDR             | rdgA   | Diacylglycerol kinase (DAG kinase) (EC 2.7.1.107)                       | 533.241 | 3 | 14.64 | 1483070  | 14.56 | 900190   | 0.78849 |
| AQPGFGEDEVITVLTGLPK        | Yp3    | Yolk protein 3, isoform B (EC 3.1.1.-) (EC 3.1.1.1)                     | 986.025 | 2 | 50.78 | 511312   | 50.51 | 698432   | 1.77444 |

|                           |           |                                                                              |         |   |       |         |       |          |         |
|---------------------------|-----------|------------------------------------------------------------------------------|---------|---|-------|---------|-------|----------|---------|
| YFAESVRPGSER              | Yp3       | Yolk protein 3, isoform B (EC 3.1.1.-) (EC 3.1.1.1)                          | 466.565 | 3 | 18.27 | 878476  | 18.27 | 1290612  | 1.90848 |
| DYGVLDDEETGIPFR           | Jafrac1   | Thioredoxin peroxidase 1, isoform C (Thioredoxin peroxidase 1, isoform D) (E | 805.888 | 2 | 42.29 | 1389123 | 42.06 | 1525411  | 1.42649 |
| SVEETLR                   | Jafrac1   | Thioredoxin peroxidase 1, isoform C (Thioredoxin peroxidase 1, isoform D) (E | 417.222 | 2 | 14.57 | 798318  | 14.56 | 716777   | 1.16635 |
| EAIVPFVPIFVEEADVIQGAK     | eas       | Easily shocked, isoform J (EC 2.7.1.32) (EC 2.7.1.82)                        | 757.747 | 3 | 63.84 | 23869   | 61.84 | 116025   | 6.31451 |
| LVTAIDEADLAR              | eIF2alpha | Eukaryotic translation initiation factor 2 subunit alpha, isoform B          | 643.851 | 2 | 31.83 | 315858  | 31.67 | 469918   | 1.93265 |
| AEQVVSQLSSDGLTVSIPKQAVE   | Hsp26     | Heat shock protein 26, isoform B                                             | 942.169 | 3 | 41.6  | 19465   | 41.36 | 1034803  | 69.0598 |
| DGFQVCMQVAFKPKSELNVK      | Hsp26     | Heat shock protein 26, isoform B                                             | 771.373 | 3 | 44.11 | 213799  | 44.1  | 1638807  | 9.95737 |
| DGFQVCMQVAFKPKSELNVK      | Hsp26     | Heat shock protein 26, isoform B                                             | 776.705 | 3 | 39.94 | 53212   | 39.69 | 2583608  | 63.0724 |
| IIQIQVVGPAHLNVK           | Hsp26     | Heat shock protein 26, isoform B                                             | 829.491 | 2 | 32.72 | 98730   | 32.53 | 9251943  | 121.732 |
| IIQIQVVGPAHLNVK           | Hsp26     | Heat shock protein 26, isoform B                                             | 553.33  | 3 | 32.72 | 645047  | 32.53 | 78215392 | 157.515 |
| MSLSTLLSLVDELQEPR         | Hsp26     | Heat shock protein 26, isoform B                                             | 644.343 | 3 | 65.46 | 0       | 65.23 | 11197    | #DIV/0! |
| NDIHWPATAHVGK             | Hsp26     | Heat shock protein 26, isoform B                                             | 482.581 | 3 | 20.47 | 18499   | 23.18 | 478607   | 33.6088 |
| SPIYELGLGLPHSR            | Hsp26     | Heat shock protein 26, isoform B                                             | 838.449 | 2 | 33.39 | 144972  | 33.4  | 4457974  | 39.9462 |
| SPIYELGLGLPHSR            | Hsp26     | Heat shock protein 26, isoform B                                             | 559.302 | 3 | 33.64 | 373200  | 33.4  | 49626936 | 172.742 |
| SPIYELGLGLPHSR            | Hsp26     | Heat shock protein 26, isoform B                                             | 419.728 | 4 | 33.54 | 257619  | 33.4  | 45925152 | 231.577 |
| VVDDSIILVEGK              | Hsp26     | Heat shock protein 26, isoform B                                             | 587.322 | 2 | 27.24 | 288145  | 27.53 | 4657387  | 20.9968 |
| YVLPLGTQQR                | Hsp26     | Heat shock protein 26, isoform B                                             | 587.833 | 2 | 30.91 | 472461  | 30.72 | 95333624 | 262.121 |
| DSQGHVFAATR               | RpS4      | 40S ribosomal protein S4                                                     | 373.184 | 3 | 13.5  | 848798  | 13.47 | 498993   | 0.76368 |
| ESLPLLIIFLR               | RpS4      | 40S ribosomal protein S4                                                     | 600.871 | 2 | 59.87 | 978242  | 59.6  | 249332   | 0.3311  |
| GNKPYISLPK                | RpS4      | 40S ribosomal protein S4                                                     | 372.885 | 3 | 24.24 | 1063638 | 24.28 | 968662   | 1.18304 |
| GVPFLVTHDGR               | RpS4      | 40S ribosomal protein S4                                                     | 599.322 | 2 | 29.44 | 2161831 | 29.36 | 2769935  | 1.66445 |
| LGGVFAPRPSTGPHK           | RpS4      | 40S ribosomal protein S4                                                     | 507.616 | 3 | 20.14 | 336675  | 20.13 | 222325   | 0.85783 |
| LGGVFAPRPSTGPHK           | RpS4      | 40S ribosomal protein S4                                                     | 380.964 | 4 | 20.18 | 928142  | 20.13 | 480847   | 0.673   |
| LSIAEER                   | RpS4      | 40S ribosomal protein S4                                                     | 409.224 | 2 | 17.33 | 1731761 | 17.37 | 1338598  | 1.00412 |
| LTNVFIIGK                 | RpS4      | 40S ribosomal protein S4                                                     | 502.811 | 2 | 37.72 | 3811188 | 37.56 | 3884472  | 1.32402 |
| TGEFFR                    | RpS4      | 40S ribosomal protein S4                                                     | 378.687 | 2 | 22.32 | 2231185 | 22.28 | 2138263  | 1.24494 |
| VGTVVNR                   | RpS4      | 40S ribosomal protein S4                                                     | 372.722 | 2 | 10.66 | 487079  | 10.77 | 324263   | 0.86481 |
| FLSQPFQVAEFTGHAGK         | ATPsynb   | ATP synthase subunit beta (EC 7.1.2.2)                                       | 655.007 | 3 | 47.1  | 661096  | 46.95 | 927753   | 1.82301 |
| LVLEVAQHLGENTVR           | ATPsynb   | ATP synthase subunit beta (EC 7.1.2.2)                                       | 839.468 | 2 | 34.87 | 556208  | 34.71 | 748475   | 1.74808 |
| ILEDSPNAR                 | Gs2       | Glutamine synthetase (EC 6.3.1.2)                                            | 507.764 | 2 | 13.95 | 1451117 | 13.97 | 865640   | 0.77492 |
| TLDIFQPSPK                | Gs2       | Glutamine synthetase (EC 6.3.1.2)                                            | 573.314 | 2 | 33.87 | 1671981 | 33.68 | 1493163  | 1.16011 |
| YLSLPLQENIVQATYVWIDGTGEDL | Gs2       | Glutamine synthetase (EC 6.3.1.2)                                            | 998.513 | 3 | 65.64 | 539196  | 65.12 | 224891   | 0.54181 |
| AQCPIVER                  | RpS5a     | Ribosomal protein S5a, isoform B (Ribosomal protein S5a, isoform C) (Ribosc  | 486.75  | 2 | 14.71 | 806831  | 14.72 | 445526   | 0.71732 |
| QAVDVSPLR                 | RpS5a     | Ribosomal protein S5a, isoform B (Ribosomal protein S5a, isoform C) (Ribosc  | 492.777 | 2 | 23.02 | 630384  | 23.02 | 403036   | 0.83054 |
| TIAECLADELINAAK           | RpS5a     | Ribosomal protein S5a, isoform B (Ribosomal protein S5a, isoform C) (Ribosc  | 816.419 | 2 | 52.59 | 3303911 | 52.37 | 1805891  | 0.71004 |
| TIAECLADELINAAK           | RpS5a     | Ribosomal protein S5a, isoform B (Ribosomal protein S5a, isoform C) (Ribosc  | 544.615 | 3 | 52.55 | 1853788 | 52.37 | 881679   | 0.61784 |
| WSCDDVTVNDISLQDYISVK      | RpS5a     | Ribosomal protein S5a, isoform B (Ribosomal protein S5a, isoform C) (Ribosc  | 1179.05 | 2 | 47.03 | 482748  | 46.74 | 433432   | 1.16633 |

**Supplementary Table 3** CoRest-C binding sites

The regions indicated by 'Start' and 'End' represent the called peak region.

The results of the peak-calling are indicated as 'Q score' and 'Fold enrichment'.

'Gene Symbol' indicates the annotated genes overlapped with the peaks, or most closely located to the peaks.

| Chromosome | Start   | End     | Gene Symbol        | Distance from the center of the peaks to TSS (bp) | Q score (-log <sub>10</sub> (q value)) | Fold change | Located within 500 bp from the CBP-peaks | Located within 500 bp from the Rpd3-peaks |
|------------|---------|---------|--------------------|---------------------------------------------------|----------------------------------------|-------------|------------------------------------------|-------------------------------------------|
| chr2L      | 18218   | 19017   | l(2)gl             | 159                                               | 6.36773                                | 3.80        | -                                        | -                                         |
| chr2L      | 128989  | 129432  | CG3164             | 62                                                | 13.0863                                | 5.43        | +                                        | +                                         |
| chr2L      | 155007  | 155694  | ND-15              | 97                                                | 4.51847                                | 3.31        | -                                        | -                                         |
| chr2L      | 160626  | 161623  | spen               | 1848                                              | 7.51194                                | 4.27        | +                                        | +                                         |
| chr2L      | 221993  | 222545  | kis                | 134                                               | 7.25765                                | 4.27        | +                                        | -                                         |
| chr2L      | 277160  | 277654  | CG17078            | 95                                                | 4.72558                                | 3.33        | +                                        | +                                         |
| chr2L      | 377861  | 378197  | al                 | 69                                                | 9.607                                  | 5.58        | +                                        | +                                         |
| chr2L      | 403954  | 404242  | Rpl135             | 163                                               | 4.81534                                | 3.38        | -                                        | -                                         |
| chr2L      | 414933  | 415214  | ebi                | 22                                                | 8.60204                                | 4.55        | +                                        | +                                         |
| chr2L      | 478770  | 480420  | cbt                | 602                                               | 5.62584                                | 3.34        | +                                        | +                                         |
| chr2L      | 490145  | 490499  | ush                | 540                                               | 11.3163                                | 5.26        | +                                        | -                                         |
| chr2L      | 490145  | 490499  | CR46258            | 540                                               | 11.3163                                | 5.26        | +                                        | -                                         |
| chr2L      | 735498  | 735952  | Eaat2              | 6093                                              | 9.14311                                | 5.14        | +                                        | -                                         |
| chr2L      | 739959  | 740386  | Eaat2              | 1557                                              | 19.8868                                | 8.23        | -                                        | -                                         |
| chr2L      | 850788  | 851212  | drongo             | 19                                                | 10.4357                                | 5.31        | +                                        | +                                         |
| chr2L      | 865457  | 866512  | 3noRNA:Me28S-U123( | 314                                               | 5.42437                                | 3.75        | +                                        | +                                         |
| chr2L      | 865457  | 866512  | aru                | 54                                                | 5.42437                                | 3.75        | +                                        | +                                         |
| chr2L      | 866781  | 867498  | aru                | 705                                               | 4.95707                                | 3.36        | +                                        | +                                         |
| chr2L      | 870495  | 871690  | PNUTS              | 70                                                | 7.88864                                | 4.21        | +                                        | -                                         |
| chr2L      | 1118777 | 1119198 | Pino               | 5                                                 | 7.68006                                | 4.23        | +                                        | +                                         |
| chr2L      | 1157722 | 1158051 | capt               | 329                                               | 5.20345                                | 3.22        | +                                        | +                                         |
| chr2L      | 1185971 | 1186370 | CG5001             | 74                                                | 5.69393                                | 3.91        | +                                        | -                                         |
| chr2L      | 1611091 | 1611486 | CG31935            | 259                                               | 6.13669                                | 3.79        | -                                        | +                                         |
| chr2L      | 1611091 | 1611486 | CG14352            | 7                                                 | 6.13669                                | 3.79        | -                                        | +                                         |
| chr2L      | 1714402 | 1714801 | frtz               | 1220                                              | 5.91102                                | 3.91        | +                                        | +                                         |
| chr2L      | 1723699 | 1724530 | Rim2               | 62                                                | 6.36773                                | 3.92        | +                                        | +                                         |
| chr2L      | 1728507 | 1728829 | Rrp40              | 6                                                 | 4.10003                                | 3.15        | +                                        | -                                         |
| chr2L      | 1729665 | 1730023 | CG31937            | 54                                                | 6.87287                                | 3.95        | +                                        | -                                         |
| chr2L      | 1911363 | 1911876 | CG7337             | 82                                                | 6.07228                                | 3.88        | +                                        | +                                         |
| chr2L      | 2009614 | 2010016 | CG4238             | 93                                                | 11.246                                 | 5.23        | +                                        | -                                         |
| chr2L      | 2037562 | 2038242 | Su(dx)             | 8                                                 | 4.74497                                | 3.15        | +                                        | +                                         |
| chr2L      | 2162575 | 2163021 | aop                | 1202                                              | 4.53832                                | 3.32        | +                                        | -                                         |
| chr2L      | 2168859 | 2169278 | aop                | 7442                                              | 5.4164                                 | 3.87        | +                                        | +                                         |
| chr2L      | 2192255 | 2192536 | CG10874            | 43                                                | 5.87999                                | 3.46        | -                                        | +                                         |
| chr2L      | 2193271 | 2193918 | CG34172            | 748                                               | 13.5869                                | 5.79        | +                                        | +                                         |
| chr2L      | 2196402 | 2197363 | CG34172            | 730                                               | 13.2231                                | 5.21        | +                                        | +                                         |
| chr2L      | 2200073 | 2200620 | CG34172            | 2462                                              | 10.1441                                | 5.01        | +                                        | +                                         |
| chr2L      | 2202075 | 2203628 | CG31668            | 2806                                              | 24.5937                                | 7.85        | +                                        | +                                         |
| chr2L      | 2221901 | 2222306 | papi               | 41                                                | 4.14378                                | 3.08        | +                                        | +                                         |
| chr2L      | 2362885 | 2363598 | Rab5               | 475                                               | 4.06253                                | 3.04        | +                                        | +                                         |
| chr2L      | 2374485 | 2374924 | CG3609             | 41                                                | 9.10259                                | 4.29        | +                                        | +                                         |
| chr2L      | 2374485 | 2374924 | CG15390            | 44                                                | 9.10259                                | 4.29        | +                                        | +                                         |
| chr2L      | 2376179 | 2376591 | Atxn7              | 71                                                | 26.9117                                | 8.77        | +                                        | +                                         |
| chr2L      | 2428238 | 2428797 | dpp                | 166                                               | 6.13849                                | 4.18        | +                                        | +                                         |
| chr2L      | 2492567 | 2493182 | Slh                | 116                                               | 5.34846                                | 3.21        | +                                        | +                                         |
| chr2L      | 2492567 | 2493182 | oaf                | 167                                               | 5.34846                                | 3.21        | +                                        | +                                         |
| chr2L      | 2769937 | 2770305 | colt               | 30                                                | 5.4164                                 | 3.51        | -                                        | -                                         |
| chr2L      | 2769937 | 2770305 | CG2862             | 98                                                | 5.4164                                 | 3.51        | -                                        | -                                         |

|       |         |         |            |       |         |      |   |   |
|-------|---------|---------|------------|-------|---------|------|---|---|
| chr2L | 2874348 | 2875048 | CG31694    | 7     | 6.32122 | 4.02 | + | + |
| chr2L | 2874348 | 2875048 | CG8814     | 407   | 6.32122 | 4.02 | + | + |
| chr2L | 2878212 | 2878586 | Prx6005    | 102   | 8.00356 | 4.04 | - | + |
| chr2L | 2878212 | 2878586 | CG31950    | 9     | 8.00356 | 4.04 | - | + |
| chr2L | 2878931 | 2879286 | betaggt-II | 3     | 12.4006 | 5.29 | - | + |
| chr2L | 2884991 | 2885350 | NTPase     | 40    | 6.02165 | 3.85 | + | + |
| chr2L | 2885690 | 2886015 | NTPase     | 13    | 7.94962 | 4.36 | + | + |
| chr2L | 2885690 | 2886015 | lilli      | 91    | 7.94962 | 4.36 | + | + |
| chr2L | 3465994 | 3466548 | msl-2      | 93    | 9.69613 | 5.10 | - | + |
| chr2L | 3465994 | 3466548 | ND-PDSW    | 49    | 9.69613 | 5.10 | - | + |
| chr2L | 3662332 | 3662706 | CG34340    | 242   | 4.37187 | 3.13 | + | - |
| chr2L | 3713037 | 3713455 | CG31955    | 24    | 5.3399  | 3.70 | + | + |
| chr2L | 3713037 | 3713455 | CG2818     | 230   | 5.3399  | 3.70 | + | + |
| chr2L | 3771731 | 3772342 | bowl       | 40    | 10.6764 | 5.43 | + | + |
| chr2L | 3772842 | 3773195 | bowl       | 970   | 6.15777 | 4.35 | + | - |
| chr2L | 3778612 | 3778870 | bowl       | 169   | 5.64314 | 4.01 | + | - |
| chr2L | 3786256 | 3787213 | bark       | 75    | 8.45273 | 4.92 | + | - |
| chr2L | 3872290 | 3872743 | CG31957    | 57    | 7.72842 | 4.38 | - | + |
| chr2L | 4187680 | 4188001 | CG31961    | 12    | 5.32495 | 3.37 | - | - |
| chr2L | 4221419 | 4221890 | ft         | 44    | 4.82013 | 3.39 | + | - |
| chr2L | 4333187 | 4333468 | Atet       | 584   | 7.88864 | 4.09 | + | + |
| chr2L | 4333740 | 4334230 | Atet       | 78    | 9.3363  | 5.24 | + | + |
| chr2L | 4340184 | 4340806 | Atet       | 1602  | 5.34846 | 3.59 | + | - |
| chr2L | 4448719 | 4449024 | MFS18      | 227   | 8.01306 | 4.84 | - | - |
| chr2L | 4458094 | 4458416 | RpL27A     | 100   | 4.59498 | 3.16 | - | + |
| chr2L | 4594819 | 4595216 | dpy        | 64    | 12.9819 | 5.69 | + | + |
| chr2L | 4614143 | 4614869 | dpy        | 216   | 5.3399  | 3.70 | + | + |
| chr2L | 4810169 | 4810731 | CR45297    | 1729  | 5.54211 | 4.46 | + | + |
| chr2L | 4811434 | 4812046 | CR45297    | 94    | 8.67696 | 4.46 | + | + |
| chr2L | 4973794 | 4974248 | l(2)05714  | 115   | 10.9463 | 5.57 | - | + |
| chr2L | 4973794 | 4974248 | mRpL28     | 61    | 10.9463 | 5.57 | - | + |
| chr2L | 5000254 | 5000531 | Rtnl1      | 72    | 4.49913 | 3.30 | + | - |
| chr2L | 5001158 | 5001609 | Rtnl1      | 905   | 5.4978  | 3.85 | + | - |
| chr2L | 5009694 | 5009961 | Rtnl1      | 11    | 5.12257 | 3.18 | + | + |
| chr2L | 5054789 | 5055792 | CG14036    | 306   | 5.70738 | 3.57 | - | - |
| chr2L | 5054789 | 5055792 | His3.3A    | 189   | 5.70738 | 3.57 | - | - |
| chr2L | 5096204 | 5096517 | CG4230     | 4     | 13.0888 | 6.09 | + | + |
| chr2L | 5099788 | 5100323 | ND-13A     | 4     | 9.12391 | 4.67 | - | - |
| chr2L | 5108337 | 5108607 | Msp300     | 42    | 7.29631 | 4.43 | + | + |
| chr2L | 5301284 | 5301545 | vri        | 1797  | 4.67589 | 3.84 | + | - |
| chr2L | 5325111 | 5325764 | CR44985    | 1251  | 5.92284 | 3.80 | + | + |
| chr2L | 5326410 | 5326880 | CR44985    | 247   | 7.09668 | 4.18 | + | + |
| chr2L | 5326410 | 5326880 | Ncoa6      | 67    | 7.09668 | 4.18 | + | + |
| chr2L | 5441342 | 5441666 | CR31647    | 2173  | 5.12257 | 3.96 | - | - |
| chr2L | 5799392 | 5800412 | CG9171     | 39    | 6.59913 | 3.92 | + | + |
| chr2L | 5805242 | 5805506 | CG11034    | 26    | 7.32245 | 4.17 | + | - |
| chr2L | 5835464 | 5835721 | TrissinR   | 10847 | 5.83689 | 3.54 | - | - |
| chr2L | 5907669 | 5908055 | bchs       | 617   | 6.44534 | 3.54 | + | - |
| chr2L | 5977314 | 5977827 | chic       | 2449  | 5.09715 | 3.55 | + | - |
| chr2L | 5981461 | 5982205 | eIF-4a     | 55    | 6.90281 | 3.96 | + | + |
| chr2L | 5986238 | 5986942 | ifc        | 35    | 6.48358 | 4.11 | - | + |
| chr2L | 6037648 | 6038336 | CG9117     | 104   | 6.147   | 3.69 | - | - |
| chr2L | 6037648 | 6038336 | CG31643    | 318   | 6.147   | 3.69 | - | - |
| chr2L | 6078767 | 6079435 | CR9162     | 743   | 11.1032 | 5.02 | + | + |
| chr2L | 6098887 | 6099303 | CG9175     | 59    | 12.5821 | 5.52 | + | + |
| chr2L | 6341622 | 6341945 | Cpr        | 5     | 5.79011 | 3.84 | + | - |
| chr2L | 6480055 | 6481048 | Sec61alpha | 325   | 19.1246 | 7.23 | + | + |
| chr2L | 6480055 | 6481048 | Daxx       | 28    | 19.1246 | 7.23 | + | + |

|       |          |          |          |      |         |      |   |   |
|-------|----------|----------|----------|------|---------|------|---|---|
| chr2L | 6480055  | 6481048  | CR45463  | 30   | 19.1246 | 7.23 | + | + |
| chr2L | 6491037  | 6491307  | CG31638  | 53   | 6.44806 | 3.96 | + | + |
| chr2L | 6610764  | 6611119  | CG11050  | 27   | 10.7722 | 4.63 | + | - |
| chr2L | 6612561  | 6613024  | CG11050  | 1214 | 4.97726 | 3.19 | + | + |
| chr2L | 6684048  | 6684619  | Nhe3     | 42   | 8.00112 | 4.67 | + | + |
| chr2L | 6787262  | 6787949  | nrv1     | 602  | 19.7228 | 7.48 | + | + |
| chr2L | 6918591  | 6918877  | nop5     | 54   | 5.09715 | 3.34 | + | + |
| chr2L | 7010002  | 7010457  | uif      | 194  | 6.57672 | 4.30 | + | - |
| chr2L | 7042081  | 7042519  | milt     | 67   | 13.1724 | 5.46 | + | - |
| chr2L | 7306803  | 7307187  | wg       | 172  | 6.13849 | 3.92 | + | - |
| chr2L | 7437363  | 7438363  | CG5973   | 31   | 7.42025 | 3.88 | + | + |
| chr2L | 7438941  | 7439338  | CG5973   | 1616 | 5.06525 | 3.77 | - | - |
| chr2L | 7496212  | 7496567  | Ziz      | 40   | 6.61493 | 3.71 | + | + |
| chr2L | 7701451  | 7701761  | Tep2     | 17   | 6.92889 | 4.51 | + | + |
| chr2L | 7702676  | 7702972  | Tep3     | 34   | 11.0516 | 5.29 | + | + |
| chr2L | 7809435  | 7810072  | cdc14    | 882  | 8.44855 | 4.35 | + | + |
| chr2L | 7827798  | 7828904  | mts      | 556  | 11.5371 | 4.94 | + | + |
| chr2L | 7879109  | 7879761  | spz3     | 273  | 4.89568 | 3.54 | + | - |
| chr2L | 7973637  | 7973921  | Snoo     | 3338 | 4.29296 | 3.28 | + | - |
| chr2L | 7998697  | 7999171  | Sirup    | 30   | 11.8109 | 5.49 | + | + |
| chr2L | 8042644  | 8042938  | RpL36A   | 1    | 8.09036 | 4.43 | - | + |
| chr2L | 8156782  | 8157061  | PAPLA1   | 220  | 7.52433 | 4.56 | - | - |
| chr2L | 8196966  | 8197433  | CG8460   | 16   | 8.28003 | 4.83 | - | - |
| chr2L | 8307954  | 8308220  | Ostgamma | 141  | 7.44239 | 4.51 | - | + |
| chr2L | 8370384  | 8371068  | CG17292  | 29   | 9.59942 | 5.21 | + | + |
| chr2L | 8370384  | 8371068  | CR45341  | 112  | 9.59942 | 5.21 | + | + |
| chr2L | 8403398  | 8403732  | emb      | 48   | 14.0562 | 5.99 | + | + |
| chr2L | 8415224  | 8416023  | CG13398  | 449  | 9.18539 | 5.16 | + | + |
| chr2L | 8415224  | 8416023  | Akap200  | 16   | 9.18539 | 5.16 | + | + |
| chr2L | 8449468  | 8449739  | U26      | 26   | 4.54899 | 3.56 | - | - |
| chr2L | 8478069  | 8478954  | d        | 503  | 5.56959 | 3.71 | + | - |
| chr2L | 8685914  | 8686347  | PrBP     | 124  | 5.22851 | 3.63 | - | - |
| chr2L | 8685914  | 8686347  | Trs23    | 151  | 5.22851 | 3.63 | - | - |
| chr2L | 8699573  | 8700191  | Hnf4     | 192  | 5.79011 | 3.84 | + | - |
| chr2L | 8709049  | 8709586  | Hnf4     | 203  | 8.37142 | 4.58 | + | + |
| chr2L | 8888293  | 8889093  | CR44415  | 952  | 4.3399  | 3.42 | - | - |
| chr2L | 9387628  | 9387900  | Aldh     | 227  | 6.96551 | 4.54 | + | + |
| chr2L | 9430875  | 9431434  | FucTB    | 51   | 6.96551 | 4.54 | - | + |
| chr2L | 9430875  | 9431434  | scat     | 403  | 6.96551 | 4.54 | - | + |
| chr2L | 9570192  | 9570490  | CG3838   | 55   | 6.84115 | 4.05 | + | - |
| chr2L | 9678859  | 9679229  | CR44150  | 7949 | 4.66658 | 3.64 | - | - |
| chr2L | 9699065  | 9699541  | Pka-C1   | 52   | 13.3765 | 5.40 | + | + |
| chr2L | 9790633  | 9790969  | CG4036   | 2    | 5.18403 | 3.39 | + | + |
| chr2L | 9947377  | 9947770  | CG5853   | 72   | 7.91708 | 4.78 | + | + |
| chr2L | 10143217 | 10143979 | CG4839   | 1367 | 25.1733 | 9.47 | + | - |
| chr2L | 10246973 | 10247249 | chico    | 12   | 8.60204 | 4.55 | + | - |
| chr2L | 10334796 | 10335240 | GATAd    | 1167 | 8.32052 | 4.70 | + | + |
| chr2L | 10506527 | 10507521 | Myo31DF  | 101  | 15.5151 | 6.45 | + | + |
| chr2L | 10506527 | 10507521 | CG6094   | 200  | 15.5151 | 6.45 | + | + |
| chr2L | 10661432 | 10662128 | CG31871  | 474  | 17.4485 | 7.77 | + | - |
| chr2L | 10841971 | 10842626 | CG6700   | 179  | 6.48117 | 3.86 | + | + |
| chr2L | 10976187 | 10976527 | ATPsynG  | 12   | 11.0314 | 5.61 | + | + |
| chr2L | 11004093 | 11004428 | RpL9     | 36   | 10.6791 | 5.80 | - | + |
| chr2L | 11106439 | 11106964 | Reps     | 170  | 5.05193 | 3.42 | + | + |
| chr2L | 11106439 | 11106964 | l(2)gd1  | 127  | 5.05193 | 3.42 | + | + |
| chr2L | 11155642 | 11155948 | CG6287   | 0    | 7.36908 | 4.33 | + | + |
| chr2L | 11806300 | 11808218 | crol     | 1119 | 10.3493 | 4.97 | + | + |
| chr2L | 11808765 | 11809331 | crol     | 128  | 5.20345 | 3.22 | + | + |

|       |          |          |                  |       |         |      |   |   |
|-------|----------|----------|------------------|-------|---------|------|---|---|
| chr2L | 11948536 | 11948942 | CG16964          | 757   | 7.41602 | 3.98 | + | - |
| chr2L | 11970870 | 11971358 | CR43314          | 32    | 9.92817 | 5.22 | + | + |
| chr2L | 12003029 | 12003839 | CG6746           | 1377  | 7.41602 | 3.98 | + | + |
| chr2L | 12004208 | 12005015 | CG6746           | 2419  | 8.08878 | 4.57 | + | + |
| chr2L | 12005382 | 12006092 | Rh5              | 2640  | 10.2459 | 5.22 | + | + |
| chr2L | 12007022 | 12007837 | Rh5              | 602   | 11.9097 | 4.72 | + | + |
| chr2L | 12010219 | 12011178 | Rh5              | 2136  | 14.959  | 5.73 | + | + |
| chr2L | 12025303 | 12025645 | CR44587          | 204   | 7.21477 | 4.69 | + | + |
| chr2L | 12044721 | 12046297 | CG6785           | 750   | 12.7778 | 5.60 | + | + |
| chr2L | 12044721 | 12046297 | CG6770           | 168   | 12.7778 | 5.60 | + | + |
| chr2L | 12055692 | 12056427 | Jhl-21           | 32    | 9.67914 | 5.43 | + | + |
| chr2L | 12055692 | 12056427 | RpL7-like        | 408   | 9.67914 | 5.43 | + | + |
| chr2L | 12055692 | 12056427 | CG34164          | 430   | 9.67914 | 5.43 | + | + |
| chr2L | 12055692 | 12056427 | RpL7-like        | 430   | 9.67914 | 5.43 | + | + |
| chr2L | 12108891 | 12109199 | Rab6             | 97    | 9.0216  | 4.91 | + | + |
| chr2L | 12207710 | 12207992 | CG31759          | 36    | 8.32052 | 4.70 | + | - |
| chr2L | 12418245 | 12418653 | vir-1            | 3542  | 8.92434 | 5.37 | + | - |
| chr2L | 12434458 | 12434943 | SC35             | 96    | 15.3456 | 6.38 | + | + |
| chr2L | 12434458 | 12434943 | Elf              | 130   | 15.3456 | 6.38 | + | + |
| chr2L | 12520196 | 12520567 | snoRNA:CG43051-a | 12307 | 20.5171 | 7.83 | + | - |
| chr2L | 12529482 | 12529943 | bun              | 11146 | 9.92817 | 5.22 | + | + |
| chr2L | 12718976 | 12719302 | MRP              | 68    | 7.30083 | 4.04 | + | + |
| chr2L | 12974136 | 12975189 | Vha68-2          | 1     | 4.95707 | 3.36 | + | + |
| chr2L | 13059830 | 13060523 | CG9932           | 228   | 9.87653 | 4.89 | + | + |
| chr2L | 13156030 | 13156817 | Pk34A            | 2123  | 5.75535 | 4.24 | + | - |
| chr2L | 13165407 | 13165749 | Sirt1            | 20    | 4.59498 | 3.16 | + | + |
| chr2L | 13176557 | 13177298 | Sfmbt            | 383   | 4.81682 | 3.49 | - | + |
| chr2L | 13176557 | 13177298 | CG5439           | 19    | 4.81682 | 3.49 | - | + |
| chr2L | 13289890 | 13290277 | CG31729          | 190   | 4.08231 | 3.42 | + | + |
| chr2L | 13549073 | 13549632 | B4               | 57    | 10.7269 | 5.00 | + | + |
| chr2L | 13665415 | 13666281 | CG18507          | 102   | 11.246  | 5.23 | + | + |
| chr2L | 13780501 | 13780803 | p38b             | 51    | 10.4035 | 4.85 | + | + |
| chr2L | 13904246 | 13904763 | Smg5             | 12    | 6.51044 | 3.67 | + | + |
| chr2L | 14022395 | 14022671 | CR45352          | 525   | 4.89278 | 3.66 | + | - |
| chr2L | 14348252 | 14349004 | mTTF             | 30    | 10.1156 | 5.31 | - | + |
| chr2L | 14385253 | 14385748 | ppk              | 4371  | 8.72833 | 5.08 | + | - |
| chr2L | 14409517 | 14409833 | eIB              | 241   | 7.76958 | 3.93 | + | - |
| chr2L | 14409517 | 14409833 | CR44733          | 36    | 7.76958 | 3.93 | + | - |
| chr2L | 15056984 | 15057309 | ck               | 698   | 6.87287 | 4.19 | + | + |
| chr2L | 15060492 | 15060878 | TfIIIS           | 30    | 6.02165 | 3.85 | - | + |
| chr2L | 15498804 | 15499602 | lace             | 186   | 8.47464 | 4.49 | + | + |
| chr2L | 15762377 | 15762932 | Gli              | 52    | 12.4179 | 5.77 | + | + |
| chr2L | 15912400 | 15912903 | CR44868          | 19    | 5.47582 | 3.55 | + | - |
| chr2L | 16268111 | 16268558 | CG4935           | 6145  | 8.67696 | 4.46 | + | - |
| chr2L | 16269209 | 16269844 | CG4935           | 7322  | 6.85483 | 3.73 | + | - |
| chr2L | 16272794 | 16273059 | CG4935           | 10762 | 4.48694 | 3.40 | + | + |
| chr2L | 16287415 | 16287939 | crp              | 7     | 11.1564 | 4.91 | + | + |
| chr2L | 16451012 | 16451278 | ldgf3            | 73    | 5.36976 | 3.60 | + | + |
| chr2L | 16491159 | 16491641 | Tpr2             | 216   | 10.1156 | 5.31 | + | - |
| chr2L | 16521415 | 16521926 | CG5953           | 1628  | 7.8286  | 4.90 | + | + |
| chr2L | 16525971 | 16526469 | mir-4943         | 2284  | 7.81438 | 4.30 | + | - |
| chr2L | 16532639 | 16533786 | CG5953           | 663   | 9.12391 | 4.67 | + | + |
| chr2L | 16727536 | 16727912 | VhaSFD           | 169   | 5.87999 | 3.46 | + | - |
| chr2L | 16880985 | 16881413 | CG31743          | 36    | 5.05193 | 3.42 | + | + |
| chr2L | 16888342 | 16889316 | tweek            | 16    | 9.22829 | 4.86 | + | + |
| chr2L | 16888342 | 16889316 | CR44392          | 1     | 9.22829 | 4.86 | + | + |
| chr2L | 17427657 | 17428458 | Dif              | 5     | 7.29631 | 4.29 | + | + |
| chr2L | 17500960 | 17501269 | CG6412           | 54    | 5.32495 | 3.37 | - | - |

|       |          |          |                     |       |         |       |   |   |
|-------|----------|----------|---------------------|-------|---------|-------|---|---|
| chr2L | 18152193 | 18152622 | Socs36E             | 25    | 6.25604 | 3.75  | + | + |
| chr2L | 18455643 | 18456411 | let-7-C             | 473   | 9.76167 | 5.30  | + | + |
| chr2L | 18484264 | 18484601 | CG10283             | 6     | 4.95707 | 3.36  | + | + |
| chr2L | 18572784 | 18573304 | Pde11               | 816   | 7.14896 | 4.35  | + | + |
| chr2L | 18590756 | 18591111 | CG15160             | 75    | 7.59497 | 4.60  | - | + |
| chr2L | 18677025 | 18678099 | CG31751             | 374   | 6.8328  | 4.04  | + | + |
| chr2L | 18695265 | 18695918 | CG10383             | 79    | 10.2459 | 4.78  | + | - |
| chr2L | 18695265 | 18695918 | CG10338             | 18    | 10.2459 | 4.78  | + | - |
| chr2L | 18732531 | 18733077 | CG10348             | 105   | 5.03438 | 3.63  | + | + |
| chr2L | 18753131 | 18753766 | CG15167             | 13150 | 6.61192 | 4.05  | + | - |
| chr2L | 18810555 | 18811333 | CG42502             | 151   | 8.44541 | 5.09  | + | + |
| chr2L | 18810555 | 18811333 | CG10570             | 151   | 8.44541 | 5.09  | + | + |
| chr2L | 18810555 | 18811333 | CG42502             | 115   | 8.44541 | 5.09  | + | + |
| chr2L | 18810555 | 18811333 | CG10570             | 115   | 8.44541 | 5.09  | + | + |
| chr2L | 18830887 | 18831423 | CG17597             | 11    | 8.63045 | 4.32  | + | - |
| chr2L | 18830887 | 18831423 | ScpX                | 86    | 8.63045 | 4.32  | + | - |
| chr2L | 18839186 | 18839669 | CG10600             | 349   | 6.19484 | 3.95  | + | + |
| chr2L | 18881358 | 18881644 | tup                 | 232   | 5.91102 | 3.91  | + | + |
| chr2L | 19003165 | 19003616 | CG31793             | 38    | 19.5326 | 7.61  | - | - |
| chr2L | 19009071 | 19009581 | RpL30               | 38    | 8.00766 | 3.94  | + | + |
| chr2L | 19054050 | 19054614 | CG10492             | 321   | 12.7778 | 5.60  | + | + |
| chr2L | 19119985 | 19120411 | Ddc                 | 35    | 5.68721 | 3.66  | + | - |
| chr2L | 19158182 | 19158831 | brat                | 218   | 6.8328  | 3.92  | + | + |
| chr2L | 19190247 | 19190555 | drl                 | 88    | 9.19661 | 5.00  | + | + |
| chr2L | 19422441 | 19422822 | Pax                 | 895   | 7.08802 | 4.46  | + | - |
| chr2L | 19426514 | 19426820 | Pax                 | 92    | 5.12257 | 3.57  | + | - |
| chr2L | 19508476 | 19508907 | CG10188             | 171   | 5.5796  | 3.61  | + | + |
| chr2L | 19572268 | 19572650 | spi                 | 76    | 5.14201 | 3.27  | + | + |
| chr2L | 19865838 | 19866275 | sick                | 147   | 5.37529 | 3.49  | + | - |
| chr2L | 19887543 | 19887840 | CG10481             | 4902  | 13.5734 | 6.52  | - | - |
| chr2L | 19895094 | 19895515 | sick                | 660   | 5.79011 | 3.72  | + | - |
| chr2L | 20084474 | 20085065 | fok                 | 451   | 6.95804 | 4.11  | + | + |
| chr2L | 20416937 | 20417552 | Arpc2               | 18    | 9.71773 | 4.95  | + | + |
| chr2L | 20428851 | 20429298 | CG31688             | 75    | 6.16217 | 4.06  | + | - |
| chr2L | 20656117 | 20656449 | bru                 | 17    | 4.16717 | 3.30  | - | + |
| chr2L | 20656117 | 20656449 | CG2614              | 230   | 4.16717 | 3.30  | - | + |
| chr2L | 20758198 | 20758499 | dia                 | 218   | 6.53216 | 4.47  | + | + |
| chr2L | 20787466 | 20787727 | Pomp                | 37    | 6.70936 | 3.98  | - | + |
| chr2L | 20793190 | 20794253 | vari                | 44    | 11.8109 | 5.49  | + | + |
| chr2L | 20810943 | 20811473 | CG9328              | 1258  | 5.69073 | 3.91  | - | - |
| chr2L | 20821922 | 20822313 | CG9331              | 755   | 4.00061 | 3.09  | + | - |
| chr2L | 20823808 | 20824171 | CG9331              | 428   | 10.1621 | 5.34  | + | + |
| chr2L | 20829865 | 20830211 | CG31673             | 451   | 7.91904 | 4.63  | + | - |
| chr2L | 20922759 | 20923070 | Mtp                 | 65    | 5.84855 | 3.88  | + | - |
| chr2L | 21158507 | 21159155 | CG9249              | 271   | 4.82977 | 3.62  | - | - |
| chr2L | 21158507 | 21159155 | CG9248              | 21    | 4.82977 | 3.62  | - | - |
| chr2L | 21174836 | 21178612 | caRNA:PsiU2-38.40.4 | 291   | 60.2138 | 16.78 | + | + |
| chr2L | 21174836 | 21178612 | CR44911             | 942   | 60.2138 | 16.78 | + | + |
| chr2L | 21309348 | 21310227 | Mondo               | 92    | 5.09715 | 3.55  | + | + |
| chr2L | 21314225 | 21314758 | crc                 | 19    | 8.17404 | 4.35  | + | - |
| chr2L | 22018870 | 22019307 | tio                 | 57    | 8.13971 | 4.21  | + | - |
| chr2L | 22018870 | 22019307 | CR33987             | 57    | 8.13971 | 4.21  | + | - |
| chr2R | 870217   | 870586   | CG40439             | 15548 | 101.096 | 11.79 | - | + |
| chr2R | 6036074  | 6036591  | SCAP                | 114   | 7.45333 | 4.24  | + | + |
| chr2R | 6132826  | 6133990  | EcR                 | 1855  | 12.0441 | 5.15  | + | + |
| chr2R | 6151045  | 6151500  | EcR                 | 5852  | 6.6001  | 3.81  | + | - |
| chr2R | 6241853  | 6242304  | Pld                 | 8     | 5.75988 | 3.82  | + | - |
| chr2R | 6628150  | 6628630  | CG33919             | 3931  | 5.81596 | 3.86  | + | - |

|       |         |         |          |       |         |      |   |   |
|-------|---------|---------|----------|-------|---------|------|---|---|
| chr2R | 6632325 | 6633291 | Vha16-1  | 43    | 6.02268 | 3.74 | + | + |
| chr2R | 6647813 | 6649304 | Debcl    | 516   | 5.5796  | 3.61 | + | - |
| chr2R | 6662714 | 6663238 | Adf1     | 767   | 15.9765 | 6.29 | + | + |
| chr2R | 6741744 | 6742514 | phtf     | 17    | 7.19385 | 4.11 | + | + |
| chr2R | 6872755 | 6873096 | coro     | 242   | 5.31777 | 3.46 | + | + |
| chr2R | 6878255 | 6878798 | Spn42Da  | 23    | 5.70738 | 3.57 | + | + |
| chr2R | 6923219 | 6923532 | CG3358   | 18    | 11.8116 | 5.33 | + | - |
| chr2R | 6992499 | 6992856 | Tsp42Ea  | 45    | 8.97314 | 4.60 | + | + |
| chr2R | 6992499 | 6992856 | CG30159  | 40    | 8.97314 | 4.60 | + | + |
| chr2R | 6992499 | 6992856 | Tsp42Ea  | 40    | 8.97314 | 4.60 | + | + |
| chr2R | 6992499 | 6992856 | CG30159  | 40    | 8.97314 | 4.60 | + | + |
| chr2R | 6992499 | 6992856 | Tsp42Ea  | 40    | 8.97314 | 4.60 | + | + |
| chr2R | 7045665 | 7046114 | Tsp42EI  | 165   | 4.58751 | 3.36 | + | + |
| chr2R | 7150565 | 7150924 | pk       | 64    | 7.56768 | 4.74 | + | + |
| chr2R | 7300631 | 7301004 | CG12164  | 10516 | 11.2057 | 6.09 | + | - |
| chr2R | 7387117 | 7387457 | Dhx15    | 32    | 8.01338 | 4.15 | - | + |
| chr2R | 7418520 | 7418847 | so       | 699   | 8.53386 | 4.66 | + | + |
| chr2R | 7464677 | 7465080 | CG11127  | 1386  | 4.59814 | 3.47 | + | - |
| chr2R | 7477574 | 7477940 | Aldh-III | 589   | 7.07825 | 4.31 | + | - |
| chr2R | 7483395 | 7486102 | wech     | 1931  | 22.9227 | 8.67 | - | - |
| chr2R | 7528985 | 7529379 | Drat     | 123   | 9.5651  | 5.03 | + | + |
| chr2R | 7533560 | 7533949 | Cyt-b5   | 251   | 5.90416 | 3.67 | + | + |
| chr2R | 7566604 | 7567141 | boca     | 106   | 15.1723 | 6.13 | + | + |
| chr2R | 7566604 | 7567141 | Vps13    | 36    | 15.1723 | 6.13 | + | + |
| chr2R | 7698885 | 7699640 | LRR      | 479   | 12.9107 | 6.00 | + | + |
| chr2R | 7698885 | 7699640 | CG30493  | 129   | 12.9107 | 6.00 | + | + |
| chr2R | 7698885 | 7699640 | CG30496  | 118   | 12.9107 | 6.00 | + | + |
| chr2R | 7735432 | 7735690 | CG18812  | 56    | 6.15082 | 4.19 | + | + |
| chr2R | 7767489 | 7767781 | CG45093  | 8745  | 6.29928 | 4.14 | + | - |
| chr2R | 7767489 | 7767781 | CG30497  | 8745  | 6.29928 | 4.14 | + | - |
| chr2R | 7812250 | 7812828 | CG1882   | 40    | 11.378  | 4.88 | + | - |
| chr2R | 7962470 | 7962873 | nito     | 228   | 4.24545 | 3.14 | - | + |
| chr2R | 7989679 | 7990041 | ACC      | 120   | 9.5651  | 4.61 | + | - |
| chr2R | 7989679 | 7990041 | Nup44A   | 24    | 9.5651  | 4.61 | + | - |
| chr2R | 8018545 | 8019173 | CR45267  | 247   | 6.48358 | 4.11 | + | + |
| chr2R | 8068716 | 8069391 | lig      | 330   | 4.77508 | 3.26 | + | + |
| chr2R | 8082823 | 8083420 | sut1     | 1     | 6.48702 | 3.98 | + | + |
| chr2R | 8082823 | 8083420 | slv      | 99    | 6.48702 | 3.98 | + | + |
| chr2R | 8131285 | 8131797 | Pbp49    | 212   | 4.51847 | 3.12 | + | + |
| chr2R | 8131285 | 8131797 | CG42516  | 212   | 4.51847 | 3.12 | + | + |
| chr2R | 8131285 | 8131797 | Pbp49    | 212   | 4.51847 | 3.12 | + | + |
| chr2R | 8131285 | 8131797 | Pabp2    | 105   | 4.51847 | 3.12 | + | + |
| chr2R | 8145382 | 8146482 | Lpin     | 82    | 7.68006 | 4.23 | + | + |
| chr2R | 8328853 | 8329485 | pdm3     | 1692  | 7.91708 | 4.78 | + | - |
| chr2R | 8608305 | 8608602 | CG8642   | 5687  | 8.44541 | 5.09 | + | - |
| chr2R | 8696295 | 8696688 | CG8738   | 34    | 4.13788 | 3.28 | + | + |
| chr2R | 8724100 | 8724595 | gcl      | 33    | 4.49913 | 3.30 | + | + |
| chr2R | 9141106 | 9141388 | CG44286  | 56    | 5.56646 | 3.71 | + | - |
| chr2R | 9148765 | 9149023 | CG30345  | 229   | 4.37187 | 3.13 | + | + |
| chr2R | 9186089 | 9186341 | Rab32    | 166   | 4.44932 | 3.17 | + | + |
| chr2R | 9251939 | 9252333 | CG30343  | 146   | 11.8116 | 5.33 | - | - |
| chr2R | 9308273 | 9308685 | Myd88    | 112   | 7.73054 | 4.25 | + | + |
| chr2R | 9426316 | 9426891 | Pdk      | 80    | 6.30792 | 3.57 | + | + |
| chr2R | 9437884 | 9438133 | ced-6    | 2907  | 4.02978 | 3.63 | + | - |
| chr2R | 9440708 | 9441180 | ced-6    | 149   | 4.82013 | 3.39 | + | + |
| chr2R | 9445776 | 9446558 | CR45321  | 260   | 11.7033 | 5.01 | + | + |
| chr2R | 9445776 | 9446558 | Camta    | 9     | 11.7033 | 5.01 | + | + |
| chr2R | 9552810 | 9553117 | CR43651  | 19    | 4.73151 | 3.06 | + | + |



|       |          |          |                   |       |         |      |   |   |
|-------|----------|----------|-------------------|-------|---------|------|---|---|
| chr2R | 9553416  | 9554261  | mir-14            | 36    | 7.54645 | 4.29 | + | + |
| chr2R | 9578769  | 9579081  | CR46257           | 77    | 4.27117 | 3.26 | + | + |
| chr2R | 9578769  | 9579081  | Not1              | 26    | 4.27117 | 3.26 | + | + |
| chr2R | 9593978  | 9594416  | CG1902            | 204   | 12.2553 | 5.87 | + | + |
| chr2R | 9593978  | 9594416  | CG30338           | 204   | 12.2553 | 5.87 | + | + |
| chr2R | 9834949  | 9835286  | hebe              | 1560  | 6.13849 | 3.92 | + | - |
| chr2R | 9861303  | 9861859  | PCB               | 161   | 4.36525 | 3.32 | + | - |
| chr2R | 9903318  | 9904297  | CG1441            | 707   | 10.9077 | 5.93 | + | - |
| chr2R | 9910747  | 9911012  | Etf-QO            | 19    | 5.79011 | 3.84 | + | - |
| chr2R | 9958143  | 9958909  | Mef2              | 591   | 6.22782 | 3.97 | + | + |
| chr2R | 9959503  | 9960126  | Pal1              | 211   | 6.25604 | 3.75 | + | + |
| chr2R | 9959503  | 9960126  | CG15863           | 27    | 6.25604 | 3.75 | + | + |
| chr2R | 9959503  | 9960126  | Pal1              | 318   | 6.25604 | 3.75 | + | + |
| chr2R | 9988269  | 9988820  | TER94             | 692   | 6.02165 | 3.85 | + | + |
| chr2R | 10025047 | 10026214 | Pka-R2            | 565   | 6.13669 | 3.91 | + | + |
| chr2R | 10100405 | 10102036 | 14-3-3zeta        | 447   | 7.81438 | 4.30 | + | + |
| chr2R | 10110843 | 10111198 | Pfk               | 288   | 4.59498 | 3.16 | + | + |
| chr2R | 10134942 | 10135341 | gem               | 70    | 4.13788 | 3.28 | + | - |
| chr2R | 10159471 | 10160213 | mlt               | 720   | 10.2575 | 5.07 | + | + |
| chr2R | 10192264 | 10192588 | KCNQ              | 59    | 5.01948 | 3.50 | + | - |
| chr2R | 10475230 | 10475876 | whd               | 95    | 5.01885 | 3.40 | + | + |
| chr2R | 10554065 | 10554387 | psq               | 3652  | 7.72842 | 4.38 | + | - |
| chr2R | 10645518 | 10645873 | Elp2              | 72    | 6.96631 | 4.12 | - | + |
| chr2R | 10781696 | 10782078 | CG33144           | 831   | 5.26331 | 3.54 | + | - |
| chr2R | 10809448 | 10809924 | CG12935           | 77    | 7.87448 | 4.46 | - | + |
| chr2R | 10823250 | 10823924 | CG12343           | 270   | 8.53386 | 4.66 | - | + |
| chr2R | 10823250 | 10823924 | CG12325           | 48    | 8.53386 | 4.66 | - | + |
| chr2R | 10874052 | 10874894 | CG30015           | 8     | 9.12391 | 4.67 | + | + |
| chr2R | 11066520 | 11066819 | CG43188           | 19004 | 4.65183 | 3.63 | - | - |
| chr2R | 11149778 | 11150265 | CG12391           | 35    | 6.71758 | 3.87 | - | - |
| chr2R | 11175626 | 11176152 | shn               | 2196  | 6.29592 | 4.14 | + | - |
| chr2R | 11204976 | 11205356 | shn               | 451   | 5.60713 | 3.52 | + | - |
| chr2R | 11379460 | 11380086 | Tsp47F            | 765   | 6.15377 | 4.35 | - | - |
| chr2R | 11451767 | 11452902 | E(Pc)             | 106   | 8.6267  | 5.02 | + | + |
| chr2R | 11547617 | 11547889 | en                | 19600 | 4.52332 | 3.67 | - | - |
| chr2R | 11651571 | 11651948 | CG9003            | 190   | 8.00356 | 4.04 | + | - |
| chr2R | 11651571 | 11651948 | CG34228           | 50    | 8.00356 | 4.04 | + | - |
| chr2R | 11764192 | 11764916 | CG13193           | 3759  | 5.94021 | 4.07 | + | - |
| chr2R | 11885392 | 11885764 | CG13185           | 35    | 6.73958 | 4.12 | - | + |
| chr2R | 11891905 | 11893466 | Ef1alpha48D       | 1116  | 10.313  | 4.68 | + | + |
| chr2R | 11891905 | 11893466 | snoRNA:Me28S-A132 | 115   | 10.313  | 4.68 | + | + |
| chr2R | 12037227 | 12037548 | 128up             | 55    | 4.89568 | 3.54 | - | + |
| chr2R | 12140472 | 12140751 | CG8378            | 10    | 5.24882 | 3.90 | - | - |
| chr2R | 12168418 | 12169261 | Oda               | 566   | 9.97354 | 4.93 | + | - |
| chr2R | 12168418 | 12169261 | SmD3              | 324   | 9.97354 | 4.93 | + | - |
| chr2R | 12170222 | 12170830 | mir-281-2         | 97    | 5.81596 | 3.86 | + | + |
| chr2R | 12170222 | 12170830 | mir-281-1         | 121   | 5.81596 | 3.86 | + | + |
| chr2R | 12171138 | 12171675 | Oda               | 181   | 6.02165 | 3.85 | + | + |
| chr2R | 12171138 | 12171675 | CR46194           | 154   | 6.02165 | 3.85 | + | + |
| chr2R | 12343870 | 12344985 | CG8839            | 201   | 10.4876 | 5.34 | + | + |
| chr2R | 12343870 | 12344985 | ana3              | 566   | 10.4876 | 5.34 | + | + |
| chr2R | 12435756 | 12436092 | DUBAI             | 8     | 5.42437 | 3.63 | - | + |
| chr2R | 12452950 | 12453452 | Lac               | 76    | 12.013  | 5.27 | + | - |
| chr2R | 12461938 | 12462296 | dgt5              | 5969  | 5.69073 | 3.91 | + | - |
| chr2R | 12528847 | 12529385 | fra               | 35    | 4.45884 | 3.18 | + | + |
| chr2R | 12591310 | 12592314 | Sin3A             | 1155  | 6.25152 | 3.86 | + | + |
| chr2R | 12593524 | 12593890 | Amph              | 108   | 7.55162 | 4.17 | + | - |
| chr2R | 12593524 | 12593890 | CR45279           | 116   | 7.55162 | 4.17 | + | - |

|       |          |          |            |       |         |      |   |   |
|-------|----------|----------|------------|-------|---------|------|---|---|
| chr2R | 12705069 | 12705397 | CG42663    | 54    | 9.55589 | 5.19 | + | + |
| chr2R | 12755930 | 12756355 | Taz        | 232   | 4.72558 | 3.33 | + | + |
| chr2R | 12916301 | 12916613 | NAT1       | 344   | 5.57085 | 3.60 | + | + |
| chr2R | 12936211 | 12936775 | CG13322    | 56    | 7.42562 | 4.10 | + | + |
| chr2R | 12955887 | 12956227 | CG13321    | 2451  | 4.51847 | 3.12 | + | - |
| chr2R | 12990754 | 12991344 | CG33798    | 2942  | 7.72842 | 4.38 | + | + |
| chr2R | 13015684 | 13016075 | Su(z)2     | 18769 | 6.27495 | 3.65 | + | - |
| chr2R | 13168432 | 13168802 | Spt-I      | 65    | 11.2867 | 5.75 | + | - |
| chr2R | 13429703 | 13430114 | CG42321    | 140   | 10.6657 | 5.26 | + | + |
| chr2R | 13483020 | 13483428 | arr        | 2     | 7.65493 | 4.48 | + | + |
| chr2R | 13494788 | 13495492 | bbc        | 83    | 5.84855 | 3.88 | + | + |
| chr2R | 13545384 | 13545912 | CG6145     | 111   | 10.0274 | 4.82 | + | - |
| chr2R | 13824080 | 13824850 | fl(2)d     | 67    | 13.536  | 5.61 | + | - |
| chr2R | 13925326 | 13925641 | shot       | 37    | 6.27495 | 3.65 | + | - |
| chr2R | 13942047 | 13942354 | shot       | 30    | 4.53991 | 3.23 | + | + |
| chr2R | 13959457 | 13959820 | Rpn13      | 586   | 4.92104 | 3.56 | - | + |
| chr2R | 14006779 | 14007272 | mir-4978   | 947   | 10.6904 | 5.12 | + | + |
| chr2R | 14212298 | 14213036 | Sox15      | 165   | 8.60204 | 4.55 | + | + |
| chr2R | 14270122 | 14270777 | SelD       | 9     | 7.02504 | 4.02 | + | + |
| chr2R | 14270122 | 14270777 | conv       | 79    | 7.02504 | 4.02 | + | + |
| chr2R | 14352149 | 14352522 | CG8613     | 91    | 5.57085 | 3.83 | - | + |
| chr2R | 14513978 | 14514279 | CG30197    | 22    | 8.48197 | 4.78 | + | + |
| chr2R | 14600873 | 14601126 | Rpl1       | 211   | 4.08868 | 3.15 | - | + |
| chr2R | 14860481 | 14860866 | U3-55K     | 135   | 4.27117 | 3.26 | - | + |
| chr2R | 14882035 | 14882343 | Cyp6a20    | 45    | 6.50972 | 4.27 | + | + |
| chr2R | 15128223 | 15128953 | chn        | 24    | 5.23108 | 3.89 | + | + |
| chr2R | 15511463 | 15512044 | GalNAc-T1  | 30    | 17.5261 | 6.75 | + | - |
| chr2R | 15613294 | 15614784 | CG42524    | 821   | 8.01716 | 4.53 | + | + |
| chr2R | 15675746 | 15676639 | fus        | 99    | 6.73958 | 4.12 | + | + |
| chr2R | 15675746 | 15676639 | CR45143    | 586   | 6.73958 | 4.12 | + | + |
| chr2R | 15735109 | 15735408 | CG30089    | 252   | 7.84486 | 4.59 | + | + |
| chr2R | 15753983 | 15754548 | CG30089    | 18949 | 4.29093 | 3.08 | + | - |
| chr2R | 15848536 | 15848892 | tun        | 81    | 7.36908 | 4.47 | + | + |
| chr2R | 15861265 | 15862108 | Gpo-1      | 83    | 11.3623 | 5.28 | + | + |
| chr2R | 15922511 | 15922787 | sli        | 520   | 5.69073 | 3.91 | - | - |
| chr2R | 15951860 | 15952279 | Strn-Mlck  | 128   | 8.07705 | 5.04 | + | - |
| chr2R | 16014712 | 16015037 | Prosbeta1  | 47    | 8.97314 | 4.24 | - | - |
| chr2R | 16014712 | 16015037 | Rrp42      | 73    | 8.97314 | 4.24 | - | - |
| chr2R | 16017612 | 16018402 | CG8399     | 5     | 8.48197 | 4.78 | + | + |
| chr2R | 16098245 | 16098635 | Dg         | 134   | 5.20345 | 3.22 | + | - |
| chr2R | 16102588 | 16103215 | CG8414     | 471   | 6.30792 | 3.57 | + | - |
| chr2R | 16102588 | 16103215 | Rho1       | 17    | 6.30792 | 3.57 | + | - |
| chr2R | 16129575 | 16130285 | spin       | 4993  | 5.74412 | 3.49 | + | - |
| chr2R | 16138859 | 16139153 | Got1       | 402   | 6.9485  | 3.98 | + | + |
| chr2R | 16196870 | 16197752 | CG42837    | 40    | 12.803  | 5.78 | + | + |
| chr2R | 16196870 | 16197752 | CG44243    | 40    | 12.803  | 5.78 | + | + |
| chr2R | 16336059 | 16336914 | Hmgs       | 547   | 11.1801 | 5.20 | + | - |
| chr2R | 16336059 | 16336914 | Vha44      | 1     | 11.1801 | 5.20 | + | - |
| chr2R | 16336059 | 16336914 | Hmgs       | 123   | 11.1801 | 5.20 | + | - |
| chr2R | 16585695 | 16586283 | RpLP2      | 43    | 5.37529 | 3.49 | + | + |
| chr2R | 16588894 | 16589356 | CG8311     | 6     | 6.48702 | 3.76 | + | - |
| chr2R | 16818896 | 16819363 | CR43417    | 181   | 8.01716 | 4.53 | + | - |
| chr2R | 16828829 | 16829391 | CR43650    | 126   | 4.23076 | 3.14 | + | - |
| chr2R | 16830349 | 16831021 | CR43650    | 218   | 6.71948 | 3.98 | + | + |
| chr2R | 17392239 | 17392870 | CG10939    | 1917  | 8.23897 | 4.03 | + | - |
| chr2R | 17420041 | 17420854 | l(2)k01209 | 185   | 5.6505  | 3.44 | + | + |
| chr2R | 17436318 | 17436794 | CG18467    | 3784  | 7.94962 | 4.36 | + | + |
| chr2R | 17457346 | 17458052 | CG14478    | 20    | 7.82408 | 4.89 | + | + |

|       |          |          |            |       |         |      |   |   |
|-------|----------|----------|------------|-------|---------|------|---|---|
| chr2R | 17469454 | 17469937 | qkr54B     | 47    | 12.007  | 5.58 | + | + |
| chr2R | 17513780 | 17514308 | CG4853     | 12    | 6.24359 | 4.25 | - | + |
| chr2R | 17547410 | 17548575 | RpL18A     | 283   | 11.4464 | 5.65 | + | + |
| chr2R | 17547410 | 17548575 | MESR4      | 23    | 11.4464 | 5.65 | + | + |
| chr2R | 17698261 | 17698517 | rdgBbeta   | 15    | 4.57834 | 3.78 | - | + |
| chr2R | 17760903 | 17761777 | CG5009     | 160   | 7.54642 | 3.84 | + | + |
| chr2R | 17789282 | 17789596 | Ubc10      | 27    | 4.91748 | 3.44 | + | + |
| chr2R | 17800796 | 17801174 | CR45270    | 50    | 8.37119 | 4.20 | + | + |
| chr2R | 17800796 | 17801174 | grh        | 120   | 8.37119 | 4.20 | + | + |
| chr2R | 17823226 | 17823632 | grh        | 80    | 4.57798 | 3.92 | + | + |
| chr2R | 17871931 | 17872228 | Mapmodulin | 102   | 4.77508 | 3.26 | + | + |
| chr2R | 18141469 | 18142206 | pAbp       | 666   | 4.89278 | 3.43 | + | + |
| chr2R | 18183928 | 18184379 | CG5721     | 86    | 8.6267  | 5.02 | + | - |
| chr2R | 18357494 | 18357861 | sbb        | 358   | 8.53386 | 4.66 | + | - |
| chr2R | 18408795 | 18409114 | GstE9      | 78    | 5.5796  | 3.61 | + | - |
| chr2R | 18440875 | 18441327 | slim       | 76    | 6.02268 | 3.74 | + | + |
| chr2R | 18528733 | 18529086 | CG10924    | 1457  | 7.78369 | 3.84 | + | - |
| chr2R | 18611470 | 18612057 | GEFmeso    | 148   | 8.01306 | 4.53 | + | + |
| chr2R | 18687981 | 18688467 | Sik3       | 27    | 8.23591 | 4.51 | + | + |
| chr2R | 18829499 | 18829795 | CG15097    | 37    | 7.08208 | 4.45 | + | + |
| chr2R | 19253907 | 19254441 | CG33453    | 827   | 9.74621 | 5.29 | + | - |
| chr2R | 19424856 | 19425475 | hts        | 333   | 7.09903 | 3.95 | + | + |
| chr2R | 19424856 | 19425475 | CalpA      | 124   | 7.09903 | 3.95 | + | + |
| chr2R | 19451109 | 19451800 | betaTub56D | 9     | 6.13669 | 3.79 | + | + |
| chr2R | 19462312 | 19462791 | par-1      | 113   | 6.36773 | 3.80 | + | - |
| chr2R | 19468058 | 19468786 | par-1      | 791   | 8.95443 | 4.59 | + | - |
| chr2R | 20118727 | 20119066 | 18w        | 7414  | 6.02165 | 3.85 | - | - |
| chr2R | 20531731 | 20532113 | CR44651    | 71    | 4.9935  | 3.49 | + | - |
| chr2R | 20534161 | 20534529 | CG18067    | 52    | 6.25964 | 3.99 | + | + |
| chr2R | 20551903 | 20552187 | CG18065    | 29    | 5.69583 | 3.37 | - | - |
| chr2R | 20551903 | 20552187 | CG13430    | 29    | 5.69583 | 3.37 | - | - |
| chr2R | 20618087 | 20618665 | Hil        | 423   | 4.85366 | 3.30 | + | - |
| chr2R | 20618087 | 20618665 | CG9945     | 12    | 4.85366 | 3.30 | + | - |
| chr2R | 20640751 | 20641173 | maf-S      | 6     | 9.37364 | 5.09 | - | + |
| chr2R | 20670940 | 20671593 | exu        | 150   | 10.1441 | 5.01 | + | + |
| chr2R | 20670940 | 20671593 | CG30152    | 30    | 10.1441 | 5.01 | + | + |
| chr2R | 21000179 | 21000791 | CG10543    | 168   | 7.19385 | 4.11 | + | - |
| chr2R | 21057566 | 21057953 | cpa        | 58    | 11.1797 | 5.88 | + | + |
| chr2R | 21141946 | 21142261 | Magi       | 140   | 5.23108 | 3.32 | + | + |
| chr2R | 21143521 | 21143982 | Xbp1       | 129   | 6.84115 | 4.05 | + | + |
| chr2R | 21178794 | 21179145 | Pu         | 176   | 13.5741 | 6.32 | + | + |
| chr2R | 21250917 | 21251693 | ASPP       | 16    | 5.91104 | 3.68 | + | - |
| chr2R | 21295454 | 21296234 | CG9752     | 51    | 12.8897 | 5.50 | + | - |
| chr2R | 21295454 | 21296234 | CG42672    | 12    | 12.8897 | 5.50 | + | - |
| chr2R | 21323252 | 21324024 | CG30394    | 402   | 9.97354 | 4.93 | + | + |
| chr2R | 21323252 | 21324024 | dom        | 293   | 9.97354 | 4.93 | + | + |
| chr2R | 21365514 | 21365786 | cv-2       | 13795 | 9.82691 | 5.71 | + | - |
| chr2R | 21382326 | 21382723 | CG10795    | 1900  | 10.625  | 5.77 | - | - |
| chr2R | 21480772 | 21481185 | Sdc        | 301   | 5.80675 | 3.62 | + | + |
| chr2R | 21501624 | 21502102 | TAF1C-like | 27    | 6.84122 | 3.93 | + | - |
| chr2R | 21501624 | 21502102 | MESK2      | 337   | 6.84122 | 3.93 | + | - |
| chr2R | 21502426 | 21503008 | MESK2      | 505   | 8.93304 | 4.72 | + | - |
| chr2R | 21535464 | 21535739 | CG30286    | 1202  | 8.32052 | 4.70 | + | - |
| chr2R | 21612862 | 21613234 | CG15673    | 45    | 9.00061 | 5.06 | + | + |
| chr2R | 21661971 | 21662428 | pirk       | 86    | 6.87287 | 4.19 | + | + |
| chr2R | 21662947 | 21663538 | pirk       | 235   | 10.9577 | 5.76 | + | + |
| chr2R | 21662947 | 21663538 | CR44748    | 71    | 10.9577 | 5.76 | + | + |
| chr2R | 21702577 | 21703793 | HmgZ       | 250   | 13.1208 | 5.75 | + | + |

|       |          |          |          |      |         |      |   |   |
|-------|----------|----------|----------|------|---------|------|---|---|
| chr2R | 21704338 | 21704965 | HmgZ     | 254  | 8.67696 | 4.46 | + | + |
| chr2R | 22060786 | 22061103 | Snp      | 61   | 9.00104 | 4.36 | + | - |
| chr2R | 22311820 | 22312169 | wdp      | 41   | 4.24601 | 3.25 | + | + |
| chr2R | 22317889 | 22318447 | Gp150    | 277  | 4.91748 | 3.44 | + | + |
| chr2R | 22561791 | 22562346 | px       | 13   | 20.0233 | 8.06 | + | + |
| chr2R | 22561791 | 22562346 | CG11362  | 228  | 20.0233 | 8.06 | + | + |
| chr2R | 22570268 | 22571040 | CG11362  | 8606 | 6.51367 | 4.13 | + | - |
| chr2R | 22641164 | 22641489 | RpS24    | 119  | 6.13669 | 3.79 | - | + |
| chr2R | 22669217 | 22669533 | CG13516  | 57   | 21.9012 | 8.70 | + | + |
| chr2R | 22686070 | 22686339 | Ppa      | 2818 | 6.48117 | 3.86 | + | + |
| chr2R | 22688820 | 22689078 | Ppa      | 57   | 7.59014 | 4.31 | + | + |
| chr2R | 22798747 | 22799188 | blw      | 55   | 6.48117 | 3.86 | + | + |
| chr2R | 22853461 | 22854464 | CG13531  | 467  | 10.5865 | 5.07 | + | + |
| chr2R | 22853461 | 22854464 | RpL23    | 88   | 10.5865 | 5.07 | + | + |
| chr2R | 22895667 | 22896379 | nahoda   | 17   | 7.59497 | 4.60 | + | + |
| chr2R | 22933691 | 22934563 | CG3788   | 221  | 9.83027 | 5.17 | + | + |
| chr2R | 22998678 | 22998974 | CG9896   | 74   | 5.62243 | 3.63 | + | + |
| chr2R | 23419368 | 23419886 | CG9812   | 53   | 9.94006 | 5.07 | + | + |
| chr2R | 23432140 | 23432523 | CG9815   | 189  | 4.62773 | 3.61 | + | - |
| chr2R | 23523521 | 23523949 | RabX1    | 111  | 10.5424 | 5.05 | + | + |
| chr2R | 23523521 | 23523949 | mi       | 131  | 10.5424 | 5.05 | + | + |
| chr2R | 23547664 | 23548506 | wmd      | 54   | 8.23591 | 4.51 | + | + |
| chr2R | 23547664 | 23548506 | levy     | 196  | 8.23591 | 4.51 | + | + |
| chr2R | 23564756 | 23565064 | apt      | 15   | 9.00104 | 4.36 | - | - |
| chr2R | 23614698 | 23615025 | CG4019   | 125  | 16.3675 | 7.47 | + | - |
| chr2R | 23711966 | 23712911 | Sesn     | 1631 | 8.40087 | 4.74 | + | + |
| chr2R | 23713308 | 23714074 | Sesn     | 124  | 5.24195 | 3.42 | + | + |
| chr2R | 23725974 | 23726554 | CR45325  | 5017 | 4.06253 | 3.04 | + | - |
| chr2R | 23817681 | 23818698 | CG4797   | 326  | 6.44897 | 4.09 | + | - |
| chr2R | 23871614 | 23872175 | ken      | 1684 | 5.5796  | 3.84 | + | + |
| chr2R | 23872683 | 23873471 | ken      | 2638 | 5.79209 | 3.61 | + | + |
| chr2R | 23898046 | 23898561 | CG5339   | 8    | 5.09715 | 3.34 | - | + |
| chr2R | 23898046 | 23898561 | Lpt      | 322  | 5.09715 | 3.34 | - | + |
| chr2R | 23978297 | 23979209 | Sox14    | 353  | 26.5581 | 7.65 | + | + |
| chr2R | 23979702 | 23980220 | Sox14    | 111  | 4.40661 | 3.24 | + | + |
| chr2R | 24026356 | 24026979 | Ebplll   | 17   | 6.52753 | 4.14 | + | + |
| chr2R | 24342474 | 24342898 | bs       | 187  | 8.48197 | 4.78 | + | - |
| chr2R | 24343588 | 24343930 | bs       | 51   | 6.13669 | 3.79 | - | - |
| chr2R | 24402030 | 24402746 | Slik     | 69   | 5.37529 | 3.49 | + | + |
| chr2R | 24571515 | 24571973 | CG3511   | 270  | 4.68441 | 3.21 | + | + |
| chr2R | 24571515 | 24571973 | Fcp1     | 75   | 4.68441 | 3.21 | + | + |
| chr2R | 24571515 | 24571973 | CG3511   | 48   | 4.68441 | 3.21 | + | + |
| chr2R | 24580889 | 24581945 | pio      | 84   | 7.36908 | 4.33 | + | + |
| chr2R | 24599695 | 24599959 | ATPsynF  | 61   | 8.47464 | 4.49 | + | + |
| chr2R | 24599695 | 24599959 | CG3548   | 64   | 8.47464 | 4.49 | + | + |
| chr2R | 24611609 | 24611888 | Adck     | 6    | 4.60674 | 3.67 | - | - |
| chr2R | 24611609 | 24611888 | CG4741   | 148  | 4.60674 | 3.67 | - | - |
| chr2R | 24611609 | 24611888 | Adck     | 185  | 4.60674 | 3.67 | - | - |
| chr2R | 24669053 | 24669340 | CG33228  | 13   | 6.58558 | 4.17 | - | + |
| chr2R | 24684813 | 24685387 | Mmp1     | 61   | 5.97428 | 3.51 | + | - |
| chr2R | 24743668 | 24744083 | Usp15-31 | 144  | 4.72492 | 3.62 | + | - |
| chr2R | 24767594 | 24768245 | GstE12   | 142  | 9.76807 | 4.98 | + | + |
| chr2R | 24792849 | 24793673 | Reg-5    | 121  | 6.84115 | 4.05 | + | + |
| chr2R | 24814374 | 24814916 | Dll      | 31   | 4.63182 | 3.28 | + | + |
| chr2R | 24863773 | 24864039 | CR44829  | 4544 | 4.3399  | 3.42 | + | - |
| chr2R | 24903697 | 24904105 | RpL41    | 83   | 5.20345 | 3.22 | + | - |
| chr2R | 24927072 | 24927463 | pain     | 992  | 8.18505 | 4.94 | + | + |
| chr2R | 24928040 | 24928527 | pain     | 32   | 5.80675 | 3.62 | + | + |

|       |          |          |                    |      |         |      |   |   |
|-------|----------|----------|--------------------|------|---------|------|---|---|
| chr2R | 24940225 | 24940632 | CG2811             | 45   | 8.24287 | 4.97 | + | + |
| chr2R | 24969423 | 24969892 | RpL19              | 60   | 10.7476 | 4.87 | + | + |
| chr2R | 24969423 | 24969892 | CG3776             | 70   | 10.7476 | 4.87 | + | + |
| chr2R | 24983201 | 24983845 | emp                | 250  | 4.21193 | 3.03 | + | + |
| chr2R | 25011031 | 25011584 | zip                | 52   | 9.69002 | 4.54 | + | + |
| chr2R | 25084029 | 25084640 | gol                | 182  | 6.59913 | 3.92 | + | - |
| chr3L | 178389   | 178885   | Vdup1              | 89   | 5.68721 | 3.66 | + | - |
| chr3L | 224111   | 225093   | CG33229            | 84   | 7.29816 | 3.93 | + | + |
| chr3L | 224111   | 225093   | CR42862            | 84   | 7.29816 | 3.93 | + | + |
| chr3L | 246412   | 247068   | E(bx)              | 376  | 4.46194 | 3.38 | + | + |
| chr3L | 258169   | 258532   | wac                | 30   | 6.49421 | 3.76 | - | - |
| chr3L | 292190   | 292723   | RhoGEF3            | 240  | 6.36773 | 3.80 | + | + |
| chr3L | 319648   | 320010   | fwd                | 73   | 7.50488 | 4.14 | + | + |
| chr3L | 340937   | 341689   | mthl10             | 168  | 9.88804 | 5.04 | + | + |
| chr3L | 361409   | 361723   | CG1233             | 139  | 7.00941 | 4.27 | - | + |
| chr3L | 540604   | 540865   | klar               | 175  | 4.1344  | 3.25 | + | + |
| chr3L | 540604   | 540865   | CG17180            | 61   | 4.1344  | 3.25 | + | + |
| chr3L | 564332   | 564711   | Hipk               | 4837 | 7.59497 | 4.60 | + | - |
| chr3L | 603704   | 604042   | CG13893            | 103  | 7.55162 | 4.17 | + | + |
| chr3L | 606524   | 607201   | Reg-2              | 87   | 12.2846 | 6.07 | + | + |
| chr3L | 616417   | 617208   | CR42719            | 414  | 7.65493 | 4.96 | + | + |
| chr3L | 627927   | 628890   | CR43334            | 172  | 6.07228 | 3.88 | + | + |
| chr3L | 685409   | 685746   | ebd1               | 4    | 6.84115 | 4.05 | + | - |
| chr3L | 753536   | 754244   | hng3               | 1307 | 4.61041 | 3.37 | + | - |
| chr3L | 833021   | 833418   | snoRNA:Psi18S-1086 | 23   | 5.4164  | 3.42 | - | - |
| chr3L | 833021   | 833418   | CG13900            | 153  | 5.4164  | 3.42 | - | - |
| chr3L | 881562   | 882220   | CG13907            | 48   | 9.12391 | 4.67 | + | + |
| chr3L | 895289   | 896062   | CG34056            | 89   | 7.84551 | 4.74 | + | + |
| chr3L | 1204653  | 1204995  | CG9119             | 37   | 5.00679 | 3.61 | + | + |
| chr3L | 1313561  | 1313996  | CG9153             | 5    | 7.92301 | 3.81 | + | - |
| chr3L | 1334511  | 1335024  | CG2211             | 329  | 7.68006 | 4.23 | + | + |
| chr3L | 1334511  | 1335024  | l(3)02640          | 17   | 7.68006 | 4.23 | + | + |
| chr3L | 1517563  | 1518157  | Psa                | 108  | 6.58558 | 3.92 | + | - |
| chr3L | 1568209  | 1568705  | CG7879             | 253  | 6.03882 | 3.64 | + | + |
| chr3L | 1569019  | 1569339  | CG12004            | 31   | 6.38648 | 4.06 | + | + |
| chr3L | 1576443  | 1576802  | CG13917            | 98   | 6.19777 | 4.22 | + | + |
| chr3L | 1668596  | 1668858  | RpL23A             | 82   | 8.17404 | 4.35 | - | + |
| chr3L | 1810411  | 1810676  | GV1                | 33   | 8.96019 | 5.04 | + | - |
| chr3L | 1861638  | 1862294  | Rap1               | 4    | 4.46194 | 3.38 | + | + |
| chr3L | 1865221  | 1865683  | HBS1               | 211  | 5.22851 | 3.75 | - | + |
| chr3L | 1865221  | 1865683  | CG12025            | 22   | 5.22851 | 3.75 | - | + |
| chr3L | 1884639  | 1885224  | Aprt               | 5    | 8.90561 | 4.70 | + | - |
| chr3L | 1963928  | 1964664  | mv                 | 371  | 8.71301 | 4.91 | - | + |
| chr3L | 1963928  | 1964664  | SCOT               | 91   | 8.71301 | 4.91 | - | + |
| chr3L | 2150264  | 2150679  | zormin             | 1217 | 5.04262 | 3.52 | + | - |
| chr3L | 2151519  | 2151919  | zormin             | 40   | 7.88522 | 3.98 | + | - |
| chr3L | 2388799  | 2389234  | CG42787            | 208  | 6.63258 | 4.49 | - | - |
| chr3L | 2494396  | 2494728  | CG45186            | 6    | 5.01948 | 3.50 | + | - |
| chr3L | 2531309  | 2531749  | CG32295            | 4484 | 7.95686 | 4.65 | - | - |
| chr3L | 2554177  | 2554443  | Spn                | 90   | 6.29592 | 4.14 | + | + |
| chr3L | 2589411  | 2590092  | dos                | 56   | 4.81178 | 3.10 | + | + |
| chr3L | 2632723  | 2633238  | MEP-1              | 709  | 22.8691 | 7.97 | + | + |
| chr3L | 2635032  | 2635879  | MEP-1              | 296  | 4.14378 | 3.08 | + | + |
| chr3L | 2980819  | 2981427  | CG2107             | 55   | 6.25604 | 3.75 | - | - |
| chr3L | 3038207  | 3038460  | CG2162             | 14   | 5.32495 | 3.37 | + | + |
| chr3L | 3070658  | 3071363  | CG32486            | 132  | 11.9284 | 5.39 | + | + |
| chr3L | 3070658  | 3071363  | CG11486            | 161  | 11.9284 | 5.39 | + | + |
| chr3L | 3193187  | 3195585  | Hsp83              | 198  | 8.90561 | 4.70 | + | + |

|       |         |         |            |      |         |      |   |   |
|-------|---------|---------|------------|------|---------|------|---|---|
| chr3L | 3196011 | 3196754 | CG14966    | 1000 | 5.23656 | 3.63 | + | - |
| chr3L | 3198836 | 3199451 | CG32276    | 160  | 6.13669 | 3.79 | + | + |
| chr3L | 3198836 | 3199451 | gry        | 202  | 6.13669 | 3.79 | + | + |
| chr3L | 3222795 | 3223072 | RpL28      | 43   | 5.37529 | 3.49 | - | + |
| chr3L | 3336754 | 3337102 | kst        | 81   | 7.81438 | 4.30 | + | + |
| chr3L | 3338481 | 3339063 | kst        | 1539 | 15.463  | 7.03 | + | + |
| chr3L | 3418398 | 3418665 | sty        | 589  | 12.2113 | 5.67 | + | + |
| chr3L | 3626006 | 3626466 | dar1       | 156  | 13.0888 | 6.09 | + | + |
| chr3L | 3632189 | 3633161 | dar1       | 6599 | 6.02165 | 3.85 | + | + |
| chr3L | 3787691 | 3788186 | CG32264    | 99   | 4.95707 | 3.36 | + | + |
| chr3L | 3789123 | 3789452 | CG32264    | 1303 | 10.5033 | 5.52 | + | - |
| chr3L | 3846037 | 3846426 | Awh        | 29   | 6.7942  | 4.29 | + | - |
| chr3L | 4020977 | 4021595 | Mul1       | 13   | 4.39075 | 3.34 | - | - |
| chr3L | 4092773 | 4093072 | CG14990    | 309  | 10.5033 | 5.52 | + | - |
| chr3L | 4103644 | 4104162 | Fit1       | 427  | 6.43458 | 3.84 | + | + |
| chr3L | 4228185 | 4228964 | ImpL2      | 1359 | 10.8738 | 5.54 | + | + |
| chr3L | 4232182 | 4232568 | ImpL2      | 3797 | 8.28003 | 4.83 | + | - |
| chr3L | 4233876 | 4234327 | ImpL2      | 1980 | 10.5776 | 5.38 | + | - |
| chr3L | 4239498 | 4240020 | CG14997    | 392  | 5.68721 | 3.66 | + | + |
| chr3L | 4253763 | 4254197 | ago        | 35   | 5.05193 | 3.42 | + | + |
| chr3L | 4413842 | 4415413 | DOR        | 289  | 11.8317 | 5.20 | + | + |
| chr3L | 4543875 | 4544188 | CG11357    | 1904 | 5.4551  | 3.76 | + | - |
| chr3L | 4824581 | 4824837 | Dhc64C     | 969  | 10.1878 | 4.89 | + | + |
| chr3L | 4825610 | 4826078 | Dhc64C     | 91   | 8.26944 | 4.27 | - | + |
| chr3L | 4825610 | 4826078 | Aats-leu   | 74   | 8.26944 | 4.27 | - | + |
| chr3L | 5145992 | 5146321 | CG10671    | 68   | 8.24563 | 4.26 | - | - |
| chr3L | 5145992 | 5146321 | Aats-ala-m | 34   | 8.24563 | 4.26 | - | - |
| chr3L | 5355125 | 5355474 | lama       | 48   | 10.3049 | 5.41 | + | - |
| chr3L | 5563670 | 5564046 | Sucb       | 105  | 7.18203 | 3.98 | - | + |
| chr3L | 5563670 | 5564046 | Sras       | 23   | 7.18203 | 3.98 | - | + |
| chr3L | 5577089 | 5577453 | Msr-110    | 58   | 6.61192 | 4.05 | + | + |
| chr3L | 5610541 | 5610895 | Eaf6       | 2389 | 5.22851 | 3.63 | + | - |
| chr3L | 5750609 | 5751697 | DnaJ-1     | 738  | 7.09903 | 3.95 | + | + |
| chr3L | 5770215 | 5770897 | scny       | 545  | 8.38038 | 4.58 | + | + |
| chr3L | 5869608 | 5869908 | CG5568     | 1724 | 15.0827 | 7.06 | + | - |
| chr3L | 5902205 | 5902662 | QC         | 95   | 7.95686 | 4.65 | + | + |
| chr3L | 5923535 | 5923827 | Vap-33B    | 201  | 6.12636 | 4.18 | + | + |
| chr3L | 6184830 | 6185143 | D19B       | 53   | 6.03882 | 3.64 | + | - |
| chr3L | 6728226 | 6728530 | CR45417    | 113  | 5.33225 | 3.95 | + | - |
| chr3L | 6743587 | 6744140 | dikar      | 605  | 25.2049 | 8.29 | + | + |
| chr3L | 6752132 | 6752666 | velo       | 347  | 11.4263 | 5.31 | + | + |
| chr3L | 6977132 | 6977517 | CR32385    | 1056 | 7.72614 | 4.83 | + | - |
| chr3L | 6979815 | 6980264 | Galpai     | 79   | 7.65493 | 4.48 | + | - |
| chr3L | 7094658 | 7095398 | form3      | 46   | 8.64661 | 4.87 | + | + |
| chr3L | 7134286 | 7134729 | melt       | 68   | 11.8317 | 5.20 | + | + |
| chr3L | 7344888 | 7345333 | CG8596     | 54   | 12.9481 | 6.21 | + | + |
| chr3L | 7360682 | 7361404 | Sec63      | 684  | 11.0558 | 4.42 | + | + |
| chr3L | 7809673 | 7810191 | CG32369    | 218  | 12.0387 | 5.76 | + | + |
| chr3L | 7864943 | 7865427 | Pdp1       | 2363 | 4.8392  | 3.63 | + | + |
| chr3L | 7978923 | 7979335 | nmo        | 70   | 9.94006 | 4.65 | + | + |
| chr3L | 8091688 | 8092019 | CG7565     | 48   | 7.88864 | 4.09 | + | - |
| chr3L | 8151709 | 8152265 | CG13676    | 304  | 5.12257 | 3.57 | + | - |
| chr3L | 8158529 | 8159040 | CG42445    | 106  | 14.0823 | 6.56 | - | - |
| chr3L | 8186553 | 8187071 | ERR        | 13   | 8.48501 | 4.64 | + | + |
| chr3L | 8186553 | 8187071 | Atg18a     | 172  | 8.48501 | 4.64 | + | + |
| chr3L | 8309066 | 8309416 | Bl-1       | 315  | 4.87045 | 3.53 | - | - |
| chr3L | 8449799 | 8450616 | Gug        | 85   | 6.61555 | 4.19 | + | + |
| chr3L | 8575806 | 8576141 | CG6638     | 128  | 5.91102 | 3.91 | - | - |

|       |          |          |                   |      |         |       |   |   |
|-------|----------|----------|-------------------|------|---------|-------|---|---|
| chr3L | 8576543  | 8576802  | CG43078           | 88   | 4.89278 | 3.66  | - | - |
| chr3L | 8600752  | 8601125  | Nelf-E            | 95   | 14.0777 | 5.68  | - | - |
| chr3L | 8600752  | 8601125  | RpL14             | 31   | 14.0777 | 5.68  | - | - |
| chr3L | 8603894  | 8604255  | CG5989            | 56   | 12.2553 | 5.87  | + | + |
| chr3L | 8675493  | 8676160  | h                 | 64   | 6.17125 | 3.60  | + | + |
| chr3L | 8766239  | 8766618  | Fhos              | 13   | 7.80626 | 4.56  | + | - |
| chr3L | 8912414  | 8912677  | Tsp66E            | 8    | 4.82013 | 3.39  | + | - |
| chr3L | 8912414  | 8912677  | mfr               | 164  | 4.82013 | 3.39  | + | - |
| chr3L | 8913270  | 8913530  | mfr               | 677  | 4.46194 | 3.38  | + | - |
| chr3L | 8997942  | 8998267  | smg               | 130  | 5.87469 | 3.66  | + | + |
| chr3L | 8997942  | 8998267  | CG5087            | 64   | 5.87469 | 3.66  | + | + |
| chr3L | 9041197  | 9041446  | Doc1              | 20   | 4.39755 | 3.65  | + | - |
| chr3L | 9056443  | 9056809  | Argk              | 981  | 12.2113 | 5.67  | + | - |
| chr3L | 9134274  | 9134735  | bol               | 127  | 9.28024 | 4.74  | + | - |
| chr3L | 9134274  | 9134735  | Dhpr              | 27   | 9.28024 | 4.74  | + | - |
| chr3L | 9335772  | 9336081  | PGRP-LA           | 190  | 4.97968 | 3.59  | + | + |
| chr3L | 9349481  | 9349755  | PGRP-LF           | 13   | 5.83689 | 3.54  | + | + |
| chr3L | 9358793  | 9359223  | UGP               | 2    | 8.74927 | 4.63  | + | + |
| chr3L | 9358793  | 9359223  | CG32039           | 65   | 8.74927 | 4.63  | + | + |
| chr3L | 9509170  | 9509674  | CG3408            | 80   | 5.65147 | 3.64  | + | + |
| chr3L | 9511336  | 9511610  | RpS9              | 50   | 4.74497 | 3.15  | - | - |
| chr3L | 9695033  | 9695591  | CR45121           | 304  | 5.80675 | 3.62  | + | + |
| chr3L | 9695033  | 9695591  | CG6767            | 95   | 5.80675 | 3.62  | + | + |
| chr3L | 9698322  | 9698617  | Ubc4              | 159  | 5.72319 | 3.93  | + | + |
| chr3L | 9713802  | 9714825  | SH3PX1            | 416  | 5.95149 | 3.81  | + | + |
| chr3L | 9713802  | 9714825  | vsg               | 80   | 5.95149 | 3.81  | + | + |
| chr3L | 9853942  | 9854316  | RasGAP1           | 1173 | 8.23591 | 4.51  | + | + |
| chr3L | 9854683  | 9855367  | RasGAP1           | 432  | 8.63045 | 4.32  | + | + |
| chr3L | 9898263  | 9898578  | CG6707            | 17   | 5.91102 | 3.91  | - | + |
| chr3L | 10325049 | 10325749 | CR46006           | 1191 | 16.7495 | 6.80  | + | - |
| chr3L | 10332120 | 10332655 | CR46006           | 85   | 9.71963 | 4.68  | + | - |
| chr3L | 10363956 | 10364230 | CR46006           | 27   | 6.38228 | 3.70  | + | - |
| chr3L | 10630821 | 10631299 | CG42535           | 92   | 9.81123 | 4.86  | - | - |
| chr3L | 10630821 | 10631299 | CG34001           | 51   | 9.81123 | 4.86  | - | - |
| chr3L | 10630821 | 10631299 | hay               | 51   | 9.81123 | 4.86  | - | - |
| chr3L | 10630821 | 10631299 | CG34001           | 51   | 9.81123 | 4.86  | - | - |
| chr3L | 10665801 | 10666340 | simj              | 1251 | 9.22216 | 5.36  | + | + |
| chr3L | 10775681 | 10776060 | CG43245           | 4095 | 5.06126 | 3.65  | + | + |
| chr3L | 10867933 | 10868308 | tna               | 1743 | 10.8979 | 5.38  | + | + |
| chr3L | 10993471 | 10993760 | snoRNA:Me18S-G962 | 7881 | 6.51288 | 4.42  | - | - |
| chr3L | 11008961 | 11009537 | klu               | 56   | 6.76943 | 4.14  | + | + |
| chr3L | 11010344 | 11011261 | klu               | 1506 | 6.05096 | 4.13  | + | + |
| chr3L | 11062491 | 11062858 | CG32069           | 4    | 4.7384  | 3.56  | - | - |
| chr3L | 11070389 | 11070803 | Mocs1             | 9    | 7.75594 | 4.69  | + | + |
| chr3L | 11113458 | 11113846 | Sod               | 25   | 5.91102 | 3.91  | + | + |
| chr3L | 11119627 | 11121292 | FoxK              | 188  | 6.13849 | 3.92  | + | + |
| chr3L | 11119627 | 11121292 | mRpL2             | 125  | 6.13849 | 3.92  | + | + |
| chr3L | 11210631 | 11210989 | CG7600            | 87   | 4.89278 | 3.43  | - | + |
| chr3L | 11252114 | 11252493 | scyl              | 100  | 5.68099 | 3.66  | + | + |
| chr3L | 11487507 | 11488052 | chrb              | 201  | 7.06643 | 3.93  | + | + |
| chr3L | 11534537 | 11534862 | Mob2              | 216  | 4.59498 | 3.16  | + | - |
| chr3L | 11552641 | 11553700 | mir-4968          | 426  | 12.1726 | 5.34  | + | - |
| chr3L | 11552641 | 11553700 | Mob2              | 7    | 12.1726 | 5.34  | + | - |
| chr3L | 11562206 | 11562842 | Mob2              | 244  | 10.3493 | 4.97  | + | - |
| chr3L | 11562206 | 11562842 | CG7394            | 195  | 10.3493 | 4.97  | + | - |
| chr3L | 11648500 | 11648781 | CG7339            | 129  | 4.33525 | 3.20  | - | + |
| chr3L | 11696699 | 11697076 | CG11652           | 16   | 6.17125 | 3.60  | - | - |
| chr3L | 11707877 | 11708560 | CG11658           | 501  | 29.3999 | 10.08 | + | + |

|       |          |          |           |       |         |      |   |   |
|-------|----------|----------|-----------|-------|---------|------|---|---|
| chr3L | 12081501 | 12081917 | Sema-5c   | 63    | 7.23227 | 4.54 | + | - |
| chr3L | 12197572 | 12197872 | CG11529   | 22    | 4.36525 | 3.32 | + | - |
| chr3L | 12408359 | 12409294 | CG32103   | 52    | 8.90561 | 4.70 | + | + |
| chr3L | 12467983 | 12468381 | eyg       | 86    | 9.87797 | 5.19 | + | + |
| chr3L | 12490078 | 12491267 | CR45681   | 78    | 8.32052 | 4.70 | + | + |
| chr3L | 12490078 | 12491267 | CG10660   | 461   | 8.32052 | 4.70 | + | + |
| chr3L | 12514694 | 12515273 | sti       | 75    | 12.0348 | 5.76 | + | + |
| chr3L | 12514694 | 12515273 | CR45168   | 119   | 12.0348 | 5.76 | + | + |
| chr3L | 12514694 | 12515273 | tral      | 168   | 12.0348 | 5.76 | + | + |
| chr3L | 12526236 | 12527067 | eIF-2beta | 34    | 7.88206 | 4.61 | - | + |
| chr3L | 12580470 | 12580763 | ara       | 58    | 5.37529 | 3.49 | + | - |
| chr3L | 12627762 | 12628135 | CR32111   | 23    | 4.08868 | 3.15 | + | - |
| chr3L | 12692849 | 12693193 | mirr      | 607   | 4.82013 | 3.39 | + | + |
| chr3L | 13036717 | 13036996 | SRm160    | 4     | 6.00861 | 3.97 | - | - |
| chr3L | 13228449 | 13228873 | caps      | 77    | 9.83808 | 4.37 | + | - |
| chr3L | 13235982 | 13236381 | caps      | 7462  | 4.1784  | 3.20 | + | - |
| chr3L | 13389938 | 13390229 | Poc1      | 44    | 5.14201 | 3.47 | - | - |
| chr3L | 13494488 | 13495556 | Tgi       | 226   | 9.43589 | 4.82 | + | + |
| chr3L | 13497474 | 13498260 | Tgi       | 2102  | 11.5649 | 5.54 | + | + |
| chr3L | 13502574 | 13502960 | Spt20     | 62    | 12.6119 | 5.24 | + | - |
| chr3L | 13939124 | 13939491 | CG32137   | 66    | 10.6455 | 5.98 | + | + |
| chr3L | 14004969 | 14006139 | upSET     | 3184  | 7.65493 | 4.48 | + | + |
| chr3L | 14028553 | 14029107 | Ptip      | 489   | 6.25152 | 3.86 | + | + |
| chr3L | 14053044 | 14053451 | CG13484   | 241   | 7.78294 | 4.16 | + | + |
| chr3L | 14053044 | 14053451 | CG32138   | 106   | 7.78294 | 4.16 | + | + |
| chr3L | 14071683 | 14072080 | Pex1      | 42    | 11.6163 | 5.40 | + | + |
| chr3L | 14190332 | 14191002 | nuf       | 66    | 9.06313 | 4.78 | + | + |
| chr3L | 14212316 | 14212690 | CG7768    | 5701  | 15.3615 | 6.77 | - | - |
| chr3L | 14229796 | 14230107 | nuf       | 1238  | 4.28201 | 3.70 | - | - |
| chr3L | 14409360 | 14409818 | stwl      | 474   | 7.80626 | 4.56 | + | - |
| chr3L | 14427290 | 14427662 | bbg       | 93    | 11.8109 | 5.49 | + | + |
| chr3L | 14476708 | 14477188 | bbg       | 375   | 5.4551  | 3.76 | + | - |
| chr3L | 14537406 | 14537857 | Mpcp      | 70    | 7.55162 | 4.17 | + | + |
| chr3L | 14544227 | 14544662 | Gbs-70E   | 6403  | 5.37943 | 3.99 | + | - |
| chr3L | 14706605 | 14706961 | ome       | 52    | 7.19385 | 4.11 | + | + |
| chr3L | 14785285 | 14785701 | bmm       | 890   | 9.67245 | 4.93 | + | + |
| chr3L | 14804706 | 14805224 | CG17839   | 18    | 4.14378 | 3.08 | + | + |
| chr3L | 14819714 | 14820036 | CG17839   | 14739 | 7.09401 | 4.79 | + | + |
| chr3L | 15141831 | 15142559 | CR45396   | 305   | 6.13669 | 3.79 | + | + |
| chr3L | 15143781 | 15144068 | CR45397   | 126   | 6.94326 | 4.52 | - | + |
| chr3L | 15143781 | 15144068 | CG32147   | 133   | 6.94326 | 4.52 | - | + |
| chr3L | 15532458 | 15532731 | CG43248   | 1154  | 5.60713 | 3.52 | + | - |
| chr3L | 15982903 | 15983220 | Arl1      | 97    | 5.79011 | 3.84 | + | + |
| chr3L | 16011216 | 16011886 | mib1      | 196   | 5.83689 | 3.54 | + | + |
| chr3L | 16026345 | 16026647 | Notum     | 2982  | 5.80996 | 3.99 | + | + |
| chr3L | 16026962 | 16027395 | Notum     | 3641  | 9.18539 | 5.16 | + | + |
| chr3L | 16046607 | 16047011 | Diap1     | 36    | 11.6163 | 5.40 | + | + |
| chr3L | 16113577 | 16113890 | Taf4      | 53    | 9.06198 | 4.51 | + | + |
| chr3L | 16231734 | 16232242 | PDCD-5    | 24    | 6.36773 | 3.80 | - | + |
| chr3L | 16231734 | 16232242 | MED10     | 69    | 6.36773 | 3.80 | - | + |
| chr3L | 16233827 | 16234181 | l(3)72Dp  | 196   | 6.36927 | 4.18 | - | - |
| chr3L | 16378226 | 16378681 | roq       | 38    | 7.36908 | 4.33 | + | + |
| chr3L | 16381326 | 16381846 | CG4753    | 89    | 8.37142 | 4.58 | - | - |
| chr3L | 16409124 | 16409563 | fax       | 972   | 6.71948 | 3.98 | + | + |
| chr3L | 16574385 | 16574721 | mbf1      | 71    | 7.65493 | 4.10 | - | - |
| chr3L | 16584095 | 16584485 | UQCR-C2   | 12    | 8.16907 | 4.61 | - | + |
| chr3L | 16586855 | 16587388 | Syx8      | 59    | 10.0899 | 4.99 | - | - |
| chr3L | 16586855 | 16587388 | CG32163   | 40    | 10.0899 | 4.99 | - | - |



|       |          |          |           |       |         |      |   |   |
|-------|----------|----------|-----------|-------|---------|------|---|---|
| chr3L | 16647701 | 16648121 | Abl       | 72    | 6.25604 | 3.75 | + | - |
| chr3L | 16711411 | 16711828 | Lasp      | 55    | 7.76862 | 4.04 | + | - |
| chr3L | 16711411 | 16711828 | CG43954   | 55    | 7.76862 | 4.04 | + | - |
| chr3L | 16713479 | 16714333 | Dab       | 255   | 4.72558 | 3.33 | + | + |
| chr3L | 16745797 | 16746422 | CG42852   | 9568  | 6.36773 | 4.33 | + | - |
| chr3L | 16865205 | 16865696 | Lmpt      | 57    | 6.48117 | 3.86 | - | - |
| chr3L | 16890936 | 16891445 | Lmpt      | 18    | 6.41874 | 4.07 | + | + |
| chr3L | 16955364 | 16955710 | Nc73EF    | 32    | 5.55991 | 3.39 | - | - |
| chr3L | 17010123 | 17010554 | CG3764    | 2216  | 9.59887 | 4.90 | + | + |
| chr3L | 17012479 | 17012753 | CG3764    | 7     | 6.77478 | 4.62 | + | + |
| chr3L | 17379290 | 17379671 | Cad74A    | 99    | 5.79011 | 3.84 | + | - |
| chr3L | 17470020 | 17470573 | CG7589    | 73    | 5.2975  | 3.80 | + | - |
| chr3L | 17475877 | 17476384 | CG34250   | 87    | 12.6521 | 5.12 | + | + |
| chr3L | 17532908 | 17533738 | Nedd4     | 47    | 9.21106 | 4.23 | + | + |
| chr3L | 17557352 | 17557900 | CycT      | 239   | 9.23551 | 4.35 | + | + |
| chr3L | 17576241 | 17576545 | Eip74EF   | 92    | 5.42437 | 3.63 | + | - |
| chr3L | 17577453 | 17578046 | Eip74EF   | 1064  | 7.42562 | 4.10 | + | - |
| chr3L | 17584754 | 17585027 | Eip74EF   | 8281  | 5.68721 | 3.66 | + | - |
| chr3L | 17603789 | 17604238 | Eip74EF   | 15385 | 11.0768 | 5.31 | + | - |
| chr3L | 17612072 | 17612569 | Eip74EF   | 6985  | 14.7673 | 5.81 | + | - |
| chr3L | 17644276 | 17645038 | Pep       | 489   | 10.9423 | 5.24 | + | + |
| chr3L | 17653091 | 17653937 | Krn       | 542   | 5.57085 | 3.49 | + | + |
| chr3L | 17653091 | 17653937 | Ndfip     | 542   | 5.57085 | 3.49 | + | + |
| chr3L | 17659299 | 17659632 | CG7484    | 4927  | 5.12257 | 3.57 | + | - |
| chr3L | 17841109 | 17841518 | CG5577    | 119   | 9.19661 | 5.00 | + | + |
| chr3L | 17846186 | 17846636 | MED19     | 65    | 5.06013 | 3.23 | + | + |
| chr3L | 18087971 | 18088397 | CG34253   | 858   | 11.8279 | 5.66 | + | - |
| chr3L | 18105696 | 18106599 | CG13698   | 121   | 9.37364 | 4.40 | + | + |
| chr3L | 18105696 | 18106599 | mRpS26    | 550   | 9.37364 | 4.40 | + | + |
| chr3L | 18179659 | 18179993 | hid       | 5911  | 4.44639 | 3.49 | + | - |
| chr3L | 18460390 | 18460646 | CG32196   | 552   | 9.43589 | 4.82 | - | - |
| chr3L | 18625809 | 18626338 | MYPT-75D  | 17    | 9.93609 | 5.39 | + | + |
| chr3L | 18633051 | 18633507 | MYPT-75D  | 7427  | 9.24984 | 5.56 | + | - |
| chr3L | 18848408 | 18848720 | Indy      | 2278  | 9.74226 | 5.29 | + | - |
| chr3L | 18869243 | 18869572 | CG6852    | 46    | 7.59014 | 4.31 | - | - |
| chr3L | 18890135 | 18890492 | CG3961    | 169   | 4.55905 | 3.45 | + | + |
| chr3L | 18897873 | 18898426 | CG3902    | 57    | 10.8738 | 5.54 | + | + |
| chr3L | 18950488 | 18950816 | CG6836    | 21    | 6.83727 | 4.62 | - | - |
| chr3L | 19015926 | 19016995 | CG18136   | 13015 | 7.65493 | 4.48 | + | + |
| chr3L | 19062656 | 19063400 | CG3797    | 120   | 17.9453 | 6.40 | + | + |
| chr3L | 19062656 | 19063400 | CG6812    | 228   | 17.9453 | 6.40 | + | + |
| chr3L | 19294360 | 19295196 | fal       | 30    | 11.4033 | 5.81 | + | + |
| chr3L | 19562674 | 19563036 | CR45916   | 170   | 8.29452 | 4.40 | + | + |
| chr3L | 19585770 | 19586320 | CG9231    | 51    | 9.74417 | 5.12 | - | + |
| chr3L | 19585770 | 19586320 | CG9330    | 198   | 9.74417 | 5.12 | - | + |
| chr3L | 19618392 | 19618992 | l(3)76BDm | 321   | 6.7845  | 3.90 | + | + |
| chr3L | 19618392 | 19618992 | asf1      | 51    | 6.7845  | 3.90 | + | + |
| chr3L | 19687183 | 19687651 | CG8765    | 119   | 11.8131 | 6.02 | - | + |
| chr3L | 19687183 | 19687651 | Gbeta76C  | 164   | 11.8131 | 6.02 | - | + |
| chr3L | 19791443 | 19792288 | Gyc76C    | 1118  | 4.40661 | 3.24 | + | - |
| chr3L | 19791443 | 19792288 | CG42637   | 1118  | 4.40661 | 3.24 | + | - |
| chr3L | 19793297 | 19794013 | Gyc76C    | 157   | 5.27983 | 3.35 | + | + |
| chr3L | 19793297 | 19794013 | CG42637   | 157   | 5.27983 | 3.35 | + | + |
| chr3L | 19793297 | 19794013 | SREBP     | 522   | 5.27983 | 3.35 | + | + |
| chr3L | 19834063 | 19834487 | trc       | 6     | 6.16217 | 4.06 | + | + |
| chr3L | 19861158 | 19861645 | CR45433   | 23    | 9.06313 | 4.78 | + | - |
| chr3L | 19870816 | 19871586 | Rab8      | 54    | 7.30664 | 3.83 | + | + |
| chr3L | 19870816 | 19871586 | Usp32     | 114   | 7.30664 | 3.83 | + | + |

|       |          |          |             |       |         |      |   |   |
|-------|----------|----------|-------------|-------|---------|------|---|---|
| chr3L | 19929927 | 19930211 | RhoGDI      | 1304  | 9.69489 | 5.26 | + | - |
| chr3L | 20316795 | 20317447 | Spn77Ba     | 81    | 10.7628 | 5.16 | + | + |
| chr3L | 20316795 | 20317447 | CR43875     | 13    | 10.7628 | 5.16 | + | + |
| chr3L | 20353612 | 20354239 | CG5618      | 98    | 6.47648 | 4.24 | + | + |
| chr3L | 20474856 | 20475167 | isoQC       | 12    | 4.8964  | 4.01 | - | + |
| chr3L | 20525692 | 20526148 | CG4825      | 424   | 5.14201 | 3.70 | + | + |
| chr3L | 20675084 | 20675328 | kni         | 19316 | 4.02245 | 3.63 | + | - |
| chr3L | 20771338 | 20771812 | CG4042      | 1     | 9.97354 | 4.93 | + | + |
| chr3L | 20771338 | 20771812 | Pitslre     | 21    | 9.97354 | 4.93 | + | + |
| chr3L | 20785184 | 20786279 | CG11399     | 463   | 8.51588 | 4.38 | + | + |
| chr3L | 21027766 | 21028117 | CG10585     | 63    | 12.1967 | 5.50 | + | + |
| chr3L | 21049566 | 21049961 | siz         | 1502  | 5.06013 | 3.23 | + | - |
| chr3L | 21056626 | 21057082 | siz         | 2068  | 5.22851 | 3.63 | + | - |
| chr3L | 21057585 | 21058208 | siz         | 737   | 6.42437 | 4.36 | + | + |
| chr3L | 21172782 | 21173450 | chb         | 368   | 6.6517  | 4.21 | + | - |
| chr3L | 21172782 | 21173450 | AsnS        | 103   | 6.6517  | 4.21 | + | - |
| chr3L | 21175704 | 21176080 | chb         | 113   | 5.91102 | 3.91 | + | + |
| chr3L | 21285716 | 21286171 | CG12974     | 34    | 11.3444 | 5.60 | + | - |
| chr3L | 21285716 | 21286171 | pzg         | 102   | 11.3444 | 5.60 | + | - |
| chr3L | 21304303 | 21304966 | CG11309     | 80    | 9.97354 | 4.93 | + | - |
| chr3L | 21304303 | 21304966 | CG7632      | 42    | 9.97354 | 4.93 | + | - |
| chr3L | 21382370 | 21382674 | rgn         | 44    | 4.23076 | 3.14 | + | + |
| chr3L | 21483906 | 21484303 | Neu2        | 6513  | 12.5821 | 5.52 | + | - |
| chr3L | 21841021 | 21841385 | P5CDh1      | 64    | 10.5632 | 4.92 | + | + |
| chr3L | 22262646 | 22263106 | Rich        | 37    | 7.91708 | 4.78 | - | + |
| chr3L | 22460928 | 22461377 | laza        | 138   | 4.72558 | 3.33 | + | - |
| chr3L | 22773397 | 22774043 | SPoCk       | 227   | 8.53386 | 4.66 | + | - |
| chr3L | 22837865 | 22838679 | CG45428     | 1273  | 6.30792 | 3.57 | + | - |
| chr3L | 22863670 | 22864159 | CG33169     | 22    | 5.51221 | 3.46 | + | + |
| chr3L | 22894791 | 22895085 | CR44688     | 1175  | 5.94021 | 4.07 | + | - |
| chr3R | 4174673  | 4175231  | CG12581     | 327   | 6.75683 | 4.27 | + | + |
| chr3R | 4403372  | 4404089  | lost        | 612   | 4.84254 | 3.51 | + | + |
| chr3R | 4659458  | 4659895  | CG43427     | 216   | 6.147   | 3.69 | + | + |
| chr3R | 4717425  | 4718053  | CR44923     | 1525  | 7.90024 | 4.94 | - | - |
| chr3R | 4952602  | 4952861  | Ubc6        | 62    | 7.55162 | 4.17 | + | + |
| chr3R | 4955150  | 4955466  | CG14661     | 3     | 5.57085 | 3.83 | + | + |
| chr3R | 5086838  | 5087479  | corto       | 102   | 21.0133 | 6.88 | + | + |
| chr3R | 5363595  | 5363902  | Cerk        | 1770  | 4.52176 | 3.42 | + | - |
| chr3R | 5371613  | 5371942  | RpII18      | 34    | 12.0005 | 5.42 | + | + |
| chr3R | 5517043  | 5517747  | ltp-r83A    | 205   | 4.43971 | 3.07 | + | + |
| chr3R | 5547238  | 5547847  | CG2519      | 376   | 5.12257 | 3.57 | + | + |
| chr3R | 5600379  | 5601346  | kra         | 175   | 6.48702 | 3.76 | + | + |
| chr3R | 5623998  | 5624716  | Spec2       | 109   | 8.26944 | 4.27 | + | + |
| chr3R | 5623998  | 5624716  | CG2911      | 109   | 8.26944 | 4.27 | + | + |
| chr3R | 5623998  | 5624716  | RpL13A      | 239   | 8.26944 | 4.27 | + | + |
| chr3R | 5659119  | 5659540  | CR44093     | 146   | 6.83727 | 3.82 | + | - |
| chr3R | 5670911  | 5671365  | Atg17       | 1366  | 6.25712 | 3.98 | + | + |
| chr3R | 5672883  | 5673296  | Atg17       | 3348  | 6.83727 | 3.82 | + | - |
| chr3R | 5742086  | 5742393  | Sym         | 169   | 4.8392  | 3.40 | + | + |
| chr3R | 5778718  | 5779394  | jagn        | 27    | 5.74412 | 3.49 | + | + |
| chr3R | 6405567  | 6406005  | Dmtn        | 71    | 6.30792 | 3.57 | + | + |
| chr3R | 6406605  | 6406931  | gpp         | 9     | 8.73586 | 4.62 | + | - |
| chr3R | 6646682  | 6647138  | Taf1        | 8     | 5.70738 | 3.57 | + | + |
| chr3R | 7086369  | 7087143  | alphaTub84B | 78    | 6.58887 | 3.52 | + | + |
| chr3R | 7186602  | 7187239  | CG10055     | 310   | 8.40095 | 4.46 | + | + |
| chr3R | 7186602  | 7187239  | lap         | 10    | 8.40095 | 4.46 | + | + |
| chr3R | 7474472  | 7475074  | snRNA:7SK   | 255   | 14.8638 | 6.17 | + | + |
| chr3R | 7515520  | 7516080  | alpha-Est8  | 269   | 8.64661 | 4.87 | + | + |

|       |          |          |            |       |         |      |   |   |
|-------|----------|----------|------------|-------|---------|------|---|---|
| chr3R | 7523650  | 7523945  | alpha-Est7 | 49    | 5.22851 | 3.63 | + | - |
| chr3R | 7886803  | 7887237  | CG10092    | 8     | 7.90919 | 4.22 | + | - |
| chr3R | 7902520  | 7902782  | mRpS9      | 14    | 6.79217 | 4.29 | - | - |
| chr3R | 7913038  | 7913314  | CG2846     | 154   | 5.14201 | 3.47 | + | + |
| chr3R | 7947179  | 7947719  | dsx        | 15230 | 9.43589 | 4.82 | + | - |
| chr3R | 8030598  | 8030862  | CG2747     | 91    | 4.01981 | 3.10 | + | + |
| chr3R | 8030598  | 8030862  | CG10903    | 127   | 4.01981 | 3.10 | + | + |
| chr3R | 8352915  | 8353666  | Atg13      | 3466  | 7.51156 | 4.40 | + | - |
| chr3R | 8650761  | 8651096  | Mkk4       | 79    | 6.02268 | 3.74 | - | - |
| chr3R | 8650761  | 8651096  | SLIRP2     | 208   | 6.02268 | 3.74 | - | - |
| chr3R | 8820442  | 8820866  | CG9821     | 16    | 6.36773 | 3.80 | + | + |
| chr3R | 8820442  | 8820866  | CR43130    | 103   | 6.36773 | 3.80 | + | + |
| chr3R | 8846068  | 8846502  | pyd        | 74    | 13.3765 | 5.70 | + | + |
| chr3R | 9047139  | 9048260  | Rel        | 44    | 8.12213 | 4.09 | + | - |
| chr3R | 9053072  | 9054805  | Kdm2       | 30    | 7.76862 | 4.04 | + | + |
| chr3R | 9157879  | 9158391  | pum        | 391   | 5.37529 | 3.49 | + | - |
| chr3R | 9227699  | 9228033  | CR45196    | 359   | 4.69719 | 3.54 | + | - |
| chr3R | 9328834  | 9329155  | CG8861     | 508   | 12.8558 | 5.98 | - | - |
| chr3R | 9334687  | 9335408  | CG8866     | 463   | 5.09775 | 3.67 | + | + |
| chr3R | 9334687  | 9335408  | CG8121     | 8     | 5.09775 | 3.67 | + | + |
| chr3R | 9510106  | 9510503  | rump       | 30    | 4.81178 | 3.10 | - | + |
| chr3R | 9515799  | 9516524  | mRpL47     | 116   | 7.05922 | 4.16 | + | + |
| chr3R | 9515799  | 9516524  | CG8176     | 18    | 7.05922 | 4.16 | + | + |
| chr3R | 9515799  | 9516524  | JHDM2      | 18    | 7.05922 | 4.16 | + | + |
| chr3R | 9515799  | 9516524  | CG8176     | 18    | 7.05922 | 4.16 | + | + |
| chr3R | 9516886  | 9517222  | JHDM2      | 35    | 6.66726 | 4.21 | + | + |
| chr3R | 9516886  | 9517222  | CG8176     | 35    | 6.66726 | 4.21 | + | + |
| chr3R | 9532799  | 9533089  | by         | 65    | 7.00941 | 4.27 | + | + |
| chr3R | 9590757  | 9591304  | bocks      | 8     | 8.47092 | 4.24 | + | + |
| chr3R | 9645384  | 9646019  | Fst        | 541   | 11.7435 | 6.40 | - | - |
| chr3R | 9700348  | 9700674  | Unc-115a   | 545   | 5.84173 | 4.15 | - | - |
| chr3R | 9704456  | 9705628  | Unc-115a   | 213   | 7.68006 | 4.23 | + | + |
| chr3R | 9710899  | 9711331  | trbd       | 11    | 8.74927 | 4.63 | + | + |
| chr3R | 9710899  | 9711331  | dmt        | 115   | 8.74927 | 4.63 | + | + |
| chr3R | 9747192  | 9747740  | CG12948    | 174   | 5.56959 | 3.71 | + | + |
| chr3R | 9932247  | 9932687  | Glut4EF    | 3588  | 9.01905 | 4.91 | + | + |
| chr3R | 9946497  | 9946949  | Glut4EF    | 17796 | 9.03519 | 4.92 | + | + |
| chr3R | 10134073 | 10134465 | tw5        | 113   | 7.85637 | 4.19 | + | - |
| chr3R | 10170344 | 10170884 | Best1      | 244   | 9.2371  | 5.19 | + | + |
| chr3R | 10263954 | 10264638 | CG43143    | 52    | 12.3778 | 4.90 | + | + |
| chr3R | 10331227 | 10331605 | Bruce      | 10    | 7.19385 | 4.11 | + | + |
| chr3R | 10331227 | 10331605 | CG12818    | 217   | 7.19385 | 4.11 | + | + |
| chr3R | 10349889 | 10350233 | jumu       | 90    | 6.13669 | 3.79 | + | + |
| chr3R | 10377989 | 10378475 | Rfx        | 54    | 5.2894  | 3.55 | + | - |
| chr3R | 10380296 | 10380575 | Rfx        | 2313  | 4.91748 | 3.44 | + | - |
| chr3R | 10614040 | 10615018 | hth        | 104   | 6.9485  | 3.87 | + | - |
| chr3R | 10665012 | 10665352 | CG6465     | 12145 | 4.4393  | 3.68 | + | - |
| chr3R | 10862869 | 10863382 | CG6574     | 208   | 10.9911 | 5.26 | - | + |
| chr3R | 10868374 | 10868984 | SeIR       | 68    | 11.6651 | 5.59 | + | + |
| chr3R | 10868374 | 10868984 | Tsp86D     | 3     | 11.6651 | 5.59 | + | + |
| chr3R | 10881764 | 10882337 | Tpc1       | 15    | 6.24636 | 4.11 | + | + |
| chr3R | 11210096 | 11210536 | Tctp       | 17    | 5.27836 | 3.44 | + | + |
| chr3R | 11211276 | 11211721 | Tctp       | 1351  | 7.55162 | 4.17 | + | + |
| chr3R | 11216033 | 11216427 | RpS25      | 62    | 7.06643 | 3.93 | - | + |
| chr3R | 11243399 | 11245093 | CG17734    | 300   | 9.06313 | 4.78 | + | + |
| chr3R | 11243399 | 11245093 | CG5214     | 2     | 9.06313 | 4.78 | + | + |
| chr3R | 11431549 | 11431880 | RpL24-like | 3     | 5.14201 | 3.27 | - | + |
| chr3R | 11431549 | 11431880 | CG5276     | 152   | 5.14201 | 3.27 | - | + |

|       |          |          |           |      |         |       |   |   |
|-------|----------|----------|-----------|------|---------|-------|---|---|
| chr3R | 11581465 | 11582146 | wkd       | 490  | 7.44239 | 4.51  | + | + |
| chr3R | 11749591 | 11750139 | CG6923    | 166  | 7.42562 | 4.10  | + | - |
| chr3R | 11759422 | 11760009 | Lk6       | 516  | 6.02268 | 3.74  | + | + |
| chr3R | 11763671 | 11764717 | Lk6       | 90   | 9.19735 | 4.57  | + | + |
| chr3R | 11778095 | 11778517 | l(3)neo38 | 77   | 10.3493 | 4.97  | + | + |
| chr3R | 11786521 | 11787138 | CG17360   | 17   | 5.42437 | 3.75  | + | + |
| chr3R | 11796726 | 11797098 | Sbf       | 34   | 7.91708 | 4.78  | - | + |
| chr3R | 11819041 | 11819569 | glo       | 113  | 5.79209 | 3.61  | + | + |
| chr3R | 11819041 | 11819569 | COX5A     | 174  | 5.79209 | 3.61  | + | + |
| chr3R | 11868765 | 11869518 | CG6959    | 578  | 4.51847 | 3.12  | + | + |
| chr3R | 11888273 | 11888587 | mthl5     | 1213 | 5.09715 | 3.34  | + | - |
| chr3R | 11949647 | 11950096 | CG31211   | 48   | 6.13849 | 3.92  | + | + |
| chr3R | 11967396 | 11968027 | CG12213   | 232  | 5.06852 | 3.53  | + | + |
| chr3R | 11967396 | 11968027 | GC1       | 216  | 5.06852 | 3.53  | + | + |
| chr3R | 12090468 | 12090986 | ATP8B     | 31   | 6.51367 | 4.13  | + | + |
| chr3R | 12121113 | 12121498 | CG4702    | 6810 | 14.1977 | 6.42  | - | + |
| chr3R | 12368955 | 12369555 | GstD1     | 134  | 8.23591 | 4.51  | + | + |
| chr3R | 12405654 | 12406058 | Cyp9f2    | 141  | 7.45333 | 4.24  | + | + |
| chr3R | 12425625 | 12426279 | Pp1-87B   | 48   | 10.4937 | 5.18  | + | + |
| chr3R | 12465179 | 12465508 | CG5608    | 20   | 8.53386 | 4.66  | - | - |
| chr3R | 12505772 | 12506095 | Hsp70Bb   | 134  | 70.845  | 11.29 | + | - |
| chr3R | 12857550 | 12857887 | CG10126   | 45   | 9.00104 | 5.23  | + | + |
| chr3R | 12998027 | 12998441 | CG7518    | 16   | 7.68006 | 4.23  | + | + |
| chr3R | 13015561 | 13016402 | CtBP      | 864  | 6.17887 | 3.82  | + | - |
| chr3R | 13401489 | 13402042 | GILT1     | 30   | 10.4876 | 5.34  | + | + |
| chr3R | 13644916 | 13646320 | sqd       | 895  | 7.19385 | 4.11  | + | + |
| chr3R | 13661297 | 13661665 | B52       | 33   | 10.6904 | 5.12  | + | + |
| chr3R | 13683639 | 13684448 | fifl      | 130  | 7.55162 | 4.17  | + | + |
| chr3R | 13710627 | 13710994 | primo-1   | 30   | 8.32052 | 4.70  | - | - |
| chr3R | 13782238 | 13782801 | Dip-B     | 78   | 4.22062 | 3.04  | + | - |
| chr3R | 13794639 | 13795257 | CR45590   | 8557 | 7.19385 | 4.68  | + | - |
| chr3R | 14223835 | 14224294 | Sp212     | 147  | 6.02165 | 3.85  | + | - |
| chr3R | 14286566 | 14287083 | trx       | 9    | 9.37364 | 4.40  | + | - |
| chr3R | 14308033 | 14308499 | su(Hw)    | 419  | 6.36773 | 3.92  | + | + |
| chr3R | 14316006 | 14316417 | Set8      | 142  | 10.0274 | 4.82  | + | + |
| chr3R | 14326482 | 14327632 | Afti      | 336  | 9.42824 | 5.29  | + | + |
| chr3R | 14326482 | 14327632 | ATPsynE   | 42   | 9.42824 | 5.29  | + | + |
| chr3R | 14511367 | 14511992 | HtrA2     | 130  | 8.19003 | 4.35  | - | + |
| chr3R | 14511367 | 14511992 | mRpL11    | 5    | 8.19003 | 4.35  | - | + |
| chr3R | 14569164 | 14569705 | Cys       | 354  | 4.04281 | 3.12  | + | + |
| chr3R | 14714884 | 14715160 | kibra     | 9183 | 4.6863  | 3.42  | + | - |
| chr3R | 14740250 | 14740840 | eff       | 218  | 8.91381 | 4.57  | + | + |
| chr3R | 14741254 | 14741659 | eff       | 124  | 6.8328  | 4.04  | + | + |
| chr3R | 14741254 | 14741659 | jvl       | 138  | 6.8328  | 4.04  | + | + |
| chr3R | 14817894 | 14818338 | btsz      | 248  | 5.47582 | 3.55  | + | - |
| chr3R | 14903841 | 14904341 | VhaPPA1-1 | 30   | 8.85288 | 4.82  | - | + |
| chr3R | 15095561 | 15095980 | CG6966    | 186  | 9.28177 | 5.05  | + | + |
| chr3R | 15146869 | 15147833 | GlyS      | 147  | 4.77508 | 3.26  | + | + |
| chr3R | 15229162 | 15229574 | Art3      | 55   | 5.90548 | 3.79  | - | + |
| chr3R | 15287795 | 15288153 | Tm1       | 60   | 8.12089 | 3.98  | + | - |
| chr3R | 15290465 | 15290986 | CG45218   | 145  | 6.61493 | 3.71  | + | + |
| chr3R | 15290465 | 15290986 | Tm1       | 289  | 6.61493 | 3.71  | + | + |
| chr3R | 15328761 | 15329006 | ea        | 105  | 5.27892 | 3.98  | + | + |
| chr3R | 15342559 | 15343019 | CG6218    | 390  | 10.1441 | 5.01  | + | + |
| chr3R | 15356785 | 15357417 | Atg4b     | 300  | 5.39664 | 4.05  | + | + |
| chr3R | 15356785 | 15357417 | CG5044    | 4    | 5.39664 | 4.05  | + | + |
| chr3R | 15371754 | 15372419 | Ccm3      | 49   | 9.19735 | 4.57  | + | - |
| chr3R | 15371754 | 15372419 | CG6136    | 207  | 9.19735 | 4.57  | + | - |

|       |          |          |               |       |         |      |   |   |
|-------|----------|----------|---------------|-------|---------|------|---|---|
| chr3R | 15547354 | 15547712 | AOX3          | 217   | 4.24545 | 3.14 | + | - |
| chr3R | 15793362 | 15793792 | nsl1          | 71    | 5.14201 | 3.27 | + | + |
| chr3R | 15804077 | 15804424 | alpha-Man-IIb | 8     | 7.55162 | 4.17 | + | + |
| chr3R | 15972696 | 15973873 | mor           | 797   | 8.48178 | 4.37 | + | + |
| chr3R | 15972696 | 15973873 | Hel89B        | 413   | 8.48178 | 4.37 | + | + |
| chr3R | 16099106 | 16100026 | Akt1          | 696   | 4.82827 | 3.20 | + | + |
| chr3R | 16146289 | 16147250 | CG5903        | 78    | 4.66368 | 3.11 | - | + |
| chr3R | 16146289 | 16147250 | CG5916        | 364   | 4.66368 | 3.11 | - | + |
| chr3R | 16235359 | 16235977 | tara          | 7271  | 12.596  | 5.68 | + | + |
| chr3R | 16236412 | 16237427 | tara          | 6214  | 11.2747 | 5.10 | + | + |
| chr3R | 16242564 | 16243070 | tara          | 145   | 4.66368 | 3.11 | + | + |
| chr3R | 16253100 | 16253483 | tara          | 10476 | 6.33579 | 4.03 | + | - |
| chr3R | 16253974 | 16254815 | bor           | 9769  | 6.15136 | 3.80 | + | - |
| chr3R | 16280101 | 16280560 | gish          | 564   | 7.59225 | 4.60 | + | - |
| chr3R | 16305308 | 16306110 | Zip89B        | 75    | 6.03471 | 3.99 | + | + |
| chr3R | 16356404 | 16357184 | CG10311       | 146   | 9.12391 | 4.67 | + | + |
| chr3R | 16453473 | 16454035 | Pak3          | 14    | 6.51367 | 4.13 | + | + |
| chr3R | 16798563 | 16798932 | CR45750       | 1946  | 8.90561 | 4.70 | + | - |
| chr3R | 16969558 | 16970348 | Abd-B         | 1101  | 10.301  | 5.24 | + | - |
| chr3R | 16981802 | 16982128 | Ahcy89E       | 12    | 8.40095 | 4.33 | + | - |
| chr3R | 16987527 | 16987848 | CG18622       | 43    | 7.18203 | 3.98 | + | - |
| chr3R | 17056563 | 17056990 | Dad           | 1892  | 6.48211 | 4.25 | + | - |
| chr3R | 17065292 | 17065602 | Ns1           | 7231  | 4.58751 | 3.36 | + | - |
| chr3R | 17385829 | 17386458 | lute          | 471   | 4.04545 | 3.52 | + | + |
| chr3R | 17394138 | 17395200 | CREG          | 61    | 5.27836 | 3.44 | + | - |
| chr3R | 17682133 | 17682737 | alt           | 32    | 10.5865 | 5.07 | + | - |
| chr3R | 17682133 | 17682737 | CG7655        | 121   | 10.5865 | 5.07 | + | - |
| chr3R | 17700065 | 17701802 | CR46036       | 695   | 12.8558 | 5.98 | + | + |
| chr3R | 17703625 | 17704202 | CR46035       | 204   | 11.5371 | 4.94 | + | - |
| chr3R | 18021486 | 18021880 | CG7785        | 107   | 7.45333 | 4.24 | + | - |
| chr3R | 18121674 | 18122067 | sr            | 243   | 6.50972 | 4.27 | + | + |
| chr3R | 18226238 | 18227111 | Mdh2          | 573   | 6.96631 | 4.12 | + | + |
| chr3R | 18244265 | 18245314 | 14-3-3epsilon | 2073  | 17.5507 | 6.41 | + | + |
| chr3R | 18310239 | 18311069 | PKD           | 5     | 9.59887 | 4.90 | + | + |
| chr3R | 18396738 | 18397006 | Vha100-2      | 111   | 5.49106 | 3.79 | + | - |
| chr3R | 18396738 | 18397006 | Vti1b         | 177   | 5.49106 | 3.79 | + | - |
| chr3R | 18399544 | 18399882 | Vti1b         | 17    | 8.68247 | 4.74 | + | + |
| chr3R | 18659220 | 18659608 | CG31224       | 11    | 6.02165 | 3.85 | + | + |
| chr3R | 18914723 | 18915148 | Xrp1          | 74    | 8.82148 | 4.96 | + | + |
| chr3R | 18918004 | 18919224 | Xrp1          | 2     | 6.07228 | 3.55 | + | + |
| chr3R | 19027081 | 19027791 | NP15.6        | 44    | 5.70738 | 3.92 | - | + |
| chr3R | 19096365 | 19097015 | CG6040        | 131   | 6.48702 | 3.76 | + | - |
| chr3R | 19147494 | 19148207 | Ppcs          | 115   | 11.3189 | 4.98 | + | + |
| chr3R | 19211481 | 19212467 | cry           | 441   | 13.6308 | 5.98 | + | + |
| chr3R | 19491019 | 19491349 | CG15025       | 68    | 10.2115 | 5.93 | - | - |
| chr3R | 19620996 | 19621358 | CG6231        | 34    | 7.87163 | 4.46 | + | + |
| chr3R | 19641111 | 19641593 | subdued       | 130   | 23.9909 | 7.62 | + | + |
| chr3R | 19643950 | 19644565 | Vha13         | 187   | 8.53386 | 4.66 | + | + |
| chr3R | 19648094 | 19648950 | CG6195        | 52    | 5.93986 | 3.93 | - | + |
| chr3R | 19648094 | 19648950 | CG31220       | 128   | 5.93986 | 3.93 | - | + |
| chr3R | 20008290 | 20008964 | Hs6st         | 62    | 4.51595 | 3.21 | + | + |
| chr3R | 20008290 | 20008964 | MED25         | 496   | 4.51595 | 3.21 | + | + |
| chr3R | 20021042 | 20021405 | CG4433        | 24    | 5.4551  | 3.76 | + | + |
| chr3R | 20252376 | 20252949 | cic           | 132   | 13.8197 | 6.44 | + | + |
| chr3R | 20310328 | 20310603 | CG42668       | 1096  | 5.97337 | 3.95 | + | + |
| chr3R | 20556240 | 20557842 | att-ORFA      | 0     | 10.1188 | 5.15 | + | + |
| chr3R | 20579807 | 20580223 | EloB          | 202   | 6.03882 | 3.64 | - | + |
| chr3R | 20579807 | 20580223 | Srp14         | 62    | 6.03882 | 3.64 | - | + |

|       |          |          |                   |       |         |       |   |   |
|-------|----------|----------|-------------------|-------|---------|-------|---|---|
| chr3R | 20779834 | 20780156 | Syp               | 286   | 4.78896 | 3.37  | + | - |
| chr3R | 20821587 | 20822150 | CG17271           | 39    | 8.40095 | 4.33  | + | + |
| chr3R | 20850376 | 20850718 | RpS30             | 14    | 7.09668 | 4.18  | - | + |
| chr3R | 20948659 | 20949388 | Atpalpha          | 15    | 5.4551  | 3.76  | + | + |
| chr3R | 21064373 | 21064647 | Cortactin         | 83    | 5.47157 | 3.91  | + | - |
| chr3R | 21101885 | 21102235 | CG5745            | 47    | 8.64661 | 4.87  | - | + |
| chr3R | 21124308 | 21124790 | slmb              | 2928  | 6.22041 | 4.23  | + | - |
| chr3R | 21127435 | 21127965 | slmb              | 199   | 12.464  | 5.79  | + | + |
| chr3R | 21127435 | 21127965 | CG5793            | 59    | 12.464  | 5.79  | + | + |
| chr3R | 21268830 | 21269206 | Rab1              | 2     | 12.0929 | 5.03  | + | + |
| chr3R | 21296490 | 21298182 | Hsromega          | 569   | 12.7762 | 5.45  | + | + |
| chr3R | 21376318 | 21377264 | mod(mdg4)         | 280   | 6.01681 | 3.85  | + | + |
| chr3R | 21408297 | 21408680 | CheB93b           | 553   | 34.9355 | 12.43 | - | - |
| chr3R | 21487642 | 21488132 | Fancm             | 5507  | 7.80626 | 4.56  | - | - |
| chr3R | 21660788 | 21661156 | E2f1              | 73    | 11.3189 | 4.98  | + | - |
| chr3R | 22019066 | 22019452 | CG6439            | 39    | 8.74927 | 4.63  | + | + |
| chr3R | 22022832 | 22023776 | Mitofilin         | 4     | 7.87163 | 4.46  | + | + |
| chr3R | 22022832 | 22023776 | mRpL35            | 456   | 7.87163 | 4.46  | + | + |
| chr3R | 22035643 | 22036002 | pit               | 14    | 7.39314 | 4.64  | - | + |
| chr3R | 22362430 | 22362973 | Muted             | 2     | 7.18203 | 3.98  | + | + |
| chr3R | 22362430 | 22362973 | CG7071            | 2     | 7.18203 | 3.98  | + | + |
| chr3R | 22362430 | 22362973 | Muted             | 275   | 7.18203 | 3.98  | + | + |
| chr3R | 22470806 | 22473304 | Nrx-1             | 1805  | 6.01219 | 4.25  | + | - |
| chr3R | 22478486 | 22479703 | mir-4952          | 1434  | 9.607   | 5.58  | - | - |
| chr3R | 22482992 | 22483719 | mir-4952          | 2786  | 4.55905 | 3.45  | - | - |
| chr3R | 22528024 | 22528716 | CG5346            | 86    | 8.08878 | 4.88  | + | + |
| chr3R | 22547340 | 22548045 | AdipoR            | 18    | 8.67696 | 4.46  | - | - |
| chr3R | 22639551 | 22639874 | wake              | 15    | 4.58751 | 3.47  | - | - |
| chr3R | 22793961 | 22794303 | CG7031            | 10135 | 14.3876 | 7.16  | - | - |
| chr3R | 23117628 | 23117954 | Rassf             | 181   | 6.55247 | 3.79  | + | + |
| chr3R | 23157553 | 23158074 | unk               | 253   | 4.13788 | 3.08  | + | + |
| chr3R | 23226255 | 23227136 | cnc               | 127   | 12.7113 | 6.09  | + | + |
| chr3R | 23293038 | 23293451 | pnt               | 2053  | 5.69583 | 3.37  | + | - |
| chr3R | 23295042 | 23295801 | pnt               | 37    | 4.37187 | 3.44  | + | - |
| chr3R | 23348005 | 23348333 | DNApol-epsilon255 | 65    | 6.07228 | 3.88  | + | - |
| chr3R | 23358774 | 23359127 | RpS3              | 69    | 5.45744 | 3.65  | - | + |
| chr3R | 23374229 | 23374868 | CG42828           | 741   | 4.77743 | 3.59  | + | + |
| chr3R | 23386079 | 23386541 | CG4393            | 1571  | 7.65493 | 4.10  | + | - |
| chr3R | 23653778 | 23654680 | CG31145           | 15362 | 10.1356 | 5.50  | + | + |
| chr3R | 23723175 | 23723452 | CG10365           | 45    | 4.42754 | 3.25  | + | + |
| chr3R | 23819122 | 23819900 | CG33111           | 26    | 5.27836 | 3.44  | + | + |
| chr3R | 23819122 | 23819900 | eIF4G2            | 26    | 5.27836 | 3.44  | + | + |
| chr3R | 23819122 | 23819900 | CG33111           | 26    | 5.27836 | 3.44  | + | + |
| chr3R | 23889974 | 23890264 | Pli               | 53    | 5.26631 | 3.17  | + | + |
| chr3R | 23890670 | 23891161 | TfIIA-S           | 99    | 6.02165 | 3.85  | + | + |
| chr3R | 23993088 | 23993762 | Rab7              | 160   | 7.14896 | 4.35  | + | + |
| chr3R | 24031354 | 24032047 | KrT95D            | 27    | 13.7872 | 5.72  | + | + |
| chr3R | 24050629 | 24051064 | Atg6              | 119   | 4.77508 | 3.26  | + | - |
| chr3R | 24050629 | 24051064 | CG5991            | 119   | 4.77508 | 3.26  | + | - |
| chr3R | 24130113 | 24130475 | CG5463            | 31    | 7.01026 | 4.27  | - | - |
| chr3R | 24130113 | 24130475 | Tsc1              | 20    | 7.01026 | 4.27  | - | - |
| chr3R | 24151918 | 24152611 | p38a              | 148   | 4.91748 | 3.44  | + | + |
| chr3R | 24151918 | 24152611 | CG6178            | 123   | 4.91748 | 3.44  | + | + |
| chr3R | 24259252 | 24259888 | jar               | 26    | 5.97337 | 3.95  | + | - |
| chr3R | 24271098 | 24271504 | jar               | 55    | 21.5335 | 7.83  | + | + |
| chr3R | 24555243 | 24556091 | snRNA:U6:96Ac     | 684   | 43.9388 | 13.15 | + | - |
| chr3R | 24555243 | 24556091 | snRNA:U6:96Ab     | 684   | 43.9388 | 13.15 | + | - |
| chr3R | 24555243 | 24556091 | snRNA:U6:96Aa     | 684   | 43.9388 | 13.15 | + | - |

|       |          |          |               |      |         |       |   |   |
|-------|----------|----------|---------------|------|---------|-------|---|---|
| chr3R | 24556748 | 24557525 | snRNA:U6:96Ac | 134  | 40.9327 | 12.43 | + | - |
| chr3R | 24556748 | 24557525 | snRNA:U6:96Ab | 134  | 40.9327 | 12.43 | + | - |
| chr3R | 24556748 | 24557525 | snRNA:U6:96Aa | 134  | 40.9327 | 12.43 | + | - |
| chr3R | 24581893 | 24582677 | REPTOR        | 879  | 4.89568 | 3.54  | + | + |
| chr3R | 24586373 | 24586912 | mld           | 1083 | 18.0638 | 6.97  | + | + |
| chr3R | 24862753 | 24863150 | CG7016        | 19   | 6.29592 | 4.14  | + | - |
| chr3R | 24894432 | 24894878 | CG31121       | 112  | 11.438  | 6.02  | + | - |
| chr3R | 24894432 | 24894878 | CG11069       | 24   | 11.438  | 6.02  | + | - |
| chr3R | 24944704 | 24945380 | ssh           | 298  | 5.93686 | 3.59  | + | + |
| chr3R | 24944704 | 24945380 | Nmnat         | 18   | 5.93686 | 3.59  | + | + |
| chr3R | 25025027 | 25025576 | Hr96          | 19   | 10.0673 | 5.13  | + | + |
| chr3R | 25049726 | 25050732 | CG11791       | 222  | 5.21599 | 3.31  | + | - |
| chr3R | 25219076 | 25219394 | CG31103       | 44   | 11.3207 | 5.96  | + | + |
| chr3R | 25247201 | 25247643 | RpS27         | 1    | 10.5632 | 4.92  | + | + |
| chr3R | 25292723 | 25293079 | CG31098       | 151  | 8.86712 | 4.99  | + | + |
| chr3R | 25328449 | 25329108 | CHKov1        | 632  | 8.01716 | 4.53  | + | - |
| chr3R | 25482193 | 25482978 | XNP           | 64   | 6.96631 | 4.12  | + | + |
| chr3R | 25490639 | 25491092 | Dhap-at       | 35   | 13.2434 | 5.98  | + | + |
| chr3R | 25680395 | 25680797 | CG4743        | 39   | 5.12257 | 3.57  | - | + |
| chr3R | 25740325 | 25740812 | LpR2          | 26   | 5.12257 | 3.57  | + | + |
| chr3R | 26008399 | 26008940 | CR45039       | 1485 | 8.31168 | 4.41  | + | - |
| chr3R | 26099125 | 26099630 | dysf          | 569  | 4.23593 | 3.35  | + | - |
| chr3R | 26106790 | 26107239 | CG31324       | 109  | 11.6163 | 5.40  | + | + |
| chr3R | 26440482 | 26441205 | tx            | 231  | 6.84115 | 4.05  | + | - |
| chr3R | 26535953 | 26536582 | scrib         | 32   | 11.6163 | 5.40  | + | + |
| chr3R | 26799041 | 26799334 | TI            | 148  | 9.49686 | 4.71  | + | + |
| chr3R | 26862320 | 26863605 | Lerp          | 12   | 12.7053 | 5.57  | + | - |
| chr3R | 26862320 | 26863605 | IntS12        | 257  | 12.7053 | 5.57  | + | - |
| chr3R | 26866612 | 26867513 | ball          | 325  | 4.11881 | 3.07  | + | + |
| chr3R | 26866612 | 26867513 | His2Av        | 204  | 4.11881 | 3.07  | + | + |
| chr3R | 26881312 | 26881739 | T48           | 222  | 14.8429 | 6.16  | + | + |
| chr3R | 26988281 | 26988696 | CG31075       | 12   | 12.2094 | 6.23  | + | + |
| chr3R | 27069778 | 27070439 | spz           | 88   | 13.3508 | 6.61  | + | + |
| chr3R | 27071228 | 27071497 | spz           | 1369 | 5.69073 | 3.91  | + | - |
| chr3R | 27090985 | 27091462 | Cpr97Eb       | 92   | 7.40883 | 4.49  | + | - |
| chr3R | 27094359 | 27094847 | CG14259       | 49   | 4.40587 | 3.58  | + | + |
| chr3R | 27149765 | 27150326 | CG6051        | 864  | 5.04196 | 3.14  | + | + |
| chr3R | 27150695 | 27151115 | CG6051        | 179  | 11.246  | 5.23  | + | + |
| chr3R | 27157763 | 27158150 | grass         | 47   | 4.68441 | 3.21  | + | - |
| chr3R | 27165291 | 27165631 | CG34293       | 49   | 4.24601 | 3.25  | - | - |
| chr3R | 27228365 | 27228650 | CG42813       | 11   | 6.90459 | 4.21  | - | - |
| chr3R | 27706812 | 27707244 | CG12877       | 56   | 5.32495 | 3.37  | - | - |
| chr3R | 27742321 | 27743323 | Ets98B        | 704  | 6.97363 | 4.39  | + | - |
| chr3R | 28327972 | 28328569 | larp          | 211  | 7.58117 | 4.59  | + | - |
| chr3R | 28544547 | 28544899 | CG12413       | 38   | 9.34867 | 4.92  | + | + |
| chr3R | 28600343 | 28600753 | Hrb98DE       | 238  | 6.96631 | 4.12  | + | + |
| chr3R | 28844967 | 28845281 | spg           | 126  | 6.72338 | 3.87  | + | + |
| chr3R | 28858907 | 28859450 | Inx3          | 97   | 7.14896 | 4.35  | + | + |
| chr3R | 28897846 | 28898385 | Doa           | 4243 | 5.03438 | 3.63  | - | - |
| chr3R | 29122962 | 29123684 | CG11880       | 33   | 11.0747 | 5.64  | + | + |
| chr3R | 29147851 | 29148542 | CG11882       | 235  | 10.3385 | 5.26  | + | + |
| chr3R | 29147851 | 29148542 | Pglym78       | 46   | 10.3385 | 5.26  | + | + |
| chr3R | 29199709 | 29200659 | CG11899       | 183  | 10.7793 | 4.88  | + | + |
| chr3R | 29214328 | 29214715 | CR31044       | 7    | 6.6001  | 3.81  | + | + |
| chr3R | 29219971 | 29220410 | Ef1gamma      | 18   | 7.78294 | 4.16  | - | + |
| chr3R | 29493187 | 29493615 | CG2310        | 102  | 7.94962 | 4.36  | + | + |
| chr3R | 29503632 | 29504016 | Trc8          | 40   | 4.67071 | 3.52  | + | + |
| chr3R | 29723029 | 29723787 | Pcd           | 15   | 6.61192 | 4.05  | + | + |

|       |          |          |             |       |         |      |   |   |
|-------|----------|----------|-------------|-------|---------|------|---|---|
| chr3R | 29749024 | 29749400 | ATPsyngamma | 129   | 6.48702 | 3.98 | + | + |
| chr3R | 29749024 | 29749400 | yata        | 74    | 6.48702 | 3.98 | + | + |
| chr3R | 29772137 | 29772478 | kay         | 587   | 10.6196 | 5.24 | + | + |
| chr3R | 29772981 | 29773370 | kay         | 259   | 7.86886 | 4.32 | + | + |
| chr3R | 29798970 | 29799899 | CG7837      | 197   | 14.9577 | 6.39 | - | + |
| chr3R | 29798970 | 29799899 | Drice       | 500   | 14.9577 | 6.39 | - | + |
| chr3R | 29841318 | 29841658 | Cad99C      | 238   | 6.02268 | 3.74 | + | + |
| chr3R | 29861670 | 29862010 | RpS8        | 37    | 9.47294 | 4.99 | - | + |
| chr3R | 29868746 | 29869379 | Zip99C      | 347   | 5.7309  | 3.69 | + | + |
| chr3R | 29868746 | 29869379 | CG34133     | 122   | 5.7309  | 3.69 | + | + |
| chr3R | 29876925 | 29877255 | CG31038     | 2     | 5.6505  | 3.44 | + | + |
| chr3R | 30021918 | 30023092 | Mgat2       | 580   | 6.38648 | 3.93 | + | + |
| chr3R | 30021918 | 30023092 | RpS28a      | 153   | 6.38648 | 3.93 | + | + |
| chr3R | 30021918 | 30023092 | Axn         | 40    | 6.38648 | 3.93 | + | + |
| chr3R | 30045981 | 30046859 | RpL32       | 39    | 6.83727 | 3.82 | + | + |
| chr3R | 30045981 | 30046859 | CG7943      | 269   | 6.83727 | 3.82 | + | + |
| chr3R | 30133932 | 30134677 | Tpi         | 76    | 7.06643 | 3.93 | + | - |
| chr3R | 30171095 | 30171361 | CG31028     | 32    | 4.22282 | 3.46 | + | - |
| chr3R | 30423778 | 30424067 | CG15535     | 19    | 4.06253 | 3.04 | - | + |
| chr3R | 30423778 | 30424067 | mRpS18C     | 25    | 4.06253 | 3.04 | - | + |
| chr3R | 30424931 | 30425380 | CG15536     | 55    | 14.1559 | 6.81 | - | - |
| chr3R | 30459078 | 30459415 | CG2224      | 71    | 11.4468 | 5.65 | - | - |
| chr3R | 30527053 | 30527505 | jdp         | 167   | 9.187   | 4.70 | + | - |
| chr3R | 30563094 | 30563525 | tmod        | 54    | 6.13669 | 3.91 | + | + |
| chr3R | 30803286 | 30803903 | wts         | 3194  | 6.72171 | 4.25 | + | - |
| chr3R | 31130284 | 31130573 | CG15556     | 68    | 4.95253 | 3.70 | + | - |
| chr3R | 31218417 | 31219849 | ATPsynC     | 553   | 11.2747 | 5.10 | + | + |
| chr3R | 31218417 | 31219849 | mir-4949    | 232   | 11.2747 | 5.10 | + | + |
| chr3R | 31218417 | 31219849 | ATPsynC     | 26    | 11.2747 | 5.10 | + | + |
| chr3R | 31220630 | 31221880 | CG12054     | 540   | 7.92    | 4.22 | + | + |
| chr3R | 31457979 | 31458351 | lox         | 1705  | 9.43589 | 4.82 | + | - |
| chr3R | 31609473 | 31609890 | CycG        | 67    | 6.46663 | 3.85 | + | + |
| chr3R | 31611193 | 31611487 | Med         | 225   | 4.36525 | 3.32 | + | + |
| chr3R | 31711419 | 31712029 | ttk         | 2274  | 4.55989 | 3.34 | + | - |
| chr3R | 31712342 | 31713670 | ttk         | 791   | 8.63045 | 4.32 | + | - |
| chr3R | 31747462 | 31747961 | nero        | 298   | 4.72558 | 3.33 | + | + |
| chr3R | 31747462 | 31747961 | CG1910      | 214   | 4.72558 | 3.33 | + | + |
| chr3R | 31794362 | 31794850 | Acf         | 806   | 4.03669 | 3.02 | - | + |
| chr3R | 32068301 | 32068690 | Map205      | 27    | 6.41    | 3.62 | + | + |
| chr4  | 68593    | 69049    | pan         | 558   | 7.72842 | 4.38 | + | - |
| chrX  | 493265   | 493935   | CG17896     | 241   | 5.34678 | 3.83 | + | + |
| chrX  | 529768   | 530009   | CG4293      | 72    | 4.18334 | 3.76 | + | + |
| chrX  | 758869   | 759399   | CG5273      | 457   | 5.25105 | 3.64 | + | + |
| chrX  | 764926   | 765429   | RpL22       | 103   | 6.38648 | 4.06 | + | + |
| chrX  | 764926   | 765429   | CR44966     | 54    | 6.38648 | 4.06 | + | + |
| chrX  | 1236472  | 1236865  | CG3638      | 61    | 5.14201 | 3.47 | + | - |
| chrX  | 1399346  | 1399962  | CG11448     | 6739  | 9.00375 | 5.06 | + | + |
| chrX  | 1466642  | 1467467  | CG14777     | 49    | 7.44239 | 4.51 | + | + |
| chrX  | 1512636  | 1513100  | CG14795     | 179   | 5.69073 | 3.91 | + | + |
| chrX  | 1512636  | 1513100  | inc         | 87    | 5.69073 | 3.91 | + | + |
| chrX  | 1618180  | 1618587  | Mur2B       | 323   | 4.06794 | 3.24 | + | - |
| chrX  | 1624677  | 1625220  | br          | 2381  | 5.75535 | 4.24 | - | - |
| chrX  | 1952954  | 1953303  | Hr4         | 11250 | 8.60331 | 5.37 | + | + |
| chrX  | 2040973  | 2041336  | usp         | 114   | 7.12018 | 4.80 | + | + |
| chrX  | 2041652  | 2042418  | CG4313      | 295   | 8.28003 | 4.83 | + | + |
| chrX  | 2041652  | 2042418  | Actn        | 149   | 8.28003 | 4.83 | + | + |
| chrX  | 2041652  | 2042418  | usp         | 149   | 8.28003 | 4.83 | + | + |
| chrX  | 2041652  | 2042418  | Actn        | 149   | 8.28003 | 4.83 | + | + |



|      |         |         |           |      |         |       |   |   |
|------|---------|---------|-----------|------|---------|-------|---|---|
| chrX | 2050300 | 2050772 | moody     | 361  | 8.64661 | 4.87  | + | - |
| chrX | 2073225 | 2073657 | CG4199    | 5    | 6.25964 | 3.99  | - | - |
| chrX | 2094066 | 2094654 | csw       | 223  | 8.28003 | 4.83  | + | + |
| chrX | 2123099 | 2123988 | ph-d      | 6    | 16.2839 | 6.24  | + | + |
| chrX | 2134783 | 2135189 | ph-p      | 1547 | 9.19816 | 5.34  | + | + |
| chrX | 2136724 | 2137118 | ph-p      | 57   | 6.84115 | 4.05  | + | + |
| chrX | 2141344 | 2141933 | CG3835    | 215  | 5.34678 | 3.83  | + | + |
| chrX | 2222003 | 2222686 | Vinc      | 43   | 6.87287 | 4.19  | + | + |
| chrX | 2244424 | 2244757 | Or2a      | 1641 | 4.52332 | 3.67  | - | - |
| chrX | 2253786 | 2254504 | CG3091    | 249  | 4.66658 | 3.52  | + | + |
| chrX | 2317526 | 2317798 | CR34052   | 4650 | 5.12257 | 3.96  | + | - |
| chrX | 2684522 | 2685719 | per       | 98   | 5.75988 | 3.82  | + | + |
| chrX | 2789896 | 2793253 | CG32795   | 145  | 316.742 | 40.40 | + | - |
| chrX | 2795911 | 2796788 | w         | 49   | 316.742 | 35.45 | + | + |
| chrX | 2947899 | 2948160 | CG3603    | 76   | 4.89568 | 3.54  | - | - |
| chrX | 3382131 | 3382871 | CR44999   | 9249 | 6.01219 | 4.25  | + | - |
| chrX | 3382131 | 3382871 | Myc       | 9249 | 6.01219 | 4.25  | + | - |
| chrX | 3719512 | 3720260 | Rala      | 136  | 14.827  | 6.52  | + | + |
| chrX | 3719512 | 3720260 | Tlk       | 235  | 14.827  | 6.52  | + | + |
| chrX | 3742344 | 3743425 | Tlk       | 2726 | 7.94962 | 4.36  | + | + |
| chrX | 3811228 | 3811670 | ec        | 332  | 6.2318  | 4.24  | + | - |
| chrX | 3880658 | 3881228 | VhaAC39-1 | 213  | 6.07723 | 4.15  | + | + |
| chrX | 3965070 | 3965497 | lva       | 11   | 10.7744 | 5.85  | - | + |
| chrX | 4426858 | 4427139 | bi        | 195  | 4.37187 | 3.44  | + | + |
| chrX | 4684391 | 4684958 | Pp2C1     | 2185 | 5.93686 | 3.59  | + | - |
| chrX | 4687998 | 4688464 | ctp       | 27   | 4.40661 | 3.24  | + | + |
| chrX | 4956025 | 4956319 | CG15468   | 4937 | 8.82833 | 5.31  | + | - |
| chrX | 5046385 | 5047324 | ovo       | 1127 | 8.60331 | 5.37  | + | - |
| chrX | 5055245 | 5055533 | ovo       | 7013 | 5.12257 | 3.96  | + | - |
| chrX | 5063632 | 5063928 | ovo       | 75   | 7.84957 | 5.09  | + | - |
| chrX | 5063632 | 5063928 | CR44833   | 100  | 7.84957 | 5.09  | + | - |
| chrX | 5311958 | 5312310 | dhd       | 42   | 5.68104 | 3.78  | + | + |
| chrX | 5410578 | 5410846 | NAAT1     | 43   | 5.75535 | 4.24  | + | + |
| chrX | 5420506 | 5420983 | spoon     | 1    | 7.91708 | 4.78  | + | + |
| chrX | 5430079 | 5430647 | CG15784   | 6    | 10.9186 | 5.74  | + | + |
| chrX | 5690042 | 5690528 | cv        | 234  | 6.42063 | 4.52  | + | + |
| chrX | 5704918 | 5706203 | CG4096    | 6525 | 9.39687 | 5.65  | + | + |
| chrX | 5737721 | 5738279 | CG32758   | 69   | 5.00604 | 3.61  | + | + |
| chrX | 5745562 | 5745843 | IntS6     | 676  | 4.77743 | 3.59  | + | + |
| chrX | 5755438 | 5755956 | CG15771   | 43   | 7.20158 | 4.53  | + | + |
| chrX | 5907985 | 5908361 | CG12236   | 51   | 13.6829 | 7.02  | + | + |
| chrX | 5916039 | 5916847 | CG3011    | 36   | 4.08868 | 3.15  | + | - |
| chrX | 5988294 | 5988993 | CG5966    | 49   | 7.84957 | 5.09  | + | - |
| chrX | 6001198 | 6001880 | CR44498   | 238  | 6.42063 | 4.52  | + | - |
| chrX | 6278942 | 6279261 | Ubi-p5E   | 193  | 5.54547 | 3.82  | + | + |
| chrX | 6295125 | 6295457 | CG15891   | 43   | 6.73958 | 4.12  | - | - |
| chrX | 6295125 | 6295457 | CG3815    | 0    | 6.73958 | 4.12  | - | - |
| chrX | 6346788 | 6347199 | CG3847    | 63   | 6.57672 | 4.30  | + | + |
| chrX | 6743833 | 6744313 | RpL17     | 197  | 5.47582 | 3.91  | + | + |
| chrX | 6749268 | 6749765 | CR44964   | 1427 | 7.36422 | 4.62  | + | - |
| chrX | 6751742 | 6751999 | CR44964   | 3870 | 4.09583 | 3.83  | + | - |
| chrX | 6770776 | 6771240 | COQ7      | 131  | 4.44639 | 3.49  | - | + |
| chrX | 6998519 | 6999040 | Inx2      | 20   | 5.66244 | 4.17  | + | + |
| chrX | 7109735 | 7110356 | fz4       | 408  | 6.01219 | 4.25  | + | + |
| chrX | 7204556 | 7204947 | CG9650    | 8672 | 8.60331 | 5.37  | + | - |
| chrX | 7285960 | 7286467 | CG1677    | 27   | 14.9577 | 6.39  | + | + |
| chrX | 7285960 | 7286467 | CG2059    | 189  | 14.9577 | 6.39  | + | + |
| chrX | 7300184 | 7300755 | brk       | 7354 | 6.4369  | 4.22  | + | + |

|      |          |          |            |       |         |       |   |   |
|------|----------|----------|------------|-------|---------|-------|---|---|
| chrX | 7324357  | 7324621  | Dok        | 277   | 6.81043 | 4.44  | + | + |
| chrX | 7920376  | 7920775  | Ykt6       | 132   | 7.72398 | 5.01  | + | + |
| chrX | 7933368  | 7933854  | RpS14a     | 62    | 6.78704 | 4.43  | + | + |
| chrX | 7944612  | 7945321  | l(1)G0193  | 424   | 6.79217 | 4.29  | + | - |
| chrX | 8061017  | 8061547  | fs(1)h     | 282   | 5.01885 | 3.40  | + | + |
| chrX | 8115403  | 8116051  | Gclc       | 675   | 6.42063 | 4.52  | + | + |
| chrX | 8194557  | 8194883  | sdt        | 1521  | 6.43139 | 4.22  | + | - |
| chrX | 8409839  | 8410133  | lawc       | 165   | 9.28024 | 4.74  | + | + |
| chrX | 8561544  | 8562146  | Trf4-1     | 336   | 6.51367 | 4.13  | + | + |
| chrX | 8574203  | 8574719  | CG12065    | 23    | 4.82827 | 3.20  | + | + |
| chrX | 8863895  | 8864382  | CG12075    | 39    | 10.2115 | 5.93  | + | + |
| chrX | 8904032  | 8904350  | e(r)       | 1802  | 6.31356 | 4.45  | + | - |
| chrX | 9089565  | 9089866  | CG7033     | 253   | 5.36569 | 3.71  | + | + |
| chrX | 9282966  | 9283314  | c11.1      | 70    | 11.2406 | 6.11  | + | + |
| chrX | 9319044  | 9319320  | c12.1      | 7     | 5.12257 | 3.57  | - | + |
| chrX | 9554556  | 9554849  | RpS28b     | 18    | 4.89568 | 3.54  | + | + |
| chrX | 9579322  | 9580052  | LPCAT      | 91    | 4.36525 | 3.32  | + | - |
| chrX | 9684397  | 9685123  | nej        | 819   | 5.63369 | 3.87  | + | + |
| chrX | 9778499  | 9778938  | CG1354     | 119   | 11.3623 | 5.98  | + | + |
| chrX | 9884312  | 9884610  | CG9691     | 33    | 9.24984 | 5.56  | + | + |
| chrX | 10086208 | 10086820 | RhoU       | 148   | 7.08649 | 4.61  | + | + |
| chrX | 10486366 | 10486722 | CG32687    | 101   | 7.44239 | 4.51  | + | + |
| chrX | 10546572 | 10546872 | spri       | 1     | 4.78896 | 3.48  | + | + |
| chrX | 10767001 | 10768583 | Atg8a      | 70    | 12.007  | 5.58  | + | + |
| chrX | 10767001 | 10768583 | BTBD9      | 128   | 12.007  | 5.58  | + | + |
| chrX | 10772286 | 10772562 | CG15211    | 168   | 5.51837 | 4.08  | + | + |
| chrX | 10923748 | 10925693 | v          | 308   | 49.6358 | 14.76 | + | - |
| chrX | 11108422 | 11109083 | Hsp60      | 408   | 6.51367 | 4.13  | + | + |
| chrX | 11148337 | 11148645 | Ran        | 29    | 5.37943 | 3.99  | + | + |
| chrX | 11339611 | 11340222 | CG34348    | 192   | 5.14201 | 3.47  | + | + |
| chrX | 11339611 | 11340222 | Kap3       | 20    | 5.14201 | 3.47  | + | + |
| chrX | 11350527 | 11351350 | CG1737     | 574   | 4.23593 | 3.35  | + | + |
| chrX | 11423517 | 11424137 | Gs2        | 280   | 9.00104 | 5.23  | + | + |
| chrX | 11427055 | 11427728 | Gs2        | 3268  | 9.97354 | 5.60  | + | + |
| chrX | 11454144 | 11454402 | Evi5       | 136   | 5.12257 | 3.96  | + | + |
| chrX | 11505491 | 11505744 | Drak       | 11763 | 5.75432 | 4.23  | + | - |
| chrX | 11580132 | 11580878 | nod        | 188   | 5.22851 | 3.63  | - | + |
| chrX | 11681949 | 11682261 | bif        | 3168  | 7.21023 | 4.69  | + | - |
| chrX | 11694636 | 11695197 | PhKgamma   | 65    | 9.99071 | 5.42  | + | + |
| chrX | 11792372 | 11792836 | Ckillbeta  | 12    | 5.4551  | 3.76  | + | + |
| chrX | 12028765 | 12029189 | Usp7       | 64    | 4.09583 | 3.83  | + | + |
| chrX | 12654095 | 12654397 | Cklalpha   | 184   | 4.33525 | 3.20  | + | - |
| chrX | 12659053 | 12659573 | Tis11      | 232   | 6.50972 | 4.27  | + | + |
| chrX | 12659053 | 12659573 | CR33963    | 279   | 6.50972 | 4.27  | + | + |
| chrX | 12735108 | 12736247 | CR43963    | 4406  | 6.67237 | 4.52  | + | + |
| chrX | 12753871 | 12754290 | CR44619    | 2180  | 13.7266 | 6.81  | + | + |
| chrX | 12897270 | 12897535 | Pde9       | 152   | 4.9935  | 3.86  | - | - |
| chrX | 12900901 | 12901256 | CG32649    | 79    | 7.39314 | 4.64  | - | - |
| chrX | 13128124 | 13129083 | snmRNA:204 | 408   | 6.88557 | 4.49  | + | + |
| chrX | 13128124 | 13129083 | CG32638    | 572   | 6.88557 | 4.49  | + | + |
| chrX | 13128124 | 13129083 | CG15717    | 729   | 6.88557 | 4.49  | + | + |
| chrX | 13128124 | 13129083 | MFS10      | 795   | 6.88557 | 4.49  | + | + |
| chrX | 13128124 | 13129083 | CG15717    | 795   | 6.88557 | 4.49  | + | + |
| chrX | 13131488 | 13131742 | MFS10      | 136   | 4.52332 | 3.67  | + | + |
| chrX | 13257128 | 13257398 | mew        | 140   | 6.58482 | 4.31  | + | - |
| chrX | 13329598 | 13330159 | Jafrac1    | 71    | 6.6517  | 4.21  | + | + |
| chrX | 13404343 | 13405073 | GstT4      | 173   | 17.7828 | 8.19  | + | + |
| chrX | 13624454 | 13624892 | NFAT       | 13    | 6.36773 | 3.92  | + | + |

|      |          |          |           |       |         |      |   |   |
|------|----------|----------|-----------|-------|---------|------|---|---|
| chrX | 13641569 | 13642331 | NFAT      | 88    | 4.4488  | 3.62 | + | - |
| chrX | 13739580 | 13740160 | CG11151   | 80    | 6.25964 | 3.99 | + | + |
| chrX | 13821474 | 13822333 | Clic      | 681   | 7.29747 | 4.74 | + | + |
| chrX | 13845798 | 13846108 | AMPdeam   | 121   | 6.36773 | 4.33 | + | - |
| chrX | 13893540 | 13893838 | mamo      | 39581 | 5.36268 | 3.97 | + | - |
| chrX | 13933060 | 13933509 | mamo      | 22    | 7.72398 | 5.01 | + | + |
| chrX | 13933893 | 13934269 | mamo      | 691   | 7.72614 | 4.83 | + | + |
| chrX | 13994927 | 13995435 | ben       | 1254  | 5.09386 | 3.93 | + | - |
| chrX | 14261127 | 14261461 | CG1461    | 35    | 4.52332 | 3.67 | + | - |
| chrX | 14825902 | 14826409 | rut       | 20    | 7.03236 | 4.58 | + | + |
| chrX | 14839922 | 14840351 | Flo2      | 175   | 13.7138 | 6.59 | + | + |
| chrX | 15074886 | 15075213 | Lsd-2     | 1137  | 5.69393 | 3.91 | + | + |
| chrX | 15075935 | 15076295 | Lsd-2     | 59    | 6.94241 | 4.69 | + | + |
| chrX | 15082643 | 15083066 | CG33178   | 48    | 7.23227 | 4.54 | + | + |
| chrX | 15139177 | 15139840 | RpL37a    | 78    | 10.8738 | 5.54 | + | + |
| chrX | 15303229 | 15303713 | gce       | 2960  | 4.23593 | 3.35 | + | - |
| chrX | 15323267 | 15323760 | Top1      | 78    | 24.5366 | 9.43 | + | + |
| chrX | 15465385 | 15465747 | CG6299    | 13    | 8.8123  | 5.12 | + | + |
| chrX | 15811785 | 15812980 | sd        | 82    | 7.32583 | 4.31 | + | - |
| chrX | 15852865 | 15853267 | UBL3      | 5     | 5.34678 | 3.83 | - | - |
| chrX | 16104669 | 16104997 | CG42353   | 37    | 6.25964 | 3.99 | + | + |
| chrX | 16104669 | 16104997 | CG42354   | 37    | 6.25964 | 3.99 | + | + |
| chrX | 16104669 | 16104997 | CG42353   | 37    | 6.25964 | 3.99 | + | + |
| chrX | 16270707 | 16271173 | Mfe2      | 68    | 8.26282 | 4.98 | + | - |
| chrX | 16275512 | 16276027 | kat80     | 269   | 8.32052 | 4.70 | - | + |
| chrX | 16281780 | 16282192 | eas       | 3409  | 12.3623 | 6.52 | + | - |
| chrX | 16422641 | 16423207 | hang      | 15    | 7.65493 | 4.48 | + | + |
| chrX | 16559623 | 16560143 | Pp2B-14D  | 3     | 9.97001 | 5.79 | + | + |
| chrX | 16637152 | 16637509 | Rok       | 97    | 5.06023 | 4.12 | + | + |
| chrX | 16637782 | 16638117 | RpS19a    | 21    | 4.27117 | 3.26 | + | + |
| chrX | 16792184 | 16792636 | CG4768    | 155   | 6.15777 | 4.35 | + | + |
| chrX | 17147944 | 17148499 | RpS5a     | 1     | 6.87287 | 4.48 | + | + |
| chrX | 17148849 | 17149309 | CG5010    | 96    | 7.12018 | 4.80 | + | + |
| chrX | 17349271 | 17349582 | CR43491   | 29582 | 5.75535 | 4.24 | + | - |
| chrX | 17577479 | 17577796 | CR44124   | 1057  | 5.86504 | 4.16 | + | - |
| chrX | 17579695 | 17580139 | CG12991   | 11    | 6.01219 | 4.25 | + | + |
| chrX | 17581602 | 17581946 | CG12991   | 1871  | 7.00632 | 4.73 | + | - |
| chrX | 17698338 | 17698850 | chas      | 115   | 4.55905 | 3.57 | + | + |
| chrX | 17830733 | 17831189 | CG6398    | 113   | 9.39687 | 5.65 | + | + |
| chrX | 17830733 | 17831189 | CR44691   | 154   | 9.39687 | 5.65 | + | + |
| chrX | 17839717 | 17840051 | e(y)1     | 2266  | 6.22041 | 4.23 | + | - |
| chrX | 17849997 | 17850393 | CG15814   | 220   | 7.12536 | 4.64 | - | + |
| chrX | 17910757 | 17911082 | CG6847    | 605   | 8.82833 | 5.31 | + | + |
| chrX | 17911354 | 17911712 | CG6847    | 18    | 4.40661 | 3.24 | + | + |
| chrX | 18320980 | 18321477 | CG6023    | 155   | 5.54547 | 3.82 | + | + |
| chrX | 18366196 | 18366666 | CrebB     | 71    | 9.97354 | 4.93 | + | - |
| chrX | 18368428 | 18368947 | CR43686   | 1522  | 6.08707 | 4.15 | + | - |
| chrX | 18370718 | 18371079 | CrebB     | 90    | 6.76984 | 4.42 | + | + |
| chrX | 18385112 | 18385379 | betaCOP   | 44    | 6.07228 | 3.55 | - | - |
| chrX | 18483493 | 18484002 | Hayan     | 57    | 9.607   | 5.58 | + | + |
| chrX | 18489359 | 18489675 | CG15046   | 32    | 4.1784  | 3.42 | + | + |
| chrX | 18692942 | 18693223 | Cyp18a1   | 10    | 5.12257 | 3.96 | + | - |
| chrX | 18783532 | 18783898 | CG18259   | 247   | 4.3399  | 3.42 | - | - |
| chrX | 18857131 | 18857725 | CG7322    | 65    | 5.34678 | 3.83 | + | - |
| chrX | 19153057 | 19153835 | RhoGAP18B | 15    | 6.07723 | 4.15 | + | + |
| chrX | 19353637 | 19353994 | kek5      | 492   | 6.15777 | 4.20 | + | + |
| chrX | 19495315 | 19496082 | CG14200   | 169   | 6.03882 | 3.64 | + | + |
| chrX | 19495315 | 19496082 | Pfrx      | 169   | 6.03882 | 3.64 | + | + |

|      |          |          |           |       |         |      |   |   |
|------|----------|----------|-----------|-------|---------|------|---|---|
| chrX | 19495315 | 19496082 | CR44340   | 223   | 6.03882 | 3.64 | + | + |
| chrX | 19496858 | 19497188 | Pfrx      | 305   | 7.09668 | 4.18 | + | + |
| chrX | 19498030 | 19498657 | Pfrx      | 171   | 4.92486 | 3.68 | + | - |
| chrX | 19521746 | 19522441 | I(1)G0156 | 347   | 10.247  | 5.56 | + | + |
| chrX | 19521746 | 19522441 | CoRest    | 59    | 10.247  | 5.56 | + | + |
| chrX | 19681480 | 19682020 | dome      | 1621  | 6.51288 | 4.42 | + | - |
| chrX | 19683001 | 19683496 | dome      | 357   | 6.40503 | 4.20 | + | + |
| chrX | 19697320 | 19697644 | Cdc42     | 401   | 5.71487 | 4.21 | + | + |
| chrX | 19743733 | 19744536 | COX6B     | 305   | 6.93675 | 4.37 | + | + |
| chrX | 19743733 | 19744536 | CG18809   | 18    | 6.93675 | 4.37 | + | + |
| chrX | 19743733 | 19744536 | COX6B     | 18    | 6.93675 | 4.37 | + | + |
| chrX | 19743733 | 19744536 | CG33932   | 77    | 6.93675 | 4.37 | + | + |
| chrX | 19743733 | 19744536 | Rpp20     | 77    | 6.93675 | 4.37 | + | + |
| chrX | 19743733 | 19744536 | CG33932   | 77    | 6.93675 | 4.37 | + | + |
| chrX | 19743733 | 19744536 | Rpp20     | 77    | 6.93675 | 4.37 | + | + |
| chrX | 19848275 | 19848546 | pico      | 98    | 4.46194 | 3.38 | + | - |
| chrX | 19851869 | 19852353 | pico      | 146   | 7.33035 | 4.45 | + | + |
| chrX | 19851869 | 19852353 | Nup205    | 8     | 7.33035 | 4.45 | + | + |
| chrX | 19865996 | 19866328 | Hers      | 13    | 5.37529 | 3.49 | + | + |
| chrX | 19886941 | 19887669 | Hers      | 330   | 8.45273 | 4.92 | + | + |
| chrX | 20468259 | 20468511 | GstT3     | 17    | 4.4488  | 3.62 | + | + |
| chrX | 21042952 | 21043253 | Mgstl     | 85    | 5.57529 | 3.97 | + | + |
| chrX | 21120391 | 21120725 | CR44374   | 331   | 8.60331 | 5.37 | + | - |
| chrX | 21280753 | 21281166 | CG32521   | 198   | 5.6063  | 4.14 | + | + |
| chrX | 21324073 | 21324579 | CG1486    | 469   | 4.24144 | 3.35 | + | + |
| chrX | 21604776 | 21605054 | GCS2alpha | 69    | 4.3399  | 3.42 | - | - |
| chrX | 22372019 | 22372410 | CG14621   | 72050 | 5.14201 | 3.27 | - | - |
| chrX | 22456147 | 22456492 | Usp2      | 123   | 6.02165 | 3.85 | + | + |

**Supplementary Table 4** CBP binding sites

The regions indicated by 'Start' and 'End' represent the called peak region, the results of which were indicated as 'Q score' and 'Fold enrichment'.

| Chromosome | Start  | End    | Gene Symbol | Distance to TSS (bp) | Q score (-log <sub>10</sub> (q value)) | Fold change |
|------------|--------|--------|-------------|----------------------|----------------------------------------|-------------|
| chr2L      | 5332   | 6132   | CG11023     | 1778                 | 226.615                                | 18.04       |
| chr2L      | 66317  | 67638  | CR45340     | 649                  | 316.742                                | 21.51       |
| chr2L      | 66317  | 67638  | dbp         | 76                   | 316.742                                | 21.51       |
| chr2L      | 72203  | 74153  | galectin    | 149                  | 316.742                                | 22.14       |
| chr2L      | 72203  | 74153  | CR44987     | 1301                 | 316.742                                | 22.14       |
| chr2L      | 72203  | 74153  | galectin    | 1593                 | 316.742                                | 22.14       |
| chr2L      | 107720 | 109527 | Sam-S       | 22                   | 158.614                                | 11.71       |
| chr2L      | 120439 | 120788 | CG4822      | 58                   | 13.0388                                | 3.47        |
| chr2L      | 128206 | 129673 | CG3164      | 80                   | 316.742                                | 25.89       |
| chr2L      | 131406 | 132265 | Gs1         | 126                  | 104.685                                | 10.96       |
| chr2L      | 158876 | 159432 | spen        | 88                   | 61.3134                                | 6.93        |
| chr2L      | 160407 | 162277 | spen        | 2010                 | 316.742                                | 18.51       |
| chr2L      | 165514 | 165797 | spen        | 6636                 | 8.63164                                | 2.66        |
| chr2L      | 166144 | 167226 | spen        | 7933                 | 196.427                                | 14.25       |
| chr2L      | 179139 | 179471 | spen        | 3509                 | 35.9383                                | 5.73        |
| chr2L      | 181230 | 181582 | spen        | 1253                 | 7.11056                                | 2.53        |
| chr2L      | 182744 | 183158 | spen        | 38                   | 12.7916                                | 3.20        |
| chr2L      | 220396 | 220969 | CR44220     | 1039                 | 226.442                                | 14.52       |
| chr2L      | 221261 | 224590 | kis         | 260                  | 316.742                                | 30.04       |
| chr2L      | 221261 | 224590 | CR44222     | 1296                 | 316.742                                | 30.04       |
| chr2L      | 246393 | 247901 | CR44218     | 2150                 | 316.742                                | 26.67       |
| chr2L      | 248173 | 248523 | CR44218     | 614                  | 14.2064                                | 3.38        |
| chr2L      | 248863 | 250978 | CR44218     | 413                  | 316.742                                | 34.11       |
| chr2L      | 248863 | 250978 | kis         | 1502                 | 316.742                                | 34.11       |
| chr2L      | 267178 | 268154 | CG17075     | 394                  | 45.0368                                | 6.52        |
| chr2L      | 277020 | 277364 | CG17078     | 5                    | 7.17004                                | 2.57        |
| chr2L      | 285492 | 285891 | CG3625      | 31                   | 46.9309                                | 6.00        |
| chr2L      | 286202 | 286721 | CR46263     | 119                  | 8.18511                                | 2.60        |
| chr2L      | 286202 | 286721 | CG3625      | 268                  | 8.18511                                | 2.60        |
| chr2L      | 291690 | 291962 | CG3625      | 14                   | 20.8614                                | 4.62        |
| chr2L      | 295042 | 295468 | Hop         | 92                   | 19.7395                                | 4.20        |
| chr2L      | 297824 | 298602 | Pi3K21B     | 74                   | 21.8615                                | 3.85        |
| chr2L      | 305824 | 307281 | Plc21C      | 630                  | 316.742                                | 20.34       |
| chr2L      | 309729 | 310560 | Plc21C      | 71                   | 316.742                                | 24.52       |
| chr2L      | 377523 | 378334 | al          | 253                  | 316.742                                | 36.01       |
| chr2L      | 412589 | 413626 | AP-2alpha   | 48                   | 66.8543                                | 8.65        |
| chr2L      | 414264 | 415290 | AP-2alpha   | 70                   | 42.8481                                | 5.75        |
| chr2L      | 414264 | 415290 | ebi         | 219                  | 42.8481                                | 5.75        |
| chr2L      | 430797 | 432053 | ex          | 64                   | 194.628                                | 13.92       |
| chr2L      | 434291 | 436390 | ex          | 4654                 | 269.922                                | 17.96       |
| chr2L      | 452867 | 453296 | crq         | 91                   | 8.4872                                 | 2.63        |
| chr2L      | 452867 | 453296 | CG4164      | 174                  | 8.4872                                 | 2.63        |
| chr2L      | 455388 | 455742 | CG4133      | 8                    | 42.3703                                | 7.39        |
| chr2L      | 470198 | 473172 | CG4297      | 96                   | 316.742                                | 28.96       |
| chr2L      | 470198 | 473172 | MED15       | 716                  | 316.742                                | 28.96       |
| chr2L      | 478696 | 482407 | cbt         | 1212                 | 316.742                                | 19.78       |
| chr2L      | 483275 | 483819 | cbt         | 3860                 | 87.0137                                | 9.19        |
| chr2L      | 484165 | 484989 | cbt         | 4683                 | 85.5559                                | 8.64        |
| chr2L      | 485478 | 485950 | ush         | 5105                 | 22.5253                                | 3.95        |
| chr2L      | 485478 | 485950 | CR46258     | 5105                 | 22.5253                                | 3.95        |
| chr2L      | 486945 | 487226 | ush         | 3741                 | 24.0577                                | 4.61        |
| chr2L      | 486945 | 487226 | CR46258     | 3741                 | 24.0577                                | 4.61        |
| chr2L      | 487705 | 488275 | ush         | 2983                 | 21.2144                                | 4.37        |
| chr2L      | 487705 | 488275 | CR46258     | 2983                 | 21.2144                                | 4.37        |
| chr2L      | 490115 | 491219 | ush         | 96                   | 316.742                                | 47.32       |
| chr2L      | 490115 | 491219 | CR46258     | 96                   | 316.742                                | 47.32       |
| chr2L      | 491915 | 492169 | CR46258     | 158                  | 17.9796                                | 4.02        |
| chr2L      | 516342 | 516949 | ush         | 6735                 | 38.4309                                | 6.93        |
| chr2L      | 523007 | 524028 | ush         | 34                   | 251.965                                | 15.35       |
| chr2L      | 548091 | 548466 | Ets21C      | 1189                 | 12.6052                                | 3.70        |
| chr2L      | 552260 | 552984 | Ets21C      | 184                  | 316.742                                | 23.42       |
| chr2L      | 559511 | 559914 | Tspo        | 63                   | 17.3478                                | 3.74        |
| chr2L      | 594516 | 595436 | Gsc         | 223                  | 198.202                                | 20.66       |
| chr2L      | 701561 | 702385 | CR44988     | 8595                 | 286.076                                | 22.23       |
| chr2L      | 710601 | 711063 | CR44988     | 141                  | 14.1753                                | 3.56        |
| chr2L      | 714750 | 715777 | ds          | 305                  | 316.742                                | 30.61       |
| chr2L      | 734796 | 736086 | Eaat2       | 6039                 | 64.5491                                | 8.73        |
| chr2L      | 741592 | 742017 | Eaat2       | 35                   | 49.9508                                | 6.67        |
| chr2L      | 821309 | 822133 | CG3662      | 478                  | 18.0985                                | 3.88        |

|       |         |         |                   |       |         |       |
|-------|---------|---------|-------------------|-------|---------|-------|
| chr2L | 825802  | 826820  | CG3862            | 727   | 99.2901 | 9.46  |
| chr2L | 825802  | 826820  | dock              | 620   | 99.2901 | 9.46  |
| chr2L | 839365  | 841125  | drongo            | 2015  | 65.7074 | 6.95  |
| chr2L | 843910  | 844782  | drongo            | 1308  | 30.2056 | 4.93  |
| chr2L | 845191  | 846890  | drongo            | 2824  | 139.737 | 12.48 |
| chr2L | 847600  | 847992  | CR44060           | 2951  | 39.8637 | 6.14  |
| chr2L | 850649  | 851221  | CR44060           | 326   | 55.208  | 6.21  |
| chr2L | 850649  | 851221  | drongo            | 44    | 55.208  | 6.21  |
| chr2L | 852732  | 853148  | kraken            | 41    | 28.9827 | 4.63  |
| chr2L | 865292  | 866457  | snRNA:Me28S-U123( | 353   | 101.993 | 8.76  |
| chr2L | 865292  | 866457  | aru               | 15    | 101.993 | 8.76  |
| chr2L | 866900  | 868680  | aru               | 52    | 316.742 | 19.92 |
| chr2L | 870430  | 871981  | PNUTS             | 584   | 40.1825 | 5.65  |
| chr2L | 922586  | 923059  | CG4341            | 19    | 46.0093 | 7.65  |
| chr2L | 939774  | 940147  | CG4341            | 17132 | 7.58498 | 2.88  |
| chr2L | 1043050 | 1043684 | IA-2              | 284   | 23.1127 | 4.89  |
| chr2L | 1047034 | 1047394 | IA-2              | 840   | 28.594  | 5.61  |
| chr2L | 1047798 | 1048334 | IA-2              | 67    | 35.8015 | 5.93  |
| chr2L | 1048936 | 1049230 | IA-2              | 1056  | 8.8973  | 2.90  |
| chr2L | 1076986 | 1078009 | S                 | 45    | 39.143  | 5.55  |
| chr2L | 1076986 | 1078009 | ast               | 181   | 39.143  | 5.55  |
| chr2L | 1082680 | 1083038 | Atg4a             | 1960  | 80.6791 | 9.00  |
| chr2L | 1102203 | 1102854 | CG4629            | 28    | 166.71  | 13.62 |
| chr2L | 1108106 | 1108409 | mtRNApol          | 104   | 12.2259 | 2.87  |
| chr2L | 1118643 | 1119914 | Pino              | 31    | 316.742 | 42.69 |
| chr2L | 1125245 | 1126001 | Pino              | 3158  | 22.7276 | 4.54  |
| chr2L | 1128347 | 1129004 | Pino              | 400   | 31.2463 | 4.88  |
| chr2L | 1134306 | 1135036 | CG4577            | 212   | 30.0512 | 5.84  |
| chr2L | 1136799 | 1137305 | CG4577            | 2185  | 7.49255 | 2.81  |
| chr2L | 1156224 | 1156810 | capt              | 341   | 14.2744 | 3.86  |
| chr2L | 1157333 | 1158255 | capt              | 313   | 62.7435 | 6.87  |
| chr2L | 1185630 | 1186518 | CG5001            | 115   | 316.742 | 27.36 |
| chr2L | 1255740 | 1256448 | robo3             | 562   | 16.5777 | 4.14  |
| chr2L | 1346017 | 1346315 | CR45006           | 149   | 29.7702 | 6.16  |
| chr2L | 1361512 | 1362039 | NLaz              | 43    | 62.4554 | 6.53  |
| chr2L | 1361512 | 1362039 | NLaz              | 43    | 62.4554 | 6.53  |
| chr2L | 1420218 | 1420761 | robo2             | 11    | 48.7049 | 6.69  |
| chr2L | 1555014 | 1555300 | haf               | 29    | 20.1295 | 4.06  |
| chr2L | 1617557 | 1618258 | RFeSP             | 3756  | 142.735 | 12.83 |
| chr2L | 1644351 | 1644744 | CR45695           | 2581  | 44.1942 | 5.60  |
| chr2L | 1649777 | 1650299 | chinmo            | 1220  | 232.686 | 19.02 |
| chr2L | 1650757 | 1651500 | chinmo            | 49    | 159.173 | 13.37 |
| chr2L | 1662549 | 1663922 | chinmo            | 4566  | 118.863 | 14.14 |
| chr2L | 1669444 | 1670041 | chinmo            | 1990  | 66.7121 | 8.83  |
| chr2L | 1714362 | 1714874 | frtz              | 1214  | 26.345  | 4.92  |
| chr2L | 1723195 | 1724520 | Rim2              | 528   | 31.9969 | 4.55  |
| chr2L | 1727062 | 1728481 | Eno               | 366   | 210.606 | 15.23 |
| chr2L | 1729725 | 1730197 | CG31937           | 66    | 17.7837 | 3.56  |
| chr2L | 1732355 | 1732743 | CG17652           | 150   | 29.7318 | 4.85  |
| chr2L | 1732355 | 1732743 | CG17646           | 17    | 29.7318 | 4.85  |
| chr2L | 1736976 | 1737790 | CG17646           | 29    | 316.742 | 25.14 |
| chr2L | 1748609 | 1748917 | CG17712           | 3454  | 7.68684 | 2.77  |
| chr2L | 1774156 | 1774483 | Gr22e             | 9767  | 17.4777 | 4.42  |
| chr2L | 1808717 | 1809054 | Gr22a             | 13964 | 35.5108 | 6.39  |
| chr2L | 1836193 | 1836759 | wry               | 28    | 78.7891 | 10.14 |
| chr2L | 1884507 | 1885207 | CG7337            | 138   | 65.9089 | 7.93  |
| chr2L | 1902753 | 1903376 | CG7337            | 8786  | 49.182  | 6.85  |
| chr2L | 1909723 | 1910204 | CG7337            | 1770  | 139.86  | 12.71 |
| chr2L | 1911162 | 1911944 | CG7337            | 70    | 52.8402 | 5.80  |
| chr2L | 1914354 | 1914702 | CG7337            | 2745  | 14.9793 | 3.44  |
| chr2L | 1927341 | 1928011 | CG7337            | 107   | 316.742 | 20.00 |
| chr2L | 1930719 | 1931199 | CG7337            | 3134  | 16.0908 | 3.44  |
| chr2L | 1970396 | 1970995 | erm               | 272   | 113.607 | 11.80 |
| chr2L | 1972602 | 1973214 | Der-1             | 1042  | 163.308 | 14.71 |
| chr2L | 1980706 | 1981260 | CG15356           | 27    | 13.8643 | 3.40  |
| chr2L | 1980706 | 1981260 | CG15362           | 393   | 13.8643 | 3.40  |
| chr2L | 1987210 | 1988822 | Got2              | 527   | 299.789 | 16.60 |
| chr2L | 1987210 | 1988822 | Npc2a             | 4     | 299.789 | 16.60 |
| chr2L | 2009722 | 2010065 | CG4238            | 35    | 18.8793 | 3.51  |
| chr2L | 2037532 | 2038672 | Su(dx)            | 373   | 35.7647 | 5.04  |
| chr2L | 2130088 | 2131154 | GlyP              | 370   | 316.742 | 48.91 |
| chr2L | 2161011 | 2164130 | aop               | 1514  | 316.742 | 23.68 |
| chr2L | 2165649 | 2166340 | aop               | 4507  | 87.0012 | 9.66  |
| chr2L | 2168768 | 2169475 | aop               | 7505  | 39.352  | 4.95  |
| chr2L | 2173492 | 2173752 | aop               | 5078  | 9.63106 | 2.95  |

|       |         |         |         |       |         |       |
|-------|---------|---------|---------|-------|---------|-------|
| chr2L | 2175129 | 2176908 | aop     | 3102  | 316.742 | 19.10 |
| chr2L | 2177975 | 2179069 | aop     | 26    | 316.742 | 19.56 |
| chr2L | 2179869 | 2180255 | aop     | 1349  | 24.7197 | 4.94  |
| chr2L | 2193378 | 2193895 | CG34172 | 576   | 103.042 | 8.76  |
| chr2L | 2196290 | 2198237 | CG34172 | 760   | 243.137 | 12.91 |
| chr2L | 2198528 | 2199013 | CG34172 | 900   | 58.5422 | 6.80  |
| chr2L | 2199946 | 2203850 | CG34172 | 5519  | 316.742 | 35.41 |
| chr2L | 2221400 | 2222442 | papi    | 66    | 316.742 | 27.93 |
| chr2L | 2226620 | 2226916 | sau     | 226   | 11.8981 | 2.87  |
| chr2L | 2236622 | 2236972 | Sec24CD | 28    | 17.8969 | 3.95  |
| chr2L | 2242033 | 2242658 | CG4267  | 81    | 316.742 | 27.27 |
| chr2L | 2279358 | 2279721 | CR43753 | 144   | 15.5302 | 4.09  |
| chr2L | 2311415 | 2311823 | eyes    | 91    | 25.2621 | 5.13  |
| chr2L | 2362632 | 2365766 | Rab5    | 210   | 316.742 | 24.72 |
| chr2L | 2362632 | 2365766 | Axud1   | 2353  | 316.742 | 24.72 |
| chr2L | 2373486 | 2374159 | CG3609  | 126   | 133.887 | 13.12 |
| chr2L | 2374477 | 2374762 | CG3609  | 8     | 27.6826 | 4.85  |
| chr2L | 2374477 | 2374762 | CG15390 | 93    | 27.6826 | 4.85  |
| chr2L | 2375790 | 2376637 | Atxn7   | 46    | 142.555 | 11.99 |
| chr2L | 2423076 | 2423350 | CG44139 | 1545  | 11.5963 | 3.12  |
| chr2L | 2427678 | 2428747 | CR44912 | 254   | 43.4598 | 5.67  |
| chr2L | 2427678 | 2428747 | dpp     | 236   | 43.4598 | 5.67  |
| chr2L | 2433418 | 2434181 | dpp     | 5168  | 7.93292 | 2.58  |
| chr2L | 2434570 | 2434997 | dpp     | 6398  | 60.2213 | 7.50  |
| chr2L | 2450665 | 2451483 | dpp     | 180   | 316.742 | 27.54 |
| chr2L | 2454317 | 2455100 | dpp     | 66    | 57.2987 | 8.72  |
| chr2L | 2465563 | 2466059 | CR45286 | 7247  | 28.2939 | 5.16  |
| chr2L | 2492630 | 2493518 | Slh     | 329   | 52.7812 | 6.06  |
| chr2L | 2492630 | 2493518 | oaf     | 46    | 52.7812 | 6.06  |
| chr2L | 2530407 | 2530670 | CR44112 | 3123  | 9.17898 | 3.28  |
| chr2L | 2576600 | 2577008 | insv    | 86    | 44.3111 | 6.64  |
| chr2L | 2584540 | 2585088 | Drp1    | 599   | 15.6134 | 3.60  |
| chr2L | 2748498 | 2748830 | Pgk     | 186   | 21.3956 | 4.23  |
| chr2L | 2749292 | 2755902 | Pgk     | 2178  | 316.742 | 42.37 |
| chr2L | 2749292 | 2755902 | Bacc    | 368   | 316.742 | 42.37 |
| chr2L | 2749292 | 2755902 | Pgk     | 99    | 316.742 | 42.37 |
| chr2L | 2749292 | 2755902 | Bacc    | 65    | 316.742 | 42.37 |
| chr2L | 2797342 | 2797808 | CR43821 | 269   | 71.2184 | 9.83  |
| chr2L | 2798579 | 2799327 | Syt1    | 927   | 128.962 | 13.94 |
| chr2L | 2799676 | 2800273 | Syt1    | 98    | 80.8249 | 10.42 |
| chr2L | 2804793 | 2805259 | daw     | 253   | 41.1871 | 6.64  |
| chr2L | 2807983 | 2808550 | daw     | 20    | 27.779  | 5.35  |
| chr2L | 2829985 | 2831065 | Duox    | 454   | 78.4866 | 10.71 |
| chr2L | 2855172 | 2856297 | CG3104  | 320   | 56.9395 | 7.05  |
| chr2L | 2855172 | 2856297 | RpS21   | 12    | 56.9395 | 7.05  |
| chr2L | 2857999 | 2858445 | CG2991  | 1018  | 50.0262 | 6.68  |
| chr2L | 2861379 | 2862772 | CG2991  | 74    | 313.971 | 21.95 |
| chr2L | 2874175 | 2875236 | CG31694 | 406   | 151.896 | 13.36 |
| chr2L | 2874175 | 2875236 | CG8814  | 6     | 151.896 | 13.36 |
| chr2L | 2884788 | 2885378 | NTPase  | 51    | 54.1035 | 5.81  |
| chr2L | 2885755 | 2887313 | NTPase  | 929   | 316.742 | 30.54 |
| chr2L | 2885755 | 2887313 | lilli   | 851   | 316.742 | 30.54 |
| chr2L | 2887999 | 2889594 | lilli   | 680   | 316.742 | 26.89 |
| chr2L | 2897185 | 2897516 | lilli   | 7272  | 8.4325  | 2.92  |
| chr2L | 2900144 | 2900770 | lilli   | 10137 | 32.1549 | 5.02  |
| chr2L | 2908761 | 2909120 | lilli   | 18761 | 28.5896 | 4.72  |
| chr2L | 2924217 | 2925754 | lilli   | 21855 | 277.124 | 19.82 |
| chr2L | 2945336 | 2945929 | lilli   | 1099  | 15.796  | 3.96  |
| chr2L | 2955647 | 2958306 | Rbp9    | 871   | 272.574 | 22.98 |
| chr2L | 2958868 | 2959158 | Rbp9    | 113   | 24.7797 | 5.03  |
| chr2L | 2976851 | 2977355 | CG9641  | 57    | 10.6341 | 3.18  |
| chr2L | 2976851 | 2977355 | CG3165  | 202   | 10.6341 | 3.18  |
| chr2L | 2993183 | 2993515 | CG3558  | 398   | 14.8975 | 3.35  |
| chr2L | 3056256 | 3056954 | FASN1   | 46    | 316.742 | 17.10 |
| chr2L | 3058355 | 3059610 | FASN1   | 2422  | 49.3544 | 6.17  |
| chr2L | 3088247 | 3088535 | toc     | 1905  | 15.3953 | 3.76  |
| chr2L | 3094929 | 3095747 | toc     | 611   | 87.2633 | 8.97  |
| chr2L | 3107874 | 3108614 | toc     | 80    | 242.002 | 17.00 |
| chr2L | 3111338 | 3111750 | toc     | 798   | 65.9727 | 8.49  |
| chr2L | 3122075 | 3122584 | CG15403 | 6249  | 62.4232 | 7.53  |
| chr2L | 3124470 | 3125166 | CG15403 | 3838  | 316.742 | 29.12 |
| chr2L | 3144630 | 3145027 | toc     | 50    | 71.6306 | 7.71  |
| chr2L | 3159191 | 3159628 | Mad     | 258   | 26.9525 | 4.51  |
| chr2L | 3165290 | 3165698 | Hydr2   | 1870  | 52.5118 | 7.27  |
| chr2L | 3172786 | 3173124 | CG31698 | 884   | 13.2341 | 3.03  |

|       |         |         |          |       |         |       |
|-------|---------|---------|----------|-------|---------|-------|
| chr2L | 3301643 | 3303545 | CG9663   | 76    | 293.897 | 19.46 |
| chr2L | 3348270 | 3348764 | E23      | 6347  | 34.811  | 6.06  |
| chr2L | 3354564 | 3355517 | E23      | 86    | 316.742 | 46.77 |
| chr2L | 3371128 | 3371608 | CG34394  | 7     | 37.6469 | 5.21  |
| chr2L | 3425916 | 3426402 | pgant2   | 591   | 179.547 | 16.53 |
| chr2L | 3426733 | 3427122 | pgant2   | 237   | 55.4961 | 6.97  |
| chr2L | 3476434 | 3476786 | CR43928  | 246   | 26.5367 | 4.71  |
| chr2L | 3477742 | 3478726 | Thor     | 53    | 316.742 | 29.90 |
| chr2L | 3479730 | 3480112 | Thor     | 1487  | 14.1573 | 3.37  |
| chr2L | 3482350 | 3482674 | Thor     | 3997  | 14.2304 | 3.67  |
| chr2L | 3507051 | 3508233 | tim      | 92    | 102.265 | 9.89  |
| chr2L | 3533788 | 3534793 | Che-13   | 3585  | 316.742 | 35.32 |
| chr2L | 3538426 | 3540305 | drm      | 155   | 316.742 | 25.83 |
| chr2L | 3545061 | 3545830 | drm      | 5715  | 316.742 | 39.94 |
| chr2L | 3573275 | 3574014 | CR43822  | 1479  | 19.1864 | 4.68  |
| chr2L | 3580532 | 3581374 | sob      | 117   | 316.742 | 60.90 |
| chr2L | 3606202 | 3607078 | odd      | 112   | 235.217 | 22.66 |
| chr2L | 3618951 | 3619404 | Dot      | 62    | 45.5576 | 6.62  |
| chr2L | 3628879 | 3629257 | for      | 3172  | 14.3347 | 3.49  |
| chr2L | 3631474 | 3633259 | for      | 22    | 316.742 | 20.63 |
| chr2L | 3639994 | 3640351 | mir-4972 | 3084  | 13.1443 | 3.71  |
| chr2L | 3645957 | 3646236 | for      | 28    | 12.7984 | 3.24  |
| chr2L | 3648487 | 3648822 | for      | 2501  | 32.6669 | 5.42  |
| chr2L | 3655164 | 3657095 | for      | 1002  | 316.742 | 23.41 |
| chr2L | 3657384 | 3658462 | for      | 1102  | 39.7209 | 6.62  |
| chr2L | 3662015 | 3662816 | CG34340  | 284   | 244.486 | 14.60 |
| chr2L | 3699001 | 3699322 | CG10031  | 76    | 26.5212 | 5.17  |
| chr2L | 3703279 | 3703772 | CG2816   | 87    | 25.1003 | 4.69  |
| chr2L | 3712717 | 3713850 | CG31955  | 484   | 12.173  | 2.83  |
| chr2L | 3712717 | 3713850 | CG2818   | 230   | 12.173  | 2.83  |
| chr2L | 3717975 | 3718567 | Shaw     | 54    | 40.3311 | 6.75  |
| chr2L | 3729576 | 3730674 | CG10019  | 212   | 196.677 | 16.96 |
| chr2L | 3756849 | 3757458 | CG43707  | 43    | 90.6763 | 11.92 |
| chr2L | 3771005 | 3773267 | bowl     | 60    | 316.742 | 28.45 |
| chr2L | 3776845 | 3777121 | bowl     | 1938  | 18.1679 | 4.06  |
| chr2L | 3778476 | 3779004 | bowl     | 104   | 25.6344 | 4.85  |
| chr2L | 3786265 | 3787543 | bark     | 55    | 316.742 | 33.93 |
| chr2L | 3789698 | 3789977 | bark     | 171   | 11.7704 | 3.39  |
| chr2L | 3803069 | 3806746 | Reph     | 370   | 316.742 | 22.84 |
| chr2L | 3825309 | 3825900 | slp1     | 86    | 111.408 | 13.35 |
| chr2L | 3835203 | 3835724 | slp2     | 1447  | 65.2134 | 8.26  |
| chr2L | 3836369 | 3836963 | slp2     | 162   | 162.532 | 14.83 |
| chr2L | 3888033 | 3889712 | capu     | 70    | 312.407 | 21.31 |
| chr2L | 3895595 | 3896379 | capu     | 85    | 92.2678 | 10.68 |
| chr2L | 3991575 | 3992051 | fred     | 156   | 27.3298 | 5.59  |
| chr2L | 3992396 | 3992747 | fred     | 882   | 41.9596 | 6.99  |
| chr2L | 4030191 | 4030767 | ed       | 963   | 39.1347 | 5.32  |
| chr2L | 4031111 | 4032049 | ed       | 7     | 108.653 | 10.77 |
| chr2L | 4197152 | 4198191 | CG3714   | 68    | 316.742 | 32.99 |
| chr2L | 4220331 | 4220654 | ft       | 1343  | 21.8111 | 4.06  |
| chr2L | 4221565 | 4222175 | ft       | 79    | 155.659 | 13.72 |
| chr2L | 4222448 | 4222702 | ft       | 773   | 17.7908 | 4.22  |
| chr2L | 4281817 | 4282239 | Art2     | 673   | 86.7371 | 10.97 |
| chr2L | 4282768 | 4283894 | tutl     | 88    | 246.873 | 19.35 |
| chr2L | 4301459 | 4301748 | tutl     | 17366 | 14.4039 | 3.96  |
| chr2L | 4310136 | 4310525 | bdl      | 14184 | 14.0411 | 4.07  |
| chr2L | 4324216 | 4324645 | bdl      | 33    | 12.198  | 3.54  |
| chr2L | 4331850 | 4334906 | Atet     | 50    | 264.434 | 14.94 |
| chr2L | 4340009 | 4340807 | Atet     | 1738  | 147.44  | 10.69 |
| chr2L | 4371608 | 4372253 | Traf4    | 86    | 316.742 | 33.02 |
| chr2L | 4375037 | 4375504 | Traf4    | 3303  | 119.659 | 10.11 |
| chr2L | 4419181 | 4419689 | CG43055  | 8327  | 12.9246 | 3.40  |
| chr2L | 4440692 | 4441509 | CG15431  | 39    | 105.348 | 11.18 |
| chr2L | 4456622 | 4456881 | Gs1l     | 12    | 11.7751 | 3.24  |
| chr2L | 4476778 | 4477294 | ine      | 129   | 243.695 | 23.05 |
| chr2L | 4591749 | 4592456 | dpy      | 170   | 260.244 | 19.94 |
| chr2L | 4594695 | 4595498 | dpy      | 135   | 316.742 | 34.76 |
| chr2L | 4614083 | 4614852 | dpy      | 170   | 316.742 | 22.31 |
| chr2L | 4696177 | 4696544 | CG34351  | 1734  | 11.6988 | 3.59  |
| chr2L | 4793804 | 4794204 | CG15630  | 100   | 15.8376 | 3.29  |
| chr2L | 4810071 | 4811042 | CR45297  | 1720  | 91.2744 | 10.73 |
| chr2L | 4811385 | 4812040 | CR45297  | 235   | 31.2678 | 4.33  |
| chr2L | 4820373 | 4822000 | CG15628  | 939   | 66.7764 | 9.52  |
| chr2L | 4846633 | 4847229 | mxt      | 76    | 43.5404 | 5.99  |
| chr2L | 4852620 | 4853097 | pog      | 38    | 32.5612 | 5.47  |



|       |         |         |                   |       |         |       |
|-------|---------|---------|-------------------|-------|---------|-------|
| chr2L | 4891735 | 4892373 | CG3036            | 40    | 71.9273 | 7.61  |
| chr2L | 4928242 | 4928592 | hoe1              | 30    | 17.7804 | 4.21  |
| chr2L | 4936146 | 4936774 | hoe2              | 58    | 27.0358 | 5.43  |
| chr2L | 4981482 | 4981918 | CG8892            | 99    | 17.6046 | 3.74  |
| chr2L | 4981482 | 4981918 | CG34126           | 78    | 17.6046 | 3.74  |
| chr2L | 4982187 | 4982520 | CG34126           | 807   | 9.40479 | 2.86  |
| chr2L | 4997212 | 4998216 | Rtnl1             | 406   | 316.742 | 21.86 |
| chr2L | 4998975 | 4999517 | Rtnl1             | 423   | 18.347  | 3.88  |
| chr2L | 5000074 | 5001629 | Rtnl1             | 33    | 37.2168 | 5.31  |
| chr2L | 5002984 | 5003422 | Rtnl1             | 1748  | 17.1546 | 3.75  |
| chr2L | 5004633 | 5005721 | Rtnl1             | 63    | 127.32  | 11.15 |
| chr2L | 5009536 | 5009924 | Rtnl1             | 80    | 9.64745 | 2.65  |
| chr2L | 5037375 | 5038024 | SP555             | 158   | 95.3883 | 10.79 |
| chr2L | 5037375 | 5038024 | CG14042           | 158   | 95.3883 | 10.79 |
| chr2L | 5037375 | 5038024 | SP555             | 247   | 95.3883 | 10.79 |
| chr2L | 5037375 | 5038024 | CG14042           | 247   | 95.3883 | 10.79 |
| chr2L | 5043403 | 5043969 | CG31650           | 144   | 10.7923 | 2.69  |
| chr2L | 5044328 | 5044638 | CG44000           | 61    | 13.3343 | 3.53  |
| chr2L | 5044328 | 5044638 | CG33995           | 61    | 13.3343 | 3.53  |
| chr2L | 5044328 | 5044638 | CG44001           | 61    | 13.3343 | 3.53  |
| chr2L | 5052567 | 5052904 | eIF-3p40          | 43    | 26.345  | 4.92  |
| chr2L | 5052567 | 5052904 | CG14040           | 105   | 26.345  | 4.92  |
| chr2L | 5062706 | 5063129 | qtc               | 36    | 49.907  | 7.33  |
| chr2L | 5063886 | 5064437 | qtc               | 173   | 39.5918 | 6.25  |
| chr2L | 5070882 | 5071194 | RpL37A            | 50    | 17.1398 | 3.96  |
| chr2L | 5070882 | 5071194 | CR45305           | 60    | 17.1398 | 3.96  |
| chr2L | 5079213 | 5079686 | CR45305           | 8357  | 125.903 | 12.26 |
| chr2L | 5092789 | 5094066 | pgant5            | 117   | 171.06  | 12.49 |
| chr2L | 5092789 | 5094066 | CG5828            | 500   | 171.06  | 12.49 |
| chr2L | 5096561 | 5097168 | CG4230            | 612   | 56.4115 | 6.97  |
| chr2L | 5107374 | 5109478 | Msp300            | 158   | 316.742 | 28.40 |
| chr2L | 5144985 | 5146658 | Msp300            | 389   | 316.742 | 22.46 |
| chr2L | 5147451 | 5147952 | Msp300            | 1342  | 121.737 | 9.77  |
| chr2L | 5152392 | 5152751 | Msp300            | 829   | 32.3351 | 5.50  |
| chr2L | 5237120 | 5237970 | tkv               | 93    | 316.742 | 46.29 |
| chr2L | 5278216 | 5278669 | Bsg25D            | 24    | 20.0558 | 4.74  |
| chr2L | 5292964 | 5293412 | vri               | 4221  | 67.446  | 7.32  |
| chr2L | 5296809 | 5297398 | CR45730           | 828   | 256.108 | 20.58 |
| chr2L | 5300956 | 5301906 | vri               | 1742  | 123.55  | 12.81 |
| chr2L | 5302664 | 5304025 | vri               | 2177  | 39.9971 | 5.08  |
| chr2L | 5305089 | 5306007 | vri               | 63    | 57.4454 | 6.58  |
| chr2L | 5306303 | 5307121 | vri               | 984   | 316.742 | 25.09 |
| chr2L | 5314629 | 5315183 | CG14024           | 44    | 121.926 | 13.43 |
| chr2L | 5324906 | 5326889 | CR44985           | 993   | 79.4015 | 8.23  |
| chr2L | 5324906 | 5326889 | Ncoa6             | 1173  | 79.4015 | 8.23  |
| chr2L | 5342085 | 5342638 | CG12512           | 55    | 22.1428 | 3.85  |
| chr2L | 5403438 | 5404100 | H15               | 550   | 226.442 | 14.52 |
| chr2L | 5421477 | 5422074 | CR43713           | 10121 | 67.4938 | 8.97  |
| chr2L | 5438216 | 5438481 | snRNA:Me28S-A248f | 648   | 13.7746 | 3.68  |
| chr2L | 5460972 | 5461793 | mid               | 239   | 316.742 | 24.76 |
| chr2L | 5492112 | 5492375 | CR45287           | 5356  | 10.6016 | 3.08  |
| chr2L | 5542642 | 5543575 | Lam               | 41    | 316.742 | 18.70 |
| chr2L | 5546669 | 5547526 | Oscillin          | 28    | 235.331 | 13.93 |
| chr2L | 5617898 | 5618312 | DIP-eta           | 87    | 17.8289 | 4.23  |
| chr2L | 5687357 | 5688029 | CR44819           | 2838  | 22.432  | 4.68  |
| chr2L | 5724548 | 5725269 | CG11030           | 410   | 29.2682 | 4.48  |
| chr2L | 5730926 | 5731256 | CG14006           | 2343  | 10.1277 | 3.30  |
| chr2L | 5740647 | 5741234 | CG11147           | 14    | 122.315 | 11.28 |
| chr2L | 5742579 | 5743019 | CG11147           | 1569  | 24.7797 | 5.03  |
| chr2L | 5799192 | 5800466 | CG9171            | 39    | 316.742 | 24.14 |
| chr2L | 5804864 | 5805768 | CG11034           | 54    | 316.742 | 33.49 |
| chr2L | 5879231 | 5880145 | rau               | 62    | 316.742 | 23.12 |
| chr2L | 5906959 | 5907977 | bchs              | 227   | 316.742 | 21.64 |
| chr2L | 5923620 | 5924025 | CG9016            | 136   | 16.7612 | 3.73  |
| chr2L | 5925025 | 5925601 | dsf               | 514   | 23.3434 | 5.36  |
| chr2L | 5943505 | 5945016 | Gpdh              | 701   | 316.742 | 42.41 |
| chr2L | 5945642 | 5945945 | Gpdh              | 1810  | 14.8583 | 2.94  |
| chr2L | 5973794 | 5974457 | CR43465           | 3094  | 54.1486 | 6.76  |
| chr2L | 5977230 | 5978127 | chic              | 2484  | 316.742 | 17.55 |
| chr2L | 5978799 | 5981116 | chic              | 143   | 316.742 | 41.42 |
| chr2L | 5981445 | 5983687 | eIF-4a            | 279   | 316.742 | 30.47 |
| chr2L | 5997001 | 5997496 | lid               | 615   | 10.6257 | 3.17  |
| chr2L | 5997791 | 5998372 | lid               | 270   | 37.4162 | 5.93  |
| chr2L | 6006465 | 6006879 | Gal               | 166   | 30.3392 | 5.57  |
| chr2L | 6019790 | 6020130 | H2.0              | 615   | 19.5844 | 4.87  |

|       |         |         |              |       |         |       |
|-------|---------|---------|--------------|-------|---------|-------|
| chr2L | 6045754 | 6046242 | ade2         | 2     | 20.7853 | 3.89  |
| chr2L | 6047838 | 6048388 | slmo         | 18    | 10.0967 | 2.70  |
| chr2L | 6047838 | 6048388 | CG12393      | 49    | 10.0967 | 2.70  |
| chr2L | 6051135 | 6051668 | CG9135       | 473   | 39.734  | 5.10  |
| chr2L | 6054016 | 6054498 | CG13995      | 78    | 50.3978 | 7.15  |
| chr2L | 6062564 | 6062864 | ND-51        | 49    | 10.9339 | 3.03  |
| chr2L | 6070998 | 6071311 | Kr-h2        | 35    | 7.46815 | 2.46  |
| chr2L | 6078289 | 6080731 | CR9162       | 797   | 316.742 | 36.37 |
| chr2L | 6078289 | 6080731 | CR44773      | 514   | 316.742 | 36.37 |
| chr2L | 6081116 | 6081751 | Kr-h1        | 1213  | 39.4449 | 5.79  |
| chr2L | 6082179 | 6083711 | Kr-h1        | 831   | 239.658 | 15.85 |
| chr2L | 6088081 | 6089365 | CG45075      | 2886  | 316.742 | 28.65 |
| chr2L | 6088081 | 6089365 | Kr-h1        | 2886  | 316.742 | 28.65 |
| chr2L | 6098839 | 6099281 | CG9175       | 34    | 20.9703 | 4.06  |
| chr2L | 6100143 | 6100539 | stai         | 67    | 40.6851 | 6.54  |
| chr2L | 6109051 | 6109857 | stai         | 145   | 78.4866 | 10.71 |
| chr2L | 6178545 | 6179444 | CG34380      | 37    | 174.735 | 16.83 |
| chr2L | 6186401 | 6186830 | CG34380      | 7481  | 28.6864 | 5.90  |
| chr2L | 6252273 | 6253225 | Ddr          | 629   | 140.945 | 14.23 |
| chr2L | 6323632 | 6324836 | PDZ-GEF      | 770   | 316.742 | 22.39 |
| chr2L | 6338697 | 6339811 | Cpr          | 572   | 316.742 | 27.68 |
| chr2L | 6341521 | 6342017 | Cpr          | 50    | 45.3359 | 5.88  |
| chr2L | 6423243 | 6423828 | Tig          | 314   | 44.1311 | 6.08  |
| chr2L | 6424224 | 6424694 | Fic          | 42    | 21.8908 | 4.33  |
| chr2L | 6447532 | 6448076 | CG9527       | 18    | 63.9562 | 7.78  |
| chr2L | 6455014 | 6456567 | retm         | 676   | 155.05  | 12.11 |
| chr2L | 6455014 | 6456567 | frj          | 798   | 155.05  | 12.11 |
| chr2L | 6465458 | 6465880 | CG16947      | 3     | 68.7154 | 8.05  |
| chr2L | 6471889 | 6472214 | mmy          | 68    | 25.8828 | 4.83  |
| chr2L | 6473396 | 6473928 | mmy          | 118   | 7.21123 | 2.38  |
| chr2L | 6479241 | 6481868 | Sec61alpha   | 979   | 189.731 | 12.55 |
| chr2L | 6479241 | 6481868 | Daxx         | 1441  | 189.731 | 12.55 |
| chr2L | 6479241 | 6481868 | CR45463      | 1443  | 189.731 | 12.55 |
| chr2L | 6490780 | 6491303 | CG9548       | 316   | 12.5313 | 3.19  |
| chr2L | 6490780 | 6491303 | CG31638      | 99    | 12.5313 | 3.19  |
| chr2L | 6494272 | 6494849 | CG9547       | 44    | 316.742 | 21.63 |
| chr2L | 6498464 | 6498887 | CG31637      | 25    | 32.3271 | 5.23  |
| chr2L | 6525257 | 6525514 | eya          | 5135  | 11.9218 | 3.27  |
| chr2L | 6535793 | 6536541 | eya          | 215   | 159.813 | 13.15 |
| chr2L | 6546908 | 6547230 | eya          | 55    | 28.2939 | 5.16  |
| chr2L | 6600869 | 6601722 | CG11319      | 111   | 224.893 | 21.87 |
| chr2L | 6610993 | 6611650 | CG11050      | 97    | 9.32917 | 2.65  |
| chr2L | 6612345 | 6613165 | CG11050      | 903   | 112.001 | 10.99 |
| chr2L | 6644457 | 6644807 | CG31635      | 3508  | 30.1806 | 4.93  |
| chr2L | 6647100 | 6649439 | CG31635      | 657   | 258.137 | 15.97 |
| chr2L | 6647100 | 6649439 | Tango1       | 1899  | 258.137 | 15.97 |
| chr2L | 6667630 | 6668246 | Galt         | 98    | 199.406 | 13.26 |
| chr2L | 6672929 | 6673971 | Spn27A       | 10    | 316.742 | 24.52 |
| chr2L | 6672929 | 6673971 | CG34310      | 626   | 316.742 | 24.52 |
| chr2L | 6684081 | 6684647 | Nhe3         | 45    | 16.3189 | 3.65  |
| chr2L | 6709036 | 6709342 | Tsp          | 67    | 15.6368 | 3.71  |
| chr2L | 6722930 | 6723326 | homer        | 81    | 12.288  | 2.90  |
| chr2L | 6723990 | 6724552 | Liprin-alpha | 447   | 32.272  | 4.55  |
| chr2L | 6742034 | 6742591 | CG11221      | 380   | 18.301  | 4.40  |
| chr2L | 6773814 | 6774254 | CG17378      | 95    | 13.0059 | 3.74  |
| chr2L | 6775059 | 6775336 | CG17378      | 537   | 9.17898 | 3.28  |
| chr2L | 6784020 | 6784613 | nrv1         | 2710  | 23.1959 | 4.51  |
| chr2L | 6785233 | 6785531 | nrv1         | 1494  | 19.2268 | 3.68  |
| chr2L | 6786498 | 6788210 | nrv1         | 929   | 316.742 | 30.94 |
| chr2L | 6791749 | 6792540 | nrv2         | 2437  | 316.742 | 21.27 |
| chr2L | 6793650 | 6795265 | nrv2         | 345   | 261.655 | 18.10 |
| chr2L | 6797504 | 6797766 | nrv2         | 573   | 18.3301 | 3.54  |
| chr2L | 6817361 | 6817785 | sens-2       | 4339  | 59.5991 | 7.82  |
| chr2L | 6821679 | 6822035 | sens-2       | 74    | 16.6579 | 4.45  |
| chr2L | 6833469 | 6834156 | sens-2       | 11457 | 88.982  | 12.00 |
| chr2L | 6873849 | 6875342 | Nlg2         | 676   | 56.5397 | 8.56  |
| chr2L | 6918690 | 6919661 | nop5         | 700   | 13.5923 | 3.31  |
| chr2L | 6920775 | 6922452 | Hrb27C       | 475   | 51.7489 | 6.03  |
| chr2L | 6948523 | 6948995 | ihog         | 21    | 29.6506 | 4.96  |
| chr2L | 6967408 | 6967722 | smt3         | 85    | 18.347  | 4.21  |
| chr2L | 6971555 | 6972049 | snRNP-U1-70K | 198   | 28.1655 | 4.50  |
| chr2L | 6990179 | 6990541 | CR44326      | 4413  | 34.7274 | 4.99  |
| chr2L | 7000562 | 7000891 | uif          | 9190  | 26.1113 | 4.64  |
| chr2L | 7009774 | 7010480 | uif          | 163   | 73.5273 | 9.14  |
| chr2L | 7033100 | 7033511 | Caper        | 621   | 22.0647 | 4.25  |

|       |         |         |             |       |         |       |
|-------|---------|---------|-------------|-------|---------|-------|
| chr2L | 7037810 | 7038686 | milt        | 642   | 15.6523 | 3.66  |
| chr2L | 7042284 | 7042577 | milt        | 85    | 10.4108 | 2.63  |
| chr2L | 7048912 | 7050933 | milt        | 62    | 296.33  | 16.23 |
| chr2L | 7056274 | 7056897 | Mnn1        | 467   | 14.7124 | 3.67  |
| chr2L | 7084436 | 7084908 | Pvf2        | 44    | 316.742 | 30.93 |
| chr2L | 7121995 | 7122324 | Pvf3        | 11360 | 23.0575 | 4.88  |
| chr2L | 7187941 | 7189085 | CG4496      | 703   | 316.742 | 19.99 |
| chr2L | 7199706 | 7200249 | CG4502      | 4338  | 92.2678 | 10.68 |
| chr2L | 7203516 | 7204351 | CG4502      | 450   | 35.1091 | 5.27  |
| chr2L | 7219385 | 7220178 | CG13784     | 506   | 26.1527 | 4.53  |
| chr2L | 7245311 | 7245767 | Ndae1       | 92    | 124.278 | 11.18 |
| chr2L | 7249252 | 7249853 | Ndae1       | 196   | 182.206 | 16.30 |
| chr2L | 7306756 | 7307297 | wg          | 203   | 71.7856 | 9.04  |
| chr2L | 7388052 | 7388383 | CG5149      | 3     | 16.9601 | 3.59  |
| chr2L | 7402916 | 7403311 | CG5171      | 30    | 48.6953 | 7.38  |
| chr2L | 7418118 | 7418943 | CR43857     | 5167  | 316.742 | 30.29 |
| chr2L | 7419670 | 7421099 | CR43857     | 3764  | 35.9951 | 6.40  |
| chr2L | 7422368 | 7422901 | CR43857     | 1116  | 110.447 | 11.95 |
| chr2L | 7423406 | 7425672 | CR43857     | 1244  | 279.499 | 17.58 |
| chr2L | 7436885 | 7437955 | CG5973      | 80    | 316.742 | 20.28 |
| chr2L | 7451019 | 7451338 | santa-maria | 63    | 33.4109 | 5.71  |
| chr2L | 7494555 | 7494876 | Ziz         | 1603  | 51.4229 | 7.62  |
| chr2L | 7495249 | 7496519 | Ziz         | 730   | 316.742 | 29.27 |
| chr2L | 7529998 | 7531239 | RapGAP1     | 392   | 316.742 | 30.71 |
| chr2L | 7534919 | 7535315 | RapGAP1     | 4531  | 56.8377 | 6.68  |
| chr2L | 7576399 | 7577373 | RapGAP1     | 409   | 79.5215 | 7.95  |
| chr2L | 7597991 | 7598867 | CR45370     | 5620  | 65.111  | 8.33  |
| chr2L | 7608036 | 7608427 | CG6739      | 184   | 41.3576 | 6.86  |
| chr2L | 7627278 | 7627574 | CR44799     | 8713  | 17.3282 | 4.06  |
| chr2L | 7674683 | 7675447 | Slob        | 129   | 61.9574 | 8.34  |
| chr2L | 7701330 | 7701962 | Tep2        | 82    | 316.742 | 22.41 |
| chr2L | 7702597 | 7703191 | Tep3        | 75    | 66.0871 | 6.88  |
| chr2L | 7711019 | 7711610 | Nil         | 97    | 17.4612 | 4.21  |
| chr2L | 7790355 | 7790683 | CG7149      | 18    | 8.503   | 2.81  |
| chr2L | 7799418 | 7800217 | Herp        | 1     | 40.8927 | 5.41  |
| chr2L | 7799418 | 7800217 | r2d2        | 298   | 40.8927 | 5.41  |
| chr2L | 7808980 | 7810830 | cdc14       | 919   | 316.742 | 27.64 |
| chr2L | 7811298 | 7811676 | LanB1       | 13    | 47.0061 | 6.56  |
| chr2L | 7827780 | 7829417 | mts         | 512   | 316.742 | 29.82 |
| chr2L | 7832762 | 7833176 | mts         | 5157  | 38.1633 | 5.64  |
| chr2L | 7851397 | 7851718 | CG14535     | 3698  | 19.7607 | 4.83  |
| chr2L | 7854912 | 7855571 | CG14535     | 92    | 76.8981 | 9.04  |
| chr2L | 7878990 | 7879918 | spz3        | 108   | 316.742 | 30.35 |
| chr2L | 7880317 | 7880997 | spz3        | 1166  | 316.742 | 26.68 |
| chr2L | 7936119 | 7936767 | Snoo        | 40556 | 21.4555 | 4.42  |
| chr2L | 7956698 | 7957083 | Snoo        | 20129 | 11.0815 | 3.38  |
| chr2L | 7961168 | 7961553 | Snoo        | 15710 | 93.1491 | 9.42  |
| chr2L | 7965792 | 7966143 | Snoo        | 11034 | 21.9618 | 4.79  |
| chr2L | 7966483 | 7967237 | Snoo        | 10235 | 47.7951 | 7.30  |
| chr2L | 7967564 | 7968088 | Snoo        | 9290  | 45.136  | 6.24  |
| chr2L | 7968644 | 7968954 | Snoo        | 8221  | 16.6402 | 4.15  |
| chr2L | 7973352 | 7973936 | Snoo        | 3343  | 82.8517 | 9.56  |
| chr2L | 7976661 | 7977133 | Snoo        | 171   | 197.511 | 15.58 |
| chr2L | 7984037 | 7984524 | Snoo        | 83    | 316.742 | 24.56 |
| chr2L | 7984966 | 7985490 | CG7231      | 50    | 230.412 | 17.47 |
| chr2L | 7991427 | 7991969 | pes         | 143   | 91.1054 | 10.36 |
| chr2L | 7993127 | 7994718 | pes         | 14    | 130.926 | 12.52 |
| chr2L | 7998768 | 7999173 | Sirup       | 26    | 44.9382 | 5.35  |
| chr2L | 8000467 | 8000965 | Sirup       | 1711  | 16.5566 | 3.69  |
| chr2L | 8006091 | 8007865 | Spn28Dc     | 133   | 316.742 | 32.67 |
| chr2L | 8009203 | 8009890 | CG12560     | 34    | 120.784 | 9.58  |
| chr2L | 8010476 | 8010741 | CG34010     | 55    | 17.7496 | 3.92  |
| chr2L | 8012401 | 8013058 | Tg          | 74    | 303.065 | 18.10 |
| chr2L | 8030744 | 8032242 | Cka         | 807   | 316.742 | 29.02 |
| chr2L | 8035152 | 8035518 | Cka         | 4369  | 12.9987 | 3.32  |
| chr2L | 8083308 | 8085012 | Bsg         | 342   | 316.742 | 20.86 |
| chr2L | 8085480 | 8086009 | Bsg         | 2267  | 58.5422 | 6.80  |
| chr2L | 8088164 | 8088741 | Bsg         | 252   | 50.4674 | 7.25  |
| chr2L | 8097159 | 8098105 | Bsg         | 8471  | 29.697  | 5.68  |
| chr2L | 8100020 | 8100431 | Bsg         | 11145 | 34.9379 | 5.92  |
| chr2L | 8103932 | 8105019 | Bsg         | 15110 | 316.742 | 24.15 |
| chr2L | 8148492 | 8149135 | CG43394     | 93    | 120.798 | 12.95 |
| chr2L | 8149730 | 8150231 | CG43394     | 968   | 21.7866 | 4.25  |
| chr2L | 8162510 | 8163901 | Piezo       | 16    | 316.742 | 24.55 |
| chr2L | 8171663 | 8172010 | Piezo       | 8753  | 18.0696 | 4.10  |

|       |         |         |           |       |         |       |
|-------|---------|---------|-----------|-------|---------|-------|
| chr2L | 8204741 | 8205713 | SLC5A11   | 314   | 316.742 | 20.58 |
| chr2L | 8204741 | 8205713 | CR44120   | 202   | 316.742 | 20.58 |
| chr2L | 8212905 | 8213191 | CG8360    | 45    | 9.31732 | 2.92  |
| chr2L | 8233659 | 8233996 | Pvr       | 3164  | 11.436  | 3.26  |
| chr2L | 8239495 | 8239968 | Pvr       | 42    | 26.4389 | 4.33  |
| chr2L | 8257284 | 8258181 | CG8086    | 13    | 31.4312 | 4.96  |
| chr2L | 8265479 | 8266240 | Btk29A    | 293   | 40.9377 | 6.34  |
| chr2L | 8277022 | 8278497 | Btk29A    | 323   | 316.742 | 31.52 |
| chr2L | 8300514 | 8301097 | Btk29A    | 52    | 79.5215 | 7.95  |
| chr2L | 8324449 | 8325679 | CG7781    | 672   | 36.6054 | 5.39  |
| chr2L | 8328685 | 8329219 | CG14275   | 66    | 316.742 | 19.90 |
| chr2L | 8346067 | 8346787 | CG7778    | 122   | 316.742 | 24.20 |
| chr2L | 8364388 | 8364863 | RpS13     | 8     | 17.7837 | 3.56  |
| chr2L | 8364388 | 8364863 | CSN8      | 237   | 17.7837 | 3.56  |
| chr2L | 8365933 | 8366605 | Pp2A-29B  | 0     | 13.4933 | 3.42  |
| chr2L | 8370336 | 8370903 | CG17292   | 24    | 59.8898 | 7.00  |
| chr2L | 8370336 | 8370903 | CR45341   | 117   | 59.8898 | 7.00  |
| chr2L | 8384371 | 8384721 | CG13384   | 57    | 14.7878 | 3.45  |
| chr2L | 8403536 | 8404055 | emb       | 206   | 9.20515 | 2.60  |
| chr2L | 8403536 | 8404055 | CR44991   | 146   | 9.20515 | 2.60  |
| chr2L | 8411472 | 8411864 | CG13397   | 64    | 79.7819 | 9.54  |
| chr2L | 8415634 | 8417103 | Akap200   | 784   | 94.1541 | 8.47  |
| chr2L | 8419649 | 8420653 | Akap200   | 505   | 298.054 | 18.53 |
| chr2L | 8424686 | 8425194 | Akap200   | 1766  | 60.9294 | 8.15  |
| chr2L | 8463796 | 8464147 | fu12      | 4     | 38.2014 | 4.85  |
| chr2L | 8478070 | 8479012 | d         | 35    | 223.555 | 18.51 |
| chr2L | 8521934 | 8522288 | Acer      | 179   | 39.4752 | 6.39  |
| chr2L | 8528992 | 8529317 | CG17834   | 50    | 11.2178 | 3.01  |
| chr2L | 8534287 | 8536576 | CG17834   | 636   | 316.742 | 34.51 |
| chr2L | 8542063 | 8544413 | Sema-1a   | 830   | 190.08  | 13.26 |
| chr2L | 8619435 | 8619836 | CR43855   | 25098 | 26.5164 | 5.32  |
| chr2L | 8690962 | 8692063 | Hnf4      | 511   | 316.742 | 28.52 |
| chr2L | 8692458 | 8692923 | Hnf4      | 305   | 60.2566 | 7.19  |
| chr2L | 8699589 | 8700155 | Hnf4      | 74    | 13.7402 | 3.08  |
| chr2L | 8707582 | 8707971 | Hnf4      | 1279  | 50.9627 | 7.35  |
| chr2L | 8708429 | 8709755 | Hnf4      | 96    | 316.742 | 26.69 |
| chr2L | 8717270 | 8718585 | raw       | 3534  | 316.742 | 41.50 |
| chr2L | 8735513 | 8736154 | raw       | 38    | 316.742 | 22.62 |
| chr2L | 8739826 | 8740736 | raw       | 394   | 316.742 | 21.64 |
| chr2L | 8824977 | 8825815 | SoxN      | 233   | 250.337 | 19.77 |
| chr2L | 8898064 | 8899098 | CG34398   | 124   | 316.742 | 24.88 |
| chr2L | 8937038 | 8937951 | Tsp29Fb   | 74    | 154.628 | 12.52 |
| chr2L | 8949718 | 8950357 | C1GalTA   | 1206  | 316.742 | 21.71 |
| chr2L | 8950931 | 8951888 | C1GalTA   | 28    | 173.914 | 12.94 |
| chr2L | 8955701 | 8956132 | CG31886   | 69    | 39.065  | 6.23  |
| chr2L | 8957632 | 8958583 | CG31886   | 13    | 140.821 | 12.23 |
| chr2L | 8984623 | 8985168 | CG13101   | 62    | 166.286 | 13.67 |
| chr2L | 8988954 | 8989614 | rost      | 5     | 185.019 | 18.32 |
| chr2L | 9125600 | 9125978 | CG32982   | 56    | 31.4312 | 4.96  |
| chr2L | 9164050 | 9164322 | CG13108   | 16    | 15.3953 | 3.76  |
| chr2L | 9166830 | 9167332 | tai       | 280   | 7.87529 | 2.46  |
| chr2L | 9175105 | 9177146 | tai       | 126   | 316.742 | 41.63 |
| chr2L | 9178352 | 9179698 | tai       | 2340  | 163.435 | 12.22 |
| chr2L | 9182480 | 9183072 | tai       | 6431  | 186.913 | 18.03 |
| chr2L | 9203302 | 9204431 | tai       | 27335 | 270.012 | 19.68 |
| chr2L | 9204986 | 9205960 | tai       | 28971 | 316.742 | 23.62 |
| chr2L | 9224159 | 9224963 | aust      | 26622 | 100.326 | 10.45 |
| chr2L | 9225225 | 9225708 | aust      | 25495 | 50.359  | 8.15  |
| chr2L | 9228292 | 9228941 | aust      | 22397 | 189.435 | 13.45 |
| chr2L | 9229741 | 9230265 | aust      | 21090 | 138.684 | 11.28 |
| chr2L | 9231873 | 9232306 | aust      | 18977 | 25.7773 | 5.09  |
| chr2L | 9237612 | 9238243 | aust      | 13248 | 36.8152 | 6.21  |
| chr2L | 9256429 | 9257016 | Ggamma30A | 98    | 55.8418 | 7.18  |
| chr2L | 9272055 | 9272622 | Ggamma30A | 128   | 100.429 | 10.67 |
| chr2L | 9333376 | 9333893 | Eaat1     | 57    | 35.7141 | 5.03  |
| chr2L | 9386347 | 9386614 | Aldh      | 932   | 12.4526 | 2.96  |
| chr2L | 9387438 | 9388474 | Aldh      | 101   | 90.3296 | 9.01  |
| chr2L | 9415080 | 9415454 | Shawl     | 81    | 28.2308 | 5.89  |
| chr2L | 9416097 | 9416683 | Mco1      | 176   | 129.581 | 13.92 |
| chr2L | 9437230 | 9437747 | numb      | 29    | 91.545  | 11.15 |
| chr2L | 9446524 | 9447017 | numb      | 3006  | 56.9927 | 7.54  |
| chr2L | 9448046 | 9450206 | numb      | 53    | 316.742 | 33.39 |
| chr2L | 9493808 | 9494941 | Gdi       | 70    | 76.355  | 7.94  |
| chr2L | 9495418 | 9495686 | CG33298   | 61    | 10.054  | 2.47  |
| chr2L | 9496274 | 9496738 | CG33298   | 1017  | 100.783 | 8.89  |

|       |          |          |             |       |         |       |
|-------|----------|----------|-------------|-------|---------|-------|
| chr2L | 9497148  | 9497733  | CG33298     | 1963  | 196.498 | 12.30 |
| chr2L | 9521124  | 9521930  | Oatp30B     | 476   | 143.16  | 11.70 |
| chr2L | 9522675  | 9523322  | Oatp30B     | 1792  | 298.375 | 19.24 |
| chr2L | 9560413  | 9560784  | jp          | 176   | 14.7145 | 4.10  |
| chr2L | 9566177  | 9567026  | jp          | 14    | 51.5768 | 7.02  |
| chr2L | 9567411  | 9569212  | CR44149     | 1037  | 259.362 | 16.02 |
| chr2L | 9567411  | 9569212  | CG3838      | 1141  | 259.362 | 16.02 |
| chr2L | 9569633  | 9570936  | CG3838      | 168   | 102.628 | 10.94 |
| chr2L | 9576109  | 9576881  | Mtpalpha    | 419   | 61.0323 | 6.76  |
| chr2L | 9613205  | 9614148  | Trx-2       | 4     | 316.742 | 25.90 |
| chr2L | 9616638  | 9617190  | GlcAT-S     | 64    | 155.672 | 14.83 |
| chr2L | 9698152  | 9699519  | Pka-C1      | 23    | 77.9396 | 9.02  |
| chr2L | 9702156  | 9702421  | pelo        | 1494  | 17.9748 | 3.86  |
| chr2L | 9705252  | 9706497  | CG31710     | 72    | 218.303 | 17.39 |
| chr2L | 9728714  | 9729267  | CG13116     | 851   | 12.8646 | 3.33  |
| chr2L | 9729656  | 9730102  | CG13116     | 36    | 23.0887 | 4.17  |
| chr2L | 9734803  | 9735123  | CG13117     | 1716  | 20.6898 | 4.06  |
| chr2L | 9736470  | 9736797  | CG13117     | 4     | 23.665  | 4.37  |
| chr2L | 9743717  | 9744254  | Nckx30C     | 2509  | 47.4605 | 6.71  |
| chr2L | 9744632  | 9745145  | Nckx30C     | 1671  | 119.078 | 12.89 |
| chr2L | 9746003  | 9747050  | Nckx30C     | 306   | 47.0783 | 6.81  |
| chr2L | 9749920  | 9750319  | Cyp4e3      | 58    | 39.894  | 6.31  |
| chr2L | 9757908  | 9759181  | zf30C       | 306   | 63.1089 | 6.04  |
| chr2L | 9779129  | 9779858  | IP3K1       | 2970  | 22.763  | 4.61  |
| chr2L | 9781991  | 9783032  | IP3K1       | 115   | 316.742 | 34.53 |
| chr2L | 9783293  | 9783598  | IP3K1       | 1146  | 8.89369 | 2.83  |
| chr2L | 9790447  | 9790815  | CG4036      | 214   | 25.1315 | 4.22  |
| chr2L | 9863536  | 9863904  | CR43766     | 15413 | 38.9732 | 6.85  |
| chr2L | 9886080  | 9886501  | nAChRalpha6 | 26    | 12.7847 | 3.41  |
| chr2L | 9906850  | 9908081  | CG13124     | 980   | 42.169  | 6.10  |
| chr2L | 9908354  | 9908976  | CG13124     | 68    | 316.742 | 25.16 |
| chr2L | 9915003  | 9915599  | yip2        | 36    | 83.6948 | 7.63  |
| chr2L | 9938679  | 9938953  | Apf         | 23    | 18.3845 | 3.66  |
| chr2L | 9938679  | 9938953  | CG4619      | 49    | 18.3845 | 3.66  |
| chr2L | 9947138  | 9947788  | CG5853      | 65    | 57.9021 | 7.61  |
| chr2L | 9948061  | 9948458  | CG5853      | 659   | 35.3484 | 6.00  |
| chr2L | 9967009  | 9967459  | Dref        | 40    | 39.5223 | 4.68  |
| chr2L | 9967009  | 9967459  | RpL13       | 43    | 39.5223 | 4.68  |
| chr2L | 10009349 | 10010693 | Trp1        | 301   | 316.742 | 20.37 |
| chr2L | 10032519 | 10032899 | obst-B      | 15    | 31.3617 | 5.61  |
| chr2L | 10143280 | 10143755 | CG4839      | 1324  | 18.5762 | 4.39  |
| chr2L | 10180213 | 10180588 | CG44153     | 149   | 19.4026 | 4.37  |
| chr2L | 10208911 | 10209287 | CR44845     | 88    | 72.9821 | 8.75  |
| chr2L | 10220700 | 10221041 | Npc1a       | 69    | 48.2371 | 6.40  |
| chr2L | 10246807 | 10247060 | chico       | 200   | 11.7412 | 3.11  |
| chr2L | 10321457 | 10321959 | CG5381      | 22    | 57.6177 | 7.31  |
| chr2L | 10334388 | 10335251 | GATAd       | 986   | 49.0881 | 6.39  |
| chr2L | 10376301 | 10376671 | dpr19       | 10    | 17.8936 | 4.11  |
| chr2L | 10395917 | 10396306 | Mdh1        | 40    | 12.4855 | 3.26  |
| chr2L | 10457325 | 10457978 | LManII      | 8     | 316.742 | 24.91 |
| chr2L | 10474174 | 10474573 | RluA-1      | 35    | 33.6222 | 6.26  |
| chr2L | 10506537 | 10507037 | Myo31DF     | 27    | 33.7275 | 4.13  |
| chr2L | 10516380 | 10517444 | Fatp        | 122   | 20.9703 | 4.06  |
| chr2L | 10516380 | 10517444 | Lrr47       | 788   | 20.9703 | 4.06  |
| chr2L | 10661967 | 10662297 | CG31871     | 53    | 10.1241 | 2.97  |
| chr2L | 10686832 | 10687433 | CG7296      | 30    | 146.619 | 12.67 |
| chr2L | 10693978 | 10694795 | CG17108     | 544   | 15.3558 | 3.70  |
| chr2L | 10755939 | 10756626 | CG17124     | 34    | 168.066 | 11.87 |
| chr2L | 10756942 | 10757570 | CG17124     | 895   | 152.698 | 11.90 |
| chr2L | 10760062 | 10760451 | CG6495      | 850   | 11.6566 | 3.22  |
| chr2L | 10800902 | 10801385 | CG31869     | 53    | 43.9241 | 6.73  |
| chr2L | 10842244 | 10842561 | CG6700      | 207   | 11.0603 | 3.09  |
| chr2L | 10850045 | 10850851 | CG43129     | 570   | 12.0506 | 3.06  |
| chr2L | 10850045 | 10850851 | porin       | 138   | 12.0506 | 3.06  |
| chr2L | 10856381 | 10856646 | Dnz1        | 169   | 5.97227 | 2.22  |
| chr2L | 10967158 | 10967979 | CG33129     | 732   | 237.9   | 16.34 |
| chr2L | 10976937 | 10977353 | SCAR        | 214   | 9.98162 | 2.87  |
| chr2L | 11044445 | 11045674 | CG18666     | 10534 | 254.257 | 18.88 |
| chr2L | 11052808 | 11053210 | Samuel      | 4474  | 14.1546 | 3.96  |
| chr2L | 11057092 | 11058724 | Samuel      | 388   | 291.343 | 22.96 |
| chr2L | 11061203 | 11061454 | Samuel      | 3765  | 8.525   | 2.74  |
| chr2L | 11066271 | 11067333 | Samuel      | 50    | 288.39  | 20.57 |
| chr2L | 11086491 | 11086956 | CG16854     | 44    | 65.1514 | 7.73  |
| chr2L | 11106675 | 11107044 | I(2)gd1     | 6     | 16.1019 | 3.33  |
| chr2L | 11112914 | 11113603 | CG6201      | 9     | 18.3114 | 3.92  |

|       |          |          |                  |       |         |       |
|-------|----------|----------|------------------|-------|---------|-------|
| chr2L | 11130650 | 11131139 | CG4751           | 260   | 24.119  | 4.82  |
| chr2L | 11136206 | 11136465 | hgo              | 50    | 19.3066 | 4.71  |
| chr2L | 11155346 | 11156100 | CG6287           | 69    | 316.742 | 29.98 |
| chr2L | 11167243 | 11168429 | Ca-beta          | 250   | 31.0719 | 5.48  |
| chr2L | 11168708 | 11169213 | Ca-beta          | 1002  | 68.2663 | 8.32  |
| chr2L | 11182600 | 11182951 | CG4788           | 3741  | 21.487  | 5.00  |
| chr2L | 11203403 | 11204219 | Ca-beta          | 384   | 26.4355 | 4.81  |
| chr2L | 11210397 | 11211287 | ab               | 469   | 13.0311 | 3.32  |
| chr2L | 11220014 | 11220347 | ab               | 8364  | 13.3929 | 3.97  |
| chr2L | 11221096 | 11221705 | ab               | 9608  | 176.725 | 12.17 |
| chr2L | 11271538 | 11272343 | cana             | 16    | 316.742 | 27.79 |
| chr2L | 11278008 | 11278426 | CG33695          | 64    | 43.1781 | 5.57  |
| chr2L | 11278008 | 11278426 | CG33695          | 64    | 43.1781 | 5.57  |
| chr2L | 11329508 | 11329945 | CR44584          | 2977  | 8.4006  | 2.75  |
| chr2L | 11358362 | 11359128 | salr             | 166   | 316.742 | 23.71 |
| chr2L | 11445421 | 11446501 | salm             | 244   | 316.742 | 22.50 |
| chr2L | 11447226 | 11448175 | salm             | 2273  | 316.742 | 33.15 |
| chr2L | 11501542 | 11501920 | spz4             | 36    | 35.7647 | 6.85  |
| chr2L | 11516279 | 11517367 | CG6509           | 289   | 140.498 | 11.99 |
| chr2L | 11527975 | 11528458 | CG31705          | 14    | 246.277 | 16.28 |
| chr2L | 11528757 | 11529015 | CG31705          | 696   | 32.297  | 5.43  |
| chr2L | 11581638 | 11582197 | kek2             | 58    | 65.56   | 9.04  |
| chr2L | 11804377 | 11805295 | crol             | 4091  | 259.14  | 17.31 |
| chr2L | 11805990 | 11809548 | crol             | 1991  | 316.742 | 33.38 |
| chr2L | 11842485 | 11843234 | CG14933          | 100   | 28.07   | 5.34  |
| chr2L | 11842485 | 11843234 | CG42486          | 100   | 28.07   | 5.34  |
| chr2L | 11874410 | 11875234 | Pde1c            | 619   | 62.2723 | 7.93  |
| chr2L | 11878871 | 11879383 | Pde1c            | 1878  | 88.6157 | 8.68  |
| chr2L | 11903448 | 11903821 | Pde1c            | 6860  | 51.2876 | 7.70  |
| chr2L | 11948558 | 11949316 | CG16964          | 1137  | 89.052  | 10.33 |
| chr2L | 11970271 | 11971572 | CR43314          | 167   | 316.742 | 31.90 |
| chr2L | 12002994 | 12007865 | Rh5              | 647   | 197.847 | 14.85 |
| chr2L | 12010013 | 12012722 | CR44588          | 2866  | 114.498 | 8.73  |
| chr2L | 12025279 | 12025754 | CR44587          | 307   | 39.491  | 5.79  |
| chr2L | 12044589 | 12046618 | CG6785           | 957   | 217.998 | 13.81 |
| chr2L | 12044589 | 12046618 | CG6770           | 39    | 217.998 | 13.81 |
| chr2L | 12044589 | 12046618 | CR44589          | 284   | 217.998 | 13.81 |
| chr2L | 12055710 | 12056387 | Jhl-21           | 1     | 316.742 | 32.97 |
| chr2L | 12055710 | 12056387 | RpL7-like        | 339   | 316.742 | 32.97 |
| chr2L | 12055710 | 12056387 | CG34164          | 361   | 316.742 | 32.97 |
| chr2L | 12055710 | 12056387 | RpL7-like        | 361   | 316.742 | 32.97 |
| chr2L | 12085846 | 12086097 | prd              | 156   | 19.4412 | 4.52  |
| chr2L | 12108648 | 12109200 | Rab6             | 134   | 86.1631 | 9.93  |
| chr2L | 12133937 | 12134960 | rho-6            | 717   | 112.688 | 9.38  |
| chr2L | 12142489 | 12142923 | CG31760          | 39    | 48.5443 | 7.45  |
| chr2L | 12177495 | 12178008 | atilla           | 104   | 36.385  | 6.04  |
| chr2L | 12207643 | 12208099 | CG31759          | 86    | 37.8802 | 5.53  |
| chr2L | 12286778 | 12287383 | aret             | 229   | 65.0141 | 8.41  |
| chr2L | 12288516 | 12288996 | aret             | 1500  | 180.45  | 16.00 |
| chr2L | 12294607 | 12295123 | aret             | 7687  | 18.9856 | 4.49  |
| chr2L | 12298012 | 12298311 | aret             | 10913 | 14.2996 | 4.00  |
| chr2L | 12341720 | 12342031 | bru-2            | 2354  | 19.7607 | 4.83  |
| chr2L | 12364354 | 12364622 | bru-2            | 1861  | 18.5777 | 4.40  |
| chr2L | 12365363 | 12366621 | bru-2            | 147   | 316.742 | 34.37 |
| chr2L | 12367324 | 12367685 | bru-2            | 1116  | 22.3043 | 4.00  |
| chr2L | 12369728 | 12370108 | bru-2            | 17    | 9.07242 | 3.08  |
| chr2L | 12404387 | 12404774 | vir-1            | 72    | 42.1634 | 5.54  |
| chr2L | 12418167 | 12418595 | vir-1            | 3505  | 13.0722 | 3.69  |
| chr2L | 12421622 | 12422215 | vir-1            | 78    | 316.742 | 24.13 |
| chr2L | 12433652 | 12434050 | SC35             | 103   | 12.7152 | 3.07  |
| chr2L | 12434389 | 12435083 | Elf              | 338   | 40.7545 | 5.80  |
| chr2L | 12434389 | 12435083 | SC35             | 124   | 40.7545 | 5.80  |
| chr2L | 12434389 | 12435083 | Elf              | 102   | 40.7545 | 5.80  |
| chr2L | 12436320 | 12436696 | Elf              | 230   | 27.0549 | 4.53  |
| chr2L | 12459781 | 12461863 | mir-967          | 1243  | 316.742 | 45.90 |
| chr2L | 12459781 | 12461863 | bun              | 87    | 316.742 | 45.90 |
| chr2L | 12482780 | 12484735 | bun              | 407   | 316.742 | 33.68 |
| chr2L | 12492001 | 12492622 | bun              | 405   | 146.912 | 14.63 |
| chr2L | 12504121 | 12505628 | bun              | 114   | 260.795 | 19.21 |
| chr2L | 12507451 | 12508320 | CR43051          | 157   | 316.742 | 30.42 |
| chr2L | 12507451 | 12508320 | snoRNA:CG43051-a | 326   | 316.742 | 30.42 |
| chr2L | 12520887 | 12522082 | snoRNA:CG43051-a | 13135 | 316.742 | 31.58 |
| chr2L | 12527583 | 12528618 | bun              | 13139 | 29.6459 | 5.58  |
| chr2L | 12528945 | 12530788 | bun              | 11031 | 316.742 | 32.39 |
| chr2L | 12535197 | 12536012 | bun              | 5260  | 52.925  | 8.48  |

|       |          |          |                |       |         |       |
|-------|----------|----------|----------------|-------|---------|-------|
| chr2L | 12540086 | 12540597 | bun            | 377   | 14.4479 | 3.43  |
| chr2L | 12542948 | 12544320 | CR42746        | 148   | 316.742 | 56.16 |
| chr2L | 12545505 | 12546812 | bun            | 750   | 316.742 | 34.55 |
| chr2L | 12586731 | 12587610 | nub            | 456   | 316.742 | 26.13 |
| chr2L | 12617769 | 12618884 | nub            | 114   | 316.742 | 32.29 |
| chr2L | 12655562 | 12656282 | pdm2           | 1247  | 316.742 | 40.62 |
| chr2L | 12678203 | 12678650 | pdm2           | 167   | 41.5816 | 7.11  |
| chr2L | 12700513 | 12700771 | CG17036        | 34    | 19.4412 | 4.52  |
| chr2L | 12704421 | 12704870 | CG5776         | 121   | 11.2158 | 2.97  |
| chr2L | 12704421 | 12704870 | spict          | 152   | 11.2158 | 2.97  |
| chr2L | 12718579 | 12719382 | MRP            | 73    | 316.742 | 18.86 |
| chr2L | 12719988 | 12720462 | MRP            | 1154  | 26.8074 | 4.76  |
| chr2L | 12721235 | 12721538 | Pih1D1         | 520   | 11.4543 | 3.31  |
| chr2L | 12822483 | 12823070 | kek1           | 18    | 79.0479 | 9.41  |
| chr2L | 12854509 | 12854914 | CR44971        | 13175 | 71.5795 | 9.66  |
| chr2L | 12973997 | 12975492 | Vha68-2        | 76    | 294.494 | 20.03 |
| chr2L | 13003693 | 13004128 | Vha68-1        | 251   | 21.0477 | 4.12  |
| chr2L | 13021092 | 13021380 | A16            | 161   | 7.99966 | 2.56  |
| chr2L | 13032593 | 13032947 | A16            | 11442 | 27.7607 | 5.51  |
| chr2L | 13035713 | 13036330 | A16            | 14728 | 108.123 | 11.66 |
| chr2L | 13059904 | 13060766 | CG9932         | 187   | 316.742 | 32.10 |
| chr2L | 13069100 | 13069513 | CG9932         | 9221  | 16.9722 | 3.98  |
| chr2L | 13089649 | 13090034 | CR44197        | 3     | 20.8104 | 4.68  |
| chr2L | 13090829 | 13091122 | CR44197        | 1175  | 19.2011 | 4.46  |
| chr2L | 13097999 | 13098889 | CR45447        | 1353  | 316.742 | 19.65 |
| chr2L | 13099420 | 13099847 | CR45447        | 2626  | 26.8822 | 4.40  |
| chr2L | 13101509 | 13101819 | CR45461        | 3038  | 9.9796  | 2.74  |
| chr2L | 13113646 | 13113927 | CR44198        | 5535  | 14.8931 | 3.88  |
| chr2L | 13139409 | 13140254 | CG9928         | 2881  | 15.1828 | 3.66  |
| chr2L | 13156051 | 13156915 | Pk34A          | 2533  | 34.841  | 5.41  |
| chr2L | 13165422 | 13166307 | Sirt1          | 298   | 316.742 | 19.80 |
| chr2L | 13165422 | 13166307 | DnaJ-H         | 211   | 316.742 | 19.80 |
| chr2L | 13191182 | 13191738 | CG16974        | 570   | 17.2664 | 3.73  |
| chr2L | 13203596 | 13204295 | Pect           | 166   | 165.441 | 11.42 |
| chr2L | 13205075 | 13205558 | Pect           | 1488  | 23.7739 | 4.06  |
| chr2L | 13206165 | 13206628 | Pect           | 2511  | 16.1395 | 3.61  |
| chr2L | 13207153 | 13207467 | Pect           | 3554  | 7.87137 | 2.70  |
| chr2L | 13215710 | 13216117 | snRNA:U2:34ABb | 60    | 43.9502 | 6.05  |
| chr2L | 13215710 | 13216117 | snRNA:U2:34ABc | 60    | 43.9502 | 6.05  |
| chr2L | 13240008 | 13240284 | CG5945         | 38    | 9.98625 | 3.16  |
| chr2L | 13290245 | 13291313 | CG31729        | 196   | 316.742 | 30.11 |
| chr2L | 13295914 | 13297128 | CG31729        | 552   | 121.76  | 10.39 |
| chr2L | 13330922 | 13331517 | CG43778        | 84    | 122.937 | 12.70 |
| chr2L | 13331798 | 13332404 | CG43778        | 928   | 160.027 | 13.83 |
| chr2L | 13354496 | 13354817 | CG9395         | 390   | 23.5235 | 4.98  |
| chr2L | 13362993 | 13363305 | CG9377         | 1638  | 32.4941 | 4.91  |
| chr2L | 13373517 | 13373791 | CG9305         | 227   | 13.3268 | 3.26  |
| chr2L | 13400493 | 13400866 | CR44600        | 787   | 13.9887 | 3.73  |
| chr2L | 13415012 | 13415575 | CG42784        | 127   | 90.2117 | 9.16  |
| chr2L | 13415012 | 13415575 | CG43850        | 127   | 90.2117 | 9.16  |
| chr2L | 13418949 | 13419395 | CG43850        | 60    | 44.4712 | 7.32  |
| chr2L | 13460672 | 13461928 | CG42784        | 395   | 119.952 | 14.70 |
| chr2L | 13485855 | 13486323 | CG42784        | 10019 | 66.3745 | 8.18  |
| chr2L | 13511273 | 13511764 | CG42784        | 15512 | 42.6146 | 6.49  |
| chr2L | 13512615 | 13514898 | CG33640        | 14356 | 316.742 | 47.65 |
| chr2L | 13547590 | 13548154 | B4             | 65    | 25.0419 | 5.01  |
| chr2L | 13548449 | 13549509 | B4             | 78    | 94.0342 | 8.07  |
| chr2L | 13550003 | 13551096 | kuz            | 700   | 316.742 | 30.57 |
| chr2L | 13571758 | 13572203 | CR44973        | 10524 | 39.3302 | 7.25  |
| chr2L | 13641044 | 13641310 | ics            | 126   | 19.0085 | 4.29  |
| chr2L | 13664752 | 13666476 | CG18507        | 637   | 316.742 | 29.96 |
| chr2L | 13717175 | 13717582 | CG31814        | 80    | 30.6062 | 6.26  |
| chr2L | 13779853 | 13780890 | CG9008         | 66    | 58.1228 | 7.16  |
| chr2L | 13779853 | 13780890 | p38b           | 589   | 58.1228 | 7.16  |
| chr2L | 13793539 | 13793853 | Sec71          | 207   | 12.6962 | 3.00  |
| chr2L | 13802123 | 13802658 | CAH1           | 1242  | 61.9953 | 7.03  |
| chr2L | 13803184 | 13804060 | CAH1           | 102   | 316.742 | 28.43 |
| chr2L | 13820849 | 13821514 | b              | 42    | 43.899  | 7.10  |
| chr2L | 13835441 | 13835748 | CenG1A         | 36    | 24.2942 | 4.23  |
| chr2L | 13877860 | 13878403 | CenG1A         | 809   | 139.506 | 11.05 |
| chr2L | 13878732 | 13879248 | CenG1A         | 43    | 142.029 | 11.55 |
| chr2L | 13904067 | 13904698 | Smg5           | 54    | 32.2279 | 4.93  |
| chr2L | 13905150 | 13905899 | Ance           | 6     | 248.549 | 16.68 |
| chr2L | 13934663 | 13934987 | CG16885        | 124   | 29.2681 | 5.94  |
| chr2L | 13976995 | 13977548 | Cyp28a5        | 46    | 210.164 | 19.67 |

|       |          |          |             |       |         |       |
|-------|----------|----------|-------------|-------|---------|-------|
| chr2L | 14021502 | 14022761 | CR45352     | 202   | 109.537 | 9.50  |
| chr2L | 14023603 | 14024607 | CR31840     | 213   | 306.772 | 19.42 |
| chr2L | 14038676 | 14039195 | CR45284     | 655   | 41.2305 | 5.75  |
| chr2L | 14039673 | 14040570 | nAChRalpha5 | 105   | 40.905  | 6.96  |
| chr2L | 14049728 | 14050148 | NimC4       | 2326  | 46.585  | 8.01  |
| chr2L | 14054200 | 14054734 | NimC4       | 6859  | 48.2567 | 7.59  |
| chr2L | 14094644 | 14094957 | CG16879     | 9639  | 32.9577 | 4.83  |
| chr2L | 14110517 | 14111259 | CG31769     | 356   | 25.2963 | 4.66  |
| chr2L | 14115772 | 14116547 | CG31769     | 5603  | 39.5286 | 6.67  |
| chr2L | 14133307 | 14134611 | CG17341     | 325   | 131.876 | 15.62 |
| chr2L | 14150397 | 14150841 | CG43332     | 12671 | 10.9793 | 3.53  |
| chr2L | 14204149 | 14204576 | Dyrk2       | 6662  | 9.68554 | 3.30  |
| chr2L | 14225869 | 14226201 | Dyrk2       | 8081  | 38.1318 | 5.28  |
| chr2L | 14227633 | 14227960 | Dyrk2       | 6277  | 21.3932 | 4.53  |
| chr2L | 14228275 | 14228563 | Dyrk2       | 5675  | 17.7712 | 3.52  |
| chr2L | 14229950 | 14230561 | Dyrk2       | 3868  | 126.946 | 12.10 |
| chr2L | 14233890 | 14234893 | Dyrk2       | 20    | 103.13  | 8.70  |
| chr2L | 14233890 | 14234893 | CR44727     | 607   | 103.13  | 8.70  |
| chr2L | 14244235 | 14244628 | CR44216     | 3279  | 30.3262 | 5.14  |
| chr2L | 14287938 | 14288230 | CR43639     | 3104  | 26.9717 | 4.79  |
| chr2L | 14334009 | 14334352 | CG33090     | 14    | 19.5723 | 3.77  |
| chr2L | 14355022 | 14355832 | I(2)34Fd    | 430   | 119.669 | 10.20 |
| chr2L | 14355022 | 14355832 | Rab14       | 371   | 119.669 | 10.20 |
| chr2L | 14385044 | 14385684 | ppk         | 4210  | 219.955 | 13.62 |
| chr2L | 14409303 | 14410698 | elB         | 182   | 316.742 | 45.00 |
| chr2L | 14409303 | 14410698 | CR44733     | 23    | 316.742 | 45.00 |
| chr2L | 14458533 | 14458860 | CR44730     | 1529  | 9.05003 | 2.90  |
| chr2L | 14489925 | 14491142 | noc         | 116   | 316.742 | 41.67 |
| chr2L | 14529648 | 14529908 | CR44852     | 3747  | 9.67825 | 3.19  |
| chr2L | 14533249 | 14534721 | CR44852     | 956   | 22.432  | 4.68  |
| chr2L | 14614724 | 14615734 | Adhr        | 2     | 96.6725 | 8.87  |
| chr2L | 14614724 | 14615734 | Adh         | 2     | 96.6725 | 8.87  |
| chr2L | 14632008 | 14632355 | Adhr        | 14622 | 19.0028 | 4.42  |
| chr2L | 14688830 | 14689815 | osp         | 30    | 131.629 | 11.39 |
| chr2L | 14706240 | 14706596 | CG15282     | 6064  | 40.3339 | 4.99  |
| chr2L | 14797508 | 14797977 | CG18420     | 1088  | 76.9565 | 8.95  |
| chr2L | 14851647 | 14851959 | CG15279     | 49    | 14.1584 | 3.51  |
| chr2L | 14972107 | 14972641 | CG42313     | 90    | 72.6947 | 9.20  |
| chr2L | 14995383 | 14996135 | mol         | 1904  | 238.689 | 17.70 |
| chr2L | 14997300 | 14997954 | mol         | 25    | 316.742 | 24.92 |
| chr2L | 15011880 | 15012315 | CR43856     | 579   | 17.3238 | 3.74  |
| chr2L | 15013487 | 15013912 | CR43856     | 1008  | 33.0161 | 6.04  |
| chr2L | 15016243 | 15016501 | GABA-B-R1   | 9     | 11.6988 | 3.59  |
| chr2L | 15035269 | 15035829 | yellow-c    | 12    | 57.1183 | 8.03  |
| chr2L | 15039415 | 15039891 | Su(H)       | 238   | 28.2173 | 4.83  |
| chr2L | 15056622 | 15057802 | ck          | 732   | 316.742 | 35.69 |
| chr2L | 15067770 | 15068266 | vig         | 15    | 26.2698 | 4.40  |
| chr2L | 15074424 | 15074908 | CG15270     | 83    | 53.4937 | 6.66  |
| chr2L | 15109005 | 15109557 | CG15269     | 72    | 110.244 | 13.26 |
| chr2L | 15113290 | 15113628 | stc         | 62    | 13.686  | 3.41  |
| chr2L | 15200304 | 15200821 | CG4168      | 115   | 30.1853 | 6.16  |
| chr2L | 15264293 | 15265017 | yuri        | 26    | 316.742 | 40.30 |
| chr2L | 15332515 | 15332948 | esg         | 1136  | 129.57  | 11.38 |
| chr2L | 15333277 | 15334172 | esg         | 259   | 316.742 | 25.10 |
| chr2L | 15339423 | 15340058 | esg         | 5847  | 164.988 | 15.24 |
| chr2L | 15425635 | 15426443 | wor         | 431   | 316.742 | 24.13 |
| chr2L | 15491563 | 15492542 | CR45293     | 6214  | 79.9154 | 9.16  |
| chr2L | 15498837 | 15499906 | lace        | 480   | 316.742 | 20.49 |
| chr2L | 15552449 | 15552901 | kek3        | 62    | 43.5716 | 7.23  |
| chr2L | 15745456 | 15746957 | CR44974     | 521   | 127.747 | 12.45 |
| chr2L | 15745456 | 15746957 | CycE        | 875   | 127.747 | 12.45 |
| chr2L | 15747298 | 15748431 | CR44866     | 359   | 284.14  | 17.04 |
| chr2L | 15747298 | 15748431 | CycE        | 509   | 284.14  | 17.04 |
| chr2L | 15761873 | 15763091 | Gli         | 24    | 316.742 | 21.98 |
| chr2L | 15911612 | 15912987 | CR44867     | 259   | 316.742 | 31.60 |
| chr2L | 15911612 | 15912987 | CR44868     | 608   | 316.742 | 31.60 |
| chr2L | 15913289 | 15913888 | CR44868     | 1077  | 61.4595 | 7.16  |
| chr2L | 15962332 | 15962670 | beat-lb     | 69    | 31.2105 | 5.83  |
| chr2L | 16000156 | 16000592 | beat-lc     | 90    | 66.7095 | 10.03 |
| chr2L | 16049613 | 16050192 | beat-la     | 62    | 73.6935 | 9.28  |
| chr2L | 16168954 | 16169275 | Ca-alpha1D  | 745   | 24.8247 | 5.11  |
| chr2L | 16198191 | 16198600 | CR44735     | 2119  | 44.7029 | 7.81  |
| chr2L | 16231147 | 16231735 | CG42817     | 46    | 96.2634 | 10.50 |
| chr2L | 16234911 | 16235253 | CG42817     | 3612  | 19.1368 | 4.59  |
| chr2L | 16251440 | 16252128 | PRL-1       | 57    | 316.742 | 32.62 |



|       |          |          |                    |       |         |       |
|-------|----------|----------|--------------------|-------|---------|-------|
| chr2L | 16256958 | 16257669 | PRL-1              | 43    | 17.3792 | 3.85  |
| chr2L | 16267902 | 16270110 | CG4935             | 7528  | 316.742 | 39.81 |
| chr2L | 16271206 | 16271915 | CG4935             | 9439  | 316.742 | 22.80 |
| chr2L | 16273503 | 16274513 | CG4935             | 11555 | 40.7026 | 5.86  |
| chr2L | 16276787 | 16277245 | crp                | 10773 | 49.343  | 7.13  |
| chr2L | 16279588 | 16280284 | crp                | 7656  | 91.1664 | 11.47 |
| chr2L | 16284200 | 16285269 | crp                | 2941  | 316.742 | 40.87 |
| chr2L | 16285955 | 16288883 | crp                | 929   | 316.742 | 26.21 |
| chr2L | 16285955 | 16288883 | pkaap              | 1488  | 316.742 | 26.21 |
| chr2L | 16299284 | 16299909 | heix               | 224   | 249.174 | 15.48 |
| chr2L | 16315004 | 16315362 | fzy                | 4204  | 30.4622 | 4.92  |
| chr2L | 16318263 | 16318540 | cact               | 6999  | 15.6177 | 3.70  |
| chr2L | 16324809 | 16326259 | cact               | 130   | 195.97  | 11.24 |
| chr2L | 16350243 | 16351445 | chif               | 757   | 64.8459 | 7.45  |
| chr2L | 16351704 | 16353326 | CG42231            | 372   | 36.8578 | 5.37  |
| chr2L | 16351704 | 16353326 | chif               | 372   | 36.8578 | 5.37  |
| chr2L | 16351704 | 16353326 | CG4455             | 677   | 36.8578 | 5.37  |
| chr2L | 16356514 | 16356880 | CaBP1              | 54    | 39.1347 | 5.32  |
| chr2L | 16365676 | 16365979 | jhamt              | 80    | 17.9011 | 4.31  |
| chr2L | 16422498 | 16423462 | snoRNA:Me28S-A295f | 4953  | 316.742 | 32.52 |
| chr2L | 16447051 | 16447592 | ldgf2              | 34    | 66.6063 | 8.04  |
| chr2L | 16447932 | 16449379 | CG5888             | 537   | 295.804 | 20.74 |
| chr2L | 16447932 | 16449379 | ldgf2              | 18    | 295.804 | 20.74 |
| chr2L | 16450814 | 16451550 | ldgf3              | 140   | 316.742 | 31.12 |
| chr2L | 16485515 | 16487019 | dac                | 476   | 316.742 | 19.03 |
| chr2L | 16491245 | 16492078 | Tpr2               | 40    | 19.7065 | 3.46  |
| chr2L | 16492514 | 16492991 | Tpr2               | 1100  | 12.5392 | 3.15  |
| chr2L | 16496434 | 16496944 | Tpr2               | 94    | 229.01  | 19.28 |
| chr2L | 16501174 | 16501568 | Tpr2               | 524   | 59.1122 | 8.11  |
| chr2L | 16519954 | 16522722 | CG5953             | 116   | 316.742 | 24.40 |
| chr2L | 16523030 | 16523608 | CG5953             | 3130  | 81.2483 | 8.11  |
| chr2L | 16525857 | 16526710 | mir-4943           | 2104  | 316.742 | 37.02 |
| chr2L | 16532594 | 16533772 | CG5953             | 184   | 316.742 | 28.44 |
| chr2L | 16534053 | 16534628 | CR45354            | 191   | 316.742 | 20.19 |
| chr2L | 16534912 | 16535218 | CR45355            | 176   | 18.0307 | 3.92  |
| chr2L | 16535501 | 16536420 | CR45355            | 565   | 293.895 | 21.84 |
| chr2L | 16543865 | 16546313 | CG42389            | 108   | 316.742 | 20.38 |
| chr2L | 16548003 | 16548516 | CG5968             | 1618  | 296.507 | 23.69 |
| chr2L | 16587736 | 16589225 | CG42389            | 13714 | 316.742 | 27.72 |
| chr2L | 16601337 | 16602630 | CG42389            | 225   | 316.742 | 24.75 |
| chr2L | 16679994 | 16680527 | grp                | 351   | 16.6485 | 3.45  |
| chr2L | 16679994 | 16680527 | squ                | 351   | 16.6485 | 3.45  |
| chr2L | 16679994 | 16680527 | grp                | 351   | 16.6485 | 3.45  |
| chr2L | 16679994 | 16680527 | squ                | 351   | 16.6485 | 3.45  |
| chr2L | 16684794 | 16685709 | grp                | 60    | 197.851 | 15.29 |
| chr2L | 16689669 | 16690821 | grp                | 5146  | 54.1303 | 7.39  |
| chr2L | 16715590 | 16716879 | Cyt-c-d            | 217   | 316.742 | 24.29 |
| chr2L | 16715590 | 16716879 | CG31808            | 18    | 316.742 | 24.29 |
| chr2L | 16718528 | 16718989 | Cyt-c-p            | 1100  | 33.3385 | 5.77  |
| chr2L | 16719745 | 16721544 | Cyt-c-p            | 1270  | 138.069 | 10.05 |
| chr2L | 16727458 | 16727851 | VhaSFD             | 77    | 16.1989 | 3.72  |
| chr2L | 16743050 | 16743684 | LSm7               | 452   | 26.7167 | 4.33  |
| chr2L | 16743050 | 16743684 | BuGZ               | 148   | 26.7167 | 4.33  |
| chr2L | 16754066 | 16754546 | yellow-b           | 52    | 65.012  | 7.78  |
| chr2L | 16791265 | 16792369 | CG17928            | 47    | 316.742 | 23.96 |
| chr2L | 16798700 | 16799267 | Ugt36Bc            | 56    | 316.742 | 28.10 |
| chr2L | 16816519 | 16816873 | mdy                | 30    | 65.4828 | 7.62  |
| chr2L | 16824879 | 16825201 | Cas                | 176   | 11.3159 | 3.33  |
| chr2L | 16852195 | 16852452 | CG31810            | 51    | 13.7402 | 3.08  |
| chr2L | 16858098 | 16859603 | CG31809            | 87    | 241.484 | 23.18 |
| chr2L | 16862601 | 16863022 | CR43858            | 1352  | 28.2939 | 5.16  |
| chr2L | 16877582 | 16878021 | CG32832            | 1520  | 10.8303 | 3.17  |
| chr2L | 16880795 | 16881479 | CG31743            | 122   | 316.742 | 24.26 |
| chr2L | 16887714 | 16888081 | CG6115             | 43    | 24.3905 | 4.29  |
| chr2L | 16888380 | 16889080 | tweek              | 46    | 11.5829 | 2.97  |
| chr2L | 16888380 | 16889080 | CR44392            | 29    | 11.5829 | 2.97  |
| chr2L | 16972720 | 16973298 | beat-IIIb          | 118   | 72.3722 | 8.38  |
| chr2L | 17102366 | 17102746 | CR45448            | 2638  | 56.4866 | 9.04  |
| chr2L | 17130802 | 17131322 | beat-IIIa          | 28    | 66.2073 | 7.73  |
| chr2L | 17130802 | 17131322 | CG34106            | 28    | 66.2073 | 7.73  |
| chr2L | 17382649 | 17383064 | Lrch               | 1273  | 26.8457 | 5.09  |
| chr2L | 17383852 | 17384255 | Lrch               | 51    | 44.9666 | 5.26  |
| chr2L | 17384600 | 17385525 | CLIP-190           | 323   | 38.9044 | 5.57  |
| chr2L | 17387695 | 17388300 | CLIP-190           | 1252  | 30.8981 | 4.58  |
| chr2L | 17388967 | 17389589 | CLIP-190           | 63    | 316.742 | 25.41 |

|       |          |          |          |       |         |       |
|-------|----------|----------|----------|-------|---------|-------|
| chr2L | 17410375 | 17410646 | Rpb11    | 9     | 6.34221 | 2.33  |
| chr2L | 17410375 | 17410646 | CG15141  | 225   | 6.34221 | 2.33  |
| chr2L | 17427423 | 17428507 | Dif      | 27    | 316.742 | 26.32 |
| chr2L | 17429689 | 17430190 | CR44409  | 221   | 166.127 | 13.75 |
| chr2L | 17430954 | 17431376 | CR44409  | 1447  | 104.541 | 10.72 |
| chr2L | 17433086 | 17433438 | Dif      | 135   | 23.3675 | 4.88  |
| chr2L | 17448066 | 17448808 | dl       | 91    | 94.2182 | 9.41  |
| chr2L | 17449493 | 17450738 | dl       | 120   | 253.921 | 16.33 |
| chr2L | 17449493 | 17450738 | CR46204  | 9     | 253.921 | 16.33 |
| chr2L | 17450999 | 17451312 | CR46204  | 646   | 32.3855 | 5.66  |
| chr2L | 17466208 | 17466899 | Sgt      | 5270  | 9.40611 | 3.12  |
| chr2L | 17471676 | 17472026 | Sgt      | 241   | 31.3675 | 5.07  |
| chr2L | 17472474 | 17473355 | BicD     | 491   | 30.4622 | 4.92  |
| chr2L | 17558401 | 17558794 | CR45919  | 2254  | 13.3343 | 3.53  |
| chr2L | 17560279 | 17560980 | CR45919  | 107   | 39.2811 | 6.19  |
| chr2L | 17574504 | 17574971 | mir-287  | 221   | 31.0683 | 5.20  |
| chr2L | 17575334 | 17575735 | CR45358  | 11    | 22.3373 | 4.80  |
| chr2L | 17589190 | 17589499 | Oli      | 35    | 16.8563 | 4.14  |
| chr2L | 17592245 | 17592579 | Sytalpha | 138   | 13.0631 | 3.63  |
| chr2L | 17592245 | 17592579 | CG6870   | 98    | 13.0631 | 3.63  |
| chr2L | 17621211 | 17621581 | CR44413  | 4238  | 27.0784 | 4.69  |
| chr2L | 17735489 | 17736012 | CadN     | 16595 | 98.2341 | 12.51 |
| chr2L | 17751037 | 17751697 | CadN     | 1105  | 53.2496 | 8.09  |
| chr2L | 17752283 | 17752976 | CadN     | 326   | 237.514 | 23.54 |
| chr2L | 17754009 | 17754536 | CadN     | 1968  | 33.1559 | 6.56  |
| chr2L | 17778272 | 17778576 | CadN     | 86    | 18.301  | 4.40  |
| chr2L | 17843489 | 17843945 | CadN2    | 98    | 31.3257 | 5.19  |
| chr2L | 17963195 | 17963639 | CG5674   | 17    | 20.7834 | 4.35  |
| chr2L | 18141543 | 18141974 | CR44478  | 3372  | 51.473  | 6.85  |
| chr2L | 18149979 | 18150894 | Socs36E  | 1742  | 62.739  | 8.49  |
| chr2L | 18151234 | 18152725 | Socs36E  | 811   | 104.432 | 9.45  |
| chr2L | 18155751 | 18156593 | CG5783   | 283   | 175.025 | 15.49 |
| chr2L | 18184428 | 18185415 | Ptp36E   | 104   | 147.696 | 16.12 |
| chr2L | 18275602 | 18276166 | CG42750  | 184   | 47.7485 | 7.92  |
| chr2L | 18313600 | 18314310 | CR44489  | 229   | 38.7035 | 5.73  |
| chr2L | 18319904 | 18320350 | Fas3     | 37    | 90.8996 | 8.55  |
| chr2L | 18326995 | 18328030 | Fas3     | 7158  | 68.9155 | 8.00  |
| chr2L | 18395301 | 18395682 | CR44486  | 5010  | 16.3847 | 3.53  |
| chr2L | 18455240 | 18456551 | let-7-C  | 112   | 316.742 | 22.62 |
| chr2L | 18456961 | 18457331 | let-7-C  | 1442  | 30.3802 | 5.42  |
| chr2L | 18458483 | 18459158 | let-7-C  | 2950  | 25.8391 | 4.64  |
| chr2L | 18459694 | 18460486 | let-7-C  | 4257  | 300.994 | 19.35 |
| chr2L | 18465164 | 18466173 | mir-100  | 5571  | 84.0753 | 9.09  |
| chr2L | 18469478 | 18470043 | mir-100  | 1627  | 107.456 | 10.39 |
| chr2L | 18483796 | 18484750 | CG10283  | 15    | 316.742 | 17.78 |
| chr2L | 18485172 | 18485587 | CG10176  | 25    | 42.8099 | 5.87  |
| chr2L | 18509339 | 18509631 | CG10178  | 61    | 10.7391 | 2.95  |
| chr2L | 18517132 | 18517629 | CG10211  | 145   | 89.052  | 10.33 |
| chr2L | 18553985 | 18554248 | Pde11    | 9108  | 10.1941 | 3.21  |
| chr2L | 18557473 | 18558538 | Pde11    | 5133  | 186.269 | 15.79 |
| chr2L | 18561690 | 18563604 | Pde11    | 116   | 159.579 | 10.37 |
| chr2L | 18569961 | 18570311 | Pde11    | 2161  | 33.3861 | 5.78  |
| chr2L | 18571575 | 18573297 | Pde11    | 3     | 252.466 | 16.55 |
| chr2L | 18604738 | 18605048 | CG10413  | 183   | 10.6639 | 3.01  |
| chr2L | 18617069 | 18617522 | MESR3    | 5     | 58.8054 | 8.36  |
| chr2L | 18629005 | 18629655 | MESR3    | 12111 | 316.742 | 26.44 |
| chr2L | 18677205 | 18677898 | CG31751  | 255   | 37.2295 | 5.04  |
| chr2L | 18695289 | 18695782 | CG10383  | 43    | 14.4224 | 3.26  |
| chr2L | 18695289 | 18695782 | CG10338  | 104   | 14.4224 | 3.26  |
| chr2L | 18708087 | 18708696 | Faf2     | 243   | 24.7008 | 4.39  |
| chr2L | 18728598 | 18729088 | CG10348  | 2560  | 68.7037 | 9.21  |
| chr2L | 18731731 | 18731997 | CG10348  | 333   | 5.94722 | 2.32  |
| chr2L | 18732317 | 18733370 | CR44768  | 700   | 97.151  | 9.94  |
| chr2L | 18732317 | 18733370 | CG10348  | 639   | 97.151  | 9.94  |
| chr2L | 18735556 | 18736113 | CR44769  | 202   | 27.8114 | 5.52  |
| chr2L | 18737296 | 18737583 | CR44769  | 1710  | 10.8049 | 3.26  |
| chr2L | 18748995 | 18749535 | CG15167  | 8874  | 72.9341 | 8.05  |
| chr2L | 18753337 | 18753875 | CG15167  | 13285 | 102.986 | 11.82 |
| chr2L | 18782829 | 18783794 | ham      | 962   | 31.3926 | 6.24  |
| chr2L | 18795748 | 18796931 | CR44904  | 77    | 316.742 | 36.86 |
| chr2L | 18809519 | 18809844 | CG42502  | 1235  | 7.71266 | 2.48  |
| chr2L | 18809519 | 18809844 | CG10570  | 1235  | 7.71266 | 2.48  |
| chr2L | 18809519 | 18809844 | CG42502  | 1235  | 7.71266 | 2.48  |
| chr2L | 18810790 | 18811805 | CG42502  | 221   | 65.7224 | 8.96  |
| chr2L | 18810790 | 18811805 | CG10570  | 221   | 65.7224 | 8.96  |

|       |          |          |          |      |         |       |
|-------|----------|----------|----------|------|---------|-------|
| chr2L | 18810790 | 18811805 | CG42502  | 45   | 65.7224 | 8.96  |
| chr2L | 18810790 | 18811805 | CG10570  | 45   | 65.7224 | 8.96  |
| chr2L | 18813039 | 18813398 | CG42305  | 341  | 8.98115 | 2.93  |
| chr2L | 18813039 | 18813398 | CG17325  | 341  | 8.98115 | 2.93  |
| chr2L | 18831083 | 18831618 | CG17597  | 161  | 25.837  | 4.48  |
| chr2L | 18831083 | 18831618 | ScpX     | 86   | 25.837  | 4.48  |
| chr2L | 18838695 | 18839905 | CG10600  | 125  | 41.1335 | 4.96  |
| chr2L | 18844488 | 18845577 | CG33120  | 559  | 303.162 | 26.59 |
| chr2L | 18844488 | 18845577 | CG17321  | 45   | 303.162 | 26.59 |
| chr2L | 18846801 | 18847317 | CG17321  | 1880 | 103.636 | 11.95 |
| chr2L | 18850779 | 18851186 | CG17321  | 5763 | 15.6489 | 4.05  |
| chr2L | 18881096 | 18881977 | tup      | 237  | 316.742 | 22.05 |
| chr2L | 18936044 | 18936548 | ssp3     | 7702 | 152.785 | 13.28 |
| chr2L | 18943911 | 18944530 | ssp3     | 341  | 44.7231 | 5.68  |
| chr2L | 18965948 | 18966916 | Nak      | 1976 | 26.6638 | 4.46  |
| chr2L | 18968454 | 18968780 | Nak      | 190  | 10.8708 | 2.91  |
| chr2L | 18973911 | 18974409 | CG10639  | 15   | 68.7592 | 7.58  |
| chr2L | 18985485 | 18986262 | Swip-1   | 1686 | 11.7131 | 3.19  |
| chr2L | 18987017 | 18987390 | Swip-1   | 53   | 24.766  | 4.16  |
| chr2L | 19008979 | 19009528 | RpL30    | 35   | 23.8466 | 4.11  |
| chr2L | 19011893 | 19013272 | CR45292  | 950  | 25.7809 | 5.50  |
| chr2L | 19014925 | 19015446 | CR45292  | 3310 | 10.3226 | 3.48  |
| chr2L | 19021337 | 19021890 | CG15172  | 690  | 17.4341 | 4.57  |
| chr2L | 19023946 | 19024387 | CR43700  | 240  | 13.756  | 3.80  |
| chr2L | 19024724 | 19025273 | CR43700  | 427  | 29.7189 | 5.86  |
| chr2L | 19027078 | 19027994 | Sidpn    | 75   | 31.2105 | 5.83  |
| chr2L | 19045254 | 19045722 | Acn      | 20   | 16.1194 | 3.56  |
| chr2L | 19054099 | 19054774 | CG10492  | 344  | 63.743  | 7.14  |
| chr2L | 19083274 | 19084003 | Lim3     | 154  | 28.5332 | 5.28  |
| chr2L | 19108581 | 19108871 | CR44905  | 32   | 14.7    | 4.17  |
| chr2L | 19119998 | 19121150 | Ddc      | 7    | 155.368 | 13.56 |
| chr2L | 19133523 | 19134489 | brat     | 294  | 12.4855 | 3.26  |
| chr2L | 19134842 | 19135630 | l(2)37Cg | 177  | 83.295  | 8.80  |
| chr2L | 19157909 | 19159293 | brat     | 134  | 316.742 | 21.07 |
| chr2L | 19161371 | 19161832 | CR44977  | 2350 | 22.2417 | 4.57  |
| chr2L | 19164708 | 19166384 | brat     | 555  | 148.859 | 13.45 |
| chr2L | 19190141 | 19190618 | drl      | 50   | 62.6653 | 6.50  |
| chr2L | 19361905 | 19363407 | dnt      | 248  | 316.742 | 19.09 |
| chr2L | 19389632 | 19390269 | CG17549  | 94   | 113.656 | 10.57 |
| chr2L | 19397902 | 19399347 | CG17544  | 523  | 316.742 | 32.78 |
| chr2L | 19413863 | 19414752 | Pax      | 379  | 109.191 | 10.96 |
| chr2L | 19416180 | 19416764 | Pax      | 13   | 26.3157 | 4.51  |
| chr2L | 19422361 | 19422873 | Pax      | 897  | 59.9528 | 7.62  |
| chr2L | 19423214 | 19424314 | Pax      | 49   | 316.742 | 38.79 |
| chr2L | 19423214 | 19424314 | CG16771  | 448  | 316.742 | 38.79 |
| chr2L | 19423214 | 19424314 | CG13085  | 448  | 316.742 | 38.79 |
| chr2L | 19425076 | 19425507 | CG13085  | 1013 | 35.8682 | 6.11  |
| chr2L | 19425076 | 19425507 | CG16771  | 1013 | 35.8682 | 6.11  |
| chr2L | 19426134 | 19426832 | CG13085  | 310  | 128.909 | 9.76  |
| chr2L | 19426134 | 19426832 | CG16771  | 152  | 128.909 | 9.76  |
| chr2L | 19426134 | 19426832 | Pax      | 11   | 128.909 | 9.76  |
| chr2L | 19433627 | 19433896 | Rab9     | 1178 | 9.90151 | 2.67  |
| chr2L | 19437859 | 19438628 | CG10237  | 523  | 13.2303 | 3.13  |
| chr2L | 19440731 | 19441579 | CG10237  | 28   | 14.7065 | 3.48  |
| chr2L | 19441962 | 19442416 | RanGAP   | 156  | 9.8176  | 2.99  |
| chr2L | 19444686 | 19445114 | Hs2st    | 270  | 10.3923 | 2.82  |
| chr2L | 19444686 | 19445114 | RanGAP   | 27   | 10.3923 | 2.82  |
| chr2L | 19454077 | 19455117 | CG10026  | 87   | 82.8306 | 8.81  |
| chr2L | 19463788 | 19464418 | tj       | 257  | 71.5856 | 9.55  |
| chr2L | 19479545 | 19480047 | CG10195  | 4883 | 31.4312 | 4.96  |
| chr2L | 19508299 | 19508809 | CG10188  | 122  | 16.4803 | 3.72  |
| chr2L | 19518638 | 19519108 | CG10132  | 56   | 47.2097 | 6.52  |
| chr2L | 19519537 | 19520035 | CG10132  | 893  | 106.414 | 10.33 |
| chr2L | 19528009 | 19528949 | CG10165  | 8    | 230.768 | 16.46 |
| chr2L | 19542459 | 19542847 | ref(2)P  | 189  | 21.4591 | 3.95  |
| chr2L | 19548113 | 19548713 | Tep4     | 84   | 228.289 | 16.34 |
| chr2L | 19549385 | 19549937 | Tep4     | 32   | 45.136  | 6.24  |
| chr2L | 19570937 | 19573362 | spi      | 644  | 316.742 | 30.94 |
| chr2L | 19574772 | 19577292 | spi      | 587  | 316.742 | 27.22 |
| chr2L | 19587182 | 19587570 | Lar      | 120  | 18.4366 | 4.00  |
| chr2L | 19590620 | 19591066 | Lar      | 3597 | 38.4774 | 6.64  |
| chr2L | 19605329 | 19605895 | CR44978  | 173  | 63.4793 | 7.54  |
| chr2L | 19606234 | 19606656 | CG46244  | 145  | 45.1666 | 6.71  |
| chr2L | 19606234 | 19606656 | Lar      | 145  | 45.1666 | 6.71  |
| chr2L | 19735613 | 19736100 | CG10462  | 108  | 33.3953 | 4.79  |

|       |          |          |                     |       |         |       |
|-------|----------|----------|---------------------|-------|---------|-------|
| chr2L | 19735613 | 19736100 | Nf-YB               | 215   | 33.3953 | 4.79  |
| chr2L | 19756066 | 19757064 | CG10631             | 10    | 37.9558 | 5.10  |
| chr2L | 19764572 | 19764844 | fbp                 | 568   | 15.7254 | 3.83  |
| chr2L | 19791103 | 19791866 | CdGAPr              | 89    | 9.34759 | 2.74  |
| chr2L | 19809587 | 19809965 | snRNA:U4:38AB       | 945   | 40.6205 | 5.98  |
| chr2L | 19819836 | 19820394 | snRNA:U5:38ABb      | 3654  | 64.7608 | 8.67  |
| chr2L | 19865806 | 19866178 | sick                | 205   | 18.8892 | 3.55  |
| chr2L | 19895167 | 19895572 | sick                | 590   | 25.9722 | 5.63  |
| chr2L | 19895952 | 19896279 | sick                | 62    | 11.3602 | 3.29  |
| chr2L | 19917066 | 19917388 | sick                | 944   | 25.1028 | 4.88  |
| chr2L | 19917939 | 19918245 | sick                | 34    | 23.9447 | 4.72  |
| chr2L | 19935034 | 19935600 | sick                | 7     | 91.9537 | 9.89  |
| chr2L | 19948945 | 19949222 | COX4                | 9578  | 11.3342 | 3.56  |
| chr2L | 19962316 | 19962865 | CG13965             | 266   | 47.6234 | 6.44  |
| chr2L | 19962316 | 19962865 | CG16772             | 60    | 47.6234 | 6.44  |
| chr2L | 19963997 | 19964370 | CG10680             | 37    | 17.5331 | 3.98  |
| chr2L | 19963997 | 19964370 | CR45701             | 138   | 17.5331 | 3.98  |
| chr2L | 20066428 | 20066861 | bwa                 | 351   | 10.5121 | 2.98  |
| chr2L | 20075014 | 20075778 | pr                  | 353   | 11.1002 | 3.19  |
| chr2L | 20075014 | 20075778 | neb                 | 651   | 11.1002 | 3.19  |
| chr2L | 20080716 | 20081043 | fok                 | 677   | 13.9129 | 3.46  |
| chr2L | 20082465 | 20082776 | fok                 | 2394  | 11.7751 | 3.24  |
| chr2L | 20084720 | 20085698 | fok                 | 11    | 128.133 | 9.35  |
| chr2L | 20086280 | 20086579 | fok                 | 1335  | 19.8529 | 3.78  |
| chr2L | 20120855 | 20121308 | CG10651             | 13856 | 120.084 | 9.16  |
| chr2L | 20242804 | 20243092 | CR40341             | 5052  | 30.0859 | 6.03  |
| chr2L | 20290758 | 20291024 | CG12617             | 3795  | 13.4655 | 3.67  |
| chr2L | 20310673 | 20311464 | spir                | 13    | 158.285 | 11.43 |
| chr2L | 20321218 | 20321818 | CR43606             | 3951  | 50.9105 | 7.93  |
| chr2L | 20341609 | 20342134 | spir                | 6     | 40.4196 | 5.24  |
| chr2L | 20350308 | 20350611 | RtGEF               | 3     | 19.3445 | 4.07  |
| chr2L | 20382139 | 20382595 | CG16798             | 45    | 80.7893 | 8.35  |
| chr2L | 20416966 | 20418024 | Arpc2               | 384   | 307.857 | 19.12 |
| chr2L | 20425970 | 20426381 | CG31688             | 36    | 22.8586 | 4.91  |
| chr2L | 20428429 | 20429422 | CG31688             | 72    | 43.4236 | 5.34  |
| chr2L | 20561273 | 20562404 | CR45347             | 61    | 41.1492 | 7.45  |
| chr2L | 20561273 | 20562404 | mir-4973            | 112   | 41.1492 | 7.45  |
| chr2L | 20638204 | 20638722 | CG31680             | 1692  | 60.0564 | 8.19  |
| chr2L | 20671422 | 20671734 | CG31678             | 3482  | 18.1774 | 4.30  |
| chr2L | 20700878 | 20701152 | CR44187             | 9020  | 19.3733 | 4.43  |
| chr2L | 20705812 | 20706440 | CR44187             | 4008  | 133.565 | 14.69 |
| chr2L | 20714332 | 20715109 | Hr38                | 104   | 316.742 | 34.35 |
| chr2L | 20715833 | 20716642 | Hr38                | 1577  | 149.878 | 13.98 |
| chr2L | 20719950 | 20720600 | CR45306             | 1734  | 41.5796 | 6.22  |
| chr2L | 20758091 | 20759060 | dia                 | 661   | 55.5616 | 6.50  |
| chr2L | 20759454 | 20759786 | dia                 | 653   | 16.9601 | 3.59  |
| chr2L | 20770302 | 20770820 | cad                 | 168   | 145.293 | 12.48 |
| chr2L | 20783123 | 20783466 | Pomp                | 4380  | 38.0233 | 6.20  |
| chr2L | 20793470 | 20794419 | vari                | 64    | 316.742 | 23.89 |
| chr2L | 20797561 | 20797962 | CG9328              | 32    | 42.1713 | 4.48  |
| chr2L | 20803700 | 20804030 | CG9328              | 5990  | 8.66683 | 2.98  |
| chr2L | 20808050 | 20809353 | CG9328              | 843   | 29.5898 | 5.07  |
| chr2L | 20821469 | 20822125 | CheB38c             | 882   | 288.135 | 19.15 |
| chr2L | 20822537 | 20823186 | CG9331              | 51    | 148.882 | 12.80 |
| chr2L | 20823516 | 20825786 | CG9331              | 5     | 209.133 | 18.37 |
| chr2L | 20829391 | 20830183 | CG31673             | 20    | 97.036  | 11.20 |
| chr2L | 20831089 | 20831570 | CG31674             | 35    | 116.644 | 10.37 |
| chr2L | 20840401 | 20840928 | CG31676             | 56    | 43.8783 | 6.25  |
| chr2L | 20858990 | 20859402 | CG9336              | 20    | 35.3581 | 5.25  |
| chr2L | 20864578 | 20865161 | CG9338              | 358   | 23.7283 | 4.44  |
| chr2L | 20869834 | 20870214 | CG14401             | 248   | 9.45705 | 3.08  |
| chr2L | 20877952 | 20878326 | CR44981             | 3892  | 11.3468 | 3.07  |
| chr2L | 20885729 | 20886461 | sky                 | 223   | 189.067 | 12.17 |
| chr2L | 20890135 | 20890793 | sky                 | 40    | 316.742 | 23.83 |
| chr2L | 20904443 | 20904721 | sky                 | 12808 | 12.327  | 3.27  |
| chr2L | 20917139 | 20918461 | sky                 | 29    | 78.6001 | 7.89  |
| chr2L | 20922602 | 20923133 | Mtp                 | 57    | 44.3727 | 6.19  |
| chr2L | 21051726 | 21052355 | CG42238             | 89    | 93.4442 | 9.74  |
| chr2L | 21065872 | 21066270 | CG9265              | 3887  | 17.0726 | 4.32  |
| chr2L | 21071423 | 21071700 | CG9265              | 51    | 17.9567 | 4.32  |
| chr2L | 21075107 | 21075560 | tadr                | 16    | 15.6368 | 3.71  |
| chr2L | 21096515 | 21097164 | CG34136             | 140   | 274.858 | 23.40 |
| chr2L | 21141697 | 21142443 | Dap160              | 436   | 63.9201 | 6.49  |
| chr2L | 21162858 | 21163123 | Nbr                 | 85    | 18.0307 | 3.92  |
| chr2L | 21175829 | 21176177 | caRNA:PsiU2-38.40.4 | 1113  | 9.31732 | 2.92  |

|       |          |          |                     |        |         |       |
|-------|----------|----------|---------------------|--------|---------|-------|
| chr2L | 21177283 | 21177612 | caRNA:PsiU2-38.40.4 | 220    | 14.9772 | 3.40  |
| chr2L | 21178475 | 21179691 | bur                 | 793    | 67.8798 | 8.17  |
| chr2L | 21218318 | 21218963 | CG8679              | 206    | 92.2177 | 11.15 |
| chr2L | 21219604 | 21220225 | Atg18b              | 691    | 17.6046 | 3.74  |
| chr2L | 21221286 | 21222290 | CG8677              | 662    | 316.742 | 26.17 |
| chr2L | 21237072 | 21238333 | Hr39                | 606    | 316.742 | 29.09 |
| chr2L | 21250467 | 21251163 | l(2)k14505          | 10306  | 34.3409 | 5.45  |
| chr2L | 21309166 | 21310286 | Mondo               | 54     | 107.438 | 9.61  |
| chr2L | 21310811 | 21311183 | crc                 | 129    | 17.2033 | 3.43  |
| chr2L | 21312924 | 21313524 | crc                 | 1082   | 302.842 | 19.25 |
| chr2L | 21313795 | 21314756 | crc                 | 32     | 316.742 | 33.63 |
| chr2L | 21344384 | 21345209 | Tsp39D              | 272    | 41.9156 | 5.56  |
| chr2L | 21379973 | 21380253 | nrv3                | 10     | 18.394  | 4.28  |
| chr2L | 21381116 | 21381652 | nrv3                | 1367   | 18.7317 | 4.29  |
| chr2L | 21572774 | 21573094 | Lamp1               | 469    | 50.6563 | 7.47  |
| chr2L | 21618615 | 21619185 | CG2201              | 59     | 90.0037 | 9.67  |
| chr2L | 21623425 | 21623913 | CG2201              | 62     | 203.552 | 12.76 |
| chr2L | 21627290 | 21627566 | CR44993             | 1032   | 32.1549 | 5.02  |
| chr2L | 21628419 | 21630153 | CR44993             | 1468   | 184.001 | 12.22 |
| chr2L | 21628419 | 21630153 | Df31                | 3      | 184.001 | 12.22 |
| chr2L | 21632385 | 21633403 | Ac3                 | 483    | 27.5095 | 4.76  |
| chr2L | 21639633 | 21639965 | Ac3                 | 7183   | 27.8653 | 5.71  |
| chr2L | 21676457 | 21677009 | CG2225              | 516    | 150.937 | 12.11 |
| chr2L | 21681693 | 21682222 | EF2                 | 34     | 28.4374 | 4.64  |
| chr2L | 21683163 | 21684063 | nolo                | 273    | 34.3257 | 4.69  |
| chr2L | 21753505 | 21754213 | step                | 110    | 307.442 | 20.22 |
| chr2L | 21757183 | 21757559 | step                | 105    | 12.5392 | 3.15  |
| chr2L | 21794550 | 21795628 | CG31612             | 665    | 316.742 | 25.61 |
| chr2L | 21819448 | 21819743 | CR44786             | 81     | 18.301  | 4.40  |
| chr2L | 21827944 | 21829142 | tsh                 | 63     | 316.742 | 27.56 |
| chr2L | 21830336 | 21831588 | tsh                 | 2194   | 79.8711 | 9.25  |
| chr2L | 21863651 | 21863960 | CR44918             | 2482   | 15.2491 | 3.96  |
| chr2L | 21866406 | 21866808 | CR44918             | 297    | 55.2324 | 8.18  |
| chr2L | 21899045 | 21899912 | CG11629             | 1182   | 316.742 | 42.63 |
| chr2L | 22018531 | 22019559 | tio                 | 64     | 316.742 | 54.26 |
| chr2L | 22018531 | 22019559 | CR33987             | 64     | 316.742 | 54.26 |
| chr2L | 22018531 | 22019559 | tio                 | 178    | 316.742 | 54.26 |
| chr2L | 22024046 | 22024998 | tio                 | 5163   | 316.742 | 26.53 |
| chr2L | 22108498 | 22109130 | CG6675              | 8      | 24.1886 | 4.52  |
| chr2L | 22117460 | 22118136 | CG3651              | 3489   | 118.915 | 12.36 |
| chr2L | 22121898 | 22122182 | CG3651              | 195    | 9.18791 | 2.81  |
| chr2L | 22133979 | 22134637 | CG42748             | 58     | 316.742 | 30.99 |
| chr2L | 22142632 | 22142942 | CG42748             | 2695   | 18.4702 | 4.44  |
| chr2L | 22143942 | 22144459 | CG42748             | 4108   | 194.67  | 13.47 |
| chr2L | 22145534 | 22145941 | CG42748             | 5614   | 35.8523 | 5.45  |
| chr2L | 22148717 | 22149096 | CG34137             | 2821   | 106.406 | 9.63  |
| chr2L | 22419904 | 22420179 | CG17018             | 65662  | 22.5747 | 5.26  |
| chr2L | 22549775 | 22550348 | CG17493             | 36     | 146.268 | 14.79 |
| chr2L | 22756176 | 22756643 | CG40006             | 68     | 167.391 | 12.12 |
| chr2R | 601773   | 602097   | CG45781             | 169651 | 87.2863 | 11.92 |
| chr2R | 4270533  | 4271053  | IntS3               | 27832  | 49.9213 | 6.45  |
| chr2R | 5413446  | 5413842  | laccase2            | 106    | 90.4687 | 8.87  |
| chr2R | 5495689  | 5496760  | CG30440             | 32     | 26.9524 | 4.97  |
| chr2R | 5495689  | 5496760  | CG30438             | 844    | 26.9524 | 4.97  |
| chr2R | 5608615  | 5608882  | CG17508             | 113    | 27.1281 | 4.70  |
| chr2R | 5726702  | 5727309  | ap                  | 206    | 316.742 | 22.34 |
| chr2R | 5772969  | 5773421  | scaRNA:PsiU2-35.45  | 8016   | 165.667 | 16.06 |
| chr2R | 5782085  | 5783091  | ZnT41F              | 472    | 276.945 | 18.11 |
| chr2R | 5804293  | 5804843  | dpr12               | 161    | 67.1236 | 7.79  |
| chr2R | 5981909  | 5982695  | Src42A              | 366    | 85.0153 | 9.24  |
| chr2R | 5992498  | 5993243  | Src42A              | 178    | 316.742 | 21.85 |
| chr2R | 6022987  | 6023443  | Strica              | 40     | 52.5089 | 8.39  |
| chr2R | 6035267  | 6036564  | SCAP                | 361    | 24.1333 | 4.35  |
| chr2R | 6040197  | 6040530  | CG14591             | 38     | 23.2788 | 4.31  |
| chr2R | 6102136  | 6103300  | Ars2                | 16962  | 316.742 | 27.25 |
| chr2R | 6103810  | 6104492  | Ars2                | 18569  | 48.3168 | 7.12  |
| chr2R | 6120307  | 6121026  | EcR                 | 11266  | 316.742 | 17.98 |
| chr2R | 6125055  | 6125423  | EcR                 | 6596   | 20.9884 | 4.16  |
| chr2R | 6131640  | 6132467  | EcR                 | 179    | 316.742 | 33.23 |
| chr2R | 6132734  | 6134865  | EcR                 | 1246   | 316.742 | 29.49 |
| chr2R | 6142446  | 6143007  | CG14589             | 5496   | 51.8744 | 6.17  |
| chr2R | 6145615  | 6146292  | CG14589             | 8739   | 18.1656 | 4.11  |
| chr2R | 6151076  | 6151517  | EcR                 | 5864   | 28.441  | 4.49  |
| chr2R | 6156189  | 6157464  | EcR                 | 435    | 316.742 | 20.41 |
| chr2R | 6157951  | 6160083  | CR43904             | 480    | 316.742 | 20.09 |

|       |         |         |         |       |         |       |
|-------|---------|---------|---------|-------|---------|-------|
| chr2R | 6168258 | 6169290 | EcR     | 3     | 101.246 | 9.83  |
| chr2R | 6173586 | 6173913 | Cyp6w1  | 50    | 26.4355 | 4.81  |
| chr2R | 6195838 | 6196610 | Ptr     | 0     | 209.828 | 19.12 |
| chr2R | 6214565 | 6214836 | bin3    | 94    | 15.2728 | 3.30  |
| chr2R | 6220180 | 6222241 | bin3    | 577   | 316.742 | 18.83 |
| chr2R | 6235319 | 6236430 | Pld     | 5895  | 316.742 | 34.21 |
| chr2R | 6241794 | 6242519 | Pld     | 48    | 316.742 | 22.94 |
| chr2R | 6245275 | 6245564 | Pld     | 104   | 17.7908 | 4.22  |
| chr2R | 6500450 | 6502303 | CR46075 | 9     | 254.816 | 14.89 |
| chr2R | 6500450 | 6502303 | jing    | 224   | 254.816 | 14.89 |
| chr2R | 6505496 | 6505948 | jing    | 3793  | 11.3812 | 3.20  |
| chr2R | 6518521 | 6519110 | CR45127 | 8509  | 153.022 | 14.01 |
| chr2R | 6519939 | 6520584 | CR45127 | 10036 | 21.2502 | 4.06  |
| chr2R | 6574697 | 6575583 | CG15233 | 25843 | 93.1871 | 9.34  |
| chr2R | 6610101 | 6611246 | jing    | 104   | 97.6167 | 11.07 |
| chr2R | 6612871 | 6613829 | jing    | 612   | 83.4579 | 8.66  |
| chr2R | 6627707 | 6628992 | CG33919 | 3799  | 316.742 | 38.54 |
| chr2R | 6629572 | 6633303 | Vha16-1 | 105   | 316.742 | 40.07 |
| chr2R | 6644901 | 6645466 | Fmo-2   | 86    | 47.2418 | 6.92  |
| chr2R | 6648443 | 6649332 | Debcl   | 109   | 217.696 | 17.17 |
| chr2R | 6661973 | 6663528 | Dpit47  | 1046  | 93.2309 | 9.26  |
| chr2R | 6661973 | 6663528 | Adf1    | 895   | 93.2309 | 9.26  |
| chr2R | 6673151 | 6673660 | Hsepi   | 26    | 19.5354 | 4.16  |
| chr2R | 6673151 | 6673660 | PGAP3   | 257   | 19.5354 | 4.16  |
| chr2R | 6696560 | 6696864 | Mob4    | 10    | 13.3609 | 3.19  |
| chr2R | 6696560 | 6696864 | Rab2    | 67    | 13.3609 | 3.19  |
| chr2R | 6715196 | 6716003 | CG3409  | 44    | 35.5974 | 5.35  |
| chr2R | 6715196 | 6716003 | CG45092 | 44    | 35.5974 | 5.35  |
| chr2R | 6741818 | 6742584 | phtf    | 22    | 10.7626 | 2.80  |
| chr2R | 6749155 | 6749677 | Eb1     | 53    | 22.3717 | 4.06  |
| chr2R | 6750002 | 6750513 | Eb1     | 766   | 22.7933 | 4.75  |
| chr2R | 6758622 | 6759129 | CG9436  | 16    | 33.0765 | 5.30  |
| chr2R | 6781416 | 6782110 | Cyp6a2  | 184   | 59.1555 | 7.93  |
| chr2R | 6798817 | 6799188 | Epac    | 29    | 34.6748 | 5.72  |
| chr2R | 6799812 | 6800140 | Epac    | 1020  | 25.6968 | 5.66  |
| chr2R | 6807681 | 6807955 | SdhB    | 252   | 12.4792 | 3.50  |
| chr2R | 6810932 | 6811320 | koi     | 36    | 24.8525 | 4.22  |
| chr2R | 6828049 | 6828600 | CG15236 | 32    | 164.714 | 17.97 |
| chr2R | 6871394 | 6873138 | coro    | 586   | 282.026 | 16.42 |
| chr2R | 6878196 | 6879031 | Spn42Da | 66    | 316.742 | 28.63 |
| chr2R | 6880752 | 6881120 | Spn42Db | 173   | 26.5566 | 5.03  |
| chr2R | 6880752 | 6881120 | Spn42Dc | 51    | 26.5566 | 5.03  |
| chr2R | 6882837 | 6883665 | Spn42Dd | 58    | 316.742 | 28.17 |
| chr2R | 6885504 | 6885894 | Spn42De | 181   | 14.7609 | 3.63  |
| chr2R | 6923112 | 6923547 | CG3358  | 88    | 48.259  | 6.33  |
| chr2R | 6970973 | 6971735 | mim     | 46    | 16.6496 | 3.38  |
| chr2R | 6970973 | 6971735 | CheB42c | 46    | 16.6496 | 3.38  |
| chr2R | 6970973 | 6971735 | mim     | 46    | 16.6496 | 3.38  |
| chr2R | 6985111 | 6985807 | CG30156 | 161   | 20.4882 | 4.12  |
| chr2R | 6985111 | 6985807 | vimar   | 161   | 20.4882 | 4.12  |
| chr2R | 6991834 | 6993130 | Tsp42Ea | 156   | 247.711 | 17.11 |
| chr2R | 6991834 | 6993130 | CG30159 | 151   | 247.711 | 17.11 |
| chr2R | 6991834 | 6993130 | Tsp42Ea | 151   | 247.711 | 17.11 |
| chr2R | 6991834 | 6993130 | CG30159 | 151   | 247.711 | 17.11 |
| chr2R | 6991834 | 6993130 | Tsp42Ea | 151   | 247.711 | 17.11 |
| chr2R | 6991834 | 6993130 | CG30159 | 88    | 247.711 | 17.11 |
| chr2R | 7012038 | 7013532 | Tsp42Ee | 114   | 82.6389 | 7.62  |
| chr2R | 7014484 | 7015123 | Tsp42Ee | 2163  | 16.7281 | 3.68  |
| chr2R | 7024793 | 7025653 | Tsp42Ef | 273   | 316.742 | 25.73 |
| chr2R | 7028632 | 7029104 | Tsp42Eg | 91    | 50.6989 | 6.87  |
| chr2R | 7031290 | 7031735 | Tsp42Eh | 2053  | 35.0921 | 5.39  |
| chr2R | 7034878 | 7035551 | Tsp42Ei | 45    | 64.161  | 8.26  |
| chr2R | 7039840 | 7040459 | Tsp42Ej | 66    | 141.426 | 13.30 |
| chr2R | 7045158 | 7046116 | Tsp42El | 28    | 92.5482 | 8.77  |
| chr2R | 7049507 | 7049942 | lbn     | 64    | 88.1761 | 10.87 |
| chr2R | 7106266 | 7106838 | esn     | 146   | 108.252 | 11.56 |
| chr2R | 7129612 | 7129945 | Cyp9b1  | 47    | 32.5306 | 5.85  |
| chr2R | 7131863 | 7132788 | Cyp9b2  | 194   | 316.742 | 23.10 |
| chr2R | 7146716 | 7147274 | Spn43Aa | 698   | 264.225 | 19.60 |
| chr2R | 7150246 | 7150981 | pk      | 76    | 316.742 | 33.06 |
| chr2R | 7153436 | 7153844 | Spn43Ab | 5     | 36.1627 | 6.08  |
| chr2R | 7155224 | 7156567 | Spn43Ad | 128   | 316.742 | 29.96 |
| chr2R | 7157956 | 7158692 | nec     | 98    | 316.742 | 28.45 |
| chr2R | 7187088 | 7187485 | pk      | 46    | 36.9617 | 5.64  |
| chr2R | 7245301 | 7246106 | Ady43A  | 119   | 138.227 | 7.39  |

|       |         |         |          |       |         |       |
|-------|---------|---------|----------|-------|---------|-------|
| chr2R | 7248553 | 7249425 | Gadd45   | 77    | 316.742 | 40.42 |
| chr2R | 7252144 | 7252421 | CR45280  | 2325  | 8.66213 | 2.77  |
| chr2R | 7252974 | 7253332 | CR45280  | 1484  | 16.1583 | 4.11  |
| chr2R | 7253886 | 7254340 | CR45280  | 475   | 61.3346 | 8.04  |
| chr2R | 7300721 | 7301025 | CG12164  | 10539 | 55.0748 | 7.56  |
| chr2R | 7352179 | 7353062 | CR44071  | 9267  | 316.742 | 27.65 |
| chr2R | 7371285 | 7371539 | Dscam1   | 10442 | 23.2184 | 5.16  |
| chr2R | 7373866 | 7374250 | Dscam1   | 7868  | 20.2224 | 4.55  |
| chr2R | 7381387 | 7382236 | Dscam1   | 60    | 316.742 | 33.01 |
| chr2R | 7407210 | 7407928 | Eaf      | 329   | 10.1626 | 2.94  |
| chr2R | 7418381 | 7419623 | so       | 671   | 244.226 | 19.49 |
| chr2R | 7427336 | 7427732 | CG11145  | 967   | 19.2306 | 4.41  |
| chr2R | 7429141 | 7429783 | CR44203  | 665   | 20.5555 | 4.78  |
| chr2R | 7457357 | 7459229 | Inos     | 74    | 316.742 | 28.88 |
| chr2R | 7464785 | 7465278 | CG11127  | 1592  | 25.6008 | 4.91  |
| chr2R | 7470889 | 7471587 | Aldh-III | 2885  | 13.4928 | 3.51  |
| chr2R | 7473539 | 7474196 | Aldh-III | 230   | 29.3219 | 4.96  |
| chr2R | 7474454 | 7474747 | Aldh-III | 54    | 22.1667 | 4.12  |
| chr2R | 7477587 | 7477908 | Aldh-III | 603   | 12.7744 | 3.23  |
| chr2R | 7478642 | 7479145 | Aldh-III | 1643  | 15.5592 | 3.55  |
| chr2R | 7487883 | 7489270 | wech     | 139   | 311.451 | 21.04 |
| chr2R | 7489579 | 7490867 | wech     | 734   | 256.155 | 16.02 |
| chr2R | 7491999 | 7493347 | Coop     | 108   | 248.968 | 19.69 |
| chr2R | 7491999 | 7493347 | CR43723  | 57    | 248.968 | 19.69 |
| chr2R | 7491999 | 7493347 | Coop     | 169   | 248.968 | 19.69 |
| chr2R | 7500035 | 7500425 | dpa      | 24    | 9.15002 | 2.50  |
| chr2R | 7500035 | 7500425 | didum    | 25    | 9.15002 | 2.50  |
| chr2R | 7528978 | 7529777 | Drat     | 43    | 60.1817 | 6.71  |
| chr2R | 7530635 | 7531250 | Drat     | 99    | 214.11  | 13.78 |
| chr2R | 7533327 | 7533968 | CR44209  | 143   | 25.3252 | 4.16  |
| chr2R | 7533327 | 7533968 | Cyt-b5   | 135   | 25.3252 | 4.16  |
| chr2R | 7543998 | 7544510 | Corin    | 815   | 54.6975 | 8.29  |
| chr2R | 7544932 | 7545555 | Corin    | 61    | 60.6501 | 8.62  |
| chr2R | 7566661 | 7567014 | boca     | 112   | 27.0657 | 4.53  |
| chr2R | 7566661 | 7567014 | Vps13    | 42    | 27.0657 | 4.53  |
| chr2R | 7586844 | 7587397 | blow     | 56    | 105.379 | 11.77 |
| chr2R | 7590042 | 7590367 | CG1360   | 97    | 13.3    | 3.14  |
| chr2R | 7590042 | 7590367 | scra     | 5     | 13.3    | 3.14  |
| chr2R | 7620586 | 7621070 | CG1358   | 57    | 27.0355 | 5.13  |
| chr2R | 7622941 | 7623480 | CG43340  | 73    | 90.3671 | 10.92 |
| chr2R | 7632352 | 7633416 | CG43341  | 137   | 316.742 | 42.49 |
| chr2R | 7636158 | 7637127 | CG43340  | 32    | 39.641  | 6.18  |
| chr2R | 7663553 | 7664025 | CG2065   | 53    | 63.6563 | 9.11  |
| chr2R | 7665597 | 7666063 | CG2064   | 3     | 160.93  | 11.91 |
| chr2R | 7692740 | 7693211 | LRR      | 2459  | 28.0323 | 5.66  |
| chr2R | 7697785 | 7698170 | LRR      | 854   | 26.09   | 4.94  |
| chr2R | 7698808 | 7699722 | LRR      | 576   | 79.6269 | 7.56  |
| chr2R | 7698808 | 7699722 | CG30493  | 226   | 79.6269 | 7.56  |
| chr2R | 7698808 | 7699722 | CG30496  | 21    | 79.6269 | 7.56  |
| chr2R | 7709644 | 7710135 | CG1941   | 21    | 75.976  | 8.11  |
| chr2R | 7722345 | 7723498 | CG18812  | 96    | 316.742 | 32.30 |
| chr2R | 7730358 | 7730747 | CG18812  | 3076  | 13.681  | 3.61  |
| chr2R | 7731168 | 7731697 | CG18812  | 3939  | 32      | 4.69  |
| chr2R | 7735013 | 7735712 | CG18812  | 130   | 49.182  | 6.85  |
| chr2R | 7742923 | 7743292 | CG45093  | 881   | 8.73854 | 2.95  |
| chr2R | 7742923 | 7743292 | CG30497  | 881   | 8.73854 | 2.95  |
| chr2R | 7745051 | 7745868 | CG30497  | 88    | 316.742 | 27.53 |
| chr2R | 7745051 | 7745868 | CG45093  | 88    | 316.742 | 27.53 |
| chr2R | 7758521 | 7759318 | CG45093  | 6     | 88.798  | 8.56  |
| chr2R | 7758521 | 7759318 | CG30497  | 6     | 88.798  | 8.56  |
| chr2R | 7766323 | 7767934 | CG45093  | 8778  | 143.846 | 14.35 |
| chr2R | 7766323 | 7767934 | CG30497  | 8778  | 143.846 | 14.35 |
| chr2R | 7779348 | 7780107 | CG30497  | 3005  | 238.253 | 18.67 |
| chr2R | 7779348 | 7780107 | CG45093  | 3005  | 238.253 | 18.67 |
| chr2R | 7782389 | 7783358 | CG30497  | 570   | 277.622 | 19.64 |
| chr2R | 7782389 | 7783358 | CG45093  | 570   | 277.622 | 19.64 |
| chr2R | 7782389 | 7783358 | CR45108  | 126   | 277.622 | 19.64 |
| chr2R | 7785985 | 7786540 | CanB2    | 297   | 35.6154 | 5.23  |
| chr2R | 7785985 | 7786540 | mir-4980 | 15    | 35.6154 | 5.23  |
| chr2R | 7792982 | 7793369 | Gapdh1   | 24    | 27.8127 | 5.07  |
| chr2R | 7805241 | 7806543 | Nop17l   | 74    | 240.193 | 16.75 |
| chr2R | 7805241 | 7806543 | sax      | 843   | 240.193 | 16.75 |
| chr2R | 7812322 | 7813129 | CG1882   | 97    | 97.3296 | 9.19  |
| chr2R | 7885791 | 7886454 | Dgk      | 119   | 289.18  | 21.10 |
| chr2R | 7888106 | 7888469 | CG30377  | 1736  | 42.8731 | 6.71  |

|       |         |         |              |       |         |       |
|-------|---------|---------|--------------|-------|---------|-------|
| chr2R | 7916774 | 7917705 | Cul1         | 184   | 39.818  | 5.92  |
| chr2R | 7955478 | 7955971 | CG14764      | 64    | 12.7948 | 3.32  |
| chr2R | 7959344 | 7960049 | CG2915       | 260   | 316.742 | 27.19 |
| chr2R | 7983698 | 7984573 | ACC          | 98    | 316.742 | 40.61 |
| chr2R | 7989032 | 7989934 | ACC          | 461   | 32.2991 | 4.99  |
| chr2R | 7989032 | 7989934 | Nup44A       | 605   | 32.2991 | 4.99  |
| chr2R | 7991896 | 7992168 | ACC          | 167   | 15.2212 | 3.89  |
| chr2R | 8001951 | 8002749 | CG11191      | 58    | 28.9637 | 5.69  |
| chr2R | 8012987 | 8013923 | CG14762      | 12    | 32.8839 | 5.09  |
| chr2R | 8018657 | 8019420 | CR45267      | 192   | 245.146 | 15.19 |
| chr2R | 8024363 | 8024760 | CR43724      | 4909  | 17.2529 | 3.98  |
| chr2R | 8029360 | 8029736 | CR43724      | 94    | 29.7942 | 5.31  |
| chr2R | 8030635 | 8031702 | Optix        | 258   | 89.7191 | 10.02 |
| chr2R | 8051287 | 8051545 | CG12769      | 7148  | 13.7162 | 3.11  |
| chr2R | 8060293 | 8062042 | CG12769      | 2656  | 316.742 | 39.53 |
| chr2R | 8062358 | 8063370 | CG12769      | 2963  | 151.056 | 14.05 |
| chr2R | 8063805 | 8064439 | CG12769      | 1479  | 61.0223 | 7.80  |
| chr2R | 8064743 | 8065880 | CG12769      | 9     | 316.742 | 22.48 |
| chr2R | 8067906 | 8069440 | lig          | 383   | 107.363 | 9.45  |
| chr2R | 8082774 | 8083653 | sut1         | 35    | 136.542 | 12.10 |
| chr2R | 8082774 | 8083653 | slv          | 65    | 136.542 | 12.10 |
| chr2R | 8121483 | 8121840 | Asap         | 1340  | 40.2793 | 6.73  |
| chr2R | 8122707 | 8123090 | Asap         | 68    | 10.8256 | 3.22  |
| chr2R | 8122707 | 8123090 | Nup50        | 102   | 10.8256 | 3.22  |
| chr2R | 8131276 | 8132252 | Pbp49        | 563   | 185.257 | 11.69 |
| chr2R | 8131276 | 8132252 | CG42516      | 563   | 185.257 | 11.69 |
| chr2R | 8131276 | 8132252 | Pbp49        | 563   | 185.257 | 11.69 |
| chr2R | 8131276 | 8132252 | Pabp2        | 456   | 185.257 | 11.69 |
| chr2R | 8143079 | 8143590 | Lpin         | 831   | 76.8981 | 9.04  |
| chr2R | 8145392 | 8146599 | Lpin         | 66    | 316.742 | 24.39 |
| chr2R | 8150731 | 8151075 | kermit       | 1417  | 9.04564 | 2.90  |
| chr2R | 8151782 | 8152494 | kermit       | 2769  | 268.687 | 18.25 |
| chr2R | 8156271 | 8156746 | Lpin         | 176   | 31.0557 | 5.34  |
| chr2R | 8156271 | 8156746 | kermit       | 176   | 31.0557 | 5.34  |
| chr2R | 8173975 | 8175189 | LRP1         | 32    | 68.1589 | 6.05  |
| chr2R | 8236775 | 8238268 | pnut         | 80    | 264.55  | 15.98 |
| chr2R | 8272209 | 8273221 | CG30371      | 3523  | 316.742 | 39.44 |
| chr2R | 8288150 | 8288466 | mir-280      | 9764  | 14.3778 | 3.88  |
| chr2R | 8288785 | 8289085 | mir-280      | 9187  | 14.8847 | 3.94  |
| chr2R | 8317433 | 8318167 | CR44450      | 6284  | 85.4805 | 10.97 |
| chr2R | 8326691 | 8327769 | pdm3         | 232   | 316.742 | 34.99 |
| chr2R | 8329018 | 8329363 | pdm3         | 1658  | 16.9067 | 3.91  |
| chr2R | 8335950 | 8336430 | pdm3         | 8703  | 18.8732 | 3.93  |
| chr2R | 8336736 | 8337340 | pdm3         | 9555  | 187.148 | 14.32 |
| chr2R | 8340431 | 8340805 | pdm3         | 13172 | 12.1994 | 3.43  |
| chr2R | 8396605 | 8397160 | pdm3         | 9449  | 36.1316 | 5.20  |
| chr2R | 8411085 | 8411492 | CG2121       | 66    | 24.31   | 4.93  |
| chr2R | 8444515 | 8444933 | Cyp4e2       | 8     | 25.3299 | 5.00  |
| chr2R | 8447260 | 8447680 | Cyp4e1       | 18    | 44.8909 | 7.20  |
| chr2R | 8462223 | 8462920 | Mal-A5       | 293   | 154.96  | 14.45 |
| chr2R | 8516518 | 8516873 | mtt          | 15626 | 10.3226 | 3.48  |
| chr2R | 8570262 | 8570757 | Cyp6a13      | 2     | 105.363 | 13.45 |
| chr2R | 8608107 | 8608613 | CG8642       | 5827  | 40.392  | 6.76  |
| chr2R | 8614510 | 8615328 | Cir1         | 59    | 22.1903 | 3.90  |
| chr2R | 8632490 | 8632818 | CG8635       | 707   | 24.2061 | 5.14  |
| chr2R | 8647322 | 8648342 | ptc          | 1851  | 316.742 | 34.26 |
| chr2R | 8649177 | 8650495 | ptc          | 133   | 316.742 | 42.43 |
| chr2R | 8665735 | 8666975 | Acsl         | 77    | 316.742 | 32.92 |
| chr2R | 8667397 | 8668152 | Acsl         | 1537  | 316.742 | 32.54 |
| chr2R | 8668576 | 8669634 | Acsl         | 1846  | 316.742 | 38.76 |
| chr2R | 8670008 | 8672312 | Acsl         | 147   | 272.124 | 18.97 |
| chr2R | 8695577 | 8696841 | CG8586       | 145   | 316.742 | 21.12 |
| chr2R | 8695577 | 8696841 | CG8738       | 37    | 316.742 | 21.12 |
| chr2R | 8723650 | 8724821 | CG14767      | 696   | 310.761 | 18.41 |
| chr2R | 8723650 | 8724821 | gcl          | 278   | 310.761 | 18.41 |
| chr2R | 8725428 | 8725722 | snoRNA:gcl-a | 649   | 25.1762 | 4.06  |
| chr2R | 8733175 | 8733564 | stmA         | 37    | 13.8792 | 3.28  |
| chr2R | 8735308 | 8736541 | CG8740       | 101   | 316.742 | 30.55 |
| chr2R | 8746516 | 8747110 | CG8740       | 2076  | 52.8269 | 7.80  |
| chr2R | 8774199 | 8774464 | CR44278      | 5547  | 15.6489 | 4.05  |
| chr2R | 8798044 | 8798741 | sns          | 93    | 302.52  | 17.35 |
| chr2R | 8859502 | 8859772 | RyR          | 748   | 16.0637 | 3.90  |
| chr2R | 8860195 | 8860467 | RyR          | 28    | 9.43558 | 3.13  |
| chr2R | 8862409 | 8862805 | RyR          | 156   | 40.9662 | 6.60  |
| chr2R | 8891164 | 8891471 | CG8272       | 46    | 16.2393 | 3.78  |



|       |         |         |                    |       |         |       |
|-------|---------|---------|--------------------|-------|---------|-------|
| chr2R | 8901270 | 8901802 | MrgBP              | 22    | 16.7281 | 3.68  |
| chr2R | 8901270 | 8901802 | Ggamma1            | 6     | 16.7281 | 3.68  |
| chr2R | 8906788 | 8907056 | CG8258             | 7     | 10.8746 | 3.09  |
| chr2R | 8913471 | 8914047 | Pgi                | 115   | 27.8929 | 4.66  |
| chr2R | 8928032 | 8928415 | CG8235             | 47    | 8.49472 | 2.47  |
| chr2R | 8928032 | 8928415 | PAN2               | 16    | 8.49472 | 2.47  |
| chr2R | 8943543 | 8943852 | CR44274            | 224   | 7.95929 | 2.50  |
| chr2R | 8944566 | 8944882 | CR44274            | 1243  | 12.7505 | 3.36  |
| chr2R | 8947102 | 8947464 | CG8230             | 62    | 11.239  | 3.01  |
| chr2R | 8949020 | 8949564 | CG8229             | 1791  | 24.6197 | 4.66  |
| chr2R | 8949020 | 8949564 | CG33199            | 1791  | 24.6197 | 4.66  |
| chr2R | 8949020 | 8949564 | CG8229             | 1791  | 24.6197 | 4.66  |
| chr2R | 8949020 | 8949564 | CG33199            | 1791  | 24.6197 | 4.66  |
| chr2R | 8950686 | 8951213 | CG8229             | 163   | 40.9377 | 5.21  |
| chr2R | 8950686 | 8951213 | CG33199            | 163   | 40.9377 | 5.21  |
| chr2R | 8950686 | 8951213 | CG8229             | 163   | 40.9377 | 5.21  |
| chr2R | 8950686 | 8951213 | CG33199            | 163   | 40.9377 | 5.21  |
| chr2R | 8967962 | 8968417 | CG8216             | 50    | 18.4422 | 4.66  |
| chr2R | 9039462 | 9039750 | Ance-4             | 2542  | 29.3291 | 5.09  |
| chr2R | 9059766 | 9060457 | CG13743            | 324   | 54.4517 | 7.27  |
| chr2R | 9092604 | 9093206 | CG8080             | 14    | 43.3746 | 5.96  |
| chr2R | 9095134 | 9095515 | Uhg4               | 37    | 18.0948 | 3.99  |
| chr2R | 9095134 | 9095515 | snoRNA:Psi28S-2949 | 62    | 18.0948 | 3.99  |
| chr2R | 9116087 | 9116709 | Su(var)2-10        | 1     | 16.4803 | 3.72  |
| chr2R | 9126127 | 9126396 | GstE13             | 3941  | 17.4372 | 3.97  |
| chr2R | 9130440 | 9130723 | CG18659            | 1347  | 10.0177 | 2.78  |
| chr2R | 9131226 | 9131836 | CG18659            | 482   | 30.6476 | 5.19  |
| chr2R | 9132371 | 9132724 | Hydr1              | 42    | 9.20515 | 2.60  |
| chr2R | 9137060 | 9138040 | alc                | 108   | 215.892 | 14.91 |
| chr2R | 9138324 | 9138602 | CG8788             | 17    | 15.8592 | 3.61  |
| chr2R | 9138324 | 9138602 | CG44286            | 17    | 15.8592 | 3.61  |
| chr2R | 9138896 | 9139278 | CG44286            | 18    | 25.3317 | 4.73  |
| chr2R | 9138896 | 9139278 | CG8788             | 18    | 25.3317 | 4.73  |
| chr2R | 9140721 | 9141386 | CG44286            | 163   | 85.7419 | 8.51  |
| chr2R | 9144808 | 9145467 | CG30344            | 261   | 34.119  | 5.17  |
| chr2R | 9147536 | 9147936 | CG30345            | 952   | 62.3725 | 8.04  |
| chr2R | 9148408 | 9148917 | CG30345            | 72    | 90.0037 | 9.67  |
| chr2R | 9181145 | 9181400 | Rab32              | 40    | 10.7012 | 3.15  |
| chr2R | 9184679 | 9184957 | CR44284            | 1398  | 25.6254 | 4.85  |
| chr2R | 9185770 | 9186493 | Rab32              | 38    | 42.2411 | 5.14  |
| chr2R | 9191815 | 9192227 | CG8026             | 43    | 41.7763 | 5.08  |
| chr2R | 9191815 | 9192227 | CG45085            | 43    | 41.7763 | 5.08  |
| chr2R | 9191815 | 9192227 | CG8026             | 43    | 41.7763 | 5.08  |
| chr2R | 9194749 | 9195269 | unpg               | 229   | 59.6809 | 8.53  |
| chr2R | 9207059 | 9207861 | CG8027             | 213   | 44.1734 | 5.49  |
| chr2R | 9207059 | 9207861 | VhaAC45            | 223   | 44.1734 | 5.49  |
| chr2R | 9239912 | 9240295 | Cyp4p1             | 54    | 10.8746 | 3.09  |
| chr2R | 9247046 | 9247686 | hig                | 5     | 41.9921 | 7.20  |
| chr2R | 9274761 | 9275927 | Pkn                | 29    | 316.742 | 22.10 |
| chr2R | 9278690 | 9279391 | Pkn                | 3958  | 210.653 | 17.36 |
| chr2R | 9284024 | 9285194 | CR45132            | 564   | 316.742 | 24.06 |
| chr2R | 9284024 | 9285194 | Pkn                | 817   | 316.742 | 24.06 |
| chr2R | 9292100 | 9293019 | Drep2              | 885   | 316.742 | 20.97 |
| chr2R | 9293409 | 9294819 | Drep2              | 131   | 37.1145 | 5.47  |
| chr2R | 9303144 | 9303598 | Myd88              | 4961  | 19.5076 | 3.68  |
| chr2R | 9308004 | 9308843 | Myd88              | 97    | 287.349 | 18.69 |
| chr2R | 9376355 | 9377019 | CG13954            | 11431 | 51.85   | 8.02  |
| chr2R | 9388091 | 9388482 | CG13954            | 43    | 14.659  | 3.89  |
| chr2R | 9408733 | 9409971 | wun                | 488   | 316.742 | 28.02 |
| chr2R | 9413216 | 9413729 | wun                | 11    | 122.419 | 11.40 |
| chr2R | 9414084 | 9414474 | wun2               | 61    | 74.0384 | 9.92  |
| chr2R | 9426293 | 9427367 | Pdk                | 97    | 148.303 | 10.04 |
| chr2R | 9427868 | 9428276 | Pdk                | 1583  | 28.319  | 4.73  |
| chr2R | 9430000 | 9431714 | Pdk                | 4387  | 165.186 | 12.02 |
| chr2R | 9437693 | 9438122 | ced-6              | 2930  | 39.1275 | 5.43  |
| chr2R | 9440602 | 9443971 | ced-6              | 81    | 316.742 | 30.16 |
| chr2R | 9444822 | 9445138 | ced-6              | 92    | 15.5732 | 3.64  |
| chr2R | 9445971 | 9446801 | Camta              | 317   | 47.1618 | 5.97  |
| chr2R | 9503450 | 9503980 | brp                | 72    | 88.0073 | 10.25 |
| chr2R | 9504518 | 9504807 | brp                | 894   | 16.4023 | 4.23  |
| chr2R | 9506167 | 9506614 | brp                | 2605  | 59.47   | 7.89  |
| chr2R | 9515629 | 9515938 | brp                | 682   | 14.4217 | 3.42  |
| chr2R | 9519409 | 9519825 | brp                | 3156  | 24.0474 | 4.95  |
| chr2R | 9540389 | 9540769 | CG1888             | 6377  | 119.073 | 13.16 |
| chr2R | 9542533 | 9543158 | CG1888             | 4083  | 17.2898 | 3.69  |

|       |          |          |             |      |         |       |
|-------|----------|----------|-------------|------|---------|-------|
| chr2R | 9544073  | 9544723  | CG1888      | 2685 | 21.1815 | 4.00  |
| chr2R | 9546511  | 9547362  | CG1888      | 101  | 40.0501 | 5.89  |
| chr2R | 9547995  | 9548486  | CG1888      | 117  | 43.0252 | 6.33  |
| chr2R | 9549910  | 9550470  | CG1888      | 2131 | 26.1709 | 4.70  |
| chr2R | 9550840  | 9551317  | CR43651     | 1712 | 16.7012 | 3.63  |
| chr2R | 9551768  | 9555635  | CR43651     | 80   | 225.341 | 13.26 |
| chr2R | 9551768  | 9555635  | mir-14      | 838  | 225.341 | 13.26 |
| chr2R | 9556076  | 9556824  | mir-14      | 2617 | 29.9046 | 5.19  |
| chr2R | 9564883  | 9565788  | CR45281     | 102  | 99.9817 | 8.72  |
| chr2R | 9577264  | 9579059  | CG1814      | 107  | 139.709 | 12.17 |
| chr2R | 9577264  | 9579059  | Not1        | 477  | 139.709 | 12.17 |
| chr2R | 9577264  | 9579059  | CR46257     | 1371 | 139.709 | 12.17 |
| chr2R | 9577264  | 9579059  | Not1        | 1474 | 139.709 | 12.17 |
| chr2R | 9579415  | 9579728  | CG1814      | 86   | 12.0706 | 3.35  |
| chr2R | 9594042  | 9594443  | CG1902      | 235  | 18.8182 | 3.87  |
| chr2R | 9594042  | 9594443  | CG30338     | 235  | 18.8182 | 3.87  |
| chr2R | 9658006  | 9658426  | Mmp2        | 18   | 33.1096 | 5.58  |
| chr2R | 9683689  | 9684132  | Mmp2        | 74   | 71.3206 | 8.38  |
| chr2R | 9691870  | 9693420  | Uba1        | 588  | 155.724 | 13.18 |
| chr2R | 9711346  | 9712993  | dap         | 69   | 316.742 | 25.45 |
| chr2R | 9806716  | 9807038  | CG1688      | 16   | 17.3282 | 4.06  |
| chr2R | 9813040  | 9813333  | CG1648      | 371  | 14.76   | 3.49  |
| chr2R | 9814074  | 9814453  | lectin-46Cb | 1264 | 13.589  | 3.44  |
| chr2R | 9819823  | 9820436  | CG1648      | 112  | 183.957 | 12.78 |
| chr2R | 9833282  | 9834227  | hebe        | 71   | 56.4004 | 7.36  |
| chr2R | 9835055  | 9835404  | hebe        | 1438 | 21.1199 | 4.47  |
| chr2R | 9836449  | 9836988  | hebe        | 31   | 13.0667 | 3.21  |
| chr2R | 9836449  | 9836988  | CG1663      | 373  | 13.0667 | 3.21  |
| chr2R | 9860048  | 9862298  | PCB         | 66   | 316.742 | 21.64 |
| chr2R | 9860048  | 9862298  | CR44293     | 319  | 316.742 | 21.64 |
| chr2R | 9860048  | 9862298  | PCB         | 718  | 316.742 | 21.64 |
| chr2R | 9875049  | 9875475  | cbx         | 175  | 68.0132 | 7.48  |
| chr2R | 9875049  | 9875475  | CG12744     | 33   | 68.0132 | 7.48  |
| chr2R | 9881945  | 9882308  | Sec24AB     | 210  | 22.7232 | 4.31  |
| chr2R | 9903061  | 9904222  | CG1441      | 574  | 178.731 | 15.71 |
| chr2R | 9910759  | 9911112  | Etf-QO      | 30   | 13.6026 | 3.27  |
| chr2R | 9929498  | 9930356  | Mef2        | 246  | 131.568 | 14.59 |
| chr2R | 9942777  | 9943103  | Mef2        | 1799 | 27.1007 | 4.39  |
| chr2R | 9945723  | 9946002  | Mef2        | 1118 | 20.3396 | 3.99  |
| chr2R | 9949233  | 9950060  | Mef2        | 4813 | 316.742 | 27.65 |
| chr2R | 9954598  | 9955998  | Mef2        | 3562 | 316.742 | 41.57 |
| chr2R | 9957416  | 9959063  | Mef2        | 664  | 316.742 | 34.92 |
| chr2R | 9959914  | 9960305  | Pal1        | 13   | 8.75836 | 2.55  |
| chr2R | 9978925  | 9979452  | eve         | 76   | 63.5953 | 9.73  |
| chr2R | 9988170  | 9989312  | TER94       | 645  | 206.194 | 17.31 |
| chr2R | 9988170  | 9989312  | CR45324     | 772  | 206.194 | 17.31 |
| chr2R | 10003136 | 10003552 | mir-4967    | 8899 | 9.69091 | 3.36  |
| chr2R | 10025088 | 10026376 | Pka-R2      | 49   | 316.742 | 31.62 |
| chr2R | 10039940 | 10040749 | oys         | 610  | 14.7196 | 3.28  |
| chr2R | 10045843 | 10046097 | CR44295     | 1936 | 15.0172 | 3.58  |
| chr2R | 10047971 | 10048684 | COX7C       | 168  | 20.4149 | 3.79  |
| chr2R | 10047971 | 10048684 | oys         | 435  | 20.4149 | 3.79  |
| chr2R | 10052312 | 10053031 | magu        | 7    | 198.449 | 15.96 |
| chr2R | 10052312 | 10053031 | CR44297     | 448  | 198.449 | 15.96 |
| chr2R | 10076354 | 10076652 | CG1371      | 825  | 15.6368 | 3.71  |
| chr2R | 10077034 | 10077388 | egr         | 1152 | 18.8173 | 4.02  |
| chr2R | 10078030 | 10078664 | egr         | 24   | 316.742 | 28.06 |
| chr2R | 10087364 | 10087794 | CG2269      | 13   | 72.6341 | 10.00 |
| chr2R | 10096940 | 10097339 | Jra         | 161  | 12.8188 | 2.93  |
| chr2R | 10099507 | 10102475 | RpLP0-like  | 1365 | 316.742 | 32.89 |
| chr2R | 10099507 | 10102475 | 14-3-3zeta  | 80   | 316.742 | 32.89 |
| chr2R | 10103171 | 10103661 | 14-3-3zeta  | 290  | 24.7219 | 4.74  |
| chr2R | 10110879 | 10111273 | Pfk         | 256  | 15.6407 | 3.32  |
| chr2R | 10123601 | 10125408 | gem         | 84   | 316.742 | 28.79 |
| chr2R | 10125712 | 10126159 | gem         | 9    | 36.6575 | 5.65  |
| chr2R | 10129559 | 10129976 | gem         | 3802 | 30.8116 | 5.22  |
| chr2R | 10134566 | 10135377 | gem         | 497  | 316.742 | 24.33 |
| chr2R | 10155930 | 10156695 | KCNQ        | 1235 | 72.0408 | 8.59  |
| chr2R | 10158015 | 10158939 | mit         | 21   | 237.216 | 15.74 |
| chr2R | 10159339 | 10160429 | mit         | 951  | 316.742 | 40.11 |
| chr2R | 10192077 | 10192872 | KCNQ        | 2    | 140.742 | 11.29 |
| chr2R | 10210808 | 10211795 | Hr46        | 171  | 203.068 | 16.93 |
| chr2R | 10213850 | 10214579 | Hr46        | 2901 | 316.742 | 25.83 |
| chr2R | 10224580 | 10225613 | Hr46        | 2780 | 216.931 | 19.30 |
| chr2R | 10227785 | 10228573 | Hr46        | 221  | 271.012 | 23.21 |

|       |          |          |               |       |         |       |
|-------|----------|----------|---------------|-------|---------|-------|
| chr2R | 10233550 | 10235072 | CG12912       | 299   | 32.6254 | 5.63  |
| chr2R | 10233550 | 10235072 | Hr46          | 299   | 32.6254 | 5.63  |
| chr2R | 10233550 | 10235072 | CG12912       | 299   | 32.6254 | 5.63  |
| chr2R | 10238029 | 10238755 | CR45265       | 308   | 127.783 | 13.85 |
| chr2R | 10252196 | 10252450 | Syb           | 83    | 12.0465 | 3.25  |
| chr2R | 10270853 | 10271937 | CAP           | 654   | 45.5752 | 6.18  |
| chr2R | 10275318 | 10275814 | CAP           | 95    | 27.6062 | 4.96  |
| chr2R | 10302548 | 10303630 | CAP           | 40    | 316.742 | 25.54 |
| chr2R | 10304274 | 10304638 | CAP           | 1224  | 10.3833 | 3.16  |
| chr2R | 10350016 | 10350305 | CG43172       | 1783  | 19.2862 | 4.28  |
| chr2R | 10383488 | 10383847 | lr47a         | 3565  | 23.2452 | 5.34  |
| chr2R | 10395081 | 10396034 | CG42732       | 127   | 30.6062 | 6.26  |
| chr2R | 10417875 | 10418993 | Prx2540-2     | 529   | 316.742 | 24.44 |
| chr2R | 10420844 | 10422310 | CG11825       | 461   | 316.742 | 26.63 |
| chr2R | 10420844 | 10422310 | CG33474       | 175   | 316.742 | 26.63 |
| chr2R | 10420844 | 10422310 | CG11825       | 378   | 316.742 | 26.63 |
| chr2R | 10420844 | 10422310 | CG33474       | 661   | 316.742 | 26.63 |
| chr2R | 10423102 | 10424609 | CG11825       | 200   | 316.742 | 29.02 |
| chr2R | 10423102 | 10424609 | Prx2540-1     | 585   | 316.742 | 29.02 |
| chr2R | 10427765 | 10429323 | CG12896       | 558   | 316.742 | 35.26 |
| chr2R | 10429666 | 10431065 | RanBPM        | 576   | 316.742 | 31.81 |
| chr2R | 10432271 | 10432792 | RanBPM        | 2526  | 316.742 | 20.66 |
| chr2R | 10437725 | 10438608 | Galphao       | 36    | 316.742 | 30.76 |
| chr2R | 10443898 | 10444508 | Galphao       | 70    | 109.65  | 11.93 |
| chr2R | 10444908 | 10445237 | Galphao       | 57    | 36.7662 | 6.20  |
| chr2R | 10473858 | 10474120 | whd           | 1475  | 17.5704 | 3.69  |
| chr2R | 10474745 | 10475876 | whd           | 13    | 297.464 | 18.67 |
| chr2R | 10476821 | 10477190 | CR45134       | 989   | 37.5628 | 5.88  |
| chr2R | 10477565 | 10478811 | CR45134       | 102   | 316.742 | 42.60 |
| chr2R | 10477565 | 10478811 | whd           | 627   | 316.742 | 42.60 |
| chr2R | 10530511 | 10530901 | lola          | 3610  | 29.0691 | 5.10  |
| chr2R | 10534042 | 10535526 | lola          | 120   | 316.742 | 37.71 |
| chr2R | 10536024 | 10536446 | snoRNA:lola-a | 455   | 27.9106 | 5.02  |
| chr2R | 10537757 | 10538596 | snoRNA:lola-d | 695   | 38.9093 | 5.76  |
| chr2R | 10540284 | 10543655 | CR45135       | 133   | 316.742 | 23.20 |
| chr2R | 10540284 | 10543655 | lola          | 57    | 316.742 | 23.20 |
| chr2R | 10551600 | 10552263 | acal          | 4718  | 214.27  | 20.82 |
| chr2R | 10552986 | 10553301 | psq           | 4757  | 29.3832 | 5.69  |
| chr2R | 10553801 | 10554667 | psq           | 3648  | 316.742 | 25.41 |
| chr2R | 10555073 | 10555738 | psq           | 2522  | 316.742 | 27.39 |
| chr2R | 10557593 | 10559201 | psq           | 927   | 316.742 | 20.87 |
| chr2R | 10559538 | 10560090 | psq           | 1947  | 180.411 | 14.11 |
| chr2R | 10562782 | 10563052 | psq           | 5021  | 16.6337 | 4.03  |
| chr2R | 10564116 | 10564880 | psq           | 4405  | 87.2156 | 10.93 |
| chr2R | 10565971 | 10567254 | psq           | 2307  | 45.8395 | 7.40  |
| chr2R | 10568487 | 10569817 | psq           | 304   | 127.376 | 12.17 |
| chr2R | 10583227 | 10583738 | psq           | 95    | 14.7609 | 3.63  |
| chr2R | 10617347 | 10618900 | CG11883       | 910   | 316.742 | 41.79 |
| chr2R | 10730750 | 10731102 | CG12338       | 19    | 51.1752 | 6.44  |
| chr2R | 10733354 | 10733881 | CG7220        | 1064  | 7.99721 | 2.66  |
| chr2R | 10735190 | 10735889 | CG7220        | 88    | 52.6062 | 6.81  |
| chr2R | 10776921 | 10777279 | CG33144       | 5766  | 27.4159 | 4.87  |
| chr2R | 10781295 | 10783122 | CG33144       | 11    | 316.742 | 32.79 |
| chr2R | 10781295 | 10783122 | CR44299       | 36    | 316.742 | 32.79 |
| chr2R | 10798548 | 10799005 | CG33144       | 77    | 74.1146 | 7.99  |
| chr2R | 10806391 | 10807623 | wde           | 128   | 230.87  | 16.59 |
| chr2R | 10819785 | 10820048 | dgo           | 48    | 6.97395 | 2.36  |
| chr2R | 10819785 | 10820048 | Prosbeta5     | 45    | 6.97395 | 2.36  |
| chr2R | 10857772 | 10858118 | CR44302       | 1708  | 27.0358 | 5.43  |
| chr2R | 10861188 | 10862199 | CG30015       | 64    | 40.4055 | 5.56  |
| chr2R | 10871384 | 10871781 | CG30015       | 3256  | 14.1549 | 3.66  |
| chr2R | 10874269 | 10874952 | CG30015       | 79    | 60.6996 | 6.15  |
| chr2R | 10918283 | 10918595 | Obp47a        | 8501  | 26.4968 | 5.76  |
| chr2R | 11062271 | 11062858 | CG43188       | 22850 | 20.1295 | 4.06  |
| chr2R | 11065494 | 11065996 | CG43188       | 19856 | 50.3624 | 6.74  |
| chr2R | 11105627 | 11106975 | luna          | 27    | 28.0128 | 4.25  |
| chr2R | 11107407 | 11107824 | luna          | 773   | 110.006 | 12.25 |
| chr2R | 11115591 | 11116807 | luna          | 109   | 103.322 | 11.76 |
| chr2R | 11172152 | 11172503 | CG13229       | 84    | 16.9067 | 3.91  |
| chr2R | 11173349 | 11174108 | shn           | 80    | 316.742 | 26.12 |
| chr2R | 11175125 | 11176259 | shn           | 1581  | 95.116  | 9.72  |
| chr2R | 11178206 | 11179120 | shn           | 4303  | 38.639  | 6.32  |
| chr2R | 11181765 | 11182085 | shn           | 1364  | 12.4032 | 3.53  |
| chr2R | 11183943 | 11184443 | shn           | 1070  | 21.8989 | 4.64  |
| chr2R | 11185515 | 11186084 | shn           | 2612  | 153.155 | 12.23 |

|       |          |          |                   |      |         |       |
|-------|----------|----------|-------------------|------|---------|-------|
| chr2R | 11194252 | 11194743 | shn               | 3890 | 22.2864 | 4.72  |
| chr2R | 11196636 | 11197736 | shn               | 950  | 316.742 | 22.88 |
| chr2R | 11198081 | 11199305 | shn               | 667  | 165.025 | 13.81 |
| chr2R | 11202120 | 11204138 | shn               | 2210 | 316.742 | 23.18 |
| chr2R | 11204460 | 11205769 | shn               | 443  | 28.8746 | 4.42  |
| chr2R | 11206364 | 11207057 | shn               | 2317 | 11.4567 | 3.17  |
| chr2R | 11219565 | 11220220 | CG9084            | 176  | 69.7502 | 7.96  |
| chr2R | 11219565 | 11220220 | Syx6              | 14   | 69.7502 | 7.96  |
| chr2R | 11222422 | 11222960 | CG7737            | 225  | 110.31  | 11.58 |
| chr2R | 11231804 | 11233162 | metro             | 464  | 95.2095 | 12.61 |
| chr2R | 11279495 | 11280038 | CG9067            | 20   | 20.1481 | 3.83  |
| chr2R | 11279495 | 11280038 | Vhl               | 21   | 20.1481 | 3.83  |
| chr2R | 11283649 | 11284291 | CG9062            | 32   | 173.475 | 13.25 |
| chr2R | 11283649 | 11284291 | CG13220           | 343  | 173.475 | 13.25 |
| chr2R | 11288841 | 11289795 | Fbl6              | 360  | 116.587 | 9.95  |
| chr2R | 11297121 | 11297535 | CG42336           | 252  | 13.589  | 3.44  |
| chr2R | 11307209 | 11307650 | Fpps              | 70   | 27.5095 | 4.76  |
| chr2R | 11364309 | 11367792 | CG13204           | 803  | 316.742 | 28.50 |
| chr2R | 11370774 | 11371254 | Tapdelta          | 214  | 12.6248 | 3.06  |
| chr2R | 11383619 | 11384631 | Sod3              | 93   | 316.742 | 42.39 |
| chr2R | 11388118 | 11388415 | CG30022           | 471  | 19.6611 | 3.88  |
| chr2R | 11397174 | 11398142 | sprt              | 48   | 316.742 | 24.33 |
| chr2R | 11451793 | 11452856 | E(Pc)             | 27   | 33.8783 | 5.13  |
| chr2R | 11469400 | 11469811 | inv               | 4881 | 42.2208 | 6.85  |
| chr2R | 11475276 | 11476011 | inv               | 44   | 316.742 | 29.78 |
| chr2R | 11527700 | 11528698 | en                | 17   | 316.742 | 31.99 |
| chr2R | 11529365 | 11529992 | en                | 1471 | 316.742 | 19.80 |
| chr2R | 11534151 | 11534699 | en                | 6155 | 33.644  | 6.08  |
| chr2R | 11581921 | 11582328 | tou               | 521  | 24.1126 | 4.29  |
| chr2R | 11592292 | 11594564 | tou               | 66   | 316.742 | 25.23 |
| chr2R | 11596621 | 11597092 | tou               | 3739 | 16.9525 | 3.98  |
| chr2R | 11597462 | 11598088 | tou               | 4501 | 25.287  | 4.49  |
| chr2R | 11600695 | 11601878 | tou               | 3207 | 24.9208 | 4.78  |
| chr2R | 11603101 | 11603891 | tou               | 1374 | 316.742 | 25.80 |
| chr2R | 11604461 | 11605577 | tou               | 196  | 316.742 | 37.47 |
| chr2R | 11607153 | 11607896 | tou               | 2368 | 15.9713 | 3.94  |
| chr2R | 11613978 | 11614530 | tou               | 1911 | 18.0359 | 4.27  |
| chr2R | 11615087 | 11615362 | tou               | 868  | 11.3133 | 3.24  |
| chr2R | 11615733 | 11616592 | tou               | 41   | 167.14  | 12.61 |
| chr2R | 11615733 | 11616592 | CR43907           | 108  | 167.14  | 12.61 |
| chr2R | 11625678 | 11627029 | CG9005            | 5908 | 316.742 | 32.10 |
| chr2R | 11628918 | 11630307 | CG9005            | 2758 | 266.455 | 14.22 |
| chr2R | 11630728 | 11631987 | CG9005            | 1388 | 92.6411 | 8.78  |
| chr2R | 11632261 | 11633850 | CG9005            | 40   | 135.185 | 11.61 |
| chr2R | 11634978 | 11635541 | CG9005            | 2802 | 215.707 | 16.04 |
| chr2R | 11637081 | 11637946 | CG9005            | 3263 | 316.742 | 25.02 |
| chr2R | 11639478 | 11639769 | CG9005            | 1317 | 23.9393 | 3.74  |
| chr2R | 11640234 | 11641071 | CG9005            | 319  | 16.1019 | 3.33  |
| chr2R | 11648224 | 11648957 | CG9003            | 93   | 316.742 | 28.30 |
| chr2R | 11650729 | 11651801 | CG9003            | 590  | 169.161 | 11.92 |
| chr2R | 11656002 | 11656628 | CG13198           | 1409 | 28.0734 | 5.05  |
| chr2R | 11657366 | 11658318 | CG13198           | 3127 | 181.473 | 15.52 |
| chr2R | 11661152 | 11661683 | Tret1-1           | 4343 | 16.3667 | 3.85  |
| chr2R | 11662785 | 11663090 | Tret1-1           | 2831 | 22.276  | 4.58  |
| chr2R | 11665267 | 11665939 | Tret1-1           | 118  | 316.742 | 24.40 |
| chr2R | 11666325 | 11667092 | Tret1-1           | 1015 | 316.742 | 23.14 |
| chr2R | 11711971 | 11712444 | pyr               | 52   | 48.2621 | 7.59  |
| chr2R | 11756338 | 11756877 | ths               | 187  | 78.1386 | 8.78  |
| chr2R | 11757620 | 11758063 | ths               | 1003 | 68.4814 | 8.18  |
| chr2R | 11764432 | 11764879 | CG13193           | 3793 | 31.5835 | 5.17  |
| chr2R | 11765336 | 11765694 | CG13193           | 2878 | 12.7916 | 3.20  |
| chr2R | 11789929 | 11790251 | ths               | 269  | 33.8429 | 5.24  |
| chr2R | 11831930 | 11832299 | CG13192           | 6868 | 9.54414 | 3.32  |
| chr2R | 11833601 | 11833912 | Sobp              | 5777 | 28.5531 | 5.28  |
| chr2R | 11836615 | 11837085 | Sobp              | 2683 | 32.7609 | 4.90  |
| chr2R | 11845141 | 11845768 | Sln               | 39   | 26.1906 | 5.50  |
| chr2R | 11890259 | 11891086 | ERp60             | 39   | 27.492  | 4.45  |
| chr2R | 11891916 | 11893508 | Ef1alpha48D       | 882  | 138.451 | 11.16 |
| chr2R | 11891916 | 11893508 | snoRNA:Me28S-A132 | 119  | 138.451 | 11.16 |
| chr2R | 11899428 | 11899981 | Zip48C            | 82   | 22.8209 | 4.56  |
| chr2R | 11912719 | 11913007 | reb               | 52   | 13.7071 | 3.72  |
| chr2R | 11930260 | 11930613 | CR44312           | 661  | 9.7279  | 2.97  |
| chr2R | 12019615 | 12020085 | otk               | 60   | 171.997 | 12.43 |
| chr2R | 12025025 | 12025448 | otk2              | 29   | 59.2552 | 7.50  |
| chr2R | 12027646 | 12028250 | Mppe              | 107  | 9.72121 | 2.72  |

|       |          |          |           |      |         |       |
|-------|----------|----------|-----------|------|---------|-------|
| chr2R | 12027646 | 12028250 | pds5      | 170  | 9.72121 | 2.72  |
| chr2R | 12033894 | 12034633 | CG8321    | 142  | 27.7337 | 4.26  |
| chr2R | 12044389 | 12045419 | Drep1     | 21   | 301.229 | 18.50 |
| chr2R | 12050205 | 12050471 | CG30039   | 1437 | 21.5535 | 5.01  |
| chr2R | 12054710 | 12055190 | Drep3     | 163  | 71.6257 | 9.33  |
| chr2R | 12118810 | 12119599 | jeb       | 54   | 145.74  | 15.12 |
| chr2R | 12120271 | 12120806 | jeb       | 1160 | 23.3434 | 5.36  |
| chr2R | 12121162 | 12121854 | jeb       | 2181 | 20.2306 | 4.36  |
| chr2R | 12150341 | 12151085 | CG8878    | 193  | 17.0425 | 3.73  |
| chr2R | 12168475 | 12169232 | Oda       | 270  | 40.69   | 5.67  |
| chr2R | 12168475 | 12169232 | SmD3      | 28   | 40.69   | 5.67  |
| chr2R | 12169716 | 12171793 | mir-281-2 | 992  | 42.4941 | 5.76  |
| chr2R | 12169716 | 12171793 | mir-281-1 | 774  | 42.4941 | 5.76  |
| chr2R | 12169716 | 12171793 | Oda       | 49   | 42.4941 | 5.76  |
| chr2R | 12169716 | 12171793 | CR46194   | 76   | 42.4941 | 5.76  |
| chr2R | 12172843 | 12174453 | Oda       | 42   | 48.7559 | 5.69  |
| chr2R | 12252385 | 12253223 | CG13168   | 1016 | 196.101 | 16.73 |
| chr2R | 12259061 | 12259765 | Cam       | 46   | 257.382 | 16.07 |
| chr2R | 12259061 | 12259765 | CR43900   | 57   | 257.382 | 16.07 |
| chr2R | 12261074 | 12262060 | Cam       | 1390 | 316.742 | 22.48 |
| chr2R | 12279303 | 12280000 | CG42700   | 292  | 63.9562 | 7.78  |
| chr2R | 12306267 | 12306592 | CG13164   | 199  | 38.8508 | 6.27  |
| chr2R | 12306267 | 12306592 | CG17739   | 59   | 38.8508 | 6.27  |
| chr2R | 12313923 | 12314617 | CG30046   | 32   | 30.6062 | 6.26  |
| chr2R | 12326149 | 12326510 | CG8841    | 72   | 8.50399 | 2.61  |
| chr2R | 12326149 | 12326510 | garz      | 29   | 8.50399 | 2.61  |
| chr2R | 12337729 | 12338370 | Den1      | 231  | 29.5442 | 4.47  |
| chr2R | 12343958 | 12344700 | CG8839    | 122  | 48.5722 | 5.82  |
| chr2R | 12401727 | 12402108 | Cpr49Ae   | 385  | 18.8588 | 4.77  |
| chr2R | 12437298 | 12438178 | Dyb       | 204  | 15.871  | 3.23  |
| chr2R | 12438720 | 12439161 | Dyb       | 1589 | 101.556 | 9.14  |
| chr2R | 12452963 | 12454565 | Lac       | 999  | 316.742 | 42.58 |
| chr2R | 12461854 | 12463109 | dgt5      | 6042 | 109.965 | 11.19 |
| chr2R | 12471718 | 12472072 | dgt5      | 143  | 28.6653 | 4.91  |
| chr2R | 12471718 | 12472072 | CG8550    | 4    | 28.6653 | 4.91  |
| chr2R | 12473951 | 12474676 | Dh44-R2   | 156  | 316.742 | 26.08 |
| chr2R | 12504709 | 12505324 | fdl       | 298  | 40.3218 | 6.23  |
| chr2R | 12506952 | 12507287 | fdl       | 175  | 13.0667 | 3.21  |
| chr2R | 12528888 | 12529528 | fra       | 116  | 40.6785 | 5.22  |
| chr2R | 12534758 | 12535014 | fra       | 5880 | 7.43779 | 2.72  |
| chr2R | 12566007 | 12566329 | Cyp301a1  | 14   | 27.854  | 4.89  |
| chr2R | 12572096 | 12572559 | CIC-b     | 198  | 21.0983 | 3.94  |
| chr2R | 12586489 | 12590467 | Sin3A     | 1973 | 316.742 | 26.39 |
| chr2R | 12586489 | 12590467 | CR30055   | 2059 | 316.742 | 26.39 |
| chr2R | 12591128 | 12592933 | Sin3A     | 1124 | 316.742 | 21.10 |
| chr2R | 12593454 | 12593901 | Amph      | 71   | 42.3811 | 4.98  |
| chr2R | 12593454 | 12593901 | CR45279   | 153  | 42.3811 | 4.98  |
| chr2R | 12597636 | 12599054 | CR43909   | 3204 | 42.9689 | 6.47  |
| chr2R | 12601008 | 12601346 | CR43909   | 5541 | 28.165  | 4.65  |
| chr2R | 12602351 | 12602634 | CR43909   | 6856 | 15.2586 | 3.45  |
| chr2R | 12612318 | 12613575 | CG45086   | 26   | 16.9541 | 3.29  |
| chr2R | 12612318 | 12613575 | Galphaq   | 26   | 16.9541 | 3.29  |
| chr2R | 12670039 | 12670359 | nemy      | 33   | 17.7519 | 4.41  |
| chr2R | 12679423 | 12679911 | GLS       | 64   | 67.4896 | 9.55  |
| chr2R | 12686581 | 12687496 | CG13148   | 102  | 80.1568 | 8.83  |
| chr2R | 12704680 | 12705469 | CG42663   | 91   | 278.309 | 18.52 |
| chr2R | 12742877 | 12743486 | Mos       | 9693 | 238.664 | 18.47 |
| chr2R | 12756065 | 12756368 | Taz       | 125  | 8.53222 | 2.71  |
| chr2R | 12780162 | 12780708 | sca       | 93   | 130.986 | 13.90 |
| chr2R | 12868555 | 12868937 | CR45140   | 577  | 16.1658 | 3.66  |
| chr2R | 12870148 | 12870467 | bic       | 57   | 14.7065 | 3.48  |
| chr2R | 12884255 | 12884784 | vg        | 92   | 112.359 | 11.81 |
| chr2R | 12904199 | 12904918 | CR44461   | 1871 | 222.991 | 18.70 |
| chr2R | 12915996 | 12917893 | NAT1      | 208  | 73.5637 | 7.55  |
| chr2R | 12936133 | 12937056 | CG13322   | 79   | 53.1436 | 7.76  |
| chr2R | 12936133 | 12937056 | Sans      | 276  | 53.1436 | 7.76  |
| chr2R | 12955760 | 12956465 | CG13321   | 2447 | 167.938 | 11.78 |
| chr2R | 12958717 | 12959261 | CG13321   | 5539 | 28.5935 | 5.52  |
| chr2R | 12962852 | 12963150 | CG13321   | 9416 | 14.5516 | 3.74  |
| chr2R | 12979700 | 12981552 | Psc       | 116  | 316.742 | 38.28 |
| chr2R | 12984452 | 12986237 | CR44339   | 509  | 316.742 | 21.77 |
| chr2R | 12990478 | 12992380 | CG33798   | 2746 | 272.176 | 20.01 |
| chr2R | 12995944 | 12997835 | Su(z)2    | 13   | 316.742 | 23.67 |
| chr2R | 12998461 | 12998918 | Su(z)2    | 1580 | 38.7872 | 5.88  |
| chr2R | 13006058 | 13006321 | Su(z)2    | 8996 | 16.3449 | 3.91  |

|       |          |          |         |       |         |       |
|-------|----------|----------|---------|-------|---------|-------|
| chr2R | 13009129 | 13009709 | Su(z)2  | 12321 | 96.4672 | 11.86 |
| chr2R | 13014535 | 13016299 | Su(z)2  | 18638 | 316.742 | 50.65 |
| chr2R | 13025265 | 13025598 | CG13323 | 21814 | 12.2121 | 3.49  |
| chr2R | 13031943 | 13032568 | CG13323 | 15007 | 131.839 | 15.28 |
| chr2R | 13034910 | 13035813 | CG13323 | 11819 | 316.742 | 19.13 |
| chr2R | 13038573 | 13039739 | CG13323 | 8346  | 313.271 | 18.20 |
| chr2R | 13041891 | 13042662 | CG13323 | 5059  | 210.893 | 12.30 |
| chr2R | 13079332 | 13079841 | Drl-2   | 28    | 51.9646 | 7.94  |
| chr2R | 13157986 | 13158665 | TppII   | 79    | 41.4952 | 6.28  |
| chr2R | 13157986 | 13158665 | ND-MWFE | 447   | 41.4952 | 6.28  |
| chr2R | 13167807 | 13168085 | GLaz    | 45    | 12.4855 | 3.26  |
| chr2R | 13171116 | 13171729 | AGBE    | 29    | 54.3955 | 6.16  |
| chr2R | 13189062 | 13189589 | Kdm4B   | 71    | 143.75  | 15.18 |
| chr2R | 13189868 | 13190475 | CG17724 | 145   | 87.2378 | 10.81 |
| chr2R | 13189868 | 13190475 | Kdm4B   | 145   | 87.2378 | 10.81 |
| chr2R | 13189868 | 13190475 | seq     | 145   | 87.2378 | 10.81 |
| chr2R | 13189868 | 13190475 | CG17724 | 145   | 87.2378 | 10.81 |
| chr2R | 13189868 | 13190475 | seq     | 145   | 87.2378 | 10.81 |
| chr2R | 13191406 | 13191989 | CG17724 | 1530  | 88.1637 | 9.86  |
| chr2R | 13191406 | 13191989 | Kdm4B   | 1530  | 88.1637 | 9.86  |
| chr2R | 13191406 | 13191989 | seq     | 1530  | 88.1637 | 9.86  |
| chr2R | 13191406 | 13191989 | CG17724 | 1530  | 88.1637 | 9.86  |
| chr2R | 13191406 | 13191989 | seq     | 1530  | 88.1637 | 9.86  |
| chr2R | 13192842 | 13193141 | CG17724 | 2877  | 17.814  | 3.98  |
| chr2R | 13192842 | 13193141 | Kdm4B   | 2877  | 17.814  | 3.98  |
| chr2R | 13192842 | 13193141 | seq     | 2877  | 17.814  | 3.98  |
| chr2R | 13192842 | 13193141 | CG17724 | 2877  | 17.814  | 3.98  |
| chr2R | 13192842 | 13193141 | seq     | 2877  | 17.814  | 3.98  |
| chr2R | 13218996 | 13219624 | CG4630  | 77    | 269.519 | 18.84 |
| chr2R | 13222326 | 13222974 | Fsn     | 89    | 10.6058 | 2.86  |
| chr2R | 13222326 | 13222974 | Dp      | 5     | 10.6058 | 2.86  |
| chr2R | 13222326 | 13222974 | Fsn     | 32    | 10.6058 | 2.86  |
| chr2R | 13223236 | 13224413 | Dp      | 179   | 50.3879 | 5.91  |
| chr2R | 13337270 | 13337626 | CR44206 | 102   | 34.9991 | 5.86  |
| chr2R | 13344637 | 13345245 | CR44206 | 118   | 87.4288 | 11.11 |
| chr2R | 13362669 | 13363268 | CR45312 | 119   | 65.4676 | 9.89  |
| chr2R | 13424599 | 13425265 | CG42321 | 271   | 163.543 | 14.03 |
| chr2R | 13428564 | 13430227 | CG42321 | 28    | 308.235 | 17.43 |
| chr2R | 13449146 | 13450772 | cnn     | 478   | 316.742 | 25.95 |
| chr2R | 13449146 | 13450772 | cbs     | 588   | 316.742 | 25.95 |
| chr2R | 13469450 | 13469718 | CG43192 | 7786  | 10.6469 | 3.38  |
| chr2R | 13482604 | 13483394 | arr     | 63    | 59.5359 | 6.44  |
| chr2R | 13494464 | 13494935 | bbc     | 197   | 23.665  | 4.37  |
| chr2R | 13501734 | 13502978 | mars    | 3     | 316.742 | 27.75 |
| chr2R | 13501734 | 13502978 | drk     | 215   | 316.742 | 27.75 |
| chr2R | 13501734 | 13502978 | mars    | 850   | 316.742 | 27.75 |
| chr2R | 13506983 | 13507511 | EftuM   | 463   | 10.805  | 3.22  |
| chr2R | 13539506 | 13540200 | CG6145  | 177   | 316.742 | 22.67 |
| chr2R | 13545210 | 13545699 | CG6145  | 9     | 28.8448 | 4.56  |
| chr2R | 13554016 | 13554529 | Roe1    | 219   | 15.163  | 3.82  |
| chr2R | 13574059 | 13575184 | CG42808 | 74    | 57.1433 | 7.48  |
| chr2R | 13574059 | 13575184 | CR44365 | 581   | 57.1433 | 7.48  |
| chr2R | 13576194 | 13576960 | CR44366 | 1401  | 58.1723 | 8.34  |
| chr2R | 13577522 | 13578276 | CR44366 | 275   | 14.7001 | 3.43  |
| chr2R | 13587381 | 13587672 | CG6191  | 5850  | 16.1048 | 3.52  |
| chr2R | 13587381 | 13587672 | CG45088 | 5850  | 16.1048 | 3.52  |
| chr2R | 13589584 | 13589887 | CG6191  | 3590  | 10.7    | 2.98  |
| chr2R | 13589584 | 13589887 | CG45088 | 3590  | 10.7    | 2.98  |
| chr2R | 13591841 | 13593448 | CG6191  | 242   | 225.903 | 15.11 |
| chr2R | 13591841 | 13593448 | CG45088 | 242   | 225.903 | 15.11 |
| chr2R | 13620144 | 13620594 | fas     | 2649  | 33.3586 | 5.16  |
| chr2R | 13622658 | 13623259 | fas     | 128   | 229.006 | 22.15 |
| chr2R | 13805825 | 13806240 | stj     | 110   | 22.0038 | 4.59  |
| chr2R | 13822190 | 13823126 | fl(2)d  | 1681  | 294.14  | 18.04 |
| chr2R | 13823915 | 13824666 | fl(2)d  | 247   | 230.83  | 14.59 |
| chr2R | 13826137 | 13827092 | CG6329  | 175   | 141.825 | 12.91 |
| chr2R | 13829034 | 13829606 | CG6329  | 101   | 104.483 | 10.61 |
| chr2R | 13839720 | 13840337 | CG6357  | 45    | 316.742 | 20.62 |
| chr2R | 13845736 | 13846319 | Syng1   | 374   | 10.0569 | 3.04  |
| chr2R | 13853958 | 13854443 | CG6543  | 35    | 19.726  | 3.47  |
| chr2R | 13855491 | 13855921 | CG6553  | 47    | 38.2278 | 5.78  |
| chr2R | 13896269 | 13897032 | shot    | 1207  | 46.2171 | 6.73  |
| chr2R | 13897399 | 13898133 | shot    | 45    | 316.742 | 35.08 |
| chr2R | 13899000 | 13899376 | shot    | 1478  | 17.4684 | 3.92  |
| chr2R | 13912725 | 13913203 | shot    | 2080  | 19.163  | 4.09  |

|       |          |          |                    |       |         |       |
|-------|----------|----------|--------------------|-------|---------|-------|
| chr2R | 13918650 | 13920036 | shot               | 6617  | 81.9046 | 7.85  |
| chr2R | 13923921 | 13924472 | shot               | 1332  | 235.044 | 16.83 |
| chr2R | 13925223 | 13926263 | shot               | 92    | 316.742 | 54.23 |
| chr2R | 13934294 | 13935116 | shot               | 7281  | 119.008 | 10.98 |
| chr2R | 13937340 | 13937792 | shot               | 4621  | 10.6309 | 3.04  |
| chr2R | 13939697 | 13940075 | shot               | 2214  | 66.497  | 7.62  |
| chr2R | 13940933 | 13942376 | shot               | 894   | 316.742 | 21.80 |
| chr2R | 13953538 | 13954292 | AGO1               | 1     | 149.543 | 11.84 |
| chr2R | 13953538 | 13954292 | mRpL53             | 168   | 149.543 | 11.84 |
| chr2R | 13953538 | 13954292 | CG33155            | 168   | 149.543 | 11.84 |
| chr2R | 13956798 | 13958456 | AGO1               | 88    | 316.742 | 24.28 |
| chr2R | 13960499 | 13961388 | Cp1                | 186   | 32.9772 | 4.47  |
| chr2R | 13979430 | 13979904 | CG6701             | 8     | 41.2305 | 5.75  |
| chr2R | 13990229 | 13990785 | RN-tre             | 176   | 90.3789 | 8.27  |
| chr2R | 13991063 | 13992642 | mam                | 686   | 316.742 | 20.21 |
| chr2R | 13995501 | 13996212 | mam                | 4717  | 76.9015 | 8.94  |
| chr2R | 14000683 | 14001241 | mir-4978           | 5012  | 109.096 | 11.37 |
| chr2R | 14005596 | 14005863 | mir-4978           | 334   | 8.6116  | 2.80  |
| chr2R | 14006599 | 14007490 | mir-4978           | 845   | 316.742 | 33.82 |
| chr2R | 14008031 | 14009504 | mam                | 770   | 316.742 | 30.76 |
| chr2R | 14011632 | 14011947 | mam                | 2586  | 14.48   | 3.73  |
| chr2R | 14023897 | 14025124 | CG18371            | 3843  | 316.742 | 35.63 |
| chr2R | 14026867 | 14027184 | CG18371            | 1603  | 29.5898 | 5.07  |
| chr2R | 14030133 | 14030808 | mam                | 1089  | 32.1474 | 5.69  |
| chr2R | 14031155 | 14031892 | mam                | 114   | 63.4115 | 8.52  |
| chr2R | 14041022 | 14041684 | mam                | 9629  | 85.955  | 10.22 |
| chr2R | 14113878 | 14114359 | CG42288            | 23219 | 15.2794 | 3.54  |
| chr2R | 14139831 | 14141665 | Prosap             | 41    | 238.436 | 15.79 |
| chr2R | 14164452 | 14164769 | Tango7             | 11    | 25.1636 | 4.42  |
| chr2R | 14170368 | 14170623 | CG8331             | 28    | 13.6102 | 3.31  |
| chr2R | 14170981 | 14171469 | CG8331             | 62    | 16.0288 | 3.79  |
| chr2R | 14173579 | 14175908 | mRpS16             | 1214  | 97.8409 | 9.18  |
| chr2R | 14173579 | 14175908 | cg                 | 1118  | 97.8409 | 9.18  |
| chr2R | 14184922 | 14185715 | CG30069            | 142   | 188.679 | 14.53 |
| chr2R | 14185997 | 14186952 | CG30069            | 1421  | 273.258 | 18.65 |
| chr2R | 14212126 | 14213195 | Sox15              | 48    | 284.067 | 18.60 |
| chr2R | 14216329 | 14216771 | RpS23              | 0     | 17.8234 | 3.65  |
| chr2R | 14255443 | 14256529 | Hsc70-5            | 54    | 73.7474 | 8.69  |
| chr2R | 14255443 | 14256529 | CG8531             | 485   | 73.7474 | 8.69  |
| chr2R | 14265371 | 14266125 | CG8547             | 1666  | 316.742 | 27.32 |
| chr2R | 14267570 | 14268295 | CG8547             | 102   | 316.742 | 19.20 |
| chr2R | 14270078 | 14270982 | SelD               | 332   | 50.5884 | 6.56  |
| chr2R | 14270078 | 14270982 | conv               | 402   | 50.5884 | 6.56  |
| chr2R | 14275135 | 14275609 | lh                 | 719   | 68.1794 | 7.80  |
| chr2R | 14275894 | 14276229 | lh                 | 46    | 13.8687 | 3.45  |
| chr2R | 14276663 | 14276989 | lh                 | 729   | 13.8951 | 3.55  |
| chr2R | 14288968 | 14289774 | lh                 | 9     | 21.2502 | 4.06  |
| chr2R | 14306863 | 14308507 | Shroom             | 803   | 316.742 | 39.47 |
| chr2R | 14309721 | 14310003 | Shroom             | 1722  | 14.4803 | 3.62  |
| chr2R | 14332041 | 14332622 | Shroom             | 101   | 117.942 | 10.92 |
| chr2R | 14359973 | 14360434 | Arc1               | 23    | 316.742 | 24.93 |
| chr2R | 14361707 | 14362626 | Arc2               | 21    | 308.157 | 18.00 |
| chr2R | 14363003 | 14363294 | Tfb1               | 63    | 12.1935 | 3.33  |
| chr2R | 14432079 | 14432469 | phyl               | 28    | 37.2    | 6.76  |
| chr2R | 14435602 | 14435947 | Oaz                | 91    | 32.9389 | 5.77  |
| chr2R | 14437425 | 14437763 | Oaz                | 1675  | 23.4925 | 5.31  |
| chr2R | 14448937 | 14449317 | Oaz                | 9394  | 47.5554 | 8.11  |
| chr2R | 14456150 | 14456450 | Oaz                | 2193  | 21.5869 | 4.51  |
| chr2R | 14457821 | 14458633 | Oaz                | 328   | 217.445 | 19.08 |
| chr2R | 14481135 | 14482481 | PRAS40             | 390   | 38.1658 | 5.18  |
| chr2R | 14503766 | 14504541 | Asx                | 64    | 45.4571 | 5.62  |
| chr2R | 14513863 | 14514368 | CG30197            | 31    | 57.7597 | 7.68  |
| chr2R | 14526133 | 14527290 | ttv                | 456   | 182.703 | 13.71 |
| chr2R | 14574294 | 14576133 | LamC               | 81    | 156.045 | 11.24 |
| chr2R | 14576626 | 14577323 | LamC               | 1204  | 316.742 | 21.73 |
| chr2R | 14618629 | 14618958 | Sec61beta          | 50    | 17.7712 | 3.52  |
| chr2R | 14621527 | 14622142 | Uhg5               | 377   | 25.4402 | 4.41  |
| chr2R | 14621527 | 14622142 | snoRNA:Me18S-C136t | 196   | 25.4402 | 4.41  |
| chr2R | 14621527 | 14622142 | snoRNA:Me28S-C3227 | 110   | 25.4402 | 4.41  |
| chr2R | 14624534 | 14624859 | snoRNA:Or-CD4      | 469   | 33.5636 | 4.87  |
| chr2R | 14713364 | 14713931 | mspo               | 62    | 154.26  | 14.09 |
| chr2R | 14715728 | 14716171 | mspo               | 2324  | 165.302 | 18.28 |
| chr2R | 14745189 | 14745611 | CG12858            | 90    | 35.6367 | 5.61  |
| chr2R | 14746702 | 14747165 | AttA               | 502   | 61.6968 | 8.61  |
| chr2R | 14755711 | 14756273 | CG10151            | 15    | 20.3396 | 3.99  |

|       |          |          |           |       |         |       |
|-------|----------|----------|-----------|-------|---------|-------|
| chr2R | 14765471 | 14766077 | Spred     | 3744  | 30.3755 | 5.02  |
| chr2R | 14768342 | 14769312 | Spred     | 627   | 316.742 | 23.30 |
| chr2R | 14790423 | 14791080 | kn        | 6296  | 115.271 | 11.41 |
| chr2R | 14799002 | 14799855 | kn        | 719   | 67.8565 | 7.52  |
| chr2R | 14829173 | 14829489 | CG10205   | 3509  | 24.9044 | 5.56  |
| chr2R | 14848234 | 14848519 | CG10209   | 6     | 22.2765 | 4.79  |
| chr2R | 14870543 | 14870927 | Pcf11     | 401   | 16.226  | 3.19  |
| chr2R | 14871600 | 14871956 | Cyp6a22   | 101   | 26.7911 | 4.53  |
| chr2R | 14873683 | 14874204 | Cyp6a17   | 14    | 285.949 | 18.51 |
| chr2R | 14875638 | 14876046 | Cyp6a23   | 1     | 90.0218 | 9.57  |
| chr2R | 14881078 | 14881627 | Cyp6a9    | 13    | 154.601 | 14.27 |
| chr2R | 14881913 | 14882350 | Cyp6a20   | 4     | 84.9398 | 9.42  |
| chr2R | 14886705 | 14887093 | Cyp6a21   | 55    | 33.5987 | 5.52  |
| chr2R | 14898895 | 14899622 | Cyp317a1  | 2     | 268.583 | 20.28 |
| chr2R | 14907946 | 14908522 | Kank      | 334   | 79.0434 | 8.92  |
| chr2R | 14917156 | 14917894 | Kank      | 10    | 70.4573 | 9.44  |
| chr2R | 14921136 | 14921539 | Kank      | 3974  | 42.6616 | 5.50  |
| chr2R | 14927978 | 14928613 | Kank      | 165   | 176.216 | 14.59 |
| chr2R | 14932792 | 14933539 | CG10253   | 6     | 49.343  | 7.13  |
| chr2R | 14932792 | 14933539 | CG12853   | 204   | 49.343  | 7.13  |
| chr2R | 14933838 | 14934205 | CG12853   | 482   | 34.5396 | 5.93  |
| chr2R | 14935411 | 14936089 | Lap1      | 178   | 72.1138 | 6.82  |
| chr2R | 14954295 | 14954935 | aPKC      | 3692  | 109.078 | 12.33 |
| chr2R | 14958249 | 14959408 | aPKC      | 712   | 91.1141 | 9.38  |
| chr2R | 14962167 | 14963475 | aPKC      | 440   | 185.836 | 14.66 |
| chr2R | 14962167 | 14963475 | ckn       | 762   | 185.836 | 14.66 |
| chr2R | 14964006 | 14965922 | ckn       | 989   | 316.742 | 24.30 |
| chr2R | 14970001 | 14970471 | ckn       | 4554  | 95.5762 | 10.18 |
| chr2R | 14973154 | 14973876 | ckn       | 2562  | 45.5752 | 6.18  |
| chr2R | 14981716 | 14982062 | pcs       | 663   | 30.0418 | 4.80  |
| chr2R | 15010525 | 15011507 | hbs       | 545   | 166.127 | 13.75 |
| chr2R | 15109416 | 15109772 | chn       | 5734  | 7.05692 | 2.40  |
| chr2R | 15114976 | 15116647 | chn       | 931   | 95.6614 | 11.19 |
| chr2R | 15127893 | 15129084 | chn       | 453   | 167.293 | 13.82 |
| chr2R | 15135036 | 15135934 | chn       | 6505  | 316.742 | 26.92 |
| chr2R | 15155117 | 15155600 | igl       | 96    | 70.5594 | 9.58  |
| chr2R | 15231778 | 15232133 | CR44370   | 5035  | 10.3226 | 3.48  |
| chr2R | 15241374 | 15242115 | Fs        | 13    | 30.3392 | 5.57  |
| chr2R | 15248275 | 15249422 | scb       | 304   | 143.298 | 14.80 |
| chr2R | 15252265 | 15252915 | scb       | 90    | 316.742 | 45.59 |
| chr2R | 15290557 | 15291905 | Trpm      | 16    | 144.172 | 12.42 |
| chr2R | 15307942 | 15309565 | Trpm      | 32    | 206.375 | 14.47 |
| chr2R | 15322389 | 15323260 | Arf51F    | 53    | 177.691 | 12.97 |
| chr2R | 15329130 | 15329771 | CG8160    | 1185  | 49.7513 | 7.39  |
| chr2R | 15330608 | 15331237 | CR44371   | 411   | 51.547  | 8.30  |
| chr2R | 15349360 | 15349905 | unc-5     | 487   | 209.376 | 17.70 |
| chr2R | 15380745 | 15381108 | dup       | 0     | 23.0776 | 4.55  |
| chr2R | 15400817 | 15401295 | CG43729   | 101   | 69.5108 | 9.85  |
| chr2R | 15424611 | 15425443 | CG43729   | 122   | 250.279 | 21.13 |
| chr2R | 15474369 | 15474905 | CG8180    | 8289  | 13.3157 | 3.30  |
| chr2R | 15482372 | 15483105 | CG8180    | 20    | 269.927 | 17.63 |
| chr2R | 15511541 | 15511984 | GalNAc-T1 | 30    | 25.1116 | 4.01  |
| chr2R | 15531377 | 15532301 | Khc-73    | 660   | 27.779  | 4.75  |
| chr2R | 15541312 | 15541616 | CG8187    | 83    | 16.4803 | 3.72  |
| chr2R | 15541312 | 15541616 | Vha36-1   | 12    | 16.4803 | 3.72  |
| chr2R | 15569118 | 15569649 | Flo1      | 34    | 63.9863 | 6.85  |
| chr2R | 15600018 | 15600805 | CG42524   | 13362 | 316.742 | 24.65 |
| chr2R | 15609884 | 15610346 | CG42524   | 3701  | 67.6925 | 9.59  |
| chr2R | 15610752 | 15611591 | CG42524   | 2794  | 277.84  | 24.90 |
| chr2R | 15613133 | 15615237 | CG42524   | 102   | 316.742 | 40.28 |
| chr2R | 15634487 | 15634950 | CG42524   | 20884 | 67.4896 | 9.55  |
| chr2R | 15648779 | 15649166 | mir-278   | 8157  | 16.68   | 4.23  |
| chr2R | 15657725 | 15658163 | mir-278   | 866   | 33.2774 | 5.92  |
| chr2R | 15660742 | 15661050 | mir-278   | 3795  | 18.7317 | 4.29  |
| chr2R | 15668740 | 15669082 | fus       | 3826  | 12.6549 | 3.54  |
| chr2R | 15674828 | 15676926 | fus       | 167   | 316.742 | 31.50 |
| chr2R | 15674828 | 15676926 | CR45143   | 320   | 316.742 | 31.50 |
| chr2R | 15674828 | 15676926 | fus       | 549   | 316.742 | 31.50 |
| chr2R | 15699084 | 15699364 | CG42662   | 1     | 8.36912 | 2.95  |
| chr2R | 15727123 | 15727519 | CG30089   | 87    | 40.2833 | 5.86  |
| chr2R | 15734785 | 15735816 | CG30089   | 113   | 316.742 | 32.40 |
| chr2R | 15754130 | 15754774 | CG30089   | 19136 | 13.91   | 3.21  |
| chr2R | 15816693 | 15817423 | Zasp52    | 88    | 316.742 | 24.34 |
| chr2R | 15835061 | 15835393 | Poxn      | 171   | 15.9714 | 4.35  |
| chr2R | 15843354 | 15843878 | CG8249    | 3789  | 119.931 | 10.84 |



|       |          |          |              |      |         |       |
|-------|----------|----------|--------------|------|---------|-------|
| chr2R | 15847163 | 15847553 | CG8249       | 41   | 31.1159 | 5.81  |
| chr2R | 15847992 | 15849002 | tun          | 43   | 27.4159 | 4.87  |
| chr2R | 15851266 | 15851641 | tun          | 2884 | 22.0066 | 4.41  |
| chr2R | 15861108 | 15862204 | Gpo-1        | 13   | 316.742 | 18.54 |
| chr2R | 15862711 | 15863213 | Gpo-1        | 88   | 12.99   | 3.51  |
| chr2R | 15930995 | 15932074 | bdg          | 481  | 28.0734 | 5.05  |
| chr2R | 15951826 | 15952482 | Strn-Mlck    | 35   | 199.925 | 18.25 |
| chr2R | 16000103 | 16000514 | ATPCL        | 13   | 14.9793 | 3.36  |
| chr2R | 16007484 | 16007794 | CG8386       | 1    | 15.2663 | 3.49  |
| chr2R | 16017551 | 16018387 | CG8399       | 1    | 80.6848 | 8.41  |
| chr2R | 16030918 | 16032186 | SP2353       | 629  | 137.394 | 13.99 |
| chr2R | 16047464 | 16047903 | CG8405       | 37   | 33.8889 | 5.37  |
| chr2R | 16070815 | 16071324 | mir-137      | 5804 | 17.7362 | 4.56  |
| chr2R | 16097963 | 16098717 | Dg           | 244  | 249.603 | 15.62 |
| chr2R | 16102484 | 16105085 | CG8414       | 1879 | 316.742 | 34.69 |
| chr2R | 16102484 | 16105085 | Rho1         | 1022 | 316.742 | 34.69 |
| chr2R | 16109792 | 16110044 | Ric          | 46   | 8.84149 | 2.98  |
| chr2R | 16124845 | 16125739 | spin         | 291  | 193.78  | 13.54 |
| chr2R | 16126179 | 16126762 | spin         | 1710 | 9.26653 | 2.67  |
| chr2R | 16128990 | 16130681 | spin         | 5289 | 316.742 | 39.84 |
| chr2R | 16135488 | 16135782 | Got1         | 2679 | 14.6183 | 3.07  |
| chr2R | 16138707 | 16139243 | Got1         | 299  | 71.4231 | 8.31  |
| chr2R | 16149980 | 16151246 | lbk          | 879  | 123.05  | 10.92 |
| chr2R | 16159945 | 16160982 | CG10734      | 1616 | 11.8463 | 3.51  |
| chr2R | 16178762 | 16180664 | Lis-1        | 793  | 153.581 | 12.67 |
| chr2R | 16187058 | 16188220 | clu          | 85   | 294.166 | 19.61 |
| chr2R | 16196927 | 16197324 | CG42837      | 97   | 30.6421 | 4.73  |
| chr2R | 16196927 | 16197324 | CG44243      | 97   | 30.6421 | 4.73  |
| chr2R | 16209892 | 16210827 | mrj          | 110  | 316.742 | 23.79 |
| chr2R | 16220778 | 16221880 | CR43898      | 333  | 189.701 | 14.05 |
| chr2R | 16220778 | 16221880 | mrj          | 491  | 189.701 | 14.05 |
| chr2R | 16226028 | 16226752 | CG15706      | 259  | 129.221 | 10.97 |
| chr2R | 16226028 | 16226752 | Tsf3         | 11   | 129.221 | 10.97 |
| chr2R | 16259670 | 16259995 | CngA         | 22   | 19.5844 | 4.87  |
| chr2R | 16270254 | 16271027 | Khc          | 1417 | 225.137 | 14.82 |
| chr2R | 16289091 | 16289954 | Jhl-26       | 36   | 316.742 | 18.90 |
| chr2R | 16335696 | 16337321 | Hmgs         | 89   | 214.477 | 15.98 |
| chr2R | 16335696 | 16337321 | Vha44        | 637  | 214.477 | 15.98 |
| chr2R | 16335696 | 16337321 | Hmgs         | 759  | 214.477 | 15.98 |
| chr2R | 16386261 | 16387003 | Sema-2b      | 33   | 38.7872 | 5.88  |
| chr2R | 16398634 | 16399106 | Sema-2b      | 45   | 56.433  | 7.80  |
| chr2R | 16499718 | 16500347 | Sema-2a      | 158  | 142.656 | 14.27 |
| chr2R | 16517026 | 16517339 | Sema-2a      | 734  | 24.2433 | 5.23  |
| chr2R | 16551935 | 16552493 | Syn2         | 63   | 97.1091 | 8.57  |
| chr2R | 16579309 | 16581144 | Cdk4         | 29   | 47.2493 | 5.70  |
| chr2R | 16583155 | 16584347 | CR44375      | 558  | 316.742 | 20.23 |
| chr2R | 16585536 | 16586064 | RpLP2        | 373  | 144.173 | 13.28 |
| chr2R | 16588953 | 16589279 | CG8311       | 30   | 13.3419 | 3.22  |
| chr2R | 16593262 | 16593554 | CG8306       | 1251 | 18.0307 | 3.92  |
| chr2R | 16594022 | 16594993 | CG8306       | 276  | 159.783 | 13.25 |
| chr2R | 16604008 | 16604616 | CG8303       | 62   | 39.4994 | 6.16  |
| chr2R | 16607634 | 16609640 | CG5065       | 72   | 124.771 | 12.53 |
| chr2R | 16637893 | 16638566 | Alk          | 278  | 45.3252 | 6.42  |
| chr2R | 16641004 | 16641354 | gprs         | 67   | 10.6309 | 3.04  |
| chr2R | 16658984 | 16659424 | Picot        | 16   | 37.2017 | 5.75  |
| chr2R | 16667543 | 16668171 | Picot        | 339  | 29.3301 | 5.68  |
| chr2R | 16689417 | 16689954 | CG5210       | 1359 | 49.4883 | 6.83  |
| chr2R | 16691454 | 16691934 | CG5210       | 32   | 59.5922 | 6.82  |
| chr2R | 16731106 | 16731724 | CG30463      | 57   | 70.2912 | 7.81  |
| chr2R | 16764302 | 16764794 | CG42392      | 1447 | 60.6546 | 7.83  |
| chr2R | 16764302 | 16764794 | unc-104      | 1447 | 60.6546 | 7.83  |
| chr2R | 16765830 | 16766137 | CG42392      | 2    | 15.0084 | 3.97  |
| chr2R | 16765830 | 16766137 | unc-104      | 2    | 15.0084 | 3.97  |
| chr2R | 16772437 | 16772721 | unc-104      | 23   | 11.1296 | 2.77  |
| chr2R | 16818932 | 16819594 | CR43417      | 76   | 42.6855 | 5.61  |
| chr2R | 16828712 | 16829165 | CR43650      | 131  | 52.4296 | 6.43  |
| chr2R | 16830423 | 16830995 | CR43650      | 41   | 57.1021 | 6.93  |
| chr2R | 16837028 | 16837474 | mir-8        | 5672 | 8.05875 | 2.64  |
| chr2R | 16856072 | 16857493 | Dek          | 48   | 316.742 | 22.71 |
| chr2R | 16856072 | 16857493 | snoRNA:Dek-a | 819  | 316.742 | 22.71 |
| chr2R | 16869157 | 16869674 | CG6426       | 15   | 153.425 | 10.00 |
| chr2R | 16872079 | 16872485 | CG6421       | 5    | 21.2502 | 4.06  |
| chr2R | 16873698 | 16874019 | CG6435       | 131  | 23.5543 | 4.58  |
| chr2R | 16895242 | 16896036 | mir-990      | 370  | 49.1016 | 7.66  |
| chr2R | 16895242 | 16896036 | CG8910       | 26   | 49.1016 | 7.66  |

|       |          |          |            |      |         |       |
|-------|----------|----------|------------|------|---------|-------|
| chr2R | 16896685 | 16897079 | CG8910     | 1168 | 23.942  | 4.37  |
| chr2R | 16924486 | 16925077 | Pkc53E     | 131  | 93.0923 | 9.59  |
| chr2R | 16960892 | 16961212 | CG9010     | 859  | 28.5973 | 5.69  |
| chr2R | 16973697 | 16974063 | Cbp53E     | 23   | 20.5066 | 4.35  |
| chr2R | 17020187 | 17020761 | Dark       | 380  | 62.5097 | 7.97  |
| chr2R | 17026589 | 17028694 | CR44390    | 1415 | 316.742 | 25.90 |
| chr2R | 17026589 | 17028694 | RhoGEF2    | 1219 | 316.742 | 25.90 |
| chr2R | 17048898 | 17049296 | CG9646     | 10   | 21.8867 | 4.12  |
| chr2R | 17084778 | 17085360 | CG30460    | 2499 | 22.0912 | 4.06  |
| chr2R | 17087397 | 17087845 | CG30460    | 33   | 73.2108 | 9.41  |
| chr2R | 17091586 | 17092010 | Sply       | 133  | 12.5232 | 3.31  |
| chr2R | 17091586 | 17092010 | CG6984     | 158  | 12.5232 | 3.31  |
| chr2R | 17097084 | 17098810 | GstS1      | 23   | 316.742 | 33.31 |
| chr2R | 17099847 | 17100554 | CG30456    | 68   | 316.742 | 27.99 |
| chr2R | 17101810 | 17102082 | CG30456    | 997  | 19.0419 | 4.30  |
| chr2R | 17102590 | 17103262 | CG30456    | 74   | 55.2928 | 7.98  |
| chr2R | 17108484 | 17109082 | CG15611    | 5    | 152.205 | 14.12 |
| chr2R | 17133786 | 17134384 | CG11400    | 66   | 316.742 | 21.55 |
| chr2R | 17136139 | 17136734 | Gbp        | 52   | 316.742 | 21.01 |
| chr2R | 17139636 | 17140191 | CG43103    | 17   | 166.212 | 12.67 |
| chr2R | 17140617 | 17140917 | CG43107    | 104  | 25.3684 | 4.87  |
| chr2R | 17215599 | 17216476 | mbl        | 705  | 219.286 | 18.95 |
| chr2R | 17261644 | 17262202 | CR45997    | 455  | 108.538 | 9.45  |
| chr2R | 17264899 | 17265782 | mbl        | 65   | 316.742 | 19.86 |
| chr2R | 17392202 | 17392806 | CG10939    | 2028 | 30.26   | 4.40  |
| chr2R | 17394369 | 17395027 | CG10939    | 91   | 152.785 | 13.28 |
| chr2R | 17401120 | 17401634 | CG6568     | 5715 | 55.6727 | 7.23  |
| chr2R | 17406832 | 17407423 | CG6568     | 221  | 15.6041 | 3.65  |
| chr2R | 17420091 | 17422461 | l(2)k01209 | 454  | 221.247 | 13.29 |
| chr2R | 17427446 | 17428043 | CG6550     | 11   | 11.3602 | 3.29  |
| chr2R | 17427446 | 17428043 | Mtap       | 294  | 11.3602 | 3.29  |
| chr2R | 17435160 | 17437258 | CG18467    | 3804 | 105.51  | 9.36  |
| chr2R | 17438992 | 17439734 | CG18467    | 782  | 32.2511 | 5.71  |
| chr2R | 17440130 | 17440679 | CG18467    | 92   | 30.0675 | 5.16  |
| chr2R | 17444462 | 17445134 | EDTP       | 150  | 39.1347 | 5.32  |
| chr2R | 17457590 | 17458973 | CG14478    | 91   | 39.2552 | 5.82  |
| chr2R | 17462186 | 17462581 | CG14478    | 1766 | 67.1263 | 9.01  |
| chr2R | 17469545 | 17470202 | qkr54B     | 71   | 13.6168 | 3.23  |
| chr2R | 17484592 | 17485145 | NT5E-2     | 196  | 111.46  | 13.36 |
| chr2R | 17535003 | 17535941 | Patronin   | 69   | 134.568 | 11.25 |
| chr2R | 17536280 | 17536588 | eIF3-S9    | 59   | 15.3705 | 3.15  |
| chr2R | 17547626 | 17548690 | MESR4      | 83   | 316.742 | 27.11 |
| chr2R | 17592807 | 17593742 | Smurf      | 384  | 165.363 | 13.97 |
| chr2R | 17623066 | 17623347 | CG44403    | 5357 | 12.8238 | 3.63  |
| chr2R | 17639028 | 17639368 | CG10936    | 71   | 34.1305 | 5.62  |
| chr2R | 17665505 | 17665888 | eIF3-S8    | 2    | 10.8708 | 2.75  |
| chr2R | 17682959 | 17684053 | Sema-1b    | 322  | 65.9017 | 7.46  |
| chr2R | 17682959 | 17684053 | HPS4       | 248  | 65.9017 | 7.46  |
| chr2R | 17686380 | 17686923 | HPS4       | 41   | 183.957 | 12.78 |
| chr2R | 17708874 | 17709456 | CG6424     | 57   | 173.694 | 13.89 |
| chr2R | 17716169 | 17718021 | CG6424     | 261  | 316.742 | 27.60 |
| chr2R | 17719046 | 17719851 | CG6424     | 54   | 153.901 | 12.71 |
| chr2R | 17721411 | 17722104 | CG10934    | 706  | 42.0397 | 6.55  |
| chr2R | 17726632 | 17726919 | Snx16      | 146  | 8.31446 | 2.66  |
| chr2R | 17726632 | 17726919 | CG4984     | 212  | 8.31446 | 2.66  |
| chr2R | 17726632 | 17726919 | CG4975     | 212  | 8.31446 | 2.66  |
| chr2R | 17726632 | 17726919 | CG4984     | 212  | 8.31446 | 2.66  |
| chr2R | 17739626 | 17740046 | CG6401     | 286  | 9.84442 | 2.88  |
| chr2R | 17739626 | 17740046 | CG4996     | 71   | 9.84442 | 2.88  |
| chr2R | 17750049 | 17750705 | CG5002     | 85   | 273.179 | 17.31 |
| chr2R | 17760506 | 17761570 | CG5009     | 201  | 157.986 | 12.41 |
| chr2R | 17766694 | 17767018 | CR44416    | 15   | 8.71584 | 2.75  |
| chr2R | 17789010 | 17789502 | Ubc10      | 210  | 21.1336 | 4.19  |
| chr2R | 17792405 | 17793107 | Dhit       | 132  | 204.802 | 13.81 |
| chr2R | 17793828 | 17794594 | Dhit       | 1387 | 116.793 | 12.73 |
| chr2R | 17795919 | 17796582 | Dhit       | 3339 | 149.399 | 15.37 |
| chr2R | 17800759 | 17803186 | CR45270    | 56   | 316.742 | 22.28 |
| chr2R | 17800759 | 17803186 | grh        | 14   | 316.742 | 22.28 |
| chr2R | 17800759 | 17803186 | CR45270    | 352  | 316.742 | 22.28 |
| chr2R | 17800759 | 17803186 | grh        | 1128 | 316.742 | 22.28 |
| chr2R | 17803950 | 17804809 | grh        | 1420 | 307.564 | 19.64 |
| chr2R | 17807158 | 17807747 | grh        | 4720 | 9.56063 | 3.06  |
| chr2R | 17813317 | 17814371 | grh        | 270  | 162.315 | 12.81 |
| chr2R | 17814801 | 17815145 | grh        | 600  | 38.6821 | 6.08  |
| chr2R | 17820869 | 17821151 | grh        | 2551 | 20.2185 | 4.48  |

|       |          |          |            |       |         |       |
|-------|----------|----------|------------|-------|---------|-------|
| chr2R | 17821993 | 17822858 | grh        | 1034  | 60.4654 | 7.46  |
| chr2R | 17823223 | 17824205 | grh        | 66    | 53.9056 | 7.10  |
| chr2R | 17832162 | 17832836 | grh        | 8828  | 47.8726 | 6.20  |
| chr2R | 17843283 | 17843549 | olf186-F   | 7     | 11.6404 | 3.41  |
| chr2R | 17845853 | 17847502 | olf186-M   | 91    | 316.742 | 23.51 |
| chr2R | 17850805 | 17851841 | olf186-F   | 720   | 316.742 | 25.54 |
| chr2R | 17857175 | 17857542 | olf186-F   | 2116  | 40.5659 | 7.09  |
| chr2R | 17869022 | 17869741 | CR44417    | 332   | 123.89  | 9.53  |
| chr2R | 17870089 | 17872136 | Mapmodulin | 1200  | 35.258  | 4.96  |
| chr2R | 17873625 | 17874053 | Elk        | 83    | 23.0009 | 4.31  |
| chr2R | 18007697 | 18008179 | dpr13      | 90    | 47.6938 | 8.14  |
| chr2R | 18008479 | 18008862 | dpr13      | 778   | 85.0551 | 11.72 |
| chr2R | 18125655 | 18125958 | stau       | 41    | 26.2595 | 4.66  |
| chr2R | 18128328 | 18128869 | Dlip3      | 45    | 43.0266 | 6.40  |
| chr2R | 18133550 | 18134705 | Hsf        | 878   | 67.583  | 7.87  |
| chr2R | 18135449 | 18135855 | Pcl        | 235   | 41.982  | 6.37  |
| chr2R | 18140592 | 18142341 | pAbp       | 99    | 110.283 | 10.35 |
| chr2R | 18151201 | 18152037 | CG5742     | 393   | 23.8345 | 4.30  |
| chr2R | 18151201 | 18152037 | adp        | 50    | 23.8345 | 4.30  |
| chr2R | 18156162 | 18158331 | lolal      | 79    | 316.742 | 21.97 |
| chr2R | 18156162 | 18158331 | CG10914    | 1285  | 316.742 | 21.97 |
| chr2R | 18179751 | 18180084 | CG5726     | 162   | 7.77854 | 2.76  |
| chr2R | 18183897 | 18184291 | CG5721     | 41    | 25.9006 | 4.84  |
| chr2R | 18229747 | 18230042 | CR45311    | 1336  | 21.9962 | 4.87  |
| chr2R | 18231010 | 18231526 | CR45311    | 48    | 143.239 | 11.71 |
| chr2R | 18232393 | 18233007 | fj         | 93    | 309.138 | 24.73 |
| chr2R | 18288680 | 18288977 | CG14502    | 120   | 30.0639 | 5.67  |
| chr2R | 18288680 | 18288977 | sbb        | 54    | 30.0639 | 5.67  |
| chr2R | 18289910 | 18290372 | CG14502    | 809   | 10.4857 | 3.23  |
| chr2R | 18309447 | 18310037 | Tango8     | 2007  | 132.695 | 13.68 |
| chr2R | 18317647 | 18318222 | Tango8     | 6152  | 13.8951 | 3.55  |
| chr2R | 18331823 | 18332297 | Tango8     | 20240 | 50.7172 | 7.49  |
| chr2R | 18334811 | 18335658 | sbb        | 22179 | 67.8253 | 8.72  |
| chr2R | 18342676 | 18343435 | sbb        | 14405 | 37.7772 | 6.50  |
| chr2R | 18351537 | 18352187 | sbb        | 5457  | 35.5209 | 5.46  |
| chr2R | 18352821 | 18354256 | sbb        | 3259  | 37.9558 | 5.10  |
| chr2R | 18354676 | 18358109 | sbb        | 361   | 316.742 | 36.15 |
| chr2R | 18374313 | 18375335 | CR42736    | 2397  | 17.4341 | 4.57  |
| chr2R | 18381757 | 18382069 | CG43202    | 65    | 18.1418 | 4.67  |
| chr2R | 18384427 | 18384682 | CG18107    | 3     | 14.7    | 4.17  |
| chr2R | 18387696 | 18388299 | IM3        | 56    | 68.8714 | 8.71  |
| chr2R | 18398279 | 18398673 | GstE1      | 78    | 71.1315 | 8.53  |
| chr2R | 18398279 | 18398673 | GstE10     | 49    | 71.1315 | 8.53  |
| chr2R | 18400413 | 18401093 | GstE3      | 33    | 316.742 | 21.49 |
| chr2R | 18401703 | 18402290 | GstE4      | 1259  | 291.003 | 17.46 |
| chr2R | 18404448 | 18405462 | GstE5      | 38    | 75.075  | 8.73  |
| chr2R | 18405886 | 18407240 | GstE6      | 897   | 125.937 | 10.61 |
| chr2R | 18405886 | 18407240 | GstE7      | 16    | 125.937 | 10.61 |
| chr2R | 18407534 | 18408018 | GstE8      | 16    | 7.93136 | 2.79  |
| chr2R | 18409030 | 18409328 | GstE9      | 9     | 9.18791 | 2.81  |
| chr2R | 18411837 | 18413818 | Dp1        | 640   | 316.742 | 26.98 |
| chr2R | 18411837 | 18413818 | imd        | 44    | 316.742 | 26.98 |
| chr2R | 18433552 | 18434290 | CG30118    | 6457  | 13.3268 | 3.26  |
| chr2R | 18435290 | 18435606 | CG30118    | 5047  | 20.34   | 4.32  |
| chr2R | 18439779 | 18440579 | CG30118    | 63    | 30.5855 | 5.12  |
| chr2R | 18440848 | 18441417 | slim       | 192   | 44.3158 | 6.18  |
| chr2R | 18442392 | 18443301 | slim       | 1721  | 227.143 | 16.41 |
| chr2R | 18497733 | 18498370 | CG30116    | 59    | 308.281 | 20.46 |
| chr2R | 18503316 | 18504560 | GstE11     | 34    | 277.896 | 16.78 |
| chr2R | 18514251 | 18515201 | CG43066    | 379   | 53.4733 | 6.46  |
| chr2R | 18517968 | 18518469 | CG43066    | 3670  | 102.066 | 11.90 |
| chr2R | 18528337 | 18529250 | CG10924    | 1520  | 223.126 | 14.05 |
| chr2R | 18536245 | 18536998 | CG45087    | 9     | 70.6231 | 9.25  |
| chr2R | 18536245 | 18536998 | Pepck      | 9     | 70.6231 | 9.25  |
| chr2R | 18583208 | 18583550 | GEFmeso    | 68    | 27.4601 | 5.36  |
| chr2R | 18610982 | 18612175 | GEFmeso    | 70    | 316.742 | 29.19 |
| chr2R | 18621465 | 18621738 | CG5335     | 16    | 13.2204 | 3.41  |
| chr2R | 18638466 | 18639399 | CG30122    | 683   | 14.168  | 3.26  |
| chr2R | 18652533 | 18653297 | SP2637     | 189   | 316.742 | 40.79 |
| chr2R | 18672936 | 18673827 | edl        | 10    | 316.742 | 33.54 |
| chr2R | 18688019 | 18689303 | Sik3       | 403   | 78.2167 | 8.70  |
| chr2R | 18689758 | 18690299 | Sik3       | 1390  | 140.018 | 13.08 |
| chr2R | 18690670 | 18691021 | Sik3       | 2117  | 10.2439 | 3.28  |
| chr2R | 18698008 | 18698580 | CG15071    | 1845  | 19.5823 | 4.48  |
| chr2R | 18717194 | 18718358 | Hs3st-A    | 66    | 176.518 | 16.14 |

|       |          |          |              |       |         |       |
|-------|----------|----------|--------------|-------|---------|-------|
| chr2R | 18754813 | 18755543 | Cyp12b2      | 45    | 197.827 | 13.95 |
| chr2R | 18760606 | 18762046 | Jabba        | 71    | 126.887 | 13.55 |
| chr2R | 18760606 | 18762046 | Mctp         | 604   | 126.887 | 13.55 |
| chr2R | 18766793 | 18767105 | Mctp         | 152   | 12.4721 | 3.34  |
| chr2R | 18770650 | 18771706 | Mctp         | 537   | 64.0229 | 8.96  |
| chr2R | 18776721 | 18777629 | CG15093      | 36    | 61.9837 | 8.77  |
| chr2R | 18799183 | 18799832 | MFS15        | 2763  | 133.947 | 13.77 |
| chr2R | 18800275 | 18800959 | MFS14        | 1860  | 316.742 | 27.26 |
| chr2R | 18801408 | 18803246 | MFS14        | 363   | 316.742 | 31.10 |
| chr2R | 18805847 | 18806798 | CR44468      | 704   | 316.742 | 27.21 |
| chr2R | 18814917 | 18815230 | CR43418      | 129   | 22.3489 | 5.12  |
| chr2R | 18814917 | 18815230 | CG15096      | 47    | 22.3489 | 5.12  |
| chr2R | 18829351 | 18829915 | CG15097      | 35    | 110.572 | 9.48  |
| chr2R | 18834616 | 18835662 | CG15098      | 526   | 47.3942 | 5.95  |
| chr2R | 18834616 | 18835662 | CG15083      | 39    | 47.3942 | 5.95  |
| chr2R | 18846030 | 18846708 | CG15099      | 281   | 273.449 | 16.74 |
| chr2R | 18854902 | 18855637 | Jheh1        | 118   | 30.101  | 4.75  |
| chr2R | 18857751 | 18858163 | Jheh2        | 29    | 55.7713 | 6.47  |
| chr2R | 18877791 | 18878629 | sano         | 345   | 114.707 | 10.63 |
| chr2R | 18947126 | 18947530 | sano         | 18    | 30.2186 | 4.67  |
| chr2R | 18972972 | 18973497 | Topors       | 292   | 137.449 | 11.03 |
| chr2R | 19066899 | 19067299 | 5-HT1A       | 81    | 30.5289 | 5.95  |
| chr2R | 19125723 | 19126460 | CG15117      | 314   | 165.334 | 12.12 |
| chr2R | 19136793 | 19138039 | CG15118      | 472   | 33.9974 | 5.15  |
| chr2R | 19136793 | 19138039 | CG15111      | 270   | 33.9974 | 5.15  |
| chr2R | 19141480 | 19142514 | ena          | 472   | 104.813 | 9.83  |
| chr2R | 19142943 | 19143339 | CR43399      | 1405  | 42.0459 | 6.81  |
| chr2R | 19154010 | 19155533 | ena          | 37    | 316.742 | 27.51 |
| chr2R | 19157417 | 19158073 | ena          | 2354  | 41.1468 | 6.82  |
| chr2R | 19163987 | 19164709 | CG10737      | 42    | 35.8511 | 5.33  |
| chr2R | 19166604 | 19167325 | CG10737      | 2605  | 31.2708 | 5.52  |
| chr2R | 19168961 | 19169279 | CG10737      | 1112  | 19.929  | 4.12  |
| chr2R | 19178532 | 19179450 | hppy         | 464   | 183.216 | 12.36 |
| chr2R | 19191781 | 19192351 | hppy         | 13318 | 26.1416 | 5.58  |
| chr2R | 19226166 | 19226437 | CG7137       | 1042  | 23.4423 | 3.85  |
| chr2R | 19228754 | 19230220 | cora         | 36    | 316.742 | 23.32 |
| chr2R | 19230931 | 19231954 | cora         | 2373  | 316.742 | 22.46 |
| chr2R | 19249468 | 19249758 | wbl          | 161   | 17.3726 | 4.33  |
| chr2R | 19253919 | 19254503 | CG33453      | 1001  | 123.748 | 10.09 |
| chr2R | 19268688 | 19269318 | rib          | 1043  | 105.355 | 9.73  |
| chr2R | 19275290 | 19275883 | rib          | 167   | 227.566 | 16.47 |
| chr2R | 19290001 | 19290544 | FK506-bp2    | 183   | 36.0308 | 5.90  |
| chr2R | 19292582 | 19294074 | Tab2         | 690   | 284.591 | 18.11 |
| chr2R | 19325335 | 19325791 | Rgk1         | 50    | 65.6671 | 9.93  |
| chr2R | 19356134 | 19358555 | Rgk1         | 79    | 107.64  | 10.91 |
| chr2R | 19356134 | 19358555 | CG11961      | 927   | 107.64  | 10.91 |
| chr2R | 19394914 | 19395521 | SdhA         | 813   | 232.981 | 17.12 |
| chr2R | 19411246 | 19411650 | hts          | 42    | 67.4938 | 8.97  |
| chr2R | 19418247 | 19419237 | snoRNA:hts-a | 4479  | 121.565 | 11.57 |
| chr2R | 19423518 | 19425347 | hts          | 106   | 244.642 | 16.80 |
| chr2R | 19423518 | 19425347 | CalpA        | 892   | 244.642 | 16.80 |
| chr2R | 19436643 | 19437199 | Fak          | 208   | 26.2698 | 4.40  |
| chr2R | 19442207 | 19442547 | RpL11        | 13    | 19.2912 | 3.77  |
| chr2R | 19446007 | 19446356 | EloC         | 67    | 14.743  | 3.58  |
| chr2R | 19449394 | 19451779 | betaTub56D   | 201   | 316.742 | 22.52 |
| chr2R | 19455596 | 19457469 | par-1        | 948   | 316.742 | 21.41 |
| chr2R | 19455596 | 19457469 | mei-W68      | 948   | 316.742 | 21.41 |
| chr2R | 19455596 | 19457469 | par-1        | 948   | 316.742 | 21.41 |
| chr2R | 19461381 | 19463947 | par-1        | 607   | 282.664 | 17.87 |
| chr2R | 19466981 | 19469139 | par-1        | 808   | 316.742 | 35.71 |
| chr2R | 19617752 | 19618201 | sm           | 12296 | 11.3812 | 3.20  |
| chr2R | 19618632 | 19618996 | sm           | 11565 | 22.5484 | 4.57  |
| chr2R | 19626573 | 19627107 | sm           | 3613  | 51.0646 | 7.75  |
| chr2R | 19630403 | 19632629 | sm           | 481   | 316.742 | 34.07 |
| chr2R | 19668909 | 19669938 | hrg          | 88    | 27.8904 | 4.51  |
| chr2R | 19691873 | 19692357 | CR44506      | 24    | 27.8127 | 5.07  |
| chr2R | 19825492 | 19826892 | Toll-7       | 102   | 316.742 | 34.68 |
| chr2R | 20007025 | 20007571 | CR44628      | 254   | 90.3966 | 8.94  |
| chr2R | 20106201 | 20106959 | 18w          | 4953  | 316.742 | 44.62 |
| chr2R | 20110596 | 20111758 | 18w          | 265   | 316.742 | 49.80 |
| chr2R | 20119609 | 20119884 | 18w          | 8210  | 12.4007 | 3.38  |
| chr2R | 20245262 | 20245591 | CG11208      | 13    | 20.7834 | 4.35  |
| chr2R | 20257051 | 20257429 | Ate1         | 82    | 21.7866 | 4.25  |
| chr2R | 20263885 | 20264211 | RpS18        | 16    | 14.4217 | 3.42  |
| chr2R | 20274252 | 20274639 | CG10444      | 41    | 51.9797 | 6.01  |

|       |          |          |            |       |         |       |
|-------|----------|----------|------------|-------|---------|-------|
| chr2R | 20274252 | 20274639 | CG11788    | 138   | 51.9797 | 6.01  |
| chr2R | 20307238 | 20307533 | CG11200    | 1025  | 9.31732 | 2.92  |
| chr2R | 20313301 | 20313923 | CG13868    | 21    | 213.138 | 14.66 |
| chr2R | 20319565 | 20320866 | CG8920     | 313   | 316.742 | 36.77 |
| chr2R | 20327198 | 20328042 | CG8929     | 374   | 316.742 | 19.26 |
| chr2R | 20423733 | 20424507 | CG12484    | 123   | 65.9727 | 8.49  |
| chr2R | 20503382 | 20503652 | Obp57c     | 33    | 11.3227 | 3.38  |
| chr2R | 20531218 | 20531939 | CR44651    | 198   | 280.319 | 18.79 |
| chr2R | 20533065 | 20533474 | CG30154    | 100   | 46.2171 | 6.73  |
| chr2R | 20534104 | 20534694 | CG18067    | 107   | 164.151 | 13.26 |
| chr2R | 20581507 | 20583171 | qsm        | 623   | 316.742 | 25.58 |
| chr2R | 20587541 | 20588794 | HnRNP-K    | 527   | 316.742 | 22.36 |
| chr2R | 20595959 | 20596425 | HnRNP-K    | 2213  | 20.986  | 4.96  |
| chr2R | 20613163 | 20613509 | Hil        | 4864  | 23.5235 | 4.98  |
| chr2R | 20617719 | 20618599 | Hil        | 11    | 106.651 | 9.21  |
| chr2R | 20617719 | 20618599 | CG9945     | 296   | 106.651 | 9.21  |
| chr2R | 20646165 | 20646501 | Lrt        | 26    | 27.2721 | 5.25  |
| chr2R | 20654807 | 20655415 | CG16799    | 17    | 140.27  | 13.85 |
| chr2R | 20665532 | 20665941 | Fem-1      | 142   | 43.0566 | 6.18  |
| chr2R | 20666408 | 20667409 | Fem-1      | 616   | 97.2081 | 8.51  |
| chr2R | 20671227 | 20671557 | CG30152    | 143   | 11.0655 | 2.74  |
| chr2R | 20697810 | 20698651 | dpr1       | 73    | 50.4129 | 8.40  |
| chr2R | 20808949 | 20809207 | CG15225    | 16126 | 17.8465 | 4.59  |
| chr2R | 20830386 | 20830746 | sktl       | 1902  | 17.5204 | 3.60  |
| chr2R | 20831661 | 20832541 | sktl       | 507   | 126.593 | 10.62 |
| chr2R | 20835773 | 20836695 | sktl       | 56    | 316.742 | 21.35 |
| chr2R | 20835773 | 20836695 | insc       | 56    | 316.742 | 21.35 |
| chr2R | 20869141 | 20869502 | IM4        | 38    | 21.8908 | 4.33  |
| chr2R | 20870201 | 20870741 | IM14       | 55    | 11.3812 | 3.20  |
| chr2R | 20884435 | 20884826 | Cib2       | 4727  | 45.5018 | 5.73  |
| chr2R | 20903363 | 20903942 | otp        | 245   | 225.331 | 17.97 |
| chr2R | 20913850 | 20914607 | Rx         | 2485  | 133.27  | 13.39 |
| chr2R | 20916164 | 20916846 | Rx         | 75    | 30.8834 | 5.68  |
| chr2R | 20935172 | 20935452 | Act57B     | 8644  | 9.14346 | 3.15  |
| chr2R | 20938091 | 20938525 | Act57B     | 5798  | 35.2316 | 5.82  |
| chr2R | 20960907 | 20961411 | hbn        | 254   | 52.4802 | 7.63  |
| chr2R | 20963228 | 20963651 | hbn        | 2466  | 23.5869 | 4.85  |
| chr2R | 20975318 | 20975583 | CG34115    | 42    | 25.4009 | 5.41  |
| chr2R | 20996206 | 20999572 | CG10543    | 1502  | 316.742 | 19.35 |
| chr2R | 20999969 | 21000918 | CG10543    | 243   | 316.742 | 29.58 |
| chr2R | 21047643 | 21048425 | shg        | 9305  | 210.658 | 16.12 |
| chr2R | 21056360 | 21057315 | shg        | 358   | 150.052 | 11.39 |
| chr2R | 21057690 | 21057947 | cpa        | 6     | 10.6309 | 3.04  |
| chr2R | 21072493 | 21073155 | CG10527    | 72    | 316.742 | 18.86 |
| chr2R | 21073660 | 21074137 | Treh       | 46    | 15.9182 | 3.71  |
| chr2R | 21075160 | 21077120 | Treh       | 355   | 316.742 | 23.52 |
| chr2R | 21084194 | 21084525 | Treh       | 50    | 13.8647 | 3.36  |
| chr2R | 21101539 | 21102114 | ktub       | 129   | 143.014 | 15.65 |
| chr2R | 21125336 | 21125600 | CG4050     | 2116  | 10.5548 | 3.15  |
| chr2R | 21126135 | 21126695 | CG4050     | 1161  | 47.0783 | 6.81  |
| chr2R | 21127475 | 21128535 | CG4050     | 433   | 197.012 | 12.59 |
| chr2R | 21141780 | 21142345 | Magi       | 22    | 59.5991 | 7.82  |
| chr2R | 21143490 | 21144317 | Xbp1       | 142   | 52.6004 | 5.82  |
| chr2R | 21158366 | 21158761 | CG30389    | 595   | 21.7477 | 4.67  |
| chr2R | 21159708 | 21160506 | CG30389    | 460   | 45.2997 | 5.88  |
| chr2R | 21174925 | 21175509 | Pu         | 113   | 316.742 | 30.16 |
| chr2R | 21176866 | 21177125 | CG4286     | 1684  | 15.011  | 3.85  |
| chr2R | 21178701 | 21179473 | Pu         | 44    | 316.742 | 24.57 |
| chr2R | 21180720 | 21181249 | Pu         | 1988  | 27.5095 | 4.76  |
| chr2R | 21193296 | 21193598 | Lapsyn     | 129   | 20.3795 | 4.66  |
| chr2R | 21199537 | 21201547 | CG44245    | 556   | 277.377 | 15.99 |
| chr2R | 21199537 | 21201547 | Glycogenin | 556   | 277.377 | 15.99 |
| chr2R | 21202612 | 21203024 | Glycogenin | 554   | 91.0529 | 9.55  |
| chr2R | 21214868 | 21215178 | CG4302     | 1     | 22.7936 | 4.90  |
| chr2R | 21234729 | 21235066 | ASPP       | 11086 | 20.0809 | 4.45  |
| chr2R | 21248710 | 21251726 | ASPP       | 21    | 316.742 | 26.71 |
| chr2R | 21293580 | 21293899 | Sgf29      | 94    | 32.3271 | 5.23  |
| chr2R | 21293580 | 21293899 | RpL29      | 27    | 32.3271 | 5.23  |
| chr2R | 21295578 | 21296097 | CG9752     | 113   | 9.34759 | 2.74  |
| chr2R | 21295578 | 21296097 | CG42672    | 50    | 9.34759 | 2.74  |
| chr2R | 21323245 | 21323852 | CG30394    | 299   | 33.2377 | 4.72  |
| chr2R | 21323245 | 21323852 | dom        | 190   | 33.2377 | 4.72  |
| chr2R | 21361896 | 21363349 | CG17974    | 12238 | 115.633 | 10.41 |
| chr2R | 21365468 | 21365799 | cv-2       | 13855 | 22.3172 | 4.95  |
| chr2R | 21379153 | 21379729 | cv-2       | 4     | 276.308 | 17.60 |

|       |          |          |              |      |         |       |
|-------|----------|----------|--------------|------|---------|-------|
| chr2R | 21386474 | 21386848 | Acox57D-p    | 20   | 25.0252 | 4.67  |
| chr2R | 21389225 | 21389500 | Acox57D-d    | 62   | 16.8016 | 3.79  |
| chr2R | 21416925 | 21417207 | Sdc          | 0    | 15.7254 | 3.83  |
| chr2R | 21474994 | 21477104 | Sdc          | 4285 | 71.0245 | 7.55  |
| chr2R | 21480417 | 21481259 | Sdc          | 297  | 316.742 | 23.49 |
| chr2R | 21496597 | 21497860 | Fkbp14       | 323  | 316.742 | 31.29 |
| chr2R | 21501910 | 21503340 | MESK2        | 587  | 294.166 | 19.61 |
| chr2R | 21505911 | 21506566 | MESK2        | 258  | 18.8597 | 4.14  |
| chr2R | 21522150 | 21523078 | Egfr         | 95   | 127.901 | 9.72  |
| chr2R | 21535440 | 21535769 | CG30286      | 1181 | 41.3129 | 5.89  |
| chr2R | 21540937 | 21541618 | CG30283      | 710  | 316.742 | 28.22 |
| chr2R | 21545233 | 21547494 | Egfr         | 161  | 316.742 | 29.79 |
| chr2R | 21549910 | 21550751 | Egfr         | 3769 | 275.507 | 19.33 |
| chr2R | 21552448 | 21553210 | Egfr         | 6178 | 140.435 | 15.29 |
| chr2R | 21563825 | 21564269 | twz          | 7451 | 43.2363 | 6.36  |
| chr2R | 21571381 | 21571755 | twz          | 88   | 22.8708 | 4.77  |
| chr2R | 21606656 | 21607396 | CG10433      | 86   | 316.742 | 38.77 |
| chr2R | 21611707 | 21612098 | CG15673      | 1161 | 13.0667 | 3.21  |
| chr2R | 21612756 | 21613390 | CG15673      | 36   | 198.449 | 15.96 |
| chr2R | 21624029 | 21624455 | PTP-ER       | 227  | 31.7954 | 5.40  |
| chr2R | 21634557 | 21635218 | CG10321      | 17   | 47.8446 | 6.07  |
| chr2R | 21645429 | 21647108 | CG10082      | 68   | 316.742 | 24.26 |
| chr2R | 21649007 | 21649497 | CG30284      | 2551 | 9.00951 | 2.93  |
| chr2R | 21661969 | 21662523 | pirk         | 12   | 89.9897 | 9.86  |
| chr2R | 21663057 | 21663521 | CR44748      | 46   | 18.1042 | 3.66  |
| chr2R | 21669848 | 21670244 | CG9865       | 139  | 12.5161 | 3.07  |
| chr2R | 21669848 | 21670244 | CG42379      | 139  | 12.5161 | 3.07  |
| chr2R | 21669848 | 21670244 | CG42380      | 139  | 12.5161 | 3.07  |
| chr2R | 21669848 | 21670244 | CG42381      | 139  | 12.5161 | 3.07  |
| chr2R | 21669848 | 21670244 | CG9865       | 139  | 12.5161 | 3.07  |
| chr2R | 21669848 | 21670244 | NC2alpha     | 96   | 12.5161 | 3.07  |
| chr2R | 21688083 | 21689027 | CG30285      | 49   | 296.886 | 18.82 |
| chr2R | 21688083 | 21689027 | CG10307      | 276  | 296.886 | 18.82 |
| chr2R | 21690824 | 21691161 | Tim10        | 216  | 17.5689 | 3.83  |
| chr2R | 21690824 | 21691161 | CG42497      | 216  | 17.5689 | 3.83  |
| chr2R | 21690824 | 21691161 | Tim10        | 216  | 17.5689 | 3.83  |
| chr2R | 21700282 | 21701965 | HmgD         | 66   | 77.28   | 8.00  |
| chr2R | 21702511 | 21705095 | HmgZ         | 262  | 294.296 | 17.17 |
| chr2R | 21705786 | 21706377 | HmgZ         | 1531 | 108.425 | 9.75  |
| chr2R | 21706737 | 21707243 | HmgZ         | 872  | 31.5094 | 5.35  |
| chr2R | 21709151 | 21709839 | CR44749      | 24   | 316.742 | 22.74 |
| chr2R | 21711540 | 21712246 | CG30403      | 370  | 28.0489 | 4.74  |
| chr2R | 21712955 | 21715018 | HmgD         | 86   | 316.742 | 26.95 |
| chr2R | 21720307 | 21720953 | LBR          | 76   | 211.454 | 18.48 |
| chr2R | 21871554 | 21872231 | Fili         | 242  | 149.454 | 10.63 |
| chr2R | 22039183 | 22039932 | CG34370      | 112  | 90.2834 | 10.79 |
| chr2R | 22058923 | 22059187 | CG13500      | 1397 | 24.4843 | 4.70  |
| chr2R | 22060791 | 22061182 | Snp          | 13   | 24.1572 | 3.91  |
| chr2R | 22075903 | 22076243 | GlcT-1       | 42   | 15.5373 | 3.46  |
| chr2R | 22080009 | 22080718 | Synj         | 17   | 316.742 | 18.98 |
| chr2R | 22099128 | 22099769 | CG11073      | 71   | 127.512 | 11.37 |
| chr2R | 22109016 | 22109298 | Vrp1         | 3618 | 20.2385 | 4.36  |
| chr2R | 22116155 | 22116662 | Vrp1         | 73   | 130.452 | 11.23 |
| chr2R | 22119460 | 22120070 | mei-S332     | 2537 | 10.4012 | 3.03  |
| chr2R | 22122282 | 22122570 | Vrp1         | 164  | 10.5547 | 2.76  |
| chr2R | 22136664 | 22137250 | a            | 30   | 316.742 | 47.02 |
| chr2R | 22179372 | 22180667 | CG11275      | 51   | 219.099 | 14.93 |
| chr2R | 22193164 | 22193461 | Swim         | 162  | 22.3464 | 5.03  |
| chr2R | 22212590 | 22213546 | ari-2        | 230  | 159.057 | 13.79 |
| chr2R | 22241832 | 22244202 | dve          | 1726 | 316.742 | 33.59 |
| chr2R | 22270388 | 22271183 | dve          | 146  | 316.742 | 31.14 |
| chr2R | 22271528 | 22271941 | dve          | 773  | 22.0982 | 5.06  |
| chr2R | 22302432 | 22302772 | wdp          | 1186 | 13.7502 | 3.68  |
| chr2R | 22311674 | 22312426 | wdp          | 96   | 316.742 | 28.19 |
| chr2R | 22317485 | 22318924 | Gp150        | 62   | 154.421 | 11.77 |
| chr2R | 22323329 | 22324514 | Gp150        | 738  | 24.0577 | 4.61  |
| chr2R | 22354427 | 22355057 | Liprin-gamma | 47   | 94.2794 | 10.93 |
| chr2R | 22372800 | 22374096 | Liprin-gamma | 199  | 316.742 | 31.35 |
| chr2R | 22382679 | 22383478 | CG13506      | 117  | 316.742 | 44.72 |
| chr2R | 22401909 | 22402334 | babos        | 66   | 44.6026 | 6.86  |
| chr2R | 22403265 | 22404294 | CG6044       | 580  | 249.519 | 21.16 |
| chr2R | 22426728 | 22427078 | CG10344      | 64   | 25.328  | 4.35  |
| chr2R | 22454587 | 22454936 | CG10384      | 14   | 20.8799 | 4.85  |
| chr2R | 22478131 | 22478620 | CG4752       | 8    | 48.1198 | 7.17  |
| chr2R | 22513887 | 22514999 | px           | 341  | 182.421 | 15.93 |

|       |          |          |            |       |         |       |
|-------|----------|----------|------------|-------|---------|-------|
| chr2R | 22519795 | 22521676 | px         | 7280  | 67.4883 | 9.67  |
| chr2R | 22546262 | 22546994 | px         | 4     | 43.8403 | 6.47  |
| chr2R | 22561718 | 22562109 | px         | 91    | 24.9393 | 4.49  |
| chr2R | 22569509 | 22571123 | CG11362    | 7526  | 316.742 | 34.51 |
| chr2R | 22571598 | 22572159 | CG11362    | 9606  | 138.158 | 11.75 |
| chr2R | 22576874 | 22577274 | CG11362    | 14724 | 12.1308 | 3.77  |
| chr2R | 22592678 | 22593460 | dnr1       | 13    | 316.742 | 25.66 |
| chr2R | 22606015 | 22606318 | RpS16      | 40    | 16.1194 | 3.56  |
| chr2R | 22614173 | 22614602 | CG33143    | 41    | 39.3398 | 6.73  |
| chr2R | 22646010 | 22646479 | CG2852     | 61    | 22.7232 | 4.31  |
| chr2R | 22649236 | 22649967 | CG3746     | 28    | 27.304  | 5.86  |
| chr2R | 22666985 | 22667469 | CG30273    | 36    | 30.5536 | 5.38  |
| chr2R | 22666985 | 22667469 | CG30269    | 36    | 30.5536 | 5.38  |
| chr2R | 22669167 | 22669625 | CG13516    | 30    | 99.9817 | 8.72  |
| chr2R | 22670627 | 22671030 | RYBP       | 53    | 18.1042 | 3.66  |
| chr2R | 22676267 | 22677384 | CR44761    | 3368  | 55.6727 | 7.23  |
| chr2R | 22678002 | 22679095 | CR44761    | 4916  | 316.742 | 37.96 |
| chr2R | 22680880 | 22681255 | CR44761    | 7331  | 38.5336 | 6.30  |
| chr2R | 22683114 | 22683860 | Ppa        | 5417  | 49.45   | 7.34  |
| chr2R | 22685674 | 22687236 | Ppa        | 2992  | 316.742 | 20.87 |
| chr2R | 22688396 | 22690044 | Ppa        | 93    | 316.742 | 31.41 |
| chr2R | 22688396 | 22690044 | CR44762    | 14    | 316.742 | 31.41 |
| chr2R | 22688396 | 22690044 | CR44763    | 414   | 316.742 | 31.41 |
| chr2R | 22700485 | 22701126 | robo1      | 49    | 53.7436 | 8.20  |
| chr2R | 22728944 | 22729691 | jbug       | 72    | 316.742 | 63.16 |
| chr2R | 22729975 | 22730234 | jbug       | 824   | 11.4179 | 3.58  |
| chr2R | 22736674 | 22737493 | jbug       | 58    | 316.742 | 21.27 |
| chr2R | 22740185 | 22740924 | jbug       | 82    | 190.983 | 13.20 |
| chr2R | 22796838 | 22797243 | CG42260    | 1275  | 52.1778 | 7.30  |
| chr2R | 22798169 | 22798587 | CG42260    | 154   | 22.6627 | 3.81  |
| chr2R | 22799005 | 22799726 | blw        | 545   | 11.1351 | 2.89  |
| chr2R | 22854206 | 22854558 | RpL23      | 38    | 8.38578 | 2.56  |
| chr2R | 22860074 | 22860503 | inaD       | 1515  | 28.9159 | 5.77  |
| chr2R | 22867584 | 22868032 | fd59A      | 301   | 42.6774 | 7.14  |
| chr2R | 22874577 | 22874979 | PIP5K59B   | 50    | 17.4341 | 4.57  |
| chr2R | 22894211 | 22894750 | CG3700     | 23    | 316.742 | 22.47 |
| chr2R | 22895910 | 22896594 | nahoda     | 22    | 316.742 | 26.15 |
| chr2R | 22901541 | 22902265 | nahoda     | 5747  | 8.525   | 2.74  |
| chr2R | 22924736 | 22925340 | Nup214     | 402   | 25.5623 | 4.49  |
| chr2R | 22924736 | 22925340 | Reep1      | 38    | 25.5623 | 4.49  |
| chr2R | 22926118 | 22926981 | Reep1      | 7     | 186.828 | 15.26 |
| chr2R | 22933621 | 22934944 | CG3788     | 280   | 316.742 | 31.85 |
| chr2R | 22936586 | 22937132 | CG3800     | 52    | 8.75696 | 2.63  |
| chr2R | 22940760 | 22941376 | CG3831     | 23    | 24.1684 | 5.13  |
| chr2R | 22998614 | 22999038 | CG9896     | 34    | 38.8965 | 5.57  |
| chr2R | 23042743 | 23043491 | CG42741    | 152   | 70.5886 | 8.18  |
| chr2R | 23054912 | 23055238 | CG44252    | 399   | 11.0587 | 3.55  |
| chr2R | 23067282 | 23067768 | l(2)k09913 | 229   | 9.77495 | 2.62  |
| chr2R | 23203753 | 23204210 | CG34371    | 14    | 89.947  | 8.49  |
| chr2R | 23328037 | 23328420 | tbrd-3     | 706   | 28.5455 | 5.43  |
| chr2R | 23376693 | 23377056 | Golgin245  | 217   | 26.1113 | 4.64  |
| chr2R | 23395206 | 23395578 | CG3530     | 2     | 48.9415 | 7.63  |
| chr2R | 23395900 | 23396679 | CG3530     | 483   | 9.9796  | 2.74  |
| chr2R | 23419229 | 23419836 | CG9812     | 9     | 48.7559 | 5.69  |
| chr2R | 23425729 | 23426825 | CG9815     | 97    | 316.742 | 26.87 |
| chr2R | 23427301 | 23427759 | CG9815     | 1424  | 11.6945 | 3.14  |
| chr2R | 23428685 | 23429021 | CG9815     | 2840  | 26.7911 | 4.53  |
| chr2R | 23431935 | 23432675 | CG9815     | 320   | 85.9513 | 10.69 |
| chr2R | 23443745 | 23444306 | CG43795    | 174   | 53.3608 | 8.71  |
| chr2R | 23523289 | 23523950 | RabX1      | 224   | 19.0512 | 3.82  |
| chr2R | 23523289 | 23523950 | mi         | 18    | 19.0512 | 3.82  |
| chr2R | 23547590 | 23548354 | wmd        | 45    | 18.0413 | 3.39  |
| chr2R | 23547590 | 23548354 | levy       | 205   | 18.0413 | 3.39  |
| chr2R | 23551245 | 23551995 | Dcp-1      | 229   | 41.4703 | 5.73  |
| chr2R | 23551245 | 23551995 | pita       | 10    | 41.4703 | 5.73  |
| chr2R | 23566971 | 23567343 | apt        | 919   | 15.298  | 3.98  |
| chr2R | 23569812 | 23570480 | apt        | 1955  | 91.0129 | 9.83  |
| chr2R | 23573051 | 23573700 | apt        | 5240  | 95.0124 | 12.12 |
| chr2R | 23580049 | 23581347 | apt        | 301   | 316.742 | 43.49 |
| chr2R | 23614666 | 23615034 | CG4019     | 125   | 23.514  | 4.63  |
| chr2R | 23621322 | 23621792 | CG17664    | 4806  | 73.0528 | 10.63 |
| chr2R | 23632115 | 23632592 | retn       | 233   | 90.4961 | 8.21  |
| chr2R | 23652345 | 23652638 | Pde8       | 5061  | 23.6142 | 4.21  |
| chr2R | 23657110 | 23657703 | Pde8       | 6     | 13.5553 | 3.75  |
| chr2R | 23658916 | 23660212 | Pde8       | 92    | 316.742 | 42.60 |

|       |          |          |                   |      |         |       |
|-------|----------|----------|-------------------|------|---------|-------|
| chr2R | 23666239 | 23668053 | Pde8              | 158  | 316.742 | 53.60 |
| chr2R | 23671690 | 23672876 | Pde8              | 170  | 69.0167 | 8.09  |
| chr2R | 23683079 | 23683645 | St3               | 26   | 186.499 | 14.02 |
| chr2R | 23687450 | 23687843 | Pal2              | 412  | 12.7061 | 3.73  |
| chr2R | 23697490 | 23698389 | CG30183           | 26   | 179.198 | 11.76 |
| chr2R | 23697490 | 23698389 | mRpl43            | 254  | 179.198 | 11.76 |
| chr2R | 23706926 | 23707286 | l(2)tid           | 36   | 31.3675 | 5.07  |
| chr2R | 23711974 | 23714241 | Sesn              | 390  | 316.742 | 23.81 |
| chr2R | 23725132 | 23726212 | CR45325           | 4969 | 74.327  | 8.61  |
| chr2R | 23726960 | 23727548 | CR45325           | 6114 | 22.809  | 4.18  |
| chr2R | 23744501 | 23745231 | egl               | 315  | 22.0066 | 4.41  |
| chr2R | 23745942 | 23746919 | egl               | 138  | 31.3435 | 4.79  |
| chr2R | 23782843 | 23783111 | CG15800           | 8303 | 12.3507 | 3.76  |
| chr2R | 23796248 | 23796739 | CG9850            | 1879 | 123.778 | 9.80  |
| chr2R | 23797785 | 23798613 | CG9850            | 84   | 15.2882 | 3.79  |
| chr2R | 23817956 | 23820592 | CG4797            | 1927 | 57.4883 | 7.81  |
| chr2R | 23817956 | 23820592 | CG5549            | 99   | 57.4883 | 7.81  |
| chr2R | 23826950 | 23827525 | CG4763            | 2429 | 12.5224 | 3.68  |
| chr2R | 23839909 | 23840276 | snoRNA:Psi18S-176 | 62   | 43.9234 | 5.51  |
| chr2R | 23862127 | 23862544 | TBPH              | 76   | 7.71759 | 2.67  |
| chr2R | 23864862 | 23865394 | CG4585            | 495  | 5.57776 | 2.21  |
| chr2R | 23870096 | 23870827 | ken               | 122  | 316.742 | 20.74 |
| chr2R | 23871372 | 23874223 | ken               | 1723 | 316.742 | 27.19 |
| chr2R | 23909995 | 23910649 | kcc               | 17   | 121.988 | 10.86 |
| chr2R | 23932363 | 23933790 | SERCA             | 23   | 18.1713 | 3.59  |
| chr2R | 23940258 | 23940641 | Taldo             | 28   | 19.9971 | 3.94  |
| chr2R | 23977802 | 23980210 | Sox14             | 133  | 316.742 | 17.56 |
| chr2R | 23982047 | 23982590 | Sox14             | 2477 | 13.9685 | 3.67  |
| chr2R | 23988303 | 23988592 | Phm               | 33   | 13.0059 | 3.20  |
| chr2R | 23994732 | 23995339 | CG3860            | 71   | 76.3037 | 7.59  |
| chr2R | 24021721 | 24022132 | CG3907            | 272  | 24.1126 | 4.29  |
| chr2R | 24026090 | 24026905 | EbpIII            | 47   | 83.2666 | 9.43  |
| chr2R | 24033678 | 24034034 | Chi               | 62   | 15.2491 | 3.41  |
| chr2R | 24033678 | 24034034 | MAN1              | 92   | 15.2491 | 3.41  |
| chr2R | 24045405 | 24045842 | tsr               | 1324 | 6.73657 | 2.33  |
| chr2R | 24046225 | 24046925 | tsr               | 50   | 14.9988 | 3.53  |
| chr2R | 24116546 | 24116839 | CG3257            | 57   | 20.6205 | 4.00  |
| chr2R | 24131171 | 24131853 | tamo              | 286  | 302.147 | 21.28 |
| chr2R | 24133106 | 24134047 | tamo              | 43   | 31.8561 | 4.62  |
| chr2R | 24133106 | 24134047 | Zfrp8             | 480  | 31.8561 | 4.62  |
| chr2R | 24138752 | 24139643 | Dat               | 575  | 61.2192 | 8.11  |
| chr2R | 24145900 | 24146241 | Dat               | 790  | 12.2707 | 3.40  |
| chr2R | 24146575 | 24147108 | Dat               | 42   | 273.442 | 26.02 |
| chr2R | 24156341 | 24156658 | DnaJ-60           | 2740 | 9.48323 | 3.04  |
| chr2R | 24156341 | 24156658 | CG42568           | 2740 | 9.48323 | 3.04  |
| chr2R | 24156341 | 24156658 | DnaJ-60           | 2740 | 9.48323 | 3.04  |
| chr2R | 24161776 | 24162924 | CG3328            | 8    | 316.742 | 22.37 |
| chr2R | 24197696 | 24197967 | CG3356            | 12   | 13.91   | 3.21  |
| chr2R | 24229606 | 24230104 | CG30419           | 75   | 60.6096 | 8.50  |
| chr2R | 24257773 | 24258132 | CG3376            | 32   | 29.3863 | 4.97  |
| chr2R | 24275432 | 24276103 | navy              | 128  | 28.5196 | 5.77  |
| chr2R | 24291170 | 24291552 | CG3394            | 2797 | 19.4026 | 4.37  |
| chr2R | 24293237 | 24294909 | CG3394            | 62   | 316.742 | 35.12 |
| chr2R | 24293237 | 24294909 | mir-4985          | 196  | 316.742 | 35.12 |
| chr2R | 24342440 | 24343052 | bs                | 88   | 245.348 | 16.68 |
| chr2R | 24366383 | 24366849 | CR44811           | 3059 | 23.514  | 4.63  |
| chr2R | 24369466 | 24370207 | CR44811           | 89   | 316.742 | 24.03 |
| chr2R | 24388759 | 24390633 | mAChR-A           | 672  | 316.742 | 23.99 |
| chr2R | 24401590 | 24403142 | Slik              | 465  | 113.456 | 10.10 |
| chr2R | 24401590 | 24403142 | Rpn8              | 1085 | 113.456 | 10.10 |
| chr2R | 24514420 | 24515137 | Letm1             | 93   | 10.3923 | 2.82  |
| chr2R | 24525591 | 24526281 | CG4612            | 272  | 133.494 | 11.20 |
| chr2R | 24525591 | 24526281 | Brca2             | 354  | 133.494 | 11.20 |
| chr2R | 24531454 | 24532487 | CG13585           | 32   | 52.6981 | 7.31  |
| chr2R | 24537921 | 24539232 | ITP               | 1631 | 24.0583 | 4.95  |
| chr2R | 24543336 | 24543843 | ITP               | 86   | 153.022 | 14.01 |
| chr2R | 24547559 | 24547837 | ITP               | 4065 | 12.5022 | 3.45  |
| chr2R | 24549432 | 24550182 | ITP               | 6083 | 25.4581 | 4.75  |
| chr2R | 24550650 | 24551405 | CG4622            | 5194 | 126.246 | 12.67 |
| chr2R | 24571045 | 24571804 | CG3511            | 285  | 92.0504 | 8.48  |
| chr2R | 24571045 | 24571804 | Fcp1              | 319  | 92.0504 | 8.48  |
| chr2R | 24580826 | 24581643 | pio               | 87   | 258.76  | 18.29 |
| chr2R | 24587400 | 24587779 | pio               | 123  | 10.9047 | 3.34  |
| chr2R | 24599534 | 24600243 | ATPsynF           | 5    | 25.0005 | 3.92  |
| chr2R | 24599534 | 24600243 | CG3548            | 130  | 25.0005 | 3.92  |



|       |          |          |          |       |         |       |
|-------|----------|----------|----------|-------|---------|-------|
| chr2R | 24606947 | 24607257 | CG4707   | 4     | 11.4666 | 3.02  |
| chr2R | 24620899 | 24621464 | CG4741   | 5904  | 33.9361 | 6.06  |
| chr2R | 24630808 | 24631366 | Cyp9c1   | 9     | 297.631 | 19.97 |
| chr2R | 24638408 | 24638806 | CG13594  | 27    | 36.5313 | 6.93  |
| chr2R | 24684885 | 24685573 | Mmp1     | 24    | 102.729 | 9.00  |
| chr2R | 24687334 | 24688274 | Mmp1     | 178   | 77.6321 | 8.36  |
| chr2R | 24694079 | 24694380 | ST6Gal   | 305   | 5.66044 | 2.20  |
| chr2R | 24712474 | 24713413 | ST6Gal   | 18524 | 225.551 | 21.09 |
| chr2R | 24727259 | 24727916 | Mid1     | 8961  | 130.966 | 15.59 |
| chr2R | 24736441 | 24737000 | Mid1     | 88    | 86.9516 | 9.55  |
| chr2R | 24739262 | 24739685 | CR44828  | 57    | 26.9859 | 5.42  |
| chr2R | 24743706 | 24744512 | Usp15-31 | 481   | 109.429 | 9.88  |
| chr2R | 24747883 | 24748368 | Usp15-31 | 4488  | 23.9546 | 4.79  |
| chr2R | 24749446 | 24750197 | Usp15-31 | 6006  | 201.054 | 14.87 |
| chr2R | 24757133 | 24757466 | spz6     | 66    | 14.1049 | 3.76  |
| chr2R | 24765916 | 24766345 | GstE12   | 1478  | 15.0172 | 3.58  |
| chr2R | 24767314 | 24768612 | GstE12   | 68    | 316.742 | 42.33 |
| chr2R | 24793022 | 24794049 | Reg-5    | 59    | 316.742 | 38.32 |
| chr2R | 24793022 | 24794049 | CR43257  | 337   | 316.742 | 38.32 |
| chr2R | 24813340 | 24814998 | DII      | 998   | 316.742 | 28.00 |
| chr2R | 24823668 | 24824056 | DII      | 9047  | 40.9846 | 7.41  |
| chr2R | 24829522 | 24829863 | DII      | 14905 | 25.0042 | 5.32  |
| chr2R | 24860281 | 24860704 | CR44829  | 1216  | 14.8275 | 3.75  |
| chr2R | 24863672 | 24863961 | CR44829  | 4507  | 9.94473 | 3.26  |
| chr2R | 24874706 | 24875064 | CG16896  | 34    | 27.1759 | 4.26  |
| chr2R | 24876241 | 24876816 | CG44247  | 234   | 24.6023 | 4.60  |
| chr2R | 24881584 | 24882973 | CR43466  | 840   | 95.5526 | 8.95  |
| chr2R | 24881584 | 24882973 | NKAIN    | 189   | 95.5526 | 8.95  |
| chr2R | 24891268 | 24892151 | NaCP60E  | 126   | 62.4538 | 8.87  |
| chr2R | 24903156 | 24904135 | RpL41    | 559   | 28.754  | 4.80  |
| chr2R | 24903156 | 24904135 | NaCP60E  | 740   | 28.754  | 4.80  |
| chr2R | 24927099 | 24927481 | pain     | 1029  | 15.9801 | 3.94  |
| chr2R | 24928045 | 24928417 | pain     | 29    | 23.4933 | 4.06  |
| chr2R | 24937268 | 24937594 | CG30427  | 76    | 25.8836 | 4.66  |
| chr2R | 24940258 | 24940580 | CG2811   | 24    | 19.7879 | 3.69  |
| chr2R | 24942157 | 24943429 | Tina-1   | 767   | 266.339 | 16.87 |
| chr2R | 24948320 | 24948800 | CG2790   | 173   | 11.2832 | 2.82  |
| chr2R | 24948320 | 24948800 | CG12851  | 93    | 11.2832 | 2.82  |
| chr2R | 24962389 | 24962853 | CG2765   | 10    | 21.6922 | 4.18  |
| chr2R | 24963213 | 24965313 | CG2765   | 664   | 315.505 | 21.23 |
| chr2R | 24969361 | 24969982 | RpL19    | 4     | 7.00964 | 2.23  |
| chr2R | 24969361 | 24969982 | CG3776   | 126   | 7.00964 | 2.23  |
| chr2R | 24971709 | 24972090 | Phk-3    | 54    | 50.9627 | 7.35  |
| chr2R | 24979530 | 24979909 | emp      | 1353  | 7.78566 | 2.47  |
| chr2R | 24982876 | 24983653 | emp      | 90    | 61.0288 | 7.89  |
| chr2R | 24985804 | 24987326 | CG3829   | 900   | 316.742 | 21.96 |
| chr2R | 24985804 | 24987326 | emp      | 873   | 316.742 | 21.96 |
| chr2R | 25010468 | 25011527 | zip      | 443   | 177.695 | 13.34 |
| chr2R | 25011951 | 25012280 | zip      | 140   | 23.3473 | 4.12  |
| chr2R | 25011951 | 25012280 | uzip     | 44    | 23.3473 | 4.12  |
| chr2R | 25031775 | 25032599 | Nplp1    | 51    | 101.641 | 10.99 |
| chr2R | 25052228 | 25052778 | gsb-n    | 154   | 57.6512 | 8.80  |
| chr2R | 25061549 | 25062065 | gsb      | 149   | 224.04  | 19.48 |
| chr2R | 25084087 | 25084674 | gol      | 43    | 148.303 | 10.04 |
| chr2R | 25099699 | 25100732 | lov      | 952   | 21.3548 | 5.05  |
| chr2R | 25114257 | 25114571 | CG30430  | 15016 | 38.4295 | 7.15  |
| chr2R | 25115289 | 25115846 | CG30430  | 13859 | 77.9997 | 8.94  |
| chr2R | 25215030 | 25215516 | Kr       | 11324 | 53.9056 | 7.10  |
| chr2R | 25279662 | 25280231 | CG9380   | 24587 | 94.0675 | 12.52 |
| chr2R | 25285105 | 25285976 | CG9380   | 30308 | 271.254 | 15.01 |
| chr3L | 39962    | 40846    | CG43149  | 14289 | 193.462 | 13.87 |
| chr3L | 128249   | 129942   | Pdk1     | 39    | 316.742 | 28.07 |
| chr3L | 130823   | 132782   | CR45805  | 97    | 316.742 | 32.86 |
| chr3L | 130823   | 132782   | Pdk1     | 337   | 316.742 | 32.86 |
| chr3L | 140688   | 141460   | Pdk1     | 66    | 316.742 | 29.71 |
| chr3L | 152632   | 152893   | p130CAS  | 128   | 22.6806 | 5.20  |
| chr3L | 160651   | 161066   | p130CAS  | 8     | 48.0535 | 6.58  |
| chr3L | 166058   | 166817   | p130CAS  | 5116  | 20.4405 | 4.01  |
| chr3L | 178366   | 179162   | Vdup1    | 29    | 316.742 | 20.06 |
| chr3L | 179819   | 180574   | CG13875  | 86    | 316.742 | 21.02 |
| chr3L | 199039   | 199812   | rno      | 445   | 82.7421 | 6.78  |
| chr3L | 203647   | 204316   | NitFhit  | 313   | 61.5834 | 7.72  |
| chr3L | 205533   | 206202   | Gyk      | 49    | 46.579  | 6.41  |
| chr3L | 205533   | 206202   | CG13876  | 373   | 46.579  | 6.41  |
| chr3L | 222986   | 223241   | pyx      | 1     | 14.834  | 3.55  |

|       |         |         |                   |       |         |       |
|-------|---------|---------|-------------------|-------|---------|-------|
| chr3L | 223839  | 225490  | CG33229           | 53    | 200.73  | 13.86 |
| chr3L | 223839  | 225490  | CR42862           | 53    | 200.73  | 13.86 |
| chr3L | 246420  | 247114  | E(bx)             | 52    | 21.2997 | 3.84  |
| chr3L | 262674  | 263154  | snoRNA:Psi18S-996 | 825   | 11.0211 | 2.81  |
| chr3L | 263817  | 264542  | Tudor-SN          | 43    | 25.4402 | 4.41  |
| chr3L | 267456  | 267922  | miple1            | 100   | 72.2204 | 8.62  |
| chr3L | 270864  | 272032  | miple2            | 33    | 213.97  | 14.57 |
| chr3L | 277087  | 277693  | RhoGEF3           | 74    | 84.5995 | 9.56  |
| chr3L | 282186  | 282639  | RhoGEF3           | 4945  | 36.6169 | 5.27  |
| chr3L | 291748  | 292858  | RhoGEF3           | 268   | 23.665  | 4.37  |
| chr3L | 311444  | 312014  | fwd               | 98    | 80.2248 | 7.70  |
| chr3L | 315078  | 315405  | CG34264           | 1857  | 26.9727 | 4.91  |
| chr3L | 319072  | 320041  | fwd               | 48    | 38.2324 | 5.09  |
| chr3L | 332071  | 332441  | mthl9             | 77    | 13.9596 | 3.73  |
| chr3L | 341215  | 341839  | mthl10            | 65    | 60.0608 | 7.24  |
| chr3L | 346730  | 348069  | mth               | 917   | 67.6254 | 7.02  |
| chr3L | 346730  | 348069  | Ptpmeg            | 416   | 67.6254 | 7.02  |
| chr3L | 377785  | 378508  | trh               | 881   | 316.742 | 22.99 |
| chr3L | 432595  | 433030  | CG13891           | 1100  | 51.1014 | 7.19  |
| chr3L | 439533  | 439822  | klar              | 1490  | 13.5724 | 3.48  |
| chr3L | 440698  | 442000  | klar              | 45    | 316.742 | 33.46 |
| chr3L | 448000  | 448286  | klar              | 13    | 33.644  | 6.08  |
| chr3L | 490528  | 491031  | klar              | 28    | 165.214 | 15.69 |
| chr3L | 505812  | 506403  | CR46002           | 3080  | 38.6252 | 5.35  |
| chr3L | 539402  | 540733  | klar              | 343   | 50.8555 | 6.39  |
| chr3L | 542908  | 544743  | Cypl              | 528   | 316.742 | 33.49 |
| chr3L | 542908  | 544743  | Hipk              | 400   | 316.742 | 33.49 |
| chr3L | 545416  | 546516  | Hipk              | 73    | 155.079 | 14.47 |
| chr3L | 550763  | 551025  | CR46249           | 116   | 17.0481 | 4.06  |
| chr3L | 557053  | 557447  | CR45808           | 4003  | 6.05588 | 2.22  |
| chr3L | 561046  | 561481  | CR45808           | 8000  | 21.8225 | 4.62  |
| chr3L | 561771  | 562090  | Hipk              | 7367  | 24.4843 | 4.70  |
| chr3L | 563050  | 564879  | Hipk              | 5582  | 43.0447 | 5.85  |
| chr3L | 593210  | 593546  | MED14             | 146   | 15.2794 | 3.54  |
| chr3L | 603707  | 604422  | CG13893           | 51    | 316.742 | 25.13 |
| chr3L | 606314  | 607243  | Reg-2             | 84    | 33.0999 | 5.18  |
| chr3L | 616338  | 617310  | CR42719           | 197   | 316.742 | 29.55 |
| chr3L | 626007  | 627215  | CR43334           | 1556  | 135.399 | 13.26 |
| chr3L | 627756  | 630392  | CR43334           | 1667  | 283.94  | 17.93 |
| chr3L | 633385  | 633721  | CR43423           | 4493  | 18.0995 | 4.22  |
| chr3L | 648404  | 649154  | Gale              | 87    | 316.742 | 17.69 |
| chr3L | 662690  | 663040  | Rev1              | 8516  | 21.2307 | 5.02  |
| chr3L | 673242  | 673809  | CG17129           | 6767  | 98.4378 | 10.76 |
| chr3L | 681829  | 682775  | CG3386            | 54    | 90.6169 | 8.16  |
| chr3L | 684974  | 685880  | ebd1              | 40    | 316.742 | 25.69 |
| chr3L | 696754  | 697096  | CG13894           | 2340  | 7.79166 | 2.80  |
| chr3L | 707698  | 708564  | CG13895           | 36    | 316.742 | 25.34 |
| chr3L | 738299  | 739918  | hng3              | 137   | 316.742 | 40.45 |
| chr3L | 748323  | 749737  | emc               | 55    | 316.742 | 24.67 |
| chr3L | 751474  | 752267  | emc               | 2371  | 89.9769 | 10.38 |
| chr3L | 753603  | 754316  | hng3              | 1436  | 83.3739 | 8.73  |
| chr3L | 766037  | 766790  | hng3              | 10917 | 13.6387 | 3.45  |
| chr3L | 769037  | 769687  | hng3              | 13935 | 316.742 | 21.95 |
| chr3L | 774699  | 775349  | hng3              | 19787 | 8.71584 | 2.75  |
| chr3L | 777277  | 777933  | hng3              | 22144 | 19.008  | 4.23  |
| chr3L | 784003  | 784841  | CG13898           | 19640 | 49.7132 | 6.49  |
| chr3L | 805021  | 805392  | CG13898           | 1119  | 41.4594 | 7.19  |
| chr3L | 809249  | 809698  | CR44537           | 3822  | 84.8759 | 9.81  |
| chr3L | 837505  | 837954  | CG13901           | 34    | 11.7095 | 2.96  |
| chr3L | 837505  | 837954  | CG13887           | 5     | 11.7095 | 2.96  |
| chr3L | 857049  | 857882  | dpr20             | 25    | 44.7875 | 6.81  |
| chr3L | 871810  | 872773  | Usp10             | 250   | 71.5426 | 7.84  |
| chr3L | 875612  | 875991  | Usp10             | 2941  | 13.0938 | 3.48  |
| chr3L | 880774  | 882518  | CG13907           | 31    | 316.742 | 51.77 |
| chr3L | 882800  | 883184  | CG13907           | 1003  | 29.077  | 4.75  |
| chr3L | 885830  | 887081  | Usp10             | 1416  | 67.6144 | 7.28  |
| chr3L | 895304  | 896227  | CG34056           | 15    | 125.988 | 14.08 |
| chr3L | 913796  | 915200  | Glut1             | 348   | 39.2811 | 6.19  |
| chr3L | 958970  | 960367  | Glut1             | 66    | 316.742 | 33.79 |
| chr3L | 1000512 | 1001100 | trio              | 251   | 121.988 | 10.86 |
| chr3L | 1000512 | 1001100 | CR45811           | 208   | 121.988 | 10.86 |
| chr3L | 1007629 | 1008449 | trio              | 403   | 200.671 | 18.08 |
| chr3L | 1022770 | 1023238 | trio              | 220   | 24.2433 | 5.23  |
| chr3L | 1034220 | 1035260 | CG9205            | 55    | 18.0426 | 3.49  |
| chr3L | 1034220 | 1035260 | trio              | 124   | 18.0426 | 3.49  |

|       |         |         |            |      |         |       |
|-------|---------|---------|------------|------|---------|-------|
| chr3L | 1034220 | 1035260 | CG9205     | 433  | 18.0426 | 3.49  |
| chr3L | 1098359 | 1099192 | bab1       | 2197 | 316.742 | 22.99 |
| chr3L | 1101459 | 1103092 | bab1       | 1438 | 316.742 | 31.66 |
| chr3L | 1177023 | 1178797 | bab2       | 91   | 316.742 | 27.34 |
| chr3L | 1195975 | 1196471 | Aplip1     | 107  | 68.5105 | 9.64  |
| chr3L | 1202669 | 1203088 | CG32335    | 137  | 37.1888 | 6.37  |
| chr3L | 1204109 | 1205025 | CG9119     | 511  | 25.7802 | 4.63  |
| chr3L | 1208061 | 1208668 | mwh        | 81   | 280.769 | 19.58 |
| chr3L | 1256136 | 1256872 | CG9134     | 1    | 240.309 | 19.00 |
| chr3L | 1274705 | 1276210 | CG32333    | 19   | 83.9855 | 10.43 |
| chr3L | 1298481 | 1298963 | scf        | 21   | 174.185 | 15.10 |
| chr3L | 1307125 | 1307385 | CG2469     | 61   | 9.7112  | 2.64  |
| chr3L | 1313004 | 1313884 | CG9186     | 298  | 25.2826 | 3.57  |
| chr3L | 1313004 | 1313884 | CG9153     | 20   | 25.2826 | 3.57  |
| chr3L | 1334627 | 1336534 | l(3)02640  | 634  | 182.733 | 12.80 |
| chr3L | 1334627 | 1336534 | CG2211     | 163  | 182.733 | 12.80 |
| chr3L | 1349536 | 1350049 | Ptp61F     | 218  | 18.3573 | 3.93  |
| chr3L | 1366801 | 1367434 | ru         | 3592 | 107.414 | 9.69  |
| chr3L | 1379195 | 1379458 | ru         | 8680 | 12.7271 | 3.45  |
| chr3L | 1463462 | 1464280 | rho        | 27   | 151.849 | 11.13 |
| chr3L | 1489364 | 1489922 | stet       | 93   | 114.553 | 10.17 |
| chr3L | 1502079 | 1502599 | pUf68      | 278  | 12.3213 | 3.07  |
| chr3L | 1515723 | 1516027 | cue        | 1436 | 15.1495 | 3.71  |
| chr3L | 1516328 | 1518102 | cue        | 57   | 22.1008 | 3.81  |
| chr3L | 1516328 | 1518102 | Psa        | 285  | 22.1008 | 3.81  |
| chr3L | 1536420 | 1536911 | CG12091    | 87   | 13.3419 | 3.22  |
| chr3L | 1537181 | 1537773 | CG7852     | 100  | 16.3747 | 3.48  |
| chr3L | 1546005 | 1547054 | Cct1       | 328  | 88.672  | 7.74  |
| chr3L | 1549716 | 1550077 | Cct1       | 50   | 20.9206 | 4.32  |
| chr3L | 1549716 | 1550077 | CR45813    | 29   | 20.9206 | 4.32  |
| chr3L | 1557989 | 1558778 | Pex10      | 229  | 35.3943 | 5.14  |
| chr3L | 1557989 | 1558778 | CG12099    | 28   | 35.3943 | 5.14  |
| chr3L | 1568174 | 1568724 | CG7879     | 119  | 26.2485 | 4.21  |
| chr3L | 1569078 | 1569437 | CG12004    | 53   | 16.3667 | 3.85  |
| chr3L | 1569730 | 1570088 | CG12004    | 679  | 17.2405 | 3.59  |
| chr3L | 1576515 | 1576829 | CG13917    | 6    | 17.2241 | 3.55  |
| chr3L | 1577331 | 1577806 | CG13917    | 865  | 44.195  | 6.45  |
| chr3L | 1586247 | 1587020 | CG13917    | 94   | 316.742 | 54.04 |
| chr3L | 1591195 | 1591521 | CG13917    | 4708 | 22.8209 | 4.56  |
| chr3L | 1592809 | 1593529 | CG13917    | 6392 | 18.4479 | 3.76  |
| chr3L | 1626848 | 1627361 | CG13928    | 1259 | 112.024 | 11.20 |
| chr3L | 1628027 | 1628717 | CG13928    | 21   | 70.6617 | 9.14  |
| chr3L | 1629093 | 1629540 | GC         | 3    | 32.8668 | 5.60  |
| chr3L | 1636752 | 1637822 | nSyb       | 537  | 106.31  | 12.74 |
| chr3L | 1648703 | 1649086 | CG13920    | 18   | 48.2803 | 7.11  |
| chr3L | 1652876 | 1653347 | CG7967     | 268  | 22.5848 | 4.00  |
| chr3L | 1652876 | 1653347 | CG7970     | 164  | 22.5848 | 4.00  |
| chr3L | 1661917 | 1662370 | CG7971     | 2108 | 37.5953 | 6.28  |
| chr3L | 1663579 | 1663878 | CG7971     | 524  | 9.56063 | 3.06  |
| chr3L | 1664152 | 1664518 | CG7971     | 120  | 58.2368 | 7.34  |
| chr3L | 1730028 | 1730536 | drpr       | 712  | 10.3923 | 2.82  |
| chr3L | 1730855 | 1731248 | drpr       | 17   | 22.9262 | 4.46  |
| chr3L | 1738571 | 1739345 | Gk         | 51   | 22.835  | 4.39  |
| chr3L | 1739919 | 1740178 | Gk         | 729  | 7.39486 | 2.47  |
| chr3L | 1741642 | 1742062 | Gk         | 66   | 25.5623 | 4.49  |
| chr3L | 1746189 | 1747224 | CG13921    | 19   | 220.231 | 20.58 |
| chr3L | 1748347 | 1748820 | CG13921    | 283  | 57.6881 | 6.74  |
| chr3L | 1755282 | 1756040 | Cht2       | 105  | 154.756 | 11.90 |
| chr3L | 1794096 | 1795681 | alpha-Spec | 520  | 316.742 | 18.78 |
| chr3L | 1794096 | 1795681 | dlt        | 520  | 316.742 | 18.78 |
| chr3L | 1794096 | 1795681 | Cdc37      | 583  | 316.742 | 18.78 |
| chr3L | 1802915 | 1803289 | CG42676    | 79   | 22.0647 | 4.25  |
| chr3L | 1810389 | 1810666 | GV1        | 48   | 14.5688 | 3.29  |
| chr3L | 1831480 | 1832304 | Cpr62Ba    | 145  | 13.5937 | 3.31  |
| chr3L | 1859624 | 1859992 | Rap1       | 2017 | 36.3006 | 6.19  |
| chr3L | 1861244 | 1862380 | Rap1       | 133  | 283.59  | 16.88 |
| chr3L | 1876107 | 1876433 | dre4       | 44   | 12.7539 | 3.31  |
| chr3L | 1880264 | 1881040 | CG13937    | 2180 | 11.0348 | 3.17  |
| chr3L | 1882549 | 1883558 | CG13937    | 205  | 182.8   | 13.44 |
| chr3L | 1885326 | 1885789 | Tmhs       | 65   | 66.4723 | 9.00  |
| chr3L | 1926105 | 1926842 | CR45826    | 1837 | 10.6639 | 3.01  |
| chr3L | 1967290 | 1968532 | CG1927     | 532  | 288.227 | 20.15 |
| chr3L | 1969487 | 1970249 | CG1927     | 54   | 92.8131 | 8.65  |
| chr3L | 2150123 | 2150902 | zormin     | 1194 | 316.742 | 22.50 |
| chr3L | 2151454 | 2152287 | zormin     | 132  | 316.742 | 37.92 |

|       |         |         |               |      |         |       |
|-------|---------|---------|---------------|------|---------|-------|
| chr3L | 2152646 | 2153046 | zornin        | 1217 | 12.8751 | 3.34  |
| chr3L | 2163664 | 2164008 | CG15822       | 41   | 25.856  | 4.89  |
| chr3L | 2168991 | 2169274 | CG15879       | 1    | 22.0711 | 4.81  |
| chr3L | 2191946 | 2192551 | CG5707        | 53   | 316.742 | 22.26 |
| chr3L | 2228353 | 2229546 | Oseg2         | 473  | 212.201 | 18.76 |
| chr3L | 2237177 | 2237515 | ACXD          | 365  | 7.8707  | 2.67  |
| chr3L | 2244110 | 2244378 | CG32301       | 246  | 17.4916 | 3.52  |
| chr3L | 2255748 | 2257963 | CG1275        | 52   | 149.8   | 12.73 |
| chr3L | 2255748 | 2257963 | CG2034        | 1393 | 149.8   | 12.73 |
| chr3L | 2282397 | 2282998 | MsR2          | 242  | 39.3302 | 7.25  |
| chr3L | 2322415 | 2322747 | MsR1          | 148  | 13.319  | 3.48  |
| chr3L | 2387864 | 2388173 | CG45186       | 2    | 24.2064 | 4.17  |
| chr3L | 2411303 | 2412284 | CG45186       | 72   | 83.9024 | 9.95  |
| chr3L | 2417247 | 2417519 | CG45186       | 594  | 20.0607 | 4.74  |
| chr3L | 2428651 | 2429067 | CG45186       | 50   | 36.9101 | 5.15  |
| chr3L | 2433976 | 2434378 | CG45186       | 4975 | 15.5019 | 3.90  |
| chr3L | 2466526 | 2467059 | CG45186       | 97   | 273.148 | 16.33 |
| chr3L | 2478315 | 2479105 | Cyp4d20       | 125  | 97.2944 | 9.35  |
| chr3L | 2488676 | 2489048 | CG1146        | 47   | 31.5617 | 5.29  |
| chr3L | 2489880 | 2490441 | CG1146        | 95   | 316.742 | 32.07 |
| chr3L | 2494231 | 2494713 | CG45186       | 18   | 47.9695 | 6.28  |
| chr3L | 2494980 | 2495364 | CG45186       | 639  | 32.9726 | 5.78  |
| chr3L | 2516800 | 2517124 | CR45170       | 158  | 19.2862 | 4.28  |
| chr3L | 2554168 | 2554426 | Spn           | 20   | 14.2045 | 3.10  |
| chr3L | 2581055 | 2581467 | msn           | 4982 | 35.9886 | 6.22  |
| chr3L | 2584415 | 2584876 | msn           | 1666 | 23.7963 | 4.76  |
| chr3L | 2585549 | 2586704 | msn           | 227  | 316.742 | 27.01 |
| chr3L | 2589311 | 2590309 | dos           | 654  | 130.649 | 11.83 |
| chr3L | 2599121 | 2599688 | CG16985       | 12   | 24.8525 | 4.22  |
| chr3L | 2599121 | 2599688 | CG12182       | 295  | 24.8525 | 4.22  |
| chr3L | 2631915 | 2633314 | MEP-1         | 716  | 307.178 | 22.19 |
| chr3L | 2634786 | 2636550 | MEP-1         | 281  | 149.303 | 12.56 |
| chr3L | 2711547 | 2712141 | Fife          | 96   | 79.263  | 8.06  |
| chr3L | 2712518 | 2712961 | Fife          | 1064 | 66.3745 | 8.18  |
| chr3L | 2734636 | 2734907 | Mrtf          | 107  | 20.1656 | 4.54  |
| chr3L | 2766061 | 2766386 | Mrtf          | 283  | 8.34871 | 2.50  |
| chr3L | 2773935 | 2774638 | CG12093       | 451  | 14.7196 | 3.28  |
| chr3L | 2773935 | 2774638 | Atg2          | 121  | 14.7196 | 3.28  |
| chr3L | 2820737 | 2821508 | Tet           | 123  | 316.742 | 28.68 |
| chr3L | 2823204 | 2824099 | Tet           | 2517 | 163.364 | 15.93 |
| chr3L | 2824401 | 2825146 | Tet           | 3789 | 64.3803 | 8.11  |
| chr3L | 2828511 | 2829140 | Tet           | 7883 | 44.9356 | 7.31  |
| chr3L | 2891935 | 2892509 | spz5          | 59   | 312.813 | 22.34 |
| chr3L | 2894894 | 2895186 | Shab          | 12   | 21.825  | 4.69  |
| chr3L | 2896378 | 2896958 | Shab          | 92   | 83.8549 | 9.73  |
| chr3L | 3035172 | 3036180 | CG2162        | 327  | 70.1853 | 6.60  |
| chr3L | 3036605 | 3036878 | CG2162        | 1558 | 14.7593 | 3.32  |
| chr3L | 3037469 | 3038672 | CG2162        | 90   | 96.6376 | 11.13 |
| chr3L | 3044813 | 3045469 | scramb2       | 1725 | 86.793  | 8.51  |
| chr3L | 3046492 | 3046870 | scramb2       | 63   | 14.2848 | 3.28  |
| chr3L | 3059788 | 3061324 | CG16753       | 5669 | 137.213 | 10.68 |
| chr3L | 3069866 | 3071185 | CG32486       | 74   | 316.742 | 17.72 |
| chr3L | 3069866 | 3071185 | CG11486       | 367  | 316.742 | 17.72 |
| chr3L | 3071754 | 3072040 | CG11486       | 636  | 21.614  | 4.33  |
| chr3L | 3077559 | 3078199 | CG11486       | 59   | 258.49  | 14.71 |
| chr3L | 3080307 | 3081892 | CG11486       | 273  | 302.037 | 20.60 |
| chr3L | 3090499 | 3090925 | snRNA:U5:63BC | 97   | 43.5001 | 6.12  |
| chr3L | 3100936 | 3101273 | Cht7          | 5826 | 27.5697 | 5.55  |
| chr3L | 3123218 | 3123636 | prominin-like | 277  | 20.5148 | 4.55  |
| chr3L | 3133969 | 3134483 | CG11537       | 74   | 218.101 | 18.89 |
| chr3L | 3139741 | 3140689 | CG11537       | 546  | 23.665  | 4.37  |
| chr3L | 3143047 | 3143522 | CG11537       | 42   | 10.1241 | 2.97  |
| chr3L | 3148155 | 3148426 | Usp5          | 105  | 12.8367 | 3.13  |
| chr3L | 3148704 | 3149929 | BtbVII        | 364  | 316.742 | 21.57 |
| chr3L | 3165169 | 3165470 | CG32280       | 67   | 11.0069 | 2.97  |
| chr3L | 3178443 | 3178710 | CG14964       | 5    | 12.8569 | 3.29  |
| chr3L | 3193023 | 3193496 | Hsp83         | 4    | 69.3674 | 7.13  |
| chr3L | 3193964 | 3194495 | Hsp83         | 899  | 17.7496 | 3.92  |
| chr3L | 3197113 | 3197583 | CG14966       | 91   | 6.95269 | 2.20  |
| chr3L | 3198657 | 3199497 | CG32276       | 59   | 25.969  | 4.21  |
| chr3L | 3198657 | 3199497 | gry           | 101  | 25.969  | 4.21  |
| chr3L | 3224853 | 3226743 | CG11505       | 241  | 316.742 | 43.80 |
| chr3L | 3246517 | 3246866 | CG43389       | 1322 | 31.3617 | 5.61  |
| chr3L | 3249435 | 3250897 | CR43626       | 108  | 316.742 | 45.62 |
| chr3L | 3267027 | 3267593 | CG34265       | 1184 | 275.703 | 17.42 |

|       |         |         |          |       |         |       |
|-------|---------|---------|----------|-------|---------|-------|
| chr3L | 3300937 | 3301579 | CG14968  | 127   | 316.742 | 25.64 |
| chr3L | 3303684 | 3304315 | ZnT63C   | 203   | 24.9883 | 4.07  |
| chr3L | 3319501 | 3319811 | CG12016  | 105   | 9.45636 | 2.91  |
| chr3L | 3319501 | 3319811 | CG42456  | 105   | 9.45636 | 2.91  |
| chr3L | 3325664 | 3326498 | Strip    | 384   | 24.7659 | 3.66  |
| chr3L | 3325664 | 3326498 | PHGPx    | 66    | 24.7659 | 3.66  |
| chr3L | 3336685 | 3337628 | kst      | 80    | 264.426 | 15.61 |
| chr3L | 3338120 | 3338969 | kst      | 1525  | 173.616 | 14.54 |
| chr3L | 3373933 | 3374361 | YT521-B  | 20    | 17.0425 | 3.73  |
| chr3L | 3373933 | 3374361 | CG12010  | 91    | 17.0425 | 3.73  |
| chr3L | 3417141 | 3420806 | sty      | 554   | 316.742 | 23.49 |
| chr3L | 3424879 | 3425502 | sty      | 394   | 28.793  | 5.41  |
| chr3L | 3427054 | 3427437 | sty      | 2359  | 18.252  | 4.13  |
| chr3L | 3436931 | 3437188 | sty      | 12170 | 14.2475 | 3.92  |
| chr3L | 3515667 | 3516119 | Eip63E   | 125   | 38.8193 | 4.97  |
| chr3L | 3542289 | 3543921 | Eip63E   | 813   | 316.742 | 25.87 |
| chr3L | 3544821 | 3545391 | Eip63E   | 176   | 91.1141 | 9.38  |
| chr3L | 3616406 | 3616702 | CG10357  | 1155  | 26.3999 | 4.81  |
| chr3L | 3624732 | 3625331 | dar1     | 1329  | 102.986 | 11.82 |
| chr3L | 3625855 | 3626562 | dar1     | 164   | 316.742 | 30.99 |
| chr3L | 3632191 | 3633372 | dar1     | 6681  | 203.636 | 17.57 |
| chr3L | 3746502 | 3746962 | CG32264  | 145   | 57.3921 | 7.89  |
| chr3L | 3747318 | 3747669 | CG32264  | 896   | 51.6622 | 6.80  |
| chr3L | 3749488 | 3749802 | CG32264  | 3063  | 21.5869 | 4.51  |
| chr3L | 3756669 | 3757129 | ppk27    | 1751  | 50.9998 | 6.70  |
| chr3L | 3757734 | 3758155 | CG32264  | 1237  | 75.3551 | 9.94  |
| chr3L | 3763147 | 3763535 | CG32264  | 2358  | 60.2837 | 9.00  |
| chr3L | 3765563 | 3766216 | CG32264  | 127   | 316.742 | 24.93 |
| chr3L | 3771269 | 3771537 | CG32264  | 5775  | 8.4006  | 2.75  |
| chr3L | 3773861 | 3774265 | CG32264  | 8243  | 18.0691 | 4.21  |
| chr3L | 3784049 | 3784343 | CG32264  | 3715  | 11.3812 | 3.20  |
| chr3L | 3787047 | 3788239 | CG32264  | 26    | 94.3781 | 9.10  |
| chr3L | 3789058 | 3789526 | CG32264  | 1321  | 172.37  | 12.65 |
| chr3L | 3801064 | 3801828 | CG32264  | 34    | 64.4974 | 8.04  |
| chr3L | 3802247 | 3802540 | CG32264  | 1111  | 16.3449 | 3.91  |
| chr3L | 3814172 | 3814566 | Scsalpha | 146   | 11.7477 | 3.07  |
| chr3L | 3822710 | 3823387 | Rdh      | 2458  | 89.0967 | 10.45 |
| chr3L | 3824844 | 3825974 | Rdh      | 84    | 161.955 | 15.81 |
| chr3L | 3826315 | 3827153 | Rdh      | 1134  | 31.0683 | 5.20  |
| chr3L | 3827993 | 3828497 | enc      | 686   | 93.4102 | 10.89 |
| chr3L | 3830059 | 3830442 | enc      | 1251  | 33.8181 | 6.40  |
| chr3L | 3845693 | 3846528 | Awh      | 22    | 123.09  | 12.61 |
| chr3L | 3878826 | 3879173 | CR43917  | 5757  | 14.76   | 3.49  |
| chr3L | 3901940 | 3902819 | Ubi-p63E | 25    | 49.5072 | 6.53  |
| chr3L | 3908987 | 3909335 | mge      | 511   | 9.19162 | 2.97  |
| chr3L | 3925541 | 3926653 | Eip63F-1 | 828   | 65.1514 | 7.73  |
| chr3L | 3942185 | 3943144 | CG10863  | 18    | 41.6685 | 5.58  |
| chr3L | 3942185 | 3943144 | CG14982  | 262   | 41.6685 | 5.58  |
| chr3L | 3952080 | 3952517 | CG14984  | 192   | 11.636  | 3.35  |
| chr3L | 3960854 | 3961214 | CG12605  | 956   | 13.4742 | 3.79  |
| chr3L | 3963330 | 3964420 | CG12605  | 234   | 85.9274 | 10.10 |
| chr3L | 3964760 | 3965387 | CG12605  | 412   | 22.4866 | 4.91  |
| chr3L | 3983150 | 3984033 | scrt     | 59    | 116.234 | 12.63 |
| chr3L | 4025768 | 4026262 | CG11594  | 23    | 227.222 | 17.49 |
| chr3L | 4062018 | 4062369 | dib      | 79    | 86.2945 | 10.28 |
| chr3L | 4068429 | 4068740 | CG32259  | 811   | 16.1276 | 3.37  |
| chr3L | 4070127 | 4070690 | CG32259  | 894   | 240.702 | 18.39 |
| chr3L | 4071116 | 4072166 | wit      | 83    | 316.742 | 43.75 |
| chr3L | 4073694 | 4074200 | Faa      | 16    | 272.176 | 20.01 |
| chr3L | 4088843 | 4089176 | CG14989  | 143   | 20.9712 | 5.04  |
| chr3L | 4092751 | 4093090 | CG14990  | 283   | 55.1986 | 6.78  |
| chr3L | 4102258 | 4102945 | CG14995  | 1     | 316.742 | 20.68 |
| chr3L | 4103445 | 4104344 | Fit1     | 185   | 163.236 | 12.74 |
| chr3L | 4108167 | 4108818 | Ack      | 276   | 31.045  | 4.51  |
| chr3L | 4109295 | 4109734 | Ack      | 1294  | 29.5525 | 5.33  |
| chr3L | 4122009 | 4122579 | Chd64    | 48    | 47.3088 | 5.82  |
| chr3L | 4133738 | 4134552 | ens      | 321   | 241.939 | 15.18 |
| chr3L | 4138776 | 4139498 | Rop      | 307   | 21.3272 | 4.12  |
| chr3L | 4138776 | 4139498 | Ras64B   | 228   | 21.3272 | 4.12  |
| chr3L | 4147216 | 4147612 | CG1299   | 1146  | 9.00951 | 2.93  |
| chr3L | 4148338 | 4149083 | CG1299   | 64    | 197.248 | 13.70 |
| chr3L | 4170335 | 4170607 | Ero1L    | 31    | 14.1002 | 3.32  |
| chr3L | 4178148 | 4178574 | Teh4     | 24    | 14.0377 | 3.80  |
| chr3L | 4185096 | 4185742 | Teh3     | 754   | 77.9396 | 9.02  |
| chr3L | 4187756 | 4188629 | Teh2     | 104   | 46.2025 | 6.90  |

|       |         |         |            |      |         |       |
|-------|---------|---------|------------|------|---------|-------|
| chr3L | 4187756 | 4188629 | tipE       | 371  | 46.2025 | 6.90  |
| chr3L | 4221312 | 4221625 | CR32252    | 1235 | 20.9767 | 4.38  |
| chr3L | 4225601 | 4225961 | ImpL2      | 79   | 12.8627 | 3.70  |
| chr3L | 4227077 | 4227661 | ImpL2      | 80   | 201.422 | 16.29 |
| chr3L | 4227936 | 4229322 | ImpL2      | 1609 | 155.787 | 14.34 |
| chr3L | 4232242 | 4232631 | ImpL2      | 3673 | 29.2779 | 5.59  |
| chr3L | 4233609 | 4234376 | ImpL2      | 2201 | 316.742 | 20.01 |
| chr3L | 4239376 | 4240419 | CG14997    | 645  | 13.4374 | 3.10  |
| chr3L | 4252077 | 4252470 | ago        | 251  | 52.7133 | 6.82  |
| chr3L | 4253325 | 4254400 | ago        | 186  | 53.5625 | 7.20  |
| chr3L | 4286360 | 4286734 | TfIIbeta   | 514  | 28.441  | 4.49  |
| chr3L | 4288778 | 4289269 | Hexo1      | 105  | 80.8688 | 9.32  |
| chr3L | 4360309 | 4360728 | Cip4       | 3446 | 60.9484 | 7.30  |
| chr3L | 4363028 | 4364235 | Cip4       | 323  | 106.466 | 9.48  |
| chr3L | 4372046 | 4372362 | CG11342    | 4817 | 13.8213 | 4.01  |
| chr3L | 4380160 | 4380717 | DopEcR     | 81   | 252.165 | 17.15 |
| chr3L | 4406809 | 4407378 | DOR        | 78   | 158.544 | 14.67 |
| chr3L | 4409457 | 4410315 | DOR        | 2903 | 35.1385 | 5.52  |
| chr3L | 4412124 | 4412455 | DOR        | 2083 | 12.2014 | 2.98  |
| chr3L | 4412805 | 4413244 | DOR        | 1250 | 21.2219 | 3.75  |
| chr3L | 4413734 | 4415591 | DOR        | 166  | 316.742 | 20.33 |
| chr3L | 4416788 | 4417168 | DOR        | 1719 | 27.5045 | 4.82  |
| chr3L | 4430342 | 4430880 | nAChRbeta1 | 1379 | 31.816  | 5.27  |
| chr3L | 4431213 | 4431662 | nAChRbeta1 | 2104 | 49.0457 | 7.76  |
| chr3L | 4436495 | 4436804 | CG15021    | 33   | 19.1267 | 4.38  |
| chr3L | 4531853 | 4532423 | Tie        | 24   | 173.384 | 14.74 |
| chr3L | 4541650 | 4544252 | CG11357    | 15   | 316.742 | 23.90 |
| chr3L | 4556853 | 4557467 | CG42540    | 158  | 35.5835 | 6.22  |
| chr3L | 4574409 | 4575211 | CG42540    | 318  | 51.6407 | 8.20  |
| chr3L | 4624452 | 4624793 | Src64B     | 1528 | 47.0028 | 6.34  |
| chr3L | 4625058 | 4626375 | Src64B     | 24   | 155.466 | 11.65 |
| chr3L | 4626688 | 4627313 | HDAC1      | 475  | 10.0788 | 2.82  |
| chr3L | 4626688 | 4627313 | CR45438    | 305  | 10.0788 | 2.82  |
| chr3L | 4685012 | 4685275 | axo        | 2131 | 9.82837 | 3.08  |
| chr3L | 4687272 | 4687591 | axo        | 131  | 22.0038 | 4.59  |
| chr3L | 4692016 | 4693046 | RhoGEF64C  | 485  | 316.742 | 22.55 |
| chr3L | 4708011 | 4708512 | CG13712    | 1675 | 52.7313 | 8.10  |
| chr3L | 4800638 | 4801058 | CR45740    | 846  | 43.8783 | 6.25  |
| chr3L | 4824435 | 4824840 | Dhc64C     | 1026 | 21.1203 | 3.94  |
| chr3L | 4975971 | 4976790 | Con        | 188  | 111.706 | 11.94 |
| chr3L | 5079010 | 5079404 | Con        | 174  | 22.4872 | 5.07  |
| chr3L | 5126279 | 5126705 | CG4597     | 3199 | 31.4493 | 6.36  |
| chr3L | 5152535 | 5152857 | Srp54k     | 44   | 12.4529 | 3.00  |
| chr3L | 5180879 | 5181369 | shep       | 3759 | 53.4551 | 7.44  |
| chr3L | 5184178 | 5185366 | shep       | 100  | 316.742 | 39.28 |
| chr3L | 5186577 | 5187434 | shep       | 1979 | 46.9023 | 6.69  |
| chr3L | 5206228 | 5206671 | shep       | 4926 | 16.5777 | 4.14  |
| chr3L | 5243291 | 5243792 | shep       | 4827 | 31.7491 | 5.94  |
| chr3L | 5247879 | 5249506 | shep       | 801  | 278.846 | 17.71 |
| chr3L | 5273245 | 5273589 | shep       | 138  | 20.8549 | 4.19  |
| chr3L | 5276531 | 5278297 | shep       | 700  | 316.742 | 26.25 |
| chr3L | 5329279 | 5330017 | CR45742    | 5294 | 64.4974 | 8.04  |
| chr3L | 5354592 | 5355998 | lama       | 169  | 133.004 | 10.40 |
| chr3L | 5360010 | 5360487 | Cyt-c1     | 18   | 70.4467 | 7.40  |
| chr3L | 5365358 | 5366227 | Uev1A      | 156  | 40.2026 | 5.16  |
| chr3L | 5575648 | 5576000 | Msr-110    | 648  | 15.0379 | 3.74  |
| chr3L | 5577162 | 5578076 | Msr-110    | 38   | 30.8454 | 5.10  |
| chr3L | 5583633 | 5583962 | I(3)psg2   | 28   | 10.2175 | 3.17  |
| chr3L | 5610425 | 5611093 | Eaf6       | 2440 | 316.742 | 24.94 |
| chr3L | 5611636 | 5612459 | Eaf6       | 3770 | 265.262 | 19.23 |
| chr3L | 5629707 | 5631212 | Blimp-1    | 316  | 316.742 | 44.36 |
| chr3L | 5632403 | 5633020 | Blimp-1    | 1610 | 57.4755 | 7.13  |
| chr3L | 5634062 | 5634609 | Blimp-1    | 1618 | 69.535  | 8.18  |
| chr3L | 5635136 | 5635453 | Blimp-1    | 720  | 26.4501 | 4.88  |
| chr3L | 5639466 | 5640541 | Blimp-1    | 1861 | 316.742 | 21.05 |
| chr3L | 5642763 | 5643236 | Blimp-1    | 628  | 29.0227 | 4.79  |
| chr3L | 5657454 | 5658043 | sif        | 149  | 155.149 | 11.37 |
| chr3L | 5664059 | 5665018 | sif        | 331  | 69.1224 | 8.47  |
| chr3L | 5665397 | 5665863 | sif        | 525  | 51.9747 | 7.01  |
| chr3L | 5678215 | 5679084 | sif        | 122  | 28.9673 | 5.44  |
| chr3L | 5688723 | 5689084 | sif        | 2580 | 22.2685 | 4.94  |
| chr3L | 5690632 | 5691666 | sif        | 107  | 96.8609 | 11.55 |
| chr3L | 5751474 | 5752349 | DnaJ-1     | 29   | 67.1378 | 6.90  |
| chr3L | 5752958 | 5753717 | Usp47      | 272  | 31.0738 | 4.80  |
| chr3L | 5768948 | 5769687 | scny       | 189  | 83.0346 | 9.11  |

|       |         |         |           |       |         |       |
|-------|---------|---------|-----------|-------|---------|-------|
| chr3L | 5770127 | 5771501 | scny      | 243   | 139.122 | 11.70 |
| chr3L | 5774653 | 5775206 | vito      | 2510  | 20.3392 | 4.38  |
| chr3L | 5801892 | 5802276 | CG42272   | 871   | 15.3421 | 4.05  |
| chr3L | 5807348 | 5808495 | S6k       | 2909  | 81.5911 | 8.31  |
| chr3L | 5809749 | 5811126 | S6k       | 29    | 17.6046 | 3.74  |
| chr3L | 5809749 | 5811126 | CG5537    | 70    | 17.6046 | 3.74  |
| chr3L | 5845457 | 5845989 | vn        | 19    | 90.3461 | 11.85 |
| chr3L | 5869633 | 5869949 | CG5568    | 1754  | 28.0734 | 5.05  |
| chr3L | 5902148 | 5902789 | QC        | 35    | 176.421 | 13.17 |
| chr3L | 5920787 | 5921417 | CG10483   | 321   | 22.1626 | 4.76  |
| chr3L | 5922043 | 5922755 | CG32407   | 76    | 227.566 | 16.47 |
| chr3L | 5923645 | 5924229 | Vap-33B   | 27    | 37.6449 | 6.29  |
| chr3L | 5926348 | 5927054 | Vap-33B   | 171   | 223.418 | 17.29 |
| chr3L | 5997033 | 5997375 | PVRAP     | 66    | 23.2633 | 5.00  |
| chr3L | 6076473 | 6076880 | ssp6      | 27    | 54.9599 | 7.11  |
| chr3L | 6082629 | 6083181 | CG13293   | 73    | 19.7607 | 4.83  |
| chr3L | 6110746 | 6111406 | Ets65A    | 578   | 17.1528 | 4.34  |
| chr3L | 6124698 | 6124997 | CR46005   | 553   | 25.4402 | 4.41  |
| chr3L | 6184821 | 6185261 | D19B      | 135   | 82.1764 | 8.88  |
| chr3L | 6184821 | 6185261 | CG43293   | 133   | 82.1764 | 8.88  |
| chr3L | 6192958 | 6194093 | CG13298   | 745   | 35.4255 | 4.54  |
| chr3L | 6192958 | 6194093 | Trn       | 179   | 35.4255 | 4.54  |
| chr3L | 6218437 | 6218983 | LanA      | 680   | 214.6   | 16.82 |
| chr3L | 6249053 | 6249336 | Mdr65     | 3497  | 13.2742 | 3.68  |
| chr3L | 6253685 | 6253940 | Best2     | 2843  | 11.7262 | 3.07  |
| chr3L | 6256355 | 6257305 | Best2     | 7     | 316.742 | 23.73 |
| chr3L | 6262452 | 6263255 | ImpL3     | 24    | 74.2693 | 9.72  |
| chr3L | 6263629 | 6264785 | CR44522   | 496   | 243.873 | 18.48 |
| chr3L | 6352331 | 6352641 | CG13300   | 67    | 17.8883 | 4.06  |
| chr3L | 6458427 | 6458740 | CG10147   | 29870 | 14.3186 | 3.81  |
| chr3L | 6495514 | 6496961 | sfl       | 674   | 237.114 | 16.89 |
| chr3L | 6550128 | 6551383 | CG18769   | 339   | 53.288  | 6.30  |
| chr3L | 6552402 | 6552889 | CG18769   | 1927  | 52.4677 | 6.25  |
| chr3L | 6570479 | 6570734 | ju        | 18905 | 12.5936 | 3.64  |
| chr3L | 6605970 | 6606228 | zpg       | 44    | 12.9286 | 3.04  |
| chr3L | 6605970 | 6606228 | CG8368    | 102   | 12.9286 | 3.04  |
| chr3L | 6608882 | 6610023 | CR45418   | 121   | 75.9139 | 8.96  |
| chr3L | 6608882 | 6610023 | CG8398    | 207   | 75.9139 | 8.96  |
| chr3L | 6623630 | 6624219 | GluRIA    | 166   | 122.027 | 12.79 |
| chr3L | 6703365 | 6703761 | SP1173    | 8     | 38.6416 | 6.40  |
| chr3L | 6719397 | 6719784 | ple       | 76    | 14.4789 | 3.20  |
| chr3L | 6728111 | 6728395 | CR45417   | 94    | 14.4387 | 3.51  |
| chr3L | 6742129 | 6744129 | dikar     | 578   | 160.344 | 11.44 |
| chr3L | 6747149 | 6747470 | velo      | 65    | 46.3516 | 7.02  |
| chr3L | 6752188 | 6752867 | velo      | 289   | 53.0335 | 5.68  |
| chr3L | 6789488 | 6790429 | vvl       | 148   | 316.742 | 25.59 |
| chr3L | 6807882 | 6808277 | vvl       | 17847 | 18.4702 | 4.44  |
| chr3L | 6863535 | 6863999 | CR45115   | 2722  | 15.0895 | 4.05  |
| chr3L | 6866135 | 6866990 | CR45115   | 70    | 16.4111 | 3.98  |
| chr3L | 6868090 | 6868441 | CR45115   | 1828  | 18.5762 | 4.39  |
| chr3L | 6899313 | 6899839 | Prat2     | 14417 | 16.5214 | 4.34  |
| chr3L | 6903753 | 6905107 | Prat2     | 9695  | 316.742 | 40.30 |
| chr3L | 6942665 | 6943873 | tow       | 680   | 145.827 | 14.04 |
| chr3L | 6964047 | 6964943 | sgl       | 64    | 101.273 | 9.66  |
| chr3L | 6969597 | 6969896 | CG9953    | 67    | 27.8127 | 5.07  |
| chr3L | 6977206 | 6977955 | CR32385   | 1077  | 38.6704 | 6.08  |
| chr3L | 6979429 | 6980207 | Galpai    | 142   | 12.6592 | 3.03  |
| chr3L | 6997419 | 6997878 | Mp        | 1205  | 79.3605 | 10.50 |
| chr3L | 6998725 | 6999030 | Mp        | 53    | 23.9919 | 5.25  |
| chr3L | 7013688 | 7014297 | Mp        | 126   | 109.454 | 10.23 |
| chr3L | 7077362 | 7077692 | CG8641    | 62    | 22.8458 | 4.99  |
| chr3L | 7094583 | 7095163 | form3     | 7     | 109.455 | 9.72  |
| chr3L | 7131529 | 7131982 | Dbi       | 78    | 80.9146 | 9.04  |
| chr3L | 7133863 | 7135275 | melt      | 85    | 316.742 | 31.23 |
| chr3L | 7156815 | 7157298 | corn      | 24    | 158.059 | 12.06 |
| chr3L | 7189553 | 7190180 | Dscam2    | 4     | 95.5586 | 11.05 |
| chr3L | 7215896 | 7216237 | CR45410   | 6685  | 27.3428 | 4.98  |
| chr3L | 7225263 | 7225886 | CR45410   | 2752  | 49.7435 | 8.02  |
| chr3L | 7263496 | 7264362 | CG14830   | 118   | 316.742 | 43.95 |
| chr3L | 7312790 | 7313244 | unc-13-4A | 186   | 40.2075 | 6.82  |
| chr3L | 7313689 | 7314157 | unc-13-4A | 1041  | 30.8834 | 5.68  |
| chr3L | 7328481 | 7328931 | CG8602    | 41    | 17.7837 | 3.56  |
| chr3L | 7339466 | 7339785 | lark      | 172   | 11.0059 | 2.81  |
| chr3L | 7344575 | 7345486 | CG8596    | 55    | 316.742 | 19.19 |
| chr3L | 7347903 | 7348644 | Srp19     | 460   | 26.2698 | 4.40  |

|       |         |         |          |       |         |       |
|-------|---------|---------|----------|-------|---------|-------|
| chr3L | 7347903 | 7348644 | qm       | 182   | 26.2698 | 4.40  |
| chr3L | 7359876 | 7361753 | pst      | 1178  | 316.742 | 17.17 |
| chr3L | 7359876 | 7361753 | Sec63    | 881   | 316.742 | 17.17 |
| chr3L | 7370038 | 7370763 | akirin   | 16    | 37.2017 | 5.75  |
| chr3L | 7381202 | 7381851 | SMSr     | 28    | 316.742 | 24.05 |
| chr3L | 7381202 | 7381851 | smid     | 111   | 316.742 | 24.05 |
| chr3L | 7433426 | 7435699 | Rac2     | 148   | 316.742 | 37.41 |
| chr3L | 7495932 | 7496460 | Cyp4d8   | 11    | 109.965 | 11.19 |
| chr3L | 7498331 | 7498789 | CG8539   | 51    | 82.8388 | 11.52 |
| chr3L | 7510937 | 7511434 | CG7546   | 204   | 43.0447 | 5.85  |
| chr3L | 7518680 | 7519141 | Iti      | 84    | 29.4923 | 5.90  |
| chr3L | 7528694 | 7529546 | lqf      | 408   | 41.698  | 5.70  |
| chr3L | 7604933 | 7605254 | CG33275  | 76    | 16.7679 | 4.05  |
| chr3L | 7614536 | 7614929 | CG33275  | 9764  | 18.0593 | 4.65  |
| chr3L | 7711525 | 7711920 | Ank2     | 1899  | 34.0192 | 6.65  |
| chr3L | 7713440 | 7713857 | Ank2     | 31    | 14.2699 | 3.74  |
| chr3L | 7717962 | 7718539 | Ank2     | 270   | 10.3968 | 3.21  |
| chr3L | 7719119 | 7719711 | CG12262  | 16    | 38.908  | 4.90  |
| chr3L | 7747009 | 7747447 | CG13685  | 121   | 53.7436 | 8.20  |
| chr3L | 7760294 | 7760722 | Hn       | 11    | 32.7752 | 5.66  |
| chr3L | 7771986 | 7772832 | Clk      | 3266  | 316.742 | 26.30 |
| chr3L | 7773404 | 7773920 | Clk      | 1881  | 80.2876 | 10.07 |
| chr3L | 7775049 | 7776067 | Clk      | 74    | 316.742 | 29.03 |
| chr3L | 7781542 | 7782130 | Clk      | 6241  | 214.469 | 14.35 |
| chr3L | 7782969 | 7783324 | Clk      | 7574  | 13.3343 | 3.53  |
| chr3L | 7787788 | 7788238 | Clk      | 12418 | 23.4066 | 4.74  |
| chr3L | 7790062 | 7790810 | CG32369  | 14235 | 204.256 | 15.21 |
| chr3L | 7804558 | 7805842 | CG32369  | 813   | 248.197 | 14.42 |
| chr3L | 7808615 | 7810260 | CG32369  | 54    | 316.742 | 32.69 |
| chr3L | 7811655 | 7811911 | CG32369  | 1966  | 13.8647 | 3.36  |
| chr3L | 7826557 | 7827174 | Pdp1     | 1178  | 139.709 | 12.17 |
| chr3L | 7827781 | 7828550 | Pdp1     | 143   | 244.904 | 18.90 |
| chr3L | 7829725 | 7830014 | Pdp1     | 1888  | 10.029  | 2.85  |
| chr3L | 7832673 | 7834421 | Pdp1     | 822   | 316.742 | 21.67 |
| chr3L | 7834928 | 7836049 | Pdp1     | 2361  | 108.226 | 11.01 |
| chr3L | 7836778 | 7837500 | Pdp1     | 4170  | 316.742 | 20.28 |
| chr3L | 7847573 | 7848239 | Pdp1     | 7684  | 133.012 | 13.87 |
| chr3L | 7854317 | 7857038 | Pdp1     | 439   | 316.742 | 20.78 |
| chr3L | 7858614 | 7858973 | Pdp1     | 3173  | 8.56262 | 2.82  |
| chr3L | 7862107 | 7862654 | Pdp1     | 4990  | 58.1228 | 7.16  |
| chr3L | 7863200 | 7864491 | Pdp1     | 3732  | 281.39  | 17.82 |
| chr3L | 7865142 | 7865680 | Pdp1     | 1891  | 84.4217 | 8.72  |
| chr3L | 7866824 | 7867846 | Pdp1     | 251   | 316.742 | 26.04 |
| chr3L | 7935504 | 7936137 | syd      | 426   | 21.539  | 3.80  |
| chr3L | 7947866 | 7948314 | exex     | 101   | 88.0073 | 10.25 |
| chr3L | 7968628 | 7968964 | RNaseX25 | 1773  | 28.119  | 5.96  |
| chr3L | 7978866 | 7980165 | nmo      | 51    | 147.968 | 12.88 |
| chr3L | 8024335 | 8024697 | CR45867  | 31332 | 16.5938 | 3.65  |
| chr3L | 8056176 | 8056811 | bip1     | 105   | 316.742 | 18.12 |
| chr3L | 8057332 | 8057902 | CR45868  | 105   | 56.9395 | 7.05  |
| chr3L | 8058496 | 8058976 | bip1     | 49    | 124.785 | 10.22 |
| chr3L | 8063218 | 8064120 | Ect4     | 40    | 65.8869 | 8.57  |
| chr3L | 8065973 | 8066439 | Ect4     | 2326  | 14.4543 | 3.10  |
| chr3L | 8071685 | 8072057 | Ect4     | 900   | 31.5557 | 5.90  |
| chr3L | 8072643 | 8073363 | Ect4     | 1247  | 25.3857 | 5.32  |
| chr3L | 8081465 | 8082299 | CR43974  | 1186  | 316.742 | 25.82 |
| chr3L | 8091552 | 8092122 | CG7565   | 95    | 308.871 | 18.49 |
| chr3L | 8095671 | 8096742 | Ect4     | 422   | 163.671 | 12.99 |
| chr3L | 8102274 | 8102637 | Ect4     | 1492  | 12.8505 | 3.48  |
| chr3L | 8115853 | 8116351 | Arp3     | 259   | 13.7093 | 3.11  |
| chr3L | 8115853 | 8116351 | msk      | 17    | 13.7093 | 3.11  |
| chr3L | 8116624 | 8117144 | msk      | 889   | 10.1605 | 2.98  |
| chr3L | 8127767 | 8129041 | Uba2     | 719   | 88.8879 | 8.01  |
| chr3L | 8127767 | 8129041 | CdsA     | 484   | 88.8879 | 8.01  |
| chr3L | 8151717 | 8152407 | CG13676  | 282   | 302.964 | 22.86 |
| chr3L | 8153172 | 8154013 | CG13676  | 1919  | 28.2939 | 5.16  |
| chr3L | 8186617 | 8187498 | ERR      | 344   | 63.9555 | 6.34  |
| chr3L | 8186617 | 8187498 | Atg18a   | 21    | 63.9555 | 6.34  |
| chr3L | 8197706 | 8198042 | UbcE2M   | 6     | 14.1991 | 3.61  |
| chr3L | 8240858 | 8241485 | Dscam4   | 54    | 59.8558 | 8.35  |
| chr3L | 8285299 | 8285664 | cert     | 965   | 29.4304 | 5.62  |
| chr3L | 8299442 | 8299828 | Arl5     | 229   | 10.7303 | 2.82  |
| chr3L | 8314991 | 8315526 | CG7185   | 213   | 86.2195 | 8.99  |
| chr3L | 8346621 | 8346976 | GAPcenA  | 192   | 33.9473 | 6.24  |
| chr3L | 8358520 | 8359347 | ldh      | 43    | 25.837  | 4.48  |



|       |         |         |         |      |         |       |
|-------|---------|---------|---------|------|---------|-------|
| chr3L | 8360189 | 8361084 | ldh     | 74   | 178.074 | 13.48 |
| chr3L | 8395867 | 8396375 | CG7120  | 77   | 22.9723 | 4.66  |
| chr3L | 8424857 | 8425508 | Cbl     | 329  | 78.3002 | 8.63  |
| chr3L | 8427669 | 8428024 | Cbl     | 2909 | 53.0283 | 7.03  |
| chr3L | 8441216 | 8441516 | Unr     | 331  | 38.9058 | 6.05  |
| chr3L | 8441825 | 8442510 | Unr     | 31   | 23.7366 | 4.23  |
| chr3L | 8449774 | 8451117 | Gug     | 296  | 152.211 | 12.28 |
| chr3L | 8453525 | 8453821 | Gug     | 3032 | 12.1589 | 2.97  |
| chr3L | 8454976 | 8455369 | Gug     | 4521 | 19.3941 | 4.44  |
| chr3L | 8457544 | 8458308 | Gug     | 7374 | 185.253 | 16.68 |
| chr3L | 8506529 | 8507352 | CG43163 | 4    | 71.1808 | 7.50  |
| chr3L | 8512426 | 8513557 | CG6765  | 73   | 122.844 | 13.61 |
| chr3L | 8518641 | 8519211 | GstO3   | 95   | 264.002 | 15.47 |
| chr3L | 8523275 | 8523582 | GstO2   | 49   | 23.5371 | 4.77  |
| chr3L | 8525168 | 8525926 | foi     | 101  | 25.2255 | 4.28  |
| chr3L | 8528565 | 8528937 | foi     | 42   | 51.1616 | 7.67  |
| chr3L | 8534904 | 8535345 | ergic53 | 189  | 26.1113 | 4.64  |
| chr3L | 8546227 | 8546937 | rhea    | 82   | 316.742 | 28.15 |
| chr3L | 8547381 | 8547757 | rhea    | 921  | 24.6689 | 4.29  |
| chr3L | 8559727 | 8560414 | rhea    | 128  | 131.689 | 13.49 |
| chr3L | 8583200 | 8583991 | CG43078 | 138  | 31.9554 | 5.50  |
| chr3L | 8604049 | 8604852 | CG5989  | 484  | 47.2525 | 6.68  |
| chr3L | 8604049 | 8604852 | CG6282  | 23   | 47.2525 | 6.68  |
| chr3L | 8672691 | 8673179 | h       | 2805 | 298.97  | 24.83 |
| chr3L | 8675226 | 8676242 | h       | 51   | 135.434 | 12.04 |
| chr3L | 8692422 | 8692857 | CR44526 | 8    | 16.7281 | 3.68  |
| chr3L | 8693725 | 8694279 | CR44526 | 1255 | 116.553 | 12.31 |
| chr3L | 8696487 | 8696929 | CR44526 | 3938 | 32.8225 | 5.32  |
| chr3L | 8697887 | 8698387 | CR44526 | 5369 | 23.4481 | 4.56  |
| chr3L | 8700096 | 8701230 | CR44526 | 7886 | 31.08   | 5.72  |
| chr3L | 8741081 | 8741430 | Prm     | 2342 | 16.4023 | 4.23  |
| chr3L | 8765786 | 8766689 | Fhos    | 96   | 213.731 | 16.94 |
| chr3L | 8766995 | 8768208 | Fhos    | 752  | 22.0721 | 4.36  |
| chr3L | 8827148 | 8828125 | dally   | 79   | 316.742 | 22.38 |
| chr3L | 8912381 | 8913003 | Tsp66E  | 162  | 165.759 | 11.68 |
| chr3L | 8912381 | 8913003 | mfr     | 32   | 165.759 | 11.68 |
| chr3L | 8913703 | 8914322 | CR43970 | 1160 | 208.666 | 14.97 |
| chr3L | 8952508 | 8953397 | CG43783 | 4    | 22.835  | 4.39  |
| chr3L | 8952508 | 8953397 | orb2    | 4    | 22.835  | 4.39  |
| chr3L | 8954839 | 8955177 | GNBP3   | 6    | 27.2021 | 4.60  |
| chr3L | 8968500 | 8968979 | CG5026  | 153  | 7.88806 | 2.51  |
| chr3L | 8974361 | 8974839 | pix     | 115  | 50.9213 | 6.99  |
| chr3L | 8978628 | 8979166 | CG5644  | 956  | 212.096 | 16.69 |
| chr3L | 8979593 | 8980224 | CG5644  | 102  | 125.055 | 13.34 |
| chr3L | 8996937 | 8998469 | smg     | 26   | 144.166 | 12.22 |
| chr3L | 8996937 | 8998469 | CG5087  | 911  | 144.166 | 12.22 |
| chr3L | 9004641 | 9005405 | Doc3    | 176  | 164.677 | 15.60 |
| chr3L | 9019072 | 9019702 | Doc2    | 147  | 118.181 | 12.99 |
| chr3L | 9040981 | 9041560 | Doc1    | 143  | 67.6608 | 8.04  |
| chr3L | 9056169 | 9056915 | Argk    | 977  | 17.8861 | 3.75  |
| chr3L | 9057499 | 9058406 | Argk    | 166  | 122.403 | 11.29 |
| chr3L | 9059623 | 9060385 | Argk    | 2345 | 22.6881 | 4.36  |
| chr3L | 9064338 | 9064994 | Argk    | 1268 | 78.9815 | 9.00  |
| chr3L | 9065426 | 9066456 | Argk    | 3    | 161.013 | 14.33 |
| chr3L | 9072169 | 9072669 | CG4911  | 216  | 8.03147 | 2.49  |
| chr3L | 9124874 | 9125839 | bol     | 108  | 316.742 | 29.16 |
| chr3L | 9126898 | 9128248 | bol     | 2579 | 316.742 | 21.83 |
| chr3L | 9128734 | 9129105 | bol     | 1416 | 35.5108 | 6.39  |
| chr3L | 9129364 | 9129913 | bol     | 584  | 15.7078 | 4.07  |
| chr3L | 9134268 | 9135007 | bol     | 365  | 59.4095 | 7.45  |
| chr3L | 9134268 | 9135007 | Dhpr    | 4    | 59.4095 | 7.45  |
| chr3L | 9137531 | 9138041 | nwk     | 74   | 64.1011 | 7.06  |
| chr3L | 9171877 | 9172338 | Rdl     | 5342 | 11.6516 | 3.46  |
| chr3L | 9179142 | 9179910 | Rdl     | 106  | 189.765 | 19.81 |
| chr3L | 9181899 | 9182582 | Rdl     | 100  | 22.432  | 4.68  |
| chr3L | 9188132 | 9188599 | Rdl     | 6222 | 104.276 | 11.69 |
| chr3L | 9190057 | 9190589 | Rdl     | 8211 | 114.872 | 12.02 |
| chr3L | 9251611 | 9252123 | GluRIB  | 107  | 115.657 | 14.09 |
| chr3L | 9333764 | 9334513 | PGRP-LA | 62   | 143.209 | 13.13 |
| chr3L | 9335391 | 9336249 | PGRP-LA | 12   | 316.742 | 26.28 |
| chr3L | 9337782 | 9338351 | PGRP-LC | 737  | 225.151 | 18.21 |
| chr3L | 9339445 | 9341335 | PGRP-LC | 55   | 316.742 | 30.59 |
| chr3L | 9349274 | 9349883 | PGRP-LF | 37   | 43.1682 | 5.36  |
| chr3L | 9357482 | 9359092 | UGP     | 427  | 115.458 | 8.78  |
| chr3L | 9357482 | 9359092 | CG32039 | 490  | 115.458 | 8.78  |

|       |          |          |            |       |         |       |
|-------|----------|----------|------------|-------|---------|-------|
| chr3L | 9360246  | 9360792  | Pdxk       | 182   | 27.4894 | 4.10  |
| chr3L | 9366884  | 9367803  | Klp67A     | 22    | 15.1828 | 3.66  |
| chr3L | 9366884  | 9367803  | CG4452     | 403   | 15.1828 | 3.66  |
| chr3L | 9373384  | 9374204  | Hsp22      | 310   | 316.742 | 31.32 |
| chr3L | 9377093  | 9377932  | Hsp26      | 16    | 312.006 | 20.48 |
| chr3L | 9378480  | 9378752  | CR43481    | 434   | 13.0509 | 3.25  |
| chr3L | 9383381  | 9384272  | Hsp27      | 49    | 75.095  | 7.63  |
| chr3L | 9398565  | 9399358  | CG4080     | 39    | 33.0413 | 5.87  |
| chr3L | 9400834  | 9402553  | eIF-4E     | 163   | 316.742 | 32.55 |
| chr3L | 9410053  | 9411208  | CG4022     | 591   | 15.5923 | 3.43  |
| chr3L | 9410053  | 9411208  | CG3689     | 796   | 15.5923 | 3.43  |
| chr3L | 9419800  | 9420909  | CG3967     | 393   | 235.998 | 15.69 |
| chr3L | 9421814  | 9422304  | aay        | 1193  | 65.5209 | 6.99  |
| chr3L | 9422608  | 9423529  | aay        | 44    | 237.097 | 14.20 |
| chr3L | 9426326  | 9427026  | CG3967     | 71    | 13.5865 | 3.35  |
| chr3L | 9426326  | 9427026  | Shc        | 403   | 13.5865 | 3.35  |
| chr3L | 9429634  | 9430647  | RpS17      | 653   | 18.6655 | 3.67  |
| chr3L | 9429634  | 9430647  | MTF-1      | 163   | 18.6655 | 3.67  |
| chr3L | 9446842  | 9447853  | CG3529     | 215   | 63.8743 | 8.50  |
| chr3L | 9451924  | 9452208  | ghi        | 110   | 7.05709 | 2.29  |
| chr3L | 9455443  | 9456365  | phol       | 654   | 26.9291 | 4.61  |
| chr3L | 9455443  | 9456365  | CG3552     | 690   | 26.9291 | 4.61  |
| chr3L | 9455443  | 9456365  | CR45873    | 711   | 26.9291 | 4.61  |
| chr3L | 9460858  | 9461311  | CG44838    | 68    | 19.2027 | 3.64  |
| chr3L | 9461865  | 9462996  | CG44838    | 404   | 316.742 | 22.57 |
| chr3L | 9465434  | 9466508  | CG44838    | 2778  | 142.623 | 14.00 |
| chr3L | 9471575  | 9472003  | Uch-L5     | 5140  | 17.5268 | 4.29  |
| chr3L | 9477336  | 9478033  | Jarid2     | 484   | 23.769  | 4.62  |
| chr3L | 9503579  | 9503950  | path       | 1620  | 40.5664 | 6.99  |
| chr3L | 9505023  | 9506191  | path       | 36    | 149.841 | 15.61 |
| chr3L | 9508946  | 9509709  | CG3408     | 305   | 172.694 | 11.49 |
| chr3L | 9546721  | 9547476  | CG42673    | 124   | 316.742 | 29.58 |
| chr3L | 9614558  | 9615081  | LanB2      | 56    | 58.3536 | 7.44  |
| chr3L | 9675541  | 9676016  | fry        | 306   | 68.7237 | 8.59  |
| chr3L | 9678140  | 9678772  | fry        | 748   | 129.809 | 13.82 |
| chr3L | 9689795  | 9690122  | CR45804    | 3831  | 18.5598 | 4.13  |
| chr3L | 9692224  | 9695772  | CR45804    | 1057  | 316.742 | 37.52 |
| chr3L | 9692224  | 9695772  | CG6767     | 1694  | 316.742 | 37.52 |
| chr3L | 9692224  | 9695772  | CR45121    | 2279  | 316.742 | 37.52 |
| chr3L | 9692224  | 9695772  | CG6767     | 2678  | 316.742 | 37.52 |
| chr3L | 9696541  | 9697293  | CG6767     | 258   | 176.174 | 15.17 |
| chr3L | 9698342  | 9698905  | Ubc4       | 273   | 35.9945 | 5.67  |
| chr3L | 9704333  | 9704708  | CG16711    | 262   | 21.3369 | 4.34  |
| chr3L | 9713501  | 9714911  | SH3PX1     | 496   | 43.2363 | 6.36  |
| chr3L | 9713501  | 9714911  | vsg        | 0     | 43.2363 | 6.36  |
| chr3L | 9716809  | 9717312  | snmRNA:838 | 461   | 9.52296 | 2.69  |
| chr3L | 9751350  | 9751882  | CG42268    | 126   | 92.0504 | 8.48  |
| chr3L | 9760193  | 9760709  | CG42268    | 89    | 138.598 | 12.11 |
| chr3L | 9761800  | 9762425  | CR45407    | 1185  | 14.4441 | 3.27  |
| chr3L | 9773939  | 9774399  | CG8177     | 34    | 17.5222 | 4.36  |
| chr3L | 9786844  | 9787206  | CG32052    | 37    | 12.1308 | 3.77  |
| chr3L | 9851789  | 9852272  | RasGAP1    | 3350  | 10.8746 | 3.09  |
| chr3L | 9853638  | 9855389  | RasGAP1    | 1187  | 126.833 | 9.87  |
| chr3L | 9927157  | 9927676  | CG34356    | 65    | 22.3373 | 4.80  |
| chr3L | 9974406  | 9974787  | dpr6       | 33    | 31.6293 | 5.05  |
| chr3L | 10185987 | 10186396 | dpr10      | 85    | 40.2833 | 5.86  |
| chr3L | 10224722 | 10225212 | scramb1    | 350   | 10.6639 | 3.01  |
| chr3L | 10226004 | 10226445 | scramb1    | 920   | 53.8471 | 8.11  |
| chr3L | 10258848 | 10259119 | can        | 8118  | 10.3226 | 3.48  |
| chr3L | 10289241 | 10289838 | Or67d      | 16447 | 58.8054 | 8.36  |
| chr3L | 10306130 | 10306908 | CR46004    | 288   | 77.1282 | 10.56 |
| chr3L | 10307928 | 10308495 | CR46003    | 240   | 98.4315 | 11.99 |
| chr3L | 10321836 | 10322340 | CR46006    | 1389  | 40.1394 | 5.35  |
| chr3L | 10324887 | 10326072 | CR46006    | 1425  | 316.742 | 25.45 |
| chr3L | 10331494 | 10332706 | CR46006    | 128   | 88.5249 | 7.78  |
| chr3L | 10354758 | 10355086 | CR46006    | 9059  | 19.0903 | 4.13  |
| chr3L | 10363716 | 10364213 | CR46006    | 2     | 71.8886 | 6.39  |
| chr3L | 10368791 | 10369485 | mir-276a   | 3949  | 45.7154 | 7.08  |
| chr3L | 10407611 | 10408417 | CR44543    | 2975  | 18.9633 | 4.34  |
| chr3L | 10435481 | 10435742 | Ir67c      | 1504  | 9.50575 | 3.26  |
| chr3L | 10452801 | 10453119 | Gem3       | 10146 | 22.7222 | 4.81  |
| chr3L | 10500570 | 10500989 | S-Lap4     | 9941  | 72.7103 | 10.28 |
| chr3L | 10515790 | 10516965 | A2bp1      | 32    | 133.494 | 11.20 |
| chr3L | 10517476 | 10517885 | A2bp1      | 1784  | 15.3953 | 3.76  |
| chr3L | 10521524 | 10521929 | A2bp1      | 5724  | 30.3821 | 5.57  |

|       |          |          |                   |       |         |       |
|-------|----------|----------|-------------------|-------|---------|-------|
| chr3L | 10522425 | 10522806 | A2bp1             | 6638  | 32.1019 | 5.13  |
| chr3L | 10526575 | 10526867 | A2bp1             | 10764 | 18.1596 | 4.37  |
| chr3L | 10655744 | 10656045 | CG32066           | 4100  | 20.5555 | 4.78  |
| chr3L | 10658800 | 10659527 | CG32066           | 1021  | 33.3017 | 6.01  |
| chr3L | 10660240 | 10661136 | CG32066           | 38    | 38.7872 | 5.88  |
| chr3L | 10664398 | 10667033 | simj              | 770   | 316.742 | 19.49 |
| chr3L | 10669790 | 10670469 | simj              | 5231  | 23.514  | 4.63  |
| chr3L | 10674083 | 10674584 | simj              | 9604  | 127.262 | 12.84 |
| chr3L | 10675844 | 10676250 | simj              | 11287 | 40.8499 | 5.95  |
| chr3L | 10678574 | 10679128 | CG11811           | 12015 | 23.9005 | 4.71  |
| chr3L | 10680669 | 10681355 | CG11811           | 9984  | 316.742 | 25.83 |
| chr3L | 10681651 | 10684040 | CG11811           | 9053  | 316.742 | 31.16 |
| chr3L | 10696636 | 10697736 | NijA              | 3     | 218.496 | 16.67 |
| chr3L | 10708413 | 10709113 | NijA              | 11914 | 53.8471 | 8.11  |
| chr3L | 10724811 | 10725328 | NijA              | 28002 | 10.5384 | 3.20  |
| chr3L | 10736708 | 10740801 | CG43245           | 34717 | 316.742 | 47.44 |
| chr3L | 10742448 | 10743326 | CG43245           | 29014 | 316.742 | 21.94 |
| chr3L | 10748083 | 10748471 | CG43245           | 23630 | 34.7685 | 5.89  |
| chr3L | 10752792 | 10753160 | CG43245           | 18915 | 32.385  | 6.08  |
| chr3L | 10756059 | 10756603 | CG43245           | 15546 | 21.0144 | 4.88  |
| chr3L | 10775631 | 10777620 | CG43245           | 4227  | 316.742 | 22.40 |
| chr3L | 10810885 | 10811503 | CG42831           | 3674  | 57.7597 | 7.68  |
| chr3L | 10813314 | 10813577 | CG42831           | 1365  | 11.822  | 3.69  |
| chr3L | 10816864 | 10817356 | CR45247           | 558   | 21.8144 | 5.16  |
| chr3L | 10852202 | 10853510 | CR45169           | 1787  | 187.888 | 15.55 |
| chr3L | 10853906 | 10854857 | tna               | 3589  | 47.4773 | 7.14  |
| chr3L | 10856355 | 10858135 | tna               | 1032  | 316.742 | 28.54 |
| chr3L | 10866647 | 10868420 | tna               | 1939  | 288.401 | 17.96 |
| chr3L | 10869039 | 10869485 | tna               | 588   | 19.1824 | 4.20  |
| chr3L | 10881950 | 10882314 | CG6409            | 66    | 16.4323 | 3.98  |
| chr3L | 10885940 | 10886202 | CG6404            | 2     | 17.4372 | 3.97  |
| chr3L | 10897939 | 10899513 | Aps               | 122   | 144.074 | 11.22 |
| chr3L | 10970231 | 10970502 | CG14147           | 2263  | 16.6768 | 4.31  |
| chr3L | 10990011 | 10990667 | snoRNA:Me18S-G962 | 10966 | 9.34759 | 2.74  |
| chr3L | 11008817 | 11009762 | klu               | 101   | 316.742 | 30.25 |
| chr3L | 11010100 | 11011183 | klu               | 1238  | 316.742 | 41.18 |
| chr3L | 11046447 | 11047018 | CG43693           | 96    | 232.613 | 19.75 |
| chr3L | 11047962 | 11048221 | CG43693           | 858   | 21.9712 | 4.18  |
| chr3L | 11050276 | 11050905 | CR45119           | 156   | 48.851  | 7.31  |
| chr3L | 11050276 | 11050905 | CG43693           | 123   | 48.851  | 7.31  |
| chr3L | 11070298 | 11071103 | Mocs1             | 41    | 145.717 | 12.05 |
| chr3L | 11084297 | 11085199 | JIL-1             | 6925  | 185.136 | 14.78 |
| chr3L | 11092316 | 11093274 | JIL-1             | 277   | 74.685  | 6.96  |
| chr3L | 11096251 | 11096980 | CG33947           | 7     | 316.742 | 24.13 |
| chr3L | 11113306 | 11114038 | Sod               | 247   | 29.1313 | 4.70  |
| chr3L | 11118402 | 11120903 | FoxK              | 405   | 145.606 | 11.00 |
| chr3L | 11118402 | 11120903 | mRpL2             | 1975  | 145.606 | 11.00 |
| chr3L | 11123908 | 11124283 | NaPi-III          | 743   | 42.734  | 5.74  |
| chr3L | 11135851 | 11136268 | CG32082           | 27    | 61.8447 | 7.77  |
| chr3L | 11170021 | 11170308 | CG7616            | 127   | 12.0718 | 2.87  |
| chr3L | 11205685 | 11206136 | Plod              | 166   | 49.1249 | 5.90  |
| chr3L | 11214409 | 11216078 | CG42671           | 13    | 316.742 | 24.84 |
| chr3L | 11239378 | 11239718 | CR44718           | 1948  | 24.8381 | 4.90  |
| chr3L | 11242615 | 11243191 | CR44713           | 4070  | 316.742 | 37.01 |
| chr3L | 11245858 | 11246657 | CR44713           | 787   | 316.742 | 27.68 |
| chr3L | 11247343 | 11248536 | CR44715           | 351   | 316.742 | 22.17 |
| chr3L | 11247343 | 11248536 | CR44717           | 382   | 316.742 | 22.17 |
| chr3L | 11251781 | 11252573 | scyl              | 108   | 316.742 | 42.85 |
| chr3L | 11275622 | 11276357 | CR44720           | 1660  | 32.8668 | 5.60  |
| chr3L | 11285529 | 11285969 | CR45404           | 1038  | 44.0719 | 6.43  |
| chr3L | 11291080 | 11291632 | CG6175            | 3415  | 43.664  | 7.15  |
| chr3L | 11292033 | 11292656 | CG6175            | 2457  | 53.2638 | 6.49  |
| chr3L | 11293408 | 11293924 | CG6175            | 1180  | 40.3218 | 6.23  |
| chr3L | 11294453 | 11296114 | CG6175            | 130   | 316.742 | 28.13 |
| chr3L | 11296387 | 11297448 | CG6175            | 709   | 229.958 | 19.60 |
| chr3L | 11298834 | 11299418 | CG6175            | 3059  | 20.4943 | 4.54  |
| chr3L | 11364792 | 11365964 | CG6163            | 716   | 316.742 | 22.64 |
| chr3L | 11366418 | 11366897 | CG6163            | 1816  | 35.153  | 5.66  |
| chr3L | 11428282 | 11428860 | CG7560            | 3426  | 246.395 | 15.61 |
| chr3L | 11431023 | 11432202 | CG6149            | 4086  | 30.3262 | 5.14  |
| chr3L | 11487147 | 11488199 | chrB              | 106   | 316.742 | 31.06 |
| chr3L | 11492533 | 11492946 | chrB              | 1098  | 24.5089 | 4.83  |
| chr3L | 11493348 | 11493849 | chrB              | 299   | 109.504 | 9.57  |
| chr3L | 11523331 | 11523661 | CG11714           | 773   | 37.3645 | 5.45  |
| chr3L | 11523331 | 11523661 | Fuca              | 773   | 37.3645 | 5.45  |

|       |          |          |          |      |         |       |
|-------|----------|----------|----------|------|---------|-------|
| chr3L | 11523331 | 11523661 | CG11714  | 773  | 37.3645 | 5.45  |
| chr3L | 11532518 | 11533161 | Mob2     | 1658 | 17.2058 | 3.47  |
| chr3L | 11534219 | 11535442 | Mob2     | 113  | 316.742 | 40.31 |
| chr3L | 11536891 | 11537556 | Mob2     | 2628 | 149.682 | 11.94 |
| chr3L | 11552874 | 11553790 | Mob2     | 298  | 316.742 | 32.50 |
| chr3L | 11556130 | 11556462 | Mob2     | 2422 | 20.7671 | 4.53  |
| chr3L | 11557199 | 11557686 | Mob2     | 1293 | 134.543 | 12.88 |
| chr3L | 11561872 | 11562291 | CG7394   | 141  | 17.7074 | 4.08  |
| chr3L | 11561872 | 11562291 | Mob2     | 97   | 17.7074 | 4.08  |
| chr3L | 11586616 | 11588094 | rt       | 840  | 316.742 | 26.86 |
| chr3L | 11588475 | 11588911 | rt       | 864  | 19.8065 | 4.46  |
| chr3L | 11591728 | 11592796 | CR45442  | 766  | 42.061  | 7.43  |
| chr3L | 11591728 | 11592796 | CR45672  | 773  | 42.061  | 7.43  |
| chr3L | 11596451 | 11597380 | CG7368   | 499  | 140.352 | 11.87 |
| chr3L | 11599090 | 11600056 | CG14137  | 620  | 35.1247 | 6.04  |
| chr3L | 11601049 | 11601671 | CG7368   | 97   | 87.978  | 10.14 |
| chr3L | 11601992 | 11602419 | CG7368   | 783  | 50.5102 | 7.54  |
| chr3L | 11623429 | 11623939 | CG6084   | 2    | 118.639 | 10.14 |
| chr3L | 11629549 | 11629876 | mir-3642 | 201  | 14.6003 | 3.81  |
| chr3L | 11656470 | 11656984 | mir-274  | 195  | 41.1492 | 7.45  |
| chr3L | 11680134 | 11680644 | CG32085  | 128  | 45.3758 | 7.40  |
| chr3L | 11683958 | 11684493 | Sugb     | 271  | 16.9441 | 3.54  |
| chr3L | 11707750 | 11708628 | CG11658  | 291  | 316.742 | 40.74 |
| chr3L | 11714999 | 11715635 | CG14132  | 42   | 316.742 | 31.53 |
| chr3L | 11764932 | 11765465 | CG6024   | 620  | 77.725  | 9.59  |
| chr3L | 11765722 | 11766376 | CG6024   | 3    | 20.1137 | 4.46  |
| chr3L | 11776749 | 11777173 | CG14131  | 83   | 81.4122 | 10.93 |
| chr3L | 11788963 | 11790091 | Pi3K68D  | 755  | 90.6577 | 8.89  |
| chr3L | 11819475 | 11820285 | CG5946   | 75   | 316.742 | 22.31 |
| chr3L | 11821627 | 11822311 | CG11597  | 183  | 316.742 | 23.66 |
| chr3L | 11821627 | 11822311 | CG5946   | 183  | 316.742 | 23.66 |
| chr3L | 11821627 | 11822311 | CG11597  | 183  | 316.742 | 23.66 |
| chr3L | 11821627 | 11822311 | CG5946   | 253  | 316.742 | 23.66 |
| chr3L | 11821627 | 11822311 | CG11597  | 253  | 316.742 | 23.66 |
| chr3L | 11821627 | 11822311 | CG5946   | 253  | 316.742 | 23.66 |
| chr3L | 11862761 | 11863699 | CG44837  | 4    | 34.9443 | 6.66  |
| chr3L | 11918290 | 11918552 | CG11588  | 3115 | 18.7107 | 4.11  |
| chr3L | 11927227 | 11927669 | byn      | 233  | 44.0855 | 7.34  |
| chr3L | 11937258 | 11937513 | CG44837  | 1458 | 17.6329 | 4.46  |
| chr3L | 12002407 | 12003231 | Pop2     | 148  | 31.0683 | 5.20  |
| chr3L | 12002407 | 12003231 | CG6928   | 387  | 31.0683 | 5.20  |
| chr3L | 12040310 | 12040735 | CG6793   | 1919 | 16.8118 | 3.89  |
| chr3L | 12056186 | 12056871 | rols     | 22   | 316.742 | 33.96 |
| chr3L | 12081552 | 12082866 | Sema-5c  | 25   | 309.214 | 20.10 |
| chr3L | 12110993 | 12111308 | I(3)j2D3 | 4921 | 40.9426 | 7.29  |
| chr3L | 12124135 | 12124620 | yps      | 819  | 55.7668 | 6.01  |
| chr3L | 12124909 | 12125197 | yps      | 56   | 5.20568 | 2.08  |
| chr3L | 12146566 | 12147371 | Nrx-IV   | 633  | 267.108 | 18.27 |
| chr3L | 12163684 | 12164145 | CG9760   | 203  | 138.931 | 16.12 |
| chr3L | 12175413 | 12175833 | Rh7      | 131  | 20.3795 | 4.66  |
| chr3L | 12179769 | 12180091 | CAH2     | 100  | 14.7276 | 3.97  |
| chr3L | 12197519 | 12198018 | CG11529  | 92   | 62.2997 | 8.95  |
| chr3L | 12203334 | 12204067 | Adk1     | 47   | 26.1125 | 4.47  |
| chr3L | 12223240 | 12223494 | app      | 919  | 7.78943 | 2.99  |
| chr3L | 12265284 | 12266818 | app      | 186  | 64.1322 | 6.63  |
| chr3L | 12277474 | 12277857 | CG10426  | 14   | 29.9229 | 5.33  |
| chr3L | 12296144 | 12296439 | CG4328   | 144  | 22.5747 | 5.26  |
| chr3L | 12328807 | 12329200 | CG32105  | 278  | 18.5969 | 4.62  |
| chr3L | 12391230 | 12391593 | Ncc69    | 13   | 42.0673 | 7.55  |
| chr3L | 12407028 | 12407730 | CG32103  | 1250 | 196.712 | 13.45 |
| chr3L | 12408361 | 12408993 | CG32103  | 24   | 231.735 | 17.17 |
| chr3L | 12432440 | 12433108 | toe      | 168  | 76.7118 | 9.51  |
| chr3L | 12433632 | 12434923 | toe      | 1948 | 194.764 | 15.76 |
| chr3L | 12467795 | 12468545 | eyg      | 152  | 249.174 | 15.48 |
| chr3L | 12489810 | 12491328 | CG10660  | 107  | 316.742 | 34.94 |
| chr3L | 12489810 | 12491328 | CR45681  | 111  | 316.742 | 34.94 |
| chr3L | 12489810 | 12491328 | CG10660  | 494  | 316.742 | 34.94 |
| chr3L | 12503851 | 12504518 | CG10646  | 376  | 28.9242 | 5.28  |
| chr3L | 12503851 | 12504518 | vih      | 21   | 28.9242 | 5.28  |
| chr3L | 12514707 | 12516124 | sti      | 1027 | 282.775 | 18.54 |
| chr3L | 12514707 | 12516124 | CR45168  | 833  | 282.775 | 18.54 |
| chr3L | 12514707 | 12516124 | tral     | 784  | 282.775 | 18.54 |
| chr3L | 12529666 | 12530181 | nst      | 134  | 13.8873 | 3.41  |
| chr3L | 12580090 | 12580916 | ara      | 181  | 264.55  | 15.98 |
| chr3L | 12609093 | 12609845 | caup     | 133  | 316.742 | 25.06 |

|       |          |          |         |      |         |       |
|-------|----------|----------|---------|------|---------|-------|
| chr3L | 12627446 | 12628204 | CR32111 | 83   | 316.742 | 28.56 |
| chr3L | 12653083 | 12653550 | CR43431 | 253  | 110.612 | 9.41  |
| chr3L | 12692651 | 12693900 | mirr    | 212  | 316.742 | 29.49 |
| chr3L | 12788510 | 12788846 | CG42709 | 1505 | 22.3373 | 4.80  |
| chr3L | 12789812 | 12790520 | CG42709 | 0    | 316.742 | 20.76 |
| chr3L | 12790948 | 12791460 | CG42709 | 32   | 316.742 | 23.05 |
| chr3L | 12798506 | 12799478 | Atg1    | 6211 | 14.4209 | 3.38  |
| chr3L | 12804128 | 12805244 | Atg1    | 570  | 316.742 | 29.23 |
| chr3L | 12805892 | 12806741 | Sap130  | 57   | 112.489 | 8.69  |
| chr3L | 12832336 | 12832817 | CG10960 | 32   | 87.1962 | 11.46 |
| chr3L | 12834105 | 12834663 | CG10960 | 1884 | 16.0203 | 4.14  |
| chr3L | 12842864 | 12843691 | CG10960 | 15   | 31.4376 | 5.88  |
| chr3L | 12849853 | 12850318 | CG10948 | 93   | 13.3268 | 3.26  |
| chr3L | 12849853 | 12850318 | Wbp2    | 46   | 13.3268 | 3.26  |
| chr3L | 12892409 | 12892922 | CG14118 | 29   | 115.985 | 12.09 |
| chr3L | 12913797 | 12914285 | CG32115 | 392  | 316.742 | 22.18 |
| chr3L | 13022384 | 13022798 | AdenoK  | 155  | 20.4566 | 3.83  |
| chr3L | 13023251 | 13023577 | RpS12   | 73   | 12.1589 | 2.97  |
| chr3L | 13032081 | 13032684 | CR45157 | 529  | 22.3712 | 5.04  |
| chr3L | 13044238 | 13044777 | Syx13   | 32   | 30.4913 | 4.87  |
| chr3L | 13113658 | 13114570 | trn     | 151  | 316.742 | 25.90 |
| chr3L | 13227469 | 13229009 | caps    | 120  | 316.742 | 31.25 |
| chr3L | 13235927 | 13237234 | caps    | 8363 | 32.1482 | 5.33  |
| chr3L | 13403439 | 13403925 | sens    | 2568 | 73.6749 | 10.09 |
| chr3L | 13426383 | 13426812 | CG14105 | 36   | 12.1935 | 3.38  |
| chr3L | 13435045 | 13435600 | CG10713 | 173  | 77.2515 | 8.63  |
| chr3L | 13442537 | 13442886 | cmb     | 57   | 12.5224 | 3.68  |
| chr3L | 13474674 | 13475162 | CG10089 | 45   | 54.2892 | 7.33  |
| chr3L | 13476474 | 13478666 | stv     | 186  | 316.742 | 47.72 |
| chr3L | 13479519 | 13480824 | stv     | 120  | 165.562 | 13.46 |
| chr3L | 13494351 | 13495445 | Tgi     | 476  | 90.7138 | 8.67  |
| chr3L | 13497327 | 13498509 | Tgi     | 2127 | 131.436 | 11.18 |
| chr3L | 13502577 | 13503021 | Spt20   | 188  | 10.1576 | 2.69  |
| chr3L | 13666721 | 13668092 | bru-3   | 719  | 101.273 | 10.20 |
| chr3L | 13803270 | 13804277 | bru-3   | 663  | 24.7508 | 5.18  |
| chr3L | 13840726 | 13841125 | CR46266 | 280  | 28.5516 | 5.14  |
| chr3L | 13901741 | 13902477 | dysc    | 1139 | 102.715 | 11.06 |
| chr3L | 13902969 | 13903885 | dysc    | 41   | 52.5077 | 7.19  |
| chr3L | 13904314 | 13904953 | dysc    | 1399 | 130.365 | 11.13 |
| chr3L | 13917630 | 13918349 | Rgl     | 1741 | 9.98162 | 2.87  |
| chr3L | 13919310 | 13920775 | Rgl     | 77   | 316.742 | 39.58 |
| chr3L | 13922116 | 13922474 | Rgl     | 14   | 20.7834 | 4.35  |
| chr3L | 13922804 | 13923215 | Rgl     | 684  | 89.9897 | 9.86  |
| chr3L | 13923634 | 13924273 | Rgl     | 1222 | 45.6556 | 6.89  |
| chr3L | 13925059 | 13925706 | Rgl     | 89   | 316.742 | 29.86 |
| chr3L | 13934829 | 13935357 | CG32137 | 4196 | 172.805 | 15.91 |
| chr3L | 13938327 | 13939553 | CG32137 | 636  | 286.554 | 19.66 |
| chr3L | 13991231 | 13991951 | CG17364 | 1882 | 105.849 | 11.15 |
| chr3L | 13993209 | 13993747 | CG17364 | 134  | 125.501 | 12.31 |
| chr3L | 14002050 | 14003283 | upSET   | 815  | 150.784 | 12.00 |
| chr3L | 14003558 | 14007009 | upSET   | 2092 | 116.618 | 8.27  |
| chr3L | 14028552 | 14029119 | Ptip    | 418  | 11.597  | 2.82  |
| chr3L | 14030984 | 14031694 | endos   | 147  | 30.3217 | 4.95  |
| chr3L | 14030984 | 14031694 | CG6650  | 229  | 30.3217 | 4.95  |
| chr3L | 14036945 | 14038666 | Hsc70Cb | 1114 | 316.742 | 25.37 |
| chr3L | 14052999 | 14053504 | CG13484 | 169  | 32.6391 | 5.10  |
| chr3L | 14052999 | 14053504 | CG32138 | 34   | 32.6391 | 5.10  |
| chr3L | 14055041 | 14055411 | CR46067 | 933  | 45.6428 | 7.06  |
| chr3L | 14055709 | 14056332 | CR46067 | 1767 | 226.124 | 20.34 |
| chr3L | 14059622 | 14059964 | CR46067 | 5516 | 22.6835 | 4.48  |
| chr3L | 14063716 | 14064341 | Pex1    | 7764 | 65.6742 | 7.98  |
| chr3L | 14071686 | 14072115 | Pex1    | 50   | 44.3082 | 5.85  |
| chr3L | 14109771 | 14110163 | Sox21a  | 1835 | 30.6062 | 6.26  |
| chr3L | 14131223 | 14132186 | Sox21b  | 481  | 206.658 | 15.01 |
| chr3L | 14177391 | 14178407 | D       | 157  | 316.742 | 21.75 |
| chr3L | 14190715 | 14191070 | nuf     | 28   | 23.3849 | 3.67  |
| chr3L | 14200902 | 14201408 | CG32141 | 2104 | 180.075 | 17.68 |
| chr3L | 14205087 | 14205597 | nuf     | 139  | 185.253 | 16.68 |
| chr3L | 14219557 | 14220072 | nuf     | 94   | 144.088 | 11.56 |
| chr3L | 14221043 | 14221540 | nuf     | 102  | 45.6836 | 7.26  |
| chr3L | 14272098 | 14273467 | fz      | 1353 | 316.742 | 27.39 |
| chr3L | 14273864 | 14274608 | fz      | 126  | 316.742 | 59.79 |
| chr3L | 14409367 | 14410963 | stwl    | 533  | 316.742 | 21.79 |
| chr3L | 14409367 | 14410963 | CG3919  | 153  | 316.742 | 21.79 |
| chr3L | 14409367 | 14410963 | CR45233 | 226  | 316.742 | 21.79 |

|       |          |          |           |       |         |       |
|-------|----------|----------|-----------|-------|---------|-------|
| chr3L | 14427139 | 14427774 | bbg       | 142   | 189.099 | 13.78 |
| chr3L | 14448389 | 14448989 | bbg       | 127   | 316.742 | 31.70 |
| chr3L | 14449388 | 14449709 | bbg       | 979   | 20.9131 | 4.43  |
| chr3L | 14450540 | 14450883 | bbg       | 2146  | 25.3934 | 5.59  |
| chr3L | 14476600 | 14477403 | bbg       | 280   | 316.742 | 32.84 |
| chr3L | 14537459 | 14537976 | Mpcp      | 5     | 30.6488 | 4.45  |
| chr3L | 14544000 | 14544309 | Mpcp      | 6421  | 14.0377 | 3.80  |
| chr3L | 14550709 | 14551614 | Gbs-70E   | 359   | 170.068 | 13.38 |
| chr3L | 14552712 | 14553065 | Gbs-70E   | 1902  | 16.7774 | 4.12  |
| chr3L | 14578881 | 14579355 | CG42758   | 11700 | 65.7447 | 7.51  |
| chr3L | 14599506 | 14599893 | HGTX      | 134   | 38.288  | 6.70  |
| chr3L | 14600628 | 14600971 | HGTX      | 1229  | 32.7876 | 6.27  |
| chr3L | 14613329 | 14613788 | shd       | 804   | 14.4803 | 3.62  |
| chr3L | 14614075 | 14614516 | shd       | 94    | 21.1336 | 4.19  |
| chr3L | 14622469 | 14623462 | CG9628    | 27    | 138.18  | 10.57 |
| chr3L | 14624314 | 14625360 | CG9628    | 1786  | 135.029 | 12.50 |
| chr3L | 14632465 | 14632773 | dlp       | 1     | 31.0549 | 5.41  |
| chr3L | 14672592 | 14673025 | ome       | 51    | 89.295  | 10.84 |
| chr3L | 14681563 | 14682145 | CG5048    | 3016  | 111.154 | 11.38 |
| chr3L | 14706341 | 14707031 | ome       | 70    | 316.742 | 17.60 |
| chr3L | 14731566 | 14731851 | CG13471   | 1825  | 16.2987 | 4.14  |
| chr3L | 14743195 | 14743697 | CG13471   | 9958  | 60.7841 | 7.35  |
| chr3L | 14754695 | 14760494 | Trl       | 782   | 316.742 | 47.51 |
| chr3L | 14754695 | 14760494 | CG42507   | 1408  | 316.742 | 47.51 |
| chr3L | 14754695 | 14760494 | Trl       | 1408  | 316.742 | 47.51 |
| chr3L | 14775680 | 14776173 | mop       | 213   | 88.1317 | 9.19  |
| chr3L | 14781091 | 14781410 | mop       | 5124  | 36.1832 | 6.09  |
| chr3L | 14785280 | 14786897 | bmm       | 840   | 304.972 | 18.02 |
| chr3L | 14785280 | 14786897 | Tdrd3     | 1218  | 304.972 | 18.02 |
| chr3L | 14804680 | 14805336 | CG17839   | 11    | 67.6809 | 6.62  |
| chr3L | 14819217 | 14819892 | CG17839   | 14630 | 19.9971 | 3.94  |
| chr3L | 14843512 | 14843905 | CG17839   | 38648 | 18.7287 | 4.06  |
| chr3L | 14984734 | 14985119 | mnd       | 188   | 41.8878 | 6.60  |
| chr3L | 14986960 | 14987660 | mnd       | 121   | 118.302 | 11.37 |
| chr3L | 14992031 | 14992384 | Zip71B    | 75    | 44.1734 | 7.46  |
| chr3L | 15006482 | 15006952 | Prosbeta2 | 6891  | 11.9679 | 3.48  |
| chr3L | 15079281 | 15079741 | Plp       | 78    | 101.329 | 12.73 |
| chr3L | 15094147 | 15094743 | sstn      | 283   | 88.1004 | 7.92  |
| chr3L | 15094147 | 15094743 | Plp       | 288   | 88.1004 | 7.92  |
| chr3L | 15098533 | 15099785 | CR43973   | 216   | 316.742 | 23.78 |
| chr3L | 15101484 | 15101901 | CR43973   | 2164  | 30.1541 | 5.86  |
| chr3L | 15104094 | 15105933 | CTPsyn    | 1401  | 80.8688 | 9.32  |
| chr3L | 15104094 | 15105933 | CG45071   | 1401  | 80.8688 | 9.32  |
| chr3L | 15107549 | 15108549 | CR43971   | 812   | 11.3903 | 3.51  |
| chr3L | 15125188 | 15125619 | CG16959   | 74    | 38.7959 | 6.91  |
| chr3L | 15141344 | 15142796 | CR45396   | 212   | 275.764 | 17.63 |
| chr3L | 15141344 | 15142796 | Pdi       | 674   | 275.764 | 17.63 |
| chr3L | 15146691 | 15147263 | FucTA     | 279   | 57.3599 | 7.88  |
| chr3L | 15231046 | 15231427 | Tollo     | 4378  | 26.1893 | 5.17  |
| chr3L | 15234003 | 15234829 | Tollo     | 1114  | 243.413 | 18.15 |
| chr3L | 15235174 | 15235910 | Tollo     | 46    | 316.742 | 28.68 |
| chr3L | 15304067 | 15304737 | CG7255    | 6     | 25.2621 | 5.13  |
| chr3L | 15329507 | 15329976 | CR43247   | 2538  | 111.13  | 12.33 |
| chr3L | 15336238 | 15336861 | Toll-6    | 91    | 57.7848 | 6.96  |
| chr3L | 15493857 | 15494306 | CG12355   | 236   | 80.8129 | 10.06 |
| chr3L | 15500737 | 15501908 | CG7272    | 131   | 148.657 | 10.98 |
| chr3L | 15507376 | 15508474 | CG7841    | 587   | 316.742 | 23.19 |
| chr3L | 15510633 | 15511288 | Eip71CD   | 75    | 316.742 | 25.68 |
| chr3L | 15511607 | 15512140 | Eip71CD   | 16    | 207.132 | 15.61 |
| chr3L | 15514302 | 15514819 | CG13454   | 2498  | 316.742 | 27.62 |
| chr3L | 15532148 | 15532846 | CG43248   | 1040  | 316.742 | 19.58 |
| chr3L | 15533457 | 15536069 | CrebA     | 66    | 316.742 | 29.22 |
| chr3L | 15540497 | 15541411 | CrebA     | 5671  | 86.0194 | 10.23 |
| chr3L | 15554126 | 15554584 | AGO2      | 282   | 18.1042 | 3.66  |
| chr3L | 15566018 | 15566986 | dop       | 822   | 24.3352 | 4.44  |
| chr3L | 15588041 | 15588475 | CG7656    | 53    | 93.6892 | 8.77  |
| chr3L | 15588732 | 15589395 | RhoGAP71E | 284   | 82.8228 | 7.91  |
| chr3L | 15593441 | 15593726 | RhoGAP71E | 4702  | 19.9542 | 4.36  |
| chr3L | 15619609 | 15620268 | CG7372    | 1     | 233.347 | 20.04 |
| chr3L | 15625193 | 15626553 | CR45977   | 3089  | 316.742 | 35.55 |
| chr3L | 15647032 | 15647363 | comm3     | 593   | 18.7287 | 4.06  |
| chr3L | 15683643 | 15684947 | pgant8    | 439   | 316.742 | 26.94 |
| chr3L | 15699506 | 15700444 | comm2     | 91    | 246.936 | 21.51 |
| chr3L | 15728130 | 15728792 | comm      | 6     | 316.742 | 20.02 |
| chr3L | 15729121 | 15729808 | comm      | 1015  | 316.742 | 35.95 |

|       |          |          |          |      |         |       |
|-------|----------|----------|----------|------|---------|-------|
| chr3L | 15743424 | 15743684 | CR45240  | 3860 | 14.0698 | 3.75  |
| chr3L | 15745264 | 15745683 | CR45240  | 1858 | 19.5329 | 4.47  |
| chr3L | 15815183 | 15816430 | fwe      | 660  | 200.718 | 15.59 |
| chr3L | 15824496 | 15824791 | DCP2     | 445  | 10.9339 | 3.03  |
| chr3L | 15825423 | 15826483 | DCP2     | 654  | 316.742 | 19.98 |
| chr3L | 15826904 | 15827162 | dbo      | 105  | 10.3932 | 2.99  |
| chr3L | 15898813 | 15899189 | pHCl     | 46   | 27.8702 | 4.95  |
| chr3L | 15920930 | 15921329 | sff      | 3739 | 32.2995 | 6.46  |
| chr3L | 15924494 | 15925177 | sff      | 55   | 148.112 | 14.71 |
| chr3L | 15975266 | 15975588 | CG17026  | 72   | 19.4612 | 4.20  |
| chr3L | 15976168 | 15976489 | CG17029  | 540  | 29.3863 | 4.97  |
| chr3L | 15976816 | 15977130 | CG17029  | 31   | 36.0308 | 5.90  |
| chr3L | 15979379 | 15980569 | CG17027  | 87   | 118.716 | 9.62  |
| chr3L | 15982645 | 15983281 | brm      | 231  | 22.2506 | 4.18  |
| chr3L | 15982645 | 15983281 | Arl1     | 34   | 22.2506 | 4.18  |
| chr3L | 15988226 | 15988702 | Hip14    | 235  | 82.9844 | 9.19  |
| chr3L | 15996508 | 15996820 | CG5830   | 8110 | 27.5528 | 5.09  |
| chr3L | 15997095 | 15997374 | CG5830   | 7530 | 14.2819 | 3.80  |
| chr3L | 16000869 | 16002977 | CG5830   | 3567 | 121.735 | 10.31 |
| chr3L | 16004120 | 16004771 | CG5830   | 235  | 42.9314 | 5.59  |
| chr3L | 16011069 | 16011939 | mib1     | 337  | 42.6855 | 5.61  |
| chr3L | 16023115 | 16023686 | Notum    | 107  | 304.374 | 17.56 |
| chr3L | 16025953 | 16026550 | Notum    | 2659 | 84.7575 | 10.22 |
| chr3L | 16026827 | 16027597 | Notum    | 3888 | 48.851  | 7.31  |
| chr3L | 16028855 | 16029494 | mir-4941 | 1991 | 142.137 | 15.48 |
| chr3L | 16041283 | 16041697 | CR45889  | 843  | 15.0681 | 3.69  |
| chr3L | 16045755 | 16046022 | Diap1    | 944  | 16.5691 | 3.84  |
| chr3L | 16046299 | 16047497 | Diap1    | 125  | 235.22  | 14.66 |
| chr3L | 16049848 | 16051121 | Diap1    | 106  | 155.032 | 12.77 |
| chr3L | 16051802 | 16053313 | Mbs      | 600  | 316.742 | 28.79 |
| chr3L | 16113190 | 16113945 | Taf4     | 28   | 15.2559 | 3.41  |
| chr3L | 16128480 | 16128793 | Pgm      | 103  | 10.0813 | 2.70  |
| chr3L | 16149332 | 16151060 | CG5151   | 223  | 35.8567 | 5.65  |
| chr3L | 16151573 | 16152022 | CG5151   | 2491 | 14.3655 | 3.70  |
| chr3L | 16153134 | 16153674 | CG5151   | 4078 | 79.0434 | 8.92  |
| chr3L | 16162075 | 16162479 | CG5151   | 2425 | 23.7856 | 4.62  |
| chr3L | 16163961 | 16165057 | CG5151   | 338  | 316.742 | 31.59 |
| chr3L | 16166158 | 16166673 | CG5151   | 1720 | 61.9574 | 8.34  |
| chr3L | 16191009 | 16191296 | CR45437  | 6033 | 8.39622 | 2.96  |
| chr3L | 16241191 | 16241769 | I(3)72Dr | 3720 | 64.6194 | 7.97  |
| chr3L | 16252218 | 16252646 | CG13055  | 94   | 86.9274 | 9.95  |
| chr3L | 16254837 | 16255266 | CG13054  | 2115 | 63.4027 | 9.43  |
| chr3L | 16257081 | 16257507 | CG13054  | 100  | 29.8684 | 6.08  |
| chr3L | 16298819 | 16299432 | CG4982   | 2284 | 21.8144 | 5.16  |
| chr3L | 16317753 | 16318106 | Nplp3    | 90   | 31.0002 | 5.78  |
| chr3L | 16334806 | 16335165 | CG13056  | 1683 | 27.3778 | 4.38  |
| chr3L | 16368170 | 16368556 | CG4842   | 49   | 40.4034 | 7.17  |
| chr3L | 16377807 | 16378669 | roq      | 502  | 52.2193 | 6.47  |
| chr3L | 16385346 | 16385902 | CG4729   | 282  | 28.0227 | 4.58  |
| chr3L | 16392527 | 16392952 | CG44836  | 940  | 8.5771  | 3.16  |
| chr3L | 16407987 | 16412025 | fax      | 391  | 298.178 | 17.72 |
| chr3L | 16451938 | 16452385 | dsx-c73A | 208  | 61.8783 | 9.48  |
| chr3L | 16478753 | 16479069 | aos      | 4720 | 12.0357 | 3.62  |
| chr3L | 16480677 | 16481155 | aos      | 2649 | 33.0785 | 5.43  |
| chr3L | 16482925 | 16484510 | aos      | 577  | 316.742 | 23.12 |
| chr3L | 16572059 | 16572692 | Mipp1    | 11   | 316.742 | 25.60 |
| chr3L | 16588161 | 16588578 | I(3)73Ah | 140  | 10.3415 | 2.84  |
| chr3L | 16590854 | 16591121 | tra      | 101  | 12.359  | 3.64  |
| chr3L | 16644564 | 16645008 | Abl      | 3064 | 65.3291 | 8.37  |
| chr3L | 16645517 | 16646048 | Abl      | 2113 | 46.1634 | 6.49  |
| chr3L | 16646892 | 16648046 | Abl      | 157  | 97.6439 | 8.92  |
| chr3L | 16659899 | 16661864 | Baldspot | 823  | 237.216 | 15.74 |
| chr3L | 16680628 | 16680886 | CG13032  | 6792 | 15.6905 | 3.83  |
| chr3L | 16710600 | 16710942 | Lasp     | 914  | 17.9513 | 3.81  |
| chr3L | 16710600 | 16710942 | CG43954  | 914  | 17.9513 | 3.81  |
| chr3L | 16711367 | 16711849 | Lasp     | 19   | 42.1942 | 5.23  |
| chr3L | 16711367 | 16711849 | CG43954  | 19   | 42.1942 | 5.23  |
| chr3L | 16713502 | 16714431 | Dab      | 216  | 270.962 | 16.64 |
| chr3L | 16733325 | 16733677 | CG9701   | 20   | 37.3852 | 6.33  |
| chr3L | 16745651 | 16746061 | CG42852  | 9712 | 40.9662 | 6.60  |
| chr3L | 16746389 | 16746843 | CG42852  | 8847 | 24.119  | 4.82  |
| chr3L | 16765614 | 16766350 | Nrt      | 9    | 92.0459 | 9.71  |
| chr3L | 16780069 | 16780829 | CG9705   | 66   | 30.5855 | 5.12  |
| chr3L | 16796431 | 16796858 | CG9674   | 3529 | 56.1154 | 7.56  |
| chr3L | 16799956 | 16800776 | CG9674   | 82   | 316.742 | 29.03 |

|       |          |          |                   |       |         |       |
|-------|----------|----------|-------------------|-------|---------|-------|
| chr3L | 16801413 | 16801733 | CG9674            | 1367  | 29.2914 | 5.36  |
| chr3L | 16805812 | 16806808 | nudC              | 1512  | 61.4595 | 7.16  |
| chr3L | 16807133 | 16807950 | CG9674            | 30    | 73.3768 | 8.12  |
| chr3L | 16811821 | 16812250 | CG13024           | 31    | 41.8221 | 6.68  |
| chr3L | 16835157 | 16835631 | CG13024           | 6392  | 17.7908 | 4.22  |
| chr3L | 16845155 | 16845860 | CG9715            | 34    | 145.297 | 11.72 |
| chr3L | 16853710 | 16854175 | sina              | 116   | 6.11748 | 2.25  |
| chr3L | 16877030 | 16877661 | CG32170           | 12    | 90.1613 | 9.24  |
| chr3L | 16886452 | 16886878 | Lmpt              | 484   | 35.5108 | 6.39  |
| chr3L | 16890792 | 16891441 | Lmpt              | 95    | 98.6901 | 8.91  |
| chr3L | 16910990 | 16911317 | Lmpt              | 144   | 29.0461 | 5.98  |
| chr3L | 16915978 | 16916469 | Lmpt              | 49    | 142.965 | 14.19 |
| chr3L | 16969577 | 16970212 | Exn               | 120   | 256.641 | 21.29 |
| chr3L | 16985632 | 16987198 | Exn               | 2     | 316.742 | 28.31 |
| chr3L | 16989441 | 16989751 | Exn               | 2973  | 17.5552 | 3.78  |
| chr3L | 17003623 | 17005389 | CG3764            | 2194  | 82.1817 | 8.17  |
| chr3L | 17009983 | 17010603 | CG3764            | 2276  | 209.338 | 12.56 |
| chr3L | 17010922 | 17012718 | CG3764            | 441   | 135.323 | 10.93 |
| chr3L | 17015750 | 17016031 | CG6664            | 187   | 10.3936 | 2.95  |
| chr3L | 17031919 | 17032484 | llp8              | 99    | 211.635 | 19.13 |
| chr3L | 17051241 | 17051510 | rogdi             | 49    | 13.8108 | 3.27  |
| chr3L | 17147816 | 17148371 | Rbp6              | 184   | 78.7529 | 9.56  |
| chr3L | 17148717 | 17149197 | Rbp6              | 973   | 191.3   | 16.08 |
| chr3L | 17149662 | 17150377 | Rbp6              | 2029  | 105.354 | 10.17 |
| chr3L | 17153269 | 17153563 | Rbp6              | 5401  | 9.74428 | 3.38  |
| chr3L | 17211574 | 17212060 | Rbp6              | 26416 | 89.0402 | 11.30 |
| chr3L | 17237928 | 17238685 | Rbp6              | 228   | 154.827 | 15.51 |
| chr3L | 17379275 | 17379806 | Cad74A            | 39    | 143.877 | 11.36 |
| chr3L | 17400536 | 17401720 | noe               | 190   | 41.1495 | 6.30  |
| chr3L | 17415538 | 17416121 | blot              | 10    | 101.376 | 10.52 |
| chr3L | 17421186 | 17422088 | blot              | 41    | 316.742 | 29.87 |
| chr3L | 17432903 | 17433201 | CG32174           | 200   | 9.07558 | 2.63  |
| chr3L | 17432903 | 17433201 | frc               | 200   | 9.07558 | 2.63  |
| chr3L | 17438592 | 17439508 | CG18265           | 81    | 70.8229 | 8.86  |
| chr3L | 17444628 | 17444924 | CG18265           | 1734  | 12.7565 | 3.87  |
| chr3L | 17469948 | 17470537 | CG7589            | 41    | 42.2125 | 6.58  |
| chr3L | 17474926 | 17475280 | UQCR-Q            | 4     | 12.7356 | 2.98  |
| chr3L | 17475873 | 17476285 | CG34250           | 220   | 14.4244 | 3.34  |
| chr3L | 17485832 | 17486087 | CG6333            | 318   | 7.79053 | 2.50  |
| chr3L | 17486820 | 17487830 | Oatp74D           | 191   | 316.742 | 23.73 |
| chr3L | 17499378 | 17501014 | edin              | 5540  | 316.742 | 27.22 |
| chr3L | 17529647 | 17530245 | Edc3              | 218   | 13.0314 | 3.13  |
| chr3L | 17529647 | 17530245 | Nedd4             | 1     | 13.0314 | 3.13  |
| chr3L | 17529647 | 17530245 | CR45165           | 123   | 13.0314 | 3.13  |
| chr3L | 17532828 | 17534084 | Nedd4             | 50    | 226.326 | 14.08 |
| chr3L | 17534407 | 17534898 | Nedd4             | 931   | 61.5213 | 7.47  |
| chr3L | 17551067 | 17551442 | CG7542            | 1419  | 26.8073 | 5.15  |
| chr3L | 17552166 | 17552556 | CG7542            | 2481  | 20.8397 | 3.94  |
| chr3L | 17557067 | 17557817 | CycT              | 526   | 35.079  | 5.58  |
| chr3L | 17563234 | 17564317 | snoRNA:Me28S-A576 | 2373  | 316.742 | 45.49 |
| chr3L | 17566419 | 17567433 | snoRNA:Me28S-A576 | 564   | 146.226 | 12.41 |
| chr3L | 17569922 | 17570415 | snoRNA:Me28S-A576 | 3982  | 79.2696 | 10.11 |
| chr3L | 17571899 | 17572708 | Eip74EF           | 3976  | 316.742 | 23.03 |
| chr3L | 17573360 | 17574422 | Eip74EF           | 2287  | 316.742 | 26.18 |
| chr3L | 17576088 | 17578493 | Eip74EF           | 1266  | 316.742 | 31.84 |
| chr3L | 17584080 | 17585147 | Eip74EF           | 8258  | 169.386 | 13.29 |
| chr3L | 17586198 | 17586813 | Eip74EF           | 9954  | 34.15   | 6.10  |
| chr3L | 17588132 | 17588799 | Eip74EF           | 11741 | 77.1631 | 9.82  |
| chr3L | 17590257 | 17591311 | Eip74EF           | 14243 | 316.742 | 41.08 |
| chr3L | 17602102 | 17602379 | Eip74EF           | 17041 | 20.758  | 4.53  |
| chr3L | 17603682 | 17604402 | Eip74EF           | 15372 | 278.846 | 17.71 |
| chr3L | 17606611 | 17607412 | Eip74EF           | 12318 | 316.742 | 30.87 |
| chr3L | 17611642 | 17612692 | Eip74EF           | 7163  | 316.742 | 35.53 |
| chr3L | 17616674 | 17617458 | Eip74EF           | 2198  | 269.404 | 17.15 |
| chr3L | 17618995 | 17619764 | Eip74EF           | 129   | 316.742 | 38.67 |
| chr3L | 17638089 | 17638369 | CG7497            | 4768  | 17.3238 | 3.74  |
| chr3L | 17644203 | 17645105 | Pep               | 536   | 35.0192 | 4.74  |
| chr3L | 17653126 | 17654420 | Krn               | 735   | 133.901 | 11.16 |
| chr3L | 17653126 | 17654420 | Ndfip             | 735   | 133.901 | 11.16 |
| chr3L | 17658285 | 17659777 | CG7484            | 4642  | 105.34  | 10.08 |
| chr3L | 17665085 | 17665858 | snmRNA:641        | 3246  | 17.2947 | 3.83  |
| chr3L | 17667860 | 17669812 | snmRNA:641        | 245   | 127.869 | 11.72 |
| chr3L | 17667860 | 17669812 | Crtc              | 259   | 127.869 | 11.72 |
| chr3L | 17740358 | 17740888 | CG7460            | 24    | 44.4712 | 7.32  |
| chr3L | 17841009 | 17841658 | CG5577            | 109   | 316.742 | 30.73 |



|       |          |          |                  |       |         |       |
|-------|----------|----------|------------------|-------|---------|-------|
| chr3L | 17843071 | 17843467 | CG5567           | 428   | 10.52   | 3.24  |
| chr3L | 17846149 | 17846573 | MED19            | 95    | 29.2213 | 4.30  |
| chr3L | 17846991 | 17847342 | CG7430           | 110   | 11.4471 | 3.09  |
| chr3L | 17856516 | 17857654 | CG5535           | 623   | 187.66  | 13.59 |
| chr3L | 17878799 | 17879221 | CG7408           | 103   | 87.9623 | 9.62  |
| chr3L | 17895567 | 17896219 | Tsp74F           | 61    | 178.412 | 14.25 |
| chr3L | 17907548 | 17907956 | Prestin          | 43    | 40.7545 | 5.80  |
| chr3L | 17913960 | 17914492 | CG5290           | 1666  | 316.742 | 23.85 |
| chr3L | 17922287 | 17922627 | CG5290           | 9802  | 6.6678  | 2.67  |
| chr3L | 17927875 | 17928513 | CR43174          | 5662  | 19.9502 | 4.56  |
| chr3L | 17929985 | 17930571 | CR43174          | 3681  | 54.102  | 6.55  |
| chr3L | 17947173 | 17947767 | CR45393          | 300   | 287.378 | 19.90 |
| chr3L | 17949109 | 17949489 | CR45393          | 1570  | 23.548  | 5.32  |
| chr3L | 17956288 | 17957404 | Eip75B           | 5146  | 132.1   | 10.68 |
| chr3L | 17957740 | 17959085 | Eip75B           | 3480  | 144.932 | 12.23 |
| chr3L | 17961407 | 17962719 | Eip75B           | 60    | 316.742 | 18.89 |
| chr3L | 17964660 | 17965650 | Eip75B           | 3154  | 188.937 | 13.21 |
| chr3L | 17968534 | 17969110 | Eip75B           | 2576  | 85.9738 | 9.40  |
| chr3L | 17970934 | 17971621 | Eip75B           | 131   | 266.869 | 19.74 |
| chr3L | 17972367 | 17973467 | Eip75B           | 1176  | 270.268 | 19.08 |
| chr3L | 17975649 | 17976019 | Eip75B           | 4341  | 20.5555 | 4.78  |
| chr3L | 17999375 | 18000071 | Eip75B           | 239   | 82.8388 | 11.52 |
| chr3L | 18005292 | 18005708 | snoRNA:Me28S-A30 | 2388  | 72.6663 | 10.14 |
| chr3L | 18020129 | 18020464 | Eip75B           | 5711  | 26.5164 | 5.32  |
| chr3L | 18020894 | 18021495 | Eip75B           | 4955  | 147.725 | 14.50 |
| chr3L | 18021974 | 18023094 | Eip75B           | 3177  | 176.141 | 16.08 |
| chr3L | 18029359 | 18029912 | Eip75B           | 3611  | 281.968 | 20.28 |
| chr3L | 18032806 | 18034742 | CR45922          | 5179  | 316.742 | 17.31 |
| chr3L | 18036135 | 18036712 | CR45922          | 1881  | 45.9767 | 7.32  |
| chr3L | 18044236 | 18044914 | CG42393          | 1882  | 62.1708 | 7.26  |
| chr3L | 18045553 | 18045940 | CG42393          | 3064  | 13.6168 | 3.23  |
| chr3L | 18056949 | 18057416 | Eip75B           | 2419  | 98.1772 | 10.01 |
| chr3L | 18061492 | 18062305 | Eip75B           | 455   | 316.742 | 31.18 |
| chr3L | 18062761 | 18063715 | Eip75B           | 1297  | 316.742 | 35.38 |
| chr3L | 18064643 | 18065225 | Eip75B           | 252   | 316.742 | 25.35 |
| chr3L | 18066390 | 18066836 | Eip75B           | 1892  | 47.5754 | 7.45  |
| chr3L | 18069819 | 18070452 | CG44006          | 1     | 316.742 | 39.17 |
| chr3L | 18073586 | 18074076 | CG44004          | 26    | 254.52  | 21.24 |
| chr3L | 18074837 | 18075331 | CG44004          | 1195  | 187.094 | 17.00 |
| chr3L | 18077660 | 18078635 | CR45392          | 421   | 86.3472 | 11.02 |
| chr3L | 18082029 | 18082411 | CR43253          | 3184  | 8.93907 | 3.00  |
| chr3L | 18087079 | 18087613 | CG34253          | 61    | 77.2515 | 8.63  |
| chr3L | 18105463 | 18106372 | CG13698          | 423   | 277.529 | 18.30 |
| chr3L | 18114234 | 18114811 | CG32195          | 193   | 95.4907 | 7.93  |
| chr3L | 18138971 | 18139673 | geko             | 94    | 316.742 | 31.01 |
| chr3L | 18141641 | 18142112 | geko             | 2371  | 15.5456 | 3.50  |
| chr3L | 18167075 | 18167421 | CG13699          | 4706  | 43.9209 | 7.75  |
| chr3L | 18172395 | 18172680 | CG13699          | 10009 | 18.3971 | 4.42  |
| chr3L | 18179669 | 18180007 | hid              | 5824  | 16.7679 | 4.05  |
| chr3L | 18185392 | 18187199 | hid              | 100   | 316.742 | 29.19 |
| chr3L | 18213858 | 18214260 | CG7320           | 12574 | 55.5708 | 8.47  |
| chr3L | 18234033 | 18235029 | CR45937          | 414   | 316.742 | 26.52 |
| chr3L | 18304279 | 18304972 | grim             | 177   | 76.6982 | 9.62  |
| chr3L | 18398324 | 18398688 | rpr              | 110   | 24.9044 | 5.56  |
| chr3L | 18439764 | 18440317 | skl              | 90    | 137.289 | 14.53 |
| chr3L | 18539753 | 18540141 | CG32198          | 12962 | 64.6289 | 9.83  |
| chr3L | 18559883 | 18560285 | AstC-R1          | 210   | 39.3302 | 7.25  |
| chr3L | 18618163 | 18618487 | CG13380          | 387   | 35.1247 | 6.04  |
| chr3L | 18618163 | 18618487 | CG4174           | 387   | 35.1247 | 6.04  |
| chr3L | 18618163 | 18618487 | CG13380          | 387   | 35.1247 | 6.04  |
| chr3L | 18618163 | 18618487 | CG4174           | 387   | 35.1247 | 6.04  |
| chr3L | 18621040 | 18622170 | not              | 788   | 316.742 | 22.04 |
| chr3L | 18625872 | 18626148 | MYPT-75D         | 47    | 37.1113 | 5.35  |
| chr3L | 18627520 | 18628020 | MYPT-75D         | 1938  | 8.27928 | 2.93  |
| chr3L | 18628488 | 18628870 | MYPT-75D         | 2747  | 24.5199 | 5.05  |
| chr3L | 18633070 | 18633566 | MYPT-75D         | 7380  | 66.084  | 9.63  |
| chr3L | 18640161 | 18641638 | MYPT-75D         | 553   | 316.742 | 40.00 |
| chr3L | 18672334 | 18673335 | Capr             | 662   | 39.9071 | 6.08  |
| chr3L | 18748637 | 18748905 | Atg3             | 74    | 15.9198 | 3.41  |
| chr3L | 18753738 | 18754211 | CR45938          | 118   | 230.328 | 19.36 |
| chr3L | 18756792 | 18757685 | CR45938          | 3196  | 316.742 | 24.62 |
| chr3L | 18758847 | 18759781 | CR45938          | 5227  | 277.626 | 15.43 |
| chr3L | 18760612 | 18761153 | ftz-f1           | 4147  | 160.34  | 13.99 |
| chr3L | 18765432 | 18766252 | ftz-f1           | 195   | 316.742 | 24.73 |
| chr3L | 18771124 | 18772245 | ftz-f1           | 5891  | 316.742 | 25.86 |

|       |          |          |                    |       |         |       |
|-------|----------|----------|--------------------|-------|---------|-------|
| chr3L | 18781582 | 18782092 | ftz-f1             | 15943 | 19.6611 | 3.88  |
| chr3L | 18783618 | 18784262 | ftz-f1             | 17447 | 20.3193 | 4.97  |
| chr3L | 18787861 | 18788155 | ftz-f1             | 13285 | 26.0364 | 5.07  |
| chr3L | 18790832 | 18791792 | ftz-f1             | 9797  | 107.067 | 8.84  |
| chr3L | 18792671 | 18793392 | ftz-f1             | 8331  | 316.742 | 28.10 |
| chr3L | 18795195 | 18796103 | ftz-f1             | 5453  | 72.733  | 9.54  |
| chr3L | 18799952 | 18801709 | ftz-f1             | 864   | 316.742 | 18.74 |
| chr3L | 18799952 | 18801709 | CR45939            | 867   | 316.742 | 18.74 |
| chr3L | 18812029 | 18812348 | CG14073            | 8414  | 14.4561 | 3.57  |
| chr3L | 18813928 | 18814684 | CG14073            | 6248  | 120.782 | 10.51 |
| chr3L | 18817310 | 18817775 | CG14073            | 3100  | 24.6114 | 4.43  |
| chr3L | 18819710 | 18820800 | CG14073            | 286   | 43.7038 | 5.65  |
| chr3L | 18822490 | 18823163 | Cat                | 248   | 191.664 | 13.02 |
| chr3L | 18834678 | 18835022 | Indy               | 5670  | 50.2466 | 7.90  |
| chr3L | 18840247 | 18840884 | Indy               | 96    | 244.426 | 17.81 |
| chr3L | 18845442 | 18846573 | Indy               | 51    | 289.991 | 19.05 |
| chr3L | 18848353 | 18848710 | Indy               | 2274  | 82.2316 | 10.96 |
| chr3L | 18867470 | 18868033 | Dysb               | 9     | 315.446 | 22.17 |
| chr3L | 18890102 | 18891443 | CG3961             | 549   | 316.742 | 27.32 |
| chr3L | 18895116 | 18895530 | snoRNA:Psi28S-2566 | 1157  | 43.0266 | 6.40  |
| chr3L | 18896330 | 18896813 | snoRNA:Psi28S-2566 | 101   | 76.8462 | 9.12  |
| chr3L | 18898025 | 18898428 | CG3902             | 70    | 37.4321 | 5.12  |
| chr3L | 18945916 | 18946247 | CG32204            | 8     | 26.6186 | 4.91  |
| chr3L | 18946954 | 18947275 | CG32204            | 1084  | 67.689  | 9.72  |
| chr3L | 18949112 | 18949546 | CG6836             | 1320  | 18.2556 | 3.86  |
| chr3L | 18994531 | 18994967 | CG18135            | 849   | 11.9688 | 3.15  |
| chr3L | 18995596 | 18996068 | CG18135            | 25    | 40.3367 | 5.87  |
| chr3L | 18996370 | 18997112 | CG18135            | 1012  | 152.39  | 10.14 |
| chr3L | 19015831 | 19017150 | CG18136            | 13125 | 166.999 | 13.67 |
| chr3L | 19044849 | 19045748 | nkd                | 30    | 316.742 | 20.53 |
| chr3L | 19062619 | 19063513 | CG3797             | 375   | 22.4999 | 3.56  |
| chr3L | 19062619 | 19063513 | CG6812             | 27    | 22.4999 | 3.56  |
| chr3L | 19072203 | 19072749 | Mkp3               | 6     | 58.7158 | 8.45  |
| chr3L | 19081358 | 19081748 | Mkp3               | 4875  | 76.9565 | 8.95  |
| chr3L | 19085989 | 19087713 | Mkp3               | 52    | 316.742 | 24.47 |
| chr3L | 19091506 | 19092195 | MESR6              | 760   | 61.4394 | 6.35  |
| chr3L | 19170298 | 19172457 | fz2                | 1197  | 316.742 | 46.85 |
| chr3L | 19177888 | 19178202 | CR45941            | 6728  | 9.87221 | 3.24  |
| chr3L | 19218605 | 19219610 | CR43893            | 10343 | 17.289  | 4.24  |
| chr3L | 19230673 | 19231067 | CR43893            | 1795  | 40.905  | 6.96  |
| chr3L | 19234450 | 19234750 | fz2                | 764   | 21.3369 | 4.34  |
| chr3L | 19235129 | 19235648 | fz2                | 33    | 71.4745 | 7.15  |
| chr3L | 19237934 | 19238205 | CG33647            | 1693  | 13.1054 | 3.64  |
| chr3L | 19260243 | 19260716 | nes                | 226   | 12.0842 | 3.03  |
| chr3L | 19292072 | 19293649 | Gbs-76A            | 111   | 316.742 | 23.59 |
| chr3L | 19294320 | 19295300 | fal                | 223   | 128.959 | 10.51 |
| chr3L | 19294320 | 19295300 | CR46048            | 209   | 128.959 | 10.51 |
| chr3L | 19412772 | 19413305 | CG32206            | 117   | 112.992 | 12.17 |
| chr3L | 19432132 | 19432654 | CR45732            | 8812  | 121.374 | 13.06 |
| chr3L | 19482019 | 19482315 | brv1               | 4323  | 49.9213 | 6.45  |
| chr3L | 19500145 | 19500977 | CG9451             | 514   | 17.6934 | 4.13  |
| chr3L | 19528260 | 19529168 | Cpr76Bd            | 3978  | 41.7058 | 6.66  |
| chr3L | 19562091 | 19563790 | CR45916            | 301   | 315.49  | 19.99 |
| chr3L | 19566066 | 19566700 | mir-9a             | 1343  | 111.575 | 11.79 |
| chr3L | 19580745 | 19581094 | Shal               | 3668  | 35.153  | 5.66  |
| chr3L | 19583478 | 19584738 | Shal               | 55    | 26.6186 | 4.91  |
| chr3L | 19605944 | 19606616 | lush               | 101   | 54.4436 | 6.95  |
| chr3L | 19605944 | 19606616 | CG9372             | 16    | 54.4436 | 6.95  |
| chr3L | 19618190 | 19618934 | l(3)76BDm          | 235   | 16.7281 | 3.68  |
| chr3L | 19618190 | 19618934 | asf1               | 607   | 16.7281 | 3.68  |
| chr3L | 19632693 | 19633402 | wnd                | 24    | 316.742 | 27.39 |
| chr3L | 19635068 | 19636127 | wnd                | 55    | 316.742 | 33.18 |
| chr3L | 19649673 | 19650031 | Oat                | 34    | 24.9044 | 5.56  |
| chr3L | 19663611 | 19664072 | tey                | 146   | 36.1065 | 5.84  |
| chr3L | 19682888 | 19683372 | CR44678            | 2963  | 30.9021 | 4.99  |
| chr3L | 19694927 | 19695452 | verm               | 33    | 22.9723 | 4.66  |
| chr3L | 19707436 | 19708187 | serp               | 62    | 23.7842 | 4.45  |
| chr3L | 19787670 | 19788042 | Gyc76C             | 3192  | 49.3026 | 7.60  |
| chr3L | 19787670 | 19788042 | CG42637            | 3192  | 49.3026 | 7.60  |
| chr3L | 19789956 | 19792297 | Gyc76C             | 549   | 316.742 | 33.04 |
| chr3L | 19789956 | 19792297 | CG42637            | 549   | 316.742 | 33.04 |
| chr3L | 19792754 | 19794505 | Gyc76C             | 120   | 142.87  | 12.03 |
| chr3L | 19792754 | 19794505 | CG42637            | 120   | 142.87  | 12.03 |
| chr3L | 19792754 | 19794505 | SREBP              | 245   | 142.87  | 12.03 |
| chr3L | 19813150 | 19813580 | Cyp305a1           | 4     | 51.3979 | 6.61  |

|       |          |          |         |       |         |       |
|-------|----------|----------|---------|-------|---------|-------|
| chr3L | 19815517 | 19815859 | cyc     | 275   | 20.8343 | 3.56  |
| chr3L | 19818700 | 19819231 | Deaf1   | 167   | 46.4249 | 6.53  |
| chr3L | 19833168 | 19833623 | trc     | 902   | 87.1435 | 9.13  |
| chr3L | 19847908 | 19848319 | Papss   | 28    | 35.7647 | 6.85  |
| chr3L | 19861307 | 19861626 | CR45433 | 28    | 13.0311 | 3.32  |
| chr3L | 19870519 | 19871203 | Rab8    | 270   | 55.1986 | 6.78  |
| chr3L | 19870519 | 19871203 | Usp32   | 330   | 55.1986 | 6.78  |
| chr3L | 19871648 | 19871999 | Usp32   | 661   | 12.1207 | 3.00  |
| chr3L | 19894918 | 19897921 | CR32218 | 118   | 316.742 | 29.57 |
| chr3L | 19899290 | 19899716 | CR32218 | 3202  | 12.3895 | 3.01  |
| chr3L | 19900223 | 19900890 | CR32218 | 4312  | 63.743  | 7.14  |
| chr3L | 19903407 | 19903690 | CR43889 | 5789  | 26.7863 | 4.64  |
| chr3L | 19904658 | 19905064 | CR43889 | 4448  | 32.4941 | 4.91  |
| chr3L | 19905626 | 19906348 | CR43889 | 3566  | 32.737  | 5.30  |
| chr3L | 19906728 | 19907696 | CR43889 | 2212  | 211.032 | 16.29 |
| chr3L | 19908112 | 19910491 | CR43889 | 398   | 316.742 | 20.67 |
| chr3L | 19908112 | 19910491 | Su(Tpl) | 444   | 316.742 | 20.67 |
| chr3L | 19908112 | 19910491 | Mi-2    | 1249  | 316.742 | 20.67 |
| chr3L | 19908112 | 19910491 | Prp3    | 1333  | 316.742 | 20.67 |
| chr3L | 19929026 | 19929490 | RhoGDI  | 559   | 37.0387 | 4.97  |
| chr3L | 19929830 | 19930390 | RhoGDI  | 1395  | 169.412 | 15.34 |
| chr3L | 19932992 | 19933361 | CR45678 | 570   | 34.4769 | 4.76  |
| chr3L | 19938911 | 19939465 | Ac76E   | 114   | 316.742 | 22.48 |
| chr3L | 20002710 | 20003100 | CG7668  | 190   | 41.9034 | 6.20  |
| chr3L | 20006311 | 20006648 | kug     | 154   | 25.3684 | 4.87  |
| chr3L | 20088873 | 20089197 | sNPF-R  | 65    | 9.74428 | 3.38  |
| chr3L | 20103487 | 20105540 | CG14186 | 522   | 60.8395 | 8.24  |
| chr3L | 20103487 | 20105540 | CR44679 | 153   | 60.8395 | 8.24  |
| chr3L | 20185083 | 20185408 | CG42674 | 148   | 17.8883 | 4.06  |
| chr3L | 20185924 | 20187040 | CG42674 | 1344  | 248.992 | 16.12 |
| chr3L | 20197664 | 20198636 | CG42674 | 51    | 266.533 | 15.93 |
| chr3L | 20230408 | 20230687 | CG13813 | 1192  | 10.0788 | 2.82  |
| chr3L | 20241343 | 20241601 | CG17233 | 13    | 9.56822 | 2.82  |
| chr3L | 20241343 | 20241601 | CG6951  | 57    | 9.56822 | 2.82  |
| chr3L | 20241343 | 20241601 | Clc     | 57    | 9.56822 | 2.82  |
| chr3L | 20247572 | 20248354 | rdgC    | 171   | 100.956 | 11.82 |
| chr3L | 20295028 | 20295499 | gogo    | 164   | 68.2663 | 8.32  |
| chr3L | 20302123 | 20302689 | Pex23   | 127   | 10.0522 | 3.04  |
| chr3L | 20302123 | 20302689 | CG6597  | 162   | 10.0522 | 3.04  |
| chr3L | 20306087 | 20306530 | CG32225 | 71    | 56.8284 | 8.18  |
| chr3L | 20316802 | 20317737 | Spn77Ba | 70    | 316.742 | 21.27 |
| chr3L | 20316802 | 20317737 | CR43875 | 164   | 316.742 | 21.27 |
| chr3L | 20341237 | 20341508 | Spn77Bc | 1301  | 17.2351 | 4.22  |
| chr3L | 20348263 | 20349837 | eRF1    | 267   | 316.742 | 19.61 |
| chr3L | 20353418 | 20354362 | CG5618  | 122   | 87.6548 | 8.63  |
| chr3L | 20366852 | 20367578 | in      | 84    | 164.23  | 12.07 |
| chr3L | 20376130 | 20376577 | RhoBTB  | 16    | 10.029  | 2.85  |
| chr3L | 20385732 | 20386367 | fbl     | 260   | 64.0799 | 7.26  |
| chr3L | 20397628 | 20399823 | CR45677 | 2934  | 191.225 | 13.31 |
| chr3L | 20400089 | 20400579 | trbl    | 1356  | 32.6458 | 5.71  |
| chr3L | 20401083 | 20402072 | trbl    | 116   | 316.742 | 42.00 |
| chr3L | 20439673 | 20440004 | CG11796 | 27    | 23.7399 | 4.88  |
| chr3L | 20439673 | 20440004 | CR43943 | 108   | 23.7399 | 4.88  |
| chr3L | 20473036 | 20473497 | CG32428 | 21    | 20.1186 | 4.27  |
| chr3L | 20493750 | 20494027 | ZnT77C  | 397   | 27.638  | 5.48  |
| chr3L | 20497316 | 20497771 | CG32425 | 203   | 23.5033 | 4.51  |
| chr3L | 20507983 | 20508668 | CG32425 | 1458  | 117.685 | 10.43 |
| chr3L | 20509211 | 20510019 | CG32425 | 90    | 103.374 | 12.72 |
| chr3L | 20517321 | 20517829 | CG5059  | 274   | 143.649 | 12.76 |
| chr3L | 20518449 | 20519461 | CG5059  | 761   | 23.7434 | 4.28  |
| chr3L | 20525911 | 20526212 | CG4825  | 33    | 6.98208 | 2.53  |
| chr3L | 20540177 | 20540748 | Rcd2    | 42    | 316.742 | 21.21 |
| chr3L | 20620403 | 20622427 | knrl    | 1093  | 316.742 | 26.37 |
| chr3L | 20674922 | 20675847 | kni     | 19378 | 27.1135 | 4.87  |
| chr3L | 20695154 | 20695929 | kni     | 152   | 267.406 | 21.41 |
| chr3L | 20719038 | 20719446 | cmpy    | 11    | 36.6468 | 6.95  |
| chr3L | 20729940 | 20730897 | CG13252 | 148   | 316.742 | 33.92 |
| chr3L | 20733813 | 20734231 | CG13252 | 3430  | 47.1603 | 7.27  |
| chr3L | 20769304 | 20769605 | CG4074  | 29    | 11.5443 | 3.00  |
| chr3L | 20769304 | 20769605 | CG4186  | 74    | 11.5443 | 3.00  |
| chr3L | 20771351 | 20771876 | CG4042  | 96    | 9.50205 | 2.81  |
| chr3L | 20771351 | 20771876 | Pitslre | 76    | 9.50205 | 2.81  |
| chr3L | 20784371 | 20786296 | CG11399 | 752   | 316.742 | 35.67 |
| chr3L | 20808985 | 20809340 | CG3634  | 7     | 9.55401 | 2.78  |
| chr3L | 20837826 | 20838789 | CG13255 | 234   | 77.6819 | 7.84  |

|       |          |          |                 |      |         |       |
|-------|----------|----------|-----------------|------|---------|-------|
| chr3L | 20837826 | 20838789 | CR45943         | 567  | 77.6819 | 7.84  |
| chr3L | 20884749 | 20885529 | CG32432         | 7    | 21.0402 | 4.52  |
| chr3L | 20933158 | 20933463 | CG10589         | 5472 | 9.74428 | 3.38  |
| chr3L | 20948981 | 20950786 | fng             | 150  | 316.742 | 43.36 |
| chr3L | 20948981 | 20950786 | CR45243         | 1121 | 316.742 | 43.36 |
| chr3L | 21007576 | 21010180 | scaRNA:PsiU6-40 | 2516 | 316.742 | 35.13 |
| chr3L | 21010877 | 21012239 | scaRNA:PsiU6-40 | 4646 | 316.742 | 24.27 |
| chr3L | 21014415 | 21014966 | scaRNA:PsiU6-40 | 8281 | 162.841 | 17.23 |
| chr3L | 21023394 | 21023881 | skd             | 2657 | 310.689 | 27.09 |
| chr3L | 21024706 | 21027511 | skd             | 211  | 316.742 | 38.60 |
| chr3L | 21027776 | 21028310 | CG10585         | 111  | 61.8142 | 7.07  |
| chr3L | 21034418 | 21034781 | siz             | 73   | 35.4504 | 5.04  |
| chr3L | 21042192 | 21043034 | siz             | 5814 | 55.0806 | 7.21  |
| chr3L | 21043526 | 21043909 | siz             | 4413 | 12.0088 | 3.55  |
| chr3L | 21047203 | 21048190 | siz             | 292  | 88.4047 | 9.80  |
| chr3L | 21049367 | 21050038 | siz             | 1441 | 118.202 | 10.86 |
| chr3L | 21055897 | 21056200 | siz             | 2735 | 9.26653 | 2.67  |
| chr3L | 21056610 | 21059563 | siz             | 15   | 316.742 | 38.25 |
| chr3L | 21060028 | 21060637 | siz             | 1522 | 182.83  | 12.73 |
| chr3L | 21063619 | 21063951 | CG43072         | 2074 | 31.8918 | 5.04  |
| chr3L | 21150649 | 21151075 | Ac78C           | 233  | 38.8308 | 7.13  |
| chr3L | 21172702 | 21173405 | chb             | 30   | 92.0847 | 9.53  |
| chr3L | 21172702 | 21173405 | AsnS            | 235  | 92.0847 | 9.53  |
| chr3L | 21175733 | 21176810 | chb             | 215  | 27.3656 | 4.21  |
| chr3L | 21185704 | 21186916 | CG42337         | 6688 | 72.6134 | 9.87  |
| chr3L | 21191772 | 21192465 | CG42337         | 1314 | 52.9192 | 7.43  |
| chr3L | 21193136 | 21193992 | CG42337         | 291  | 99.2228 | 10.17 |
| chr3L | 21202405 | 21203366 | CG33054         | 43   | 316.742 | 19.96 |
| chr3L | 21202405 | 21203366 | CG33056         | 43   | 316.742 | 19.96 |
| chr3L | 21202405 | 21203366 | CG10512         | 6    | 316.742 | 19.96 |
| chr3L | 21202405 | 21203366 | CG33056         | 307  | 316.742 | 19.96 |
| chr3L | 21205265 | 21205733 | CG10512         | 23   | 16.3449 | 3.91  |
| chr3L | 21210028 | 21210963 | CG10510         | 145  | 36.6054 | 5.39  |
| chr3L | 21210028 | 21210963 | CG10508         | 15   | 36.6054 | 5.39  |
| chr3L | 21219213 | 21220348 | CG43219         | 975  | 91.4418 | 8.92  |
| chr3L | 21239777 | 21240612 | Eip78C          | 252  | 316.742 | 29.17 |
| chr3L | 21276637 | 21277383 | AcCoAS          | 786  | 252.993 | 19.91 |
| chr3L | 21279720 | 21280598 | AcCoAS          | 1    | 160.692 | 10.62 |
| chr3L | 21285684 | 21286346 | CG12974         | 133  | 44.4803 | 5.70  |
| chr3L | 21285684 | 21286346 | pzg             | 3    | 44.4803 | 5.70  |
| chr3L | 21304737 | 21305018 | CG7632          | 134  | 10.7193 | 2.91  |
| chr3L | 21317773 | 21318100 | Pc              | 36   | 6.82529 | 2.28  |
| chr3L | 21318530 | 21318889 | CR45674         | 36   | 35.6154 | 5.23  |
| chr3L | 21318530 | 21318889 | Rab26           | 87   | 35.6154 | 5.23  |
| chr3L | 21319267 | 21319944 | Rab26           | 523  | 54.2892 | 7.33  |
| chr3L | 21322175 | 21322465 | Rab26           | 69   | 14.3285 | 3.93  |
| chr3L | 21346689 | 21347390 | ebd2            | 124  | 38.1633 | 5.64  |
| chr3L | 21381635 | 21382774 | rgn             | 40   | 316.742 | 23.67 |
| chr3L | 21433319 | 21434374 | Aef1            | 306  | 35.8731 | 5.22  |
| chr3L | 21476333 | 21477268 | croc            | 464  | 316.742 | 30.49 |
| chr3L | 21479450 | 21480147 | croc            | 3321 | 274.867 | 20.85 |
| chr3L | 21483939 | 21484504 | Neu2            | 6440 | 75.9772 | 8.88  |
| chr3L | 21485038 | 21485831 | Neu2            | 5087 | 316.742 | 22.22 |
| chr3L | 21497131 | 21497501 | Hr78            | 148  | 13.8792 | 3.28  |
| chr3L | 21498806 | 21499586 | CR43933         | 1473 | 37.0454 | 6.63  |
| chr3L | 21507468 | 21508199 | Glg1            | 462  | 23.3677 | 4.17  |
| chr3L | 21507468 | 21508199 | M6              | 149  | 23.3677 | 4.17  |
| chr3L | 21509608 | 21509968 | M6              | 99   | 45.2998 | 7.39  |
| chr3L | 21516218 | 21516541 | Cdk12           | 10   | 13.9818 | 3.12  |
| chr3L | 21536966 | 21537253 | Rpn10           | 18   | 22.835  | 4.39  |
| chr3L | 21584723 | 21585125 | TfAP-2          | 1935 | 86.456  | 11.17 |
| chr3L | 21598266 | 21598721 | TfAP-2          | 351  | 28.119  | 5.96  |
| chr3L | 21640744 | 21641129 | Atox1           | 111  | 16.3449 | 3.91  |
| chr3L | 21644586 | 21645155 | CG43980         | 139  | 62.4965 | 8.76  |
| chr3L | 21738238 | 21738610 | CG14567         | 1    | 59.2347 | 8.66  |
| chr3L | 21769406 | 21770969 | CG7370          | 764  | 262.794 | 15.43 |
| chr3L | 21769406 | 21770969 | Syn1            | 44   | 262.794 | 15.43 |
| chr3L | 21807928 | 21808503 | eg              | 453  | 129.968 | 10.48 |
| chr3L | 21818716 | 21819215 | CycH            | 3055 | 42.8436 | 7.07  |
| chr3L | 21839998 | 21841457 | P5CDh1          | 404  | 197.046 | 13.58 |
| chr3L | 21843345 | 21843726 | CG14563         | 1133 | 41.5677 | 6.46  |
| chr3L | 21844424 | 21844956 | mub             | 14   | 16.9779 | 4.04  |
| chr3L | 21879211 | 21880910 | mub             | 1068 | 316.742 | 26.03 |
| chr3L | 21883057 | 21883519 | mub             | 3615 | 15.0422 | 3.64  |
| chr3L | 21884045 | 21884395 | CR43878         | 2818 | 22.2894 | 4.46  |

|       |          |          |           |       |         |       |
|-------|----------|----------|-----------|-------|---------|-------|
| chr3L | 21886186 | 21887427 | CR43878   | 33    | 199.307 | 14.14 |
| chr3L | 21889602 | 21890234 | CR43878   | 2929  | 29.3938 | 4.54  |
| chr3L | 21890507 | 21891384 | CR43878   | 3803  | 148.882 | 12.80 |
| chr3L | 21892335 | 21893021 | CR43878   | 5540  | 82.2486 | 8.81  |
| chr3L | 21954777 | 21955423 | CG7458    | 47    | 316.742 | 23.38 |
| chr3L | 22034835 | 22035100 | Oct-TyrR  | 13    | 16.9306 | 4.44  |
| chr3L | 22070675 | 22070980 | CG7139    | 1052  | 20.4581 | 4.22  |
| chr3L | 22075955 | 22076292 | RpLP0     | 41    | 14.9633 | 3.32  |
| chr3L | 22132740 | 22133147 | olf413    | 3168  | 75.4293 | 10.20 |
| chr3L | 22134052 | 22135257 | olf413    | 1362  | 153.699 | 12.59 |
| chr3L | 22135752 | 22136379 | olf413    | 47    | 316.742 | 30.22 |
| chr3L | 22267189 | 22267991 | Csp       | 112   | 24.8876 | 4.42  |
| chr3L | 22273788 | 22274122 | SrpK79D   | 42    | 18.8111 | 4.13  |
| chr3L | 22276365 | 22276707 | CR45960   | 866   | 13.0895 | 3.76  |
| chr3L | 22346706 | 22347083 | CR45963   | 1534  | 24.6583 | 5.32  |
| chr3L | 22407525 | 22408570 | CR45962   | 408   | 316.742 | 37.18 |
| chr3L | 22407525 | 22408570 | Ten-m     | 92    | 316.742 | 37.18 |
| chr3L | 22460819 | 22461487 | laza      | 49    | 95.7768 | 11.34 |
| chr3L | 22465768 | 22466907 | CG11438   | 540   | 45.9767 | 7.32  |
| chr3L | 22470424 | 22471090 | CG11426   | 61    | 27.0891 | 4.93  |
| chr3L | 22474233 | 22474507 | CR45382   | 64    | 15.2586 | 3.45  |
| chr3L | 22571696 | 22572857 | Trxr-2    | 21713 | 45.5576 | 6.62  |
| chr3L | 22642520 | 22642827 | CR45381   | 1234  | 19.9701 | 4.36  |
| chr3L | 22720513 | 22721171 | mael      | 202   | 25.7575 | 5.24  |
| chr3L | 22727843 | 22728440 | CG11367   | 5     | 316.742 | 18.43 |
| chr3L | 22738203 | 22738754 | CG11241   | 57    | 214.394 | 17.56 |
| chr3L | 22738203 | 22738754 | CR45163   | 230   | 214.394 | 17.56 |
| chr3L | 22741165 | 22742549 | l(3)04053 | 435   | 23.427  | 4.00  |
| chr3L | 22741165 | 22742549 | CG7369    | 31    | 23.427  | 4.00  |
| chr3L | 22773288 | 22774212 | SPoCk     | 21    | 173.495 | 12.70 |
| chr3L | 22822338 | 22825379 | jim       | 107   | 316.742 | 40.16 |
| chr3L | 22830576 | 22830844 | jim       | 2684  | 12.2753 | 3.56  |
| chr3L | 22835000 | 22836151 | jim       | 351   | 316.742 | 40.48 |
| chr3L | 22837523 | 22838913 | CG45428   | 794   | 316.742 | 28.86 |
| chr3L | 22839224 | 22840313 | CR45659   | 468   | 316.742 | 24.82 |
| chr3L | 22840772 | 22841155 | CR45659   | 84    | 17.6934 | 3.86  |
| chr3L | 22851033 | 22852186 | CR43426   | 747   | 316.742 | 32.52 |
| chr3L | 22863698 | 22863988 | CG33169   | 51    | 14.9859 | 3.32  |
| chr3L | 22864655 | 22865103 | CG33170   | 10    | 64.5611 | 6.41  |
| chr3L | 22870979 | 22872373 | Arf79F    | 341   | 60.0756 | 7.17  |
| chr3L | 22870979 | 22872373 | CR45969   | 253   | 60.0756 | 7.17  |
| chr3L | 22870979 | 22872373 | Arf79F    | 13    | 60.0756 | 7.17  |
| chr3L | 22870979 | 22872373 | CG11109   | 134   | 60.0756 | 7.17  |
| chr3L | 22870979 | 22872373 | Arf79F    | 166   | 60.0756 | 7.17  |
| chr3L | 22870979 | 22872373 | CG11109   | 192   | 60.0756 | 7.17  |
| chr3L | 22878641 | 22879127 | Chro      | 34    | 35.001  | 5.37  |
| chr3L | 22878641 | 22879127 | Ssl1      | 286   | 35.001  | 5.37  |
| chr3L | 22880807 | 22881291 | slif      | 57    | 32.272  | 4.55  |
| chr3L | 22894706 | 22895208 | CR44688   | 1136  | 20.5586 | 3.94  |
| chr3L | 22910173 | 22910654 | CG12768   | 68    | 101.836 | 11.25 |
| chr3L | 22945248 | 22945723 | Mes2      | 174   | 78.8346 | 9.27  |
| chr3L | 22948317 | 22948994 | Mes2      | 2558  | 39.3585 | 5.98  |
| chr3L | 22960270 | 22961108 | CR45758   | 373   | 90.0378 | 11.79 |
| chr3L | 22998180 | 22998562 | nrm       | 9     | 23.4066 | 4.74  |
| chr3L | 24723745 | 24724078 | scro      | 222   | 27.5095 | 4.76  |
| chr3L | 26012525 | 26012890 | CG40178   | 1005  | 64.8389 | 8.58  |
| chr3R | 4077617  | 4078125  | CG42402   | 87    | 114.661 | 10.53 |
| chr3R | 4083619  | 4084149  | CG42402   | 219   | 54.498  | 8.84  |
| chr3R | 4130120  | 4130797  | Gfat1     | 142   | 87.318  | 11.35 |
| chr3R | 4174259  | 4175927  | CG12581   | 81    | 316.742 | 34.88 |
| chr3R | 4177276  | 4177753  | CG12581   | 2915  | 12.2088 | 3.24  |
| chr3R | 4186709  | 4187645  | Dsk       | 3382  | 39.904  | 5.27  |
| chr3R | 4196975  | 4197577  | beta-Man  | 42    | 199.079 | 18.40 |
| chr3R | 4235003  | 4235333  | Gel       | 45    | 32.4034 | 4.61  |
| chr3R | 4236079  | 4237199  | Gel       | 77    | 243.549 | 15.36 |
| chr3R | 4280047  | 4280423  | CR45597   | 199   | 13.4179 | 3.66  |
| chr3R | 4280047  | 4280423  | cpx       | 36    | 13.4179 | 3.66  |
| chr3R | 4281052  | 4282015  | cpx       | 333   | 36.371  | 5.54  |
| chr3R | 4284486  | 4284983  | cpx       | 2181  | 23.9095 | 5.23  |
| chr3R | 4291248  | 4292036  | cpx       | 200   | 53.0987 | 6.74  |
| chr3R | 4307484  | 4308246  | MP1       | 91    | 316.742 | 28.73 |
| chr3R | 4311509  | 4311764  | CG9791    | 30    | 8.38584 | 2.62  |
| chr3R | 4319958  | 4320222  | CG9795    | 364   | 7.54905 | 2.59  |
| chr3R | 4337617  | 4338050  | Skp2      | 122   | 32.9664 | 4.73  |
| chr3R | 4337617  | 4338050  | CG1103    | 42    | 32.9664 | 4.73  |

|       |         |         |           |       |         |       |
|-------|---------|---------|-----------|-------|---------|-------|
| chr3R | 4359623 | 4361281 | CG1090    | 1136  | 271.197 | 17.69 |
| chr3R | 4378606 | 4379467 | CG11739   | 52    | 316.742 | 24.77 |
| chr3R | 4387586 | 4387894 | tub       | 4     | 16.6471 | 3.42  |
| chr3R | 4402962 | 4404004 | lost      | 632   | 62.5136 | 7.17  |
| chr3R | 4419405 | 4419856 | CG32944   | 74    | 66.3745 | 8.18  |
| chr3R | 4433171 | 4434058 | elF3-S10  | 232   | 208.397 | 14.44 |
| chr3R | 4433171 | 4434058 | CG1074    | 301   | 208.397 | 14.44 |
| chr3R | 4449275 | 4449659 | CG31522   | 1395  | 27.7117 | 5.42  |
| chr3R | 4452260 | 4454093 | CR43629   | 454   | 316.742 | 26.52 |
| chr3R | 4452260 | 4454093 | CG31522   | 75    | 316.742 | 26.52 |
| chr3R | 4452260 | 4454093 | CR43629   | 159   | 316.742 | 26.52 |
| chr3R | 4468867 | 4469204 | CG31523   | 417   | 14.6993 | 3.39  |
| chr3R | 4470231 | 4470592 | CG31523   | 882   | 17.6452 | 3.80  |
| chr3R | 4471064 | 4471654 | CG31523   | 16    | 52.2481 | 6.28  |
| chr3R | 4478136 | 4479300 | CG31523   | 453   | 297.895 | 21.46 |
| chr3R | 4599662 | 4600018 | CR44317   | 65    | 40.6205 | 5.98  |
| chr3R | 4612611 | 4612972 | 5-HT2A    | 46    | 40.7545 | 5.80  |
| chr3R | 4649307 | 4650273 | Karybeta3 | 683   | 44.6372 | 5.96  |
| chr3R | 4654736 | 4655269 | spartin   | 115   | 39.3957 | 4.75  |
| chr3R | 4659370 | 4660310 | CG43427   | 48    | 87.2818 | 7.30  |
| chr3R | 4731727 | 4732108 | Nep2      | 1     | 32.1019 | 5.13  |
| chr3R | 4738732 | 4740992 | tacc      | 75    | 316.742 | 36.36 |
| chr3R | 4746259 | 4746761 | tacc      | 136   | 87.1611 | 10.67 |
| chr3R | 4803060 | 4803798 | ctrip     | 519   | 316.742 | 26.70 |
| chr3R | 4804271 | 4804629 | ctrip     | 1609  | 19.849  | 4.06  |
| chr3R | 4805989 | 4807216 | ctrip     | 86    | 316.742 | 18.21 |
| chr3R | 4807575 | 4808092 | ctrip     | 1373  | 258.955 | 19.33 |
| chr3R | 4811814 | 4812163 | ctrip     | 61    | 12.6592 | 3.03  |
| chr3R | 4811814 | 4812163 | Hus1-like | 61    | 12.6592 | 3.03  |
| chr3R | 4811814 | 4812163 | ctrip     | 61    | 12.6592 | 3.03  |
| chr3R | 4811814 | 4812163 | Hus1-like | 61    | 12.6592 | 3.03  |
| chr3R | 4820991 | 4821425 | CG14657   | 199   | 42.1634 | 5.54  |
| chr3R | 4835284 | 4835758 | CG14659   | 4215  | 72.9341 | 8.05  |
| chr3R | 4852208 | 4852944 | opa       | 324   | 294.633 | 16.05 |
| chr3R | 4910413 | 4911449 | Cdep      | 514   | 316.742 | 17.03 |
| chr3R | 4951707 | 4952801 | Ubc6      | 700   | 19.163  | 4.03  |
| chr3R | 4955082 | 4955764 | CG14661   | 205   | 292.769 | 23.71 |
| chr3R | 4999688 | 5000589 | CG2022    | 10618 | 33.5632 | 5.74  |
| chr3R | 5021179 | 5022015 | CR45585   | 5880  | 116.36  | 12.40 |
| chr3R | 5042789 | 5043473 | CR43635   | 2939  | 58.6731 | 7.33  |
| chr3R | 5074746 | 5075109 | corto     | 11778 | 14.3799 | 3.76  |
| chr3R | 5081640 | 5082066 | corto     | 4828  | 35.0776 | 4.89  |
| chr3R | 5086414 | 5088382 | corto     | 148   | 316.742 | 49.28 |
| chr3R | 5150610 | 5150917 | dpr16     | 130   | 18.347  | 4.21  |
| chr3R | 5215679 | 5217534 | cno       | 1025  | 316.742 | 22.99 |
| chr3R | 5221621 | 5222205 | CG2604    | 1491  | 26.3541 | 4.92  |
| chr3R | 5223093 | 5223431 | CG2604    | 25    | 28.8448 | 4.56  |
| chr3R | 5231639 | 5232427 | Kat60     | 82    | 12.8951 | 3.07  |
| chr3R | 5251136 | 5251841 | CG12163   | 174   | 47.9443 | 6.88  |
| chr3R | 5257038 | 5257748 | Hph       | 496   | 43.3581 | 6.38  |
| chr3R | 5263891 | 5265239 | CR45793   | 398   | 316.742 | 20.57 |
| chr3R | 5263891 | 5265239 | Hph       | 29    | 316.742 | 20.57 |
| chr3R | 5279712 | 5280233 | mtd       | 113   | 114.93  | 12.03 |
| chr3R | 5282508 | 5283634 | mtd       | 303   | 316.742 | 26.64 |
| chr3R | 5287144 | 5287613 | mtd       | 84    | 9.55719 | 2.79  |
| chr3R | 5315253 | 5315612 | mtd       | 7397  | 12.1831 | 3.24  |
| chr3R | 5319663 | 5320013 | mtd       | 4091  | 13.0388 | 3.47  |
| chr3R | 5346663 | 5347087 | mtd       | 3143  | 35.3551 | 5.49  |
| chr3R | 5349755 | 5350226 | mtd       | 56    | 64.7608 | 8.67  |
| chr3R | 5350491 | 5350963 | mtd       | 325   | 54.9599 | 7.11  |
| chr3R | 5361639 | 5362179 | Cerk      | 44    | 22.559  | 4.39  |
| chr3R | 5362938 | 5363857 | Cerk      | 1596  | 14.9793 | 3.36  |
| chr3R | 5367508 | 5368390 | Cerk      | 27    | 27.6062 | 4.96  |
| chr3R | 5371673 | 5372003 | Rpl118    | 55    | 16.5691 | 3.84  |
| chr3R | 5413557 | 5414641 | CG14669   | 173   | 188.858 | 19.62 |
| chr3R | 5464456 | 5464716 | PEK       | 98    | 8.29734 | 2.80  |
| chr3R | 5508387 | 5508712 | CG31547   | 5827  | 28.8275 | 6.03  |
| chr3R | 5517045 | 5518122 | ltp-r83A  | 151   | 70.7791 | 7.31  |
| chr3R | 5518591 | 5519151 | ltp-r83A  | 1728  | 222.307 | 14.95 |
| chr3R | 5519736 | 5520159 | ltp-r83A  | 2825  | 23.0437 | 4.81  |
| chr3R | 5523017 | 5523622 | CR43845   | 325   | 37.804  | 6.32  |
| chr3R | 5523017 | 5523622 | Nmdar1    | 117   | 37.804  | 6.32  |
| chr3R | 5547107 | 5547919 | CG2519    | 118   | 61.3134 | 6.93  |
| chr3R | 5564838 | 5565406 | CG12746   | 84    | 32.2279 | 4.93  |
| chr3R | 5571124 | 5571437 | CRMP      | 211   | 9.92322 | 2.82  |

|       |         |         |             |       |         |       |
|-------|---------|---------|-------------|-------|---------|-------|
| chr3R | 5587985 | 5588364 | CG2926      | 262   | 10.5759 | 3.11  |
| chr3R | 5591832 | 5592457 | Vha26       | 603   | 10.8707 | 2.87  |
| chr3R | 5599096 | 5601172 | kra         | 30    | 132.906 | 10.16 |
| chr3R | 5612299 | 5613173 | Rga         | 242   | 111.747 | 9.27  |
| chr3R | 5623153 | 5624578 | Spec2       | 173   | 58.3215 | 6.28  |
| chr3R | 5623153 | 5624578 | CG2911      | 173   | 58.3215 | 6.28  |
| chr3R | 5623153 | 5624578 | RpL13A      | 521   | 58.3215 | 6.28  |
| chr3R | 5647654 | 5649147 | MTA1-like   | 201   | 25.287  | 4.49  |
| chr3R | 5647654 | 5649147 | Sec23       | 527   | 25.287  | 4.49  |
| chr3R | 5654601 | 5654981 | elm         | 41    | 16.9268 | 3.46  |
| chr3R | 5659064 | 5659935 | CR44093     | 235   | 23.5664 | 4.11  |
| chr3R | 5659064 | 5659935 | CG2182      | 671   | 23.5664 | 4.11  |
| chr3R | 5668945 | 5671538 | Xe7         | 916   | 73.7602 | 7.14  |
| chr3R | 5668945 | 5671538 | Atg17       | 538   | 73.7602 | 7.14  |
| chr3R | 5672376 | 5673287 | Atg17       | 2945  | 314.503 | 21.09 |
| chr3R | 5685874 | 5686281 | plx         | 160   | 7.64017 | 2.49  |
| chr3R | 5701053 | 5701497 | plx         | 1354  | 60.4003 | 7.96  |
| chr3R | 5742366 | 5742890 | Sym         | 253   | 23.4605 | 4.45  |
| chr3R | 5742366 | 5742890 | Madm        | 220   | 23.4605 | 4.45  |
| chr3R | 5771785 | 5772266 | CG2082      | 192   | 50.2304 | 7.21  |
| chr3R | 5778903 | 5779504 | jagn        | 23    | 20.8953 | 4.14  |
| chr3R | 5781436 | 5782167 | kat-60L1    | 99    | 67.0045 | 9.70  |
| chr3R | 5801734 | 5802489 | CG11000     | 38    | 27.7809 | 5.20  |
| chr3R | 5812404 | 5812728 | CG42675     | 1022  | 32.4734 | 5.84  |
| chr3R | 5833841 | 5834416 | CG1208      | 749   | 15.6368 | 3.71  |
| chr3R | 5861930 | 5862383 | CG2017      | 206   | 11.5184 | 3.15  |
| chr3R | 5959409 | 5959810 | CG34113     | 44    | 26.1148 | 5.67  |
| chr3R | 6007335 | 6008719 | Rm62        | 148   | 174.979 | 12.89 |
| chr3R | 6097158 | 6097424 | Gasp        | 3575  | 10.3286 | 3.06  |
| chr3R | 6100809 | 6101286 | Gasp        | 191   | 40.5391 | 6.19  |
| chr3R | 6112555 | 6112956 | Obp83g      | 490   | 23.8339 | 5.05  |
| chr3R | 6198577 | 6198926 | Osi24       | 43    | 20.9461 | 5.04  |
| chr3R | 6343948 | 6344271 | CG17919     | 115   | 27.8114 | 5.52  |
| chr3R | 6350971 | 6351726 | Pak         | 503   | 43.5188 | 5.79  |
| chr3R | 6353238 | 6354132 | Pak         | 634   | 66.8543 | 8.65  |
| chr3R | 6373375 | 6373826 | CRAT        | 18    | 107.876 | 10.55 |
| chr3R | 6382964 | 6383600 | godzilla    | 239   | 14.9876 | 3.68  |
| chr3R | 6405157 | 6406021 | Dmtn        | 423   | 164.05  | 11.04 |
| chr3R | 6406694 | 6408051 | gpp         | 846   | 268.003 | 15.40 |
| chr3R | 6413861 | 6414827 | CR44017     | 5041  | 30.3392 | 5.57  |
| chr3R | 6419872 | 6420622 | CR44017     | 10472 | 35.2316 | 5.82  |
| chr3R | 6421600 | 6422166 | CR44017     | 12380 | 50.9213 | 6.99  |
| chr3R | 6424124 | 6424473 | CR44017     | 14735 | 16.7357 | 4.47  |
| chr3R | 6430133 | 6430487 | CR44017     | 20745 | 10.3226 | 3.48  |
| chr3R | 6435307 | 6435562 | CG9727      | 20949 | 9.04704 | 2.98  |
| chr3R | 6474481 | 6474823 | CG15186     | 3671  | 43.3746 | 5.96  |
| chr3R | 6593171 | 6593747 | dpr11       | 164   | 28.9409 | 6.06  |
| chr3R | 6646751 | 6647132 | Taf1        | 51    | 17.7837 | 3.56  |
| chr3R | 6678457 | 6678866 | lab         | 84    | 55.1862 | 7.40  |
| chr3R | 6741568 | 6742399 | pb          | 274   | 55.3146 | 7.02  |
| chr3R | 6791328 | 6792065 | Dfd         | 180   | 316.742 | 22.71 |
| chr3R | 6815670 | 6815980 | CR42651     | 561   | 10.9113 | 3.57  |
| chr3R | 6848404 | 6849095 | Scr         | 314   | 169.267 | 16.73 |
| chr3R | 6849865 | 6850329 | Scr         | 137   | 61.712  | 8.40  |
| chr3R | 6892971 | 6893815 | CR45559     | 126   | 191.477 | 13.43 |
| chr3R | 6912230 | 6913231 | CR43252     | 8256  | 51.6622 | 6.80  |
| chr3R | 6930391 | 6930892 | Antp        | 2187  | 83.0015 | 10.24 |
| chr3R | 6958515 | 6958915 | Antp        | 25929 | 21.1799 | 4.42  |
| chr3R | 6966703 | 6967068 | Antp        | 32334 | 27.8702 | 4.95  |
| chr3R | 7000505 | 7001385 | CR45899     | 524   | 313.678 | 20.10 |
| chr3R | 7037089 | 7037973 | CR44933     | 390   | 270.82  | 18.91 |
| chr3R | 7067042 | 7067402 | CG1105      | 194   | 6.75781 | 2.45  |
| chr3R | 7067042 | 7067402 | CG1965      | 70    | 6.75781 | 2.45  |
| chr3R | 7075252 | 7076072 | CR45908     | 208   | 24.4862 | 4.17  |
| chr3R | 7076122 | 7076866 | CG1943      | 7     | 8.25322 | 2.53  |
| chr3R | 7086341 | 7087467 | alphaTub84B | 40    | 117.939 | 9.25  |
| chr3R | 7089519 | 7090630 | alphaTub84B | 3844  | 38.4648 | 5.76  |
| chr3R | 7103368 | 7103674 | Alh         | 4883  | 30.2699 | 5.80  |
| chr3R | 7107480 | 7110283 | Alh         | 55    | 316.742 | 32.79 |
| chr3R | 7107480 | 7110283 | CR45906     | 1532  | 316.742 | 32.79 |
| chr3R | 7122177 | 7122448 | Alh         | 1365  | 9.59059 | 2.59  |
| chr3R | 7122817 | 7124804 | Alh         | 200   | 113.726 | 9.37  |
| chr3R | 7122817 | 7124804 | CG10098     | 609   | 113.726 | 9.37  |
| chr3R | 7129323 | 7129763 | CG31248     | 27    | 19.2889 | 4.06  |
| chr3R | 7162354 | 7163257 | sas         | 39    | 316.742 | 39.13 |

|       |         |         |             |       |         |       |
|-------|---------|---------|-------------|-------|---------|-------|
| chr3R | 7162354 | 7163257 | CR45909     | 168   | 316.742 | 39.13 |
| chr3R | 7167949 | 7168451 | CR45909     | 5357  | 35.9426 | 6.12  |
| chr3R | 7186376 | 7187696 | CG10055     | 578   | 316.742 | 22.94 |
| chr3R | 7186376 | 7187696 | lap         | 258   | 316.742 | 22.94 |
| chr3R | 7187967 | 7188339 | lap         | 1152  | 45.9589 | 6.53  |
| chr3R | 7223956 | 7224385 | CG14608     | 299   | 32.2995 | 6.46  |
| chr3R | 7265749 | 7266062 | Syt4        | 64    | 8.34778 | 2.77  |
| chr3R | 7266427 | 7266720 | Syt4        | 447   | 14.4282 | 3.96  |
| chr3R | 7306631 | 7307252 | CG42544     | 2340  | 105.341 | 9.82  |
| chr3R | 7309588 | 7310107 | rn          | 219   | 136.571 | 15.30 |
| chr3R | 7310528 | 7311027 | rn          | 1121  | 150.897 | 16.13 |
| chr3R | 7312879 | 7313593 | CR44334     | 408   | 316.742 | 21.73 |
| chr3R | 7394018 | 7394825 | CG42650     | 2830  | 55.25   | 7.87  |
| chr3R | 7474534 | 7474978 | snRNA:7SK   | 240   | 58.3215 | 6.28  |
| chr3R | 7491226 | 7491961 | alpha-Est10 | 65    | 316.742 | 34.04 |
| chr3R | 7506535 | 7506995 | alpha-Est9  | 1650  | 116.793 | 12.73 |
| chr3R | 7508488 | 7508766 | alpha-Est9  | 3593  | 13.589  | 3.44  |
| chr3R | 7512882 | 7513222 | alpha-Est8  | 2637  | 12.2876 | 3.50  |
| chr3R | 7515324 | 7516164 | alpha-Est8  | 29    | 96.2573 | 9.36  |
| chr3R | 7523488 | 7524160 | alpha-Est7  | 37    | 50.0299 | 6.08  |
| chr3R | 7536147 | 7536497 | alpha-Est5  | 53    | 26.2428 | 4.55  |
| chr3R | 7541054 | 7541506 | alpha-Est3  | 19    | 20.6741 | 4.27  |
| chr3R | 7548858 | 7549356 | alpha-Est1  | 103   | 23.2998 | 4.31  |
| chr3R | 7639277 | 7639806 | Nlg3        | 131   | 115.391 | 11.54 |
| chr3R | 7749818 | 7750361 | pyd3        | 38    | 266.354 | 18.89 |
| chr3R | 7753506 | 7753930 | pyd3        | 3637  | 60.3113 | 7.51  |
| chr3R | 7760728 | 7761457 | Sp7         | 26    | 316.742 | 29.77 |
| chr3R | 7793731 | 7794324 | CG2641      | 47    | 316.742 | 20.44 |
| chr3R | 7809485 | 7810653 | CG2993      | 315   | 45.4509 | 5.32  |
| chr3R | 7809485 | 7810653 | sgll        | 202   | 45.4509 | 5.32  |
| chr3R | 7813694 | 7813974 | CG34384     | 534   | 22.4092 | 4.48  |
| chr3R | 7821386 | 7822168 | CG34384     | 6     | 20.6741 | 4.27  |
| chr3R | 7884151 | 7884764 | CR46127     | 142   | 49.303  | 7.70  |
| chr3R | 7886078 | 7887137 | CG17816     | 61    | 101.939 | 10.31 |
| chr3R | 7886078 | 7887137 | CG10092     | 250   | 101.939 | 10.31 |
| chr3R | 7907074 | 7907691 | Taf7        | 227   | 12.5892 | 3.28  |
| chr3R | 7907074 | 7907691 | EMC1        | 196   | 12.5892 | 3.28  |
| chr3R | 7907074 | 7907691 | Taf7        | 78    | 12.5892 | 3.28  |
| chr3R | 7913017 | 7913332 | CG2846      | 74    | 13.8647 | 3.36  |
| chr3R | 7947123 | 7947872 | dsx         | 15319 | 316.742 | 25.57 |
| chr3R | 7962515 | 7964035 | dsx         | 206   | 141.387 | 12.63 |
| chr3R | 7964810 | 7965243 | dsx         | 2270  | 34.5905 | 5.43  |
| chr3R | 7966200 | 7968371 | dsx         | 536   | 316.742 | 38.43 |
| chr3R | 7968891 | 7969625 | dsx         | 1738  | 46.8918 | 6.86  |
| chr3R | 7977264 | 7977774 | CD98hc      | 95    | 12.354  | 3.04  |
| chr3R | 7985369 | 7985764 | Sfp84E      | 5375  | 6.58803 | 2.41  |
| chr3R | 7993524 | 7994068 | CG2781      | 2017  | 77.725  | 9.59  |
| chr3R | 7995628 | 7996328 | CG2781      | 152   | 189.043 | 14.69 |
| chr3R | 8001399 | 8001864 | CG2698      | 16    | 16.0637 | 3.90  |
| chr3R | 8026974 | 8027886 | CG2747      | 439   | 166.195 | 13.24 |
| chr3R | 8030179 | 8030766 | CG10903     | 54    | 15.813  | 3.39  |
| chr3R | 8059077 | 8059371 | mAChR-B     | 121   | 9.74428 | 3.38  |
| chr3R | 8094027 | 8094364 | CG7900      | 35    | 48.6506 | 8.24  |
| chr3R | 8105217 | 8106862 | puc         | 235   | 316.742 | 28.35 |
| chr3R | 8108780 | 8109321 | puc         | 2548  | 72.1761 | 7.24  |
| chr3R | 8111772 | 8112305 | CR44331     | 1981  | 26.0501 | 5.00  |
| chr3R | 8113341 | 8114612 | CR44331     | 430   | 37.5292 | 5.54  |
| chr3R | 8116224 | 8116584 | CR44331     | 2375  | 19.2554 | 4.10  |
| chr3R | 8119648 | 8120325 | CG7878      | 2687  | 316.742 | 25.90 |
| chr3R | 8122507 | 8122906 | CG7878      | 56    | 29.2625 | 4.83  |
| chr3R | 8126543 | 8127220 | Gie         | 239   | 134.4   | 11.06 |
| chr3R | 8181283 | 8182209 | grn         | 302   | 279.57  | 17.28 |
| chr3R | 8190711 | 8191324 | CR43302     | 6693  | 275.8   | 19.76 |
| chr3R | 8219976 | 8220239 | CG18249     | 93    | 12.6703 | 3.39  |
| chr3R | 8233342 | 8234053 | DNApol-iota | 12    | 15.8377 | 3.80  |
| chr3R | 8233342 | 8234053 | CR45549     | 119   | 15.8377 | 3.80  |
| chr3R | 8240240 | 8240582 | Ada2b       | 116   | 19.3532 | 4.36  |
| chr3R | 8250324 | 8250621 | mtg         | 69    | 15.6469 | 3.81  |
| chr3R | 8251631 | 8251924 | mtg         | 1300  | 14.6471 | 3.61  |
| chr3R | 8261425 | 8262147 | RpA-70      | 2755  | 250.384 | 15.53 |
| chr3R | 8308688 | 8309096 | tex         | 230   | 30.8454 | 5.10  |
| chr3R | 8317255 | 8318214 | Ctr1B       | 311   | 293.588 | 18.50 |
| chr3R | 8333726 | 8334652 | Poxm        | 169   | 61.4519 | 9.01  |
| chr3R | 8349760 | 8350111 | Atg13       | 119   | 16.7012 | 3.63  |
| chr3R | 8353067 | 8353592 | Atg13       | 3452  | 23.087  | 3.95  |



|       |         |         |                   |       |         |       |
|-------|---------|---------|-------------------|-------|---------|-------|
| chr3R | 8355832 | 8356109 | stck              | 992   | 12.9984 | 3.16  |
| chr3R | 8357127 | 8357796 | stck              | 69    | 11.2653 | 2.80  |
| chr3R | 8517752 | 8518447 | CG11737           | 267   | 16.2529 | 3.55  |
| chr3R | 8658598 | 8660530 | bel               | 1487  | 316.742 | 33.20 |
| chr3R | 8663424 | 8663843 | p                 | 277   | 18.1042 | 3.66  |
| chr3R | 8669016 | 8670884 | CG8036            | 70    | 241.948 | 13.27 |
| chr3R | 8669016 | 8670884 | p                 | 1137  | 241.948 | 13.27 |
| chr3R | 8697572 | 8698305 | hb                | 178   | 52.0851 | 7.86  |
| chr3R | 8746999 | 8748299 | CG9801            | 45    | 38.6252 | 5.35  |
| chr3R | 8746999 | 8748299 | CG8223            | 167   | 38.6252 | 5.35  |
| chr3R | 8792340 | 8792942 | Pif1A             | 121   | 205.007 | 16.85 |
| chr3R | 8792340 | 8792942 | Pif1B             | 121   | 205.007 | 16.85 |
| chr3R | 8805396 | 8805796 | CG9839            | 36    | 31.1664 | 4.98  |
| chr3R | 8819664 | 8820941 | CG9821            | 4     | 100.111 | 8.16  |
| chr3R | 8819664 | 8820941 | CR43130           | 83    | 100.111 | 8.16  |
| chr3R | 8821662 | 8822115 | CG8369            | 97    | 44.9389 | 6.51  |
| chr3R | 8823307 | 8823613 | lscU              | 738   | 15.8558 | 3.56  |
| chr3R | 8823932 | 8824202 | lscU              | 105   | 11.2848 | 3.06  |
| chr3R | 8846053 | 8847133 | pyd               | 5     | 62.2729 | 7.59  |
| chr3R | 8854812 | 8855210 | pyd               | 2627  | 28.3346 | 5.03  |
| chr3R | 8857516 | 8857906 | pyd               | 84    | 17.7496 | 3.92  |
| chr3R | 8930846 | 8932101 | pyd               | 23    | 127.929 | 9.65  |
| chr3R | 8938628 | 8939365 | skap              | 255   | 122.751 | 10.28 |
| chr3R | 8955593 | 8955885 | CG11966           | 7277  | 18.1418 | 4.67  |
| chr3R | 8980292 | 8981474 | CAHbeta           | 54    | 316.742 | 24.58 |
| chr3R | 9013555 | 9014918 | CG11984           | 149   | 75.5704 | 7.83  |
| chr3R | 9019668 | 9020034 | tgo               | 228   | 15.3773 | 3.65  |
| chr3R | 9033536 | 9034464 | neur              | 427   | 211.454 | 18.48 |
| chr3R | 9047455 | 9048938 | Rel               | 1     | 87.4689 | 7.78  |
| chr3R | 9047455 | 9048938 | Mst85C            | 814   | 87.4689 | 7.78  |
| chr3R | 9047455 | 9048938 | Nmdmc             | 821   | 87.4689 | 7.78  |
| chr3R | 9052360 | 9055728 | Kdm2              | 86    | 316.742 | 34.37 |
| chr3R | 9056124 | 9058268 | Kdm2              | 4015  | 316.742 | 41.59 |
| chr3R | 9157735 | 9158636 | pum               | 279   | 316.742 | 31.26 |
| chr3R | 9160167 | 9160716 | pum               | 2504  | 160.716 | 13.08 |
| chr3R | 9214812 | 9215311 | pum               | 11806 | 67.1236 | 7.79  |
| chr3R | 9226224 | 9228454 | pum               | 377   | 316.742 | 28.23 |
| chr3R | 9226224 | 9228454 | CR45196           | 915   | 316.742 | 28.23 |
| chr3R | 9228933 | 9230687 | CR45196           | 1528  | 316.742 | 23.17 |
| chr3R | 9235906 | 9237806 | pum               | 82    | 316.742 | 35.22 |
| chr3R | 9239730 | 9240269 | D1                | 273   | 146.669 | 11.99 |
| chr3R | 9334494 | 9334814 | CG8866            | 69    | 18.3726 | 3.88  |
| chr3R | 9338855 | 9339182 | CR43301           | 986   | 23.5552 | 4.35  |
| chr3R | 9339563 | 9339961 | CR43301           | 289   | 8.72213 | 2.57  |
| chr3R | 9340743 | 9342793 | CG45050           | 819   | 220.576 | 12.99 |
| chr3R | 9350577 | 9351185 | noRNA:Me18S-G1358 | 3432  | 210.369 | 17.45 |
| chr3R | 9351539 | 9354193 | noRNA:Me18S-G1358 | 1109  | 316.742 | 33.10 |
| chr3R | 9359359 | 9359785 | CG45050           | 3623  | 113.796 | 13.54 |
| chr3R | 9359359 | 9359785 | CG43675           | 3623  | 113.796 | 13.54 |
| chr3R | 9393511 | 9393871 | CR46145           | 229   | 18.6407 | 4.21  |
| chr3R | 9394143 | 9394864 | FER               | 63    | 316.742 | 27.98 |
| chr3R | 9400969 | 9401399 | RpL34b            | 9     | 16.1275 | 3.27  |
| chr3R | 9417455 | 9419779 | ps                | 95    | 316.742 | 45.89 |
| chr3R | 9420330 | 9421399 | ps                | 1144  | 124.592 | 11.52 |
| chr3R | 9422080 | 9422715 | ps                | 2712  | 13.3521 | 2.96  |
| chr3R | 9427925 | 9428940 | ps                | 135   | 316.742 | 42.45 |
| chr3R | 9429976 | 9430454 | ps                | 1766  | 13.3836 | 3.15  |
| chr3R | 9432823 | 9433287 | ps                | 472   | 61.8142 | 7.07  |
| chr3R | 9434939 | 9437099 | ps                | 96    | 316.742 | 27.90 |
| chr3R | 9437479 | 9437826 | ps                | 791   | 7.25069 | 2.50  |
| chr3R | 9459489 | 9460127 | GstZ2             | 508   | 18.6954 | 4.35  |
| chr3R | 9460557 | 9460975 | GstZ2             | 126   | 72.7217 | 7.38  |
| chr3R | 9491025 | 9491568 | CG16779           | 2316  | 36.1316 | 6.34  |
| chr3R | 9493579 | 9494060 | CG16779           | 131   | 99.1978 | 9.98  |
| chr3R | 9501678 | 9503154 | RhoL              | 41    | 316.742 | 28.51 |
| chr3R | 9512124 | 9513382 | Ras85D            | 225   | 316.742 | 24.95 |
| chr3R | 9512124 | 9513382 | Rib1              | 484   | 316.742 | 24.95 |
| chr3R | 9515988 | 9516777 | CG8176            | 116   | 14.0432 | 3.07  |
| chr3R | 9515988 | 9516777 | JHDM2             | 116   | 14.0432 | 3.07  |
| chr3R | 9515988 | 9516777 | CG8176            | 116   | 14.0432 | 3.07  |
| chr3R | 9528470 | 9528800 | by                | 4417  | 14.0984 | 3.70  |
| chr3R | 9532148 | 9534205 | by                | 607   | 316.742 | 36.62 |
| chr3R | 9534546 | 9535099 | by                | 1794  | 316.742 | 21.53 |
| chr3R | 9542614 | 9542875 | mura              | 8543  | 15.5456 | 3.50  |
| chr3R | 9543460 | 9543969 | mura              | 7614  | 103.314 | 9.70  |

|       |          |          |             |       |         |       |
|-------|----------|----------|-------------|-------|---------|-------|
| chr3R | 9550518  | 9551895  | mura        | 470   | 316.742 | 47.60 |
| chr3R | 9550518  | 9551895  | CR42549     | 489   | 316.742 | 47.60 |
| chr3R | 9550518  | 9551895  | mura        | 938   | 316.742 | 47.60 |
| chr3R | 9550518  | 9551895  | CR42549     | 938   | 316.742 | 47.60 |
| chr3R | 9559640  | 9560008  | MBD-like    | 27    | 9.92342 | 2.76  |
| chr3R | 9570403  | 9571730  | CG9396      | 1052  | 25.012  | 4.50  |
| chr3R | 9573244  | 9574273  | CG9399      | 69    | 316.742 | 21.42 |
| chr3R | 9577439  | 9578086  | Kap-alpha3  | 4     | 10.7472 | 2.95  |
| chr3R | 9577439  | 9578086  | CG8273      | 304   | 10.7472 | 2.95  |
| chr3R | 9581126  | 9581691  | CG8301      | 62    | 98.5129 | 10.89 |
| chr3R | 9586747  | 9587178  | P58IPK      | 35    | 13.2052 | 3.06  |
| chr3R | 9591161  | 9591539  | CG8312      | 86    | 20.9105 | 3.71  |
| chr3R | 9593647  | 9593956  | CG8312      | 1938  | 8.77179 | 2.73  |
| chr3R | 9603380  | 9603948  | CG8312      | 11676 | 23.2866 | 4.11  |
| chr3R | 9630015  | 9631085  | Calr        | 13    | 51.2475 | 5.61  |
| chr3R | 9704136  | 9705712  | Unc-115a    | 493   | 316.742 | 20.84 |
| chr3R | 9710424  | 9711154  | trbd        | 7     | 17.4916 | 3.52  |
| chr3R | 9710424  | 9711154  | dmt         | 111   | 17.4916 | 3.52  |
| chr3R | 9725364  | 9725676  | hyd         | 143   | 8.42048 | 2.46  |
| chr3R | 9739987  | 9740509  | CG12950     | 411   | 13.0388 | 3.47  |
| chr3R | 9747067  | 9747587  | CG12948     | 173   | 49.5782 | 6.14  |
| chr3R | 9762807  | 9763088  | Snap24      | 202   | 15.4574 | 3.83  |
| chr3R | 9767726  | 9768059  | MED6        | 72    | 10.2455 | 2.82  |
| chr3R | 9767726  | 9768059  | CG8481      | 54    | 10.2455 | 2.82  |
| chr3R | 9784485  | 9784905  | CG8500      | 45    | 19.4237 | 4.51  |
| chr3R | 9800797  | 9801135  | CG9467      | 0     | 13.0387 | 3.28  |
| chr3R | 9808703  | 9809413  | FBXO11      | 237   | 65.5175 | 6.17  |
| chr3R | 9865688  | 9866722  | Teh1        | 2038  | 245.168 | 18.42 |
| chr3R | 9867956  | 9868859  | Teh1        | 209   | 88.1412 | 9.46  |
| chr3R | 9872221  | 9872817  | Glut4EF     | 2185  | 134.018 | 10.37 |
| chr3R | 9873374  | 9875238  | Glut4EF     | 74    | 316.742 | 25.07 |
| chr3R | 9877467  | 9878257  | CR45029     | 632   | 185.576 | 14.20 |
| chr3R | 9884470  | 9884952  | CR45029     | 6210  | 60.3113 | 7.51  |
| chr3R | 9906999  | 9907554  | Glut4EF     | 21792 | 18.5328 | 3.96  |
| chr3R | 9928264  | 9929253  | Glut4EF     | 183   | 316.742 | 36.14 |
| chr3R | 9931673  | 9933696  | Glut4EF     | 3711  | 165.3   | 13.32 |
| chr3R | 9946281  | 9947055  | Glut4EF     | 17855 | 92.1503 | 9.36  |
| chr3R | 9947557  | 9948060  | Glut4EF     | 18959 | 14.2573 | 3.20  |
| chr3R | 9949651  | 9950505  | Glut4EF     | 21162 | 316.742 | 22.87 |
| chr3R | 9950914  | 9951405  | Glut4EF     | 22339 | 16.5971 | 3.75  |
| chr3R | 9951688  | 9952216  | Glut4EF     | 23031 | 23.665  | 4.37  |
| chr3R | 9952506  | 9953438  | Glut4EF     | 24183 | 148.583 | 11.89 |
| chr3R | 9954292  | 9955290  | Glut4EF     | 26086 | 35.258  | 4.96  |
| chr3R | 9978918  | 9979688  | Art4        | 6823  | 81.1517 | 9.08  |
| chr3R | 9982444  | 9982862  | Art4        | 3496  | 14.1991 | 3.61  |
| chr3R | 9985734  | 9986343  | Art4        | 53    | 15.535  | 3.38  |
| chr3R | 10035116 | 10035552 | Mical       | 7426  | 46.7085 | 6.91  |
| chr3R | 10038976 | 10039304 | Mical       | 3646  | 18.6178 | 4.09  |
| chr3R | 10042518 | 10043022 | Mical       | 37    | 25.6344 | 4.85  |
| chr3R | 10042518 | 10043022 | Mical       | 37    | 25.6344 | 4.85  |
| chr3R | 10048599 | 10048955 | CG12811     | 15    | 51.1752 | 6.44  |
| chr3R | 10070222 | 10070557 | nerfin-2    | 734   | 19.8065 | 4.46  |
| chr3R | 10077347 | 10079891 | CG5361      | 4075  | 316.742 | 29.53 |
| chr3R | 10080365 | 10081259 | CR45054     | 2540  | 148.299 | 10.10 |
| chr3R | 10081529 | 10083519 | CR45054     | 375   | 316.742 | 23.09 |
| chr3R | 10084016 | 10085397 | CR45054     | 963   | 316.742 | 21.49 |
| chr3R | 10086104 | 10086538 | CR45054     | 2920  | 22.0936 | 3.97  |
| chr3R | 10086937 | 10088207 | mir-317     | 3844  | 316.742 | 25.10 |
| chr3R | 10088912 | 10090455 | mir-317     | 1707  | 316.742 | 40.23 |
| chr3R | 10093188 | 10095224 | CR43459     | 128   | 316.742 | 22.45 |
| chr3R | 10109060 | 10110308 | Fmr1        | 161   | 316.742 | 32.14 |
| chr3R | 10111972 | 10112395 | CG3940      | 68    | 98.2742 | 11.31 |
| chr3R | 10124884 | 10125153 | knk         | 648   | 22.3929 | 4.48  |
| chr3R | 10133067 | 10134495 | twc         | 433   | 106.852 | 9.95  |
| chr3R | 10139546 | 10140478 | twc         | 473   | 280.265 | 19.76 |
| chr3R | 10144544 | 10145016 | Invadolysin | 83    | 62.4795 | 6.37  |
| chr3R | 10170179 | 10170894 | Best1       | 66    | 316.742 | 32.55 |
| chr3R | 10188914 | 10191295 | CG12814     | 77    | 313.645 | 16.86 |
| chr3R | 10188914 | 10191295 | Syn         | 1008  | 313.645 | 16.86 |
| chr3R | 10212792 | 10213947 | Timp        | 26    | 65.2944 | 7.67  |
| chr3R | 10226377 | 10227024 | CG42795     | 85    | 29.8095 | 5.17  |
| chr3R | 10264063 | 10265349 | CG43143     | 82    | 123.499 | 9.69  |
| chr3R | 10267028 | 10267552 | CG43143     | 3014  | 156.047 | 13.45 |
| chr3R | 10268196 | 10268560 | CG43143     | 4123  | 43.776  | 6.79  |
| chr3R | 10311443 | 10311855 | CG6293      | 43    | 100.984 | 11.45 |

|       |          |          |          |       |         |       |
|-------|----------|----------|----------|-------|---------|-------|
| chr3R | 10331179 | 10331436 | Bruce    | 82    | 8.03147 | 2.49  |
| chr3R | 10349990 | 10351117 | jumu     | 608   | 82.6389 | 7.62  |
| chr3R | 10351867 | 10352434 | jumu     | 1973  | 55.3146 | 7.02  |
| chr3R | 10356034 | 10356815 | jumu     | 6394  | 81.1455 | 10.00 |
| chr3R | 10368300 | 10368692 | Rfx      | 1048  | 35.1247 | 6.04  |
| chr3R | 10378323 | 10378587 | Rfx      | 413   | 12.1332 | 3.15  |
| chr3R | 10379823 | 10380575 | Rfx      | 2362  | 12.5094 | 2.94  |
| chr3R | 10380974 | 10381278 | CR44938  | 2650  | 29.0413 | 5.38  |
| chr3R | 10384390 | 10384941 | CR44938  | 880   | 289.558 | 20.21 |
| chr3R | 10387005 | 10387452 | CR44938  | 237   | 316.742 | 47.15 |
| chr3R | 10388126 | 10389467 | cwo      | 17    | 249.801 | 24.32 |
| chr3R | 10393375 | 10393771 | cwo      | 5351  | 21.3272 | 4.12  |
| chr3R | 10434714 | 10435258 | Cyp12e1  | 289   | 56.2627 | 7.77  |
| chr3R | 10527614 | 10528024 | mir-4944 | 14664 | 49.5146 | 7.08  |
| chr3R | 10535658 | 10536211 | mir-4944 | 22802 | 316.742 | 24.46 |
| chr3R | 10546583 | 10547173 | mir-4944 | 33914 | 16.0637 | 3.90  |
| chr3R | 10556749 | 10557686 | mir-4944 | 43860 | 115.431 | 12.23 |
| chr3R | 10567432 | 10567866 | hth      | 46697 | 9.67102 | 2.88  |
| chr3R | 10587968 | 10589176 | hth      | 25339 | 32.277  | 5.35  |
| chr3R | 10592942 | 10593349 | hth      | 21118 | 20.5466 | 4.49  |
| chr3R | 10613982 | 10615176 | hth      | 241   | 316.742 | 24.38 |
| chr3R | 10616433 | 10617540 | hth      | 2989  | 241.443 | 16.81 |
| chr3R | 10622062 | 10622685 | hth      | 8065  | 316.742 | 19.98 |
| chr3R | 10638707 | 10640035 | CR44018  | 400   | 65.7345 | 8.75  |
| chr3R | 10638707 | 10640035 | hth      | 690   | 65.7345 | 8.75  |
| chr3R | 10640560 | 10641095 | hth      | 1310  | 49.182  | 6.85  |
| chr3R | 10664838 | 10665672 | CG6465   | 12024 | 172.827 | 14.42 |
| chr3R | 10680875 | 10681134 | CG14688  | 48    | 16.8016 | 3.79  |
| chr3R | 10686728 | 10686995 | Skeletor | 91    | 18.9621 | 4.63  |
| chr3R | 10696679 | 10697118 | CG14683  | 428   | 9.58397 | 2.86  |
| chr3R | 10696679 | 10697118 | pug      | 428   | 9.58397 | 2.86  |
| chr3R | 10699378 | 10699760 | pug      | 58    | 34.0246 | 6.35  |
| chr3R | 10761088 | 10761681 | Cap-H2   | 16    | 32.8175 | 4.67  |
| chr3R | 10826567 | 10827382 | Cad86C   | 88    | 316.742 | 44.26 |
| chr3R | 10849596 | 10850631 | CG42394  | 16    | 87.9453 | 8.44  |
| chr3R | 10852261 | 10852590 | CG4565   | 242   | 16.4955 | 4.00  |
| chr3R | 10859984 | 10860245 | CG14694  | 333   | 15.8227 | 4.03  |
| chr3R | 10868193 | 10868866 | SelR     | 20    | 23.1791 | 4.24  |
| chr3R | 10868193 | 10868866 | Tsp86D   | 85    | 23.1791 | 4.24  |
| chr3R | 10872095 | 10872514 | Fdh      | 87    | 36.6054 | 5.39  |
| chr3R | 10875822 | 10876544 | Sodh-2   | 334   | 81.8076 | 9.79  |
| chr3R | 10881839 | 10882344 | Tpc1     | 30    | 12.5931 | 3.09  |
| chr3R | 10884887 | 10885994 | CG14696  | 551   | 193.03  | 13.18 |
| chr3R | 10884887 | 10885994 | Leash    | 13    | 193.03  | 13.18 |
| chr3R | 10886379 | 10887375 | Leash    | 1527  | 316.742 | 30.65 |
| chr3R | 10888535 | 10889726 | Adk3     | 142   | 316.742 | 46.58 |
| chr3R | 10970886 | 10971841 | CG34114  | 729   | 44.8251 | 7.72  |
| chr3R | 10972112 | 10972508 | CG34114  | 44    | 22.6835 | 4.48  |
| chr3R | 11128155 | 11128642 | Ugt86Dd  | 70    | 39.9166 | 6.57  |
| chr3R | 11156625 | 11157429 | Ugt86Da  | 111   | 316.742 | 61.20 |
| chr3R | 11172828 | 11173188 | Ugt35a   | 365   | 60.4003 | 7.96  |
| chr3R | 11196823 | 11198396 | cu       | 113   | 306.554 | 19.06 |
| chr3R | 11199948 | 11200906 | cu       | 208   | 316.742 | 25.16 |
| chr3R | 11210073 | 11210497 | Tctp     | 6     | 35.1771 | 4.81  |
| chr3R | 11211251 | 11211867 | Tctp     | 1350  | 31.2463 | 4.88  |
| chr3R | 11221452 | 11222042 | CG6693   | 221   | 24.5734 | 4.23  |
| chr3R | 11221452 | 11222042 | RpL3     | 33    | 24.5734 | 4.23  |
| chr3R | 11243445 | 11244616 | CG17734  | 299   | 20.8254 | 3.52  |
| chr3R | 11243445 | 11244616 | CG5214   | 3     | 20.8254 | 3.52  |
| chr3R | 11254450 | 11254866 | CR43283  | 1479  | 79.5904 | 9.20  |
| chr3R | 11281561 | 11282144 | CR31386  | 23848 | 33.1559 | 6.56  |
| chr3R | 11302809 | 11303394 | CR31386  | 2527  | 107.394 | 13.42 |
| chr3R | 11312262 | 11312621 | CR45055  | 1790  | 39.5395 | 7.19  |
| chr3R | 11330577 | 11331898 | pros     | 1717  | 92.1126 | 10.32 |
| chr3R | 11334298 | 11334884 | pros     | 397   | 32.606  | 6.22  |
| chr3R | 11335530 | 11336312 | CR46008  | 581   | 35.813  | 6.76  |
| chr3R | 11341199 | 11341506 | CR46008  | 5051  | 9.69643 | 3.19  |
| chr3R | 11352952 | 11353725 | KP78a    | 106   | 220.792 | 19.37 |
| chr3R | 11352952 | 11353725 | KP78b    | 106   | 220.792 | 19.37 |
| chr3R | 11371816 | 11372930 | pros     | 759   | 41.9596 | 6.99  |
| chr3R | 11458083 | 11458338 | PGRP-LB  | 189   | 23.3221 | 4.87  |
| chr3R | 11483376 | 11483780 | CR45581  | 3232  | 49.539  | 8.20  |
| chr3R | 11499784 | 11500149 | dpr5     | 28    | 35.3264 | 6.54  |
| chr3R | 11542614 | 11543505 | dpr4     | 104   | 86.1693 | 10.73 |
| chr3R | 11557750 | 11558334 | CG10898  | 271   | 37.9558 | 5.10  |

|       |          |          |                    |       |         |       |
|-------|----------|----------|--------------------|-------|---------|-------|
| chr3R | 11561862 | 11563539 | sea                | 408   | 202.664 | 16.36 |
| chr3R | 11566449 | 11567528 | fabp               | 64    | 316.742 | 19.90 |
| chr3R | 11566449 | 11567528 | sea                | 64    | 316.742 | 19.90 |
| chr3R | 11568598 | 11570204 | Mrp4               | 86    | 316.742 | 44.44 |
| chr3R | 11581438 | 11582340 | wkd                | 218   | 147.059 | 12.95 |
| chr3R | 11582981 | 11583407 | wkd                | 268   | 58.431  | 7.89  |
| chr3R | 11589783 | 11590089 | CG6791             | 119   | 5.95359 | 2.27  |
| chr3R | 11604231 | 11605254 | Jupiter            | 140   | 316.742 | 42.23 |
| chr3R | 11619680 | 11619956 | Jupiter            | 62    | 9.93728 | 2.53  |
| chr3R | 11646778 | 11647418 | Csk                | 146   | 176.596 | 13.78 |
| chr3R | 11647741 | 11648193 | Csk                | 1045  | 25.1315 | 4.22  |
| chr3R | 11648713 | 11649255 | Csk                | 1726  | 15.629  | 3.87  |
| chr3R | 11650343 | 11651056 | Csk                | 116   | 25.7164 | 4.41  |
| chr3R | 11650343 | 11651056 | Elp1               | 380   | 25.7164 | 4.41  |
| chr3R | 11655722 | 11657075 | CG42327            | 18    | 316.742 | 19.04 |
| chr3R | 11661071 | 11661448 | CG42327            | 5108  | 25.4032 | 4.87  |
| chr3R | 11669524 | 11670070 | CG14715            | 4541  | 23.2431 | 4.65  |
| chr3R | 11684036 | 11684413 | CG6830             | 80    | 24.1324 | 4.76  |
| chr3R | 11687964 | 11688368 | CG6834             | 66    | 21.7007 | 4.53  |
| chr3R | 11689685 | 11691475 | CG6908             | 1150  | 99.2472 | 10.27 |
| chr3R | 11694704 | 11695429 | Fer3               | 895   | 37.6451 | 6.05  |
| chr3R | 11749742 | 11750115 | CG6923             | 137   | 12.6214 | 3.13  |
| chr3R | 11756784 | 11757046 | Lk6                | 3142  | 16.9534 | 3.77  |
| chr3R | 11758280 | 11762137 | Lk6                | 85    | 316.742 | 27.18 |
| chr3R | 11762438 | 11762871 | Lk6                | 1819  | 43.4259 | 5.55  |
| chr3R | 11763427 | 11764686 | Lk6                | 541   | 253.707 | 15.92 |
| chr3R | 11770842 | 11771123 | l(3)neo38          | 610   | 13.1443 | 3.71  |
| chr3R | 11773331 | 11774201 | l(3)neo38          | 303   | 316.742 | 24.68 |
| chr3R | 11777766 | 11779345 | l(3)neo38          | 55    | 140.653 | 11.20 |
| chr3R | 11779608 | 11781114 | CR45595            | 82    | 316.742 | 20.49 |
| chr3R | 11786612 | 11787167 | CG17360            | 112   | 6.68471 | 2.46  |
| chr3R | 11812725 | 11813586 | CIC-a              | 5     | 111.608 | 9.47  |
| chr3R | 11819046 | 11819675 | glo                | 62    | 14.4244 | 3.34  |
| chr3R | 11819046 | 11819675 | COX5A              | 81    | 14.4244 | 3.34  |
| chr3R | 11865080 | 11865495 | CG6959             | 4093  | 27.8929 | 4.66  |
| chr3R | 11868486 | 11869676 | CG6959             | 37    | 97.255  | 9.42  |
| chr3R | 11869953 | 11870372 | CG6959             | 571   | 10.4133 | 2.70  |
| chr3R | 11886723 | 11888580 | mthl5              | 45    | 316.742 | 48.34 |
| chr3R | 11923244 | 11923623 | CG14731            | 7872  | 32.8269 | 6.00  |
| chr3R | 11948617 | 11949342 | Cad87A             | 44    | 196.193 | 12.13 |
| chr3R | 11949640 | 11950025 | CG31211            | 99    | 12.0506 | 3.06  |
| chr3R | 11958078 | 11958761 | Hsp70Aa            | 14    | 316.742 | 23.73 |
| chr3R | 11958078 | 11958761 | Hsp70Ab            | 13    | 316.742 | 23.73 |
| chr3R | 11967620 | 11968215 | CG12213            | 276   | 55.5753 | 7.14  |
| chr3R | 11967620 | 11968215 | GC1                | 260   | 55.5753 | 7.14  |
| chr3R | 11980057 | 11980594 | CG18547            | 55    | 272.345 | 22.27 |
| chr3R | 11981925 | 11983043 | CG12224            | 281   | 33.6709 | 5.04  |
| chr3R | 11984186 | 11985138 | CG3397             | 43    | 50.3978 | 7.15  |
| chr3R | 11990283 | 11990540 | mfas               | 360   | 14.8813 | 3.82  |
| chr3R | 11992919 | 11993662 | mfas               | 59    | 288.907 | 19.37 |
| chr3R | 12078654 | 12081096 | ATP8B              | 860   | 316.742 | 22.90 |
| chr3R | 12090180 | 12090984 | ATP8B              | 96    | 316.742 | 21.44 |
| chr3R | 12158497 | 12158792 | dpr15              | 51    | 14.6003 | 3.81  |
| chr3R | 12182351 | 12182657 | CG4810             | 12524 | 42.0673 | 7.55  |
| chr3R | 12221293 | 12221564 | CG4860             | 46    | 16.6802 | 3.58  |
| chr3R | 12244364 | 12244934 | CR45582            | 365   | 172.306 | 14.23 |
| chr3R | 12278780 | 12279513 | svp                | 1945  | 250.907 | 17.09 |
| chr3R | 12280554 | 12281334 | svp                | 144   | 316.742 | 26.38 |
| chr3R | 12367482 | 12368024 | GstD9              | 120   | 114.186 | 11.34 |
| chr3R | 12368934 | 12369759 | GstD1              | 64    | 316.742 | 27.93 |
| chr3R | 12370369 | 12371135 | CR46015            | 415   | 94.3243 | 10.71 |
| chr3R | 12398768 | 12399057 | lig3               | 2971  | 11.3914 | 3.12  |
| chr3R | 12405624 | 12406119 | Cyp9f2             | 121   | 34.5905 | 5.43  |
| chr3R | 12406585 | 12407463 | CG5167             | 308   | 14.7626 | 3.73  |
| chr3R | 12425870 | 12426286 | Pp1-87B            | 255   | 13.34   | 3.34  |
| chr3R | 12442679 | 12443374 | Desat1             | 650   | 121.756 | 8.74  |
| chr3R | 12443834 | 12444238 | Desat1             | 19    | 13.4897 | 3.17  |
| chr3R | 12448785 | 12450079 | CG18549            | 250   | 107.239 | 8.73  |
| chr3R | 12451849 | 12452325 | CG5509             | 263   | 27.4601 | 5.36  |
| chr3R | 12467676 | 12468089 | Hsp70Ba            | 123   | 316.742 | 50.73 |
| chr3R | 12477327 | 12477759 | agamma-element:CR3 | 790   | 316.742 | 29.71 |
| chr3R | 12505774 | 12506064 | Hsp70Bb            | 126   | 110.041 | 6.33  |
| chr3R | 12595403 | 12596261 | Octbeta2R          | 296   | 255.361 | 17.14 |
| chr3R | 12626613 | 12628881 | Vha55              | 655   | 27.1007 | 4.39  |
| chr3R | 12626613 | 12628881 | Snx3               | 984   | 27.1007 | 4.39  |

|       |          |          |           |       |         |       |
|-------|----------|----------|-----------|-------|---------|-------|
| chr3R | 12642466 | 12642777 | CG6753    | 90    | 10.3226 | 3.48  |
| chr3R | 12653530 | 12654707 | CG6225    | 83    | 55.0313 | 7.46  |
| chr3R | 12689217 | 12689639 | kar       | 78    | 62.8958 | 8.52  |
| chr3R | 12717138 | 12717874 | Men       | 2107  | 31.1506 | 5.29  |
| chr3R | 12718202 | 12718713 | Men       | 1299  | 41.3993 | 5.37  |
| chr3R | 12719387 | 12720255 | Men       | 152   | 316.742 | 28.50 |
| chr3R | 12720622 | 12721068 | Men       | 72    | 52.4145 | 7.52  |
| chr3R | 12783145 | 12783628 | beat-Vc   | 273   | 22.3373 | 4.80  |
| chr3R | 12848370 | 12848743 | beat-Va   | 169   | 32.1474 | 5.69  |
| chr3R | 12857113 | 12857971 | CG10126   | 48    | 149.343 | 13.08 |
| chr3R | 12915801 | 12916210 | beat-Vb   | 86    | 28.5516 | 5.14  |
| chr3R | 12961485 | 12961890 | grsm      | 77    | 28.0128 | 4.25  |
| chr3R | 12961485 | 12961890 | Spc25     | 24    | 28.0128 | 4.25  |
| chr3R | 12974326 | 12974699 | CG7381    | 72    | 32.4941 | 6.11  |
| chr3R | 12981019 | 12981332 | Paip2     | 21    | 8.13585 | 2.54  |
| chr3R | 12981990 | 12982411 | Paip2     | 1055  | 8.64876 | 2.48  |
| chr3R | 12982436 | 12983394 | Paip2     | 2186  | 10.0372 | 2.72  |
| chr3R | 12994650 | 12995362 | yellow-f2 | 2     | 73.7425 | 7.72  |
| chr3R | 12997995 | 12998369 | CG7518    | 53    | 12.8367 | 3.13  |
| chr3R | 13010992 | 13011263 | CG8031    | 274   | 13.2696 | 3.25  |
| chr3R | 13011659 | 13013354 | CtBP      | 987   | 308.214 | 20.21 |
| chr3R | 13015419 | 13017016 | CtBP      | 1003  | 51.1702 | 6.95  |
| chr3R | 13017484 | 13018026 | CtBP      | 557   | 26.7911 | 4.53  |
| chr3R | 13032467 | 13032736 | ry        | 17    | 8.50399 | 2.61  |
| chr3R | 13051159 | 13051721 | CG7966    | 0     | 316.445 | 17.89 |
| chr3R | 13052032 | 13052696 | pic       | 253   | 75.6889 | 7.20  |
| chr3R | 13063978 | 13064682 | sim       | 1881  | 149.072 | 11.43 |
| chr3R | 13155533 | 13155968 | 2mit      | 82    | 52.6919 | 8.20  |
| chr3R | 13155533 | 13155968 | CR45109   | 82    | 52.6919 | 8.20  |
| chr3R | 13208301 | 13208704 | CG8483    | 5937  | 56.639  | 6.72  |
| chr3R | 13232864 | 13233158 | CG8476    | 12423 | 9.62707 | 2.91  |
| chr3R | 13240394 | 13240983 | Ace       | 18154 | 113.464 | 11.66 |
| chr3R | 13258526 | 13259672 | Ace       | 103   | 260.113 | 16.60 |
| chr3R | 13260173 | 13260616 | CG11686   | 33    | 35.7141 | 5.03  |
| chr3R | 13304567 | 13305077 | CG32473   | 18    | 95.1742 | 10.32 |
| chr3R | 13318189 | 13318760 | CG45080   | 845   | 316.742 | 22.50 |
| chr3R | 13364048 | 13365405 | poly      | 535   | 316.742 | 33.05 |
| chr3R | 13364048 | 13365405 | Dic1      | 186   | 316.742 | 33.05 |
| chr3R | 13379289 | 13380000 | CG9813    | 21    | 86.0104 | 9.31  |
| chr3R | 13379289 | 13380000 | CG8870    | 45    | 86.0104 | 9.31  |
| chr3R | 13382037 | 13383064 | Droj2     | 9     | 102.172 | 8.65  |
| chr3R | 13401091 | 13402100 | GILT1     | 43    | 237.808 | 20.04 |
| chr3R | 13434123 | 13435166 | yrt       | 24    | 15.2632 | 3.33  |
| chr3R | 13450231 | 13450722 | CG14372   | 113   | 37.5953 | 6.28  |
| chr3R | 13466008 | 13466594 | CR17025   | 164   | 22.0711 | 4.81  |
| chr3R | 13466008 | 13466594 | CR45914   | 224   | 22.0711 | 4.81  |
| chr3R | 13538748 | 13539320 | CG31337   | 6464  | 44.8909 | 7.20  |
| chr3R | 13554054 | 13554361 | CG31337   | 8821  | 35.0866 | 6.30  |
| chr3R | 13644638 | 13646324 | sqd       | 1040  | 316.742 | 28.58 |
| chr3R | 13646851 | 13648155 | rin       | 891   | 109.777 | 9.17  |
| chr3R | 13660176 | 13660607 | Hrb87F    | 71    | 20.0988 | 3.74  |
| chr3R | 13661202 | 13661810 | B52       | 111   | 17.5197 | 3.28  |
| chr3R | 13674425 | 13674761 | Task6     | 93    | 24.9208 | 4.78  |
| chr3R | 13676490 | 13676771 | Lkb1      | 45    | 10.0339 | 3.08  |
| chr3R | 13676490 | 13676771 | CG9588    | 88    | 10.0339 | 3.08  |
| chr3R | 13676490 | 13676771 | Lkb1      | 95    | 10.0339 | 3.08  |
| chr3R | 13683623 | 13685506 | fifl      | 292   | 316.742 | 32.28 |
| chr3R | 13686110 | 13686981 | omd       | 471   | 116.65  | 9.65  |
| chr3R | 13714951 | 13715524 | CG34383   | 50    | 211.763 | 16.16 |
| chr3R | 13735333 | 13735684 | CG34383   | 51    | 19.4612 | 4.20  |
| chr3R | 13782286 | 13783037 | Dip-B     | 34    | 225.514 | 14.96 |
| chr3R | 13794338 | 13795411 | CR45590   | 8417  | 316.742 | 36.78 |
| chr3R | 13796572 | 13797075 | CR45590   | 10248 | 50.8044 | 6.74  |
| chr3R | 13797837 | 13798401 | CR45590   | 11728 | 10.713  | 3.10  |
| chr3R | 13800029 | 13801320 | tal-2A    | 12414 | 26.8125 | 5.39  |
| chr3R | 13800029 | 13801320 | tal-1A    | 12414 | 26.8125 | 5.39  |
| chr3R | 13800029 | 13801320 | tal-AA    | 12414 | 26.8125 | 5.39  |
| chr3R | 13800029 | 13801320 | tal-3A    | 12414 | 26.8125 | 5.39  |
| chr3R | 13802970 | 13803825 | tal-2A    | 10015 | 14.6003 | 3.81  |
| chr3R | 13802970 | 13803825 | tal-1A    | 10015 | 14.6003 | 3.81  |
| chr3R | 13802970 | 13803825 | tal-AA    | 10015 | 14.6003 | 3.81  |
| chr3R | 13802970 | 13803825 | tal-3A    | 10015 | 14.6003 | 3.81  |
| chr3R | 13804330 | 13805419 | tal-2A    | 7905  | 26.5212 | 5.17  |
| chr3R | 13804330 | 13805419 | tal-1A    | 7905  | 26.5212 | 5.17  |
| chr3R | 13804330 | 13805419 | tal-AA    | 7905  | 26.5212 | 5.17  |

|       |          |          |          |       |         |       |
|-------|----------|----------|----------|-------|---------|-------|
| chr3R | 13804330 | 13805419 | tal-3A   | 7905  | 26.5212 | 5.17  |
| chr3R | 13806108 | 13806542 | tal-2A   | 6718  | 8.6007  | 3.11  |
| chr3R | 13806108 | 13806542 | tal-1A   | 6718  | 8.6007  | 3.11  |
| chr3R | 13806108 | 13806542 | tal-AA   | 6718  | 8.6007  | 3.11  |
| chr3R | 13806108 | 13806542 | tal-3A   | 6718  | 8.6007  | 3.11  |
| chr3R | 13812534 | 13813363 | tal-2A   | 172   | 316.742 | 46.68 |
| chr3R | 13812534 | 13813363 | tal-1A   | 172   | 316.742 | 46.68 |
| chr3R | 13812534 | 13813363 | tal-AA   | 172   | 316.742 | 46.68 |
| chr3R | 13812534 | 13813363 | tal-3A   | 172   | 316.742 | 46.68 |
| chr3R | 13814381 | 13815608 | CR43641  | 58    | 316.742 | 46.14 |
| chr3R | 13831280 | 13832262 | Mst87F   | 3578  | 221.565 | 17.01 |
| chr3R | 13874769 | 13875642 | E5       | 376   | 316.742 | 34.16 |
| chr3R | 13877009 | 13877662 | E5       | 2362  | 265.509 | 18.28 |
| chr3R | 13901344 | 13902082 | ems      | 98    | 300.785 | 18.99 |
| chr3R | 13904857 | 13905222 | ems      | 3178  | 23.7851 | 4.97  |
| chr3R | 13958626 | 13958944 | lpp      | 18    | 24.0577 | 4.61  |
| chr3R | 13975995 | 13976650 | rdx      | 4499  | 316.742 | 20.39 |
| chr3R | 13983081 | 13984198 | rdx      | 501   | 316.742 | 26.25 |
| chr3R | 14011094 | 14011589 | rdx      | 14691 | 11.3812 | 3.20  |
| chr3R | 14014568 | 14014951 | rdx      | 11192 | 36.7406 | 6.03  |
| chr3R | 14017476 | 14018784 | rdx      | 8120  | 316.742 | 46.70 |
| chr3R | 14020434 | 14021258 | rdx      | 5061  | 316.742 | 27.37 |
| chr3R | 14024058 | 14026966 | rdx      | 945   | 230.972 | 13.86 |
| chr3R | 14027403 | 14027668 | rdx      | 1642  | 13.8687 | 3.45  |
| chr3R | 14028877 | 14029303 | Cyp6d5   | 67    | 22.9491 | 4.41  |
| chr3R | 14031638 | 14032884 | rdx      | 132   | 22.382  | 3.81  |
| chr3R | 14031638 | 14032884 | CG3061   | 445   | 22.382  | 3.81  |
| chr3R | 14050634 | 14053777 | foxo     | 4276  | 181.16  | 12.37 |
| chr3R | 14055804 | 14058028 | foxo     | 280   | 316.742 | 27.89 |
| chr3R | 14059658 | 14060285 | foxo     | 2070  | 102.312 | 10.88 |
| chr3R | 14061296 | 14062647 | foxo     | 3829  | 32.5695 | 5.34  |
| chr3R | 14064588 | 14064948 | foxo     | 6861  | 22.9585 | 4.47  |
| chr3R | 14088591 | 14089495 | Npc2b    | 445   | 14.9456 | 3.62  |
| chr3R | 14090653 | 14090964 | Npc2b    | 48    | 22.9574 | 4.36  |
| chr3R | 14098623 | 14098939 | CG9920   | 690   | 25.328  | 4.35  |
| chr3R | 14100315 | 14101025 | PK1-R    | 2164  | 245.71  | 17.51 |
| chr3R | 14102945 | 14103274 | PK1-R    | 31    | 20.8328 | 4.84  |
| chr3R | 14108260 | 14108842 | CG12402  | 234   | 115.162 | 11.29 |
| chr3R | 14140923 | 14141324 | CG14356  | 9054  | 64.1906 | 8.99  |
| chr3R | 14170528 | 14170786 | CG3199   | 7898  | 8.16286 | 2.90  |
| chr3R | 14214634 | 14215181 | Dop1R1   | 132   | 74.2808 | 8.51  |
| chr3R | 14216895 | 14218088 | CG9649   | 5     | 66.0618 | 7.41  |
| chr3R | 14219919 | 14220525 | CG31326  | 88    | 247.194 | 20.59 |
| chr3R | 14223912 | 14224372 | Sp212    | 64    | 36.1251 | 5.56  |
| chr3R | 14226467 | 14227081 | CG9631   | 45    | 234.467 | 15.89 |
| chr3R | 14277555 | 14279678 | trx      | 8047  | 316.742 | 21.70 |
| chr3R | 14280036 | 14280326 | trx      | 6714  | 10.3178 | 2.98  |
| chr3R | 14282473 | 14287025 | trx      | 387   | 316.742 | 34.83 |
| chr3R | 14288881 | 14289533 | CG12207  | 70    | 205.899 | 14.70 |
| chr3R | 14298062 | 14298649 | CG12207  | 55    | 97.3296 | 9.19  |
| chr3R | 14307987 | 14308425 | su(Hw)   | 448   | 19.1502 | 3.45  |
| chr3R | 14316000 | 14316605 | Set8     | 3     | 171.357 | 11.20 |
| chr3R | 14326346 | 14326736 | Afti     | 78    | 10.6118 | 2.74  |
| chr3R | 14342315 | 14342591 | spn-B    | 14310 | 7.69742 | 2.82  |
| chr3R | 14346728 | 14347427 | HEATR2   | 14759 | 198.264 | 13.21 |
| chr3R | 14363210 | 14363576 | HEATR2   | 1606  | 13.8618 | 3.49  |
| chr3R | 14364019 | 14364401 | HEATR2   | 2399  | 13.9547 | 3.15  |
| chr3R | 14365033 | 14365516 | HEATR2   | 3298  | 10.0569 | 3.04  |
| chr3R | 14369716 | 14370668 | NK7.1    | 275   | 257.382 | 16.07 |
| chr3R | 14372821 | 14374011 | NK7.1    | 720   | 301.046 | 16.05 |
| chr3R | 14382049 | 14383254 | soti     | 846   | 316.742 | 25.15 |
| chr3R | 14391008 | 14391600 | mir-2281 | 5059  | 73.9437 | 7.34  |
| chr3R | 14478756 | 14479251 | cv-c     | 2683  | 129.234 | 13.85 |
| chr3R | 14481521 | 14482058 | cv-c     | 172   | 21.913  | 4.57  |
| chr3R | 14557776 | 14558826 | Pde6     | 110   | 301.181 | 17.58 |
| chr3R | 14567202 | 14567712 | CG31313  | 46    | 108.626 | 9.31  |
| chr3R | 14568180 | 14569888 | CG8066   | 802   | 218.967 | 13.20 |
| chr3R | 14568180 | 14569888 | CR44095  | 688   | 218.967 | 13.20 |
| chr3R | 14568180 | 14569888 | Cys      | 5     | 218.967 | 13.20 |
| chr3R | 14574705 | 14576028 | CG7987   | 904   | 121.21  | 12.17 |
| chr3R | 14608709 | 14609815 | CG14853  | 553   | 108.023 | 12.01 |
| chr3R | 14624216 | 14624811 | put      | 1160  | 305.245 | 21.19 |
| chr3R | 14625143 | 14626130 | put      | 31    | 10.5364 | 2.67  |
| chr3R | 14625143 | 14626130 | His4r    | 20    | 10.5364 | 2.67  |
| chr3R | 14630082 | 14630633 | Cad88C   | 125   | 117.429 | 13.26 |

|       |          |          |               |       |         |       |
|-------|----------|----------|---------------|-------|---------|-------|
| chr3R | 14649238 | 14650510 | I(3)L1231     | 5517  | 47.114  | 5.08  |
| chr3R | 14652344 | 14652819 | I(3)L1231     | 2606  | 60.9484 | 7.30  |
| chr3R | 14653086 | 14653551 | I(3)L1231     | 1919  | 38.7035 | 5.73  |
| chr3R | 14654446 | 14655787 | I(3)L1231     | 75    | 151.382 | 9.98  |
| chr3R | 14656170 | 14656540 | I(3)L1231     | 648   | 16.1275 | 3.27  |
| chr3R | 14657215 | 14657865 | CG3505        | 31    | 101.273 | 9.66  |
| chr3R | 14659416 | 14659733 | Hexim         | 146   | 11.3043 | 2.72  |
| chr3R | 14696735 | 14697466 | Meltrin       | 277   | 316.742 | 25.20 |
| chr3R | 14711386 | 14712199 | kibra         | 12320 | 51.8059 | 7.23  |
| chr3R | 14714108 | 14715230 | kibra         | 9773  | 216.6   | 19.24 |
| chr3R | 14722090 | 14722982 | kibra         | 1822  | 316.742 | 28.98 |
| chr3R | 14723563 | 14724446 | kibra         | 384   | 316.742 | 26.25 |
| chr3R | 14728990 | 14729260 | CG7530        | 35    | 16.9722 | 3.98  |
| chr3R | 14730556 | 14731831 | CG7530        | 60    | 196.662 | 12.40 |
| chr3R | 14734768 | 14735049 | CG7530        | 3422  | 25.0324 | 4.94  |
| chr3R | 14737967 | 14738341 | eff           | 2653  | 20.2289 | 4.29  |
| chr3R | 14738628 | 14741116 | eff           | 1505  | 251.076 | 14.33 |
| chr3R | 14741467 | 14742155 | jvl           | 70    | 9.55401 | 2.78  |
| chr3R | 14743502 | 14743773 | jvl           | 2048  | 16.8476 | 3.90  |
| chr3R | 14747832 | 14748251 | smp-30        | 634   | 22.1347 | 4.49  |
| chr3R | 14748774 | 14749838 | smp-30        | 488   | 316.742 | 31.64 |
| chr3R | 14748774 | 14749838 | jvl           | 87    | 316.742 | 31.64 |
| chr3R | 14776597 | 14776922 | jvl           | 11189 | 24.31   | 4.93  |
| chr3R | 14796051 | 14796499 | CG14855       | 37    | 92.9285 | 12.42 |
| chr3R | 14817671 | 14818677 | btsz          | 92    | 316.742 | 37.11 |
| chr3R | 14819784 | 14820131 | btsz          | 1174  | 26.7672 | 5.30  |
| chr3R | 14844384 | 14844733 | CG3610        | 447   | 24.5085 | 5.37  |
| chr3R | 14853653 | 14854406 | btsz          | 106   | 316.742 | 32.02 |
| chr3R | 14873243 | 14873680 | btsz          | 73    | 20.8219 | 4.76  |
| chr3R | 14875419 | 14876314 | btsz          | 602   | 87.5447 | 11.26 |
| chr3R | 14986089 | 14986552 | CR45599       | 18630 | 115.652 | 12.40 |
| chr3R | 15077003 | 15077610 | dpr9          | 93    | 73.8896 | 8.91  |
| chr3R | 15092727 | 15093028 | CG6966        | 2769  | 28.8594 | 5.00  |
| chr3R | 15093816 | 15095911 | CG6966        | 942   | 164.05  | 11.04 |
| chr3R | 15128634 | 15128931 | mir-2493      | 2073  | 22.1018 | 4.98  |
| chr3R | 15130676 | 15132096 | mir-2493      | 975   | 256.743 | 13.37 |
| chr3R | 15130676 | 15132096 | CG42788       | 92    | 256.743 | 13.37 |
| chr3R | 15146726 | 15147833 | GlyS          | 10    | 130.872 | 10.60 |
| chr3R | 15149950 | 15150354 | Gyc88E        | 306   | 10.9947 | 3.41  |
| chr3R | 15166639 | 15166944 | Mf            | 12669 | 22.3717 | 4.06  |
| chr3R | 15196460 | 15196867 | CG42542       | 39    | 14.0871 | 3.36  |
| chr3R | 15206220 | 15206575 | Spn88Ea       | 28    | 41.9016 | 5.44  |
| chr3R | 15242411 | 15243987 | Hsc70-4       | 434   | 61.0323 | 6.76  |
| chr3R | 15250196 | 15250878 | CG42404       | 410   | 54.9599 | 7.11  |
| chr3R | 15285953 | 15287105 | Tm1           | 206   | 137.923 | 13.96 |
| chr3R | 15287745 | 15288136 | Tm1           | 80    | 27.0657 | 4.53  |
| chr3R | 15289883 | 15292244 | CG45218       | 951   | 316.742 | 26.20 |
| chr3R | 15289883 | 15292244 | Tm1           | 805   | 316.742 | 26.20 |
| chr3R | 15293207 | 15293614 | Tm1           | 2430  | 31.3519 | 5.54  |
| chr3R | 15328575 | 15329136 | ea            | 38    | 49.182  | 6.85  |
| chr3R | 15342506 | 15343207 | CG6218        | 314   | 101.402 | 9.35  |
| chr3R | 15345192 | 15345798 | Surf4         | 631   | 52.9671 | 6.72  |
| chr3R | 15357129 | 15357410 | CG5044        | 39    | 17.8002 | 4.10  |
| chr3R | 15371950 | 15372551 | Ccm3          | 297   | 100.732 | 10.41 |
| chr3R | 15371950 | 15372551 | CG6136        | 41    | 100.732 | 10.41 |
| chr3R | 15374379 | 15374865 | Rbp           | 10    | 69.997  | 8.62  |
| chr3R | 15375222 | 15376000 | Rbp           | 911   | 15.7831 | 3.90  |
| chr3R | 15378971 | 15379495 | h-cup         | 3735  | 34.7685 | 5.89  |
| chr3R | 15401411 | 15401870 | CR46058       | 1421  | 34.369  | 4.84  |
| chr3R | 15408524 | 15409543 | Atx2          | 541   | 35.8167 | 5.57  |
| chr3R | 15419088 | 15419678 | CR45911       | 1002  | 55.9527 | 8.11  |
| chr3R | 15420260 | 15420978 | CR45911       | 2     | 162.693 | 14.13 |
| chr3R | 15476101 | 15476737 | AdamTS-A      | 313   | 138.11  | 14.98 |
| chr3R | 15536916 | 15537685 | AOX1          | 77    | 316.742 | 31.48 |
| chr3R | 15547333 | 15548467 | AOX3          | 87    | 114.661 | 10.53 |
| chr3R | 15664664 | 15665201 | pxb           | 1240  | 97.4174 | 8.41  |
| chr3R | 15665832 | 15666400 | pxb           | 117   | 118.445 | 13.18 |
| chr3R | 15793366 | 15794743 | nsl1          | 756   | 111.471 | 10.00 |
| chr3R | 15804097 | 15804441 | alpha-Man-IIb | 9     | 18.0383 | 3.46  |
| chr3R | 15810481 | 15810835 | alpha-Man-IIb | 31    | 14.7623 | 4.11  |
| chr3R | 15875547 | 15875915 | CG31183       | 189   | 14.1844 | 3.22  |
| chr3R | 15897899 | 15898988 | CG14877       | 2689  | 215.201 | 18.25 |
| chr3R | 15899423 | 15900075 | glob1         | 1402  | 10.903  | 3.06  |
| chr3R | 15900961 | 15901657 | glob1         | 36    | 316.742 | 40.44 |
| chr3R | 15908310 | 15908593 | CG3303        | 30    | 47.6938 | 8.14  |

|       |          |          |           |       |         |       |
|-------|----------|----------|-----------|-------|---------|-------|
| chr3R | 15919744 | 15921591 | Fbxl7     | 21    | 316.742 | 29.28 |
| chr3R | 15923466 | 15923900 | CR46028   | 485   | 46.8806 | 7.41  |
| chr3R | 15935141 | 15936250 | Sap47     | 918   | 103.293 | 10.05 |
| chr3R | 15937670 | 15938229 | Sap47     | 2806  | 71.8668 | 8.85  |
| chr3R | 15973068 | 15974795 | Hel89B    | 471   | 316.742 | 27.61 |
| chr3R | 15993122 | 15993605 | srp       | 770   | 72.6947 | 9.20  |
| chr3R | 16025588 | 16026353 | pnr       | 182   | 316.742 | 28.77 |
| chr3R | 16050788 | 16051754 | mmps      | 666   | 153.202 | 12.92 |
| chr3R | 16071915 | 16072521 | Mhcl      | 224   | 111.58  | 11.35 |
| chr3R | 16093906 | 16094271 | Mhcl      | 36    | 11.9227 | 3.47  |
| chr3R | 16094657 | 16095160 | Mhcl      | 917   | 6.42196 | 2.32  |
| chr3R | 16097565 | 16098813 | Mhcl      | 416   | 44.1942 | 5.60  |
| chr3R | 16099118 | 16100221 | Akt1      | 681   | 85.5537 | 8.41  |
| chr3R | 16128398 | 16128911 | Sb        | 61    | 170.34  | 15.76 |
| chr3R | 16155710 | 16156086 | CG6006    | 879   | 8.50861 | 2.78  |
| chr3R | 16157756 | 16158387 | CG6006    | 122   | 252.849 | 17.03 |
| chr3R | 16171770 | 16172129 | CG8925    | 31    | 43.5497 | 6.84  |
| chr3R | 16186781 | 16187606 | Bin1      | 149   | 44.7083 | 5.27  |
| chr3R | 16186781 | 16187606 | sra       | 48    | 44.7083 | 5.27  |
| chr3R | 16201384 | 16201724 | CG6126    | 1473  | 18.1679 | 4.06  |
| chr3R | 16202805 | 16203425 | CG6126    | 44    | 316.742 | 23.55 |
| chr3R | 16202805 | 16203425 | CG31287   | 243   | 316.742 | 23.55 |
| chr3R | 16205347 | 16205755 | mtSSB     | 294   | 46.0052 | 5.20  |
| chr3R | 16207132 | 16207462 | CR45640   | 1269  | 10.9759 | 3.35  |
| chr3R | 16212623 | 16213901 | CR45642   | 78    | 70.5646 | 9.82  |
| chr3R | 16214236 | 16214506 | CR45641   | 26    | 7.45565 | 2.76  |
| chr3R | 16218100 | 16218541 | CR45641   | 3847  | 20.3383 | 4.65  |
| chr3R | 16221237 | 16221823 | CR45643   | 1883  | 24.5402 | 4.77  |
| chr3R | 16222259 | 16222753 | CR45643   | 872   | 26.5466 | 4.39  |
| chr3R | 16224126 | 16225134 | tara      | 910   | 316.742 | 28.92 |
| chr3R | 16225663 | 16226137 | tara      | 251   | 19.7279 | 3.94  |
| chr3R | 16228910 | 16229339 | tara      | 3487  | 17.5784 | 4.05  |
| chr3R | 16231455 | 16232008 | tara      | 5986  | 12.7744 | 3.23  |
| chr3R | 16235073 | 16237854 | tara      | 6207  | 316.742 | 18.37 |
| chr3R | 16239488 | 16240173 | tara      | 2909  | 24.3346 | 4.06  |
| chr3R | 16240513 | 16241760 | tara      | 1566  | 316.742 | 22.41 |
| chr3R | 16242181 | 16243115 | tara      | 190   | 316.742 | 33.33 |
| chr3R | 16244514 | 16245115 | tara      | 2063  | 103.832 | 10.31 |
| chr3R | 16247017 | 16248921 | tara      | 5208  | 82.3264 | 8.74  |
| chr3R | 16249519 | 16250991 | tara      | 7426  | 316.742 | 25.25 |
| chr3R | 16253095 | 16253469 | tara      | 10448 | 22.8209 | 4.56  |
| chr3R | 16253812 | 16255341 | bor       | 9931  | 36.371  | 5.54  |
| chr3R | 16272077 | 16272452 | Mat89Ba   | 148   | 10.6058 | 2.86  |
| chr3R | 16272077 | 16272452 | gish      | 184   | 10.6058 | 2.86  |
| chr3R | 16272928 | 16273887 | gish      | 500   | 162.41  | 11.68 |
| chr3R | 16274620 | 16274997 | gish      | 1786  | 49.7546 | 6.72  |
| chr3R | 16279928 | 16282411 | gish      | 483   | 316.742 | 23.00 |
| chr3R | 16284863 | 16285417 | gish      | 4166  | 105.374 | 9.66  |
| chr3R | 16305234 | 16306262 | Zip89B    | 76    | 316.742 | 23.75 |
| chr3R | 16338305 | 16338725 | Sulf1     | 42    | 33.8429 | 5.24  |
| chr3R | 16341647 | 16342075 | SF2       | 93    | 24.0155 | 4.23  |
| chr3R | 16349107 | 16349432 | CG14879   | 5     | 17.6046 | 3.74  |
| chr3R | 16349107 | 16349432 | Manf      | 172   | 17.6046 | 3.74  |
| chr3R | 16355380 | 16355737 | CG10311   | 1459  | 32.3618 | 5.12  |
| chr3R | 16356105 | 16357374 | CG10311   | 22    | 316.742 | 18.51 |
| chr3R | 16403371 | 16404176 | ss        | 0     | 81.2025 | 8.82  |
| chr3R | 16431697 | 16431955 | CG31279   | 330   | 20.0832 | 3.86  |
| chr3R | 16449115 | 16449875 | Pak3      | 4163  | 38.45   | 6.45  |
| chr3R | 16452764 | 16453969 | Pak3      | 711   | 316.742 | 23.00 |
| chr3R | 16592566 | 16592922 | CG14892   | 1611  | 22.276  | 4.58  |
| chr3R | 16604683 | 16604997 | CG10345   | 16    | 19.0509 | 4.37  |
| chr3R | 16625144 | 16626259 | Fas1      | 42    | 41.5832 | 5.01  |
| chr3R | 16647644 | 16648284 | Cctgamma  | 396   | 52.0108 | 6.50  |
| chr3R | 16655082 | 16656030 | modSP     | 338   | 151.74  | 11.95 |
| chr3R | 16702575 | 16703438 | Ubx       | 31412 | 316.742 | 43.70 |
| chr3R | 16719732 | 16720337 | Ubx       | 14432 | 203.687 | 18.01 |
| chr3R | 16734359 | 16734776 | Ubx       | 104   | 68.2663 | 8.32  |
| chr3R | 16763462 | 16764559 | bxd       | 8973  | 316.742 | 21.88 |
| chr3R | 16798547 | 16798966 | CR45750   | 1810  | 9.09143 | 2.55  |
| chr3R | 16811718 | 16812254 | CR45751   | 10689 | 103.301 | 13.31 |
| chr3R | 16829978 | 16830511 | abd-A     | 204   | 220.208 | 17.69 |
| chr3R | 16847120 | 16847692 | iab-8     | 1282  | 148.19  | 14.19 |
| chr3R | 16857555 | 16857991 | mir-iab-8 | 1447  | 42.9912 | 7.65  |
| chr3R | 16869223 | 16869807 | mir-iab-8 | 13155 | 209.241 | 14.36 |
| chr3R | 16882360 | 16882905 | iab-8     | 9347  | 63.7911 | 8.59  |



|       |          |          |          |       |         |       |
|-------|----------|----------|----------|-------|---------|-------|
| chr3R | 16898792 | 16900184 | iab-8    | 628   | 266.354 | 18.89 |
| chr3R | 16919016 | 16919367 | iab-8    | 3954  | 28.4374 | 4.64  |
| chr3R | 16920389 | 16920772 | iab-8    | 2521  | 33.6275 | 6.36  |
| chr3R | 16934225 | 16935016 | Abd-B    | 265   | 82.7846 | 11.36 |
| chr3R | 16948509 | 16949088 | CR46267  | 3129  | 224.04  | 19.48 |
| chr3R | 16957794 | 16958773 | Abd-B    | 2304  | 58.6334 | 8.54  |
| chr3R | 16969394 | 16970341 | Abd-B    | 1077  | 58.988  | 6.20  |
| chr3R | 16981758 | 16982529 | Ahcy89E  | 46    | 76.8462 | 9.12  |
| chr3R | 16986251 | 16986775 | CG18622  | 332   | 16.7267 | 3.87  |
| chr3R | 16987427 | 16988147 | CG18622  | 62    | 316.742 | 22.50 |
| chr3R | 16996368 | 16996700 | CG3534   | 72    | 25.4096 | 4.63  |
| chr3R | 17002517 | 17003185 | Irc      | 22    | 119.696 | 9.74  |
| chr3R | 17020732 | 17021202 | AdSL     | 84    | 37.6147 | 5.43  |
| chr3R | 17053427 | 17054881 | Dad      | 46    | 316.742 | 26.43 |
| chr3R | 17055969 | 17057061 | Dad      | 1572  | 316.742 | 20.34 |
| chr3R | 17059004 | 17060167 | Dad      | 4469  | 73.3219 | 7.88  |
| chr3R | 17064723 | 17065879 | Ns1      | 7203  | 316.742 | 38.67 |
| chr3R | 17067668 | 17068165 | Ns1      | 4773  | 35.0921 | 5.39  |
| chr3R | 17077782 | 17078396 | Keap1    | 1     | 127.73  | 12.80 |
| chr3R | 17079187 | 17080261 | Keap1    | 528   | 33.1458 | 5.07  |
| chr3R | 17079187 | 17080261 | kuk      | 826   | 33.1458 | 5.07  |
| chr3R | 17081035 | 17081573 | kuk      | 563   | 11.8142 | 3.01  |
| chr3R | 17082407 | 17082784 | kuk      | 272   | 11.9329 | 3.23  |
| chr3R | 17116425 | 17116700 | cher     | 2579  | 9.90867 | 3.05  |
| chr3R | 17118896 | 17119406 | cher     | 81    | 316.742 | 19.73 |
| chr3R | 17149090 | 17149388 | m-cup    | 195   | 16.6617 | 3.81  |
| chr3R | 17151740 | 17152093 | CG5292   | 16    | 13.8647 | 3.36  |
| chr3R | 17264967 | 17265333 | beat-llb | 126   | 37.5351 | 7.05  |
| chr3R | 17264967 | 17265333 | CG44257  | 102   | 37.5351 | 7.05  |
| chr3R | 17366020 | 17366502 | beat-lla | 124   | 50.8072 | 7.41  |
| chr3R | 17377565 | 17377949 | lute     | 2204  | 37.8189 | 6.50  |
| chr3R | 17386007 | 17386514 | lute     | 395   | 28.0014 | 4.85  |
| chr3R | 17394313 | 17395157 | CREG     | 30    | 21.1336 | 4.19  |
| chr3R | 17402392 | 17402786 | Sur-8    | 118   | 36.3954 | 5.89  |
| chr3R | 17505577 | 17506173 | Dscam3   | 272   | 64.4822 | 9.17  |
| chr3R | 17534462 | 17534756 | CG5823   | 28    | 26.9717 | 4.79  |
| chr3R | 17557332 | 17558030 | Hmx      | 1193  | 171.404 | 15.28 |
| chr3R | 17558568 | 17558942 | Hmx      | 154   | 35.0684 | 6.20  |
| chr3R | 17566686 | 17567380 | Hmx      | 8079  | 96.7467 | 11.27 |
| chr3R | 17603703 | 17604180 | sll      | 2286  | 20.4094 | 4.06  |
| chr3R | 17604504 | 17605649 | sll      | 1413  | 22.0711 | 4.81  |
| chr3R | 17615847 | 17616287 | CG14327  | 2229  | 14.6441 | 3.42  |
| chr3R | 17653613 | 17654470 | CR45223  | 409   | 122.56  | 12.05 |
| chr3R | 17665940 | 17666931 | CR45045  | 1370  | 156.491 | 15.68 |
| chr3R | 17670619 | 17670875 | CG7523   | 170   | 9.40479 | 2.72  |
| chr3R | 17679302 | 17679860 | alt      | 432   | 21.0538 | 4.34  |
| chr3R | 17680331 | 17682727 | alt      | 991   | 140.216 | 11.76 |
| chr3R | 17680331 | 17682727 | CG7655   | 1416  | 140.216 | 11.76 |
| chr3R | 17699823 | 17701964 | CR46036  | 244   | 125.793 | 10.04 |
| chr3R | 17702280 | 17704890 | CR46035  | 364   | 94.7138 | 8.21  |
| chr3R | 17706753 | 17707259 | CR46035  | 3245  | 19.2889 | 4.06  |
| chr3R | 17711418 | 17711756 | osa      | 6807  | 13.9734 | 3.79  |
| chr3R | 17712635 | 17713463 | osa      | 5231  | 36.501  | 5.69  |
| chr3R | 17716835 | 17718608 | osa      | 1092  | 316.742 | 39.92 |
| chr3R | 17738069 | 17738417 | TyrRII   | 706   | 16.6683 | 4.45  |
| chr3R | 17738995 | 17739396 | TyrRII   | 260   | 75.2    | 10.83 |
| chr3R | 17774845 | 17777561 | CG43102  | 107   | 120.056 | 14.24 |
| chr3R | 17798126 | 17798390 | CG7379   | 26    | 15.2794 | 3.54  |
| chr3R | 17897859 | 17898175 | CG12347  | 8398  | 9.87475 | 3.19  |
| chr3R | 17900876 | 17901651 | CG12347  | 5401  | 44.1544 | 7.05  |
| chr3R | 17902211 | 17902665 | CG12347  | 4063  | 50.5792 | 8.44  |
| chr3R | 17911933 | 17912366 | CG43445  | 768   | 47.0028 | 6.34  |
| chr3R | 17915190 | 17915573 | Rim      | 1181  | 76.6935 | 9.73  |
| chr3R | 17915853 | 17916995 | Rim      | 141   | 68.5549 | 9.29  |
| chr3R | 17919091 | 17920682 | cpo      | 653   | 85.0551 | 11.72 |
| chr3R | 17943545 | 17944412 | cpo      | 177   | 316.742 | 42.67 |
| chr3R | 17948835 | 17950773 | cpo      | 5238  | 71.0781 | 7.93  |
| chr3R | 17964112 | 17964710 | cpo      | 20442 | 28.4184 | 5.19  |
| chr3R | 18017334 | 18017650 | DNasell  | 1835  | 45.6556 | 6.89  |
| chr3R | 18021208 | 18021495 | CG7785   | 273   | 19.9971 | 3.94  |
| chr3R | 18063232 | 18063614 | htl      | 10387 | 45.7966 | 7.95  |
| chr3R | 18089115 | 18089804 | sr       | 1315  | 149.043 | 12.23 |
| chr3R | 18111555 | 18112120 | sr       | 10266 | 76.5914 | 9.94  |
| chr3R | 18118318 | 18118681 | sr       | 3523  | 18.9331 | 4.27  |
| chr3R | 18121276 | 18122276 | sr       | 138   | 316.742 | 19.87 |

|       |          |          |               |      |         |       |
|-------|----------|----------|---------------|------|---------|-------|
| chr3R | 18160274 | 18160741 | CR45104       | 617  | 34.9032 | 6.08  |
| chr3R | 18166044 | 18166811 | Prx5          | 29   | 67.2226 | 8.51  |
| chr3R | 18167625 | 18170429 | PP2A-B'       | 70   | 316.742 | 37.86 |
| chr3R | 18171990 | 18172989 | PP2A-B'       | 552  | 140.019 | 12.96 |
| chr3R | 18196701 | 18199895 | Ssdp          | 704  | 316.742 | 41.91 |
| chr3R | 18196701 | 18199895 | CG7985        | 965  | 316.742 | 41.91 |
| chr3R | 18200180 | 18200450 | CG7985        | 30   | 10.2268 | 2.60  |
| chr3R | 18226064 | 18227154 | CG7168        | 893  | 44.4467 | 7.11  |
| chr3R | 18226064 | 18227154 | Mdh2          | 580  | 44.4467 | 7.11  |
| chr3R | 18242528 | 18245476 | 14-3-3epsilon | 2004 | 316.742 | 32.88 |
| chr3R | 18245818 | 18246428 | 14-3-3epsilon | 3564 | 34.6304 | 5.37  |
| chr3R | 18265103 | 18265667 | CG18599       | 2328 | 28.2806 | 5.30  |
| chr3R | 18274677 | 18275551 | eIF-1A        | 487  | 316.742 | 25.89 |
| chr3R | 18298078 | 18298950 | I(3)05822     | 486  | 246.757 | 15.38 |
| chr3R | 18310295 | 18312080 | PKD           | 730  | 316.742 | 25.39 |
| chr3R | 18314181 | 18315782 | PKD           | 193  | 316.742 | 19.67 |
| chr3R | 18360493 | 18361199 | CG15803       | 153  | 111.602 | 10.55 |
| chr3R | 18360493 | 18361199 | CR45634       | 101  | 111.602 | 10.55 |
| chr3R | 18371488 | 18371766 | gl            | 1119 | 14.2996 | 4.00  |
| chr3R | 18372751 | 18373323 | CG14310       | 24   | 16.0475 | 4.37  |
| chr3R | 18379456 | 18379762 | CG7675        | 1081 | 15.535  | 3.38  |
| chr3R | 18380931 | 18381559 | CG7675        | 149  | 103.43  | 10.54 |
| chr3R | 18396700 | 18399778 | Vha100-2      | 556  | 316.742 | 33.64 |
| chr3R | 18396700 | 18399778 | Vti1b         | 490  | 316.742 | 33.64 |
| chr3R | 18396700 | 18399778 | Vha100-2      | 1685 | 316.742 | 33.64 |
| chr3R | 18396700 | 18399778 | Vti1b         | 2224 | 316.742 | 33.64 |
| chr3R | 18402509 | 18402907 | CG12333       | 11   | 43.4598 | 5.67  |
| chr3R | 18412446 | 18413023 | CG31122       | 47   | 40.1667 | 6.05  |
| chr3R | 18436520 | 18437381 | fru           | 1703 | 316.742 | 25.52 |
| chr3R | 18439230 | 18439588 | fru           | 566  | 19.7632 | 3.65  |
| chr3R | 18445098 | 18445636 | fru           | 2059 | 20.6741 | 4.27  |
| chr3R | 18447385 | 18447752 | fru           | 250  | 59.2177 | 9.27  |
| chr3R | 18480720 | 18480979 | fru           | 184  | 17.4341 | 4.57  |
| chr3R | 18481601 | 18482040 | fru           | 1193 | 18.4544 | 4.30  |
| chr3R | 18545487 | 18546097 | fru           | 58   | 19.5329 | 4.47  |
| chr3R | 18546791 | 18547312 | fru           | 1450 | 51.6407 | 8.20  |
| chr3R | 18548819 | 18549122 | fru           | 3369 | 8.08695 | 3.08  |
| chr3R | 18572927 | 18574414 | fray          | 656  | 316.742 | 34.15 |
| chr3R | 18572927 | 18574414 | CG7694        | 656  | 316.742 | 34.15 |
| chr3R | 18572927 | 18574414 | fray          | 656  | 316.742 | 34.15 |
| chr3R | 18583362 | 18584920 | CG7694        | 405  | 316.742 | 31.72 |
| chr3R | 18583362 | 18584920 | fray          | 405  | 316.742 | 31.72 |
| chr3R | 18585266 | 18585931 | fray          | 228  | 316.742 | 27.04 |
| chr3R | 18658607 | 18659406 | CG31224       | 532  | 65.4411 | 7.61  |
| chr3R | 18670884 | 18671204 | CG31230       | 644  | 22.9723 | 4.66  |
| chr3R | 18680367 | 18680736 | CG7708        | 1    | 17.444  | 4.14  |
| chr3R | 18698958 | 18699589 | CR45996       | 2042 | 30.5536 | 5.38  |
| chr3R | 18705171 | 18705662 | ChAT          | 54   | 28.2992 | 5.46  |
| chr3R | 18705171 | 18705662 | VACHT         | 54   | 28.2992 | 5.46  |
| chr3R | 18705171 | 18705662 | ChAT          | 54   | 28.2992 | 5.46  |
| chr3R | 18739153 | 18740726 | Mekk1         | 75   | 316.742 | 20.09 |
| chr3R | 18741133 | 18741700 | Mekk1         | 1296 | 101.556 | 9.14  |
| chr3R | 18742525 | 18743770 | Mekk1         | 742  | 316.742 | 33.34 |
| chr3R | 18798069 | 18798499 | CG7720        | 3133 | 44.6278 | 7.25  |
| chr3R | 18849080 | 18849659 | CG18208       | 184  | 151.896 | 13.36 |
| chr3R | 18906539 | 18907122 | EndoA         | 248  | 36.7603 | 5.88  |
| chr3R | 18912689 | 18913264 | CG14291       | 63   | 260.939 | 22.05 |
| chr3R | 18913781 | 18914257 | Xrp1          | 930  | 233.602 | 17.45 |
| chr3R | 18914580 | 18915186 | Xrp1          | 96   | 138.011 | 12.43 |
| chr3R | 18916747 | 18917334 | Xrp1          | 1153 | 129.917 | 10.32 |
| chr3R | 18917855 | 18919278 | Xrp1          | 74   | 151.507 | 10.65 |
| chr3R | 18922928 | 18924709 | Xrp1          | 680  | 316.742 | 18.84 |
| chr3R | 18929085 | 18929787 | CG42613       | 212  | 73.6634 | 9.38  |
| chr3R | 18931411 | 18932147 | CG42613       | 2714 | 74.5581 | 10.28 |
| chr3R | 18935082 | 18935687 | CG42613       | 6144 | 59.7648 | 8.44  |
| chr3R | 18949103 | 18949459 | CG43732       | 917  | 31.6752 | 5.76  |
| chr3R | 18949103 | 18949459 | CG42613       | 917  | 31.6752 | 5.76  |
| chr3R | 18949103 | 18949459 | CG43732       | 917  | 31.6752 | 5.76  |
| chr3R | 18949997 | 18950373 | CG43732       | 17   | 40.2102 | 7.34  |
| chr3R | 18949997 | 18950373 | CG42613       | 17   | 40.2102 | 7.34  |
| chr3R | 18949997 | 18950373 | CG43732       | 17   | 40.2102 | 7.34  |
| chr3R | 18983834 | 18984142 | gukh          | 85   | 9.64745 | 2.65  |
| chr3R | 19017391 | 19018279 | CG6005        | 6157 | 95.0569 | 10.96 |
| chr3R | 19018681 | 19019121 | CG6005        | 5111 | 26.2963 | 5.62  |
| chr3R | 19023953 | 19024273 | CG6005        | 74   | 21.1815 | 4.00  |

|       |          |          |            |       |         |       |
|-------|----------|----------|------------|-------|---------|-------|
| chr3R | 19023953 | 19024273 | CG14286    | 13    | 21.1815 | 4.00  |
| chr3R | 19057523 | 19057827 | CR46041    | 333   | 13.8097 | 3.53  |
| chr3R | 19073043 | 19073492 | CR46041    | 15076 | 10.6247 | 3.32  |
| chr3R | 19093603 | 19094400 | cdi        | 42    | 27.3219 | 4.37  |
| chr3R | 19096507 | 19097194 | CG6040     | 165   | 316.742 | 22.73 |
| chr3R | 19111090 | 19111643 | CG6040     | 14533 | 18.8413 | 4.45  |
| chr3R | 19134861 | 19135512 | Cyp12a4    | 30    | 300.792 | 21.21 |
| chr3R | 19147302 | 19147991 | Ppcs       | 288   | 316.742 | 27.22 |
| chr3R | 19148762 | 19149098 | CR44107    | 197   | 15.1049 | 3.65  |
| chr3R | 19153455 | 19153849 | CG5835     | 25    | 53.8245 | 7.51  |
| chr3R | 19162049 | 19162332 | Nsun5      | 113   | 11.0211 | 2.81  |
| chr3R | 19162049 | 19162332 | CG42359    | 113   | 11.0211 | 2.81  |
| chr3R | 19163818 | 19165105 | sqz        | 89    | 316.742 | 24.23 |
| chr3R | 19165516 | 19166164 | sqz        | 1618  | 316.742 | 26.10 |
| chr3R | 19211311 | 19213408 | cry        | 16    | 236.548 | 13.60 |
| chr3R | 19225276 | 19226763 | vib        | 693   | 316.742 | 26.70 |
| chr3R | 19321255 | 19322559 | DI         | 4127  | 316.742 | 42.29 |
| chr3R | 19325971 | 19326786 | DI         | 60    | 197.036 | 14.95 |
| chr3R | 19411424 | 19411788 | CG31221    | 1103  | 34.2762 | 6.51  |
| chr3R | 19412321 | 19412798 | CG31221    | 117   | 53.7324 | 7.15  |
| chr3R | 19460480 | 19461361 | Dys        | 408   | 103.179 | 11.99 |
| chr3R | 19463189 | 19464535 | Dys        | 103   | 316.742 | 21.85 |
| chr3R | 19465589 | 19466017 | Dys        | 2283  | 72.0504 | 9.52  |
| chr3R | 19476645 | 19476905 | Dys        | 50    | 18.2248 | 4.31  |
| chr3R | 19495100 | 19495682 | CG15025    | 4266  | 98.1772 | 10.01 |
| chr3R | 19498647 | 19500088 | Dys        | 4287  | 112.705 | 10.71 |
| chr3R | 19503205 | 19503747 | Dys        | 356   | 62.5419 | 8.89  |
| chr3R | 19508770 | 19509361 | Dys        | 266   | 110.015 | 13.06 |
| chr3R | 19568762 | 19569370 | Dys        | 128   | 177.814 | 13.35 |
| chr3R | 19620934 | 19621447 | CG6231     | 27    | 29.9813 | 5.74  |
| chr3R | 19623288 | 19623880 | CG6231     | 109   | 126.609 | 13.10 |
| chr3R | 19624243 | 19624924 | CG6231     | 46    | 205.589 | 17.08 |
| chr3R | 19627501 | 19627785 | CG6231     | 9     | 6.59139 | 2.57  |
| chr3R | 19628042 | 19628442 | CG6231     | 477   | 63.0083 | 8.34  |
| chr3R | 19632559 | 19633139 | CG6231     | 103   | 123.852 | 12.62 |
| chr3R | 19640924 | 19641650 | subdued    | 25    | 316.742 | 20.56 |
| chr3R | 19641997 | 19642817 | subdued    | 240   | 84.0584 | 8.58  |
| chr3R | 19643968 | 19644586 | Vha13      | 78    | 52.3017 | 5.74  |
| chr3R | 19656448 | 19656916 | CG6184     | 239   | 89.1968 | 11.47 |
| chr3R | 19671316 | 19671795 | Naam       | 39    | 32.7609 | 4.90  |
| chr3R | 19719348 | 19719722 | CG34286    | 3610  | 45.7572 | 7.82  |
| chr3R | 19730220 | 19731716 | GluClalpha | 118   | 121.829 | 10.57 |
| chr3R | 19781063 | 19781451 | CG11407    | 103   | 13.999  | 3.79  |
| chr3R | 19786900 | 19787395 | CG11453    | 3807  | 7.85955 | 2.46  |
| chr3R | 19793666 | 19793965 | CG11453    | 10298 | 23.7601 | 5.28  |
| chr3R | 19802256 | 19802805 | CG11453    | 19085 | 130.653 | 11.44 |
| chr3R | 19836689 | 19837192 | bnl        | 120   | 149.135 | 15.78 |
| chr3R | 19859618 | 19860082 | Ire1       | 1460  | 19.8876 | 4.23  |
| chr3R | 19860683 | 19861572 | Ire1       | 223   | 292.66  | 16.70 |
| chr3R | 19863944 | 19864517 | CG4572     | 128   | 33.43   | 3.72  |
| chr3R | 19863944 | 19864517 | CG4686     | 230   | 33.43   | 3.72  |
| chr3R | 19875092 | 19875725 | CG4562     | 88    | 80.3179 | 8.06  |
| chr3R | 19889215 | 19891583 | CG4733     | 578   | 316.742 | 30.25 |
| chr3R | 19902817 | 19903534 | CG4538     | 220   | 16.0954 | 3.48  |
| chr3R | 19905052 | 19905485 | RhoGAP92B  | 6     | 20.1758 | 3.83  |
| chr3R | 20007649 | 20008686 | Hs6st      | 427   | 229.603 | 15.98 |
| chr3R | 20021608 | 20022102 | psidin     | 61    | 45.1017 | 5.91  |
| chr3R | 20035667 | 20036034 | CG10889    | 234   | 19.4026 | 4.37  |
| chr3R | 20080124 | 20080704 | Rh3        | 1996  | 66.7121 | 8.83  |
| chr3R | 20204399 | 20205003 | Nlg4       | 110   | 118.09  | 13.68 |
| chr3R | 20252547 | 20255036 | cic        | 1233  | 316.742 | 37.97 |
| chr3R | 20261181 | 20262267 | cic        | 9114  | 47.1618 | 5.97  |
| chr3R | 20283888 | 20284602 | cic        | 8959  | 35.1389 | 6.71  |
| chr3R | 20292897 | 20293313 | cic        | 94    | 64.6896 | 8.76  |
| chr3R | 20309180 | 20310872 | CG42668    | 146   | 112.068 | 8.96  |
| chr3R | 20311366 | 20311687 | CG42668    | 2178  | 15.6368 | 3.71  |
| chr3R | 20317423 | 20318542 | CG42668    | 387   | 48.9103 | 7.33  |
| chr3R | 20324452 | 20324799 | CR45800    | 883   | 24.5502 | 4.01  |
| chr3R | 20327738 | 20328095 | CG4360     | 46    | 20.6898 | 4.06  |
| chr3R | 20449594 | 20449961 | Gfrl       | 95    | 27.304  | 5.86  |
| chr3R | 20484346 | 20484901 | Gfrl       | 66    | 30.7009 | 6.18  |
| chr3R | 20546482 | 20547071 | Stat92E    | 4285  | 29.2443 | 4.15  |
| chr3R | 20549742 | 20551264 | Stat92E    | 1074  | 70.6203 | 8.18  |
| chr3R | 20555560 | 20557922 | att-ORFA   | 1422  | 129.154 | 10.87 |
| chr3R | 20564061 | 20564372 | CG10877    | 181   | 14.043  | 3.58  |

|       |          |          |                   |       |         |       |
|-------|----------|----------|-------------------|-------|---------|-------|
| chr3R | 20565318 | 20566128 | CG5191            | 39    | 245.953 | 15.10 |
| chr3R | 20574152 | 20574990 | snoRNA:Psi18S-301 | 212   | 92.0359 | 9.90  |
| chr3R | 20585461 | 20585833 | CG16953           | 65    | 12.5445 | 3.41  |
| chr3R | 20592966 | 20593697 | bon               | 239   | 62.3409 | 7.22  |
| chr3R | 20594262 | 20595170 | bon               | 1738  | 316.742 | 23.85 |
| chr3R | 20604087 | 20604386 | bon               | 11136 | 14.4803 | 3.62  |
| chr3R | 20621904 | 20622379 | H                 | 235   | 27.7919 | 4.64  |
| chr3R | 20634012 | 20634281 | Pi3K92E           | 628   | 10.0736 | 2.82  |
| chr3R | 20658684 | 20658949 | Nep4              | 802   | 13.0473 | 3.52  |
| chr3R | 20677173 | 20677477 | CG4000            | 41    | 12.5391 | 3.51  |
| chr3R | 20678100 | 20678449 | CR43452           | 130   | 17.6883 | 4.33  |
| chr3R | 20739841 | 20740387 | CG42322           | 54    | 55.0107 | 8.03  |
| chr3R | 20741368 | 20741842 | CG42322           | 1520  | 105.539 | 10.68 |
| chr3R | 20745126 | 20745590 | CG31200           | 8     | 93.2309 | 9.26  |
| chr3R | 20777988 | 20779124 | Syp               | 288   | 316.742 | 28.08 |
| chr3R | 20779444 | 20780829 | Syp               | 475   | 284.838 | 16.93 |
| chr3R | 20781533 | 20785559 | Syp               | 205   | 316.742 | 38.42 |
| chr3R | 20790375 | 20790781 | Syp               | 548   | 26.7911 | 4.53  |
| chr3R | 20821825 | 20822231 | CG17271           | 81    | 10.7923 | 2.69  |
| chr3R | 20821825 | 20822231 | RpS20             | 251   | 10.7923 | 2.69  |
| chr3R | 20829014 | 20830794 | AdSS              | 1307  | 316.742 | 24.13 |
| chr3R | 20832703 | 20833600 | Synd              | 534   | 47.7003 | 5.93  |
| chr3R | 20836942 | 20837376 | Synd              | 2658  | 13.8927 | 3.24  |
| chr3R | 20838708 | 20839396 | CG15695           | 2996  | 27.9498 | 4.84  |
| chr3R | 20866038 | 20866431 | CG3822            | 19    | 24.1886 | 4.52  |
| chr3R | 20890482 | 20891766 | CR44947           | 3107  | 70.3707 | 8.31  |
| chr3R | 20897159 | 20897660 | Ktl               | 78    | 62.577  | 7.48  |
| chr3R | 20913998 | 20914971 | hdly              | 54    | 194.764 | 15.76 |
| chr3R | 20945453 | 20945946 | CG31191           | 168   | 34.4192 | 6.07  |
| chr3R | 20948755 | 20950156 | Atpalpha          | 586   | 316.742 | 20.88 |
| chr3R | 20956727 | 20959255 | Atpalpha          | 671   | 316.742 | 32.27 |
| chr3R | 20959901 | 20960552 | Atpalpha          | 2519  | 19.6281 | 3.97  |
| chr3R | 20960968 | 20961331 | Atpalpha          | 3456  | 18.055  | 3.78  |
| chr3R | 20962806 | 20963385 | Atpalpha          | 5535  | 18.2527 | 4.07  |
| chr3R | 20977711 | 20978371 | Calx              | 70    | 76.3037 | 7.59  |
| chr3R | 21046803 | 21047106 | CG31207           | 35    | 16.4465 | 3.82  |
| chr3R | 21048541 | 21049002 | CG7079            | 49    | 25.4334 | 4.52  |
| chr3R | 21059945 | 21061061 | Mvl               | 41    | 100.762 | 10.84 |
| chr3R | 21064952 | 21066090 | AnxB9             | 9     | 255.641 | 14.81 |
| chr3R | 21090142 | 21090399 | CR44178           | 1503  | 12.9593 | 3.67  |
| chr3R | 21096579 | 21097127 | RhoGAP93B         | 968   | 29.6547 | 5.67  |
| chr3R | 21097550 | 21097859 | RhoGAP93B         | 109   | 10.4133 | 2.70  |
| chr3R | 21111378 | 21113356 | Rab11             | 1637  | 132.054 | 12.59 |
| chr3R | 21124114 | 21124589 | slmb              | 3063  | 31.0549 | 5.41  |
| chr3R | 21126740 | 21128021 | slmb              | 259   | 111.516 | 9.68  |
| chr3R | 21126740 | 21128021 | CG5793            | 1     | 111.516 | 9.68  |
| chr3R | 21141307 | 21141651 | SNF4Agamma        | 689   | 21.2771 | 4.87  |
| chr3R | 21152361 | 21153495 | SNF4Agamma        | 199   | 316.742 | 24.75 |
| chr3R | 21180527 | 21180839 | SNF4Agamma        | 124   | 30.1339 | 5.95  |
| chr3R | 21186613 | 21187887 | SNF4Agamma        | 1380  | 201.81  | 16.86 |
| chr3R | 21188383 | 21189112 | SNF4Agamma        | 151   | 278.847 | 18.03 |
| chr3R | 21195411 | 21196112 | SNF4Agamma        | 3289  | 20.9075 | 4.56  |
| chr3R | 21198681 | 21199740 | SNF4Agamma        | 49    | 82.1895 | 7.76  |
| chr3R | 21200095 | 21200985 | SNF4Agamma        | 263   | 168.264 | 12.66 |
| chr3R | 21203144 | 21205276 | SNF4Agamma        | 75    | 316.742 | 24.78 |
| chr3R | 21205824 | 21206083 | SNF4Agamma        | 1023  | 22.6016 | 4.58  |
| chr3R | 21206516 | 21207059 | SNF4Agamma        | 1688  | 114.391 | 11.82 |
| chr3R | 21223522 | 21224622 | CG3337            | 805   | 92.0359 | 9.90  |
| chr3R | 21223522 | 21224622 | Nelf-A            | 686   | 92.0359 | 9.90  |
| chr3R | 21223522 | 21224622 | CR44265           | 200   | 92.0359 | 9.90  |
| chr3R | 21237060 | 21237527 | e                 | 127   | 28.594  | 5.61  |
| chr3R | 21246629 | 21247012 | ETHR              | 178   | 19.7632 | 3.65  |
| chr3R | 21268172 | 21268438 | Rab1              | 784   | 16.9468 | 3.67  |
| chr3R | 21268924 | 21269213 | Rab1              | 26    | 16.9331 | 3.50  |
| chr3R | 21275994 | 21276529 | CG3301            | 38    | 47.4343 | 6.27  |
| chr3R | 21289048 | 21289615 | SIFaR             | 4663  | 153.964 | 16.59 |
| chr3R | 21293863 | 21294256 | SIFaR             | 54    | 22.9585 | 4.47  |
| chr3R | 21296268 | 21298239 | Hsromega          | 57    | 241.282 | 14.58 |
| chr3R | 21348475 | 21349883 | CG16791           | 9     | 316.742 | 18.95 |
| chr3R | 21376227 | 21377487 | mod(mdg4)         | 956   | 126.906 | 10.49 |
| chr3R | 21378683 | 21379118 | tin               | 116   | 64.0767 | 8.34  |
| chr3R | 21433913 | 21434780 | lbl               | 175   | 316.742 | 28.46 |
| chr3R | 21446147 | 21446902 | lbe               | 39    | 316.742 | 32.94 |
| chr3R | 21460019 | 21460285 | CR43453           | 5533  | 18.1418 | 4.67  |
| chr3R | 21480925 | 21481263 | Fancm             | 1256  | 11.3088 | 3.33  |

|       |          |          |           |       |         |       |
|-------|----------|----------|-----------|-------|---------|-------|
| chr3R | 21499149 | 21500003 | CR44032   | 233   | 113.517 | 10.03 |
| chr3R | 21499149 | 21500003 | C15       | 347   | 113.517 | 10.03 |
| chr3R | 21561422 | 21562013 | slou      | 4522  | 118.04  | 12.09 |
| chr3R | 21581398 | 21582449 | lnR       | 8427  | 48.3177 | 6.14  |
| chr3R | 21589771 | 21590467 | lnR       | 164   | 222.118 | 17.60 |
| chr3R | 21591163 | 21591456 | lnR       | 855   | 9.92342 | 2.76  |
| chr3R | 21591789 | 21592571 | lnR       | 278   | 43.2564 | 6.08  |
| chr3R | 21591789 | 21592571 | CR43653   | 50    | 43.2564 | 6.08  |
| chr3R | 21598652 | 21598910 | CR43653   | 6413  | 21.9567 | 4.65  |
| chr3R | 21604591 | 21606090 | CR44034   | 10134 | 250.716 | 16.33 |
| chr3R | 21606599 | 21607022 | CR44034   | 8919  | 42.3433 | 5.93  |
| chr3R | 21613233 | 21613643 | CR44034   | 2296  | 46.0093 | 7.14  |
| chr3R | 21616097 | 21616614 | CR44034   | 670   | 40.5183 | 5.83  |
| chr3R | 21618158 | 21619557 | lnR       | 587   | 316.742 | 30.67 |
| chr3R | 21626373 | 21627044 | mir-11    | 4200  | 121.515 | 12.22 |
| chr3R | 21628088 | 21629045 | E2f1      | 3971  | 14.9957 | 3.68  |
| chr3R | 21629786 | 21631257 | E2f1      | 1945  | 316.742 | 19.35 |
| chr3R | 21632174 | 21633994 | E2f1      | 460   | 316.742 | 25.23 |
| chr3R | 21632174 | 21633994 | CR46055   | 449   | 316.742 | 25.23 |
| chr3R | 21632174 | 21633994 | E2f1      | 80    | 316.742 | 25.23 |
| chr3R | 21659873 | 21660858 | E2f1      | 425   | 10.7809 | 2.92  |
| chr3R | 21719396 | 21720842 | CG31176   | 108   | 233.136 | 15.43 |
| chr3R | 21782344 | 21782708 | tsl       | 26    | 27.621  | 4.67  |
| chr3R | 21794009 | 21794351 | mir-999   | 4167  | 25.6968 | 5.66  |
| chr3R | 21807860 | 21809044 | CASK      | 65    | 173.546 | 15.77 |
| chr3R | 21814544 | 21814995 | CASK      | 6081  | 56.4866 | 9.04  |
| chr3R | 21821629 | 21822779 | CASK      | 837   | 34.8621 | 5.54  |
| chr3R | 21829320 | 21829676 | Gr93a     | 3025  | 18.44   | 4.50  |
| chr3R | 21848765 | 21849560 | Gr93d     | 2316  | 39.9142 | 5.61  |
| chr3R | 21852359 | 21853104 | glec      | 3713  | 25.9153 | 4.78  |
| chr3R | 21853621 | 21854567 | glec      | 2304  | 316.742 | 23.00 |
| chr3R | 21855850 | 21857088 | glec      | 34    | 316.742 | 17.84 |
| chr3R | 21874915 | 21875602 | CG6656    | 85    | 316.742 | 33.31 |
| chr3R | 21930324 | 21930674 | CG17843   | 16835 | 13.0345 | 3.29  |
| chr3R | 21948058 | 21949707 | Eip93F    | 170   | 316.742 | 44.24 |
| chr3R | 21957925 | 21958224 | Eip93F    | 8880  | 11.1824 | 2.87  |
| chr3R | 21961877 | 21962133 | Eip93F    | 10420 | 11.7756 | 3.34  |
| chr3R | 21964460 | 21964788 | Eip93F    | 7714  | 14.0334 | 3.80  |
| chr3R | 21965767 | 21966119 | Eip93F    | 6411  | 9.71851 | 3.20  |
| chr3R | 21970603 | 21972636 | Eip93F    | 209   | 316.742 | 29.65 |
| chr3R | 21985571 | 21985982 | Eip93F    | 13434 | 10.903  | 3.06  |
| chr3R | 22018941 | 22019240 | CG6439    | 102   | 8.87506 | 2.82  |
| chr3R | 22022893 | 22023161 | Mitofilin | 61    | 10.296  | 2.74  |
| chr3R | 22041581 | 22043092 | how       | 540   | 316.742 | 28.06 |
| chr3R | 22053931 | 22054345 | how       | 12013 | 19.8561 | 4.61  |
| chr3R | 22086164 | 22086605 | CG5778    | 84    | 23.3428 | 4.54  |
| chr3R | 22133536 | 22134127 | SKIP      | 28    | 56.8965 | 7.20  |
| chr3R | 22324091 | 22324673 | CG34377   | 424   | 14.0411 | 4.07  |
| chr3R | 22356516 | 22357602 | Sar1      | 362   | 31.4472 | 4.56  |
| chr3R | 22362317 | 22362848 | PSR       | 288   | 26.897  | 4.26  |
| chr3R | 22362317 | 22362848 | Muted     | 40    | 26.897  | 4.26  |
| chr3R | 22362317 | 22362848 | CG7071    | 40    | 26.897  | 4.26  |
| chr3R | 22367185 | 22370071 | CG5380    | 2461  | 130.47  | 13.15 |
| chr3R | 22367185 | 22370071 | PyK       | 553   | 130.47  | 13.15 |
| chr3R | 22447927 | 22448291 | CG34376   | 41    | 30.076  | 4.60  |
| chr3R | 22464708 | 22465119 | CG7054    | 106   | 17.4391 | 3.63  |
| chr3R | 22469040 | 22469558 | Nrx-1     | 18    | 13.0315 | 3.68  |
| chr3R | 22469943 | 22470550 | Nrx-1     | 791   | 40.7714 | 6.65  |
| chr3R | 22476679 | 22477051 | mir-4952  | 3977  | 26.1495 | 5.49  |
| chr3R | 22504928 | 22505382 | Octbeta1R | 7902  | 28.4446 | 5.94  |
| chr3R | 22526599 | 22527055 | CG5346    | 1924  | 22.3929 | 4.48  |
| chr3R | 22527545 | 22528020 | CG5346    | 974   | 13.9247 | 3.61  |
| chr3R | 22528283 | 22528730 | CG5346    | 116   | 55.5103 | 7.73  |
| chr3R | 22539813 | 22540185 | CG5326    | 9     | 20.9594 | 4.51  |
| chr3R | 22539813 | 22540185 | CR45646   | 85    | 20.9594 | 4.51  |
| chr3R | 22570010 | 22570375 | CG33110   | 43    | 13.0388 | 3.47  |
| chr3R | 22571955 | 22572256 | CG33110   | 1958  | 12.8238 | 3.63  |
| chr3R | 22578904 | 22579485 | CSN6      | 1609  | 39.818  | 5.92  |
| chr3R | 22587643 | 22588150 | Efa6      | 56    | 50.8385 | 6.14  |
| chr3R | 22597350 | 22597932 | Efa6      | 9794  | 13.756  | 3.80  |
| chr3R | 22598196 | 22598699 | Efa6      | 10694 | 110.71  | 10.79 |
| chr3R | 22624757 | 22625236 | loco      | 1592  | 27.0898 | 5.36  |
| chr3R | 22626067 | 22627494 | loco      | 330   | 316.742 | 22.57 |
| chr3R | 22632960 | 22633397 | loco      | 140   | 51.85   | 8.02  |
| chr3R | 22666254 | 22668199 | wake      | 326   | 316.742 | 19.50 |

|       |          |          |               |       |         |       |
|-------|----------|----------|---------------|-------|---------|-------|
| chr3R | 22684182 | 22684555 | Gclm          | 2127  | 26.2552 | 4.84  |
| chr3R | 22686156 | 22686702 | Gclm          | 34    | 112.519 | 10.23 |
| chr3R | 22698160 | 22698847 | Cyp6d4        | 156   | 210.043 | 17.95 |
| chr3R | 22726921 | 22727493 | CG45049       | 202   | 127.74  | 11.60 |
| chr3R | 22750710 | 22751414 | CG7029        | 296   | 16.3998 | 3.57  |
| chr3R | 22750710 | 22751414 | Usp12-46      | 296   | 16.3998 | 3.57  |
| chr3R | 22752794 | 22753180 | CG7029        | 1593  | 36.4994 | 6.07  |
| chr3R | 22753753 | 22755632 | CG7029        | 1     | 143.16  | 13.71 |
| chr3R | 22767646 | 22767993 | CG13841       | 108   | 27.4159 | 4.87  |
| chr3R | 22781367 | 22781898 | CR43654       | 157   | 110.554 | 10.48 |
| chr3R | 22781367 | 22781898 | CG7029        | 105   | 110.554 | 10.48 |
| chr3R | 22898466 | 22899441 | klg           | 63    | 84.3983 | 11.15 |
| chr3R | 22998186 | 22998481 | Nha2          | 246   | 11.9203 | 3.42  |
| chr3R | 23046313 | 23046579 | CG17121       | 1723  | 14.7363 | 3.57  |
| chr3R | 23048019 | 23048499 | CG17121       | 16    | 35.8167 | 5.57  |
| chr3R | 23048881 | 23049155 | CG17121       | 853   | 19.8068 | 4.15  |
| chr3R | 23057383 | 23057749 | CG17119       | 3     | 39.8056 | 6.46  |
| chr3R | 23058446 | 23059307 | CG17119       | 25    | 177.82  | 15.31 |
| chr3R | 23066206 | 23066691 | CG17111       | 746   | 28.0128 | 4.25  |
| chr3R | 23067040 | 23068202 | CG17111       | 107   | 316.742 | 27.71 |
| chr3R | 23091639 | 23091968 | CG17110       | 81    | 24.2141 | 4.71  |
| chr3R | 23091639 | 23091968 | CG6726        | 28    | 24.2141 | 4.71  |
| chr3R | 23112568 | 23113330 | Cow           | 84    | 67.4279 | 8.18  |
| chr3R | 23117495 | 23118016 | Rassf         | 124   | 40.0881 | 5.70  |
| chr3R | 23156770 | 23157966 | unk           | 575   | 86.0425 | 8.12  |
| chr3R | 23173419 | 23174212 | lrk1          | 206   | 174.539 | 13.90 |
| chr3R | 23175085 | 23175583 | lrk1          | 1438  | 19.4026 | 4.37  |
| chr3R | 23190198 | 23191574 | cnc           | 170   | 316.742 | 26.27 |
| chr3R | 23200934 | 23201584 | cnc           | 543   | 176.666 | 13.30 |
| chr3R | 23214814 | 23215327 | cnc           | 494   | 59.6655 | 6.13  |
| chr3R | 23220226 | 23220480 | cnc           | 1591  | 17.8883 | 4.06  |
| chr3R | 23221089 | 23222127 | cnc           | 490   | 242.341 | 16.39 |
| chr3R | 23225300 | 23227293 | cnc           | 94    | 316.742 | 30.35 |
| chr3R | 23238922 | 23240423 | CG4467        | 91    | 143.704 | 14.60 |
| chr3R | 23248788 | 23249384 | CG4467        | 166   | 189.701 | 14.05 |
| chr3R | 23278846 | 23279508 | orb           | 1611  | 100.553 | 12.71 |
| chr3R | 23280674 | 23281226 | orb           | 47    | 79.934  | 7.80  |
| chr3R | 23280674 | 23281226 | Cdc16         | 297   | 79.934  | 7.80  |
| chr3R | 23292912 | 23293659 | pnt           | 1849  | 316.742 | 25.32 |
| chr3R | 23295070 | 23295942 | pnt           | 285   | 316.742 | 25.77 |
| chr3R | 23314151 | 23314745 | pnt           | 121   | 232.487 | 18.57 |
| chr3R | 23323330 | 23323861 | pnt           | 9384  | 15.7062 | 3.94  |
| chr3R | 23334253 | 23334971 | CR46090       | 773   | 316.742 | 31.96 |
| chr3R | 23345949 | 23347876 | pnt           | 96    | 179.148 | 12.97 |
| chr3R | 23372487 | 23372778 | CR44322       | 46    | 10.155  | 3.26  |
| chr3R | 23374304 | 23375154 | CG42828       | 892   | 23.1465 | 4.00  |
| chr3R | 23383633 | 23384162 | CG4393        | 950   | 88.992  | 10.10 |
| chr3R | 23384535 | 23385596 | CG4393        | 420   | 157.804 | 12.57 |
| chr3R | 23385950 | 23386498 | CG4393        | 1448  | 126.494 | 8.99  |
| chr3R | 23419694 | 23419996 | CG43694       | 6253  | 13.8304 | 3.75  |
| chr3R | 23472080 | 23473122 | CG4374        | 452   | 316.742 | 21.32 |
| chr3R | 23519376 | 23519705 | lrk2          | 117   | 18.4482 | 4.06  |
| chr3R | 23557158 | 23557574 | beat-IV       | 65    | 50.3686 | 7.61  |
| chr3R | 23601386 | 23601933 | CG10183       | 2685  | 49.9213 | 6.45  |
| chr3R | 23654141 | 23654726 | CG31145       | 15325 | 35.8515 | 5.21  |
| chr3R | 23666884 | 23667464 | CG31145       | 2616  | 50.5791 | 7.27  |
| chr3R | 23667820 | 23668148 | CG31145       | 1710  | 12.0718 | 2.87  |
| chr3R | 23668546 | 23668835 | CG31145       | 945   | 17.4126 | 3.85  |
| chr3R | 23669342 | 23670538 | CG31145       | 481   | 316.742 | 32.97 |
| chr3R | 23686024 | 23687010 | SPE           | 476   | 208.953 | 20.30 |
| chr3R | 23722546 | 23724181 | CG10365       | 581   | 316.742 | 27.35 |
| chr3R | 23727991 | 23728603 | CG10365       | 178   | 142.375 | 13.96 |
| chr3R | 23729874 | 23730395 | RNaseMRP:RNA  | 231   | 11.6945 | 3.14  |
| chr3R | 23773867 | 23774250 | CG10208       | 35    | 36.6094 | 6.01  |
| chr3R | 23781528 | 23783390 | Nup98-96      | 1021  | 120.687 | 10.17 |
| chr3R | 23781528 | 23783390 | mbc           | 878   | 120.687 | 10.17 |
| chr3R | 23786704 | 23787297 | mbc           | 5227  | 35.1018 | 5.27  |
| chr3R | 23818631 | 23819427 | CG33111       | 156   | 296.886 | 18.82 |
| chr3R | 23818631 | 23819427 | eIF4G2        | 156   | 296.886 | 18.82 |
| chr3R | 23818631 | 23819427 | CG33111       | 262   | 296.886 | 18.82 |
| chr3R | 23818631 | 23819427 | eIF4G2        | 262   | 296.886 | 18.82 |
| chr3R | 23818631 | 23819427 | CG33111       | 262   | 296.886 | 18.82 |
| chr3R | 23859375 | 23859875 | snRNA:U1:21D  | 47    | 72.9341 | 8.05  |
| chr3R | 23859375 | 23859875 | snRNA:U1:95Cb | 47    | 72.9341 | 8.05  |
| chr3R | 23859375 | 23859875 | snRNA:U1:95Ca | 47    | 72.9341 | 8.05  |

|       |          |          |               |       |         |       |
|-------|----------|----------|---------------|-------|---------|-------|
| chr3R | 23886964 | 23887617 | Pli           | 2673  | 54.6282 | 6.91  |
| chr3R | 23889794 | 23890197 | Pli           | 49    | 20.6603 | 3.74  |
| chr3R | 23909714 | 23910039 | sba           | 13139 | 15.5784 | 3.60  |
| chr3R | 23912925 | 23913450 | sba           | 9730  | 12.8033 | 3.37  |
| chr3R | 23921861 | 23923127 | sba           | 189   | 316.742 | 22.10 |
| chr3R | 23933962 | 23934334 | CG5854        | 137   | 9.73415 | 2.86  |
| chr3R | 23942849 | 23943445 | Gdh           | 54    | 316.742 | 18.47 |
| chr3R | 23948280 | 23948614 | CG12268       | 65    | 8.7402  | 2.91  |
| chr3R | 23951201 | 23951473 | CG12268       | 2890  | 12.9814 | 3.46  |
| chr3R | 23958287 | 23958729 | Aats-glupro   | 39    | 13.9129 | 3.46  |
| chr3R | 23958287 | 23958729 | AP-1sigma     | 220   | 13.9129 | 3.46  |
| chr3R | 23962729 | 23963390 | CG31140       | 207   | 176.44  | 17.47 |
| chr3R | 23963734 | 23964400 | CG31140       | 756   | 30.0512 | 5.84  |
| chr3R | 23965020 | 23965674 | CG31140       | 2227  | 91.0422 | 10.14 |
| chr3R | 23986483 | 23987038 | CG13603       | 241   | 41.7978 | 6.19  |
| chr3R | 23986483 | 23987038 | CG5902        | 169   | 41.7978 | 6.19  |
| chr3R | 23992790 | 23993753 | CG13604       | 221   | 41.7114 | 5.70  |
| chr3R | 23992790 | 23993753 | Rab7          | 41    | 41.7114 | 5.70  |
| chr3R | 24006341 | 24007267 | KrT95D        | 106   | 316.742 | 26.50 |
| chr3R | 24008150 | 24008436 | KrT95D        | 1747  | 14.9793 | 3.44  |
| chr3R | 24031036 | 24031978 | KrT95D        | 399   | 316.742 | 28.17 |
| chr3R | 24037544 | 24037877 | Miro          | 22    | 16.9814 | 3.63  |
| chr3R | 24038145 | 24038514 | spas          | 79    | 23.094  | 4.55  |
| chr3R | 24046451 | 24048426 | Rox8          | 34    | 201.036 | 14.37 |
| chr3R | 24046451 | 24048426 | CG5986        | 455   | 201.036 | 14.37 |
| chr3R | 24046451 | 24048426 | Rox8          | 656   | 201.036 | 14.37 |
| chr3R | 24046451 | 24048426 | CG5986        | 963   | 201.036 | 14.37 |
| chr3R | 24050666 | 24051093 | Atg6          | 87    | 40.3887 | 5.45  |
| chr3R | 24050666 | 24051093 | CG5991        | 87    | 40.3887 | 5.45  |
| chr3R | 24051547 | 24051851 | CG5991        | 8     | 22.4092 | 4.48  |
| chr3R | 24057139 | 24057553 | Hsp68         | 41    | 48.8687 | 7.23  |
| chr3R | 24092566 | 24093459 | Syx1A         | 12974 | 76.3813 | 8.50  |
| chr3R | 24104663 | 24106392 | Syx1A         | 788   | 119.664 | 9.88  |
| chr3R | 24108657 | 24109217 | 4EHP          | 25    | 27.6152 | 4.51  |
| chr3R | 24140927 | 24141568 | Kal1          | 34    | 67.4523 | 9.67  |
| chr3R | 24152312 | 24152786 | p38a          | 236   | 42.4062 | 5.41  |
| chr3R | 24152312 | 24152786 | CG6178        | 211   | 42.4062 | 5.41  |
| chr3R | 24218512 | 24219181 | CG17786       | 173   | 316.742 | 21.71 |
| chr3R | 24221018 | 24222138 | cav           | 873   | 37.3645 | 5.45  |
| chr3R | 24221018 | 24222138 | twin          | 540   | 37.3645 | 5.45  |
| chr3R | 24221018 | 24222138 | cav           | 445   | 37.3645 | 5.45  |
| chr3R | 24221018 | 24222138 | twin          | 10    | 37.3645 | 5.45  |
| chr3R | 24230555 | 24231493 | mask          | 264   | 53.059  | 6.27  |
| chr3R | 24230555 | 24231493 | CR44092       | 360   | 53.059  | 6.27  |
| chr3R | 24230555 | 24231493 | CR45217       | 539   | 53.059  | 6.27  |
| chr3R | 24233536 | 24233921 | mask          | 1363  | 62.7912 | 8.11  |
| chr3R | 24234333 | 24234672 | mask          | 642   | 16.7357 | 3.20  |
| chr3R | 24259118 | 24260827 | jar           | 79    | 316.742 | 30.93 |
| chr3R | 24263669 | 24264913 | jar           | 45    | 41.6379 | 6.56  |
| chr3R | 24270979 | 24271449 | jar           | 25    | 68.1794 | 7.80  |
| chr3R | 24272423 | 24273365 | Orct2         | 100   | 69.1758 | 8.67  |
| chr3R | 24276295 | 24276963 | Orct          | 2     | 111.313 | 12.76 |
| chr3R | 24279384 | 24279656 | CG13611       | 59    | 15.7851 | 4.09  |
| chr3R | 24283812 | 24284065 | CG6356        | 8     | 9.05671 | 3.13  |
| chr3R | 24294877 | 24296178 | crb           | 831   | 252.81  | 15.63 |
| chr3R | 24318916 | 24320690 | BRWD3         | 1565  | 24.3346 | 4.06  |
| chr3R | 24318916 | 24320690 | CR46093       | 782   | 24.3346 | 4.06  |
| chr3R | 24348421 | 24348794 | CG5746        | 142   | 12.4763 | 3.30  |
| chr3R | 24457034 | 24458003 | nAChRalpha1   | 180   | 78.7625 | 10.01 |
| chr3R | 24485000 | 24486087 | nAChRalpha2   | 222   | 101.299 | 10.31 |
| chr3R | 24514615 | 24515133 | nAChRbeta2    | 274   | 23.2138 | 5.07  |
| chr3R | 24518261 | 24518747 | Pp1alpha-96A  | 6     | 5.55156 | 2.31  |
| chr3R | 24543026 | 24544055 | CG5789        | 57    | 78.5812 | 8.42  |
| chr3R | 24544382 | 24544923 | Esyt2         | 110   | 84.3417 | 8.79  |
| chr3R | 24548765 | 24549178 | Esyt2         | 23    | 80.1568 | 8.83  |
| chr3R | 24555515 | 24555957 | snRNA:U6:96Ac | 399   | 13.3134 | 3.47  |
| chr3R | 24555515 | 24555957 | snRNA:U6:96Ab | 399   | 13.3134 | 3.47  |
| chr3R | 24555515 | 24555957 | snRNA:U6:96Aa | 399   | 13.3134 | 3.47  |
| chr3R | 24556873 | 24557468 | snRNA:U6:96Ac | 79    | 84.1719 | 8.22  |
| chr3R | 24556873 | 24557468 | snRNA:U6:96Ab | 79    | 84.1719 | 8.22  |
| chr3R | 24556873 | 24557468 | snRNA:U6:96Aa | 79    | 84.1719 | 8.22  |
| chr3R | 24565443 | 24566294 | REPTOR        | 6093  | 316.742 | 28.48 |
| chr3R | 24566614 | 24567155 | REPTOR        | 5164  | 95.3197 | 10.66 |
| chr3R | 24571649 | 24573220 | REPTOR        | 265   | 316.742 | 27.23 |
| chr3R | 24577394 | 24577717 | REPTOR        | 55    | 19.1872 | 4.39  |

|       |          |          |           |       |         |       |
|-------|----------|----------|-----------|-------|---------|-------|
| chr3R | 24581840 | 24583029 | REPTOR    | 815   | 87.5762 | 8.11  |
| chr3R | 24586197 | 24587033 | mld       | 1051  | 316.742 | 31.83 |
| chr3R | 24588788 | 24589414 | mld       | 61    | 264.81  | 15.06 |
| chr3R | 24625604 | 24626146 | atl       | 129   | 21.9943 | 4.00  |
| chr3R | 24626682 | 24626982 | atl       | 1142  | 19.4612 | 4.20  |
| chr3R | 24629842 | 24630869 | WscK      | 453   | 244.2   | 17.54 |
| chr3R | 24629842 | 24630869 | atl       | 62    | 244.2   | 17.54 |
| chr3R | 24649686 | 24650250 | puf       | 13    | 78.6763 | 8.60  |
| chr3R | 24649686 | 24650250 | ash2      | 94    | 78.6763 | 8.60  |
| chr3R | 24651004 | 24651764 | ash2      | 59    | 316.742 | 35.05 |
| chr3R | 24662178 | 24662676 | slo       | 22    | 13.9567 | 3.84  |
| chr3R | 24719877 | 24720251 | tok       | 3     | 35.7603 | 5.43  |
| chr3R | 24767537 | 24769790 | CR45650   | 258   | 316.742 | 23.52 |
| chr3R | 24767537 | 24769790 | CG13631   | 608   | 316.742 | 23.52 |
| chr3R | 24770585 | 24771635 | CG42331   | 822   | 215.768 | 17.25 |
| chr3R | 24787077 | 24787484 | CG5805    | 136   | 17.6934 | 3.86  |
| chr3R | 24798767 | 24800014 | Ude       | 13    | 316.742 | 36.62 |
| chr3R | 24813757 | 24814034 | CG5807    | 61    | 16.2756 | 3.60  |
| chr3R | 24860204 | 24860940 | CG13639   | 143   | 215.156 | 14.62 |
| chr3R | 24862573 | 24863235 | CG7016    | 59    | 316.742 | 21.02 |
| chr3R | 24875945 | 24876739 | CG3744    | 468   | 40.1874 | 5.98  |
| chr3R | 24894323 | 24895404 | CG31121   | 95    | 316.742 | 35.64 |
| chr3R | 24894323 | 24895404 | CG11069   | 41    | 316.742 | 35.64 |
| chr3R | 24944399 | 24945081 | ssh       | 9     | 11.6946 | 3.06  |
| chr3R | 24984184 | 24984461 | tnc       | 72    | 10.8025 | 3.36  |
| chr3R | 24985184 | 24985751 | tnc       | 187   | 94.2217 | 11.17 |
| chr3R | 25025100 | 25025610 | Hr96      | 187   | 23.0297 | 4.31  |
| chr3R | 25033065 | 25033534 | Smg6      | 200   | 14.7192 | 3.44  |
| chr3R | 25037987 | 25038506 | CG6422    | 590   | 17.3238 | 3.74  |
| chr3R | 25047521 | 25047813 | CG11790   | 45    | 20.2486 | 4.30  |
| chr3R | 25049605 | 25050555 | CG11791   | 95    | 251.226 | 16.71 |
| chr3R | 25056745 | 25057248 | Unc-13-4B | 64    | 116.218 | 10.58 |
| chr3R | 25080364 | 25080897 | fd96Ca    | 2072  | 85.2416 | 8.92  |
| chr3R | 25094512 | 25095129 | fd96Cb    | 156   | 103.335 | 9.62  |
| chr3R | 25122492 | 25123015 | CG31108   | 165   | 56.626  | 6.34  |
| chr3R | 25122492 | 25123015 | CG31510   | 165   | 56.626  | 6.34  |
| chr3R | 25137711 | 25138162 | danr      | 159   | 86.9989 | 10.29 |
| chr3R | 25196580 | 25197260 | CG13653   | 1508  | 70.593  | 9.35  |
| chr3R | 25199507 | 25199983 | CG13654   | 19    | 51.2862 | 6.89  |
| chr3R | 25205200 | 25205972 | Cad96Ca   | 2590  | 15.8396 | 3.56  |
| chr3R | 25207343 | 25208885 | Cad96Ca   | 119   | 316.742 | 40.79 |
| chr3R | 25219052 | 25219723 | CG31103   | 28    | 130.374 | 12.10 |
| chr3R | 25247258 | 25247623 | RpS27     | 10    | 12.0506 | 3.06  |
| chr3R | 25258702 | 25259349 | CG11857   | 28    | 56.5488 | 6.99  |
| chr3R | 25265597 | 25265967 | Aats-gln  | 30    | 14.5646 | 3.41  |
| chr3R | 25265597 | 25265967 | RIOK2     | 92    | 14.5646 | 3.41  |
| chr3R | 25292693 | 25293221 | CG31098   | 7     | 143.003 | 11.50 |
| chr3R | 25295210 | 25295811 | CG31102   | 31    | 74.8234 | 10.47 |
| chr3R | 25303918 | 25304374 | CG31436   | 34    | 137.501 | 12.79 |
| chr3R | 25305648 | 25306047 | CG31436   | 1720  | 30.4911 | 4.66  |
| chr3R | 25308239 | 25308553 | CG10550   | 7     | 42.4062 | 5.41  |
| chr3R | 25315929 | 25316401 | CG10559   | 71    | 72.5432 | 7.76  |
| chr3R | 25322540 | 25322919 | CG10562   | 2     | 18.8892 | 3.55  |
| chr3R | 25328422 | 25330125 | CHKov1    | 549   | 316.742 | 37.83 |
| chr3R | 25331025 | 25331351 | CHKov2    | 31    | 25.1315 | 4.22  |
| chr3R | 25438354 | 25438653 | Fur1      | 34547 | 21.7323 | 4.60  |
| chr3R | 25471879 | 25473277 | Fur1      | 334   | 267.182 | 15.83 |
| chr3R | 25482325 | 25483024 | XNP       | 27    | 121.334 | 10.68 |
| chr3R | 25490605 | 25491019 | Dhap-at   | 8     | 17.083  | 3.79  |
| chr3R | 25491337 | 25491718 | CG5112    | 6     | 20.1186 | 4.27  |
| chr3R | 25515315 | 25516403 | msi       | 464   | 316.742 | 35.17 |
| chr3R | 25517928 | 25518516 | msi       | 100   | 192.903 | 14.08 |
| chr3R | 25526653 | 25527031 | msi       | 8549  | 22.0038 | 4.59  |
| chr3R | 25532723 | 25533145 | msi       | 14629 | 43.899  | 7.10  |
| chr3R | 25588378 | 25589925 | mir-1000  | 492   | 54.7032 | 7.77  |
| chr3R | 25588378 | 25589925 | CR45910   | 271   | 54.7032 | 7.77  |
| chr3R | 25613508 | 25613800 | CG5079    | 46    | 17.9011 | 4.31  |
| chr3R | 25626724 | 25627031 | Ssadh     | 14    | 20.6194 | 4.04  |
| chr3R | 25646833 | 25648314 | jjgr1     | 97    | 254.294 | 13.62 |
| chr3R | 25652168 | 25652444 | mir-92b   | 882   | 21.104  | 3.53  |
| chr3R | 25661766 | 25662199 | RASSF8    | 14    | 9.09143 | 2.55  |
| chr3R | 25719578 | 25720301 | LpR2      | 8     | 33.2496 | 5.20  |
| chr3R | 25735449 | 25736237 | CR46102   | 2344  | 123.786 | 10.33 |
| chr3R | 25740218 | 25741029 | LpR2      | 178   | 316.742 | 27.00 |
| chr3R | 25752780 | 25753166 | LpR1      | 14    | 24.6015 | 4.92  |



|       |          |          |                 |       |         |       |
|-------|----------|----------|-----------------|-------|---------|-------|
| chr3R | 25756602 | 25757116 | LpR1            | 3582  | 16.1587 | 3.98  |
| chr3R | 25760055 | 25760758 | LpR1            | 116   | 316.742 | 27.49 |
| chr3R | 25782957 | 25783315 | CG4960          | 4136  | 76.7957 | 9.75  |
| chr3R | 25855903 | 25856266 | CG5890          | 28    | 22.2828 | 4.40  |
| chr3R | 25877517 | 25878012 | Tsp96F          | 3674  | 12.5966 | 3.20  |
| chr3R | 25880300 | 25881579 | Tsp96F          | 597   | 116.14  | 11.24 |
| chr3R | 25882015 | 25882386 | SppL            | 88    | 11.1242 | 3.15  |
| chr3R | 25883918 | 25884267 | SppL            | 1528  | 31.3617 | 5.61  |
| chr3R | 25888334 | 25889095 | Lnk             | 219   | 28.4877 | 4.36  |
| chr3R | 25893377 | 25893682 | CG5913          | 28    | 13.8687 | 3.45  |
| chr3R | 25969855 | 25970211 | CG42261         | 87    | 25.2963 | 4.66  |
| chr3R | 25983168 | 25983715 | Nf1             | 437   | 161.911 | 12.56 |
| chr3R | 26005806 | 26006656 | E(spl)mbeta-HLH | 100   | 128.394 | 11.21 |
| chr3R | 26007053 | 26007398 | CR45039         | 196   | 10.3591 | 3.02  |
| chr3R | 26008141 | 26009043 | CR45039         | 1354  | 140.919 | 12.99 |
| chr3R | 26017276 | 26017854 | E(spl)m2-BFM    | 93    | 84.9881 | 10.38 |
| chr3R | 26020526 | 26022001 | CR43644         | 662   | 253.52  | 18.64 |
| chr3R | 26020526 | 26022001 | E(spl)m3-HLH    | 84    | 253.52  | 18.64 |
| chr3R | 26036806 | 26037094 | E(spl)m7-HLH    | 77    | 20.2088 | 4.12  |
| chr3R | 26041584 | 26043014 | gro             | 49    | 316.742 | 29.61 |
| chr3R | 26055176 | 26055544 | Dak1            | 80    | 26.2698 | 4.40  |
| chr3R | 26098445 | 26099657 | dysf            | 563   | 97.1587 | 9.76  |
| chr3R | 26105631 | 26107577 | CG31324         | 80    | 130.953 | 10.37 |
| chr3R | 26117401 | 26117969 | CR46060         | 7735  | 250.907 | 17.09 |
| chr3R | 26224756 | 26225082 | CG12290         | 5371  | 17.2612 | 3.93  |
| chr3R | 26227189 | 26227471 | CG12290         | 2908  | 11.597  | 2.82  |
| chr3R | 26229430 | 26230520 | CG12290         | 67    | 316.742 | 29.34 |
| chr3R | 26250036 | 26250367 | Ald             | 8130  | 12.4894 | 3.61  |
| chr3R | 26258441 | 26259288 | Ald             | 570   | 225.303 | 17.70 |
| chr3R | 26260556 | 26261710 | CR44321         | 7     | 214.327 | 14.71 |
| chr3R | 26260556 | 26261710 | Ald             | 504   | 214.327 | 14.71 |
| chr3R | 26262147 | 26262841 | CG6154          | 17    | 44.1161 | 6.68  |
| chr3R | 26318075 | 26318622 | CG33970         | 49    | 25.7691 | 4.81  |
| chr3R | 26325831 | 26326238 | CR42765         | 693   | 18.8895 | 4.03  |
| chr3R | 26347859 | 26348249 | CG6036          | 2670  | 8.72603 | 3.09  |
| chr3R | 26438277 | 26438660 | tx              | 2301  | 15.4439 | 3.83  |
| chr3R | 26440329 | 26441203 | tx              | 150   | 135.958 | 12.43 |
| chr3R | 26461099 | 26461929 | CG5455          | 74    | 316.742 | 26.74 |
| chr3R | 26462206 | 26462841 | CG5455          | 1033  | 316.742 | 34.13 |
| chr3R | 26464513 | 26464845 | CG5455          | 840   | 11.7794 | 3.04  |
| chr3R | 26534118 | 26537400 | plum            | 1966  | 207.717 | 13.72 |
| chr3R | 26534118 | 26537400 | scrib           | 834   | 207.717 | 13.72 |
| chr3R | 26541312 | 26541634 | CR46084         | 1706  | 27.0802 | 5.00  |
| chr3R | 26543159 | 26543443 | CR46084         | 103   | 12.2343 | 3.49  |
| chr3R | 26547552 | 26548207 | CR46084         | 4767  | 19.1687 | 3.98  |
| chr3R | 26566811 | 26567243 | scrib           | 1598  | 42.1964 | 5.66  |
| chr3R | 26567620 | 26569067 | scrib           | 104   | 316.742 | 22.56 |
| chr3R | 26681868 | 26682340 | beat-VII        | 104   | 64.3803 | 8.11  |
| chr3R | 26713906 | 26714445 | amon            | 26    | 18.9036 | 4.21  |
| chr3R | 26747949 | 26748356 | CR45562         | 9796  | 53.14   | 7.86  |
| chr3R | 26797753 | 26800158 | TI              | 774   | 316.742 | 16.91 |
| chr3R | 26801123 | 26802035 | TI              | 2404  | 175.05  | 12.99 |
| chr3R | 26862518 | 26863270 | Lerp            | 92    | 137.054 | 10.21 |
| chr3R | 26866533 | 26867575 | ball            | 62    | 49.5976 | 5.85  |
| chr3R | 26866533 | 26867575 | His2Av          | 59    | 49.5976 | 5.85  |
| chr3R | 26875338 | 26875794 | Rb97D           | 83    | 10.0788 | 2.82  |
| chr3R | 26881269 | 26881899 | T48             | 209   | 53.1251 | 6.82  |
| chr3R | 26896120 | 26896529 | T48             | 14670 | 14.0843 | 3.81  |
| chr3R | 26915628 | 26915962 | sda             | 37    | 24.6023 | 4.60  |
| chr3R | 26916648 | 26917111 | sda             | 1108  | 50.8071 | 7.91  |
| chr3R | 26958287 | 26958729 | CG6330          | 8     | 36.0308 | 5.90  |
| chr3R | 26960524 | 26960966 | CG6330          | 2240  | 35.1018 | 5.27  |
| chr3R | 26966888 | 26967404 | CG5521          | 275   | 33.8783 | 5.13  |
| chr3R | 26980216 | 26980727 | CG14253         | 55    | 138.928 | 14.27 |
| chr3R | 26988202 | 26988992 | CG31075         | 6     | 122.22  | 11.17 |
| chr3R | 27067447 | 27067781 | CG43935         | 2148  | 22.697  | 4.67  |
| chr3R | 27069635 | 27070489 | spz             | 73    | 316.742 | 33.07 |
| chr3R | 27070947 | 27071541 | spz             | 1147  | 73.8892 | 7.67  |
| chr3R | 27086670 | 27086990 | Cpr97Ea         | 219   | 23.7295 | 5.19  |
| chr3R | 27091056 | 27091457 | Cpr97Eb         | 82    | 20.8105 | 4.18  |
| chr3R | 27094318 | 27094773 | CG14259         | 27    | 72.4897 | 9.27  |
| chr3R | 27111831 | 27112583 | gb              | 188   | 40.2093 | 6.13  |
| chr3R | 27111831 | 27112583 | CG5815          | 483   | 40.2093 | 6.13  |
| chr3R | 27129398 | 27130125 | CG6059          | 4972  | 176.692 | 14.32 |
| chr3R | 27149659 | 27152191 | CG6051          | 825   | 316.742 | 30.89 |

|       |          |          |             |      |         |       |
|-------|----------|----------|-------------|------|---------|-------|
| chr3R | 27149659 | 27152191 | Men-b       | 1417 | 316.742 | 30.89 |
| chr3R | 27153090 | 27153462 | Men-b       | 1615 | 40.0501 | 5.89  |
| chr3R | 27157007 | 27158230 | grass       | 231  | 242.52  | 17.90 |
| chr3R | 27160445 | 27161435 | CG5909      | 470  | 129.798 | 11.61 |
| chr3R | 27193992 | 27194600 | Ser         | 38   | 183.62  | 16.00 |
| chr3R | 27244489 | 27245847 | CG18766     | 1    | 179.104 | 12.37 |
| chr3R | 27244489 | 27245847 | CR46085     | 82   | 179.104 | 12.37 |
| chr3R | 27246519 | 27246843 | CG5984      | 1325 | 33.3622 | 6.30  |
| chr3R | 27253368 | 27253662 | TfIIA-L     | 42   | 14.4274 | 3.47  |
| chr3R | 27263473 | 27264193 | woc         | 371  | 30.4083 | 5.28  |
| chr3R | 27270303 | 27270762 | l(3)mbt     | 2726 | 24.6114 | 4.43  |
| chr3R | 27274799 | 27275474 | CG5938      | 107  | 19.1689 | 3.56  |
| chr3R | 27279623 | 27280045 | mrt         | 593  | 33.0108 | 5.49  |
| chr3R | 27280761 | 27282715 | mrt         | 381  | 316.742 | 27.03 |
| chr3R | 27288235 | 27289056 | bigmax      | 39   | 16.4422 | 3.72  |
| chr3R | 27288235 | 27289056 | Hmu         | 281  | 16.4422 | 3.72  |
| chr3R | 27292076 | 27292372 | CG3348      | 22   | 12.9883 | 3.51  |
| chr3R | 27437347 | 27437772 | side        | 64   | 18.6255 | 4.21  |
| chr3R | 27463019 | 27463374 | CG13978     | 966  | 16.0475 | 4.37  |
| chr3R | 27558925 | 27559323 | Klp98A      | 13   | 22.9002 | 4.24  |
| chr3R | 27561036 | 27561428 | CG5646      | 20   | 21.0603 | 4.34  |
| chr3R | 27579528 | 27579800 | wdb         | 1854 | 15.6621 | 3.62  |
| chr3R | 27580043 | 27582331 | wdb         | 212  | 316.742 | 21.58 |
| chr3R | 27605181 | 27605761 | dsd         | 2072 | 13.0316 | 3.46  |
| chr3R | 27607235 | 27607502 | dsd         | 10   | 15.6621 | 3.62  |
| chr3R | 27608072 | 27608607 | Tusp        | 4    | 38.8796 | 5.33  |
| chr3R | 27635980 | 27636982 | CG5611      | 280  | 258.474 | 17.44 |
| chr3R | 27635980 | 27636982 | Mtl         | 71   | 258.474 | 17.44 |
| chr3R | 27654384 | 27655262 | tau         | 2137 | 58.5422 | 6.26  |
| chr3R | 27656596 | 27657276 | tau         | 119  | 34.4626 | 5.00  |
| chr3R | 27662061 | 27663076 | unc80       | 86   | 40.8008 | 7.15  |
| chr3R | 27677376 | 27677797 | CG5590      | 77   | 16.6485 | 3.45  |
| chr3R | 27699576 | 27700524 | ALiX        | 80   | 94.956  | 9.70  |
| chr3R | 27699576 | 27700524 | btz         | 330  | 94.956  | 9.70  |
| chr3R | 27736232 | 27737198 | Ets98B      | 61   | 316.742 | 19.22 |
| chr3R | 27742371 | 27743431 | Ets98B      | 218  | 39.1275 | 5.43  |
| chr3R | 27905711 | 27906233 | CG34353     | 153  | 60.0564 | 8.19  |
| chr3R | 27922707 | 27923070 | Rpl4        | 21   | 24.3164 | 4.73  |
| chr3R | 27924759 | 27926073 | mino        | 383  | 316.742 | 27.81 |
| chr3R | 27924759 | 27926073 | CR45566     | 205  | 316.742 | 27.81 |
| chr3R | 27924759 | 27926073 | mino        | 91   | 316.742 | 27.81 |
| chr3R | 27947759 | 27948120 | mfrn        | 71   | 15.5019 | 3.90  |
| chr3R | 27948542 | 27948982 | Gp93        | 68   | 91.1543 | 9.30  |
| chr3R | 27987255 | 27989518 | betaTub97EF | 849  | 316.742 | 30.36 |
| chr3R | 28025084 | 28027012 | CG34362     | 447  | 103.387 | 12.16 |
| chr3R | 28047224 | 28047718 | CG34362     | 11   | 30.5821 | 5.54  |
| chr3R | 28146336 | 28146921 | CG34354     | 324  | 75.7022 | 9.44  |
| chr3R | 28324772 | 28325256 | larp        | 1229 | 151.906 | 13.95 |
| chr3R | 28325913 | 28327178 | larp        | 89   | 316.742 | 17.90 |
| chr3R | 28328183 | 28328784 | larp        | 99   | 88.0499 | 8.38  |
| chr3R | 28330621 | 28331408 | larp        | 339  | 242.818 | 14.75 |
| chr3R | 28332025 | 28332365 | larp        | 1003 | 38.7283 | 5.94  |
| chr3R | 28335300 | 28336612 | larp        | 191  | 52.4933 | 6.58  |
| chr3R | 28339489 | 28340587 | Gfat2       | 35   | 316.742 | 31.03 |
| chr3R | 28339489 | 28340587 | Moca-cyp    | 533  | 316.742 | 31.03 |
| chr3R | 28348509 | 28348881 | Or98b       | 3569 | 26.5164 | 5.32  |
| chr3R | 28417941 | 28418305 | beat-VI     | 28   | 20.3193 | 4.97  |
| chr3R | 28544516 | 28545160 | CG12413     | 41   | 21.8927 | 4.70  |
| chr3R | 28585236 | 28585804 | fkh         | 247  | 60.9276 | 7.70  |
| chr3R | 28600333 | 28600612 | Hrb98DE     | 76   | 14.1844 | 3.22  |
| chr3R | 28634204 | 28635356 | CG10011     | 513  | 137.172 | 10.60 |
| chr3R | 28654555 | 28654974 | CG31050     | 4294 | 73.8299 | 9.00  |
| chr3R | 28672094 | 28672617 | Sid         | 1694 | 131.097 | 10.71 |
| chr3R | 28681850 | 28682553 | CG9990      | 96   | 144.698 | 12.39 |
| chr3R | 28683353 | 28683925 | CG9990      | 1451 | 8.19301 | 2.71  |
| chr3R | 28690563 | 28690906 | CG9990      | 1012 | 12.0918 | 3.46  |
| chr3R | 28735321 | 28735836 | AstA-R2     | 9208 | 31.1266 | 6.08  |
| chr3R | 28811061 | 28811407 | wdn         | 99   | 13.6351 | 3.20  |
| chr3R | 28830946 | 28831937 | WASp        | 59   | 90.1063 | 10.75 |
| chr3R | 28844305 | 28845464 | Apc         | 527  | 40.4212 | 4.91  |
| chr3R | 28844305 | 28845464 | spg         | 6    | 40.4212 | 4.91  |
| chr3R | 28850111 | 28850529 | spg         | 4956 | 29.9462 | 4.68  |
| chr3R | 28857630 | 28859703 | Inx3        | 91   | 316.742 | 36.80 |
| chr3R | 28860527 | 28861953 | Inx3        | 1963 | 316.742 | 38.85 |
| chr3R | 28879888 | 28880487 | CG14523     | 31   | 70.7619 | 8.95  |

|       |          |          |             |       |         |       |
|-------|----------|----------|-------------|-------|---------|-------|
| chr3R | 28883439 | 28883798 | CG14526     | 112   | 37.7441 | 6.49  |
| chr3R | 28888739 | 28889856 | Doa         | 514   | 70.0158 | 6.79  |
| chr3R | 28891650 | 28892210 | Doa         | 16    | 52.9048 | 6.78  |
| chr3R | 28970201 | 28970712 | DIP-gamma   | 43    | 52.3432 | 7.70  |
| chr3R | 28970201 | 28970712 | CR45669     | 125   | 52.3432 | 7.70  |
| chr3R | 28990026 | 28991066 | mir-4947    | 17999 | 85.9925 | 10.34 |
| chr3R | 29039014 | 29040389 | Slu7        | 1014  | 73.2334 | 7.58  |
| chr3R | 29039014 | 29040389 | Pkc98E      | 256   | 73.2334 | 7.58  |
| chr3R | 29062866 | 29065142 | Cul5        | 1777  | 316.742 | 35.07 |
| chr3R | 29062866 | 29065142 | CG11873     | 925   | 316.742 | 35.07 |
| chr3R | 29069601 | 29070003 | CG11873     | 6009  | 23.1017 | 4.68  |
| chr3R | 29073821 | 29074618 | CG11873     | 10342 | 287.943 | 16.27 |
| chr3R | 29083872 | 29084520 | CG11873     | 4075  | 79.7819 | 9.54  |
| chr3R | 29087209 | 29089065 | CG11873     | 73    | 139.896 | 14.04 |
| chr3R | 29122613 | 29123628 | yem         | 483   | 34.4378 | 5.75  |
| chr3R | 29122613 | 29123628 | CG11880     | 7     | 34.4378 | 5.75  |
| chr3R | 29138712 | 29139030 | CG14516     | 32    | 19.2173 | 3.99  |
| chr3R | 29148144 | 29148565 | CG11882     | 221   | 22.3763 | 4.74  |
| chr3R | 29148144 | 29148565 | Pglym78     | 32    | 22.3763 | 4.74  |
| chr3R | 29157233 | 29158530 | CG11897     | 21    | 316.742 | 22.95 |
| chr3R | 29194849 | 29195282 | CG14509     | 27    | 20.4943 | 4.54  |
| chr3R | 29199850 | 29200756 | CG11899     | 94    | 87.6915 | 9.98  |
| chr3R | 29206505 | 29207794 | Cyt-c1L     | 2634  | 316.742 | 20.90 |
| chr3R | 29214004 | 29216157 | CR31044     | 566   | 218.288 | 15.02 |
| chr3R | 29214004 | 29216157 | mir-279     | 457   | 218.288 | 15.02 |
| chr3R | 29229155 | 29229490 | Usp1        | 90    | 9.47267 | 2.84  |
| chr3R | 29238555 | 29238993 | CG11951     | 21    | 88.3075 | 8.96  |
| chr3R | 29244330 | 29244765 | CG31445     | 53    | 217.364 | 20.72 |
| chr3R | 29250194 | 29250928 | SP1029      | 84    | 259.815 | 17.18 |
| chr3R | 29318635 | 29319667 | Cnx99A      | 158   | 22.7232 | 4.31  |
| chr3R | 29377109 | 29377766 | Ptp99A      | 276   | 72.6134 | 9.87  |
| chr3R | 29457190 | 29458507 | Ptp99A      | 84    | 270.82  | 18.91 |
| chr3R | 29478993 | 29479692 | Ptp99A      | 85    | 197.939 | 17.03 |
| chr3R | 29493228 | 29493660 | CG2310      | 56    | 28.5967 | 5.02  |
| chr3R | 29503429 | 29503704 | Trc8        | 55    | 12.1207 | 3.00  |
| chr3R | 29555850 | 29556546 | Dr          | 184   | 316.742 | 23.42 |
| chr3R | 29571910 | 29572482 | Dr          | 15845 | 28.332  | 5.39  |
| chr3R | 29591676 | 29592475 | alph        | 271   | 52.185  | 6.27  |
| chr3R | 29618537 | 29619414 | CG1907      | 79    | 316.742 | 21.60 |
| chr3R | 29659930 | 29660305 | Dop1R2      | 145   | 16.4023 | 4.23  |
| chr3R | 29681578 | 29682815 | CG7582      | 76    | 316.742 | 23.89 |
| chr3R | 29681578 | 29682815 | Gycalpha99B | 148   | 316.742 | 23.89 |
| chr3R | 29691005 | 29691555 | dmrt99B     | 1282  | 260.743 | 21.37 |
| chr3R | 29716965 | 29717370 | Obp99b      | 229   | 26.4821 | 4.21  |
| chr3R | 29718582 | 29718889 | CG15506     | 116   | 15.3558 | 3.70  |
| chr3R | 29723130 | 29723740 | Pcd         | 283   | 91.3273 | 7.37  |
| chr3R | 29725690 | 29726791 | Kul         | 614   | 127.81  | 12.35 |
| chr3R | 29736657 | 29737004 | CG7601      | 142   | 15.1029 | 3.65  |
| chr3R | 29736657 | 29737004 | CIA30       | 77    | 15.1029 | 3.65  |
| chr3R | 29748663 | 29749340 | ATPsyngamma | 13    | 14.7001 | 3.43  |
| chr3R | 29748663 | 29749340 | yata        | 362   | 14.7001 | 3.43  |
| chr3R | 29759942 | 29760356 | CR44953     | 1101  | 128.498 | 15.40 |
| chr3R | 29761694 | 29762023 | CR44953     | 2819  | 31.292  | 5.94  |
| chr3R | 29764025 | 29764684 | kay         | 1515  | 66.5543 | 9.12  |
| chr3R | 29771528 | 29775044 | kay         | 161   | 316.742 | 38.93 |
| chr3R | 29778426 | 29779051 | fig         | 1797  | 138.634 | 13.20 |
| chr3R | 29782018 | 29783021 | kay         | 88    | 316.742 | 25.54 |
| chr3R | 29788496 | 29789150 | kay         | 194   | 198.544 | 17.27 |
| chr3R | 29802783 | 29803174 | CG7834      | 8     | 25.8391 | 4.64  |
| chr3R | 29806760 | 29807427 | ca          | 472   | 16.7979 | 3.74  |
| chr3R | 29806760 | 29807427 | ncd         | 155   | 16.7979 | 3.74  |
| chr3R | 29806760 | 29807427 | ca          | 45    | 16.7979 | 3.74  |
| chr3R | 29829272 | 29829712 | Atg16       | 3824  | 18.252  | 4.13  |
| chr3R | 29841190 | 29841989 | Cad99C      | 28    | 104.608 | 10.84 |
| chr3R | 29868602 | 29868966 | Zip99C      | 29    | 13.8698 | 3.32  |
| chr3R | 29876240 | 29877443 | CG31038     | 2     | 316.742 | 40.47 |
| chr3R | 29877876 | 29878548 | CG31038     | 1121  | 72.0038 | 7.28  |
| chr3R | 29927086 | 29927463 | CG15522     | 50    | 29.3832 | 5.69  |
| chr3R | 29934599 | 29934869 | elf2B-alpha | 1141  | 11.2142 | 2.97  |
| chr3R | 29997875 | 29998226 | CG11504     | 161   | 15.2096 | 3.44  |
| chr3R | 30014472 | 30015379 | CG7920      | 53    | 46.2298 | 5.67  |
| chr3R | 30021839 | 30022948 | Mgat2       | 27    | 192.723 | 12.50 |
| chr3R | 30021839 | 30022948 | RpS28a      | 454   | 192.723 | 12.50 |
| chr3R | 30021839 | 30022948 | Axn         | 647   | 192.723 | 12.50 |
| chr3R | 30046104 | 30046453 | RpL32       | 20    | 11.9505 | 2.59  |

|       |          |          |             |       |         |       |
|-------|----------|----------|-------------|-------|---------|-------|
| chr3R | 30058225 | 30058559 | sima        | 74    | 23.9297 | 3.96  |
| chr3R | 30064909 | 30065196 | sima        | 2127  | 13.5986 | 3.49  |
| chr3R | 30084359 | 30084649 | sima        | 15017 | 23.1387 | 4.76  |
| chr3R | 30090126 | 30090793 | sima        | 9020  | 116.768 | 11.88 |
| chr3R | 30095537 | 30095914 | sima        | 3782  | 22.4629 | 4.90  |
| chr3R | 30098247 | 30098526 | sima        | 1105  | 18.3114 | 3.92  |
| chr3R | 30099115 | 30099863 | sima        | 93    | 316.742 | 36.13 |
| chr3R | 30100342 | 30101052 | sima        | 1292  | 40.2833 | 5.86  |
| chr3R | 30105165 | 30105424 | CR46112     | 1732  | 17.6173 | 4.31  |
| chr3R | 30108415 | 30108677 | CR46112     | 1531  | 12.1935 | 3.33  |
| chr3R | 30114482 | 30114771 | CR46112     | 7632  | 23.0009 | 4.31  |
| chr3R | 30134010 | 30134716 | Tpi         | 52    | 39.8854 | 5.37  |
| chr3R | 30150498 | 30150879 | AdoR        | 1116  | 30.556  | 5.24  |
| chr3R | 30151357 | 30152419 | CG15529     | 246   | 27.4159 | 4.87  |
| chr3R | 30160279 | 30160769 | CG11498     | 85    | 63.5953 | 9.73  |
| chr3R | 30170509 | 30171237 | CG31028     | 533   | 35.6411 | 6.72  |
| chr3R | 30201006 | 30201503 | CG9743      | 1724  | 19.678  | 4.37  |
| chr3R | 30202678 | 30204181 | CG9743      | 797   | 316.742 | 26.96 |
| chr3R | 30214641 | 30215293 | CecB        | 1352  | 24.2103 | 3.96  |
| chr3R | 30237683 | 30237951 | CG43448     | 98    | 21.5423 | 4.56  |
| chr3R | 30243418 | 30243818 | CG9737      | 297   | 14.2841 | 3.24  |
| chr3R | 30246602 | 30246967 | CG9733      | 90    | 16.5691 | 3.84  |
| chr3R | 30271036 | 30271412 | CR46113     | 2272  | 20.0809 | 4.45  |
| chr3R | 30272773 | 30273211 | CR46113     | 637   | 27.8114 | 5.52  |
| chr3R | 30277848 | 30278186 | hdc         | 36    | 22.9723 | 4.66  |
| chr3R | 30281808 | 30282330 | hdc         | 4151  | 23.8303 | 4.46  |
| chr3R | 30282682 | 30282954 | hdc         | 4860  | 15.5881 | 3.56  |
| chr3R | 30293310 | 30293669 | CG34300     | 13186 | 52.3385 | 6.91  |
| chr3R | 30296623 | 30297109 | CG34300     | 9760  | 52.6469 | 6.60  |
| chr3R | 30325737 | 30326278 | CG34300     | 19433 | 66.4818 | 9.85  |
| chr3R | 30337957 | 30338929 | hdc         | 19575 | 316.742 | 27.83 |
| chr3R | 30344067 | 30345222 | hdc         | 13321 | 225.602 | 18.85 |
| chr3R | 30345538 | 30345916 | hdc         | 12131 | 19.3343 | 4.64  |
| chr3R | 30386505 | 30389569 | Fer1HCH     | 1681  | 316.742 | 25.23 |
| chr3R | 30386505 | 30389569 | Fer2LCH     | 1497  | 316.742 | 25.23 |
| chr3R | 30386505 | 30389569 | Fer1HCH     | 1122  | 316.742 | 25.23 |
| chr3R | 30386505 | 30389569 | Fer2LCH     | 162   | 316.742 | 25.23 |
| chr3R | 30427952 | 30428243 | CG2218      | 13    | 13.3157 | 3.30  |
| chr3R | 30449874 | 30451229 | aralar1     | 62    | 316.742 | 50.42 |
| chr3R | 30452687 | 30454617 | aralar1     | 680   | 316.742 | 23.33 |
| chr3R | 30465658 | 30466311 | PH4alphaEFB | 71    | 316.742 | 16.27 |
| chr3R | 30526663 | 30527846 | jdp         | 54    | 316.742 | 21.04 |
| chr3R | 30532200 | 30532663 | tmod        | 167   | 104.279 | 12.61 |
| chr3R | 30563111 | 30563970 | tmod        | 489   | 185.528 | 14.73 |
| chr3R | 30587033 | 30587731 | CG9717      | 156   | 144.206 | 11.66 |
| chr3R | 30599732 | 30601089 | CG2246      | 495   | 316.742 | 19.62 |
| chr3R | 30616136 | 30617852 | CR45571     | 4439  | 105.419 | 12.70 |
| chr3R | 30764026 | 30764586 | zfh1        | 1601  | 189.147 | 16.52 |
| chr3R | 30765457 | 30766129 | zfh1        | 184   | 149.016 | 14.60 |
| chr3R | 30781485 | 30782274 | zfh1        | 1262  | 86.2342 | 10.62 |
| chr3R | 30800440 | 30800770 | wts         | 5981  | 21.5869 | 4.51  |
| chr3R | 30803053 | 30804522 | wts         | 3016  | 316.742 | 25.74 |
| chr3R | 30805624 | 30806679 | wts         | 678   | 316.742 | 21.32 |
| chr3R | 30808410 | 30809203 | cindr       | 68    | 51.8043 | 6.54  |
| chr3R | 30815076 | 30815580 | cindr       | 2300  | 59.8715 | 7.69  |
| chr3R | 30821958 | 30822522 | cindr       | 175   | 59.1048 | 7.56  |
| chr3R | 30827514 | 30827950 | CG15544     | 50    | 31.5835 | 5.17  |
| chr3R | 30874604 | 30875148 | CG15546     | 1231  | 55.3422 | 7.70  |
| chr3R | 30876074 | 30876529 | CG15546     | 25    | 15.534  | 3.42  |
| chr3R | 30880742 | 30881402 | CG12071     | 163   | 96.5014 | 10.87 |
| chr3R | 30888124 | 30889186 | Sap-r       | 58    | 86.1179 | 7.56  |
| chr3R | 30909001 | 30909361 | Ptx1        | 3563  | 23.7856 | 4.62  |
| chr3R | 30912211 | 30912836 | Ptx1        | 214   | 316.742 | 21.19 |
| chr3R | 31016736 | 31017197 | 5-HT7       | 72    | 69.8943 | 7.99  |
| chr3R | 31058760 | 31059019 | dco         | 2328  | 17.0112 | 3.88  |
| chr3R | 31059393 | 31059888 | dco         | 1528  | 59.8898 | 7.00  |
| chr3R | 31060189 | 31061699 | dco         | 273   | 64.5592 | 7.12  |
| chr3R | 31086381 | 31086713 | CG11317     | 10813 | 22.4583 | 3.90  |
| chr3R | 31097120 | 31097565 | CG11317     | 12    | 73.4654 | 10.31 |
| chr3R | 31119795 | 31120158 | Prosalpha3T | 3448  | 32.1474 | 5.69  |
| chr3R | 31130222 | 31130612 | CG15556     | 20    | 35.1117 | 6.04  |
| chr3R | 31134087 | 31134508 | Gycbeta100B | 139   | 72.628  | 8.51  |
| chr3R | 31168478 | 31169287 | stops       | 19    | 45.7966 | 7.95  |
| chr3R | 31218389 | 31219712 | ATPsynC     | 429   | 35.8344 | 4.72  |
| chr3R | 31218389 | 31219712 | mir-4949    | 108   | 35.8344 | 4.72  |

|       |          |          |              |       |         |       |
|-------|----------|----------|--------------|-------|---------|-------|
| chr3R | 31218389 | 31219712 | ATPsynC      | 79    | 35.8344 | 4.72  |
| chr3R | 31220594 | 31223109 | CG12054      | 1084  | 102.329 | 9.56  |
| chr3R | 31310413 | 31311336 | CG34347      | 139   | 73.0528 | 10.63 |
| chr3R | 31381654 | 31382224 | CG1607       | 64    | 32.2279 | 4.93  |
| chr3R | 31384073 | 31384656 | CG1607       | 18    | 183.103 | 14.38 |
| chr3R | 31405086 | 31405904 | Gprk2        | 154   | 15.8127 | 3.43  |
| chr3R | 31405086 | 31405904 | CG11337      | 54    | 15.8127 | 3.43  |
| chr3R | 31437662 | 31437942 | lox          | 22109 | 8.21781 | 2.55  |
| chr3R | 31441780 | 31442166 | lox          | 17919 | 18.1167 | 4.05  |
| chr3R | 31457993 | 31458555 | lox          | 1540  | 36.65   | 5.17  |
| chr3R | 31462780 | 31463327 | CG11334      | 169   | 14.4384 | 3.56  |
| chr3R | 31462780 | 31463327 | CG11333      | 94    | 14.4384 | 3.56  |
| chr3R | 31592666 | 31593075 | CG1774       | 62    | 69.7793 | 8.88  |
| chr3R | 31605871 | 31606201 | CycG         | 3793  | 16.341  | 3.85  |
| chr3R | 31607879 | 31609285 | CycG         | 746   | 137.807 | 10.75 |
| chr3R | 31609640 | 31609988 | CycG         | 28    | 25.5276 | 4.11  |
| chr3R | 31610394 | 31611629 | CycG         | 152   | 14.462  | 2.99  |
| chr3R | 31610394 | 31611629 | Med          | 85    | 14.462  | 2.99  |
| chr3R | 31621797 | 31622307 | kek6         | 106   | 101.951 | 11.39 |
| chr3R | 31672431 | 31673440 | CG1815       | 3285  | 61.2302 | 6.73  |
| chr3R | 31688889 | 31689848 | CR45565      | 572   | 316.742 | 31.18 |
| chr3R | 31709173 | 31709604 | CR34046      | 19    | 8.02872 | 2.74  |
| chr3R | 31711424 | 31714312 | ttk          | 279   | 316.742 | 45.71 |
| chr3R | 31714544 | 31714966 | ttk          | 846   | 25.1436 | 4.64  |
| chr3R | 31715253 | 31715966 | ttk          | 1708  | 142.555 | 11.03 |
| chr3R | 31720112 | 31720441 | ttk          | 4749  | 20.9051 | 4.43  |
| chr3R | 31721374 | 31722385 | ttk          | 2943  | 231.771 | 18.32 |
| chr3R | 31722928 | 31723222 | ttk          | 1929  | 12.4007 | 3.38  |
| chr3R | 31723481 | 31726335 | ttk          | 187   | 316.742 | 18.44 |
| chr3R | 31738869 | 31739765 | Ef1alpha100E | 383   | 54.65   | 8.17  |
| chr3R | 31748070 | 31748745 | CG1910       | 118   | 60.3675 | 6.49  |
| chr3R | 31777552 | 31778320 | faf          | 556   | 178.632 | 12.08 |
| chr3R | 31805056 | 31805473 | CG42233      | 68    | 8.10853 | 2.39  |
| chr3R | 31805056 | 31805473 | CG1971       | 121   | 8.10853 | 2.39  |
| chr3R | 31809474 | 31810630 | CG11576      | 38    | 243.84  | 17.25 |
| chr3R | 31812453 | 31813738 | RhoGAP100F   | 54    | 38.4703 | 4.84  |
| chr3R | 31822526 | 31823032 | RhoGAP100F   | 3055  | 79.9318 | 10.49 |
| chr3R | 31825452 | 31825994 | RhoGAP100F   | 91    | 30.0976 | 5.60  |
| chr3R | 31937136 | 31938663 | heph         | 1032  | 22.5954 | 5.01  |
| chr3R | 31945702 | 31946055 | heph         | 8473  | 17.2351 | 4.22  |
| chr3R | 31985505 | 31985949 | heph         | 50    | 53.391  | 6.93  |
| chr3R | 31986743 | 31987151 | CG2003       | 72    | 61.7771 | 8.52  |
| chr3R | 32015165 | 32016140 | heph         | 60    | 104.394 | 11.24 |
| chr3R | 32015165 | 32016140 | CR45557      | 360   | 104.394 | 11.24 |
| chr3R | 32067984 | 32068482 | Map205       | 245   | 63.3416 | 6.02  |
| chr3R | 32071953 | 32072304 | Map205       | 3631  | 22.9723 | 4.66  |
| chr4  | 56190    | 56626    | ci           | 32    | 59.1772 | 7.18  |
| chr4  | 56190    | 56626    | CR43957      | 133   | 59.1772 | 7.18  |
| chr4  | 69291    | 69740    | pan          | 1     | 12.6962 | 3.00  |
| chr4  | 276333   | 276654   | Nfl          | 179   | 32.3271 | 5.23  |
| chr4  | 276333   | 276654   | CR44023      | 26    | 32.3271 | 5.23  |
| chr4  | 385215   | 385503   | dati         | 2984  | 23.4619 | 5.05  |
| chr4  | 388500   | 389347   | dati         | 733   | 102.719 | 12.44 |
| chr4  | 404334   | 404647   | dati         | 8840  | 29.5424 | 5.33  |
| chr4  | 419659   | 419946   | CR43437      | 6292  | 16.1249 | 4.24  |
| chr4  | 426938   | 427467   | CR44024      | 79    | 24.9044 | 5.56  |
| chr4  | 501329   | 502092   | zfh2         | 48    | 316.742 | 36.56 |
| chr4  | 502590   | 503214   | zfh2         | 1117  | 58.8379 | 7.27  |
| chr4  | 504841   | 505906   | zfh2         | 3495  | 284.705 | 17.20 |
| chr4  | 506955   | 508907   | zfh2         | 5958  | 316.742 | 29.25 |
| chr4  | 554873   | 555277   | Thd1         | 2760  | 28.165  | 4.65  |
| chr4  | 554873   | 555277   | CR43958      | 2760  | 28.165  | 4.65  |
| chr4  | 554873   | 555277   | Thd1         | 2760  | 28.165  | 4.65  |
| chr4  | 557086   | 558287   | Thd1         | 526   | 243.085 | 15.98 |
| chr4  | 557086   | 558287   | CR43958      | 526   | 243.085 | 15.98 |
| chr4  | 557086   | 558287   | Thd1         | 526   | 243.085 | 15.98 |
| chr4  | 557086   | 558287   | Pur-alpha    | 687   | 243.085 | 15.98 |
| chr4  | 660221   | 660628   | gw           | 204   | 21.8111 | 4.06  |
| chr4  | 703825   | 704809   | ey           | 136   | 90.7138 | 8.67  |
| chr4  | 715628   | 716175   | ey           | 8619  | 11.9158 | 3.32  |
| chr4  | 807658   | 808696   | Sox102F      | 636   | 187.965 | 15.09 |
| chr4  | 833899   | 834767   | Sox102F      | 120   | 125.803 | 10.19 |
| chr4  | 844499   | 844806   | fd102C       | 118   | 11.9203 | 3.42  |
| chr4  | 904850   | 905586   | unc-13       | 554   | 120.923 | 10.80 |
| chr4  | 989328   | 989929   | toy          | 126   | 268.962 | 19.01 |

|      |         |         |            |       |         |       |
|------|---------|---------|------------|-------|---------|-------|
| chr4 | 1031721 | 1032031 | CG11076    | 131   | 18.9364 | 3.99  |
| chr4 | 1031721 | 1032031 | ATPsynbeta | 25    | 18.9364 | 3.99  |
| chr4 | 1088458 | 1088792 | sv         | 146   | 14.1991 | 3.61  |
| chr4 | 1293056 | 1293476 | Cadps      | 61308 | 110.467 | 9.78  |
| chr4 | 1306022 | 1306852 | Cadps      | 74651 | 156.224 | 17.58 |
| chr4 | 1318384 | 1319384 | Cadps      | 87123 | 316.742 | 13.55 |
| chrX | 58441   | 59519   | CR40469    | 63605 | 316.742 | 36.04 |
| chrX | 245888  | 246423  | G9a        | 286   | 30.8834 | 5.68  |
| chrX | 275990  | 276673  | ewg        | 194   | 57.3916 | 8.86  |
| chrX | 279277  | 279558  | ewg        | 226   | 10.8049 | 3.26  |
| chrX | 334678  | 335077  | CG32816    | 70    | 84.8484 | 11.67 |
| chrX | 492914  | 495130  | CG17896    | 0     | 112.296 | 11.04 |
| chrX | 492914  | 495130  | CG17778    | 1118  | 112.296 | 11.04 |
| chrX | 497445  | 497795  | CR44891    | 254   | 11.6375 | 3.30  |
| chrX | 498382  | 500389  | svr        | 221   | 316.742 | 28.77 |
| chrX | 498382  | 500389  | CR44892    | 45    | 316.742 | 28.77 |
| chrX | 498382  | 500389  | svr        | 456   | 316.742 | 28.77 |
| chrX | 519988  | 520976  | elav       | 432   | 53.8103 | 8.10  |
| chrX | 521278  | 523972  | elav       | 105   | 316.742 | 37.97 |
| chrX | 530225  | 531336  | CG4293     | 112   | 25.3684 | 4.87  |
| chrX | 530225  | 531336  | Appl       | 97    | 25.3684 | 4.87  |
| chrX | 541718  | 542401  | Appl       | 10731 | 49.6123 | 8.34  |
| chrX | 590510  | 590826  | vnd        | 418   | 12.1935 | 3.38  |
| chrX | 616880  | 617540  | CG13366    | 516   | 27.5528 | 5.09  |
| chrX | 621005  | 621315  | CG13365    | 3     | 12.4611 | 3.34  |
| chrX | 628935  | 629524  | RpL36      | 141   | 49.4311 | 7.33  |
| chrX | 635889  | 637323  | su(sable)  | 214   | 98.9188 | 10.32 |
| chrX | 654181  | 656733  | Hmt4-20    | 100   | 286.896 | 20.09 |
| chrX | 654181  | 656733  | SkpA       | 1075  | 286.896 | 20.09 |
| chrX | 686304  | 687930  | sdk        | 584   | 316.742 | 25.62 |
| chrX | 755695  | 756557  | CG5254     | 240   | 180.801 | 15.93 |
| chrX | 758853  | 759778  | CG5273     | 572   | 13.1368 | 3.11  |
| chrX | 761590  | 762204  | CR44965    | 23    | 13.1443 | 3.71  |
| chrX | 764822  | 765370  | RpL22      | 16    | 17.9731 | 4.13  |
| chrX | 764822  | 765370  | CR44966    | 141   | 17.9731 | 4.13  |
| chrX | 768311  | 769186  | fz3        | 1110  | 19.5637 | 4.28  |
| chrX | 769775  | 770228  | fz3        | 32    | 31.5617 | 5.29  |
| chrX | 796399  | 796872  | CG16989    | 3417  | 15.2882 | 3.79  |
| chrX | 840455  | 841401  | CG43867    | 196   | 44.7887 | 7.18  |
| chrX | 884459  | 885063  | CG43867    | 507   | 10.9134 | 3.58  |
| chrX | 900733  | 901486  | CG43867    | 1756  | 316.742 | 26.15 |
| chrX | 908698  | 909383  | CG43867    | 14    | 34.7685 | 5.89  |
| chrX | 934990  | 936115  | TRAM       | 5     | 85.9    | 9.88  |
| chrX | 940596  | 940935  | CG3704     | 18    | 18.3298 | 4.63  |
| chrX | 945540  | 945880  | CG3703     | 62    | 24.263  | 5.41  |
| chrX | 1119203 | 1119945 | CG3655     | 15337 | 30.5821 | 5.54  |
| chrX | 1134046 | 1135349 | CG3655     | 49    | 44.7051 | 7.16  |
| chrX | 1232525 | 1233063 | CG3638     | 2268  | 76.7338 | 9.41  |
| chrX | 1233912 | 1236050 | CG3638     | 55    | 316.742 | 30.50 |
| chrX | 1236414 | 1236795 | CG3638     | 61    | 10.7    | 2.98  |
| chrX | 1241878 | 1242454 | CG11403    | 2263  | 216.17  | 16.57 |
| chrX | 1251849 | 1252693 | CG11403    | 12237 | 204.397 | 20.46 |
| chrX | 1261250 | 1261589 | Atf3       | 13851 | 18.8588 | 4.77  |
| chrX | 1274735 | 1277882 | Atf3       | 1222  | 316.742 | 30.93 |
| chrX | 1308347 | 1308841 | DAAM       | 153   | 55.0107 | 8.03  |
| chrX | 1310542 | 1310909 | DAAM       | 2239  | 9.74428 | 3.38  |
| chrX | 1321714 | 1322476 | DAAM       | 343   | 11.6561 | 3.65  |
| chrX | 1342030 | 1342413 | CG11412    | 14    | 17.4341 | 4.57  |
| chrX | 1370330 | 1370865 | ssx        | 41    | 19.9394 | 4.30  |
| chrX | 1375236 | 1375893 | AMPKalpha  | 44    | 121.065 | 11.00 |
| chrX | 1380015 | 1380326 | CG3719     | 450   | 7.09214 | 2.79  |
| chrX | 1380594 | 1381107 | CG32813    | 21    | 59.47   | 7.89  |
| chrX | 1387153 | 1389249 | CG32813    | 350   | 316.742 | 31.27 |
| chrX | 1392947 | 1393336 | CG11448    | 181   | 8.47249 | 2.89  |
| chrX | 1397838 | 1398266 | CG11448    | 4786  | 5.58338 | 2.45  |
| chrX | 1398705 | 1400120 | CG11448    | 6094  | 316.742 | 24.46 |
| chrX | 1408963 | 1409876 | futsch     | 639   | 38.2918 | 7.12  |
| chrX | 1410241 | 1410544 | futsch     | 1340  | 12.8627 | 3.70  |
| chrX | 1411244 | 1411926 | futsch     | 198   | 24.9044 | 5.56  |
| chrX | 1466558 | 1467426 | CG14777    | 221   | 104.434 | 10.51 |
| chrX | 1478495 | 1479098 | rush       | 171   | 28.0948 | 5.42  |
| chrX | 1483086 | 1483406 | sta        | 29    | 12.891  | 3.43  |
| chrX | 1507595 | 1508727 | Nmdar2     | 198   | 68.8071 | 10.23 |
| chrX | 1512778 | 1513122 | CG14795    | 119   | 21.066  | 3.89  |
| chrX | 1512778 | 1513122 | inc        | 147   | 21.066  | 3.89  |

|      |         |         |                  |       |         |       |
|------|---------|---------|------------------|-------|---------|-------|
| chrX | 1517587 | 1517983 | inc              | 4733  | 16.7357 | 4.47  |
| chrX | 1535303 | 1536108 | inc              | 22427 | 14.0411 | 4.07  |
| chrX | 1578472 | 1579217 | br               | 3920  | 19.5844 | 4.87  |
| chrX | 1614350 | 1614800 | br               | 937   | 10.2503 | 3.23  |
| chrX | 1616862 | 1621015 | Mur2B            | 1048  | 316.742 | 38.95 |
| chrX | 1623148 | 1623557 | br               | 610   | 73.7649 | 10.37 |
| chrX | 1656418 | 1656689 | dor              | 8493  | 8.95959 | 3.16  |
| chrX | 1773794 | 1774761 | Adar             | 68    | 21.5498 | 4.44  |
| chrX | 1793858 | 1794502 | CG32806          | 4517  | 39.3302 | 7.25  |
| chrX | 1809712 | 1810066 | CG14810          | 10513 | 12.1308 | 3.77  |
| chrX | 1811235 | 1811625 | CG14810          | 8943  | 17.4341 | 4.57  |
| chrX | 1824554 | 1825084 | CG42666          | 106   | 22.8586 | 4.91  |
| chrX | 1828212 | 1828523 | CG42666          | 1040  | 16.6813 | 4.30  |
| chrX | 1830578 | 1831604 | CG42666          | 78    | 316.742 | 26.82 |
| chrX | 1842899 | 1843554 | CG42666          | 182   | 85.9092 | 9.99  |
| chrX | 1861690 | 1862014 | deltaCOP         | 32    | 13.449  | 3.78  |
| chrX | 1893586 | 1893985 | mRpL16           | 3509  | 28.2992 | 5.46  |
| chrX | 1899362 | 1900228 | arm              | 2     | 96.1881 | 9.53  |
| chrX | 1907726 | 1908147 | Edem1            | 0     | 13.1054 | 3.64  |
| chrX | 1908734 | 1909211 | Edem1            | 66    | 18.8732 | 3.93  |
| chrX | 1908734 | 1909211 | Rbcn-3B          | 26    | 18.8732 | 3.93  |
| chrX | 1922847 | 1923404 | eIF2B-epsilon    | 320   | 9.08777 | 3.04  |
| chrX | 1922847 | 1923404 | Oocl             | 214   | 9.08777 | 3.04  |
| chrX | 1941667 | 1942081 | Hr4              | 79    | 93.9409 | 12.33 |
| chrX | 1943159 | 1943643 | Hr4              | 1453  | 70.9218 | 10.43 |
| chrX | 1946958 | 1948611 | Hr4              | 6308  | 316.742 | 32.06 |
| chrX | 1951685 | 1952079 | Hr4              | 9847  | 15.3684 | 4.27  |
| chrX | 1953014 | 1953276 | Hr4              | 11237 | 11.239  | 3.01  |
| chrX | 1963566 | 1964484 | Hr4              | 21938 | 30.5433 | 6.14  |
| chrX | 1964795 | 1965389 | Hr4              | 23096 | 85.9738 | 9.40  |
| chrX | 1967072 | 1967655 | Hr4              | 24899 | 47.6938 | 8.14  |
| chrX | 1975656 | 1976719 | Hr4              | 15962 | 316.742 | 50.80 |
| chrX | 1981748 | 1982316 | Hr4              | 10117 | 12.7565 | 3.87  |
| chrX | 1988451 | 1989403 | Hr4              | 3634  | 66.7095 | 10.03 |
| chrX | 1991080 | 1992378 | Hr4              | 169   | 64.6289 | 9.83  |
| chrX | 2009841 | 2010933 | CR45478          | 354   | 261.564 | 16.38 |
| chrX | 2009841 | 2010933 | mir-2496         | 11    | 261.564 | 16.38 |
| chrX | 2009841 | 2010933 | east             | 549   | 261.564 | 16.38 |
| chrX | 2011457 | 2013767 | east             | 15    | 173.001 | 13.00 |
| chrX | 2031798 | 2032250 | mir-4954         | 2899  | 34.8887 | 6.75  |
| chrX | 2036344 | 2036633 | Actn             | 12    | 17.958  | 4.62  |
| chrX | 2040913 | 2042463 | usp              | 479   | 36.371  | 5.54  |
| chrX | 2040913 | 2042463 | CG4313           | 76    | 36.371  | 5.54  |
| chrX | 2040913 | 2042463 | Actn             | 520   | 36.371  | 5.54  |
| chrX | 2040913 | 2042463 | usp              | 520   | 36.371  | 5.54  |
| chrX | 2040913 | 2042463 | Actn             | 520   | 36.371  | 5.54  |
| chrX | 2043640 | 2044015 | CG4325           | 14    | 20.6918 | 4.45  |
| chrX | 2048931 | 2050780 | moody            | 239   | 316.742 | 36.27 |
| chrX | 2060586 | 2062128 | Sik2             | 781   | 47.0061 | 6.56  |
| chrX | 2070008 | 2071099 | CG4199           | 40    | 50.3436 | 6.38  |
| chrX | 2071689 | 2072283 | CR44382          | 306   | 100.023 | 11.16 |
| chrX | 2071689 | 2072283 | CG4199           | 50    | 100.023 | 11.16 |
| chrX | 2080292 | 2080893 | CG16903          | 259   | 45.9589 | 6.53  |
| chrX | 2080292 | 2080893 | Unc-76           | 55    | 45.9589 | 6.53  |
| chrX | 2083459 | 2084311 | Unc-76           | 3241  | 316.742 | 40.06 |
| chrX | 2094089 | 2094892 | csw              | 297   | 149.519 | 15.11 |
| chrX | 2098473 | 2098800 | snRNA:Me18S-C102 | 3345  | 16.7966 | 4.33  |
| chrX | 2102059 | 2103182 | csw              | 84    | 306.722 | 26.31 |
| chrX | 2106511 | 2106927 | csw              | 1526  | 58.4408 | 8.73  |
| chrX | 2107488 | 2109272 | csw              | 40    | 26.9399 | 4.46  |
| chrX | 2112729 | 2113375 | csw              | 4979  | 9.74428 | 3.38  |
| chrX | 2121724 | 2124818 | ph-d             | 127   | 316.742 | 21.60 |
| chrX | 2125462 | 2125968 | ph-d             | 2428  | 108.411 | 9.83  |
| chrX | 2134464 | 2138847 | ph-p             | 138   | 316.742 | 23.21 |
| chrX | 2140459 | 2142134 | CG3835           | 115   | 283.023 | 22.34 |
| chrX | 2145214 | 2146508 | Pgd              | 11    | 27.0191 | 5.27  |
| chrX | 2155826 | 2156408 | wapl             | 175   | 218.524 | 18.67 |
| chrX | 2157896 | 2159069 | wapl             | 888   | 46.3942 | 6.24  |
| chrX | 2175788 | 2176291 | Cyp4d2           | 25    | 74.6483 | 9.68  |
| chrX | 2176566 | 2177098 | Cyp4d2           | 95    | 69.5886 | 9.27  |
| chrX | 2194292 | 2194662 | Mct1             | 97    | 45.7966 | 7.95  |
| chrX | 2221362 | 2222790 | Vinc             | 25    | 68.5012 | 7.33  |
| chrX | 2253808 | 2255773 | CG3091           | 1063  | 316.742 | 34.40 |
| chrX | 2259721 | 2260102 | CG3078           | 63    | 11.9218 | 3.27  |
| chrX | 2269520 | 2270914 | CG2924           | 554   | 59.9876 | 8.08  |

|      |         |         |         |       |         |       |
|------|---------|---------|---------|-------|---------|-------|
| chrX | 2269520 | 2270914 | CR45480 | 276   | 59.9876 | 8.08  |
| chrX | 2269520 | 2270914 | CG2924  | 490   | 59.9876 | 8.08  |
| chrX | 2274733 | 2275202 | CG2918  | 57    | 25.0781 | 5.02  |
| chrX | 2286244 | 2286723 | CG2865  | 6980  | 34.0192 | 6.65  |
| chrX | 2292614 | 2295017 | CG2865  | 97    | 316.742 | 35.01 |
| chrX | 2295684 | 2296767 | Raf     | 640   | 316.742 | 26.64 |
| chrX | 2297175 | 2297677 | Raf     | 2039  | 50.8336 | 7.51  |
| chrX | 2300379 | 2302532 | Raf     | 5675  | 316.742 | 35.85 |
| chrX | 2303272 | 2304531 | Raf     | 8465  | 316.742 | 33.56 |
| chrX | 2305106 | 2307173 | Raf     | 10563 | 316.742 | 23.78 |
| chrX | 2317344 | 2318020 | CR34052 | 4591  | 316.742 | 31.00 |
| chrX | 2323868 | 2324240 | CG14050 | 1711  | 21.8144 | 5.16  |
| chrX | 2325554 | 2326245 | CG14050 | 65    | 160.1   | 17.88 |
| chrX | 2334091 | 2334940 | llp6    | 413   | 21.8144 | 5.16  |
| chrX | 2362412 | 2362702 | CG2841  | 3799  | 24.7558 | 5.34  |
| chrX | 2366091 | 2366825 | CG2841  | 52    | 95.7768 | 11.34 |
| chrX | 2383274 | 2383950 | PsGEF   | 3936  | 40.2365 | 7.35  |
| chrX | 2447908 | 2448370 | z       | 273   | 14.8847 | 3.94  |
| chrX | 2469630 | 2470317 | boi     | 13    | 110.455 | 9.86  |
| chrX | 2545406 | 2545775 | trol    | 195   | 28.9409 | 6.06  |
| chrX | 2588502 | 2589634 | egh     | 480   | 278.312 | 17.23 |
| chrX | 2592638 | 2593630 | egh     | 683   | 22.8458 | 4.99  |
| chrX | 2633910 | 2635003 | sgg     | 484   | 47.7951 | 7.30  |
| chrX | 2635935 | 2636375 | sgg     | 1233  | 16.7357 | 4.47  |
| chrX | 2636948 | 2637309 | sgg     | 276   | 29.2914 | 5.36  |
| chrX | 2642296 | 2643921 | sgg     | 76    | 316.742 | 40.24 |
| chrX | 2645673 | 2646869 | sgg     | 497   | 273.117 | 17.61 |
| chrX | 2647196 | 2647558 | sgg     | 734   | 36.7831 | 6.67  |
| chrX | 2652512 | 2652818 | sgg     | 6028  | 24.8157 | 5.54  |
| chrX | 2658275 | 2659008 | sgg     | 114   | 316.742 | 26.74 |
| chrX | 2684630 | 2686204 | per     | 67    | 316.742 | 29.70 |
| chrX | 2687277 | 2687621 | per     | 1879  | 24.2657 | 5.41  |
| chrX | 2694109 | 2694557 | CG2650  | 413   | 29.7702 | 6.16  |
| chrX | 2703704 | 2704005 | Csat    | 14    | 15.1847 | 4.15  |
| chrX | 2741943 | 2742942 | Syx4    | 707   | 145.827 | 14.04 |
| chrX | 2743391 | 2744899 | Syx4    | 268   | 288.637 | 25.48 |
| chrX | 2786522 | 2787664 | CG32795 | 2040  | 30.703  | 4.64  |
| chrX | 2789588 | 2793248 | CG32795 | 190   | 316.742 | 10.55 |
| chrX | 2795944 | 2796788 | w       | 24    | 136.694 | 7.18  |
| chrX | 3099006 | 3099706 | kirre   | 256   | 189.62  | 17.60 |
| chrX | 3134660 | 3135933 | N       | 248   | 81.8273 | 10.02 |
| chrX | 3136336 | 3136813 | N       | 1736  | 90.6608 | 12.22 |
| chrX | 3161866 | 3163305 | CG18508 | 10201 | 273.984 | 19.88 |
| chrX | 3175956 | 3176621 | dnc     | 154   | 316.742 | 25.31 |
| chrX | 3189747 | 3190022 | dnc     | 13412 | 17.4341 | 4.57  |
| chrX | 3190750 | 3191397 | dnc     | 14505 | 83.9855 | 10.43 |
| chrX | 3206031 | 3206434 | dnc     | 29829 | 22.5747 | 5.26  |
| chrX | 3288317 | 3289638 | dnc     | 53    | 196.021 | 17.85 |
| chrX | 3294573 | 3295807 | dnc     | 329   | 109.096 | 11.37 |
| chrX | 3297964 | 3298320 | dnc     | 2886  | 27.6526 | 5.75  |
| chrX | 3332519 | 3332964 | dnc     | 1107  | 65.6671 | 9.93  |
| chrX | 3369534 | 3369855 | CR44999 | 3469  | 16.68   | 4.23  |
| chrX | 3369534 | 3369855 | Myc     | 3469  | 16.68   | 4.23  |
| chrX | 3372706 | 3373436 | CR44999 | 64    | 316.742 | 22.51 |
| chrX | 3372706 | 3373436 | Myc     | 64    | 316.742 | 22.51 |
| chrX | 3376554 | 3376994 | CR44999 | 3595  | 17.8021 | 4.58  |
| chrX | 3376554 | 3376994 | Myc     | 3595  | 17.8021 | 4.58  |
| chrX | 3377336 | 3378124 | CR44999 | 4708  | 312.351 | 20.05 |
| chrX | 3377336 | 3378124 | Myc     | 4708  | 312.351 | 20.05 |
| chrX | 3379304 | 3379813 | CR44999 | 6446  | 40.4411 | 7.28  |
| chrX | 3379304 | 3379813 | Myc     | 6446  | 40.4411 | 7.28  |
| chrX | 3381397 | 3382685 | CR44999 | 9129  | 241.091 | 19.26 |
| chrX | 3381397 | 3382685 | Myc     | 9129  | 241.091 | 19.26 |
| chrX | 3427536 | 3427968 | CG14269 | 8150  | 14.9061 | 4.15  |
| chrX | 3433732 | 3434116 | CG14269 | 1902  | 15.3684 | 4.27  |
| chrX | 3440730 | 3441389 | CG12535 | 1076  | 17.8883 | 4.06  |
| chrX | 3446146 | 3446602 | CG12535 | 1190  | 13.3263 | 3.95  |
| chrX | 3451172 | 3451667 | CG12535 | 2526  | 191.432 | 14.81 |
| chrX | 3452152 | 3452605 | CG12535 | 3434  | 34.8887 | 6.75  |
| chrX | 3482277 | 3482567 | CG10804 | 127   | 27.8127 | 5.07  |
| chrX | 3545941 | 3546715 | MRE16   | 360   | 164.093 | 13.78 |
| chrX | 3570355 | 3570676 | ppk8    | 1000  | 13.5986 | 3.49  |
| chrX | 3672016 | 3673059 | Mnt     | 486   | 316.742 | 29.77 |
| chrX | 3673604 | 3674271 | Mnt     | 2185  | 220.417 | 15.81 |
| chrX | 3675578 | 3675999 | Mnt     | 3990  | 95.1045 | 9.91  |



|      |         |         |           |       |         |       |
|------|---------|---------|-----------|-------|---------|-------|
| chrX | 3676573 | 3678815 | Mnt       | 5903  | 316.742 | 42.65 |
| chrX | 3679470 | 3680988 | Mnt       | 8049  | 92.6302 | 11.23 |
| chrX | 3681594 | 3683002 | Mnt       | 5553  | 275.136 | 18.55 |
| chrX | 3684828 | 3685939 | Mnt       | 3142  | 40.0501 | 5.89  |
| chrX | 3686705 | 3689566 | Mnt       | 89    | 316.742 | 34.29 |
| chrX | 3691287 | 3692758 | Mnt       | 3129  | 204.391 | 18.29 |
| chrX | 3694067 | 3696084 | Mnt       | 6304  | 316.742 | 32.03 |
| chrX | 3696781 | 3697302 | CR45102   | 4802  | 104.777 | 12.16 |
| chrX | 3718486 | 3720912 | Rala      | 849   | 316.742 | 38.41 |
| chrX | 3718486 | 3720912 | Tlk       | 1220  | 316.742 | 38.41 |
| chrX | 3722942 | 3723464 | Tlk       | 1418  | 291.842 | 19.91 |
| chrX | 3740582 | 3741378 | Tlk       | 986   | 316.742 | 44.89 |
| chrX | 3741732 | 3745156 | Tlk       | 4750  | 316.742 | 26.11 |
| chrX | 3747134 | 3747483 | Tlk       | 208   | 10.2392 | 3.18  |
| chrX | 3747954 | 3748265 | Tlk       | 925   | 10.5226 | 3.35  |
| chrX | 3748530 | 3749303 | Tlk       | 67    | 316.742 | 39.03 |
| chrX | 3750104 | 3750411 | Tlk       | 1157  | 10.9134 | 3.58  |
| chrX | 3761207 | 3761646 | Tlk       | 11162 | 20.5555 | 4.78  |
| chrX | 3772765 | 3773887 | Tlk       | 669   | 127.747 | 12.45 |
| chrX | 3775729 | 3781351 | Tlk       | 4280  | 316.742 | 34.57 |
| chrX | 3775729 | 3781351 | mir-4962  | 2957  | 316.742 | 34.57 |
| chrX | 3775729 | 3781351 | Tlk       | 196   | 316.742 | 34.57 |
| chrX | 3811243 | 3812244 | ec        | 59    | 291.888 | 21.24 |
| chrX | 3835170 | 3836434 | ec        | 475   | 316.742 | 30.41 |
| chrX | 3841075 | 3841524 | ec        | 4634  | 36.7705 | 6.47  |
| chrX | 3845352 | 3846160 | ec        | 100   | 316.742 | 29.99 |
| chrX | 3861135 | 3861505 | roX1      | 744   | 32.1681 | 6.13  |
| chrX | 3866152 | 3866992 | yin       | 246   | 264.203 | 22.14 |
| chrX | 3868154 | 3869066 | yin       | 240   | 219.964 | 20.02 |
| chrX | 3868154 | 3869066 | CG2930    | 401   | 219.964 | 20.02 |
| chrX | 3872270 | 3872598 | CG2930    | 23    | 18.3275 | 4.63  |
| chrX | 3880676 | 3881006 | VhaAC39-1 | 37    | 12.493  | 3.50  |
| chrX | 3930764 | 3931164 | CG42541   | 444   | 16.9306 | 4.44  |
| chrX | 3949025 | 3950336 | Vap-33A   | 593   | 180.962 | 16.22 |
| chrX | 4105833 | 4106703 | cib       | 22    | 58.8156 | 7.68  |
| chrX | 4107201 | 4107668 | cib       | 637   | 15.6041 | 3.65  |
| chrX | 4116949 | 4117491 | Tip60     | 166   | 18.1042 | 3.66  |
| chrX | 4116949 | 4117491 | tyf       | 96    | 18.1042 | 3.66  |
| chrX | 4116949 | 4117491 | Tip60     | 327   | 18.1042 | 3.66  |
| chrX | 4169906 | 4170232 | Fas2      | 35996 | 11.4567 | 3.42  |
| chrX | 4203773 | 4204331 | Fas2      | 1966  | 103.027 | 13.25 |
| chrX | 4205416 | 4206272 | Fas2      | 88    | 235.503 | 17.73 |
| chrX | 4322520 | 4323190 | norpA     | 25    | 11.4471 | 2.88  |
| chrX | 4323802 | 4324182 | norpA     | 447   | 23.2357 | 5.16  |
| chrX | 4324472 | 4325635 | norpA     | 1266  | 316.742 | 30.75 |
| chrX | 4411199 | 4411964 | bi        | 1275  | 272.363 | 21.48 |
| chrX | 4412601 | 4413306 | bi        | 76    | 17.4341 | 4.57  |
| chrX | 4423809 | 4425575 | bi        | 2006  | 212.096 | 16.69 |
| chrX | 4426526 | 4427360 | bi        | 153   | 316.742 | 37.08 |
| chrX | 4438527 | 4440172 | bi        | 12295 | 13.319  | 3.48  |
| chrX | 4444748 | 4445161 | bi        | 17816 | 13.7183 | 3.67  |
| chrX | 4508116 | 4508378 | CG3556    | 21963 | 14.5571 | 3.93  |
| chrX | 4589744 | 4590545 | CG12684   | 18369 | 34.0192 | 6.65  |
| chrX | 4596399 | 4597028 | CR32773   | 14728 | 129.272 | 14.74 |
| chrX | 4617202 | 4617774 | peb       | 71    | 305.101 | 27.61 |
| chrX | 4667005 | 4667334 | CG3009    | 474   | 22.8209 | 4.56  |
| chrX | 4678216 | 4679561 | rap       | 527   | 203.752 | 16.78 |
| chrX | 4684247 | 4686964 | Pp2C1     | 2400  | 298.065 | 17.32 |
| chrX | 4687950 | 4688491 | ctp       | 59    | 63.3289 | 7.60  |
| chrX | 4689690 | 4690069 | ctp       | 1750  | 12.5816 | 3.69  |
| chrX | 4690833 | 4691279 | ctp       | 2840  | 24.1197 | 5.46  |
| chrX | 4694053 | 4694394 | ctp       | 6026  | 15.8482 | 4.24  |
| chrX | 4702392 | 4702808 | l(1)G0334 | 484   | 5.20293 | 2.20  |
| chrX | 4702847 | 4703235 | l(1)G0334 | 795   | 7.56884 | 2.51  |
| chrX | 4707645 | 4707916 | Proc-R    | 140   | 13.0509 | 3.25  |
| chrX | 4840660 | 4840914 | CG42594   | 54    | 13.3929 | 3.97  |
| chrX | 4908856 | 4909413 | CG32772   | 52    | 36.3765 | 6.58  |
| chrX | 4909885 | 4911044 | CG32772   | 1395  | 93.9849 | 10.88 |
| chrX | 4918207 | 4920042 | CG4041    | 1401  | 39.4599 | 6.00  |
| chrX | 4918207 | 4920042 | CG6903    | 977   | 39.4599 | 6.00  |
| chrX | 4930007 | 4930830 | CG44774   | 527   | 25.4777 | 5.34  |
| chrX | 4936149 | 4936533 | CG44774   | 198   | 30.8834 | 5.68  |
| chrX | 4937183 | 4938131 | CG44774   | 493   | 74.2808 | 8.51  |
| chrX | 4939106 | 4940625 | Ptp4E     | 815   | 101.245 | 10.01 |
| chrX | 4956021 | 4956463 | CG15468   | 4957  | 11.9329 | 3.23  |

|      |         |         |                    |       |         |       |
|------|---------|---------|--------------------|-------|---------|-------|
| chrX | 5044835 | 5045175 | ovo                | 3254  | 12.1308 | 3.77  |
| chrX | 5045619 | 5045944 | ovo                | 2581  | 8.62644 | 3.18  |
| chrX | 5046270 | 5048458 | ovo                | 258   | 316.742 | 39.45 |
| chrX | 5052789 | 5053236 | ovo                | 4753  | 65.4457 | 9.49  |
| chrX | 5055129 | 5055447 | ovo                | 7031  | 22.5747 | 5.26  |
| chrX | 5056190 | 5056885 | ovo                | 7568  | 13.9887 | 3.73  |
| chrX | 5063314 | 5063906 | ovo                | 332   | 15.163  | 3.82  |
| chrX | 5063314 | 5063906 | CR44833            | 357   | 15.163  | 3.82  |
| chrX | 5081891 | 5083158 | CG32767            | 251   | 46.0209 | 6.11  |
| chrX | 5083424 | 5084817 | CG32767            | 301   | 85.0153 | 9.24  |
| chrX | 5085155 | 5087670 | rg                 | 828   | 316.742 | 31.23 |
| chrX | 5085155 | 5087670 | CG15465            | 828   | 316.742 | 31.23 |
| chrX | 5085155 | 5087670 | rg                 | 828   | 316.742 | 31.23 |
| chrX | 5164255 | 5164586 | CG15465            | 937   | 21.0625 | 5.07  |
| chrX | 5164255 | 5164586 | rg                 | 937   | 21.0625 | 5.07  |
| chrX | 5164850 | 5165362 | CG15465            | 172   | 12.7942 | 3.57  |
| chrX | 5164850 | 5165362 | rg                 | 172   | 12.7942 | 3.57  |
| chrX | 5279257 | 5279520 | CG42749            | 16704 | 14.0411 | 4.07  |
| chrX | 5294215 | 5294636 | CG42749            | 1714  | 18.1418 | 4.67  |
| chrX | 5311931 | 5312344 | dhd                | 58    | 11.6566 | 3.22  |
| chrX | 5322499 | 5322801 | Rnp4F              | 92    | 9.7279  | 2.89  |
| chrX | 5332477 | 5332979 | CanB               | 28    | 70.7112 | 10.38 |
| chrX | 5339994 | 5340443 | SK                 | 67    | 73.0528 | 10.63 |
| chrX | 5363142 | 5363519 | SK                 | 1878  | 24.9044 | 5.56  |
| chrX | 5363971 | 5364444 | SK                 | 959   | 66.4907 | 9.34  |
| chrX | 5410624 | 5411381 | NAAT1              | 25    | 35.3264 | 6.54  |
| chrX | 5417831 | 5419288 | spoon              | 451   | 225.448 | 16.86 |
| chrX | 5419601 | 5420031 | spoon              | 538   | 23.4903 | 5.14  |
| chrX | 5420577 | 5420967 | spoon              | 30    | 12.2653 | 3.13  |
| chrX | 5428221 | 5428706 | CR45517            | 43    | 129.272 | 14.74 |
| chrX | 5429881 | 5430780 | CG15784            | 93    | 215.362 | 18.72 |
| chrX | 5432822 | 5433499 | CR44471            | 196   | 52.0185 | 7.36  |
| chrX | 5515287 | 5516142 | CG12730            | 931   | 39.4994 | 6.16  |
| chrX | 5516450 | 5518645 | CG12730            | 60    | 316.742 | 46.44 |
| chrX | 5516450 | 5518645 | CR45518            | 302   | 316.742 | 46.44 |
| chrX | 5524454 | 5524705 | snoRNA:Psi28S-3342 | 148   | 9.54155 | 3.16  |
| chrX | 5560373 | 5561127 | Vsx2               | 535   | 212.561 | 17.67 |
| chrX | 5593784 | 5594417 | Vsx1               | 211   | 131.69  | 14.32 |
| chrX | 5621949 | 5622692 | mir-3645           | 293   | 15.3558 | 3.70  |
| chrX | 5621949 | 5622692 | Mlc-c              | 416   | 15.3558 | 3.70  |
| chrX | 5621949 | 5622692 | I(1)G0045          | 524   | 15.3558 | 3.70  |
| chrX | 5636518 | 5637160 | CG42492            | 851   | 88.9279 | 11.69 |
| chrX | 5637446 | 5638063 | CG42492            | 185   | 132.91  | 15.02 |
| chrX | 5648336 | 5648710 | CG42492            | 6     | 14.4387 | 3.51  |
| chrX | 5649339 | 5649658 | CG42492            | 981   | 21.0625 | 5.07  |
| chrX | 5649959 | 5650482 | CG42492            | 1734  | 42.3588 | 7.28  |
| chrX | 5661997 | 5663172 | CG42265            | 491   | 70.9218 | 10.43 |
| chrX | 5661997 | 5663172 | CR45520            | 743   | 70.9218 | 10.43 |
| chrX | 5664126 | 5664629 | CR45520            | 1278  | 114.368 | 13.22 |
| chrX | 5666048 | 5666314 | CG4119             | 54    | 5.71079 | 2.35  |
| chrX | 5671570 | 5671890 | Rab18              | 51    | 13.3929 | 3.97  |
| chrX | 5672470 | 5672793 | RpL35              | 30    | 13.0535 | 3.52  |
| chrX | 5679766 | 5680121 | Tre1               | 8     | 30.3398 | 5.21  |
| chrX | 5689912 | 5691282 | cv                 | 58    | 78.7418 | 9.67  |
| chrX | 5689912 | 5691282 | CR45525            | 795   | 78.7418 | 9.67  |
| chrX | 5696447 | 5696844 | CR42794            | 429   | 24.1197 | 5.46  |
| chrX | 5698390 | 5698778 | CG4096             | 20    | 23.2633 | 5.00  |
| chrX | 5705061 | 5706491 | CG4096             | 6960  | 69.606  | 10.13 |
| chrX | 5715399 | 5716256 | CG33080            | 145   | 16.0203 | 4.14  |
| chrX | 5717663 | 5718007 | CG33080            | 57    | 31.0588 | 6.16  |
| chrX | 5724245 | 5724792 | CG32758            | 953   | 23.4066 | 4.74  |
| chrX | 5734907 | 5735861 | CG15773            | 2987  | 22.2306 | 5.09  |
| chrX | 5737147 | 5738181 | CG32758            | 650   | 68.1853 | 9.33  |
| chrX | 5744269 | 5744698 | IntS6              | 1862  | 58.0488 | 7.55  |
| chrX | 5745120 | 5747456 | IntS6              | 287   | 316.742 | 34.44 |
| chrX | 5754906 | 5756478 | lin-52             | 320   | 316.742 | 34.64 |
| chrX | 5754906 | 5756478 | CG15771            | 295   | 316.742 | 34.64 |
| chrX | 5763303 | 5764146 | MAPk-Ak2           | 281   | 14.1426 | 3.41  |
| chrX | 5770708 | 5771131 | CG3097             | 131   | 58.958  | 7.62  |
| chrX | 5818425 | 5818833 | CG15765            | 42    | 24.1197 | 5.46  |
| chrX | 5879812 | 5880959 | CG16721            | 273   | 23.8345 | 4.30  |
| chrX | 5885432 | 5887357 | CG16721            | 6195  | 316.742 | 29.84 |
| chrX | 5895874 | 5896497 | CR45668            | 3873  | 29.0751 | 5.54  |
| chrX | 5899164 | 5901179 | CR45668            | 20    | 316.742 | 27.82 |
| chrX | 5899164 | 5901179 | Act5C              | 851   | 316.742 | 27.82 |

|      |         |         |            |       |         |       |
|------|---------|---------|------------|-------|---------|-------|
| chrX | 5901463 | 5902439 | Act5C      | 173   | 316.742 | 31.62 |
| chrX | 5904186 | 5904988 | CG4020     | 1218  | 279.742 | 20.62 |
| chrX | 5908032 | 5908474 | CG12236    | 45    | 8.97238 | 2.96  |
| chrX | 5912181 | 5912532 | CR44108    | 2057  | 19.2591 | 4.48  |
| chrX | 5916070 | 5916508 | CG3011     | 23    | 14.0872 | 3.54  |
| chrX | 5916852 | 5917396 | CG3726     | 24    | 87.4049 | 8.83  |
| chrX | 5918474 | 5919312 | CG3726     | 1649  | 316.742 | 26.03 |
| chrX | 5935088 | 5935465 | CG12728    | 7250  | 18.1418 | 4.67  |
| chrX | 5987720 | 5988995 | CG5966     | 434   | 158.042 | 16.28 |
| chrX | 5992237 | 5992491 | CG5966     | 3578  | 25.7773 | 5.09  |
| chrX | 6000539 | 6001920 | CG4766     | 501   | 266.366 | 24.55 |
| chrX | 6000539 | 6001920 | CR44498    | 212   | 266.366 | 24.55 |
| chrX | 6012990 | 6013800 | mab-21     | 181   | 316.742 | 23.30 |
| chrX | 6012990 | 6013800 | CR44499    | 345   | 316.742 | 23.30 |
| chrX | 6037194 | 6037467 | rux        | 56    | 8.56807 | 2.69  |
| chrX | 6050762 | 6051342 | CG5921     | 227   | 17.019  | 4.24  |
| chrX | 6068850 | 6069210 | CG5928     | 1093  | 34.0192 | 6.65  |
| chrX | 6075020 | 6075339 | Tsp5D      | 307   | 21.8144 | 5.16  |
| chrX | 6077154 | 6077645 | CG4666     | 71    | 53.476  | 8.49  |
| chrX | 6081264 | 6081681 | CG4660     | 105   | 21.8144 | 5.16  |
| chrX | 6089602 | 6090138 | CR44959    | 29    | 46.579  | 6.41  |
| chrX | 6093740 | 6094076 | Nep1       | 63    | 28.0546 | 5.49  |
| chrX | 6193229 | 6193914 | Ca-alpha1T | 1074  | 28.5455 | 5.43  |
| chrX | 6219901 | 6220467 | Efr        | 122   | 66.905  | 7.18  |
| chrX | 6224189 | 6225065 | sqh        | 60    | 139.122 | 11.70 |
| chrX | 6225505 | 6226053 | CG14446    | 49    | 23.7856 | 4.62  |
| chrX | 6254433 | 6254824 | Rbcn-3A    | 945   | 14.0411 | 4.07  |
| chrX | 6262986 | 6263240 | CG3781     | 1933  | 23.3834 | 5.11  |
| chrX | 6266116 | 6266446 | schlank    | 969   | 16.9573 | 4.23  |
| chrX | 6267714 | 6268566 | Spt6       | 112   | 15.3558 | 3.70  |
| chrX | 6278899 | 6279873 | Ubi-p5E    | 144   | 316.742 | 26.66 |
| chrX | 6278899 | 6279873 | CR45530    | 261   | 316.742 | 26.66 |
| chrX | 6281971 | 6282433 | CG11700    | 1320  | 74.1242 | 10.73 |
| chrX | 6283381 | 6283880 | CG11700    | 69    | 119.156 | 12.17 |
| chrX | 6287764 | 6288237 | Top3beta   | 18    | 11.2818 | 3.18  |
| chrX | 6287764 | 6288237 | wuho       | 91    | 11.2818 | 3.18  |
| chrX | 6317091 | 6318038 | CG15894    | 106   | 46.695  | 7.91  |
| chrX | 6330124 | 6331167 | CG42240    | 25    | 316.742 | 31.30 |
| chrX | 6331554 | 6332303 | CG42240    | 1299  | 17.9731 | 4.13  |
| chrX | 6332974 | 6333413 | CG42240    | 2314  | 86.7176 | 11.50 |
| chrX | 6338737 | 6341365 | CG3842     | 445   | 172.404 | 17.17 |
| chrX | 6341710 | 6342289 | CG3842     | 855   | 108.127 | 13.27 |
| chrX | 6343638 | 6345038 | CG3847     | 3092  | 316.742 | 24.42 |
| chrX | 6346879 | 6347505 | CG3847     | 107   | 39.6833 | 6.35  |
| chrX | 6351949 | 6353571 | kdn        | 863   | 103.483 | 11.92 |
| chrX | 6354160 | 6354481 | kdn        | 2044  | 31.3542 | 6.13  |
| chrX | 6357519 | 6357789 | kdn        | 5393  | 12.7565 | 3.87  |
| chrX | 6365918 | 6366462 | Marf       | 264   | 25.9686 | 4.56  |
| chrX | 6524229 | 6524730 | CG42340    | 60    | 12.1138 | 3.32  |
| chrX | 6524229 | 6524730 | CG3918     | 80    | 12.1138 | 3.32  |
| chrX | 6533964 | 6534625 | dx         | 279   | 293.118 | 20.61 |
| chrX | 6543907 | 6544232 | CG34417    | 2069  | 14.0411 | 4.07  |
| chrX | 6545999 | 6546313 | CG34417    | 51    | 14.2507 | 4.05  |
| chrX | 6547263 | 6547545 | CG34417    | 1224  | 11.9203 | 3.42  |
| chrX | 6549415 | 6550095 | CG34417    | 3501  | 135.281 | 14.58 |
| chrX | 6550757 | 6551241 | CG34417    | 4891  | 139.687 | 16.29 |
| chrX | 6590788 | 6591221 | Pat1       | 285   | 11.9854 | 3.33  |
| chrX | 6599158 | 6599513 | pigs       | 733   | 26.5212 | 5.17  |
| chrX | 6599794 | 6600280 | pigs       | 58    | 148.392 | 13.73 |
| chrX | 6601383 | 6602518 | pigs       | 35    | 22.2685 | 4.94  |
| chrX | 6618847 | 6619265 | CG14443    | 14983 | 14.9468 | 4.09  |
| chrX | 6624052 | 6624525 | CG14443    | 9715  | 53.14   | 7.86  |
| chrX | 6643156 | 6643414 | CR44817    | 6145  | 16.6919 | 3.98  |
| chrX | 6654583 | 6654893 | Cdc7       | 52    | 12.1882 | 3.33  |
| chrX | 6656022 | 6657539 | Cdc7       | 2646  | 58.7989 | 8.57  |
| chrX | 6661627 | 6662815 | Ctr1A      | 947   | 36.4947 | 5.83  |
| chrX | 6668999 | 6669377 | CG3198     | 4775  | 54.498  | 8.84  |
| chrX | 6678135 | 6678926 | ND-ASHI    | 550   | 10.8116 | 3.42  |
| chrX | 6678135 | 6678926 | l(1)G0255  | 387   | 10.8116 | 3.42  |
| chrX | 6679415 | 6679717 | l(1)G0255  | 85    | 18.1418 | 4.67  |
| chrX | 6683845 | 6684466 | Pink1      | 57    | 23.8527 | 4.83  |
| chrX | 6694041 | 6694721 | CG14442    | 787   | 72.9111 | 8.83  |
| chrX | 6698093 | 6698607 | CG14440    | 219   | 44.1161 | 6.68  |
| chrX | 6699150 | 6700894 | CG14441    | 1078  | 316.742 | 24.71 |
| chrX | 6702582 | 6703067 | CG14441    | 3300  | 33.0785 | 5.43  |

|      |         |         |                    |       |         |       |
|------|---------|---------|--------------------|-------|---------|-------|
| chrX | 6703528 | 6703998 | CG14441            | 4208  | 35.6367 | 5.61  |
| chrX | 6706795 | 6707270 | CG14441            | 2029  | 37.5924 | 6.55  |
| chrX | 6707916 | 6709672 | CG14441            | 946   | 140.27  | 13.85 |
| chrX | 6711323 | 6711727 | CG14441            | 2313  | 13.3929 | 3.97  |
| chrX | 6726991 | 6727481 | CG3168             | 35    | 20.9195 | 4.63  |
| chrX | 6743595 | 6744298 | snoRNA:Psi28S-1232 | 375   | 11.9203 | 3.42  |
| chrX | 6743595 | 6744298 | RpL17              | 19    | 11.9203 | 3.42  |
| chrX | 6747054 | 6747861 | CG14439            | 217   | 89.7324 | 11.44 |
| chrX | 6749651 | 6750254 | CR44964            | 1791  | 14.3186 | 3.81  |
| chrX | 6751623 | 6752019 | CR44964            | 3795  | 14.9277 | 4.16  |
| chrX | 6756365 | 6756807 | CG14438            | 228   | 26.9291 | 4.61  |
| chrX | 6757288 | 6757553 | CG14438            | 1047  | 16.6813 | 4.30  |
| chrX | 6779556 | 6780296 | shf                | 428   | 143.965 | 15.85 |
| chrX | 6791103 | 6792167 | C3G                | 548   | 316.742 | 24.64 |
| chrX | 6793501 | 6793848 | C3G                | 1689  | 22.4872 | 5.07  |
| chrX | 6800305 | 6801243 | C3G                | 231   | 180.708 | 17.03 |
| chrX | 6802790 | 6805168 | C3G                | 1142  | 316.742 | 25.28 |
| chrX | 6802790 | 6805168 | pod1               | 249   | 316.742 | 25.28 |
| chrX | 6805571 | 6805847 | pod1               | 313   | 15.9289 | 4.05  |
| chrX | 6853413 | 6853834 | CG14434            | 746   | 23.7415 | 5.28  |
| chrX | 6855641 | 6856107 | CG14434            | 2913  | 35.2967 | 6.25  |
| chrX | 6860135 | 6860955 | CR45531            | 34    | 121.927 | 10.76 |
| chrX | 6861324 | 6862025 | CR45531            | 1302  | 296.002 | 25.77 |
| chrX | 6862405 | 6863324 | CG43736            | 985   | 68.7154 | 8.05  |
| chrX | 6865132 | 6865481 | CG43736            | 1178  | 18.2469 | 4.46  |
| chrX | 6865959 | 6866489 | CG14434            | 957   | 58.2813 | 8.81  |
| chrX | 6867083 | 6867641 | CG14434            | 208   | 29.5442 | 4.47  |
| chrX | 6867927 | 6868922 | CG43736            | 24    | 316.742 | 28.52 |
| chrX | 6871771 | 6872070 | CG43736            | 3407  | 18.5016 | 4.60  |
| chrX | 6874992 | 6875411 | CG43736            | 736   | 19.929  | 4.12  |
| chrX | 6875782 | 6876210 | CG43736            | 13    | 85.0153 | 9.24  |
| chrX | 6969395 | 6969907 | CG4586             | 319   | 30.6062 | 6.26  |
| chrX | 6980847 | 6982188 | ogre               | 110   | 316.742 | 45.45 |
| chrX | 6985518 | 6987882 | ogre               | 1640  | 197.308 | 17.93 |
| chrX | 6985518 | 6987882 | bou                | 823   | 197.308 | 17.93 |
| chrX | 6997265 | 6997867 | CR43837            | 390   | 10.9134 | 3.58  |
| chrX | 6998247 | 6999121 | lnx2               | 54    | 316.742 | 46.09 |
| chrX | 7000432 | 7000803 | lnx2               | 1948  | 44.3195 | 7.39  |
| chrX | 7008065 | 7009086 | cm                 | 2531  | 24.1043 | 5.28  |
| chrX | 7068232 | 7068496 | CG4607             | 1073  | 8.98509 | 2.97  |
| chrX | 7068894 | 7069612 | CG4607             | 255   | 122.809 | 14.19 |
| chrX | 7095221 | 7095535 | Sxl                | 1730  | 10.029  | 3.08  |
| chrX | 7095819 | 7096393 | Sxl                | 970   | 46.5283 | 6.96  |
| chrX | 7096745 | 7098258 | Sxl                | 236   | 295.804 | 20.74 |
| chrX | 7101339 | 7102395 | CG4615             | 225   | 29.7942 | 5.31  |
| chrX | 7109667 | 7110432 | fz4                | 362   | 68.3494 | 10.13 |
| chrX | 7110863 | 7111219 | fz4                | 661   | 16.2826 | 4.21  |
| chrX | 7193787 | 7194332 | CG9650             | 1908  | 113.936 | 14.20 |
| chrX | 7194598 | 7195051 | CG9650             | 1339  | 11.516  | 3.68  |
| chrX | 7195868 | 7196514 | CG9650             | 154   | 116.334 | 14.40 |
| chrX | 7204019 | 7205336 | CG9650             | 8920  | 139.687 | 16.29 |
| chrX | 7242060 | 7242415 | CG9650             | 15849 | 14.7    | 4.17  |
| chrX | 7285280 | 7286893 | CG1677             | 642   | 238.93  | 23.64 |
| chrX | 7285280 | 7286893 | CG2059             | 804   | 238.93  | 23.64 |
| chrX | 7293474 | 7294190 | unc-119            | 2748  | 11.516  | 3.68  |
| chrX | 7299523 | 7302270 | brk                | 8035  | 316.742 | 33.98 |
| chrX | 7305695 | 7308362 | brk                | 235   | 316.742 | 33.47 |
| chrX | 7317263 | 7317638 | Atg5               | 6327  | 40.027  | 6.87  |
| chrX | 7324196 | 7325034 | Dok                | 336   | 23.1117 | 4.38  |
| chrX | 7445022 | 7445398 | CR45533            | 145   | 35.7647 | 6.85  |
| chrX | 7604363 | 7605107 | ct                 | 4389  | 316.742 | 25.99 |
| chrX | 7605653 | 7606099 | ct                 | 3216  | 26.0188 | 5.38  |
| chrX | 7607855 | 7608685 | ct                 | 841   | 316.742 | 27.62 |
| chrX | 7626611 | 7627694 | ct                 | 5070  | 316.742 | 32.82 |
| chrX | 7690677 | 7693542 | CHES-1-like        | 2241  | 316.742 | 32.07 |
| chrX | 7694184 | 7696146 | CHES-1-like        | 196   | 316.742 | 28.46 |
| chrX | 7696498 | 7697716 | CHES-1-like        | 118   | 316.742 | 38.59 |
| chrX | 7698569 | 7698985 | CHES-1-like        | 2089  | 68.7592 | 7.58  |
| chrX | 7702434 | 7703099 | CHES-1-like        | 2201  | 316.742 | 49.76 |
| chrX | 7703396 | 7703848 | CHES-1-like        | 1374  | 90.6624 | 10.86 |
| chrX | 7704853 | 7707534 | CHES-1-like        | 346   | 316.742 | 25.43 |
| chrX | 7709172 | 7710343 | CHES-1-like        | 113   | 316.742 | 21.12 |
| chrX | 7728712 | 7729141 | CG12155            | 190   | 30.5821 | 5.54  |
| chrX | 7901093 | 7901418 | snoRNA:Or-aca2     | 104   | 18.0266 | 4.41  |
| chrX | 7901093 | 7901418 | RpS6               | 24    | 18.0266 | 4.41  |

|      |         |         |           |       |         |       |
|------|---------|---------|-----------|-------|---------|-------|
| chrX | 7907664 | 7908173 | dpr14     | 253   | 18.4273 | 4.36  |
| chrX | 7908627 | 7909151 | CG1444    | 120   | 14.1627 | 3.66  |
| chrX | 7912112 | 7912417 | snz       | 51    | 7.30252 | 2.68  |
| chrX | 7920388 | 7920786 | Ykt6      | 54    | 10.5982 | 3.21  |
| chrX | 7930067 | 7931487 | CG10777   | 727   | 316.742 | 47.86 |
| chrX | 7933039 | 7933922 | CG10778   | 38    | 10.3591 | 3.02  |
| chrX | 7933039 | 7933922 | RpS14a    | 447   | 10.3591 | 3.02  |
| chrX | 7935787 | 7936306 | Ubr3      | 102   | 12.3183 | 3.51  |
| chrX | 7937537 | 7938985 | Ubr3      | 2742  | 256.108 | 20.58 |
| chrX | 7944405 | 7945631 | l(1)G0193 | 466   | 316.742 | 22.61 |
| chrX | 7946735 | 7947334 | l(1)G0193 | 136   | 101.273 | 10.20 |
| chrX | 7959081 | 7959595 | CR45620   | 85    | 19.5844 | 4.87  |
| chrX | 7959081 | 7959595 | sws       | 181   | 19.5844 | 4.87  |
| chrX | 7967111 | 7968389 | sws       | 366   | 231.883 | 18.75 |
| chrX | 7969457 | 7969962 | sn        | 19    | 95.2615 | 10.54 |
| chrX | 7970978 | 7971237 | sn        | 1405  | 8.99161 | 3.17  |
| chrX | 7995384 | 7995784 | Tbh       | 130   | 30.5289 | 5.95  |
| chrX | 8049323 | 8049597 | fs(1)h    | 6665  | 14.0411 | 4.07  |
| chrX | 8056236 | 8059297 | fs(1)h    | 394   | 316.742 | 30.77 |
| chrX | 8059700 | 8062621 | fs(1)h    | 174   | 316.742 | 44.11 |
| chrX | 8059700 | 8062621 | mys       | 496   | 316.742 | 44.11 |
| chrX | 8063075 | 8063554 | mys       | 1628  | 55.9369 | 8.00  |
| chrX | 8081266 | 8082667 | CG2254    | 26    | 29.0751 | 5.54  |
| chrX | 8090449 | 8093967 | UbcE2H    | 130   | 316.742 | 31.16 |
| chrX | 8099888 | 8100586 | CG2258    | 304   | 67.7561 | 10.13 |
| chrX | 8101178 | 8101953 | CG2258    | 55    | 74.5806 | 8.30  |
| chrX | 8113817 | 8114131 | Gclc      | 2158  | 23.2431 | 4.65  |
| chrX | 8114730 | 8116255 | Gclc      | 680   | 89.7291 | 10.57 |
| chrX | 8141496 | 8142332 | Smox      | 425   | 76.8462 | 9.12  |
| chrX | 8157346 | 8157914 | Traf6     | 282   | 25.2837 | 5.47  |
| chrX | 8157346 | 8157914 | Gllspla2  | 41    | 25.2837 | 5.47  |
| chrX | 8176373 | 8177001 | slpr      | 600   | 31.08   | 5.72  |
| chrX | 8177777 | 8178216 | sdt       | 565   | 27.304  | 5.86  |
| chrX | 8178517 | 8178920 | sdt       | 132   | 21.0625 | 5.07  |
| chrX | 8192889 | 8193501 | sdt       | 36    | 204.371 | 19.57 |
| chrX | 8194376 | 8194970 | sdt       | 1539  | 110.184 | 11.44 |
| chrX | 8195890 | 8196219 | sdt       | 2869  | 30.5378 | 6.05  |
| chrX | 8196635 | 8197045 | sdt       | 3692  | 22.5308 | 4.92  |
| chrX | 8202332 | 8202898 | sdt       | 9531  | 15.3684 | 4.27  |
| chrX | 8211584 | 8211846 | sdt       | 4408  | 10.3009 | 3.19  |
| chrX | 8213909 | 8214433 | sdt       | 1972  | 117.325 | 13.82 |
| chrX | 8215862 | 8216227 | sdt       | 72    | 27.8114 | 5.52  |
| chrX | 8228816 | 8229671 | sdt       | 1123  | 11.3577 | 3.34  |
| chrX | 8230145 | 8230822 | sdt       | 163   | 310.502 | 26.27 |
| chrX | 8242363 | 8243843 | Trxr-1    | 1022  | 84.3271 | 10.37 |
| chrX | 8242363 | 8243843 | sni       | 189   | 84.3271 | 10.37 |
| chrX | 8242363 | 8243843 | Trxr-1    | 32    | 84.3271 | 10.37 |
| chrX | 8244175 | 8244517 | Trxr-1    | 66    | 7.16552 | 2.61  |
| chrX | 8271281 | 8271869 | Corp      | 207   | 95.2095 | 12.61 |
| chrX | 8275996 | 8276432 | CG15343   | 2380  | 62.8255 | 8.51  |
| chrX | 8409108 | 8412044 | Trf2      | 1283  | 316.742 | 30.20 |
| chrX | 8409108 | 8412044 | lawc      | 456   | 316.742 | 30.20 |
| chrX | 8412340 | 8413153 | lawc      | 1243  | 156.047 | 13.45 |
| chrX | 8418388 | 8418799 | Trf2      | 2754  | 58.9015 | 8.27  |
| chrX | 8419581 | 8419884 | Trf2      | 1664  | 25.7575 | 5.24  |
| chrX | 8420837 | 8421604 | Trf2      | 78    | 316.742 | 41.85 |
| chrX | 8436523 | 8436879 | CG12125   | 114   | 15.0422 | 3.64  |
| chrX | 8437147 | 8438034 | CG12125   | 85    | 46.0271 | 6.87  |
| chrX | 8464183 | 8465155 | Sptr      | 254   | 316.742 | 23.44 |
| chrX | 8510799 | 8511108 | CG33181   | 1274  | 39.3302 | 7.25  |
| chrX | 8517236 | 8518925 | Nrg       | 922   | 115.047 | 12.17 |
| chrX | 8533821 | 8534392 | PIP82     | 4405  | 171.859 | 18.77 |
| chrX | 8558670 | 8558999 | IntS4     | 47    | 20.0809 | 4.45  |
| chrX | 8560519 | 8562578 | Trf4-1    | 43    | 207.757 | 15.93 |
| chrX | 8566848 | 8567146 | CR46195   | 1839  | 16.271  | 4.28  |
| chrX | 8569002 | 8569417 | CG12111   | 1726  | 48.6506 | 8.24  |
| chrX | 8574179 | 8575108 | CG12065   | 411   | 30.7794 | 5.29  |
| chrX | 8588745 | 8589192 | CG12081   | 140   | 18.1774 | 4.30  |
| chrX | 8624671 | 8625299 | oc        | 18143 | 240.669 | 22.25 |
| chrX | 8650448 | 8651694 | oc        | 270   | 316.742 | 24.02 |
| chrX | 8656942 | 8657479 | oc        | 6584  | 54.498  | 8.84  |
| chrX | 8676618 | 8677333 | CG12772   | 137   | 73.996  | 9.56  |
| chrX | 8681439 | 8682425 | CG11284   | 548   | 82.6544 | 10.53 |
| chrX | 8709366 | 8709871 | Hexo2     | 47    | 66.189  | 9.65  |
| chrX | 8714335 | 8714735 | CG2004    | 135   | 21.9632 | 3.95  |

|      |         |         |           |       |         |       |
|------|---------|---------|-----------|-------|---------|-------|
| chrX | 8757689 | 8758223 | Lim1      | 27376 | 285.163 | 26.82 |
| chrX | 8785705 | 8786210 | Lim1      | 659   | 82.3404 | 11.13 |
| chrX | 8805585 | 8807168 | Lim1      | 946   | 287.954 | 18.77 |
| chrX | 8863720 | 8864694 | CG12075   | 56    | 110.363 | 13.91 |
| chrX | 8869963 | 8870428 | Moe       | 5829  | 129.731 | 15.49 |
| chrX | 8873829 | 8874097 | Moe       | 2066  | 9.83025 | 3.23  |
| chrX | 8877365 | 8877654 | Moe       | 413   | 8.62644 | 3.18  |
| chrX | 8888204 | 8888481 | Moe       | 3499  | 13.0212 | 3.81  |
| chrX | 8891340 | 8892173 | Moe       | 93    | 316.742 | 29.94 |
| chrX | 8893731 | 8895075 | Moe       | 443   | 131.168 | 13.94 |
| chrX | 8895683 | 8896528 | Moe       | 1826  | 21.0402 | 4.52  |
| chrX | 8897272 | 8898388 | Moe       | 78    | 59.4645 | 7.38  |
| chrX | 8903331 | 8904408 | e(r)      | 1785  | 28.119  | 5.96  |
| chrX | 8905595 | 8906208 | e(r)      | 239   | 30.5821 | 5.54  |
| chrX | 8906897 | 8907355 | rdgA      | 29    | 36.8999 | 5.63  |
| chrX | 8924588 | 8925274 | rdgA      | 213   | 142.202 | 16.49 |
| chrX | 9029747 | 9030496 | Nost      | 157   | 316.742 | 38.84 |
| chrX | 9039751 | 9040593 | Nost      | 309   | 133.276 | 14.63 |
| chrX | 9041449 | 9041738 | Nost      | 1074  | 7.0135  | 2.73  |
| chrX | 9042029 | 9042968 | Nost      | 110   | 316.742 | 70.14 |
| chrX | 9047322 | 9047654 | CR43836   | 1548  | 28.9409 | 6.06  |
| chrX | 9067707 | 9068167 | CG15365   | 4     | 74.895  | 10.62 |
| chrX | 9078278 | 9078599 | CG44325   | 66    | 15.4124 | 3.40  |
| chrX | 9089806 | 9090123 | CG7033    | 370   | 8.18818 | 2.78  |
| chrX | 9109417 | 9110924 | AP-1gamma | 25    | 218.76  | 19.16 |
| chrX | 9118679 | 9119295 | CR45539   | 1755  | 15.3684 | 4.27  |
| chrX | 9134270 | 9135220 | fend      | 19    | 43.823  | 7.50  |
| chrX | 9152157 | 9152542 | His3.3B   | 2666  | 14.7014 | 3.35  |
| chrX | 9155576 | 9156801 | His3.3B   | 260   | 76.9488 | 8.86  |
| chrX | 9163266 | 9164665 | mei-P26   | 20    | 316.742 | 27.66 |
| chrX | 9201800 | 9202058 | su(r)     | 89    | 12.7565 | 3.87  |
| chrX | 9214763 | 9215113 | Obp8a     | 11    | 19.8762 | 4.62  |
| chrX | 9247452 | 9247873 | Dsor1     | 45    | 29.4923 | 5.90  |
| chrX | 9250523 | 9250781 | CG17754   | 268   | 10.5548 | 3.15  |
| chrX | 9251167 | 9251448 | CG17754   | 921   | 16.4111 | 3.98  |
| chrX | 9251965 | 9252450 | CG17754   | 8     | 87.2863 | 11.92 |
| chrX | 9282438 | 9283309 | c11.1     | 101   | 21.1167 | 4.91  |
| chrX | 9283835 | 9284737 | lz        | 244   | 316.742 | 36.16 |
| chrX | 9305221 | 9306472 | CR44534   | 8678  | 225.331 | 17.97 |
| chrX | 9310228 | 9310521 | CR44534   | 4321  | 12.6307 | 3.77  |
| chrX | 9355519 | 9356257 | CG34449   | 494   | 62.669  | 8.69  |
| chrX | 9400208 | 9400944 | BCL7-like | 43715 | 13.3929 | 3.97  |
| chrX | 9466200 | 9467713 | CG44815   | 20309 | 291.373 | 21.44 |
| chrX | 9490925 | 9491288 | mgl       | 4752  | 18.1418 | 4.67  |
| chrX | 9495518 | 9496587 | mgl       | 54    | 316.742 | 25.98 |
| chrX | 9496932 | 9497651 | mgl       | 1134  | 230.185 | 22.59 |
| chrX | 9499853 | 9500674 | mgl       | 28    | 69.7441 | 9.08  |
| chrX | 9553259 | 9553993 | I(1)G0320 | 0     | 42.6889 | 6.05  |
| chrX | 9554522 | 9554857 | RpS28b    | 25    | 15.5019 | 3.90  |
| chrX | 9578791 | 9580112 | LPCAT     | 950   | 37.4936 | 5.03  |
| chrX | 9583364 | 9586573 | CR45541   | 1607  | 316.742 | 29.42 |
| chrX | 9583364 | 9586573 | Hex-A     | 106   | 316.742 | 29.42 |
| chrX | 9588555 | 9588850 | CR45542   | 1922  | 37.5164 | 6.54  |
| chrX | 9590249 | 9590754 | CR45542   | 92    | 22.9723 | 4.66  |
| chrX | 9595734 | 9596211 | CR45543   | 910   | 13.0388 | 3.47  |
| chrX | 9599222 | 9600692 | Gga       | 1034  | 157.615 | 12.45 |
| chrX | 9601021 | 9601611 | Gga       | 66    | 12.386  | 3.28  |
| chrX | 9608689 | 9609315 | Aats-lys  | 226   | 17.7294 | 4.41  |
| chrX | 9608689 | 9609315 | CG42797   | 165   | 17.7294 | 4.41  |
| chrX | 9638901 | 9639506 | Ptpmeg2   | 171   | 316.742 | 28.07 |
| chrX | 9640343 | 9641422 | Ptpmeg2   | 58    | 276.64  | 20.01 |
| chrX | 9646075 | 9646470 | Ptpmeg2   | 304   | 17.8958 | 4.53  |
| chrX | 9650808 | 9651307 | Ptpmeg2   | 338   | 33.0315 | 6.53  |
| chrX | 9657975 | 9658985 | Ptpmeg2   | 744   | 86.9274 | 9.95  |
| chrX | 9666452 | 9666753 | CG3106    | 3716  | 31.3452 | 6.04  |
| chrX | 9684032 | 9687228 | nej       | 194   | 316.742 | 30.42 |
| chrX | 9687812 | 9688120 | CR42657   | 251   | 30.5855 | 5.12  |
| chrX | 9692674 | 9693036 | CR44016   | 445   | 37.4225 | 6.08  |
| chrX | 9693603 | 9694351 | btd       | 209   | 316.742 | 30.80 |
| chrX | 9729011 | 9729474 | Sp1       | 421   | 25.6968 | 5.66  |
| chrX | 9778477 | 9779108 | CG1354    | 26    | 46.579  | 6.41  |
| chrX | 9864837 | 9865400 | Ser7      | 111   | 57.6177 | 7.31  |
| chrX | 9881655 | 9882001 | CG9689    | 166   | 25.6968 | 5.66  |
| chrX | 9884137 | 9884726 | CG9691    | 16    | 169.366 | 14.82 |
| chrX | 9930747 | 9931354 | ldgf4     | 96    | 316.742 | 28.62 |

|      |          |          |              |       |         |       |
|------|----------|----------|--------------|-------|---------|-------|
| chrX | 9931708  | 9932070  | ldgf4        | 994   | 19.5844 | 4.87  |
| chrX | 9964783  | 9965195  | CG1791       | 9     | 10.0834 | 3.24  |
| chrX | 9989455  | 9989838  | CG32694      | 57    | 26.3157 | 5.45  |
| chrX | 9992108  | 9992377  | CG32694      | 2526  | 12.7565 | 3.87  |
| chrX | 10071434 | 10071734 | CR45602      | 189   | 12.7565 | 3.87  |
| chrX | 10086336 | 10086797 | RhoU         | 49    | 14.4387 | 3.51  |
| chrX | 10209591 | 10210024 | CG15309      | 96    | 57.513  | 8.65  |
| chrX | 10211423 | 10212436 | CG15309      | 690   | 257.191 | 18.07 |
| chrX | 10224670 | 10225077 | CG34408      | 1857  | 62.5419 | 8.89  |
| chrX | 10243533 | 10243878 | Hk           | 809   | 20.3193 | 4.97  |
| chrX | 10245205 | 10245650 | Hk           | 838   | 70.8907 | 8.77  |
| chrX | 10247327 | 10247761 | Hk           | 2976  | 76.2796 | 10.93 |
| chrX | 10250505 | 10250811 | CR43959      | 5999  | 24.4015 | 5.44  |
| chrX | 10260956 | 10261688 | Hk           | 159   | 87.3268 | 10.96 |
| chrX | 10263646 | 10264015 | Hk           | 344   | 22.559  | 4.39  |
| chrX | 10265130 | 10266175 | CG12643      | 512   | 72.8476 | 10.05 |
| chrX | 10307826 | 10308215 | alpha-Man-la | 1127  | 8.63625 | 3.02  |
| chrX | 10308872 | 10309441 | alpha-Man-la | 49    | 316.742 | 30.91 |
| chrX | 10319256 | 10319645 | alpha-Man-la | 6523  | 38.8796 | 5.33  |
| chrX | 10322247 | 10322557 | alpha-Man-la | 3444  | 9.68765 | 3.24  |
| chrX | 10324409 | 10324836 | alpha-Man-la | 1296  | 34.4738 | 6.45  |
| chrX | 10325159 | 10326023 | alpha-Man-la | 395   | 150.119 | 14.66 |
| chrX | 10329494 | 10329969 | Gip          | 93    | 107.38  | 9.93  |
| chrX | 10333333 | 10333804 | CG43740      | 99    | 63.5953 | 9.73  |
| chrX | 10344900 | 10345249 | snoRNA:U3:9B | 3071  | 56.4866 | 9.04  |
| chrX | 10365710 | 10366382 | l(1)G0289    | 57    | 23.5664 | 4.11  |
| chrX | 10369744 | 10370194 | CG17841      | 1997  | 33.6494 | 5.68  |
| chrX | 10370580 | 10371230 | CG17841      | 2737  | 15.013  | 3.79  |
| chrX | 10385835 | 10386944 | Psf3         | 184   | 62.669  | 8.69  |
| chrX | 10385835 | 10386944 | flw          | 86    | 62.669  | 8.69  |
| chrX | 10472556 | 10473199 | nocte        | 822   | 79.1851 | 8.77  |
| chrX | 10473524 | 10474804 | nocte        | 781   | 233.669 | 17.10 |
| chrX | 10473524 | 10474804 | CG2889       | 431   | 233.669 | 17.10 |
| chrX | 10473524 | 10474804 | nocte        | 307   | 233.669 | 17.10 |
| chrX | 10473524 | 10474804 | CG2889       | 347   | 233.669 | 17.10 |
| chrX | 10478683 | 10479600 | PPP4R2r      | 115   | 112.981 | 12.67 |
| chrX | 10486141 | 10487214 | CG32687      | 41    | 170.798 | 13.48 |
| chrX | 10544301 | 10544632 | spri         | 2313  | 24.4963 | 5.20  |
| chrX | 10546486 | 10548369 | spri         | 108   | 316.742 | 28.64 |
| chrX | 10585233 | 10585600 | spri         | 41    | 20.8219 | 4.76  |
| chrX | 10595713 | 10596271 | Hmr          | 255   | 62.7656 | 7.84  |
| chrX | 10595713 | 10596271 | CG2124       | 11    | 62.7656 | 7.84  |
| chrX | 10601492 | 10601890 | CG1628       | 90    | 44.856  | 7.85  |
| chrX | 10602258 | 10602659 | CG1628       | 280   | 20.3193 | 4.97  |
| chrX | 10613550 | 10613946 | CG43347      | 6470  | 13.3929 | 3.97  |
| chrX | 10619637 | 10620718 | CG43347      | 285   | 82.8388 | 11.52 |
| chrX | 10620989 | 10621841 | CG43347      | 1353  | 139.687 | 16.29 |
| chrX | 10627476 | 10628807 | X11Lbeta     | 65    | 51.8632 | 7.42  |
| chrX | 10729957 | 10730379 | ras          | 14342 | 108.942 | 12.71 |
| chrX | 10734818 | 10735224 | ras          | 9510  | 18.5762 | 4.39  |
| chrX | 10735549 | 10736316 | ras          | 8641  | 316.742 | 31.22 |
| chrX | 10737500 | 10738384 | ras          | 6337  | 16.862  | 4.20  |
| chrX | 10738704 | 10740233 | ras          | 5476  | 316.742 | 30.54 |
| chrX | 10742078 | 10743306 | ras          | 1393  | 68.8667 | 9.35  |
| chrX | 10744000 | 10745703 | ras          | 389   | 92.2404 | 9.20  |
| chrX | 10744000 | 10745703 | CR44766      | 383   | 92.2404 | 9.20  |
| chrX | 10744000 | 10745703 | CG32676      | 53    | 92.2404 | 9.20  |
| chrX | 10744000 | 10745703 | ras          | 543   | 92.2404 | 9.20  |
| chrX | 10757474 | 10758190 | Rph          | 14    | 16.0475 | 4.37  |
| chrX | 10758467 | 10758836 | Rph          | 867   | 10.1287 | 3.31  |
| chrX | 10763165 | 10764485 | Tango5       | 803   | 75.5278 | 8.37  |
| chrX | 10767193 | 10768754 | Atg8a        | 238   | 93.0738 | 9.68  |
| chrX | 10767193 | 10768754 | BTBD9        | 992   | 93.0738 | 9.68  |
| chrX | 10771757 | 10772729 | CG15211      | 83    | 316.742 | 30.41 |
| chrX | 10783553 | 10787044 | sesB         | 124   | 316.742 | 38.66 |
| chrX | 10783553 | 10787044 | Ant2         | 2325  | 316.742 | 38.66 |
| chrX | 10783553 | 10787044 | sesB         | 2325  | 316.742 | 38.66 |
| chrX | 10801022 | 10802583 | Imp          | 4566  | 316.742 | 23.88 |
| chrX | 10805332 | 10807162 | Imp          | 30    | 302.017 | 24.33 |
| chrX | 10832423 | 10832729 | CG15210      | 6665  | 34.0192 | 6.65  |
| chrX | 10857664 | 10858281 | CG2186       | 396   | 15.4323 | 3.94  |
| chrX | 10906380 | 10906867 | CG43901      | 880   | 23.3434 | 5.36  |
| chrX | 10923856 | 10925642 | v            | 32    | 20.9337 | 4.71  |
| chrX | 10927251 | 10927667 | CG2145       | 43    | 22.4872 | 5.07  |
| chrX | 10929766 | 10930073 | Myo10A       | 927   | 21.8144 | 5.16  |

|      |          |          |            |       |         |       |
|------|----------|----------|------------|-------|---------|-------|
| chrX | 10930484 | 10931661 | Myo10A     | 62    | 316.742 | 26.00 |
| chrX | 11081825 | 11082094 | CR44358    | 2682  | 19.0085 | 4.29  |
| chrX | 11086087 | 11086533 | sev        | 3     | 28.5967 | 5.88  |
| chrX | 11108429 | 11109245 | Hsp60      | 507   | 24.8304 | 5.19  |
| chrX | 11124191 | 11124836 | CG11122    | 107   | 15.2982 | 3.59  |
| chrX | 11136248 | 11136996 | Klp10A     | 129   | 41.7978 | 6.19  |
| chrX | 11142230 | 11142748 | CG15202    | 20    | 17.0481 | 4.06  |
| chrX | 11143794 | 11144309 | CG15201    | 138   | 42.0673 | 7.55  |
| chrX | 11146532 | 11146884 | Ran        | 136   | 11.3652 | 3.63  |
| chrX | 11147577 | 11147971 | Ran        | 849   | 9.14346 | 3.15  |
| chrX | 11148333 | 11148643 | Ran        | 44    | 13.8868 | 3.96  |
| chrX | 11154013 | 11155361 | Dlic       | 617   | 316.742 | 27.51 |
| chrX | 11155692 | 11156213 | Dlic       | 1597  | 57.7597 | 7.68  |
| chrX | 11293629 | 11293973 | CG44422    | 65    | 19.3066 | 4.71  |
| chrX | 11325274 | 11326894 | I(1)10Bb   | 1369  | 36.0308 | 5.90  |
| chrX | 11325274 | 11326894 | CG1657     | 1293  | 36.0308 | 5.90  |
| chrX | 11338914 | 11341164 | Kap3       | 1366  | 90.2114 | 10.65 |
| chrX | 11338914 | 11341164 | CG34348    | 1082  | 90.2114 | 10.65 |
| chrX | 11338914 | 11341164 | Kap3       | 870   | 90.2114 | 10.65 |
| chrX | 11350451 | 11351537 | CG1737     | 263   | 137.082 | 12.50 |
| chrX | 11355875 | 11356376 | dsh        | 241   | 33.0513 | 5.96  |
| chrX | 11359222 | 11359491 | Pa1        | 70    | 7.61925 | 2.68  |
| chrX | 11370139 | 11370799 | dlg1       | 695   | 52.2062 | 8.44  |
| chrX | 11372751 | 11373152 | dlg1       | 73    | 70.9218 | 10.43 |
| chrX | 11389639 | 11390395 | dlg1       | 54    | 316.742 | 23.05 |
| chrX | 11423198 | 11424210 | Gs2        | 415   | 316.742 | 30.21 |
| chrX | 11426137 | 11426719 | Gs2        | 2423  | 102.959 | 11.57 |
| chrX | 11427073 | 11427763 | Gs2        | 3490  | 95.1742 | 10.32 |
| chrX | 11442160 | 11442757 | Sk1        | 26    | 50.9627 | 7.35  |
| chrX | 11454015 | 11454441 | Evi5       | 148   | 20.8219 | 4.76  |
| chrX | 11493054 | 11493486 | Drak       | 69    | 35.5835 | 6.22  |
| chrX | 11494879 | 11495476 | Drak       | 1394  | 92.4249 | 10.95 |
| chrX | 11505512 | 11505775 | Drak       | 11840 | 16.3497 | 3.57  |
| chrX | 11518401 | 11518711 | Drak       | 24761 | 15.4627 | 4.15  |
| chrX | 11559932 | 11560881 | PGRP-SA    | 1438  | 72.6131 | 9.52  |
| chrX | 11570062 | 11570684 | RplI215    | 57    | 22.9663 | 5.10  |
| chrX | 11570062 | 11570684 | CG11699    | 351   | 22.9663 | 5.10  |
| chrX | 11599717 | 11600042 | rho-4      | 35    | 22.5747 | 5.26  |
| chrX | 11600743 | 11601530 | rho-4      | 1105  | 52.7684 | 7.50  |
| chrX | 11616182 | 11616776 | Met        | 419   | 133.224 | 11.91 |
| chrX | 11621788 | 11623148 | Ptp10D     | 872   | 316.742 | 23.78 |
| chrX | 11623544 | 11623841 | Ptp10D     | 1674  | 31.1217 | 5.65  |
| chrX | 11678937 | 11679853 | bif        | 683   | 24.5777 | 5.14  |
| chrX | 11681646 | 11682346 | bif        | 3007  | 316.742 | 28.63 |
| chrX | 11683266 | 11683883 | bif        | 4583  | 28.2173 | 4.83  |
| chrX | 11684480 | 11684909 | bif        | 5706  | 34.0192 | 6.65  |
| chrX | 11686060 | 11686808 | bif        | 7390  | 316.742 | 42.27 |
| chrX | 11694966 | 11696151 | PhKgamma   | 218   | 36.1768 | 5.71  |
| chrX | 11710417 | 11710786 | FucT6      | 659   | 58.8424 | 7.96  |
| chrX | 11713566 | 11717211 | Amun       | 40    | 316.742 | 29.70 |
| chrX | 11713566 | 11717211 | CR45618    | 2833  | 316.742 | 29.70 |
| chrX | 11713566 | 11717211 | prtp       | 2868  | 316.742 | 29.70 |
| chrX | 11729709 | 11730220 | inaF-D     | 846   | 58.4945 | 9.24  |
| chrX | 11764329 | 11765082 | CG9360     | 60    | 174.952 | 17.34 |
| chrX | 11791448 | 11793401 | CR44962    | 30    | 316.742 | 22.64 |
| chrX | 11791448 | 11793401 | CklIbeta   | 785   | 316.742 | 22.64 |
| chrX | 11805003 | 11806513 | Hsc70-3    | 111   | 212.339 | 16.73 |
| chrX | 11806960 | 11807821 | Hsc70-3    | 398   | 316.742 | 33.35 |
| chrX | 11815634 | 11819264 | CG1578     | 1309  | 316.742 | 25.60 |
| chrX | 11815634 | 11819264 | rudhira    | 476   | 316.742 | 25.60 |
| chrX | 11819901 | 11821134 | rudhira    | 2469  | 94.3979 | 10.84 |
| chrX | 11821842 | 11822203 | rudhira    | 3709  | 40.5664 | 6.99  |
| chrX | 11823031 | 11823659 | rudhira    | 4982  | 316.742 | 23.84 |
| chrX | 11828667 | 11828971 | CR43908    | 8832  | 34.0192 | 6.65  |
| chrX | 11854929 | 11855225 | CG10347    | 110   | 13.3869 | 3.65  |
| chrX | 11854929 | 11855225 | ATP7       | 20    | 13.3869 | 3.65  |
| chrX | 11873146 | 11873522 | CG15739    | 19    | 21.7466 | 4.98  |
| chrX | 11914722 | 11915679 | pot        | 2235  | 139.687 | 16.29 |
| chrX | 11917038 | 11917661 | pot        | 136   | 316.742 | 31.42 |
| chrX | 11922703 | 11923085 | ScIp       | 134   | 59.4736 | 8.83  |
| chrX | 12003722 | 12004109 | fw         | 15    | 14.7    | 4.17  |
| chrX | 12006707 | 12008053 | CG1806     | 133   | 316.742 | 45.23 |
| chrX | 12014802 | 12015524 | regucalcin | 387   | 19.9502 | 4.56  |
| chrX | 12018569 | 12019137 | CG15735    | 277   | 39.7982 | 6.83  |
| chrX | 12028310 | 12029066 | Usp7       | 141   | 13.6388 | 3.77  |



|      |          |          |            |       |         |       |
|------|----------|----------|------------|-------|---------|-------|
| chrX | 12031256 | 12031512 | Cyp311a1   | 43    | 16.0074 | 4.21  |
| chrX | 12085768 | 12086297 | CG15734    | 1169  | 16.0475 | 4.37  |
| chrX | 12128189 | 12128449 | Ten-a      | 62    | 10.3226 | 3.48  |
| chrX | 12203339 | 12204011 | Ten-a      | 155   | 269.478 | 22.76 |
| chrX | 12389145 | 12389541 | Ir11a      | 11559 | 26.4968 | 5.76  |
| chrX | 12463496 | 12464363 | CG42258    | 123   | 13.0309 | 3.42  |
| chrX | 12470056 | 12470956 | CG42258    | 1225  | 316.742 | 25.52 |
| chrX | 12471307 | 12473018 | CG42258    | 81    | 286.917 | 22.85 |
| chrX | 12482997 | 12483555 | Cpr11A     | 3577  | 24.1197 | 5.46  |
| chrX | 12546095 | 12548174 | CG43921    | 601   | 89.4868 | 11.13 |
| chrX | 12567214 | 12568743 | CG43921    | 450   | 46.8918 | 6.86  |
| chrX | 12574594 | 12576059 | CG43921    | 6506  | 185.81  | 15.11 |
| chrX | 12578891 | 12579479 | CG11138    | 3896  | 57.4829 | 7.54  |
| chrX | 12579824 | 12580944 | CG11138    | 3051  | 175.18  | 14.10 |
| chrX | 12582771 | 12583801 | CG11138    | 107   | 147.059 | 12.95 |
| chrX | 12591128 | 12592156 | LIMK1      | 391   | 23.6409 | 4.54  |
| chrX | 12595165 | 12597029 | CG1824     | 839   | 270.376 | 20.14 |
| chrX | 12595165 | 12597029 | Sec16      | 212   | 270.376 | 20.14 |
| chrX | 12601029 | 12601444 | Sec16      | 4336  | 47.5554 | 8.11  |
| chrX | 12612197 | 12612757 | CG2543     | 36    | 55.4106 | 8.67  |
| chrX | 12613097 | 12613506 | CG2543     | 823   | 76.2796 | 10.93 |
| chrX | 12615765 | 12616055 | CR45621    | 155   | 14.0411 | 4.07  |
| chrX | 12631603 | 12632357 | Tomosyn    | 214   | 27.6062 | 4.96  |
| chrX | 12633289 | 12634474 | Tomosyn    | 7     | 23.4631 | 5.13  |
| chrX | 12653614 | 12654860 | Cklalpha   | 72    | 23.7739 | 4.06  |
| chrX | 12658999 | 12659663 | Tis11      | 69    | 49.5158 | 6.32  |
| chrX | 12658999 | 12659663 | CR33963    | 22    | 49.5158 | 6.32  |
| chrX | 12660065 | 12660719 | Tis11      | 67    | 154.619 | 14.92 |
| chrX | 12661447 | 12661978 | Tis11      | 1127  | 188.85  | 19.08 |
| chrX | 12664955 | 12666626 | Tis11      | 4697  | 316.742 | 38.45 |
| chrX | 12667528 | 12668163 | Tis11      | 7440  | 23.2357 | 5.16  |
| chrX | 12669611 | 12670026 | Tis11      | 9245  | 35.5741 | 5.97  |
| chrX | 12671686 | 12671976 | Tis11      | 11306 | 16.7264 | 4.17  |
| chrX | 12672510 | 12673133 | Tis11      | 12282 | 17.814  | 3.98  |
| chrX | 12673627 | 12674477 | Tis11      | 13378 | 159.985 | 15.89 |
| chrX | 12699324 | 12699768 | CG15725    | 6349  | 54.498  | 8.84  |
| chrX | 12715949 | 12716323 | CR43963    | 2410  | 14.9811 | 3.90  |
| chrX | 12716808 | 12717079 | CR43963    | 1575  | 11.6708 | 3.53  |
| chrX | 12720013 | 12720560 | CR43963    | 1830  | 81.8905 | 10.89 |
| chrX | 12721068 | 12721775 | CR43963    | 2941  | 45.9589 | 6.53  |
| chrX | 12724190 | 12724757 | CR43963    | 6047  | 61.4917 | 9.26  |
| chrX | 12725017 | 12725854 | CR43963    | 5699  | 183.255 | 17.65 |
| chrX | 12727582 | 12728173 | CR43963    | 3213  | 16.5248 | 4.06  |
| chrX | 12734394 | 12734709 | CR43963    | 3605  | 20.8219 | 4.76  |
| chrX | 12734995 | 12736549 | CR43963    | 4316  | 270.661 | 17.20 |
| chrX | 12737038 | 12737901 | Smr        | 4689  | 182.472 | 17.05 |
| chrX | 12741835 | 12742563 | Smr        | 46    | 39.2811 | 6.19  |
| chrX | 12741835 | 12742563 | CR45623    | 522   | 39.2811 | 6.19  |
| chrX | 12750232 | 12752429 | CR44619    | 160   | 245.168 | 18.42 |
| chrX | 12753597 | 12756792 | CR44619    | 2245  | 316.742 | 27.62 |
| chrX | 12760276 | 12760808 | ade5       | 81    | 127.462 | 13.65 |
| chrX | 12765228 | 12765839 | CG3812     | 409   | 13.3929 | 3.97  |
| chrX | 12784559 | 12785161 | CG32647    | 29    | 109.537 | 9.50  |
| chrX | 12869423 | 12870036 | Pde9       | 1041  | 86.7176 | 11.50 |
| chrX | 12890201 | 12890575 | Pde9       | 6948  | 65.4488 | 9.75  |
| chrX | 12905248 | 12906236 | CG4404     | 112   | 40.3927 | 6.02  |
| chrX | 12917207 | 12917536 | fne        | 119   | 10.9134 | 3.58  |
| chrX | 12925426 | 12926452 | fne        | 8254  | 153.652 | 17.38 |
| chrX | 12929786 | 12930286 | fne        | 8466  | 67.5523 | 10.09 |
| chrX | 12938020 | 12938579 | fne        | 224   | 110.363 | 13.91 |
| chrX | 12988162 | 12988754 | rad        | 366   | 12.2997 | 3.69  |
| chrX | 13087421 | 13087823 | hep        | 2741  | 29.6697 | 6.13  |
| chrX | 13089708 | 13090504 | hep        | 299   | 147.312 | 14.84 |
| chrX | 13090984 | 13091338 | lic        | 32    | 31.3257 | 5.19  |
| chrX | 13128000 | 13129174 | snmRNA:204 | 283   | 43.8783 | 6.25  |
| chrX | 13128000 | 13129174 | CG32638    | 447   | 43.8783 | 6.25  |
| chrX | 13128000 | 13129174 | CG15717    | 604   | 43.8783 | 6.25  |
| chrX | 13128000 | 13129174 | MFS10      | 670   | 43.8783 | 6.25  |
| chrX | 13128000 | 13129174 | CG15717    | 670   | 43.8783 | 6.25  |
| chrX | 13130829 | 13132062 | MFS10      | 216   | 316.742 | 35.08 |
| chrX | 13138847 | 13139241 | CG32645    | 157   | 41.1492 | 7.45  |
| chrX | 13208468 | 13208974 | sno        | 2942  | 56.9036 | 8.76  |
| chrX | 13209666 | 13209948 | sno        | 1938  | 9.45705 | 3.08  |
| chrX | 13211390 | 13211728 | sno        | 123   | 19.1824 | 4.20  |
| chrX | 13237597 | 13237992 | CG32639    | 1229  | 79.542  | 11.22 |

|      |          |          |             |       |         |       |
|------|----------|----------|-------------|-------|---------|-------|
| chrX | 13238261 | 13238575 | CG32639     | 1823  | 21.8144 | 5.16  |
| chrX | 13256955 | 13257292 | mew         | 66    | 18.1596 | 4.37  |
| chrX | 13272647 | 13273076 | HDAC4       | 106   | 53.5107 | 8.74  |
| chrX | 13273367 | 13273652 | HDAC4       | 763   | 14.7    | 4.17  |
| chrX | 13277071 | 13279106 | HDAC4       | 6071  | 246.039 | 21.69 |
| chrX | 13280394 | 13280719 | HDAC4       | 5038  | 17.6934 | 4.13  |
| chrX | 13284373 | 13285600 | HDAC4       | 922   | 167.951 | 15.62 |
| chrX | 13288004 | 13288536 | CG15744     | 252   | 37.2267 | 6.47  |
| chrX | 13300574 | 13301461 | CG1764      | 1177  | 161.046 | 16.39 |
| chrX | 13302117 | 13303025 | CG1764      | 342   | 75.427  | 8.43  |
| chrX | 13303823 | 13304588 | CR45018     | 80    | 145.691 | 16.72 |
| chrX | 13310886 | 13311212 | IP3K2       | 4029  | 15.2212 | 3.89  |
| chrX | 13314889 | 13315291 | IP3K2       | 94    | 21.487  | 5.00  |
| chrX | 13319472 | 13320123 | IP3K2       | 1557  | 316.742 | 37.34 |
| chrX | 13320510 | 13321676 | IP3K2       | 11    | 105.937 | 13.11 |
| chrX | 13322249 | 13322942 | IP3K2       | 1213  | 227.658 | 22.06 |
| chrX | 13329592 | 13330285 | Jafrac1     | 107   | 152.945 | 14.49 |
| chrX | 13332061 | 13333758 | CR32636     | 337   | 19.9394 | 4.30  |
| chrX | 13358334 | 13358592 | Syt12       | 797   | 13.6626 | 3.91  |
| chrX | 13359059 | 13359388 | Syt12       | 28    | 14.0411 | 4.07  |
| chrX | 13371063 | 13371605 | CG1640      | 331   | 12.914  | 3.49  |
| chrX | 13373178 | 13374744 | CG1640      | 52    | 85.0628 | 9.16  |
| chrX | 13384664 | 13384958 | Rbp1-like   | 49    | 16.1989 | 3.72  |
| chrX | 13386792 | 13387467 | Yippee      | 414   | 30.556  | 5.24  |
| chrX | 13394876 | 13395388 | CR44621     | 721   | 105.642 | 13.51 |
| chrX | 13396625 | 13397095 | CG1673      | 65    | 146.313 | 16.51 |
| chrX | 13403770 | 13405127 | GstT4       | 122   | 81.8514 | 10.14 |
| chrX | 13411065 | 13411869 | CG1998      | 10    | 108.155 | 12.42 |
| chrX | 13412622 | 13413494 | CG1998      | 5     | 126.536 | 11.42 |
| chrX | 13412622 | 13413494 | Set2        | 162   | 126.536 | 11.42 |
| chrX | 13563511 | 13564359 | Tango13     | 63    | 28.3996 | 4.92  |
| chrX | 13615993 | 13616511 | tth         | 172   | 26.064  | 5.15  |
| chrX | 13624303 | 13625853 | CG2691      | 654   | 237.401 | 16.17 |
| chrX | 13624303 | 13625853 | NFAT        | 318   | 237.401 | 16.17 |
| chrX | 13626916 | 13627204 | NFAT        | 2358  | 21.437  | 4.82  |
| chrX | 13627628 | 13628104 | NFAT        | 3103  | 18.2075 | 3.81  |
| chrX | 13630148 | 13630951 | NFAT        | 5980  | 39.9166 | 6.57  |
| chrX | 13636755 | 13637078 | NFAT        | 5278  | 14.6478 | 4.16  |
| chrX | 13640068 | 13641030 | NFAT        | 1427  | 277.21  | 22.30 |
| chrX | 13641487 | 13642439 | NFAT        | 194   | 316.742 | 34.64 |
| chrX | 13696803 | 13697259 | NnaD        | 344   | 22.5747 | 5.26  |
| chrX | 13703258 | 13703533 | NnaD        | 131   | 20.3193 | 4.97  |
| chrX | 13718036 | 13718352 | CG9940      | 26    | 10.0647 | 3.35  |
| chrX | 13736088 | 13736396 | g           | 1     | 10.9947 | 3.41  |
| chrX | 13739359 | 13740513 | CG11151     | 50    | 216.344 | 14.68 |
| chrX | 13747000 | 13748593 | CR42861     | 2418  | 316.742 | 32.45 |
| chrX | 13754500 | 13755586 | CR43833     | 45    | 96.1322 | 9.79  |
| chrX | 13754500 | 13755586 | Pdcd4       | 40    | 96.1322 | 9.79  |
| chrX | 13761659 | 13763501 | rdgB        | 469   | 281.104 | 20.02 |
| chrX | 13763874 | 13764321 | rdgB        | 1358  | 131.69  | 14.32 |
| chrX | 13781791 | 13782466 | CtsB1       | 127   | 43.0447 | 5.85  |
| chrX | 13781791 | 13782466 | CG11103     | 415   | 43.0447 | 5.85  |
| chrX | 13783526 | 13784596 | inaE        | 66    | 126.609 | 13.10 |
| chrX | 13805493 | 13806104 | CG11095     | 5983  | 95.7323 | 12.13 |
| chrX | 13815809 | 13816111 | CG11095     | 4235  | 15.6485 | 3.82  |
| chrX | 13821471 | 13822458 | Clic        | 55    | 37.6335 | 5.55  |
| chrX | 13829975 | 13830261 | jub         | 182   | 11.3718 | 3.45  |
| chrX | 13839041 | 13839366 | AMPdeam     | 819   | 19.5844 | 4.87  |
| chrX | 13844404 | 13844850 | AMPdeam     | 1206  | 16.553  | 4.20  |
| chrX | 13845744 | 13846011 | AMPdeam     | 36    | 13.8792 | 3.28  |
| chrX | 13879250 | 13879814 | AMPdeam     | 33548 | 19.5844 | 4.87  |
| chrX | 13888867 | 13890764 | mamo        | 43787 | 151.593 | 13.77 |
| chrX | 13893360 | 13894160 | mamo        | 39662 | 102.183 | 12.61 |
| chrX | 13933096 | 13934426 | mamo        | 710   | 182.601 | 17.38 |
| chrX | 13935339 | 13936992 | mamo        | 2798  | 204.576 | 18.78 |
| chrX | 13963960 | 13964429 | CG11068     | 8980  | 49.6123 | 8.34  |
| chrX | 13986315 | 13987062 | mamo        | 314   | 316.742 | 22.42 |
| chrX | 13988641 | 13989394 | mamo        | 276   | 107.976 | 13.08 |
| chrX | 13990411 | 13991214 | mamo        | 386   | 221.494 | 17.37 |
| chrX | 13990411 | 13991214 | CR44655     | 181   | 221.494 | 17.37 |
| chrX | 13994652 | 13995494 | ben         | 1361  | 316.742 | 23.27 |
| chrX | 13995979 | 13997222 | ben         | 273   | 20.7834 | 4.35  |
| chrX | 14037875 | 14038593 | Ste:CG33247 | 9143  | 149.454 | 17.01 |
| chrX | 14037875 | 14038593 | Ste:CG33237 | 9143  | 149.454 | 17.01 |
| chrX | 14082591 | 14083275 | CR46242     | 14714 | 316.742 | 35.12 |

|      |          |          |           |       |         |       |
|------|----------|----------|-----------|-------|---------|-------|
| chrX | 14083611 | 14085007 | CR46242   | 13771 | 83.4293 | 11.22 |
| chrX | 14091034 | 14091345 | CR46242   | 6344  | 14.5249 | 4.05  |
| chrX | 14208459 | 14209269 | I(1)G0469 | 2732  | 58.7158 | 8.45  |
| chrX | 14211164 | 14212652 | I(1)G0469 | 849   | 316.742 | 23.27 |
| chrX | 14211164 | 14212652 | I(1)G0007 | 108   | 316.742 | 23.27 |
| chrX | 14213800 | 14214154 | I(1)G0007 | 1538  | 10.2804 | 3.14  |
| chrX | 14214712 | 14215575 | I(1)G0007 | 2636  | 41.2284 | 6.93  |
| chrX | 14217979 | 14219221 | I(1)G0007 | 5931  | 316.742 | 25.71 |
| chrX | 14222029 | 14222446 | CG11674   | 3660  | 53.3377 | 8.70  |
| chrX | 14233701 | 14234161 | CG42271   | 171   | 14.7609 | 3.63  |
| chrX | 14261015 | 14261406 | CG1461    | 104   | 11.516  | 3.68  |
| chrX | 14321885 | 14322657 | dpr8      | 153   | 23.3434 | 5.36  |
| chrX | 14483337 | 14483658 | CG9411    | 3376  | 22.5747 | 5.26  |
| chrX | 14591446 | 14591898 | CG9413    | 162   | 36.6468 | 6.95  |
| chrX | 14602360 | 14602789 | CG9413    | 11    | 39.2756 | 6.72  |
| chrX | 14653864 | 14654208 | NetA      | 107   | 36.5721 | 6.52  |
| chrX | 14748872 | 14749876 | NetB      | 67    | 119.332 | 13.07 |
| chrX | 14824843 | 14826307 | rut       | 41    | 29.8308 | 4.76  |
| chrX | 14831773 | 14832066 | CG14408   | 123   | 7.48484 | 2.61  |
| chrX | 14832510 | 14832844 | CG14411   | 46    | 19.8065 | 4.46  |
| chrX | 14839600 | 14840417 | Flo2      | 78    | 213.914 | 16.97 |
| chrX | 14929510 | 14929939 | Flo2      | 77    | 9.68765 | 3.24  |
| chrX | 14947339 | 14947791 | pdgy      | 3168  | 57.513  | 8.65  |
| chrX | 14948693 | 14949205 | pdgy      | 1691  | 12.7565 | 3.87  |
| chrX | 14950314 | 14951764 | pdgy      | 410   | 207.734 | 18.73 |
| chrX | 14952081 | 14952799 | pdgy      | 344   | 316.742 | 23.34 |
| chrX | 14953108 | 14953882 | pdgy      | 115   | 97.4456 | 10.81 |
| chrX | 14953108 | 14953882 | CR44831   | 50    | 97.4456 | 10.81 |
| chrX | 15022141 | 15022592 | be        | 2093  | 59.5055 | 9.34  |
| chrX | 15023679 | 15025083 | be        | 532   | 269.073 | 25.73 |
| chrX | 15025661 | 15026157 | be        | 1506  | 175.93  | 18.73 |
| chrX | 15043188 | 15044575 | CG5541    | 398   | 316.742 | 28.38 |
| chrX | 15048754 | 15049123 | CG5541    | 52    | 26.011  | 5.21  |
| chrX | 15062668 | 15063469 | hiw       | 589   | 21.8144 | 5.16  |
| chrX | 15068554 | 15068845 | dob       | 1674  | 7.85541 | 2.91  |
| chrX | 15069175 | 15070075 | dob       | 2473  | 110.363 | 13.91 |
| chrX | 15070713 | 15071431 | dob       | 4372  | 10.5286 | 3.41  |
| chrX | 15072840 | 15073156 | Lsd-2     | 3169  | 8.62644 | 3.18  |
| chrX | 15074529 | 15076973 | Lsd-2     | 979   | 257.88  | 20.42 |
| chrX | 15082580 | 15083078 | CG33178   | 3     | 49.3464 | 8.16  |
| chrX | 15086127 | 15086422 | CG5599    | 100   | 10.2627 | 3.18  |
| chrX | 15089433 | 15089836 | Rab3-GEF  | 85    | 25.5273 | 5.44  |
| chrX | 15139087 | 15139622 | Rpl37a    | 111   | 14.4561 | 3.57  |
| chrX | 15162931 | 15163324 | CG9095    | 104   | 47.6938 | 8.14  |
| chrX | 15175257 | 15175694 | CG43737   | 24    | 14.4475 | 3.96  |
| chrX | 15297381 | 15299438 | gce       | 1080  | 316.742 | 37.22 |
| chrX | 15297381 | 15299438 | CR44429   | 628   | 316.742 | 37.22 |
| chrX | 15297381 | 15299438 | gce       | 163   | 316.742 | 37.22 |
| chrX | 15301123 | 15301715 | gce       | 843   | 316.742 | 26.99 |
| chrX | 15302262 | 15302808 | gce       | 2067  | 191.533 | 17.49 |
| chrX | 15303162 | 15303887 | gce       | 3079  | 274.103 | 21.93 |
| chrX | 15306241 | 15306787 | gce       | 5990  | 316.742 | 26.17 |
| chrX | 15311853 | 15312950 | CR44961   | 5820  | 56.7054 | 8.37  |
| chrX | 15313545 | 15314498 | CR44961   | 4129  | 91.6606 | 11.30 |
| chrX | 15319288 | 15321170 | Top1      | 3     | 26.5472 | 5.50  |
| chrX | 15319288 | 15321170 | mir-4957  | 549   | 26.5472 | 5.50  |
| chrX | 15319288 | 15321170 | Top1      | 880   | 26.5472 | 5.50  |
| chrX | 15323255 | 15323844 | Top1      | 98    | 52.8514 | 7.08  |
| chrX | 15333053 | 15333851 | CG9114    | 231   | 316.742 | 33.86 |
| chrX | 15333053 | 15333851 | HDAC6     | 76    | 316.742 | 33.86 |
| chrX | 15356285 | 15356805 | Pp1-13C   | 4505  | 48.6506 | 8.24  |
| chrX | 15379267 | 15379790 | acj6      | 443   | 23.3434 | 5.36  |
| chrX | 15441091 | 15441740 | Cngl      | 180   | 28.9409 | 6.06  |
| chrX | 15443439 | 15443823 | Cngl      | 2352  | 16.0475 | 4.37  |
| chrX | 15449374 | 15450968 | Scamp     | 220   | 47.0783 | 6.81  |
| chrX | 15449374 | 15450968 | Ahcy13    | 597   | 47.0783 | 6.81  |
| chrX | 15452369 | 15452776 | CG11655   | 868   | 107.802 | 12.62 |
| chrX | 15453182 | 15453814 | CG11655   | 21    | 236.113 | 19.45 |
| chrX | 15465205 | 15465893 | CG6299    | 110   | 237.514 | 23.54 |
| chrX | 15483182 | 15483514 | CG6340    | 980   | 23.0575 | 4.88  |
| chrX | 15484635 | 15485041 | Gmap      | 2078  | 50.3686 | 7.61  |
| chrX | 15497632 | 15498042 | CR44888   | 33    | 66.7095 | 10.03 |
| chrX | 15498754 | 15499671 | Gmap      | 20    | 42.6146 | 6.49  |
| chrX | 15543367 | 15543984 | CR44354   | 3922  | 19.1317 | 4.32  |
| chrX | 15544906 | 15545469 | CR44354   | 2466  | 17.4341 | 4.57  |

|      |          |          |          |      |         |       |
|------|----------|----------|----------|------|---------|-------|
| chrX | 15545737 | 15546004 | CR44354  | 1870 | 13.6062 | 3.96  |
| chrX | 15554148 | 15554436 | Ac13E    | 5    | 17.0088 | 3.68  |
| chrX | 15592957 | 15594617 | CG9220   | 218  | 316.742 | 24.48 |
| chrX | 15598581 | 15598843 | CG9220   | 5112 | 7.58498 | 2.88  |
| chrX | 15601638 | 15601999 | CG9220   | 8251 | 20.7519 | 4.90  |
| chrX | 15626215 | 15626718 | sog      | 21   | 123.092 | 13.52 |
| chrX | 15631940 | 15632271 | sog      | 1367 | 32.2437 | 5.88  |
| chrX | 15633209 | 15633893 | sog      | 157  | 316.742 | 47.95 |
| chrX | 15697561 | 15697940 | CG8128   | 372  | 5.47695 | 2.26  |
| chrX | 15709647 | 15710819 | CG9281   | 17   | 108.391 | 11.71 |
| chrX | 15709647 | 15710819 | CG15601  | 124  | 108.391 | 11.71 |
| chrX | 15712600 | 15713690 | CG8184   | 283  | 45.9589 | 6.53  |
| chrX | 15760396 | 15760654 | Graf     | 129  | 11.516  | 3.68  |
| chrX | 15803330 | 15803789 | PGRP-LE  | 255  | 39.3523 | 6.37  |
| chrX | 15804066 | 15805274 | sd       | 44   | 316.742 | 24.58 |
| chrX | 15811463 | 15813914 | sd       | 257  | 316.742 | 42.46 |
| chrX | 15834456 | 15835426 | Chc      | 26   | 316.742 | 25.46 |
| chrX | 15844131 | 15844400 | Aats-arg | 170  | 6.21352 | 2.45  |
| chrX | 15860385 | 15860902 | Gbeta13F | 164  | 88.665  | 9.84  |
| chrX | 15867746 | 15868494 | Gapdh2   | 17   | 229.803 | 17.25 |
| chrX | 15886593 | 15887433 | tay      | 511  | 139.156 | 14.89 |
| chrX | 15892095 | 15892385 | shi      | 3    | 9.07558 | 2.63  |
| chrX | 15892573 | 15892858 | shi      | 220  | 11.034  | 3.13  |
| chrX | 15973056 | 15973645 | mmd      | 223  | 43.8983 | 7.63  |
| chrX | 15973056 | 15973645 | CR45527  | 172  | 43.8983 | 7.63  |
| chrX | 16063521 | 16063863 | dpr18    | 18   | 14.3778 | 3.88  |
| chrX | 16072908 | 16073594 | Nipsnap  | 11   | 14.8813 | 3.82  |
| chrX | 16085842 | 16086603 | Tob      | 1289 | 140.497 | 14.56 |
| chrX | 16087438 | 16087882 | Tob      | 292  | 128.066 | 14.50 |
| chrX | 16089051 | 16089787 | Tob      | 75   | 316.742 | 22.92 |
| chrX | 16091304 | 16091925 | Tob      | 183  | 229.803 | 17.25 |
| chrX | 16092508 | 16092921 | Tob      | 1195 | 61.5998 | 9.16  |
| chrX | 16101697 | 16102019 | CG42353  | 3089 | 12.8627 | 3.70  |
| chrX | 16101697 | 16102019 | CG42354  | 3089 | 12.8627 | 3.70  |
| chrX | 16101697 | 16102019 | CG42353  | 3089 | 12.8627 | 3.70  |
| chrX | 16104330 | 16105184 | CG42353  | 8    | 69.3184 | 8.32  |
| chrX | 16104330 | 16105184 | CG42354  | 8    | 69.3184 | 8.32  |
| chrX | 16104330 | 16105184 | CG42353  | 8    | 69.3184 | 8.32  |
| chrX | 16147432 | 16148556 | disco-r  | 1135 | 157.807 | 14.30 |
| chrX | 16148826 | 16149587 | disco-r  | 281  | 316.742 | 29.51 |
| chrX | 16150399 | 16151085 | disco-r  | 1796 | 204.391 | 18.29 |
| chrX | 16216461 | 16217961 | disco    | 240  | 316.742 | 39.60 |
| chrX | 16270765 | 16271228 | Mfe2     | 6    | 27.8127 | 5.07  |
| chrX | 16278245 | 16278600 | eas      | 35   | 16.1275 | 3.27  |
| chrX | 16281671 | 16282192 | eas      | 3328 | 61.8639 | 8.43  |
| chrX | 16296247 | 16297263 | CG9911   | 60   | 7.81799 | 2.53  |
| chrX | 16296247 | 16297263 | CG3632   | 23   | 7.81799 | 2.53  |
| chrX | 16296247 | 16297263 | CG9911   | 238  | 7.81799 | 2.53  |
| chrX | 16296247 | 16297263 | CG3632   | 435  | 7.81799 | 2.53  |
| chrX | 16319267 | 16320408 | Cyp1     | 877  | 19.0757 | 4.12  |
| chrX | 16332549 | 16333940 | CG9921   | 71   | 316.742 | 32.20 |
| chrX | 16332549 | 16333940 | Dsp1     | 82   | 316.742 | 32.20 |
| chrX | 16334365 | 16334875 | Dsp1     | 1065 | 10.6058 | 2.86  |
| chrX | 16372463 | 16373648 | Fur2     | 38   | 20.8549 | 4.19  |
| chrX | 16385251 | 16385927 | CG4239   | 54   | 110.556 | 11.07 |
| chrX | 16421789 | 16423387 | AnxB11   | 810  | 57.4362 | 8.30  |
| chrX | 16421789 | 16423387 | hang     | 245  | 57.4362 | 8.30  |
| chrX | 16424287 | 16425541 | hang     | 2484 | 98.3183 | 10.53 |
| chrX | 16441724 | 16442568 | rngo     | 489  | 70.7211 | 9.61  |
| chrX | 16448532 | 16449384 | Rbp2     | 105  | 45.8078 | 5.83  |
| chrX | 16526072 | 16526595 | Cnx14D   | 899  | 165.302 | 18.28 |
| chrX | 16531071 | 16531814 | para     | 1746 | 28.8275 | 6.03  |
| chrX | 16532857 | 16533562 | para     | 16   | 24.1197 | 5.46  |
| chrX | 16552805 | 16554001 | Arp2     | 228  | 157.768 | 13.17 |
| chrX | 16559242 | 16560215 | Pp2B-14D | 403  | 316.742 | 28.15 |
| chrX | 16562331 | 16562626 | Pp2B-14D | 2457 | 20.9195 | 4.63  |
| chrX | 16579413 | 16580016 | CanA-14F | 6802 | 18.3275 | 4.63  |
| chrX | 16581979 | 16582458 | CanA-14F | 4534 | 30.6062 | 6.26  |
| chrX | 16585301 | 16587268 | CanA-14F | 1153 | 40.4034 | 7.17  |
| chrX | 16599112 | 16600106 | CG9784   | 698  | 54.3603 | 7.52  |
| chrX | 16599112 | 16600106 | Nup153   | 673  | 54.3603 | 7.52  |
| chrX | 16607895 | 16608253 | mir-4965 | 1971 | 35.2967 | 6.25  |
| chrX | 16610555 | 16611282 | mbt      | 358  | 20.0006 | 4.89  |
| chrX | 16637041 | 16637441 | Rok      | 183  | 31.5667 | 5.43  |
| chrX | 16637749 | 16638387 | RpS19a   | 31   | 232.686 | 19.02 |

|      |          |          |            |       |         |       |
|------|----------|----------|------------|-------|---------|-------|
| chrX | 16640702 | 16641186 | mthl1      | 30    | 36.4947 | 5.83  |
| chrX | 16643494 | 16643749 | CR46147    | 2572  | 9.54821 | 2.97  |
| chrX | 16648354 | 16648675 | CR46147    | 2344  | 12.1308 | 3.77  |
| chrX | 16650508 | 16650933 | CG42512    | 571   | 10.2284 | 3.33  |
| chrX | 16650508 | 16650933 | CG32573    | 571   | 10.2284 | 3.33  |
| chrX | 16655007 | 16656093 | CG9723     | 726   | 72.7521 | 9.21  |
| chrX | 16655007 | 16656093 | r          | 272   | 72.7521 | 9.21  |
| chrX | 16683498 | 16684080 | Axs        | 96    | 12.0506 | 3.06  |
| chrX | 16687324 | 16687870 | 44078      | 66    | 72.8378 | 10.58 |
| chrX | 16694587 | 16695250 | 44078      | 16    | 21.6072 | 4.12  |
| chrX | 16695773 | 16696158 | CG4678     | 255   | 12.2121 | 3.49  |
| chrX | 16696679 | 16697041 | CG4678     | 769   | 12.1308 | 3.77  |
| chrX | 16723330 | 16723870 | CG34325    | 2161  | 152.007 | 17.20 |
| chrX | 16750725 | 16751977 | goe        | 489   | 159.021 | 15.42 |
| chrX | 16773207 | 16773735 | if         | 7596  | 118.743 | 14.60 |
| chrX | 16780183 | 16780729 | if         | 584   | 175.594 | 17.15 |
| chrX | 16782167 | 16782826 | if         | 25    | 103.699 | 11.01 |
| chrX | 16787701 | 16788030 | Sap30      | 83    | 16.8268 | 4.41  |
| chrX | 16792139 | 16792506 | CG4768     | 235   | 8.21781 | 2.55  |
| chrX | 16835259 | 16836596 | CG13004    | 764   | 316.742 | 35.06 |
| chrX | 16844228 | 16844695 | RSG7       | 16    | 55.49   | 8.94  |
| chrX | 16897685 | 16898099 | CG33252    | 702   | 60.5212 | 9.44  |
| chrX | 16912900 | 16913735 | CG4928     | 309   | 170.49  | 17.28 |
| chrX | 16916070 | 16916367 | CG4928     | 3071  | 22.982  | 5.19  |
| chrX | 16930655 | 16931544 | CG4928     | 6209  | 43.9502 | 6.05  |
| chrX | 16943266 | 16944582 | RhoGAP15B  | 468   | 117.874 | 11.95 |
| chrX | 16945134 | 16945426 | RhoGAP15B  | 2000  | 11.9316 | 3.65  |
| chrX | 16946747 | 16947047 | CG13000    | 1576  | 21.3477 | 4.40  |
| chrX | 16964021 | 16964420 | Ubr1       | 4459  | 53.2082 | 6.98  |
| chrX | 16966574 | 16966896 | Ubr1       | 2055  | 7.47705 | 2.76  |
| chrX | 16967574 | 16968790 | Ubr1       | 443   | 24.4843 | 4.89  |
| chrX | 17047677 | 17048107 | CG45002    | 15188 | 36.6468 | 6.95  |
| chrX | 17076542 | 17078153 | CG8949     | 7     | 95.5526 | 8.95  |
| chrX | 17091143 | 17091989 | CG16700    | 553   | 83.3132 | 11.06 |
| chrX | 17091143 | 17091989 | CG4991     | 553   | 83.3132 | 11.06 |
| chrX | 17107535 | 17107882 | CG5004     | 64    | 16.447  | 3.67  |
| chrX | 17147738 | 17148571 | RpS5a      | 78    | 29.8085 | 5.46  |
| chrX | 17148891 | 17149417 | CG5010     | 32    | 27.5697 | 5.55  |
| chrX | 17159872 | 17160820 | baz        | 568   | 136.707 | 14.14 |
| chrX | 17164609 | 17165054 | baz        | 4837  | 48.6506 | 8.24  |
| chrX | 17165926 | 17166585 | baz        | 6402  | 14.8813 | 3.82  |
| chrX | 17170241 | 17171131 | baz        | 10758 | 316.742 | 34.76 |
| chrX | 17178473 | 17179007 | CR44026    | 4413  | 44.856  | 7.85  |
| chrX | 17299168 | 17300198 | Fim        | 798   | 107.426 | 10.30 |
| chrX | 17300476 | 17301339 | Fim        | 74    | 28.91   | 5.59  |
| chrX | 17301663 | 17302029 | Fim        | 38    | 28.3996 | 4.92  |
| chrX | 17302483 | 17303009 | CG5445     | 176   | 24.1122 | 4.89  |
| chrX | 17313256 | 17313813 | B-H2       | 1005  | 78.7724 | 9.46  |
| chrX | 17314127 | 17314820 | B-H2       | 195   | 99.7442 | 12.25 |
| chrX | 17345839 | 17346473 | B-H2       | 31652 | 83.9031 | 10.18 |
| chrX | 17349248 | 17349676 | CR43491    | 29564 | 40.2365 | 7.35  |
| chrX | 17397027 | 17397652 | B-H1       | 180   | 182.649 | 17.86 |
| chrX | 17423365 | 17423949 | CG5613     | 188   | 51.5514 | 8.54  |
| chrX | 17493794 | 17494284 | CR44692    | 2747  | 22.479  | 5.24  |
| chrX | 17506246 | 17507883 | CG43658    | 56    | 306.918 | 23.36 |
| chrX | 17531794 | 17532474 | CG43658    | 525   | 26.4968 | 5.76  |
| chrX | 17577488 | 17577971 | CR44124    | 963   | 84.1127 | 10.70 |
| chrX | 17578725 | 17579102 | Ankle2     | 80    | 9.83586 | 2.95  |
| chrX | 17579648 | 17580142 | CG12991    | 27    | 36.6575 | 5.65  |
| chrX | 17581560 | 17581989 | CG12991    | 1924  | 103.042 | 11.46 |
| chrX | 17611499 | 17611817 | X11L       | 11664 | 17.4341 | 4.57  |
| chrX | 17624974 | 17625816 | stas       | 2673  | 47.0783 | 6.81  |
| chrX | 17627149 | 17627905 | stas       | 451   | 7.29525 | 2.57  |
| chrX | 17650825 | 17652611 | RhoGAPp190 | 263   | 316.742 | 23.52 |
| chrX | 17657247 | 17659553 | beta-Spec  | 1696  | 316.742 | 29.88 |
| chrX | 17680069 | 17680474 | chas       | 2659  | 74.7195 | 10.18 |
| chrX | 17682631 | 17683180 | chas       | 11    | 40.2461 | 7.24  |
| chrX | 17683534 | 17683923 | chas       | 799   | 62.376  | 9.46  |
| chrX | 17694076 | 17695001 | chas       | 127   | 48.3816 | 7.62  |
| chrX | 17697989 | 17699940 | chas       | 49    | 314.753 | 21.65 |
| chrX | 17702700 | 17703034 | CG8188     | 111   | 13.4534 | 3.61  |
| chrX | 17709872 | 17711182 | CG42684    | 825   | 134.897 | 14.36 |
| chrX | 17722830 | 17723511 | CG42684    | 156   | 46.6065 | 6.64  |
| chrX | 17726074 | 17726443 | CG42684    | 3084  | 30.6062 | 6.26  |
| chrX | 17733704 | 17734160 | CG42684    | 4485  | 120.529 | 13.87 |

|      |          |          |           |       |         |       |
|------|----------|----------|-----------|-------|---------|-------|
| chrX | 17737950 | 17739443 | CG42684   | 786   | 154.936 | 17.48 |
| chrX | 17742509 | 17743122 | CG42684   | 4495  | 164.677 | 15.60 |
| chrX | 17767967 | 17768784 | unc-4     | 194   | 316.742 | 28.98 |
| chrX | 17788951 | 17790038 | OdsH      | 1340  | 150.777 | 17.12 |
| chrX | 17802070 | 17802756 | OdsH      | 11513 | 15.7831 | 3.90  |
| chrX | 17826560 | 17827665 | Socs16D   | 370   | 316.742 | 24.33 |
| chrX | 17830499 | 17831237 | CG6398    | 79    | 150.165 | 15.23 |
| chrX | 17830499 | 17831237 | CR44691   | 188   | 150.165 | 15.23 |
| chrX | 17834000 | 17834356 | CR44691   | 3099  | 18.0702 | 4.65  |
| chrX | 17839494 | 17840075 | e(y)1     | 2284  | 30.5289 | 5.95  |
| chrX | 17856841 | 17857334 | CG6762    | 27    | 14.7928 | 3.69  |
| chrX | 17871021 | 17871531 | mnb       | 3774  | 71.5856 | 9.55  |
| chrX | 17877945 | 17879920 | mnb       | 3694  | 316.742 | 32.87 |
| chrX | 17880407 | 17880938 | CG12985   | 3000  | 89.9897 | 9.86  |
| chrX | 17881399 | 17881968 | CG12985   | 2113  | 40.6205 | 5.98  |
| chrX | 17885534 | 17887668 | mnb       | 484   | 188.351 | 15.74 |
| chrX | 17907582 | 17908038 | Vps4      | 8     | 8.525   | 2.74  |
| chrX | 17910621 | 17911742 | CG6847    | 583   | 198.265 | 18.89 |
| chrX | 17963019 | 17964276 | Sh        | 3722  | 77.363  | 11.03 |
| chrX | 17966917 | 17967475 | Sh        | 28    | 21.5412 | 4.85  |
| chrX | 17995595 | 17995967 | Sh        | 195   | 18.774  | 4.75  |
| chrX | 17997246 | 17997530 | Sh        | 1782  | 16.0475 | 4.37  |
| chrX | 18018818 | 18019079 | Sh        | 3741  | 10.3226 | 3.48  |
| chrX | 18023638 | 18024147 | CG6867    | 7     | 50.4975 | 8.30  |
| chrX | 18063236 | 18063716 | Sh        | 305   | 18.8588 | 4.77  |
| chrX | 18084900 | 18085665 | CG7536    | 11    | 17.608  | 4.06  |
| chrX | 18091248 | 18091525 | scu       | 159   | 14.8275 | 3.75  |
| chrX | 18101054 | 18101379 | CG7192    | 83    | 16.5691 | 3.84  |
| chrX | 18136576 | 18137933 | ari-1     | 58    | 127.74  | 11.60 |
| chrX | 18154906 | 18155540 | Frq1      | 309   | 20.3193 | 4.97  |
| chrX | 18214433 | 18214839 | Him       | 5212  | 22.2306 | 5.09  |
| chrX | 18243175 | 18244213 | upd2      | 254   | 316.742 | 30.78 |
| chrX | 18275822 | 18277012 | upd3      | 939   | 104.47  | 13.41 |
| chrX | 18282293 | 18282950 | upd3      | 5333  | 185.156 | 17.54 |
| chrX | 18312381 | 18313146 | CR45609   | 839   | 316.742 | 48.50 |
| chrX | 18318802 | 18319156 | CG6023    | 2213  | 39.3302 | 7.25  |
| chrX | 18319901 | 18320338 | CG6023    | 1111  | 9.89413 | 2.93  |
| chrX | 18320611 | 18321650 | CG6023    | 322   | 209.043 | 18.81 |
| chrX | 18365882 | 18369118 | CrebB     | 107   | 238.274 | 19.82 |
| chrX | 18369750 | 18370133 | CR43686   | 156   | 25.5054 | 5.26  |
| chrX | 18370827 | 18371871 | CrebB     | 18    | 316.742 | 27.10 |
| chrX | 18374391 | 18375050 | CrebB     | 3460  | 70.1728 | 8.46  |
| chrX | 18386065 | 18386627 | Tsf1      | 784   | 45.1666 | 6.71  |
| chrX | 18387640 | 18388008 | Tsf1      | 56    | 25.1395 | 5.43  |
| chrX | 18404355 | 18405268 | CG32549   | 89    | 316.742 | 36.96 |
| chrX | 18406581 | 18406992 | CG32549   | 2237  | 33.8473 | 5.95  |
| chrX | 18409469 | 18410467 | CG32549   | 82    | 101.245 | 10.01 |
| chrX | 18479369 | 18480030 | CG32547   | 260   | 84.3983 | 11.15 |
| chrX | 18483409 | 18484142 | Hayan     | 68    | 187.125 | 15.67 |
| chrX | 18486552 | 18487231 | psh       | 14    | 181.681 | 18.85 |
| chrX | 18489334 | 18490050 | CG15046   | 93    | 316.742 | 38.29 |
| chrX | 18499523 | 18499917 | GalNAc-T2 | 167   | 13.0285 | 3.37  |
| chrX | 18506826 | 18507337 | Wnt5      | 1738  | 76.5372 | 9.27  |
| chrX | 18512091 | 18512622 | Ggt-1     | 32    | 35.2316 | 5.82  |
| chrX | 18515329 | 18516893 | Aats-his  | 647   | 64.7459 | 7.91  |
| chrX | 18515329 | 18516893 | Bx        | 647   | 64.7459 | 7.91  |
| chrX | 18515329 | 18516893 | Aats-his  | 647   | 64.7459 | 7.91  |
| chrX | 18534213 | 18535706 | Bx        | 150   | 316.742 | 33.42 |
| chrX | 18544164 | 18544525 | Bx        | 9636  | 20.1354 | 4.84  |
| chrX | 18545733 | 18547257 | Bx        | 11484 | 34.9991 | 5.86  |
| chrX | 18558402 | 18558714 | Bx        | 7729  | 14.7    | 4.17  |
| chrX | 18575189 | 18575608 | Bx        | 9199  | 12.8627 | 3.70  |
| chrX | 18587267 | 18587649 | CR43492   | 264   | 44.7029 | 7.81  |
| chrX | 18634622 | 18635118 | wgn       | 2     | 217.798 | 16.81 |
| chrX | 18636291 | 18636653 | wgn       | 1573  | 23.2208 | 4.92  |
| chrX | 18645946 | 18646295 | Rip11     | 1431  | 22.2685 | 4.94  |
| chrX | 18646737 | 18647726 | Rip11     | 288   | 117.329 | 11.42 |
| chrX | 18665784 | 18666209 | CR45514   | 79    | 23.3434 | 5.36  |
| chrX | 18679313 | 18679630 | CR45710   | 2679  | 10.3226 | 3.48  |
| chrX | 18692701 | 18693435 | Cyp18a1   | 188   | 25.6968 | 5.66  |
| chrX | 18789173 | 18790305 | S6KL      | 60    | 84.8759 | 9.81  |
| chrX | 18793711 | 18794008 | Atg101    | 2104  | 7.56868 | 2.93  |
| chrX | 18797510 | 18797869 | bnb       | 30    | 29.8347 | 5.88  |
| chrX | 18802841 | 18803192 | CR44841   | 3296  | 22.4872 | 5.07  |
| chrX | 18806422 | 18806795 | CG7058    | 113   | 53.5107 | 8.74  |

|      |          |          |             |       |         |       |
|------|----------|----------|-------------|-------|---------|-------|
| chrX | 18813010 | 18813848 | CG42450     | 74    | 43.9209 | 7.75  |
| chrX | 18814327 | 18814658 | CG42450     | 1137  | 13.3929 | 3.97  |
| chrX | 18832224 | 18833108 | Pvf1        | 154   | 316.742 | 47.41 |
| chrX | 18843450 | 18843803 | CG34422     | 67    | 21.5869 | 4.51  |
| chrX | 18848421 | 18848712 | CG7280      | 30    | 11.9067 | 3.71  |
| chrX | 18857299 | 18857815 | CG7322      | 97    | 109.078 | 12.33 |
| chrX | 18863805 | 18865320 | CG34401     | 1074  | 77.7171 | 9.70  |
| chrX | 18884590 | 18884982 | CG7332      | 253   | 16.2083 | 4.05  |
| chrX | 18899567 | 18900678 | CG7378      | 105   | 226.604 | 20.26 |
| chrX | 18902547 | 18902975 | CG7378      | 2288  | 23.7462 | 5.11  |
| chrX | 18905273 | 18905850 | CG7378      | 5374  | 7.05037 | 2.88  |
| chrX | 18929052 | 18929406 | CG43759     | 1087  | 22.7445 | 5.05  |
| chrX | 18937839 | 18938539 | CG43759     | 7639  | 18.8665 | 4.61  |
| chrX | 19146638 | 19146912 | RhoGAP18B   | 6692  | 16.0475 | 4.37  |
| chrX | 19152949 | 19156244 | RhoGAP18B   | 359   | 316.742 | 38.82 |
| chrX | 19167268 | 19167604 | RhoGAP18B   | 373   | 30.6062 | 6.26  |
| chrX | 19168074 | 19168406 | mir-4959    | 1019  | 22.2685 | 4.94  |
| chrX | 19174747 | 19175132 | CG33939     | 58    | 21.1897 | 4.62  |
| chrX | 19187567 | 19188258 | Mec2        | 93    | 114.096 | 13.03 |
| chrX | 19201090 | 19201845 | CG7990      | 134   | 13.3929 | 3.97  |
| chrX | 19220387 | 19220685 | CG7884      | 88    | 18.1418 | 4.67  |
| chrX | 19248476 | 19248964 | Hs3st-B     | 37    | 35.9255 | 6.38  |
| chrX | 19259898 | 19260392 | rictor      | 228   | 58.4945 | 9.24  |
| chrX | 19260667 | 19261317 | rictor      | 384   | 28.0078 | 5.93  |
| chrX | 19261874 | 19262276 | Vav         | 279   | 11.0815 | 3.38  |
| chrX | 19297637 | 19299163 | CG8034      | 637   | 316.742 | 25.71 |
| chrX | 19315500 | 19315983 | out         | 6376  | 180.892 | 17.84 |
| chrX | 19317203 | 19317762 | out         | 4553  | 52.7684 | 7.50  |
| chrX | 19321733 | 19324288 | out         | 490   | 316.742 | 24.33 |
| chrX | 19348156 | 19348574 | nAChRalpha7 | 60    | 17.4146 | 4.13  |
| chrX | 19353017 | 19354006 | kek5        | 509   | 316.742 | 27.18 |
| chrX | 19360938 | 19361593 | kek5        | 8114  | 316.742 | 23.66 |
| chrX | 19395103 | 19395417 | kek5        | 42114 | 8.5523  | 3.00  |
| chrX | 19398463 | 19398849 | kek5        | 45503 | 11.4211 | 3.12  |
| chrX | 19479921 | 19480797 | Nat1        | 426   | 19.4415 | 4.14  |
| chrX | 19479921 | 19480797 | mRpS14      | 171   | 19.4415 | 4.14  |
| chrX | 19479921 | 19480797 | Nat1        | 151   | 19.4415 | 4.14  |
| chrX | 19495390 | 19497225 | CG14200     | 1224  | 277.132 | 21.21 |
| chrX | 19495390 | 19497225 | Pfrx        | 1224  | 277.132 | 21.21 |
| chrX | 19495390 | 19497225 | CR44340     | 832   | 277.132 | 21.21 |
| chrX | 19495390 | 19497225 | Pfrx        | 54    | 277.132 | 21.21 |
| chrX | 19498004 | 19499368 | Pfrx        | 723   | 100.754 | 11.17 |
| chrX | 19503342 | 19503913 | Pfrx        | 836   | 82.3699 | 10.86 |
| chrX | 19504213 | 19504615 | Pfrx        | 49    | 15.0743 | 3.69  |
| chrX | 19505779 | 19506207 | Pfrx        | 108   | 57.2932 | 8.49  |
| chrX | 19520968 | 19523035 | I(1)G0156   | 1063  | 43.2617 | 6.69  |
| chrX | 19520968 | 19523035 | CoRest      | 775   | 43.2617 | 6.69  |
| chrX | 19546084 | 19547031 | CG32532     | 630   | 23.3434 | 5.36  |
| chrX | 19565292 | 19565800 | Grip84      | 107   | 49.6896 | 7.02  |
| chrX | 19578363 | 19579873 | Tao         | 431   | 24.8752 | 4.59  |
| chrX | 19597756 | 19598125 | RpS10b      | 33    | 7.89471 | 2.87  |
| chrX | 19604336 | 19604669 | CG14207     | 722   | 28.658  | 5.99  |
| chrX | 19605055 | 19605441 | CG14207     | 43    | 33.0785 | 5.43  |
| chrX | 19605852 | 19606217 | CG14207     | 766   | 13.1132 | 3.48  |
| chrX | 19608001 | 19608734 | CG14207     | 1721  | 90.1    | 10.41 |
| chrX | 19631234 | 19632028 | CG14212     | 5822  | 316.742 | 25.66 |
| chrX | 19636829 | 19638861 | e(y)3       | 1247  | 121.065 | 11.00 |
| chrX | 19636829 | 19638861 | Rcd-1       | 1644  | 121.065 | 11.00 |
| chrX | 19643310 | 19643584 | Sec61gamma  | 143   | 10.8303 | 3.17  |
| chrX | 19652234 | 19652551 | Ranbp21     | 89    | 9.05003 | 2.90  |
| chrX | 19652234 | 19652551 | CG14215     | 54    | 9.05003 | 2.90  |
| chrX | 19662700 | 19663838 | CG14223     | 303   | 316.742 | 31.03 |
| chrX | 19665442 | 19666220 | Ssu72       | 1334  | 245.399 | 19.98 |
| chrX | 19667035 | 19668877 | Zw          | 1195  | 96.2193 | 10.39 |
| chrX | 19667035 | 19668877 | CR44512     | 700   | 96.2193 | 10.39 |
| chrX | 19669426 | 19669852 | Zw          | 205   | 12.6166 | 3.59  |
| chrX | 19681494 | 19682177 | dome        | 1547  | 25.3684 | 4.87  |
| chrX | 19682732 | 19684209 | dome        | 390   | 316.742 | 46.59 |
| chrX | 19682732 | 19684209 | Ubqn        | 679   | 316.742 | 46.59 |
| chrX | 19693172 | 19693463 | Mer         | 191   | 9.73133 | 3.10  |
| chrX | 19696895 | 19697896 | Cdc42       | 23    | 107.291 | 11.63 |
| chrX | 19712560 | 19713055 | CR44889     | 45    | 31.5663 | 5.99  |
| chrX | 19712560 | 19713055 | meso18E     | 157   | 31.5663 | 5.99  |
| chrX | 19718270 | 19719065 | CG12531     | 379   | 98.4315 | 11.99 |
| chrX | 19735362 | 19735617 | CG14234     | 27    | 13.3263 | 3.95  |

|      |          |          |           |       |         |       |
|------|----------|----------|-----------|-------|---------|-------|
| chrX | 19744020 | 19744522 | COX6B     | 216   | 26.2963 | 5.05  |
| chrX | 19744020 | 19744522 | CG18809   | 71    | 26.2963 | 5.05  |
| chrX | 19744020 | 19744522 | COX6B     | 71    | 26.2963 | 5.05  |
| chrX | 19744020 | 19744522 | CG33932   | 166   | 26.2963 | 5.05  |
| chrX | 19744020 | 19744522 | Rpp20     | 166   | 26.2963 | 5.05  |
| chrX | 19744020 | 19744522 | CG33932   | 166   | 26.2963 | 5.05  |
| chrX | 19744020 | 19744522 | Rpp20     | 166   | 26.2963 | 5.05  |
| chrX | 19750642 | 19751304 | Pmp70     | 286   | 140.598 | 14.04 |
| chrX | 19753858 | 19755177 | Pmp70     | 612   | 223.089 | 19.94 |
| chrX | 19846774 | 19847382 | pico      | 1317  | 36.9723 | 6.42  |
| chrX | 19847943 | 19848743 | pico      | 11    | 222.824 | 17.07 |
| chrX | 19850863 | 19852438 | pico      | 649   | 183.298 | 13.99 |
| chrX | 19850863 | 19852438 | Nup205    | 803   | 183.298 | 13.99 |
| chrX | 19865925 | 19867345 | Hers      | 434   | 316.742 | 30.06 |
| chrX | 19874799 | 19875989 | Hers      | 290   | 109.404 | 13.38 |
| chrX | 19877040 | 19877468 | Hers      | 1537  | 78.4506 | 11.12 |
| chrX | 19886703 | 19888089 | Hers      | 308   | 316.742 | 27.08 |
| chrX | 19889284 | 19889601 | amn       | 558   | 14.5206 | 4.12  |
| chrX | 19961054 | 19961827 | Nep3      | 114   | 23.1387 | 4.76  |
| chrX | 20147794 | 20148286 | CG9572    | 49    | 115.134 | 14.30 |
| chrX | 20158832 | 20159990 | Rab35     | 733   | 316.742 | 32.02 |
| chrX | 20173229 | 20174117 | AnxB10    | 37    | 316.742 | 21.22 |
| chrX | 20236227 | 20236485 | sw        | 58    | 21.0144 | 4.88  |
| chrX | 20251235 | 20251690 | Rab10     | 209   | 13.8643 | 3.40  |
| chrX | 20253726 | 20254053 | Rab10     | 2579  | 21.487  | 5.00  |
| chrX | 20256886 | 20257214 | CG17065   | 45    | 17.9731 | 4.13  |
| chrX | 20330301 | 20330637 | CG1504    | 68    | 16.7357 | 4.47  |
| chrX | 20352440 | 20352702 | CG1504    | 22178 | 14.0411 | 4.07  |
| chrX | 20411611 | 20412062 | CG15459   | 1741  | 128.498 | 15.40 |
| chrX | 20419365 | 20420046 | Obp19d    | 424   | 6.59975 | 2.58  |
| chrX | 20430088 | 20430418 | mal       | 75    | 20.2224 | 4.55  |
| chrX | 20433799 | 20434714 | CG1695    | 510   | 26.5472 | 5.50  |
| chrX | 20436832 | 20437405 | CG1695    | 3128  | 67.4896 | 9.55  |
| chrX | 20468084 | 20468662 | GstT3     | 54    | 129.731 | 15.49 |
| chrX | 20483196 | 20483499 | CG15461   | 2781  | 18.1418 | 4.67  |
| chrX | 20488944 | 20489326 | RhoGAP19D | 2079  | 60.5212 | 9.44  |
| chrX | 20489640 | 20490006 | RhoGAP19D | 1379  | 63.4004 | 9.69  |
| chrX | 20510454 | 20510868 | RhoGAP19D | 22    | 10.1576 | 2.69  |
| chrX | 20511482 | 20511784 | CG1812    | 73    | 11.2051 | 3.04  |
| chrX | 20524566 | 20525325 | Tak1      | 240   | 24.1197 | 5.46  |
| chrX | 20656129 | 20657715 | Cyp6v1    | 43    | 316.742 | 25.38 |
| chrX | 20656129 | 20657715 | CR45466   | 470   | 316.742 | 25.38 |
| chrX | 20656129 | 20657715 | Cyp6v1    | 508   | 316.742 | 25.38 |
| chrX | 20656129 | 20657715 | CR45466   | 600   | 316.742 | 25.38 |
| chrX | 20760357 | 20760751 | CR43838   | 419   | 33.845  | 5.50  |
| chrX | 20924889 | 20925403 | shakB     | 109   | 44.856  | 7.85  |
| chrX | 21010260 | 21011149 | r-cup     | 14917 | 34.8887 | 6.75  |
| chrX | 21028120 | 21028433 | CG1532    | 87    | 24.7547 | 4.68  |
| chrX | 21035405 | 21035986 | Ntf-2     | 161   | 15.0084 | 3.97  |
| chrX | 21042493 | 21043393 | Mgstl     | 97    | 127.602 | 12.20 |
| chrX | 21045044 | 21045584 | Cbs       | 50    | 40.3169 | 6.47  |
| chrX | 21053080 | 21055533 | CG1518    | 521   | 316.742 | 28.84 |
| chrX | 21053080 | 21055533 | bves      | 87    | 316.742 | 28.84 |
| chrX | 21067355 | 21068601 | CG32512   | 104   | 197.663 | 19.99 |
| chrX | 21071587 | 21072260 | CG32512   | 4437  | 145.49  | 12.61 |
| chrX | 21120377 | 21120828 | CR44374   | 334   | 19.9502 | 4.56  |
| chrX | 21123697 | 21123973 | CG34120   | 208   | 10.8116 | 3.42  |
| chrX | 21127972 | 21128345 | CG34120   | 4207  | 10.3723 | 3.37  |
| chrX | 21214847 | 21215232 | CG32523   | 2783  | 14.0411 | 4.07  |
| chrX | 21231345 | 21232189 | CG32523   | 14082 | 57.4883 | 7.81  |
| chrX | 21280625 | 21281495 | CG32521   | 73    | 203.631 | 15.90 |
| chrX | 21306423 | 21307152 | CG1718    | 63    | 281.818 | 19.24 |
| chrX | 21319094 | 21319410 | CG33713   | 76    | 15.3953 | 3.76  |
| chrX | 21319094 | 21319410 | SLIRP1    | 76    | 15.3953 | 3.76  |
| chrX | 21319094 | 21319410 | CG33713   | 7     | 15.3953 | 3.76  |
| chrX | 21319094 | 21319410 | SLIRP1    | 7     | 15.3953 | 3.76  |
| chrX | 21323964 | 21324756 | Dd        | 304   | 20.2236 | 3.88  |
| chrX | 21323964 | 21324756 | CG1486    | 247   | 20.2236 | 3.88  |
| chrX | 21338049 | 21338625 | tty       | 655   | 35.3032 | 6.54  |
| chrX | 21339584 | 21339981 | tty       | 118   | 16.7966 | 4.33  |
| chrX | 21339584 | 21339981 | fiil      | 54    | 16.7966 | 4.33  |
| chrX | 21350135 | 21350836 | sol       | 51    | 13.3929 | 3.97  |
| chrX | 21358183 | 21358660 | 44075     | 74    | 15.4354 | 4.07  |
| chrX | 21366218 | 21369020 | bbx       | 187   | 292.689 | 20.15 |
| chrX | 21369344 | 21369807 | bbx       | 86    | 54.7871 | 7.17  |



|      |          |          |           |      |         |       |
|------|----------|----------|-----------|------|---------|-------|
| chrX | 21373878 | 21374558 | slgA      | 80   | 89.0802 | 9.33  |
| chrX | 21373878 | 21374558 | CR45611   | 186  | 89.0802 | 9.33  |
| chrX | 21375358 | 21375924 | slgA      | 249  | 199.079 | 18.40 |
| chrX | 21378435 | 21378755 | slgA      | 2507 | 15.163  | 3.82  |
| chrX | 21629546 | 21629968 | DIP1      | 531  | 8.54165 | 3.00  |
| chrX | 21634116 | 21634447 | flam      | 2388 | 52.5284 | 8.64  |
| chrX | 22449159 | 22449563 | CG14615   | 10   | 26.4968 | 5.76  |
| chrX | 22455764 | 22456999 | Usp2      | 109  | 51.2354 | 7.05  |
| chrX | 22478336 | 22478741 | CG12576   | 911  | 20.3795 | 4.66  |
| chrX | 22480724 | 22482045 | CG12576   | 723  | 114.186 | 11.34 |
| chrX | 22487106 | 22488479 | I(1)G0196 | 965  | 88.5078 | 8.16  |
| chrX | 22490653 | 22491800 | CR43493   | 603  | 208.461 | 20.74 |
| chrX | 22490653 | 22491800 | I(1)G0196 | 119  | 208.461 | 20.74 |
| chrX | 22539946 | 22540376 | CG17598   | 227  | 48.5443 | 7.45  |
| chrX | 22854983 | 22855471 | fog       | 85   | 211.496 | 19.76 |
| chrX | 22950024 | 22950385 | CG41106   | 4916 | 61.4394 | 6.35  |

**Supplementary Table 5** Rpd3 binding sites

The regions indicated by 'Start' and 'End' represent the called peak region, the results of which were indicated as 'Q score' and 'Fold enrichment'.

| Chromosome | Start   | End     | Gene Symbol       | Distance to TSS (bp) | Q score (-log <sub>10</sub> (q value)) | Fold enrichment |
|------------|---------|---------|-------------------|----------------------|----------------------------------------|-----------------|
| chr2L      | 72320   | 74246   | galectin          | 396                  | 15.5557                                | 3.36            |
| chr2L      | 72320   | 74246   | CR44987           | 1054                 | 15.5557                                | 3.36            |
| chr2L      | 72320   | 74246   | galectin          | 1346                 | 15.5557                                | 3.36            |
| chr2L      | 127740  | 129684  | CG3164            | 65                   | 16.7973                                | 3.46            |
| chr2L      | 158469  | 159458  | CG33635           | 426                  | 30.3276                                | 4.81            |
| chr2L      | 158469  | 159458  | spen              | 59                   | 30.3276                                | 4.81            |
| chr2L      | 160433  | 162171  | spen              | 1928                 | 16.4431                                | 3.59            |
| chr2L      | 246733  | 247126  | CR44218           | 1965                 | 19.8919                                | 3.95            |
| chr2L      | 250406  | 251200  | kis               | 15                   | 16.9888                                | 3.42            |
| chr2L      | 252025  | 252432  | Rpp30             | 54                   | 13.4834                                | 3.46            |
| chr2L      | 273218  | 274300  | mbm               | 172                  | 14.7199                                | 3.72            |
| chr2L      | 273218  | 274300  | CG11555           | 292                  | 14.7199                                | 3.72            |
| chr2L      | 276875  | 278204  | CG17078           | 127                  | 30.7884                                | 4.93            |
| chr2L      | 276875  | 278204  | smo               | 496                  | 30.7884                                | 4.93            |
| chr2L      | 282753  | 283462  | CG11601           | 89                   | 16.4388                                | 4.04            |
| chr2L      | 285247  | 285875  | CG3625            | 58                   | 19.9791                                | 3.83            |
| chr2L      | 295047  | 295606  | Hop               | 186                  | 12.6967                                | 3.08            |
| chr2L      | 297428  | 298615  | Pi3K21B           | 151                  | 29.5482                                | 4.78            |
| chr2L      | 309899  | 310479  | Plc21C            | 98                   | 11.4702                                | 3.02            |
| chr2L      | 377674  | 378390  | al                | 137                  | 19.3012                                | 4.70            |
| chr2L      | 414129  | 415684  | AP-2alpha         | 264                  | 20.8154                                | 3.97            |
| chr2L      | 414129  | 415684  | ebi               | 25                   | 20.8154                                | 3.97            |
| chr2L      | 419838  | 421715  | RpLP1             | 162                  | 24.478                                 | 4.17            |
| chr2L      | 419838  | 421715  | CG11885           | 1337                 | 24.478                                 | 4.17            |
| chr2L      | 430872  | 431822  | ex                | 54                   | 21.5451                                | 4.29            |
| chr2L      | 471537  | 472619  | CG4297            | 6                    | 29.2808                                | 4.34            |
| chr2L      | 478740  | 480262  | cbt               | 40                   | 72.5606                                | 7.23            |
| chr2L      | 523305  | 523959  | ush               | 85                   | 35.6204                                | 5.06            |
| chr2L      | 541427  | 542643  | lwr               | 149                  | 25.3044                                | 4.71            |
| chr2L      | 544090  | 544781  | Spp               | 147                  | 15.4097                                | 3.66            |
| chr2L      | 559427  | 560471  | Tspo              | 43                   | 19.8093                                | 3.85            |
| chr2L      | 559427  | 560471  | rempA             | 656                  | 19.8093                                | 3.85            |
| chr2L      | 567683  | 568930  | Nle               | 116                  | 23.1472                                | 4.54            |
| chr2L      | 567683  | 568930  | CG2807            | 334                  | 23.1472                                | 4.54            |
| chr2L      | 819093  | 820536  | CG3876            | 658                  | 23.0519                                | 4.58            |
| chr2L      | 819093  | 820536  | Clp               | 203                  | 23.0519                                | 4.58            |
| chr2L      | 825144  | 826779  | CG3862            | 266                  | 21.6471                                | 3.90            |
| chr2L      | 825144  | 826779  | dock              | 159                  | 21.6471                                | 3.90            |
| chr2L      | 850159  | 851230  | CR44060           | 250                  | 27.7017                                | 4.80            |
| chr2L      | 850159  | 851230  | drongo            | 120                  | 27.7017                                | 4.80            |
| chr2L      | 852251  | 853282  | CG4291            | 239                  | 35.9999                                | 5.22            |
| chr2L      | 852251  | 853282  | kraken            | 122                  | 35.9999                                | 5.22            |
| chr2L      | 865310  | 866438  | snRNA:Me28S-U123C | 608                  | 15.7576                                | 3.64            |
| chr2L      | 865310  | 866438  | aru               | 240                  | 15.7576                                | 3.64            |
| chr2L      | 866812  | 868466  | aru               | 77                   | 38.1834                                | 5.95            |
| chr2L      | 1077490 | 1078431 | S                 | 185                  | 33.2559                                | 4.76            |
| chr2L      | 1077490 | 1078431 | ast               | 53                   | 33.2559                                | 4.76            |
| chr2L      | 1107876 | 1108674 | mtRNAPol          | 91                   | 76.7397                                | 7.27            |
| chr2L      | 1107876 | 1108674 | CG14339           | 257                  | 76.7397                                | 7.27            |

|       |         |         |         |      |         |      |
|-------|---------|---------|---------|------|---------|------|
| chr2L | 1117859 | 1119416 | Pino    | 200  | 12.5755 | 3.19 |
| chr2L | 1128249 | 1129799 | Pino    | 122  | 29.2758 | 5.27 |
| chr2L | 1128249 | 1129799 | CG4552  | 484  | 29.2758 | 5.27 |
| chr2L | 1157337 | 1158289 | capt    | 204  | 38.487  | 4.99 |
| chr2L | 1158608 | 1159377 | Tango14 | 192  | 25.6982 | 4.61 |
| chr2L | 1158608 | 1159377 | CR43767 | 503  | 25.6982 | 4.61 |
| chr2L | 1164298 | 1164971 | IntS14  | 204  | 14.4125 | 3.70 |
| chr2L | 1169519 | 1170560 | Plap    | 143  | 21.2132 | 4.64 |
| chr2L | 1169519 | 1170560 | CG31922 | 381  | 21.2132 | 4.64 |
| chr2L | 1169519 | 1170560 | Plap    | 566  | 21.2132 | 4.64 |
| chr2L | 1420214 | 1420666 | robo2   | 53   | 16.8296 | 3.85 |
| chr2L | 1610764 | 1611703 | CG31935 | 104  | 16.3945 | 3.72 |
| chr2L | 1610764 | 1611703 | CG14352 | 356  | 16.3945 | 3.72 |
| chr2L | 1613483 | 1614368 | RFeSP   | 98   | 19.2849 | 3.88 |
| chr2L | 1644388 | 1644775 | CR45695 | 2636 | 12.1351 | 3.61 |
| chr2L | 1709774 | 1711177 | CG17660 | 174  | 28.9759 | 5.08 |
| chr2L | 1709774 | 1711177 | mRpL48  | 134  | 28.9759 | 5.08 |
| chr2L | 1714362 | 1716151 | fritz   | 199  | 13.0377 | 3.41 |
| chr2L | 1722500 | 1724601 | Rim2    | 106  | 43.8516 | 6.30 |
| chr2L | 1751096 | 1752259 | CG17712 | 135  | 11.783  | 3.47 |
| chr2L | 1884610 | 1884993 | CG7337  | 150  | 20.2246 | 3.91 |
| chr2L | 1902889 | 1903421 | CG7337  | 8662 | 11.4242 | 3.24 |
| chr2L | 1911695 | 1911964 | CG7337  | 116  | 13.0103 | 3.40 |
| chr2L | 1972661 | 1973271 | Der-1   | 1038 | 13.4627 | 3.70 |
| chr2L | 1973954 | 1974851 | Der-1   | 196  | 24.1656 | 4.21 |
| chr2L | 1987250 | 1987946 | Got2    | 108  | 44.5065 | 5.23 |
| chr2L | 2037504 | 2039068 | Su(dx)  | 123  | 38.8667 | 5.44 |
| chr2L | 2144663 | 2145218 | tho2    | 272  | 38.4074 | 5.72 |
| chr2L | 2151714 | 2152260 | AIF     | 256  | 12.7602 | 3.19 |
| chr2L | 2168902 | 2169505 | aop     | 7583 | 12.8637 | 3.51 |
| chr2L | 2178067 | 2178869 | aop     | 42   | 33.4869 | 4.43 |
| chr2L | 2191511 | 2192688 | CG10874 | 97   | 16.5352 | 3.61 |
| chr2L | 2193382 | 2193904 | CG34172 | 631  | 65.5038 | 7.66 |
| chr2L | 2196365 | 2198316 | CG34172 | 1204 | 35.3983 | 4.88 |
| chr2L | 2198700 | 2199031 | CG34172 | 946  | 10.2141 | 3.02 |
| chr2L | 2199685 | 2200547 | CG34172 | 2403 | 19.3052 | 3.89 |
| chr2L | 2201294 | 2203604 | CG31668 | 3478 | 36.7097 | 5.27 |
| chr2L | 2216634 | 2217889 | CG42371 | 111  | 28.4603 | 4.76 |
| chr2L | 2216634 | 2217889 | CG15386 | 111  | 28.4603 | 4.76 |
| chr2L | 2216634 | 2217889 | mio     | 68   | 28.4603 | 4.76 |
| chr2L | 2221816 | 2222430 | papi    | 35   | 22.7821 | 4.12 |
| chr2L | 2362235 | 2365895 | Rab5    | 314  | 27.3933 | 4.69 |
| chr2L | 2362235 | 2365895 | Axud1   | 937  | 27.3933 | 4.69 |
| chr2L | 2375109 | 2376639 | CR44982 | 784  | 46.9461 | 6.33 |
| chr2L | 2375109 | 2376639 | Atxn7   | 34   | 46.9461 | 6.33 |
| chr2L | 2427957 | 2429162 | dpp     | 14   | 9.23195 | 3.09 |
| chr2L | 2492231 | 2493395 | Slh     | 329  | 23.3105 | 3.71 |
| chr2L | 2492231 | 2493395 | oaf     | 46   | 23.3105 | 3.71 |
| chr2L | 2584691 | 2585600 | Drp1    | 126  | 13.0517 | 3.33 |
| chr2L | 2747850 | 2748787 | Pgk     | 49   | 36.6381 | 5.61 |
| chr2L | 2749311 | 2751615 | Pgk     | 274  | 14.2988 | 3.12 |
| chr2L | 2752147 | 2754633 | Bacc    | 513  | 42.583  | 5.30 |
| chr2L | 2752147 | 2754633 | Pgk     | 244  | 42.583  | 5.30 |
| chr2L | 2752147 | 2754633 | Bacc    | 80   | 42.583  | 5.30 |
| chr2L | 2759139 | 2760443 | Snapin  | 193  | 19.9342 | 3.91 |
| chr2L | 2759139 | 2760443 | CG9960  | 193  | 19.9342 | 3.91 |

|       |         |         |                     |      |         |       |
|-------|---------|---------|---------------------|------|---------|-------|
| chr2L | 2759139 | 2760443 | Trn-SR              | 439  | 19.9342 | 3.91  |
| chr2L | 2765165 | 2766680 | CG3077              | 766  | 27.4579 | 4.87  |
| chr2L | 2765165 | 2766680 | aph-1               | 199  | 27.4579 | 4.87  |
| chr2L | 2767447 | 2768566 | Taf10b              | 85   | 13.4155 | 3.32  |
| chr2L | 2767447 | 2768566 | Taf10               | 41   | 13.4155 | 3.32  |
| chr2L | 2855514 | 2857459 | CG3104              | 377  | 35.8458 | 4.99  |
| chr2L | 2855514 | 2857459 | RpS21               | 45   | 35.8458 | 4.99  |
| chr2L | 2855514 | 2857459 | CG2991              | 1008 | 35.8458 | 4.99  |
| chr2L | 2873718 | 2875617 | CG31694             | 205  | 24.5309 | 4.46  |
| chr2L | 2873718 | 2875617 | CG8814              | 605  | 24.5309 | 4.46  |
| chr2L | 2877851 | 2879462 | Prx6005             | 519  | 24.1296 | 4.12  |
| chr2L | 2877851 | 2879462 | CG31950             | 232  | 24.1296 | 4.12  |
| chr2L | 2877851 | 2879462 | betaggt-II          | 360  | 24.1296 | 4.12  |
| chr2L | 2884346 | 2885421 | NTPase              | 54   | 50.5133 | 6.63  |
| chr2L | 2885745 | 2886809 | NTPase              | 156  | 22.7821 | 4.12  |
| chr2L | 2885745 | 2886809 | lilli               | 78   | 22.7821 | 4.12  |
| chr2L | 2955992 | 2957022 | Rbp9                | 9    | 9.51149 | 3.07  |
| chr2L | 2992599 | 2993758 | okr                 | 469  | 26.8997 | 4.56  |
| chr2L | 2992599 | 2993758 | CG3558              | 256  | 26.8997 | 4.56  |
| chr2L | 3145303 | 3145866 | ND-B14.5B           | 109  | 15.7576 | 3.64  |
| chr2L | 3163617 | 3164015 | Hydr2               | 141  | 24.559  | 5.40  |
| chr2L | 3301771 | 3303814 | CG9663              | 956  | 27.9865 | 4.97  |
| chr2L | 3354625 | 3355123 | E23                 | 45   | 17.1334 | 3.86  |
| chr2L | 3465496 | 3466862 | msl-2               | 254  | 12.7616 | 3.31  |
| chr2L | 3465496 | 3466862 | ND-PDSW             | 210  | 12.7616 | 3.31  |
| chr2L | 3477985 | 3480135 | Thor                | 15   | 21.6997 | 3.72  |
| chr2L | 3507085 | 3507521 | tim                 | 111  | 14.7932 | 3.17  |
| chr2L | 3631725 | 3632870 | for                 | 75   | 31.0824 | 5.62  |
| chr2L | 3656672 | 3657015 | for                 | 64   | 32.7114 | 5.65  |
| chr2L | 3712645 | 3713839 | CG31955             | 362  | 17.797  | 3.94  |
| chr2L | 3712645 | 3713839 | CG2818              | 108  | 17.797  | 3.94  |
| chr2L | 3771083 | 3772324 | bowl                | 108  | 13.6339 | 3.69  |
| chr2L | 3803123 | 3804139 | Reph                | 347  | 17.7161 | 3.62  |
| chr2L | 3805496 | 3806630 | Reph                | 33   | 33.7434 | 5.50  |
| chr2L | 3812942 | 3813597 | CG3407              | 49   | 19.4031 | 3.78  |
| chr2L | 3872016 | 3872949 | CG31957             | 228  | 42.6021 | 6.45  |
| chr2L | 4031273 | 4031885 | ed                  | 82   | 14.4751 | 3.52  |
| chr2L | 4197175 | 4198173 | CG3714              | 221  | 12.5115 | 3.08  |
| chr2L | 4226442 | 4227037 | CG3702              | 98   | 13.7586 | 3.38  |
| chr2L | 4332678 | 4334486 | Atet                | 67   | 58.3048 | 8.15  |
| chr2L | 4393482 | 4394760 | CG3652              | 423  | 17.678  | 4.08  |
| chr2L | 4393482 | 4394760 | l(2)k05819          | 104  | 17.678  | 4.08  |
| chr2L | 4457375 | 4458428 | 3'noRNA:Me18S-C183' | 582  | 40.7365 | 5.85  |
| chr2L | 4457375 | 4458428 | RpL27A              | 61   | 40.7365 | 5.85  |
| chr2L | 4459231 | 4460255 | mRpL27              | 214  | 15.382  | 3.66  |
| chr2L | 4459231 | 4460255 | CG15435             | 340  | 15.382  | 3.66  |
| chr2L | 4476750 | 4477187 | ine                 | 34   | 23.4616 | 5.07  |
| chr2L | 4591785 | 4592261 | dpy                 | 5    | 24.6768 | 5.52  |
| chr2L | 4594738 | 4595179 | dpy                 | 82   | 35.6212 | 5.38  |
| chr2L | 4614087 | 4614727 | dpy                 | 147  | 23.445  | 5.14  |
| chr2L | 4810061 | 4811089 | CR45297             | 1682 | 109.174 | 11.51 |
| chr2L | 4811395 | 4812060 | CR45297             | 153  | 20.0579 | 3.93  |
| chr2L | 4837073 | 4838646 | tank                | 197  | 23.4245 | 4.05  |
| chr2L | 4837073 | 4838646 | CG12194             | 544  | 23.4245 | 4.05  |
| chr2L | 4846628 | 4848354 | mxt                 | 127  | 13.233  | 3.32  |
| chr2L | 4846628 | 4848354 | CG11927             | 597  | 13.233  | 3.32  |

|       |         |         |           |      |         |       |
|-------|---------|---------|-----------|------|---------|-------|
| chr2L | 4849967 | 4850385 | mRpS2     | 151  | 9.71429 | 3.12  |
| chr2L | 4891900 | 4892371 | CG3036    | 60   | 12.6879 | 3.34  |
| chr2L | 4928125 | 4928642 | hoe1      | 7    | 18.825  | 4.45  |
| chr2L | 4944919 | 4946271 | mRpL24    | 342  | 20.5596 | 3.89  |
| chr2L | 4944919 | 4946271 | betaggt-l | 125  | 20.5596 | 3.89  |
| chr2L | 4949321 | 4949815 | jet       | 195  | 20.4022 | 4.35  |
| chr2L | 4965653 | 4966361 | CG34125   | 435  | 11.9605 | 3.46  |
| chr2L | 4967176 | 4967806 | Trip1     | 233  | 12.5073 | 3.34  |
| chr2L | 4971016 | 4972303 | I(2)05714 | 363  | 13.5982 | 3.31  |
| chr2L | 4971016 | 4972303 | CG14043   | 147  | 13.5982 | 3.31  |
| chr2L | 4973748 | 4974594 | I(2)05714 | 213  | 20.28   | 4.32  |
| chr2L | 4973748 | 4974594 | mRpL28    | 159  | 20.28   | 4.32  |
| chr2L | 4976456 | 4977588 | Gmd       | 96   | 16.6352 | 3.59  |
| chr2L | 4976456 | 4977588 | CG3792    | 384  | 16.6352 | 3.59  |
| chr2L | 4980569 | 4982418 | CG8892    | 132  | 16.6443 | 3.37  |
| chr2L | 4980569 | 4982418 | CG34126   | 111  | 16.6443 | 3.37  |
| chr2L | 5009417 | 5010176 | Rtnl1     | 7    | 19.496  | 3.47  |
| chr2L | 5043078 | 5044044 | CG31650   | 363  | 15.2265 | 3.56  |
| chr2L | 5043078 | 5044044 | CG44001   | 252  | 15.2265 | 3.56  |
| chr2L | 5043078 | 5044044 | CG44000   | 252  | 15.2265 | 3.56  |
| chr2L | 5043078 | 5044044 | CG44001   | 252  | 15.2265 | 3.56  |
| chr2L | 5043078 | 5044044 | CG33995   | 252  | 15.2265 | 3.56  |
| chr2L | 5043078 | 5044044 | CG31650   | 487  | 15.2265 | 3.56  |
| chr2L | 5052064 | 5053220 | eIF-3p40  | 98   | 61.6356 | 6.90  |
| chr2L | 5052064 | 5053220 | CG14040   | 160  | 61.6356 | 6.90  |
| chr2L | 5052064 | 5053220 | eIF-3p40  | 412  | 61.6356 | 6.90  |
| chr2L | 5070877 | 5071965 | RpL37A    | 192  | 20.5163 | 4.92  |
| chr2L | 5070877 | 5071965 | CR45305   | 82   | 20.5163 | 4.92  |
| chr2L | 5096301 | 5096853 | CG4230    | 169  | 14.1855 | 3.24  |
| chr2L | 5107535 | 5109184 | Msp300    | 90   | 116.655 | 11.66 |
| chr2L | 5278939 | 5279569 | Bub1      | 201  | 19.3828 | 4.09  |
| chr2L | 5303226 | 5303957 | vri       | 2231 | 21.3578 | 4.61  |
| chr2L | 5314557 | 5315037 | CG14024   | 55   | 11.421  | 3.38  |
| chr2L | 5324661 | 5326880 | CR44985   | 1082 | 28.7933 | 4.99  |
| chr2L | 5324661 | 5326880 | Ncoa6     | 1262 | 28.7933 | 4.99  |
| chr2L | 5461111 | 5461882 | mid       | 239  | 28.3503 | 4.33  |
| chr2L | 5519352 | 5520801 | CG7382    | 670  | 15.0625 | 3.28  |
| chr2L | 5519352 | 5520801 | cl        | 307  | 15.0625 | 3.28  |
| chr2L | 5541625 | 5543759 | Hel25E    | 439  | 33.5262 | 5.66  |
| chr2L | 5541625 | 5543759 | Lam       | 25   | 33.5262 | 5.66  |
| chr2L | 5740662 | 5741161 | CG11147   | 75   | 12.1149 | 3.35  |
| chr2L | 5799177 | 5800405 | CG9171    | 63   | 35.5342 | 5.43  |
| chr2L | 5801345 | 5802626 | CG14005   | 167  | 17.4445 | 3.65  |
| chr2L | 5801345 | 5802626 | CG7239    | 411  | 17.4445 | 3.65  |
| chr2L | 5943579 | 5945296 | Gpdh      | 45   | 40.6741 | 5.38  |
| chr2L | 5945565 | 5946602 | Gpdh      | 2158 | 14.3258 | 3.63  |
| chr2L | 5949173 | 5949958 | CG9044    | 184  | 44.3212 | 6.17  |
| chr2L | 5979775 | 5981203 | chic      | 139  | 45.3174 | 5.24  |
| chr2L | 5981470 | 5983231 | eIF-4a    | 164  | 36.2081 | 5.14  |
| chr2L | 5986164 | 5987183 | ifc       | 146  | 25.4504 | 4.92  |
| chr2L | 5998474 | 5999713 | lid       | 227  | 27.8429 | 4.94  |
| chr2L | 6000177 | 6000775 | Tsp26A    | 214  | 22.1747 | 4.85  |
| chr2L | 6046922 | 6049318 | slmo      | 188  | 39.6662 | 5.68  |
| chr2L | 6046922 | 6049318 | CG12393   | 255  | 39.6662 | 5.68  |
| chr2L | 6046922 | 6049318 | CG34179   | 960  | 39.6662 | 5.68  |
| chr2L | 6046922 | 6049318 | slmo      | 960  | 39.6662 | 5.68  |

|       |         |         |              |      |         |      |
|-------|---------|---------|--------------|------|---------|------|
| chr2L | 6046922 | 6049318 | CG34179      | 960  | 39.6662 | 5.68 |
| chr2L | 6046922 | 6049318 | slmo         | 960  | 39.6662 | 5.68 |
| chr2L | 6050702 | 6051761 | CG9135       | 59   | 23.7979 | 4.85 |
| chr2L | 6068939 | 6069606 | CG13993      | 7    | 18.6029 | 4.10 |
| chr2L | 6070134 | 6071921 | CG9154       | 701  | 19.3727 | 4.14 |
| chr2L | 6070134 | 6071921 | Kr-h2        | 319  | 19.3727 | 4.14 |
| chr2L | 6078434 | 6079635 | CR9162       | 555  | 30.2527 | 4.47 |
| chr2L | 6082212 | 6083632 | Kr-h1        | 47   | 15.4841 | 3.08 |
| chr2L | 6098171 | 6099170 | CG9175       | 198  | 27.9616 | 4.90 |
| chr2L | 6125062 | 6125737 | Arpc4        | 270  | 15.191  | 4.06 |
| chr2L | 6323578 | 6324887 | PDZ-GEF      | 339  | 22.4931 | 3.83 |
| chr2L | 6337916 | 6339762 | Pez          | 232  | 22.5672 | 3.92 |
| chr2L | 6337916 | 6339762 | Cpr          | 68   | 22.5672 | 3.92 |
| chr2L | 6455052 | 6456896 | retm         | 120  | 20.4089 | 3.64 |
| chr2L | 6455052 | 6456896 | frj          | 242  | 20.4089 | 3.64 |
| chr2L | 6465472 | 6465913 | CG16947      | 66   | 15.9777 | 3.73 |
| chr2L | 6467452 | 6467851 | CG9531       | 8    | 12.3916 | 3.20 |
| chr2L | 6473362 | 6474021 | mmy          | 187  | 31.7094 | 4.92 |
| chr2L | 6476396 | 6477076 | CG9536       | 183  | 12.8698 | 3.33 |
| chr2L | 6478928 | 6482252 | Sec61alpha   | 278  | 44.0676 | 6.27 |
| chr2L | 6478928 | 6482252 | Daxx         | 75   | 44.0676 | 6.27 |
| chr2L | 6478928 | 6482252 | CR45463      | 77   | 44.0676 | 6.27 |
| chr2L | 6487953 | 6489826 | KFase        | 74   | 13.5778 | 3.39 |
| chr2L | 6487953 | 6489826 | epsilonCOP   | 548  | 13.5778 | 3.39 |
| chr2L | 6490369 | 6492068 | CG9548       | 404  | 42.224  | 6.31 |
| chr2L | 6490369 | 6492068 | CG31638      | 187  | 42.224  | 6.31 |
| chr2L | 6498426 | 6498949 | CG31637      | 78   | 24.6739 | 4.04 |
| chr2L | 6557818 | 6558425 | COX5B        | 190  | 22.9185 | 4.61 |
| chr2L | 6561029 | 6561735 | CG9596       | 85   | 11.4366 | 3.29 |
| chr2L | 6562095 | 6562738 | CG9596       | 16   | 12.6775 | 3.42 |
| chr2L | 6562095 | 6562738 | Ent2         | 19   | 12.6775 | 3.42 |
| chr2L | 6612649 | 6613379 | CG11050      | 1211 | 32.6178 | 4.55 |
| chr2L | 6647435 | 6649971 | CG31635      | 416  | 21.6959 | 4.12 |
| chr2L | 6647435 | 6649971 | Tango1       | 143  | 21.6959 | 4.12 |
| chr2L | 6673843 | 6674355 | CG34310      | 140  | 18.3627 | 3.86 |
| chr2L | 6683696 | 6684901 | Nhe3         | 139  | 22.7867 | 4.65 |
| chr2L | 6722809 | 6723446 | homer        | 159  | 43.9002 | 5.63 |
| chr2L | 6723882 | 6724942 | Liprin-alpha | 287  | 44.4018 | 6.06 |
| chr2L | 6786590 | 6787969 | nrv1         | 60   | 32.1995 | 4.80 |
| chr2L | 6794259 | 6795008 | nrv2         | 47   | 20.833  | 3.77 |
| chr2L | 6853997 | 6854526 | l(2)k09022   | 0    | 14.4751 | 3.52 |
| chr2L | 6913492 | 6914249 | Wee1         | 297  | 19.3781 | 4.26 |
| chr2L | 6918084 | 6918933 | nop5         | 48   | 28.8943 | 4.54 |
| chr2L | 6919371 | 6920304 | x16          | 513  | 16.6155 | 3.47 |
| chr2L | 6920654 | 6922337 | Hrb27C       | 70   | 20.8154 | 3.97 |
| chr2L | 6948275 | 6948909 | ihog         | 42   | 20.9064 | 4.79 |
| chr2L | 6949510 | 6950948 | Gas41        | 424  | 16.8251 | 4.25 |
| chr2L | 6949510 | 6950948 | SA           | 211  | 16.8251 | 4.25 |
| chr2L | 6966736 | 6967735 | smt3         | 10   | 16.9888 | 3.42 |
| chr2L | 6971179 | 6972052 | snRNP-U1-70K | 151  | 18.9749 | 3.83 |
| chr2L | 7026579 | 7028024 | CG31908      | 157  | 40.4123 | 5.40 |
| chr2L | 7026579 | 7028024 | CG3476       | 395  | 40.4123 | 5.40 |
| chr2L | 7031891 | 7033575 | Rab30        | 259  | 18.2727 | 3.67 |
| chr2L | 7031891 | 7033575 | Caper        | 145  | 18.2727 | 3.67 |
| chr2L | 7056147 | 7057135 | Mnn1         | 109  | 39.9996 | 6.52 |
| chr2L | 7219781 | 7220222 | CG13784      | 38   | 19.1359 | 3.48 |

|       |         |         |             |      |         |      |
|-------|---------|---------|-------------|------|---------|------|
| chr2L | 7412261 | 7412930 | chm         | 199  | 46.1596 | 6.86 |
| chr2L | 7418162 | 7418769 | CR43857     | 5185 | 13.9434 | 3.55 |
| chr2L | 7423454 | 7425210 | CR43857     | 37   | 29.6758 | 4.75 |
| chr2L | 7426999 | 7427663 | CG5261      | 234  | 11.0989 | 3.02 |
| chr2L | 7437378 | 7438215 | CG5973      | 43   | 15.7978 | 3.27 |
| chr2L | 7450966 | 7451314 | santa-maria | 77   | 12.8698 | 3.33 |
| chr2L | 7495463 | 7496487 | Ziz         | 54   | 25.2495 | 4.20 |
| chr2L | 7701388 | 7701835 | Tep2        | 15   | 25.6301 | 5.24 |
| chr2L | 7702188 | 7703266 | Tep3        | 29   | 11.5205 | 3.14 |
| chr2L | 7782764 | 7783258 | CG7154      | 100  | 29.8446 | 5.31 |
| chr2L | 7809442 | 7810828 | cdc14       | 44   | 30.659  | 5.33 |
| chr2L | 7826546 | 7827396 | Rack1       | 36   | 25.1121 | 4.36 |
| chr2L | 7827717 | 7829441 | mts         | 547  | 23.5825 | 3.85 |
| chr2L | 7885194 | 7886093 | SmE         | 12   | 10.9657 | 3.14 |
| chr2L | 7885194 | 7886093 | CG34132     | 64   | 10.9657 | 3.14 |
| chr2L | 7976472 | 7977037 | Snoo        | 132  | 10.2469 | 3.52 |
| chr2L | 7993906 | 7994354 | pes         | 70   | 19.6858 | 4.10 |
| chr2L | 7998747 | 7999515 | Sirup       | 89   | 33.9269 | 4.81 |
| chr2L | 7999839 | 8001027 | Sirup       | 1487 | 12.7356 | 3.44 |
| chr2L | 8009115 | 8009706 | CG12560     | 52   | 29.3214 | 5.15 |
| chr2L | 8030723 | 8032364 | Cka         | 98   | 17.8941 | 3.40 |
| chr2L | 8043289 | 8044052 | CG7466      | 166  | 17.3411 | 3.48 |
| chr2L | 8071155 | 8071733 | poe         | 130  | 23.157  | 3.97 |
| chr2L | 8072255 | 8073349 | MED20       | 206  | 18.0528 | 3.89 |
| chr2L | 8072255 | 8073349 | Trf         | 160  | 18.0528 | 3.89 |
| chr2L | 8082331 | 8084719 | CR45257     | 649  | 24.3601 | 4.48 |
| chr2L | 8082331 | 8084719 | Mcr         | 525  | 24.3601 | 4.48 |
| chr2L | 8082331 | 8084719 | Bsg         | 88   | 24.3601 | 4.48 |
| chr2L | 8162886 | 8163653 | Piezo       | 40   | 39.34   | 5.25 |
| chr2L | 8239364 | 8240233 | Pvr         | 94   | 21.3964 | 4.32 |
| chr2L | 8307661 | 8308945 | Ostgamma    | 145  | 19.218  | 4.17 |
| chr2L | 8307661 | 8308945 | CG7818      | 379  | 19.218  | 4.17 |
| chr2L | 8320197 | 8320875 | CG7787      | 24   | 8.67665 | 3.09 |
| chr2L | 8363882 | 8365587 | RpS13       | 62   | 51.8015 | 6.43 |
| chr2L | 8363882 | 8365587 | CSN8        | 320  | 51.8015 | 6.43 |
| chr2L | 8365881 | 8366651 | Pp2A-29B    | 250  | 27.1219 | 4.36 |
| chr2L | 8370341 | 8371115 | CG17292     | 78   | 29.1348 | 5.31 |
| chr2L | 8370341 | 8371115 | CR45341     | 63   | 29.1348 | 5.31 |
| chr2L | 8383566 | 8384899 | l(2)k12914  | 438  | 16.0949 | 3.96 |
| chr2L | 8383566 | 8384899 | CG13384     | 121  | 16.0949 | 3.96 |
| chr2L | 8402784 | 8404331 | fy          | 408  | 31.1443 | 4.35 |
| chr2L | 8402784 | 8404331 | emb         | 116  | 31.1443 | 4.35 |
| chr2L | 8402784 | 8404331 | CR44991     | 236  | 31.1443 | 4.35 |
| chr2L | 8415696 | 8417015 | Akap200     | 730  | 10.1684 | 3.01 |
| chr2L | 8511471 | 8512071 | CG13096     | 13   | 12.3916 | 3.20 |
| chr2L | 8527867 | 8528634 | lmgB        | 158  | 13.9982 | 3.77 |
| chr2L | 8527867 | 8528634 | lmgA        | 281  | 13.9982 | 3.77 |
| chr2L | 8527867 | 8528634 | lmgB        | 281  | 13.9982 | 3.77 |
| chr2L | 8527867 | 8528634 | lmgA        | 281  | 13.9982 | 3.77 |
| chr2L | 8527867 | 8528634 | lmgB        | 394  | 13.9982 | 3.77 |
| chr2L | 8527867 | 8528634 | lmgA        | 394  | 13.9982 | 3.77 |
| chr2L | 8708483 | 8709699 | Hnf4        | 195  | 12.3502 | 3.27 |
| chr2L | 8735428 | 8735918 | raw         | 50   | 15.5832 | 3.65 |
| chr2L | 8988956 | 8989517 | rost        | 13   | 15.2879 | 3.96 |
| chr2L | 9125610 | 9126003 | CG32982     | 79   | 10.4114 | 3.15 |
| chr2L | 9176066 | 9176678 | tai         | 56   | 17.3411 | 3.59 |

|       |          |          |            |      |         |      |
|-------|----------|----------|------------|------|---------|------|
| chr2L | 9333414  | 9333944  | Eaat1      | 78   | 24.5856 | 4.95 |
| chr2L | 9387475  | 9388393  | Aldh       | 201  | 33.7456 | 6.09 |
| chr2L | 9430864  | 9431916  | FucTB      | 641  | 10.4114 | 3.15 |
| chr2L | 9430864  | 9431916  | scat       | 289  | 10.4114 | 3.15 |
| chr2L | 9449115  | 9450131  | numb       | 57   | 31.1502 | 5.56 |
| chr2L | 9493687  | 9494986  | Gdi        | 261  | 33.6148 | 5.06 |
| chr2L | 9495381  | 9495815  | CG33298    | 80   | 16.0484 | 3.84 |
| chr2L | 9496108  | 9496770  | CG33298    | 1018 | 11.9547 | 3.08 |
| chr2L | 9613279  | 9614068  | Trx-2      | 79   | 38.0204 | 6.38 |
| chr2L | 9698615  | 9701190  | Pka-C1     | 25   | 41.3098 | 5.47 |
| chr2L | 9698615  | 9701190  | hoip       | 468  | 41.3098 | 5.47 |
| chr2L | 9698615  | 9701190  | pelo       | 1487 | 41.3098 | 5.47 |
| chr2L | 9705667  | 9706138  | CG31710    | 12   | 24.2448 | 3.98 |
| chr2L | 9710852  | 9711359  | CG4364     | 62   | 21.8608 | 4.65 |
| chr2L | 9757958  | 9759272  | zf30C      | 696  | 19.9791 | 3.83 |
| chr2L | 9762924  | 9764008  | Taf11      | 413  | 27.0287 | 4.74 |
| chr2L | 9762924  | 9764008  | und        | 141  | 27.0287 | 4.74 |
| chr2L | 9782135  | 9783366  | IP3K1      | 53   | 16.3486 | 3.26 |
| chr2L | 9790386  | 9791407  | CG4036     | 282  | 15.3751 | 3.41 |
| chr2L | 9890384  | 9891211  | CG34183    | 161  | 15.7359 | 3.39 |
| chr2L | 9890384  | 9891211  | CG4537     | 273  | 15.7359 | 3.39 |
| chr2L | 9897002  | 9897667  | RpS2       | 134  | 35.6017 | 6.49 |
| chr2L | 9911988  | 9913365  | Etl1       | 509  | 13.8173 | 3.24 |
| chr2L | 9911988  | 9913365  | Srp54      | 207  | 13.8173 | 3.24 |
| chr2L | 9915122  | 9915853  | yip2       | 123  | 20.2246 | 3.91 |
| chr2L | 9917373  | 9919280  | CG5885     | 126  | 30.3917 | 4.12 |
| chr2L | 9917373  | 9919280  | CG4598     | 567  | 30.3917 | 4.12 |
| chr2L | 9947156  | 9947737  | CG5853     | 21   | 37.2231 | 6.30 |
| chr2L | 9956755  | 9958321  | CG5846     | 513  | 19.5803 | 4.36 |
| chr2L | 9956755  | 9958321  | CG4658     | 401  | 19.5803 | 4.36 |
| chr2L | 9956755  | 9958321  | CG5846     | 295  | 19.5803 | 4.36 |
| chr2L | 9956755  | 9958321  | CG4658     | 238  | 19.5803 | 4.36 |
| chr2L | 9963438  | 9963768  | CG5850     | 193  | 9.85543 | 3.06 |
| chr2L | 9966650  | 9968453  | Dref       | 218  | 13.2533 | 3.08 |
| chr2L | 9966650  | 9968453  | RpL13      | 118  | 13.2533 | 3.08 |
| chr2L | 10003692 | 10004891 | CG4747     | 538  | 20.8513 | 4.27 |
| chr2L | 10009276 | 10011055 | Trp1       | 141  | 17.7161 | 3.62 |
| chr2L | 10200846 | 10201877 | Ripalpha   | 89   | 22.9909 | 3.98 |
| chr2L | 10200846 | 10201877 | RpL7       | 36   | 22.9909 | 3.98 |
| chr2L | 10220269 | 10222026 | Npc1a      | 360  | 24.5309 | 4.46 |
| chr2L | 10220269 | 10222026 | Prosalph6  | 226  | 24.5309 | 4.46 |
| chr2L | 10232500 | 10232792 | eEF1delta  | 145  | 14.1855 | 3.24 |
| chr2L | 10303212 | 10304209 | nmd        | 63   | 15.1939 | 3.41 |
| chr2L | 10311134 | 10312193 | l(2)SH0834 | 98   | 16.3088 | 3.95 |
| chr2L | 10331551 | 10332087 | CG5037     | 212  | 14.702  | 4.00 |
| chr2L | 10333773 | 10335247 | GATAd      | 269  | 17.72   | 3.93 |
| chr2L | 10375450 | 10376818 | CG33303    | 61   | 14.113  | 3.45 |
| chr2L | 10375450 | 10376818 | dpr19      | 471  | 14.113  | 3.45 |
| chr2L | 10408277 | 10408950 | RpS27A     | 4    | 16.0484 | 3.84 |
| chr2L | 10408277 | 10408950 | lp259      | 4    | 16.0484 | 3.84 |
| chr2L | 10430462 | 10431806 | Bug22      | 8    | 19.0787 | 4.04 |
| chr2L | 10430462 | 10431806 | TfIIIB     | 411  | 19.0787 | 4.04 |
| chr2L | 10474136 | 10474435 | RluA-1     | 90   | 17.1676 | 4.27 |
| chr2L | 10488057 | 10489217 | CG7456     | 149  | 22.4983 | 4.03 |
| chr2L | 10488057 | 10489217 | CG6144     | 220  | 22.4983 | 4.03 |
| chr2L | 10506516 | 10507595 | Myo31DF    | 58   | 20.1481 | 3.82 |



|       |          |          |           |      |         |      |
|-------|----------|----------|-----------|------|---------|------|
| chr2L | 10506516 | 10507595 | CG6094    | 359  | 20.1481 | 3.82 |
| chr2L | 10515965 | 10517656 | Fatp      | 42   | 31.7926 | 4.69 |
| chr2L | 10515965 | 10517656 | Lrr47     | 708  | 31.7926 | 4.69 |
| chr2L | 10735718 | 10736085 | Nup107    | 179  | 11.5289 | 3.37 |
| chr2L | 10743376 | 10744051 | CG6729    | 144  | 16.1486 | 3.72 |
| chr2L | 10756092 | 10756484 | CG17124   | 76   | 18.2465 | 3.59 |
| chr2L | 10769470 | 10770108 | CG6724    | 177  | 26.3442 | 5.40 |
| chr2L | 10800904 | 10801363 | CG31869   | 42   | 11.6017 | 3.37 |
| chr2L | 10841701 | 10842638 | CG6700    | 208  | 24.4817 | 4.31 |
| chr2L | 10849885 | 10851012 | CG43129   | 399  | 37.7304 | 5.61 |
| chr2L | 10849885 | 10851012 | porin     | 199  | 37.7304 | 5.61 |
| chr2L | 10856152 | 10856997 | Dnz1      | 158  | 22.3955 | 4.51 |
| chr2L | 10858461 | 10858940 | Stam      | 237  | 10.5404 | 3.01 |
| chr2L | 10967230 | 10968163 | CG33129   | 254  | 38.9571 | 6.02 |
| chr2L | 10975881 | 10977531 | ATPsynG   | 571  | 31.7231 | 5.83 |
| chr2L | 10975881 | 10977531 | SCAR      | 199  | 31.7231 | 5.83 |
| chr2L | 11003659 | 11004277 | RpL9      | 209  | 22.0143 | 4.08 |
| chr2L | 11004858 | 11005290 | Nup154    | 224  | 17.5212 | 4.10 |
| chr2L | 11057160 | 11058288 | Samuel    | 98   | 27.2386 | 5.36 |
| chr2L | 11066754 | 11067097 | Samuel    | 118  | 17.0389 | 3.89 |
| chr2L | 11106065 | 11107685 | Reps      | 34   | 30.6721 | 4.97 |
| chr2L | 11106065 | 11107685 | l(2)gd1   | 263  | 30.6721 | 4.97 |
| chr2L | 11130627 | 11131588 | RfC38     | 330  | 31.6553 | 5.25 |
| chr2L | 11130627 | 11131588 | CG4751    | 239  | 31.6553 | 5.25 |
| chr2L | 11155413 | 11155959 | CG6287    | 45   | 58.935  | 7.72 |
| chr2L | 11277913 | 11278616 | CG33695   | 43   | 13.94   | 3.38 |
| chr2L | 11280130 | 11280933 | Ppt2      | 8    | 19.8396 | 4.24 |
| chr2L | 11280130 | 11280933 | CR44182   | 288  | 19.8396 | 4.24 |
| chr2L | 11317047 | 11317313 | CR44583   | 1778 | 11.6017 | 3.37 |
| chr2L | 11516265 | 11517419 | CG6509    | 192  | 30.3205 | 4.75 |
| chr2L | 11516265 | 11517419 | CG4970    | 501  | 30.3205 | 4.75 |
| chr2L | 11807381 | 11808303 | crol      | 932  | 25.041  | 4.55 |
| chr2L | 11808777 | 11809546 | crol      | 70   | 26.1705 | 3.92 |
| chr2L | 11813146 | 11813872 | CycY      | 381  | 16.8296 | 3.85 |
| chr2L | 11970639 | 11971371 | CR43314   | 128  | 18.4467 | 4.12 |
| chr2L | 11987433 | 11988628 | CG6686    | 270  | 16.1055 | 3.96 |
| chr2L | 11987433 | 11988628 | CG34163   | 500  | 16.1055 | 3.96 |
| chr2L | 12002974 | 12007926 | Rh5       | 622  | 48.1726 | 4.98 |
| chr2L | 12009998 | 12012720 | CR44588   | 1111 | 25.2747 | 4.09 |
| chr2L | 12025360 | 12025678 | CR44587   | 324  | 15.3164 | 4.09 |
| chr2L | 12038012 | 12038538 | Tom70     | 51   | 12.8577 | 3.42 |
| chr2L | 12044690 | 12047044 | CG6785    | 864  | 23.2622 | 4.07 |
| chr2L | 12044690 | 12047044 | CG6770    | 54   | 23.2622 | 4.07 |
| chr2L | 12044690 | 12047044 | CR44589   | 377  | 23.2622 | 4.07 |
| chr2L | 12048269 | 12048962 | Plzf      | 109  | 18.8102 | 4.38 |
| chr2L | 12055490 | 12056832 | Jhl-21    | 31   | 37.327  | 6.41 |
| chr2L | 12055490 | 12056832 | RpL7-like | 407  | 37.327  | 6.41 |
| chr2L | 12055490 | 12056832 | CG34164   | 429  | 37.327  | 6.41 |
| chr2L | 12055490 | 12056832 | RpL7-like | 429  | 37.327  | 6.41 |
| chr2L | 12093579 | 12094124 | Pex19     | 21   | 16.5551 | 4.26 |
| chr2L | 12095946 | 12096899 | CG6712    | 178  | 19.409  | 4.51 |
| chr2L | 12095946 | 12096899 | Mt2       | 191  | 19.409  | 4.51 |
| chr2L | 12103058 | 12104411 | Patsas    | 655  | 31.8157 | 5.16 |
| chr2L | 12103058 | 12104411 | Aats-thr  | 190  | 31.8157 | 5.16 |
| chr2L | 12108527 | 12109217 | Rab6      | 98   | 29.4241 | 5.10 |
| chr2L | 12421649 | 12422034 | vir-1     | 23   | 11.2123 | 3.08 |

|       |          |          |                |       |         |      |
|-------|----------|----------|----------------|-------|---------|------|
| chr2L | 12427308 | 12427775 | CG5446         | 23    | 16.7534 | 4.05 |
| chr2L | 12433501 | 12435929 | SC35           | 105   | 37.5165 | 5.29 |
| chr2L | 12433501 | 12435929 | Elf            | 518   | 37.5165 | 5.29 |
| chr2L | 12433501 | 12435929 | SC35           | 732   | 37.5165 | 5.29 |
| chr2L | 12433501 | 12435929 | Elf            | 958   | 37.5165 | 5.29 |
| chr2L | 12436316 | 12436822 | Elf            | 93    | 15.2975 | 3.84 |
| chr2L | 12529469 | 12529898 | bun            | 11194 | 12.1432 | 3.35 |
| chr2L | 12692090 | 12693163 | CG5525         | 330   | 33.4714 | 5.21 |
| chr2L | 12692090 | 12693163 | CG6153         | 388   | 33.4714 | 5.21 |
| chr2L | 12704089 | 12705150 | CG5776         | 257   | 14.9226 | 3.23 |
| chr2L | 12704089 | 12705150 | spict          | 16    | 14.9226 | 3.23 |
| chr2L | 12718864 | 12719349 | MRP            | 31    | 32.3973 | 4.98 |
| chr2L | 12721165 | 12722648 | Pih1D1         | 125   | 17.5402 | 3.63 |
| chr2L | 12721165 | 12722648 | MRP            | 554   | 17.5402 | 3.63 |
| chr2L | 12974112 | 12975574 | Vha68-2        | 62    | 20.0928 | 3.73 |
| chr2L | 13004465 | 13004955 | Tor            | 175   | 27.9529 | 4.73 |
| chr2L | 13018252 | 13019300 | CG9934         | 13    | 13.233  | 3.32 |
| chr2L | 13020567 | 13021509 | A16            | 16    | 12.7404 | 3.77 |
| chr2L | 13059813 | 13060465 | CG9932         | 43    | 22.9909 | 3.98 |
| chr2L | 13165408 | 13166671 | Sirt1          | 421   | 30.6156 | 4.57 |
| chr2L | 13165408 | 13166671 | DnaJ-H         | 88    | 30.6156 | 4.57 |
| chr2L | 13176212 | 13177743 | Sfmbt          | 413   | 29.9359 | 5.26 |
| chr2L | 13176212 | 13177743 | CG43925        | 373   | 29.9359 | 5.26 |
| chr2L | 13176212 | 13177743 | Sfmbt          | 10    | 29.9359 | 5.26 |
| chr2L | 13176212 | 13177743 | CG5439         | 354   | 29.9359 | 5.26 |
| chr2L | 13179161 | 13179668 | CG5287         | 218   | 20.4553 | 4.14 |
| chr2L | 13191594 | 13192601 | CG16974        | 235   | 9.6957  | 3.03 |
| chr2L | 13191594 | 13192601 | Edem2          | 14    | 9.6957  | 3.03 |
| chr2L | 13203708 | 13204711 | Pect           | 231   | 29.5482 | 4.78 |
| chr2L | 13215742 | 13216139 | snRNA:U2:34ABb | 118   | 38.6289 | 5.19 |
| chr2L | 13215742 | 13216139 | snRNA:U2:34ABc | 118   | 38.6289 | 5.19 |
| chr2L | 13219169 | 13220390 | CG9426         | 35    | 25.9709 | 4.55 |
| chr2L | 13219169 | 13220390 | CG5705         | 90    | 25.9709 | 4.55 |
| chr2L | 13285950 | 13287259 | Drep4          | 532   | 15.2967 | 3.79 |
| chr2L | 13285950 | 13287259 | Uvrag          | 218   | 15.2967 | 3.79 |
| chr2L | 13289931 | 13291445 | CG31729        | 6     | 32.0617 | 4.64 |
| chr2L | 13373106 | 13374672 | CG9305         | 147   | 46.134  | 6.34 |
| chr2L | 13373106 | 13374672 | CG6565         | 341   | 46.134  | 6.34 |
| chr2L | 13378198 | 13379335 | CG9302         | 374   | 17.3643 | 3.64 |
| chr2L | 13378198 | 13379335 | beta'COP       | 11    | 17.3643 | 3.64 |
| chr2L | 13394321 | 13395275 | RpL24          | 97    | 26.0908 | 5.05 |
| chr2L | 13512760 | 13513778 | CG33640        | 14494 | 20.6511 | 3.99 |
| chr2L | 13548604 | 13549632 | B4             | 86    | 34.1336 | 5.04 |
| chr2L | 13550082 | 13550836 | kuz            | 159   | 15.0394 | 3.12 |
| chr2L | 13665427 | 13666258 | CG18507        | 148   | 15.9181 | 3.39 |
| chr2L | 13779844 | 13781110 | CG9008         | 49    | 83.3352 | 9.96 |
| chr2L | 13779844 | 13781110 | p38b           | 572   | 83.3352 | 9.96 |
| chr2L | 13793429 | 13793983 | Sec71          | 165   | 34.2783 | 5.73 |
| chr2L | 13803105 | 13803864 | CAH1           | 20    | 13.0413 | 3.50 |
| chr2L | 13813710 | 13814441 | Sos            | 392   | 20.3428 | 4.23 |
| chr2L | 13820898 | 13821395 | b              | 33    | 9.59119 | 3.23 |
| chr2L | 13832672 | 13833842 | CG33649        | 77    | 14.8491 | 3.35 |
| chr2L | 13832672 | 13833842 | DNApol-gamma35 | 77    | 14.8491 | 3.35 |
| chr2L | 13832672 | 13833842 | RpII33         | 308   | 14.8491 | 3.35 |
| chr2L | 13903864 | 13904774 | Smg5           | 80    | 30.6156 | 4.57 |
| chr2L | 14110354 | 14110723 | CG31769        | 200   | 9.68089 | 3.37 |

|       |          |          |          |       |         |      |
|-------|----------|----------|----------|-------|---------|------|
| chr2L | 14233872 | 14234287 | Dyrk2    | 43    | 18.3864 | 3.86 |
| chr2L | 14348243 | 14348909 | mTTF     | 47    | 21.1978 | 4.57 |
| chr2L | 14354278 | 14355681 | I(2)34Fd | 111   | 39.3626 | 5.63 |
| chr2L | 14354278 | 14355681 | Rab14    | 52    | 39.3626 | 5.63 |
| chr2L | 14362011 | 14362928 | spel1    | 100   | 20.1429 | 4.61 |
| chr2L | 14614722 | 14615945 | Adhr     | 8     | 13.5752 | 3.48 |
| chr2L | 14614722 | 14615945 | Adh      | 8     | 13.5752 | 3.48 |
| chr2L | 14689039 | 14689402 | osp      | 92    | 19.6821 | 3.60 |
| chr2L | 15007839 | 15008380 | NC2beta  | 218   | 18.4788 | 3.97 |
| chr2L | 15009314 | 15010359 | I(2)35Bc | 393   | 12.2069 | 3.20 |
| chr2L | 15009314 | 15010359 | I(2)35Bd | 179   | 12.2069 | 3.20 |
| chr2L | 15037950 | 15038874 | CIAPIN1  | 173   | 15.9328 | 3.63 |
| chr2L | 15039341 | 15039834 | Su(H)    | 126   | 21.0887 | 4.06 |
| chr2L | 15057022 | 15057994 | ck       | 30    | 12.7728 | 3.03 |
| chr2L | 15059821 | 15061056 | TfllS    | 194   | 23.5836 | 4.68 |
| chr2L | 15271228 | 15272130 | Cul3     | 161   | 35.5264 | 4.86 |
| chr2L | 15498889 | 15499805 | lace     | 166   | 27.1785 | 4.50 |
| chr2L | 15747250 | 15748015 | CR44866  | 476   | 29.4241 | 4.82 |
| chr2L | 15750577 | 15751211 | ND-B17   | 199   | 39.1036 | 5.84 |
| chr2L | 15752213 | 15752824 | I(2)35Df | 236   | 16.4711 | 3.93 |
| chr2L | 15762385 | 15762831 | Gli      | 91    | 20.2994 | 4.16 |
| chr2L | 16049667 | 16050049 | beat-la  | 188   | 10.7856 | 3.56 |
| chr2L | 16257209 | 16258423 | PRL-1    | 157   | 15.0109 | 3.50 |
| chr2L | 16257209 | 16258423 | EndoGI   | 238   | 15.0109 | 3.50 |
| chr2L | 16272844 | 16273826 | CG4935   | 11543 | 10.6984 | 3.21 |
| chr2L | 16286602 | 16288900 | crp      | 112   | 53.6466 | 6.06 |
| chr2L | 16286602 | 16288900 | pkaap    | 671   | 53.6466 | 6.06 |
| chr2L | 16299144 | 16300517 | heix     | 396   | 26.4398 | 5.05 |
| chr2L | 16299144 | 16300517 | CG17328  | 480   | 26.4398 | 5.05 |
| chr2L | 16324685 | 16326291 | cact     | 52    | 22.2338 | 3.95 |
| chr2L | 16328571 | 16329262 | mRpL4    | 184   | 9.54246 | 3.07 |
| chr2L | 16350675 | 16353352 | CG42231  | 331   | 12.9588 | 3.03 |
| chr2L | 16350675 | 16353352 | chif     | 331   | 12.9588 | 3.03 |
| chr2L | 16350675 | 16353352 | CG4455   | 636   | 12.9588 | 3.03 |
| chr2L | 16356248 | 16356896 | CaBP1    | 53    | 20.8903 | 4.71 |
| chr2L | 16450849 | 16451333 | ldgf3    | 49    | 22.3256 | 4.28 |
| chr2L | 16485689 | 16486905 | dac      | 492   | 23.5522 | 4.16 |
| chr2L | 16521147 | 16521904 | CG5953   | 1467  | 11.7447 | 3.41 |
| chr2L | 16532596 | 16533703 | CG5953   | 12    | 21.6997 | 3.72 |
| chr2L | 16601640 | 16602120 | CG42389  | 28    | 36.3471 | 5.44 |
| chr2L | 16715639 | 16716242 | Cyt-c-d  | 72    | 15.9106 | 3.62 |
| chr2L | 16715639 | 16716242 | CG31808  | 163   | 15.9106 | 3.62 |
| chr2L | 16719602 | 16721257 | Cyt-c-p  | 26    | 17.2519 | 3.43 |
| chr2L | 16732568 | 16733098 | CG17904  | 130   | 13.0517 | 3.33 |
| chr2L | 16742706 | 16743928 | LSm7     | 459   | 24.5074 | 4.68 |
| chr2L | 16742706 | 16743928 | BuGZ     | 155   | 24.5074 | 4.68 |
| chr2L | 16791448 | 16791993 | CG17928  | 71    | 15.7576 | 3.64 |
| chr2L | 16816491 | 16816875 | mdy      | 26    | 29.3431 | 5.03 |
| chr2L | 16824827 | 16825298 | Cas      | 111   | 20.2104 | 3.51 |
| chr2L | 16826969 | 16827810 | CG31739  | 81    | 24.6971 | 4.90 |
| chr2L | 16881062 | 16881709 | CG31743  | 25    | 22.9612 | 4.39 |
| chr2L | 16887376 | 16889196 | CG6115   | 106   | 33.3852 | 4.74 |
| chr2L | 16887376 | 16889196 | tweek    | 629   | 33.3852 | 4.74 |
| chr2L | 16887376 | 16889196 | CR44392  | 646   | 33.3852 | 4.74 |
| chr2L | 17383666 | 17384235 | Lrch     | 63    | 16.6352 | 3.59 |
| chr2L | 17427397 | 17428409 | Dif      | 33    | 15.7273 | 3.47 |

|       |          |          |          |      |         |      |
|-------|----------|----------|----------|------|---------|------|
| chr2L | 17477259 | 17477997 | Aac11    | 63   | 13.933  | 3.46 |
| chr2L | 17963196 | 17963638 | CG5674   | 27   | 19.6406 | 3.86 |
| chr2L | 18137559 | 18138169 | kel      | 165  | 11.2866 | 3.21 |
| chr2L | 18151215 | 18152731 | Socs36E  | 51   | 25.0413 | 4.26 |
| chr2L | 18442511 | 18443430 | RpS26    | 62   | 27.4214 | 4.32 |
| chr2L | 18448479 | 18449008 | ncm      | 241  | 31.3024 | 5.45 |
| chr2L | 18454223 | 18454778 | bsf      | 84   | 17.1899 | 3.65 |
| chr2L | 18454223 | 18454778 | Ntf-2r   | 145  | 17.1899 | 3.65 |
| chr2L | 18455560 | 18456456 | let-7-C  | 21   | 17.9766 | 3.79 |
| chr2L | 18483872 | 18484615 | CG10283  | 32   | 53.4167 | 6.48 |
| chr2L | 18572077 | 18572397 | Pde11    | 50   | 13.4499 | 3.25 |
| chr2L | 18590688 | 18591546 | CG15160  | 38   | 28.0496 | 5.38 |
| chr2L | 18604414 | 18605230 | CG10413  | 135  | 28.7495 | 4.76 |
| chr2L | 18611875 | 18612240 | Atac2    | 195  | 16.6352 | 3.59 |
| chr2L | 18677054 | 18677668 | CG31751  | 196  | 22.9612 | 4.39 |
| chr2L | 18698598 | 18699477 | CG10341  | 121  | 45.0318 | 6.51 |
| chr2L | 18702698 | 18704053 | CG10376  | 173  | 13.933  | 3.46 |
| chr2L | 18702698 | 18704053 | CG10343  | 540  | 13.933  | 3.46 |
| chr2L | 18705395 | 18705951 | Jwa      | 117  | 9.17445 | 3.12 |
| chr2L | 18707759 | 18709132 | Faf2     | 186  | 31.9271 | 4.66 |
| chr2L | 18707759 | 18709132 | Grip71   | 432  | 31.9271 | 4.66 |
| chr2L | 18732417 | 18733259 | CR44768  | 449  | 14.3258 | 3.63 |
| chr2L | 18732417 | 18733259 | CG10348  | 388  | 14.3258 | 3.63 |
| chr2L | 18808233 | 18809967 | CG42502  | 1198 | 28.1561 | 5.56 |
| chr2L | 18808233 | 18809967 | CG10570  | 1198 | 28.1561 | 5.56 |
| chr2L | 18808233 | 18809967 | CG42502  | 1198 | 28.1561 | 5.56 |
| chr2L | 18810480 | 18811330 | CG42502  | 26   | 16.5868 | 4.20 |
| chr2L | 18810480 | 18811330 | CG10570  | 26   | 16.5868 | 4.20 |
| chr2L | 18810480 | 18811330 | CG42502  | 26   | 16.5868 | 4.20 |
| chr2L | 18810480 | 18811330 | CG10570  | 240  | 16.5868 | 4.20 |
| chr2L | 18838698 | 18839854 | CG10600  | 270  | 38.7204 | 5.97 |
| chr2L | 18858766 | 18859392 | CG10602  | 196  | 28.5004 | 4.82 |
| chr2L | 18858766 | 18859392 | mRpL13   | 196  | 28.5004 | 4.82 |
| chr2L | 18881084 | 18881797 | tup      | 223  | 42.8757 | 6.42 |
| chr2L | 18968208 | 18969356 | Nak      | 144  | 17.532  | 3.41 |
| chr2L | 18968208 | 18969356 | Tango6   | 450  | 17.532  | 3.41 |
| chr2L | 18986993 | 18987947 | Swip-1   | 51   | 25.041  | 4.55 |
| chr2L | 18986993 | 18987947 | CG15168  | 477  | 25.041  | 4.55 |
| chr2L | 19008795 | 19009473 | RpL30    | 116  | 43.4925 | 5.28 |
| chr2L | 19034366 | 19035301 | mib2     | 422  | 25.5629 | 4.49 |
| chr2L | 19034366 | 19035301 | CG31800  | 289  | 25.5629 | 4.49 |
| chr2L | 19034366 | 19035301 | mib2     | 225  | 25.5629 | 4.49 |
| chr2L | 19051830 | 19052411 | Rpn3     | 229  | 21.4678 | 4.50 |
| chr2L | 19054046 | 19055023 | CG10492  | 406  | 57.6078 | 7.19 |
| chr2L | 19131356 | 19132037 | Aats-asn | 199  | 19.218  | 4.17 |
| chr2L | 19132387 | 19134497 | l(2)37Cg | 439  | 15.1713 | 3.49 |
| chr2L | 19132387 | 19134497 | brat     | 107  | 15.1713 | 3.49 |
| chr2L | 19158119 | 19158986 | brat     | 66   | 18.1434 | 3.29 |
| chr2L | 19190221 | 19190674 | drl      | 73   | 19.218  | 4.17 |
| chr2L | 19362665 | 19363231 | dnt      | 249  | 13.7537 | 3.47 |
| chr2L | 19398788 | 19399243 | CG17544  | 538  | 50.1838 | 6.79 |
| chr2L | 19444096 | 19445239 | Hs2st    | 137  | 17.8796 | 3.53 |
| chr2L | 19444096 | 19445239 | RanGAP   | 160  | 17.8796 | 3.53 |
| chr2L | 19492382 | 19493940 | CG10189  | 537  | 11.4702 | 3.02 |
| chr2L | 19492382 | 19493940 | swm      | 250  | 11.4702 | 3.02 |
| chr2L | 19492382 | 19493940 | CG10189  | 247  | 11.4702 | 3.02 |

|       |          |          |            |      |         |      |
|-------|----------|----------|------------|------|---------|------|
| chr2L | 19492382 | 19493940 | swm        | 67   | 11.4702 | 3.02 |
| chr2L | 19508148 | 19509095 | CG10188    | 248  | 22.4738 | 4.31 |
| chr2L | 19529817 | 19530339 | CG10165    | 215  | 18.8647 | 4.53 |
| chr2L | 19549369 | 19549971 | Tep4       | 57   | 17.6365 | 3.81 |
| chr2L | 19571790 | 19572747 | spi        | 77   | 46.1145 | 5.58 |
| chr2L | 19575156 | 19577393 | spi        | 175  | 16.2832 | 3.61 |
| chr2L | 19582013 | 19582558 | Hakai      | 181  | 35.8458 | 4.99 |
| chr2L | 19583240 | 19584811 | CG10262    | 103  | 13.6415 | 3.54 |
| chr2L | 19583240 | 19584811 | CG10366    | 347  | 13.6415 | 3.54 |
| chr2L | 19586570 | 19587675 | Lar        | 152  | 13.4393 | 3.08 |
| chr2L | 19756063 | 19757010 | CG10631    | 59   | 14.7396 | 3.08 |
| chr2L | 19791477 | 19792466 | CdGAPr     | 58   | 23.9142 | 4.00 |
| chr2L | 19791477 | 19792466 | CG10466    | 279  | 23.9142 | 4.00 |
| chr2L | 19935107 | 19935745 | sick       | 94   | 13.9265 | 3.60 |
| chr2L | 19958727 | 19959528 | COX4       | 114  | 23.9828 | 4.89 |
| chr2L | 20066155 | 20067085 | bwa        | 22   | 28.4819 | 4.61 |
| chr2L | 20074900 | 20076049 | pr         | 243  | 13.8675 | 3.18 |
| chr2L | 20074900 | 20076049 | neb        | 541  | 13.8675 | 3.18 |
| chr2L | 20084216 | 20085719 | fok        | 31   | 19.3273 | 3.61 |
| chr2L | 20090841 | 20091939 | CG10747    | 362  | 12.2143 | 3.02 |
| chr2L | 20090841 | 20091939 | CG10721    | 99   | 12.2143 | 3.02 |
| chr2L | 20349080 | 20350861 | La         | 233  | 39.3626 | 6.65 |
| chr2L | 20349080 | 20350861 | RtGEF      | 654  | 39.3626 | 6.65 |
| chr2L | 20416378 | 20417782 | CG10949    | 305  | 48.7397 | 6.05 |
| chr2L | 20416378 | 20417782 | Arpc2      | 134  | 48.7397 | 6.05 |
| chr2L | 20655594 | 20656817 | bru        | 236  | 28.1646 | 5.26 |
| chr2L | 20655594 | 20656817 | CG2614     | 483  | 28.1646 | 5.26 |
| chr2L | 20720092 | 20720639 | CR45306    | 1666 | 19.565  | 3.98 |
| chr2L | 20757274 | 20758937 | CG9323     | 218  | 23.1868 | 4.55 |
| chr2L | 20757274 | 20758937 | dia        | 482  | 23.1868 | 4.55 |
| chr2L | 20770343 | 20770725 | cad        | 134  | 12.1669 | 3.27 |
| chr2L | 20787496 | 20788169 | Pomp       | 162  | 24.577  | 3.95 |
| chr2L | 20793596 | 20794262 | vari       | 29   | 12.0756 | 3.13 |
| chr2L | 20823723 | 20824114 | CG9331     | 368  | 15.9094 | 3.81 |
| chr2L | 20917184 | 20917621 | sky        | 13   | 12.7437 | 3.54 |
| chr2L | 21051206 | 21052206 | CG42238    | 33   | 24.0111 | 4.23 |
| chr2L | 21143149 | 21143762 | CG9253     | 115  | 38.9204 | 6.08 |
| chr2L | 21162605 | 21163172 | Nbr        | 77   | 26.1078 | 4.53 |
| chr2L | 21163520 | 21164181 | CG9246     | 90   | 13.7586 | 3.38 |
| chr2L | 21168344 | 21169485 | CG43345    | 344  | 19.5999 | 3.94 |
| chr2L | 21168344 | 21169485 | CG43346    | 344  | 19.5999 | 3.94 |
| chr2L | 21168344 | 21169485 | Acon       | 124  | 19.5999 | 3.94 |
| chr2L | 21168344 | 21169485 | CG43346    | 112  | 19.5999 | 3.94 |
| chr2L | 21168344 | 21169485 | CG43345    | 112  | 19.5999 | 3.94 |
| chr2L | 21168344 | 21169485 | Acon       | 43   | 19.5999 | 3.94 |
| chr2L | 21178504 | 21179744 | bur        | 128  | 19.7049 | 3.67 |
| chr2L | 21219636 | 21220686 | Atg18b     | 110  | 11.0265 | 3.08 |
| chr2L | 21237087 | 21238276 | Hr39       | 128  | 23.3233 | 3.96 |
| chr2L | 21261008 | 21261537 | I(2)k14505 | 244  | 11.124  | 3.53 |
| chr2L | 21308788 | 21310267 | Mondo      | 160  | 48.5632 | 6.97 |
| chr2L | 21310751 | 21311417 | crc        | 88   | 29.4241 | 4.82 |
| chr2L | 21629167 | 21630105 | Df31       | 39   | 48.8395 | 5.95 |
| chr2L | 21681275 | 21682251 | EF2        | 4    | 16.9985 | 3.83 |
| chr2L | 21757017 | 21757586 | step       | 119  | 12.7602 | 3.19 |
| chr2L | 21828397 | 21829108 | tsh        | 112  | 14.2928 | 3.44 |
| chr2L | 22121758 | 22122298 | CG3651     | 196  | 34.3815 | 5.18 |

|       |          |          |            |       |         |      |
|-------|----------|----------|------------|-------|---------|------|
| chr2L | 22247224 | 22247815 | RpL21      | 253   | 18.2193 | 3.88 |
| chr2L | 22535850 | 22536462 | RpL5       | 440   | 8.86652 | 3.04 |
| chr2R | 870235   | 870529   | CG40439    | 15553 | 31.9031 | 3.53 |
| chr2R | 5608573  | 5609326  | CG17508    | 83    | 18.6029 | 4.10 |
| chr2R | 5754501  | 5755033  | l(2)09851  | 188   | 22.3955 | 4.51 |
| chr2R | 5760809  | 5761225  | Gp210      | 127   | 21.4885 | 4.77 |
| chr2R | 6017550  | 6018317  | Pngl       | 122   | 18.0567 | 4.41 |
| chr2R | 6035259  | 6036704  | SCAP       | 23    | 18.9749 | 3.83 |
| chr2R | 6075669  | 6077354  | CG7845     | 77    | 28.222  | 5.27 |
| chr2R | 6075669  | 6077354  | CG7849     | 619   | 28.222  | 5.27 |
| chr2R | 6084864  | 6085499  | Ars2       | 220   | 11.118  | 3.06 |
| chr2R | 6132915  | 6133903  | EcR        | 1265  | 22.3765 | 3.62 |
| chr2R | 6173564  | 6173989  | Cyp6w1     | 38    | 12.3786 | 3.67 |
| chr2R | 6213715  | 6214821  | l(2)k14710 | 520   | 15.5781 | 3.33 |
| chr2R | 6213715  | 6214821  | bin3       | 75    | 15.5781 | 3.33 |
| chr2R | 6501539  | 6502362  | CR46075    | 246   | 20.4891 | 3.79 |
| chr2R | 6501539  | 6502362  | jing       | 13    | 20.4891 | 3.79 |
| chr2R | 6631360  | 6633288  | Vha16-1    | 185   | 48.7877 | 6.00 |
| chr2R | 6635692  | 6637111  | Trap1      | 478   | 41.9091 | 6.11 |
| chr2R | 6635692  | 6637111  | Bap170     | 229   | 41.9091 | 6.11 |
| chr2R | 6655851  | 6656463  | geminin    | 67    | 10.8054 | 3.50 |
| chr2R | 6661228  | 6663906  | Dpit47     | 964   | 29.6618 | 4.80 |
| chr2R | 6661228  | 6663906  | Adf1       | 813   | 29.6618 | 4.80 |
| chr2R | 6672820  | 6673794  | Hsepi      | 244   | 13.4155 | 3.32 |
| chr2R | 6672820  | 6673794  | PGAP3      | 13    | 13.4155 | 3.32 |
| chr2R | 6741721  | 6742738  | phtf       | 293   | 20.1634 | 4.04 |
| chr2R | 6749096  | 6749729  | Eb1        | 107   | 16.6246 | 3.51 |
| chr2R | 6807581  | 6808187  | SdhB       | 213   | 17.6909 | 3.92 |
| chr2R | 6810906  | 6811952  | koi        | 44    | 23.1018 | 4.08 |
| chr2R | 6871525  | 6873292  | coro       | 99    | 43.0133 | 5.46 |
| chr2R | 6871525  | 6873292  | CR44169    | 529   | 43.0133 | 5.46 |
| chr2R | 6878343  | 6878997  | Spn42Da    | 43    | 17.5225 | 3.55 |
| chr2R | 6985255  | 6985722  | CG30156    | 128   | 15.3956 | 3.34 |
| chr2R | 6985255  | 6985722  | vimar      | 128   | 15.3956 | 3.34 |
| chr2R | 6986021  | 6986475  | CG17002    | 228   | 13.8233 | 3.40 |
| chr2R | 6992505  | 6993267  | Tsp42Ea    | 67    | 19.2393 | 4.02 |
| chr2R | 6992505  | 6993267  | CG30159    | 62    | 19.2393 | 4.02 |
| chr2R | 6992505  | 6993267  | Tsp42Ea    | 62    | 19.2393 | 4.02 |
| chr2R | 6992505  | 6993267  | CG30159    | 62    | 19.2393 | 4.02 |
| chr2R | 6992505  | 6993267  | Tsp42Ea    | 62    | 19.2393 | 4.02 |
| chr2R | 6992505  | 6993267  | CG30159    | 177   | 19.2393 | 4.02 |
| chr2R | 7012095  | 7013246  | Tsp42Ee    | 81    | 17.3508 | 3.41 |
| chr2R | 7024850  | 7025516  | Tsp42Ef    | 20    | 32.3734 | 5.32 |
| chr2R | 7044959  | 7046122  | Tsp42Ei    | 135   | 12.1669 | 3.27 |
| chr2R | 7150682  | 7151027  | pk         | 59    | 12.0224 | 3.53 |
| chr2R | 7157860  | 7158333  | nec        | 92    | 13.0517 | 3.33 |
| chr2R | 7277666  | 7278319  | Br140      | 57    | 31.425  | 4.93 |
| chr2R | 7352212  | 7352800  | CR44071    | 9078  | 29.8606 | 5.00 |
| chr2R | 7381516  | 7382094  | Dscam1     | 58    | 24.9643 | 4.39 |
| chr2R | 7386648  | 7388062  | cos        | 350   | 14.9226 | 3.23 |
| chr2R | 7386648  | 7388062  | Dhx15      | 142   | 14.9226 | 3.23 |
| chr2R | 7395584  | 7396051  | Glo1       | 81    | 22.6738 | 4.45 |
| chr2R | 7406677  | 7407951  | mir-4977   | 385   | 17.678  | 4.08 |
| chr2R | 7406677  | 7407951  | Eaf        | 597   | 17.678  | 4.08 |
| chr2R | 7419170  | 7419576  | so         | 36    | 12.9822 | 3.71 |
| chr2R | 7458434  | 7459045  | Inos       | 47    | 26.2299 | 4.71 |

|       |         |         |           |      |         |      |
|-------|---------|---------|-----------|------|---------|------|
| chr2R | 7465971 | 7466953 | p47       | 243  | 21.7465 | 3.80 |
| chr2R | 7473721 | 7474756 | Aldh-III  | 67   | 20.3191 | 3.81 |
| chr2R | 7491964 | 7493472 | Coop      | 55   | 29.752  | 4.98 |
| chr2R | 7491964 | 7493472 | CR43723   | 106  | 29.752  | 4.98 |
| chr2R | 7491964 | 7493472 | Coop      | 332  | 29.752  | 4.98 |
| chr2R | 7495898 | 7496417 | CG1620    | 196  | 14.5117 | 3.29 |
| chr2R | 7528977 | 7529840 | Drat      | 13   | 16.5842 | 3.80 |
| chr2R | 7533239 | 7534433 | CR44209   | 105  | 29.792  | 4.63 |
| chr2R | 7533239 | 7534433 | Cyt-b5    | 97   | 29.792  | 4.63 |
| chr2R | 7539080 | 7540003 | CG1598    | 112  | 22.227  | 4.48 |
| chr2R | 7565044 | 7567467 | CG30499   | 1104 | 52.3598 | 6.52 |
| chr2R | 7565044 | 7567467 | boca      | 117  | 52.3598 | 6.52 |
| chr2R | 7565044 | 7567467 | Vps13     | 47   | 52.3598 | 6.52 |
| chr2R | 7632422 | 7633346 | CG43341   | 89   | 12.2143 | 3.02 |
| chr2R | 7636777 | 7637158 | CG43340   | 39   | 14.6489 | 3.81 |
| chr2R | 7668310 | 7669021 | DCTN4-p62 | 196  | 15.1939 | 3.41 |
| chr2R | 7673966 | 7674923 | mRpL52    | 214  | 14.6359 | 3.56 |
| chr2R | 7673966 | 7674923 | CG12107   | 263  | 14.6359 | 3.56 |
| chr2R | 7699175 | 7699955 | CG30493   | 54   | 14.455  | 3.73 |
| chr2R | 7699175 | 7699955 | CG30496   | 193  | 14.455  | 3.73 |
| chr2R | 7735010 | 7735743 | CG18812   | 303  | 20.6778 | 4.47 |
| chr2R | 7793575 | 7793907 | mus205    | 145  | 14.85   | 3.60 |
| chr2R | 7805201 | 7807291 | Nop17l    | 95   | 26.2481 | 4.50 |
| chr2R | 7805201 | 7807291 | sax       | 822  | 26.2481 | 4.50 |
| chr2R | 7822973 | 7823634 | cathD     | 187  | 35.0342 | 5.80 |
| chr2R | 7938657 | 7939544 | CG8728    | 51   | 19.8396 | 4.24 |
| chr2R | 7955055 | 7956121 | CG14764   | 103  | 23.2132 | 4.80 |
| chr2R | 7962430 | 7963155 | nito      | 161  | 23.7056 | 4.27 |
| chr2R | 7971114 | 7972077 | CG8726    | 72   | 18.4659 | 4.30 |
| chr2R | 7972485 | 7972977 | CSN4      | 58   | 14.9618 | 3.82 |
| chr2R | 7983307 | 7984484 | ACC       | 54   | 23.157  | 3.97 |
| chr2R | 8001633 | 8002662 | CG11191   | 95   | 14.4324 | 4.07 |
| chr2R | 8018728 | 8019285 | CR45267   | 198  | 19.0787 | 4.04 |
| chr2R | 8030627 | 8031683 | Optix     | 331  | 14.6897 | 3.88 |
| chr2R | 8067881 | 8069468 | lig       | 68   | 25.2747 | 4.09 |
| chr2R | 8081811 | 8083557 | slv       | 219  | 21.0719 | 4.21 |
| chr2R | 8081811 | 8083557 | sut1      | 974  | 21.0719 | 4.21 |
| chr2R | 8081811 | 8083557 | slv       | 1074 | 21.0719 | 4.21 |
| chr2R | 8098713 | 8099153 | CG11210   | 318  | 11.157  | 3.03 |
| chr2R | 8122471 | 8123473 | Asap      | 177  | 18.0528 | 3.89 |
| chr2R | 8122471 | 8123473 | Nup50     | 211  | 18.0528 | 3.89 |
| chr2R | 8127502 | 8128086 | Socs44A   | 101  | 11.9082 | 3.40 |
| chr2R | 8131271 | 8132613 | Pbp49     | 783  | 34.1874 | 5.45 |
| chr2R | 8131271 | 8132613 | CG42516   | 783  | 34.1874 | 5.45 |
| chr2R | 8131271 | 8132613 | Pbp49     | 783  | 34.1874 | 5.45 |
| chr2R | 8131271 | 8132613 | Pabp2     | 676  | 34.1874 | 5.45 |
| chr2R | 8145720 | 8146460 | Lpin      | 50   | 24.478  | 4.17 |
| chr2R | 8163067 | 8163658 | RagC-D    | 127  | 17.4043 | 3.73 |
| chr2R | 8163067 | 8163658 | Rs1       | 190  | 17.4043 | 3.73 |
| chr2R | 8570521 | 8570791 | Cyp6a13   | 130  | 11.4281 | 3.49 |
| chr2R | 8599307 | 8600055 | CG8735    | 72   | 16.2837 | 3.84 |
| chr2R | 8600329 | 8600682 | rgr       | 87   | 20.0567 | 3.65 |
| chr2R | 8614555 | 8615311 | Cirl      | 192  | 15.03   | 3.35 |
| chr2R | 8696309 | 8697201 | CG8738    | 50   | 12.5105 | 3.54 |
| chr2R | 8723214 | 8725011 | CG14767   | 527  | 31.5738 | 5.50 |
| chr2R | 8723214 | 8725011 | gcl       | 109  | 31.5738 | 5.50 |

|       |         |         |                    |      |         |      |
|-------|---------|---------|--------------------|------|---------|------|
| chr2R | 8723214 | 8725011 | snoRNA:gcl-a       | 538  | 31.5738 | 5.50 |
| chr2R | 8732820 | 8734382 | stmA               | 113  | 21.0887 | 4.06 |
| chr2R | 8735340 | 8736314 | CG8740             | 83   | 23.1448 | 4.72 |
| chr2R | 8899898 | 8901942 | ana2               | 1143 | 24.1873 | 4.09 |
| chr2R | 8899898 | 8901942 | CG13751            | 1114 | 24.1873 | 4.09 |
| chr2R | 8899898 | 8901942 | MrgBP              | 21   | 24.1873 | 4.09 |
| chr2R | 8899898 | 8901942 | Ggamma1            | 49   | 24.1873 | 4.09 |
| chr2R | 8906495 | 8907076 | CG8258             | 171  | 14.653  | 3.51 |
| chr2R | 8907404 | 8907915 | CG30349            | 127  | 17.1899 | 3.65 |
| chr2R | 8914440 | 8915182 | lin                | 293  | 38.5999 | 6.50 |
| chr2R | 8922402 | 8923141 | Spt                | 137  | 14.24   | 3.72 |
| chr2R | 8922402 | 8923141 | CG8243             | 166  | 14.24   | 3.72 |
| chr2R | 8927732 | 8928737 | CG8235             | 29   | 25.3185 | 4.50 |
| chr2R | 8927732 | 8928737 | PAN2               | 92   | 25.3185 | 4.50 |
| chr2R | 8946897 | 8947511 | CG8230             | 57   | 23.4625 | 4.48 |
| chr2R | 8950323 | 8952795 | CG8229             | 111  | 20.4414 | 3.71 |
| chr2R | 8950323 | 8952795 | CG33199            | 111  | 20.4414 | 3.71 |
| chr2R | 8950323 | 8952795 | CG8229             | 111  | 20.4414 | 3.71 |
| chr2R | 8950323 | 8952795 | CG33199            | 111  | 20.4414 | 3.71 |
| chr2R | 8950323 | 8952795 | Tom7               | 619  | 20.4414 | 3.71 |
| chr2R | 8950323 | 8952795 | babo               | 1363 | 20.4414 | 3.71 |
| chr2R | 9087818 | 9088392 | Dbp45A             | 209  | 26.3075 | 4.96 |
| chr2R | 9092605 | 9093281 | CG8080             | 9    | 12.8698 | 3.33 |
| chr2R | 9095076 | 9095857 | Uhg4               | 106  | 27.7658 | 3.90 |
| chr2R | 9095076 | 9095857 | snoRNA:Psi28S-2949 | 7    | 27.7658 | 3.90 |
| chr2R | 9095076 | 9095857 | snoRNA:Or-aca5     | 306  | 27.7658 | 3.90 |
| chr2R | 9110693 | 9111281 | tsu                | 173  | 53.0031 | 7.71 |
| chr2R | 9113586 | 9114875 | Mys45A             | 90   | 22.3397 | 4.75 |
| chr2R | 9113586 | 9114875 | Phax               | 412  | 22.3397 | 4.75 |
| chr2R | 9115721 | 9117493 | Su(var)2-10        | 239  | 23.0792 | 4.36 |
| chr2R | 9131111 | 9131942 | CG18659            | 190  | 20.5859 | 3.63 |
| chr2R | 9132335 | 9133206 | Hydr1              | 16   | 15.2023 | 3.58 |
| chr2R | 9136682 | 9138101 | alc                | 91   | 55.8552 | 6.41 |
| chr2R | 9148540 | 9149155 | CG30345            | 33   | 23.0834 | 4.22 |
| chr2R | 9176839 | 9177469 | Rme-8              | 169  | 27.2964 | 5.16 |
| chr2R | 9185528 | 9186579 | Rab32              | 41   | 29.6845 | 4.56 |
| chr2R | 9191246 | 9192191 | CG8026             | 79   | 54.4604 | 6.06 |
| chr2R | 9191246 | 9192191 | CG45085            | 79   | 54.4604 | 6.06 |
| chr2R | 9191246 | 9192191 | CG8026             | 79   | 54.4604 | 6.06 |
| chr2R | 9206671 | 9208141 | CG8027             | 502  | 20.4089 | 3.64 |
| chr2R | 9206671 | 9208141 | VhaAC45            | 66   | 20.4089 | 3.64 |
| chr2R | 9239907 | 9240292 | Cyp4p1             | 20   | 11.3973 | 3.08 |
| chr2R | 9286271 | 9287116 | CG2063             | 256  | 14.7199 | 3.72 |
| chr2R | 9286271 | 9287116 | CG1968             | 64   | 14.7199 | 3.72 |
| chr2R | 9308141 | 9308892 | Myd88              | 99   | 17.3503 | 3.63 |
| chr2R | 9398186 | 9399434 | Non1               | 214  | 25.8329 | 4.58 |
| chr2R | 9398186 | 9399434 | l(2)k10201         | 559  | 25.8329 | 4.58 |
| chr2R | 9408979 | 9409789 | wun                | 67   | 38.6211 | 5.35 |
| chr2R | 9423961 | 9424700 | prel               | 38   | 23.1698 | 5.08 |
| chr2R | 9426322 | 9427164 | Pdk                | 292  | 16.6246 | 3.51 |
| chr2R | 9440614 | 9441734 | ced-6              | 81   | 20.5596 | 3.89 |
| chr2R | 9445824 | 9446739 | Camta              | 147  | 17.1625 | 3.60 |
| chr2R | 9552693 | 9554923 | CR43651            | 59   | 19.5315 | 3.68 |
| chr2R | 9552693 | 9554923 | mir-14             | 859  | 19.5315 | 3.68 |
| chr2R | 9577292 | 9579140 | CG1814             | 200  | 32.0708 | 5.15 |
| chr2R | 9577292 | 9579140 | Not1               | 384  | 32.0708 | 5.15 |



|       |          |          |            |      |         |      |
|-------|----------|----------|------------|------|---------|------|
| chr2R | 9577292  | 9579140  | CR46257    | 1278 | 32.0708 | 5.15 |
| chr2R | 9577292  | 9579140  | Not1       | 1381 | 32.0708 | 5.15 |
| chr2R | 9579424  | 9580185  | CG1814     | 288  | 37.592  | 5.71 |
| chr2R | 9584497  | 9585265  | CG1868     | 153  | 13.1096 | 3.57 |
| chr2R | 9584497  | 9585265  | Updo       | 56   | 13.1096 | 3.57 |
| chr2R | 9586163  | 9586759  | CG12929    | 71   | 13.3314 | 3.67 |
| chr2R | 9587090  | 9587618  | RpL31      | 7    | 15.676  | 3.87 |
| chr2R | 9593919  | 9594545  | CG1902     | 190  | 27.9181 | 5.01 |
| chr2R | 9593919  | 9594545  | CG30338    | 190  | 27.9181 | 5.01 |
| chr2R | 9606005  | 9606587  | GstT1      | 322  | 10.4185 | 3.24 |
| chr2R | 9691913  | 9693490  | Uba1       | 643  | 40.1528 | 4.67 |
| chr2R | 9712121  | 9712861  | dap        | 132  | 16.989  | 3.57 |
| chr2R | 9835915  | 9837244  | hebe       | 22   | 19.7164 | 4.39 |
| chr2R | 9835915  | 9837244  | CG1663     | 364  | 19.7164 | 4.39 |
| chr2R | 9839418  | 9839862  | Lsm11      | 15   | 11.0265 | 3.08 |
| chr2R | 9839418  | 9839862  | CG1665     | 260  | 11.0265 | 3.08 |
| chr2R | 9891195  | 9891789  | CG1513     | 262  | 13.0467 | 3.28 |
| chr2R | 9957969  | 9959036  | Mef2       | 184  | 27.793  | 4.65 |
| chr2R | 9959409  | 9960945  | Pal1       | 517  | 13.4499 | 3.25 |
| chr2R | 9959409  | 9960945  | CG15863    | 333  | 13.4499 | 3.25 |
| chr2R | 9959409  | 9960945  | Pal1       | 12   | 13.4499 | 3.25 |
| chr2R | 9968973  | 9969740  | Adam       | 213  | 28.0815 | 4.70 |
| chr2R | 9988948  | 9989628  | TER94      | 42   | 18.4231 | 3.44 |
| chr2R | 9988948  | 9989628  | CR45324    | 85   | 18.4231 | 3.44 |
| chr2R | 9988948  | 9989628  | TER94      | 115  | 18.4231 | 3.44 |
| chr2R | 10025211 | 10027478 | Pka-R2     | 127  | 31.547  | 4.57 |
| chr2R | 10025211 | 10027478 | CR44294    | 843  | 31.547  | 4.57 |
| chr2R | 10025211 | 10027478 | CG12128    | 923  | 31.547  | 4.57 |
| chr2R | 10032346 | 10033031 | CG1407     | 82   | 17.4043 | 3.73 |
| chr2R | 10047994 | 10048807 | COX7C      | 226  | 30.3476 | 4.81 |
| chr2R | 10047994 | 10048807 | oys        | 41   | 30.3476 | 4.81 |
| chr2R | 10049412 | 10050151 | COX7C      | 181  | 22.4738 | 4.31 |
| chr2R | 10051608 | 10052845 | sel        | 441  | 21.8115 | 4.57 |
| chr2R | 10051608 | 10052845 | magu       | 68   | 21.8115 | 4.57 |
| chr2R | 10096790 | 10098009 | Jra        | 164  | 26.3346 | 4.20 |
| chr2R | 10098869 | 10102314 | RpLP0-like | 327  | 40.8609 | 5.31 |
| chr2R | 10098869 | 10102314 | 14-3-3zeta | 241  | 40.8609 | 5.31 |
| chr2R | 10110388 | 10111769 | Pfk        | 141  | 38.6211 | 5.57 |
| chr2R | 10123831 | 10125436 | gem        | 50   | 30.7863 | 4.99 |
| chr2R | 10142073 | 10142780 | CR43467    | 308  | 13.3967 | 3.49 |
| chr2R | 10142073 | 10142780 | CG18011    | 45   | 13.3967 | 3.49 |
| chr2R | 10157999 | 10158818 | mlt        | 92   | 33.3728 | 5.56 |
| chr2R | 10159478 | 10160372 | mlt        | 905  | 24.9184 | 4.43 |
| chr2R | 10251760 | 10252517 | Syb        | 106  | 27.6043 | 5.15 |
| chr2R | 10309337 | 10310819 | Jhl-1      | 416  | 20.3588 | 3.98 |
| chr2R | 10309337 | 10310819 | CG12909    | 98   | 20.3588 | 3.98 |
| chr2R | 10427885 | 10428681 | CG12896    | 498  | 14.3584 | 3.46 |
| chr2R | 10474767 | 10475761 | whd        | 74   | 49.5565 | 6.05 |
| chr2R | 10534635 | 10535296 | lola       | 56   | 22.9272 | 4.10 |
| chr2R | 10541452 | 10542555 | CR45135    | 47   | 15.4794 | 3.68 |
| chr2R | 10541452 | 10542555 | lola       | 29   | 15.4794 | 3.68 |
| chr2R | 10543112 | 10543587 | lola       | 79   | 14.4914 | 3.89 |
| chr2R | 10617459 | 10618737 | CG11883    | 41   | 29.5482 | 4.78 |
| chr2R | 10644980 | 10646144 | Git        | 231  | 13.0829 | 3.25 |
| chr2R | 10644980 | 10646144 | Elp2       | 76   | 13.0829 | 3.25 |
| chr2R | 10808276 | 10809096 | wde        | 33   | 17.0617 | 3.75 |

|       |          |          |                   |      |         |      |
|-------|----------|----------|-------------------|------|---------|------|
| chr2R | 10809437 | 10811286 | CG12935           | 1051 | 24.3368 | 4.59 |
| chr2R | 10809437 | 10811286 | CG7637            | 207  | 24.3368 | 4.59 |
| chr2R | 10809437 | 10811286 | mms4              | 348  | 24.3368 | 4.59 |
| chr2R | 10822585 | 10824003 | CG12343           | 134  | 16.4459 | 3.52 |
| chr2R | 10822585 | 10824003 | CG12325           | 166  | 16.4459 | 3.52 |
| chr2R | 10838378 | 10838906 | CG7686            | 27   | 20.2723 | 4.57 |
| chr2R | 10873963 | 10875092 | CG30015           | 74   | 43.0761 | 5.97 |
| chr2R | 10875787 | 10876481 | nclb              | 278  | 17.8858 | 3.91 |
| chr2R | 10879116 | 10880262 | Taf5              | 215  | 17.7005 | 3.47 |
| chr2R | 10879116 | 10880262 | Pex6              | 515  | 17.7005 | 3.47 |
| chr2R | 10898543 | 10899221 | Rpb5              | 289  | 15.4097 | 3.66 |
| chr2R | 11105673 | 11106993 | luna              | 35   | 17.2315 | 3.98 |
| chr2R | 11173478 | 11174033 | shn               | 19   | 23.2628 | 4.15 |
| chr2R | 11218972 | 11220476 | CG9084            | 57   | 15.2101 | 4.43 |
| chr2R | 11218972 | 11220476 | Syx6              | 354  | 15.2101 | 4.43 |
| chr2R | 11218972 | 11220476 | CG9084            | 587  | 15.2101 | 4.43 |
| chr2R | 11218972 | 11220476 | Syx6              | 749  | 15.2101 | 4.43 |
| chr2R | 11222765 | 11223150 | CG7737            | 56   | 10.9184 | 3.22 |
| chr2R | 11279367 | 11280186 | CG9067            | 113  | 20.7679 | 4.25 |
| chr2R | 11279367 | 11280186 | Vhl               | 72   | 20.7679 | 4.25 |
| chr2R | 11283526 | 11284864 | CG9062            | 110  | 24.3459 | 4.54 |
| chr2R | 11283526 | 11284864 | CG13220           | 421  | 24.3459 | 4.54 |
| chr2R | 11289041 | 11290007 | Fbl6              | 509  | 25.0015 | 4.01 |
| chr2R | 11306923 | 11308464 | Fpps              | 108  | 38.0486 | 6.22 |
| chr2R | 11306923 | 11308464 | CG7745            | 458  | 38.0486 | 6.22 |
| chr2R | 11358737 | 11359247 | CG12384           | 124  | 22.6239 | 4.14 |
| chr2R | 11359792 | 11360209 | ix                | 169  | 17.1334 | 3.86 |
| chr2R | 11366273 | 11366822 | CG13204           | 110  | 30.4094 | 5.49 |
| chr2R | 11397266 | 11397556 | sprt              | 41   | 8.46252 | 3.18 |
| chr2R | 11451790 | 11453421 | E(Pc)             | 51   | 26.492  | 4.64 |
| chr2R | 11604430 | 11605359 | tou               | 127  | 15.3692 | 3.48 |
| chr2R | 11631639 | 11632853 | CG9005            | 52   | 29.9359 | 4.70 |
| chr2R | 11852549 | 11853109 | Mtor              | 176  | 12.3502 | 3.27 |
| chr2R | 11885149 | 11885884 | CG13185           | 65   | 57.7513 | 8.15 |
| chr2R | 11890237 | 11891102 | ERp60             | 215  | 18.098  | 3.68 |
| chr2R | 11891937 | 11893567 | Ef1alpha48D       | 85   | 40.9057 | 5.04 |
| chr2R | 11891937 | 11893567 | snRNA:Me28S-A1322 | 916  | 40.9057 | 5.04 |
| chr2R | 11891937 | 11893567 | Ef1alpha48D       | 1335 | 40.9057 | 5.04 |
| chr2R | 11899432 | 11900040 | Zip48C            | 104  | 23.7089 | 4.14 |
| chr2R | 11903590 | 11903987 | MCPH1             | 150  | 10.7353 | 3.22 |
| chr2R | 12027346 | 12028965 | Mppe              | 456  | 37.2866 | 5.60 |
| chr2R | 12027346 | 12028965 | pds5              | 179  | 37.2866 | 5.60 |
| chr2R | 12033851 | 12034869 | CG8321            | 56   | 22.3101 | 4.18 |
| chr2R | 12037215 | 12037908 | 128up             | 100  | 15.8437 | 3.85 |
| chr2R | 12044520 | 12044945 | Drep1             | 110  | 14.4835 | 3.12 |
| chr2R | 12145666 | 12146061 | Hen1              | 167  | 22.5331 | 4.72 |
| chr2R | 12150237 | 12151188 | CG8878            | 210  | 25.041  | 4.55 |
| chr2R | 12162437 | 12163148 | Prp8              | 64   | 20.9293 | 4.08 |
| chr2R | 12170333 | 12171737 | mir-281-1         | 710  | 25.9379 | 4.77 |
| chr2R | 12170333 | 12171737 | Oda               | 113  | 25.9379 | 4.77 |
| chr2R | 12170333 | 12171737 | CR46194           | 140  | 25.9379 | 4.77 |
| chr2R | 12172698 | 12174433 | Oda               | 49   | 22.2338 | 3.95 |
| chr2R | 12200027 | 12200955 | RpS11             | 209  | 36.5996 | 6.10 |
| chr2R | 12259113 | 12259692 | Cam               | 55   | 18.8931 | 3.82 |
| chr2R | 12259113 | 12259692 | CR43900           | 44   | 18.8931 | 3.82 |
| chr2R | 12325665 | 12326859 | CG8841            | 106  | 21.8188 | 4.24 |

|       |          |          |            |      |         |      |
|-------|----------|----------|------------|------|---------|------|
| chr2R | 12325665 | 12326859 | garz       | 5    | 21.8188 | 4.24 |
| chr2R | 12337675 | 12338577 | Den1       | 80   | 22.3401 | 4.62 |
| chr2R | 12343791 | 12345000 | CG8839     | 146  | 27.0287 | 4.74 |
| chr2R | 12343791 | 12345000 | ana3       | 511  | 27.0287 | 4.74 |
| chr2R | 12423489 | 12423971 | CG8520     | 158  | 12.5329 | 3.26 |
| chr2R | 12430635 | 12431075 | Nup54      | 323  | 8.98345 | 3.07 |
| chr2R | 12435193 | 12438259 | DUBAI      | 1594 | 25.1125 | 4.10 |
| chr2R | 12435193 | 12438259 | CG30051    | 1311 | 25.1125 | 4.10 |
| chr2R | 12435193 | 12438259 | DUBAI      | 853  | 25.1125 | 4.10 |
| chr2R | 12435193 | 12438259 | Dyb        | 86   | 25.1125 | 4.10 |
| chr2R | 12468567 | 12469117 | CG8545     | 125  | 23.603  | 4.46 |
| chr2R | 12474105 | 12474519 | Dh44-R2    | 132  | 20.9293 | 4.08 |
| chr2R | 12518563 | 12519534 | CG8818     | 259  | 10.1185 | 3.12 |
| chr2R | 12518563 | 12519534 | CG8569     | 6    | 10.1185 | 3.12 |
| chr2R | 12528711 | 12529514 | fra        | 55   | 22.4665 | 4.16 |
| chr2R | 12572040 | 12572459 | CIC-b      | 135  | 13.4096 | 3.17 |
| chr2R | 12586702 | 12590387 | Sin3A      | 96   | 26.0154 | 4.24 |
| chr2R | 12586702 | 12590387 | CR30055    | 10   | 26.0154 | 4.24 |
| chr2R | 12591122 | 12593008 | Sin3A      | 1114 | 14.4835 | 3.36 |
| chr2R | 12612459 | 12613497 | CG45086    | 409  | 18.0897 | 3.85 |
| chr2R | 12612459 | 12613497 | Galphaq    | 409  | 18.0897 | 3.85 |
| chr2R | 12635723 | 12637259 | CG33672    | 740  | 19.4731 | 3.87 |
| chr2R | 12635723 | 12637259 | CG33671    | 740  | 19.4731 | 3.87 |
| chr2R | 12635723 | 12637259 | lswi       | 211  | 19.4731 | 3.87 |
| chr2R | 12692395 | 12692761 | CG8768     | 76   | 8.08118 | 3.07 |
| chr2R | 12705000 | 12705416 | CG42663    | 63   | 20.2554 | 4.38 |
| chr2R | 12755854 | 12758159 | Taz        | 1377 | 28.6233 | 4.79 |
| chr2R | 12755854 | 12758159 | mRpL18     | 1358 | 28.6233 | 4.79 |
| chr2R | 12755854 | 12758159 | ox         | 262  | 28.6233 | 4.79 |
| chr2R | 12755854 | 12758159 | Dgkepsilon | 162  | 28.6233 | 4.79 |
| chr2R | 12760217 | 12760969 | Nacalpa    | 1    | 21.8608 | 4.65 |
| chr2R | 12870107 | 12870993 | bic        | 185  | 40.3316 | 5.55 |
| chr2R | 12880134 | 12880682 | Nmda1      | 148  | 18.0261 | 4.27 |
| chr2R | 12880134 | 12880682 | Aats-asp   | 53   | 18.0261 | 4.27 |
| chr2R | 12915989 | 12917087 | NAT1       | 512  | 14.3293 | 3.30 |
| chr2R | 12935962 | 12936957 | CG13322    | 59   | 20.5596 | 3.89 |
| chr2R | 12935962 | 12936957 | Sans       | 414  | 20.5596 | 3.89 |
| chr2R | 12980194 | 12981171 | Psc        | 72   | 34.8511 | 4.64 |
| chr2R | 12990761 | 12991365 | CG33798    | 2863 | 15.5555 | 3.40 |
| chr2R | 12996143 | 12997419 | Su(z)2     | 5    | 21.2917 | 3.48 |
| chr2R | 13133128 | 13133496 | Cap-G      | 188  | 10.8909 | 3.21 |
| chr2R | 13152146 | 13152705 | Ack-like   | 297  | 18.0222 | 4.09 |
| chr2R | 13158695 | 13159102 | ND-MWFE    | 211  | 12.5329 | 3.26 |
| chr2R | 13170999 | 13172078 | AGBE       | 48   | 27.289  | 4.10 |
| chr2R | 13198830 | 13199299 | Aats-val   | 90   | 10.0428 | 3.15 |
| chr2R | 13221858 | 13223917 | Fsn        | 64   | 28.6173 | 5.08 |
| chr2R | 13221858 | 13223917 | Dp         | 30   | 28.6173 | 5.08 |
| chr2R | 13221858 | 13223917 | Fsn        | 57   | 28.6173 | 5.08 |
| chr2R | 13221858 | 13223917 | Dp         | 1188 | 28.6173 | 5.08 |
| chr2R | 13429653 | 13430341 | CG42321    | 5    | 29.9528 | 4.90 |
| chr2R | 13482445 | 13483366 | arr        | 101  | 29.275  | 4.64 |
| chr2R | 13484865 | 13485353 | cbc        | 204  | 12.5329 | 3.26 |
| chr2R | 13494425 | 13495461 | bbc        | 146  | 22.7821 | 4.12 |
| chr2R | 13506387 | 13508051 | mip120     | 1362 | 24.478  | 4.17 |
| chr2R | 13506387 | 13508051 | EfTuM      | 235  | 24.478  | 4.17 |
| chr2R | 13592286 | 13593447 | CG6191     | 117  | 14.4835 | 3.12 |

|       |          |          |                   |      |         |      |
|-------|----------|----------|-------------------|------|---------|------|
| chr2R | 13592286 | 13593447 | CG45088           | 117  | 14.4835 | 3.12 |
| chr2R | 13821837 | 13823035 | fl(2)d            | 1680 | 18.4467 | 4.12 |
| chr2R | 13853683 | 13854539 | CG6543            | 60   | 60.914  | 7.12 |
| chr2R | 13859008 | 13859380 | Uba3              | 221  | 9.31717 | 3.26 |
| chr2R | 13897464 | 13898030 | shot              | 5    | 29.1409 | 4.13 |
| chr2R | 13941030 | 13942333 | shot              | 28   | 34.4785 | 4.89 |
| chr2R | 13953648 | 13954947 | AGO1              | 90   | 22.7768 | 4.26 |
| chr2R | 13953648 | 13954947 | mRpL53            | 259  | 22.7768 | 4.26 |
| chr2R | 13953648 | 13954947 | CG33155           | 259  | 22.7768 | 4.26 |
| chr2R | 13956794 | 13958311 | AGO1              | 169  | 22.1547 | 4.20 |
| chr2R | 13959795 | 13961383 | Rpn13             | 420  | 28.2129 | 4.67 |
| chr2R | 13959795 | 13961383 | Cp1               | 150  | 28.2129 | 4.67 |
| chr2R | 13991045 | 13991393 | mam               | 15   | 16.4597 | 3.60 |
| chr2R | 14006781 | 14007223 | mir-4978          | 1018 | 24.6353 | 4.15 |
| chr2R | 14140307 | 14141622 | Prosap            | 38   | 23.107  | 4.37 |
| chr2R | 14152053 | 14153605 | Rcd1              | 106  | 27.9015 | 5.42 |
| chr2R | 14152053 | 14153605 | pea               | 550  | 27.9015 | 5.42 |
| chr2R | 14164202 | 14165573 | Tango7            | 65   | 13.933  | 3.46 |
| chr2R | 14164202 | 14165573 | CG8323            | 494  | 13.933  | 3.46 |
| chr2R | 14170322 | 14171369 | CG8331            | 76   | 14.4838 | 3.51 |
| chr2R | 14170322 | 14171369 | CR44368           | 380  | 14.4838 | 3.51 |
| chr2R | 14170322 | 14171369 | CG8331            | 622  | 14.4838 | 3.51 |
| chr2R | 14185039 | 14186845 | CG30069           | 55   | 38.6997 | 5.53 |
| chr2R | 14212176 | 14213115 | Sox15             | 45   | 12.5551 | 3.45 |
| chr2R | 14215921 | 14217160 | RpS23             | 103  | 18.0578 | 3.52 |
| chr2R | 14234915 | 14235486 | Opa1              | 243  | 16.1486 | 3.72 |
| chr2R | 14239288 | 14240433 | CG8485            | 86   | 15.1903 | 3.49 |
| chr2R | 14239288 | 14240433 | Usp20-33          | 425  | 15.1903 | 3.49 |
| chr2R | 14255511 | 14256948 | Hsc70-5           | 162  | 37.0135 | 5.16 |
| chr2R | 14255511 | 14256948 | CG8531            | 593  | 37.0135 | 5.16 |
| chr2R | 14258883 | 14259416 | beta4GalNAcTA     | 12   | 19.6847 | 4.21 |
| chr2R | 14270250 | 14271003 | SeID              | 234  | 16.8083 | 3.43 |
| chr2R | 14270250 | 14271003 | conv              | 304  | 16.8083 | 3.43 |
| chr2R | 14288894 | 14289776 | lh                | 49   | 18.0222 | 4.09 |
| chr2R | 14352130 | 14352756 | CG8613            | 75   | 22.4738 | 4.65 |
| chr2R | 14356647 | 14357420 | CG8617            | 160  | 13.7586 | 3.38 |
| chr2R | 14360036 | 14360418 | Arc1              | 47   | 31.7752 | 5.76 |
| chr2R | 14361821 | 14362478 | Arc2              | 62   | 28.0496 | 5.38 |
| chr2R | 14362943 | 14363464 | Tfb1              | 111  | 24.4817 | 4.31 |
| chr2R | 14457906 | 14458367 | Oaz               | 361  | 8.93717 | 3.16 |
| chr2R | 14503033 | 14504796 | Cpsf160           | 563  | 33.7434 | 5.50 |
| chr2R | 14503033 | 14504796 | Asx               | 94   | 33.7434 | 5.50 |
| chr2R | 14513885 | 14514406 | CG30197           | 70   | 15.0256 | 3.59 |
| chr2R | 14575123 | 14575868 | LamC              | 61   | 14.5418 | 3.54 |
| chr2R | 14600631 | 14601740 | Rpl1              | 107  | 40.019  | 6.21 |
| chr2R | 14600631 | 14601740 | Blos1             | 168  | 40.019  | 6.21 |
| chr2R | 14603968 | 14604383 | tra2              | 164  | 12.9449 | 3.19 |
| chr2R | 14617509 | 14618242 | Su(var)2-HP2      | 202  | 22.6589 | 4.69 |
| chr2R | 14618514 | 14619291 | Sec61beta         | 245  | 43.8895 | 5.98 |
| chr2R | 14621000 | 14622165 | CG12863           | 310  | 31.2751 | 4.80 |
| chr2R | 14621000 | 14622165 | Uhg5              | 30   | 31.2751 | 4.80 |
| chr2R | 14621000 | 14622165 | noRNA:Me18S-C1366 | 151  | 31.2751 | 4.80 |
| chr2R | 14621000 | 14622165 | noRNA:Me28S-C3227 | 457  | 31.2751 | 4.80 |
| chr2R | 14645114 | 14645737 | CG10139           | 262  | 13.5778 | 3.39 |
| chr2R | 14751505 | 14752786 | Rpn6              | 96   | 14.2378 | 3.18 |
| chr2R | 14751505 | 14752786 | ave               | 345  | 14.2378 | 3.18 |

|       |          |          |             |      |         |      |
|-------|----------|----------|-------------|------|---------|------|
| chr2R | 14756233 | 14757181 | CG10151     | 320  | 26.4811 | 4.54 |
| chr2R | 14756233 | 14757181 | ND-B15      | 93   | 26.4811 | 4.54 |
| chr2R | 14757445 | 14757896 | Trs31       | 147  | 10.5965 | 3.14 |
| chr2R | 14770375 | 14772145 | BEAF-32     | 1125 | 22.4744 | 4.59 |
| chr2R | 14770375 | 14772145 | CR42254     | 703  | 22.4744 | 4.59 |
| chr2R | 14770375 | 14772145 | BEAF-32     | 678  | 22.4744 | 4.59 |
| chr2R | 14770375 | 14772145 | CR42254     | 298  | 22.4744 | 4.59 |
| chr2R | 14770375 | 14772145 | BEAF-32     | 293  | 22.4744 | 4.59 |
| chr2R | 14847912 | 14848520 | CG10209     | 23   | 16.6008 | 3.91 |
| chr2R | 14854036 | 14855076 | Ciao1       | 148  | 15.7576 | 3.64 |
| chr2R | 14855384 | 14856181 | HPS1        | 244  | 12.9449 | 3.19 |
| chr2R | 14860351 | 14860896 | U3-55K      | 141  | 20.0324 | 4.39 |
| chr2R | 14870471 | 14871090 | Pcf11       | 358  | 15.3956 | 3.34 |
| chr2R | 14881995 | 14882473 | Cyp6a20     | 80   | 30.1036 | 5.50 |
| chr2R | 14928003 | 14928533 | Kank        | 54   | 15.6701 | 4.04 |
| chr2R | 14962135 | 14963609 | aPKC        | 4    | 17.5225 | 3.55 |
| chr2R | 14962135 | 14963609 | ckn         | 326  | 17.5225 | 3.55 |
| chr2R | 15127984 | 15129013 | chn         | 53   | 22.8377 | 5.00 |
| chr2R | 15216073 | 15216674 | CG11808     | 113  | 16.6664 | 3.68 |
| chr2R | 15216996 | 15217999 | mRpL41      | 87   | 50.1621 | 6.51 |
| chr2R | 15252467 | 15252950 | scb         | 51   | 17.9766 | 3.79 |
| chr2R | 15310763 | 15311190 | CG8152      | 100  | 13.3967 | 3.49 |
| chr2R | 15321794 | 15323247 | CG8155      | 642  | 38.1784 | 5.56 |
| chr2R | 15321794 | 15323247 | Arf51F      | 11   | 38.1784 | 5.56 |
| chr2R | 15482139 | 15482970 | CG8180      | 105  | 15.8056 | 3.74 |
| chr2R | 15538013 | 15538655 | CG30467     | 178  | 11.2123 | 3.08 |
| chr2R | 15540945 | 15543002 | CG8187      | 151  | 18.4894 | 3.75 |
| chr2R | 15540945 | 15543002 | Vha36-1     | 80   | 18.4894 | 3.75 |
| chr2R | 15540945 | 15543002 | eIF2B-gamma | 1146 | 18.4894 | 3.75 |
| chr2R | 15565080 | 15565786 | CG8195      | 189  | 21.1537 | 4.50 |
| chr2R | 15573542 | 15574115 | CG8204      | 9    | 19.8434 | 4.08 |
| chr2R | 15613484 | 15614366 | CG42524     | 24   | 20.2357 | 4.44 |
| chr2R | 15675450 | 15676815 | fus         | 94   | 12.7164 | 3.26 |
| chr2R | 15675450 | 15676815 | CR45143     | 581  | 12.7164 | 3.26 |
| chr2R | 15675450 | 15676815 | fus         | 810  | 12.7164 | 3.26 |
| chr2R | 15682703 | 15683236 | Ranbp11     | 254  | 16.0217 | 4.13 |
| chr2R | 15734964 | 15735664 | CG30089     | 182  | 10.0304 | 3.25 |
| chr2R | 15816798 | 15817404 | Zasp52      | 61   | 9.82793 | 3.30 |
| chr2R | 15847878 | 15849073 | tun         | 480  | 24.3303 | 3.88 |
| chr2R | 15861316 | 15862226 | Gpo-1       | 113  | 26.2481 | 4.50 |
| chr2R | 15931238 | 15932127 | bdg         | 57   | 11.8392 | 3.20 |
| chr2R | 15991875 | 15992875 | Pex11       | 7    | 13.4155 | 3.32 |
| chr2R | 15991875 | 15992875 | CG8320      | 39   | 13.4155 | 3.32 |
| chr2R | 16000022 | 16001357 | ATPCL       | 37   | 15.0109 | 3.50 |
| chr2R | 16000022 | 16001357 | CG8370      | 930  | 15.0109 | 3.50 |
| chr2R | 16000022 | 16001357 | ATPCL       | 1040 | 15.0109 | 3.50 |
| chr2R | 16001710 | 16002392 | CG8370      | 171  | 17.3003 | 3.84 |
| chr2R | 16007315 | 16007851 | CG8386      | 69   | 13.4155 | 3.32 |
| chr2R | 16017576 | 16018761 | CG8399      | 80   | 35.3711 | 5.52 |
| chr2R | 16047317 | 16048060 | CG8405      | 257  | 10.346  | 3.32 |
| chr2R | 16109177 | 16110029 | Ric         | 205  | 23.1868 | 4.55 |
| chr2R | 16124845 | 16125627 | spin        | 182  | 24.161  | 4.35 |
| chr2R | 16138563 | 16139250 | Got1        | 111  | 32.4772 | 5.16 |
| chr2R | 16142221 | 16143485 | Aats-cys    | 134  | 13.266  | 3.25 |
| chr2R | 16148990 | 16149624 | CG10731     | 222  | 13.1958 | 3.59 |
| chr2R | 16150002 | 16151108 | lbk         | 102  | 25.666  | 3.96 |

|       |          |          |           |      |         |      |
|-------|----------|----------|-----------|------|---------|------|
| chr2R | 16186550 | 16188122 | clu       | 211  | 14.113  | 3.45 |
| chr2R | 16195759 | 16197905 | calypso   | 827  | 43.6796 | 6.57 |
| chr2R | 16195759 | 16197905 | CG44242   | 777  | 43.6796 | 6.57 |
| chr2R | 16195759 | 16197905 | CG42837   | 119  | 43.6796 | 6.57 |
| chr2R | 16195759 | 16197905 | CG44243   | 119  | 43.6796 | 6.57 |
| chr2R | 16226330 | 16226856 | Tsf3      | 42   | 13.7974 | 3.67 |
| chr2R | 16289212 | 16289587 | Jhl-26    | 65   | 20.9201 | 4.23 |
| chr2R | 16293807 | 16294901 | CG7747    | 386  | 37.592  | 5.71 |
| chr2R | 16293807 | 16294901 | Atg9      | 117  | 37.592  | 5.71 |
| chr2R | 16585759 | 16586867 | RpLP2     | 120  | 25.5629 | 4.30 |
| chr2R | 16593952 | 16594946 | CG8306    | 197  | 59.8005 | 7.03 |
| chr2R | 16640864 | 16641366 | gprs      | 152  | 14.9177 | 4.06 |
| chr2R | 16691510 | 16692017 | CG5210    | 46   | 11.9617 | 3.36 |
| chr2R | 16773302 | 16773878 | Sod2      | 385  | 10.5518 | 3.22 |
| chr2R | 16830193 | 16830916 | CR43650   | 56   | 13.0829 | 3.25 |
| chr2R | 16856082 | 16857273 | Dek       | 55   | 26.2299 | 4.71 |
| chr2R | 17015123 | 17016165 | Ehbp1     | 105  | 13.8173 | 3.24 |
| chr2R | 17018634 | 17019572 | CG8963    | 127  | 35.0912 | 5.74 |
| chr2R | 17027123 | 17028442 | RhoGEF2   | 528  | 14.363  | 3.42 |
| chr2R | 17048873 | 17049650 | CG9646    | 45   | 21.5388 | 4.14 |
| chr2R | 17062107 | 17062839 | CG8950    | 103  | 47.101  | 6.87 |
| chr2R | 17062107 | 17062839 | CG6967    | 243  | 47.101  | 6.87 |
| chr2R | 17097189 | 17097778 | GstS1     | 4    | 29.0614 | 4.92 |
| chr2R | 17412712 | 17413207 | Prosalph5 | 77   | 22.4946 | 4.47 |
| chr2R | 17418946 | 17419686 | cnk       | 61   | 17.8796 | 3.53 |
| chr2R | 17427186 | 17427571 | CG6550    | 55   | 10.4574 | 3.17 |
| chr2R | 17430634 | 17431570 | Bap55     | 255  | 23.795  | 4.72 |
| chr2R | 17430634 | 17431570 | Lhr       | 187  | 23.795  | 4.72 |
| chr2R | 17436353 | 17436933 | CG18467   | 3658 | 19.6821 | 3.60 |
| chr2R | 17444133 | 17445129 | EDTP      | 160  | 19.4731 | 3.87 |
| chr2R | 17457466 | 17459018 | CG14478   | 216  | 19.8396 | 4.24 |
| chr2R | 17469522 | 17470219 | qkr54B    | 188  | 28.3467 | 4.64 |
| chr2R | 17484918 | 17485169 | NT5E-2    | 32   | 9.62378 | 3.35 |
| chr2R | 17514124 | 17514815 | CG4853    | 108  | 16.148  | 3.97 |
| chr2R | 17536288 | 17536905 | eIF3-S9   | 173  | 24.478  | 4.17 |
| chr2R | 17546354 | 17548736 | RpL18A    | 703  | 49.9338 | 6.41 |
| chr2R | 17546354 | 17548736 | MESR4     | 126  | 49.9338 | 6.41 |
| chr2R | 17568036 | 17569199 | Ns2       | 378  | 18.9129 | 4.22 |
| chr2R | 17568036 | 17569199 | POSH      | 103  | 18.9129 | 4.22 |
| chr2R | 17592759 | 17593672 | Smurf     | 151  | 35.222  | 5.63 |
| chr2R | 17665435 | 17666535 | eIF3-S8   | 168  | 31.4773 | 4.99 |
| chr2R | 17672029 | 17672621 | P32       | 217  | 16.4597 | 3.60 |
| chr2R | 17682548 | 17684043 | Sema-1b   | 284  | 18.9556 | 3.49 |
| chr2R | 17682548 | 17684043 | HPS4      | 210  | 18.9556 | 3.49 |
| chr2R | 17697554 | 17698495 | rdgBbeta  | 70   | 10.9124 | 3.02 |
| chr2R | 17739202 | 17740463 | CG6401    | 277  | 14.8323 | 3.42 |
| chr2R | 17739202 | 17740463 | CG4996    | 62   | 14.8323 | 3.42 |
| chr2R | 17750189 | 17750523 | CG5002    | 84   | 16.1486 | 3.72 |
| chr2R | 17760988 | 17761983 | CG5009    | 277  | 46.1917 | 5.54 |
| chr2R | 17788688 | 17790109 | Ubc10     | 151  | 31.7667 | 5.27 |
| chr2R | 17788688 | 17790109 | CG5033    | 419  | 31.7667 | 5.27 |
| chr2R | 17800780 | 17801965 | CR45270   | 55   | 22.1547 | 3.86 |
| chr2R | 17800780 | 17801965 | grh       | 125  | 22.1547 | 3.86 |
| chr2R | 17800780 | 17801965 | CR45270   | 463  | 22.1547 | 3.86 |
| chr2R | 17823262 | 17824178 | grh       | 62   | 18.4922 | 4.51 |
| chr2R | 17846319 | 17847069 | olf186-M  | 60   | 13.0185 | 3.36 |

|       |          |          |            |      |         |      |
|-------|----------|----------|------------|------|---------|------|
| chr2R | 17850645 | 17851695 | olf186-F   | 566  | 17.0617 | 3.75 |
| chr2R | 17869032 | 17869695 | CR44417    | 359  | 25.4181 | 3.89 |
| chr2R | 17870200 | 17872224 | Mapmodulin | 42   | 22.7522 | 4.25 |
| chr2R | 18094531 | 18095562 | CG5757     | 272  | 21.5388 | 4.14 |
| chr2R | 18094531 | 18095562 | CG5098     | 232  | 21.5388 | 4.14 |
| chr2R | 18125551 | 18126516 | stau       | 10   | 20.6326 | 4.08 |
| chr2R | 18125551 | 18126516 | Spn55B     | 577  | 20.6326 | 4.08 |
| chr2R | 18133640 | 18134703 | Hsf        | 197  | 18.9194 | 4.06 |
| chr2R | 18140615 | 18142382 | pAbp       | 189  | 18.6225 | 3.65 |
| chr2R | 18150817 | 18152158 | CG5742     | 424  | 26.3597 | 4.67 |
| chr2R | 18150817 | 18152158 | adp        | 81   | 26.3597 | 4.67 |
| chr2R | 18156299 | 18158496 | lolal      | 58   | 28.1065 | 4.51 |
| chr2R | 18156299 | 18158496 | CG10914    | 1422 | 28.1065 | 4.51 |
| chr2R | 18179607 | 18180367 | CG5726     | 261  | 15.9481 | 3.72 |
| chr2R | 18387767 | 18388286 | IM3        | 112  | 8.36405 | 3.11 |
| chr2R | 18387767 | 18388286 | IM3        | 112  | 8.36405 | 3.11 |
| chr2R | 18410813 | 18413119 | imd        | 647  | 64.5252 | 7.51 |
| chr2R | 18410813 | 18413119 | Dp1        | 153  | 64.5252 | 7.51 |
| chr2R | 18439690 | 18441497 | CG30118    | 648  | 32.1714 | 5.05 |
| chr2R | 18439690 | 18441497 | slim       | 159  | 32.1714 | 5.05 |
| chr2R | 18611293 | 18611927 | GEFmeso    | 45   | 18.9979 | 4.07 |
| chr2R | 18638479 | 18639461 | CG30122    | 291  | 58.6836 | 6.62 |
| chr2R | 18687967 | 18689298 | Sik3       | 65   | 29.4678 | 4.44 |
| chr2R | 18754865 | 18755394 | Cyp12b2    | 97   | 22.4738 | 4.31 |
| chr2R | 18776641 | 18777047 | CG15093    | 43   | 12.3103 | 3.60 |
| chr2R | 18796277 | 18796913 | MFS15      | 189  | 19.2325 | 3.79 |
| chr2R | 18801849 | 18802787 | MFS14      | 178  | 16.1001 | 3.38 |
| chr2R | 18819452 | 18819941 | Phb2       | 228  | 28.6174 | 4.59 |
| chr2R | 18829148 | 18829806 | CG15097    | 106  | 18.2193 | 3.88 |
| chr2R | 18834340 | 18835794 | CG15098    | 547  | 31.7752 | 5.76 |
| chr2R | 18834340 | 18835794 | CG15083    | 60   | 31.7752 | 5.76 |
| chr2R | 18846147 | 18846741 | CG15099    | 182  | 28.0815 | 4.70 |
| chr2R | 18850142 | 18850609 | MetRS      | 174  | 14.5491 | 3.73 |
| chr2R | 18857637 | 18858110 | Jheh2      | 24   | 21.8472 | 4.24 |
| chr2R | 19129058 | 19129983 | CG15117    | 405  | 12.8577 | 3.42 |
| chr2R | 19129058 | 19129983 | botv       | 117  | 12.8577 | 3.42 |
| chr2R | 19136617 | 19138370 | CG15118    | 109  | 25.4357 | 4.46 |
| chr2R | 19136617 | 19138370 | CG15111    | 399  | 25.4357 | 4.46 |
| chr2R | 19141512 | 19142670 | ena        | 55   | 17.8061 | 3.80 |
| chr2R | 19155141 | 19155472 | ena        | 54   | 10.9857 | 3.44 |
| chr2R | 19228916 | 19230102 | cora       | 45   | 14.5532 | 3.08 |
| chr2R | 19289910 | 19290737 | FK506-bp2  | 121  | 34.1874 | 5.45 |
| chr2R | 19305113 | 19306002 | CG7461     | 59   | 10.7267 | 3.01 |
| chr2R | 19357485 | 19358628 | CG11961    | 134  | 17.6476 | 3.86 |
| chr2R | 19390075 | 19390531 | CG11257    | 227  | 11.0619 | 3.40 |
| chr2R | 19424025 | 19425479 | hts        | 52   | 27.5357 | 4.33 |
| chr2R | 19424025 | 19425479 | CalpA      | 261  | 27.5357 | 4.33 |
| chr2R | 19436489 | 19437300 | Fak        | 128  | 26.4027 | 4.98 |
| chr2R | 19442109 | 19442887 | RpL11      | 62   | 33.8336 | 4.51 |
| chr2R | 19450698 | 19451758 | betaTub56D | 38   | 60.0998 | 7.14 |
| chr2R | 19496375 | 19497025 | hpo        | 32   | 14.6522 | 3.43 |
| chr2R | 19668908 | 19670174 | hrg        | 4    | 23.6983 | 4.47 |
| chr2R | 20256815 | 20258212 | Ate1       | 258  | 18.0528 | 3.89 |
| chr2R | 20256815 | 20258212 | Hsl        | 517  | 18.0528 | 3.89 |
| chr2R | 20274005 | 20274868 | CG10444    | 68   | 55.28   | 6.06 |
| chr2R | 20274005 | 20274868 | CG11788    | 165  | 55.28   | 6.06 |

|       |          |          |           |      |         |      |
|-------|----------|----------|-----------|------|---------|------|
| chr2R | 20286261 | 20287183 | CG16868   | 108  | 18.4461 | 4.65 |
| chr2R | 20312997 | 20313806 | CG13868   | 68   | 15.3316 | 3.75 |
| chr2R | 20319522 | 20321002 | CG8920    | 88   | 28.0503 | 4.37 |
| chr2R | 20327178 | 20328055 | CG8929    | 153  | 35.7473 | 5.94 |
| chr2R | 20534214 | 20534724 | CG18067   | 15   | 14.8511 | 3.91 |
| chr2R | 20622774 | 20624007 | CG11180   | 4    | 31.3656 | 5.03 |
| chr2R | 20622774 | 20624007 | FAM21     | 113  | 31.3656 | 5.03 |
| chr2R | 20640249 | 20642037 | rig       | 366  | 25.4822 | 5.00 |
| chr2R | 20640249 | 20642037 | maf-S     | 72   | 25.4822 | 5.00 |
| chr2R | 20640249 | 20642037 | CG11110   | 694  | 25.4822 | 5.00 |
| chr2R | 20643311 | 20644519 | CG33786   | 448  | 14.1514 | 3.65 |
| chr2R | 20643311 | 20644519 | CG33785   | 448  | 14.1514 | 3.65 |
| chr2R | 20643311 | 20644519 | DMAP1     | 198  | 14.1514 | 3.65 |
| chr2R | 20666327 | 20667401 | Fem-1     | 193  | 37.3549 | 6.25 |
| chr2R | 20671093 | 20671668 | CG30152   | 148  | 17.9766 | 3.79 |
| chr2R | 20831724 | 20833148 | sktl      | 315  | 13.0413 | 3.50 |
| chr2R | 20994755 | 20998551 | Prosalph3 | 1068 | 19.3915 | 3.78 |
| chr2R | 20994755 | 20998551 | CG10543   | 252  | 19.3915 | 3.78 |
| chr2R | 21016845 | 21017474 | CG3295    | 232  | 15.8278 | 4.02 |
| chr2R | 21056514 | 21057368 | shg       | 49   | 36.4258 | 5.08 |
| chr2R | 21057657 | 21058411 | cpa       | 56   | 25.8869 | 5.15 |
| chr2R | 21060246 | 21061131 | CG15653   | 437  | 14.313  | 3.68 |
| chr2R | 21060246 | 21061131 | mRpL54    | 196  | 14.313  | 3.68 |
| chr2R | 21072111 | 21072992 | CG10527   | 49   | 27.5549 | 4.61 |
| chr2R | 21141718 | 21142327 | Magi      | 31   | 21.4109 | 4.03 |
| chr2R | 21143409 | 21144341 | Xbp1      | 96   | 17.2105 | 3.73 |
| chr2R | 21159993 | 21160656 | CG30389   | 15   | 20.3132 | 3.93 |
| chr2R | 21170946 | 21171357 | Xpd       | 64   | 8.88712 | 3.00 |
| chr2R | 21178816 | 21180021 | Pu        | 21   | 23.603  | 4.46 |
| chr2R | 21183268 | 21183735 | tud       | 203  | 13.4598 | 3.41 |
| chr2R | 21292758 | 21294359 | Sgf29     | 220  | 21.7383 | 3.99 |
| chr2R | 21292758 | 21294359 | RpL29     | 99   | 21.7383 | 3.99 |
| chr2R | 21322745 | 21324479 | CG30394   | 346  | 32.0617 | 5.09 |
| chr2R | 21322745 | 21324479 | dom       | 237  | 32.0617 | 5.09 |
| chr2R | 21379012 | 21379637 | cv-2      | 75   | 16.2152 | 3.83 |
| chr2R | 21385925 | 21386913 | EfSec     | 466  | 13.233  | 3.32 |
| chr2R | 21385925 | 21386913 | Acox57D-p | 62   | 13.233  | 3.32 |
| chr2R | 21480725 | 21481333 | Sdc       | 46   | 21.5388 | 4.14 |
| chr2R | 21496629 | 21497717 | Fkbp14    | 48   | 20.0928 | 3.73 |
| chr2R | 21522252 | 21522930 | Egfr      | 76   | 15.7598 | 3.33 |
| chr2R | 21546324 | 21546937 | Egfr      | 84   | 13.2485 | 3.71 |
| chr2R | 21611422 | 21612252 | CG15673   | 1274 | 9.6128  | 3.09 |
| chr2R | 21612632 | 21613281 | CG15673   | 51   | 17.0699 | 4.00 |
| chr2R | 21616268 | 21616910 | CG18870   | 217  | 23.8572 | 4.25 |
| chr2R | 21623919 | 21624536 | PTP-ER    | 181  | 30.2028 | 4.64 |
| chr2R | 21633906 | 21635347 | CR42547   | 628  | 13.6828 | 3.18 |
| chr2R | 21633906 | 21635347 | CG10321   | 10   | 13.6828 | 3.18 |
| chr2R | 21645895 | 21646799 | CG10082   | 49   | 19.1506 | 3.62 |
| chr2R | 21662026 | 21662905 | pirk      | 42   | 8.91069 | 3.06 |
| chr2R | 21685155 | 21685747 | CG10306   | 224  | 14.7514 | 3.83 |
| chr2R | 21687111 | 21687760 | Tbp       | 83   | 18.3198 | 4.34 |
| chr2R | 21688084 | 21688937 | CG30285   | 37   | 39.3626 | 5.63 |
| chr2R | 21688084 | 21688937 | CG10307   | 264  | 39.3626 | 5.63 |
| chr2R | 21690702 | 21691295 | Tim10     | 189  | 26.3532 | 4.85 |
| chr2R | 21690702 | 21691295 | CG42497   | 189  | 26.3532 | 4.85 |
| chr2R | 21690702 | 21691295 | Tim10     | 189  | 26.3532 | 4.85 |



|       |          |          |             |      |         |      |
|-------|----------|----------|-------------|------|---------|------|
| chr2R | 21690702 | 21691295 | CG42496     | 344  | 26.3532 | 4.85 |
| chr2R | 21690702 | 21691295 | Ppcdc       | 344  | 26.3532 | 4.85 |
| chr2R | 21696712 | 21697145 | CngB        | 243  | 15.9866 | 4.00 |
| chr2R | 21702691 | 21705057 | HmgZ        | 409  | 15.6213 | 3.53 |
| chr2R | 21973027 | 21973556 | CG9304      | 143  | 17.5212 | 4.10 |
| chr2R | 22075845 | 22076511 | GlcT-1      | 69   | 35.9049 | 5.75 |
| chr2R | 22080037 | 22080699 | Synj        | 96   | 15.4662 | 3.83 |
| chr2R | 22099164 | 22099716 | CG11073     | 33   | 32.1714 | 5.05 |
| chr2R | 22174139 | 22175220 | CG3045      | 61   | 9.61014 | 3.01 |
| chr2R | 22174139 | 22175220 | CG6758      | 291  | 9.61014 | 3.01 |
| chr2R | 22185981 | 22186434 | Vps35       | 141  | 10.8826 | 3.18 |
| chr2R | 22243723 | 22244180 | dve         | 54   | 17.3931 | 3.96 |
| chr2R | 22311665 | 22312258 | wdp         | 35   | 22.1008 | 4.45 |
| chr2R | 22317419 | 22319021 | Gp150       | 66   | 29.8249 | 4.54 |
| chr2R | 22410989 | 22412227 | qkr58E-3    | 93   | 17.0617 | 3.75 |
| chr2R | 22410989 | 22412227 | Mes4        | 336  | 17.0617 | 3.75 |
| chr2R | 22415098 | 22416348 | qkr58E-1    | 197  | 29.752  | 4.98 |
| chr2R | 22415098 | 22416348 | qkr58E-2    | 238  | 29.752  | 4.98 |
| chr2R | 22483247 | 22483628 | CG4554      | 57   | 8.95089 | 3.07 |
| chr2R | 22561415 | 22562233 | px          | 86   | 47.7586 | 6.99 |
| chr2R | 22592414 | 22593078 | dnr1        | 22   | 16.1079 | 3.62 |
| chr2R | 22605965 | 22606697 | RpS16       | 161  | 44.8735 | 6.87 |
| chr2R | 22637295 | 22637856 | Cdk9        | 161  | 16.8296 | 3.85 |
| chr2R | 22637295 | 22637856 | bonsai      | 203  | 16.8296 | 3.85 |
| chr2R | 22640663 | 22641489 | RpS24       | 147  | 34.593  | 5.11 |
| chr2R | 22645591 | 22646494 | CG2852      | 64   | 38.5457 | 5.62 |
| chr2R | 22667074 | 22667556 | CG30273     | 44   | 18.4467 | 4.12 |
| chr2R | 22667074 | 22667556 | CG30269     | 44   | 18.4467 | 4.12 |
| chr2R | 22669256 | 22669908 | CG13516     | 80   | 20.4687 | 4.62 |
| chr2R | 22670490 | 22671390 | RYBP        | 22   | 26.6086 | 4.56 |
| chr2R | 22678083 | 22678673 | CR44761     | 4654 | 15.4302 | 3.28 |
| chr2R | 22686055 | 22686424 | Ppa         | 2810 | 11.8909 | 3.14 |
| chr2R | 22688372 | 22689218 | Ppa         | 3    | 18.0528 | 3.89 |
| chr2R | 22688372 | 22689218 | CR44762     | 104  | 18.0528 | 3.89 |
| chr2R | 22740179 | 22740951 | jbug        | 40   | 16.2152 | 3.83 |
| chr2R | 22798772 | 22799971 | blw         | 105  | 28.596  | 4.79 |
| chr2R | 22853449 | 22853892 | CG13531     | 16   | 25.9773 | 4.78 |
| chr2R | 22885484 | 22887020 | CG3499      | 447  | 27.7017 | 4.80 |
| chr2R | 22885484 | 22887020 | asrij       | 134  | 27.7017 | 4.80 |
| chr2R | 22895997 | 22896753 | nahoda      | 50   | 20.8177 | 4.43 |
| chr2R | 22933587 | 22934960 | CG3788      | 162  | 23.9355 | 4.63 |
| chr2R | 22935646 | 22937045 | CG3800      | 198  | 37.0943 | 5.28 |
| chr2R | 22998730 | 22999012 | CG9896      | 17   | 12.9449 | 3.19 |
| chr2R | 23356618 | 23357567 | CG3500      | 77   | 16.7675 | 3.89 |
| chr2R | 23365859 | 23366320 | vir         | 238  | 16.8032 | 3.43 |
| chr2R | 23366796 | 23367454 | lce1        | 125  | 17.9236 | 3.69 |
| chr2R | 23376421 | 23377098 | Golgin245   | 228  | 19.2325 | 3.79 |
| chr2R | 23385782 | 23386776 | CG30415     | 337  | 22.3997 | 3.93 |
| chr2R | 23385782 | 23386776 | eIF2B-delta | 426  | 22.3997 | 3.93 |
| chr2R | 23419060 | 23419891 | CG9812      | 49   | 14.8323 | 3.51 |
| chr2R | 23523056 | 23524254 | RabX1       | 170  | 22.1754 | 4.06 |
| chr2R | 23523056 | 23524254 | mi          | 72   | 22.1754 | 4.06 |
| chr2R | 23546776 | 23548786 | wmd         | 216  | 31.9013 | 5.43 |
| chr2R | 23546776 | 23548786 | levy        | 129  | 31.9013 | 5.43 |
| chr2R | 23560402 | 23561021 | Pi3K59F     | 117  | 19.8396 | 4.24 |
| chr2R | 23667061 | 23667413 | Pde8        | 115  | 16.7966 | 3.79 |

|       |          |          |          |      |         |      |
|-------|----------|----------|----------|------|---------|------|
| chr2R | 23701504 | 23702848 | sigmar   | 137  | 18.6132 | 4.27 |
| chr2R | 23701504 | 23702848 | l(2)dtl  | 207  | 18.6132 | 4.27 |
| chr2R | 23706807 | 23707527 | l(2)tid  | 161  | 23.1868 | 4.55 |
| chr2R | 23709408 | 23710081 | l(2)not  | 33   | 30.2242 | 4.84 |
| chr2R | 23712019 | 23714184 | Sesn     | 0    | 41.4038 | 5.77 |
| chr2R | 23745780 | 23746969 | egl      | 91   | 32.0738 | 4.83 |
| chr2R | 23849836 | 23851156 | eIF6     | 589  | 18.098  | 3.68 |
| chr2R | 23849836 | 23851156 | CR45928  | 561  | 18.098  | 3.68 |
| chr2R | 23849836 | 23851156 | ytr      | 183  | 18.098  | 3.68 |
| chr2R | 23851480 | 23851896 | ytr      | 193  | 14.85   | 3.60 |
| chr2R | 23851480 | 23851896 | gbb      | 112  | 14.85   | 3.60 |
| chr2R | 23856554 | 23857083 | Pym      | 12   | 29.6618 | 4.80 |
| chr2R | 23864658 | 23865824 | CG4585   | 18   | 18.4788 | 3.97 |
| chr2R | 23864658 | 23865824 | CG5569   | 3    | 18.4788 | 3.97 |
| chr2R | 23868156 | 23868682 | Thiolase | 153  | 19.402  | 4.00 |
| chr2R | 23871524 | 23872297 | ken      | 1892 | 9.7724  | 3.04 |
| chr2R | 23881981 | 23882514 | CG4882   | 147  | 13.2926 | 3.72 |
| chr2R | 23897837 | 23899018 | CG5339   | 513  | 23.7122 | 4.65 |
| chr2R | 23897837 | 23899018 | Lpt      | 199  | 23.7122 | 4.65 |
| chr2R | 23906552 | 23907413 | Nap1     | 30   | 58.1477 | 7.76 |
| chr2R | 23932797 | 23933885 | SERCA    | 209  | 27.4635 | 4.46 |
| chr2R | 23939136 | 23940804 | CG3735   | 717  | 23.9784 | 4.58 |
| chr2R | 23939136 | 23940804 | Taldo    | 62   | 23.9784 | 4.58 |
| chr2R | 23969827 | 23970831 | CG10904  | 494  | 17.0541 | 4.00 |
| chr2R | 23969827 | 23970831 | CG3065   | 263  | 17.0541 | 4.00 |
| chr2R | 23978301 | 23979939 | Sox14    | 272  | 25.5873 | 3.88 |
| chr2R | 24021716 | 24022670 | CG3907   | 281  | 23.6413 | 4.76 |
| chr2R | 24021716 | 24022670 | CG11388  | 484  | 23.6413 | 4.76 |
| chr2R | 24026337 | 24027348 | EbpIII   | 68   | 21.6308 | 4.42 |
| chr2R | 24028436 | 24028885 | HSPC300  | 138  | 21.2486 | 4.04 |
| chr2R | 24029191 | 24029773 | CG3163   | 51   | 18.1467 | 3.77 |
| chr2R | 24045323 | 24046941 | tsr      | 104  | 30.2242 | 4.84 |
| chr2R | 24057647 | 24058248 | eIF-5A   | 175  | 19.2693 | 3.72 |
| chr2R | 24062057 | 24062446 | RpL39    | 188  | 14.85   | 3.60 |
| chr2R | 24086308 | 24087085 | snama    | 129  | 21.2353 | 3.83 |
| chr2R | 24097901 | 24098671 | gek      | 180  | 33.096  | 5.38 |
| chr2R | 24132489 | 24134481 | tamo     | 173  | 36.5598 | 5.42 |
| chr2R | 24132489 | 24134481 | Zfrp8    | 610  | 36.5598 | 5.42 |
| chr2R | 24173802 | 24175588 | mRpS17   | 481  | 24.0111 | 4.23 |
| chr2R | 24173802 | 24175588 | Nop60B   | 46   | 24.0111 | 4.23 |
| chr2R | 24186307 | 24187190 | ocm      | 61   | 15.1909 | 3.62 |
| chr2R | 24197700 | 24198228 | CG3356   | 72   | 14.1207 | 3.37 |
| chr2R | 24401664 | 24403388 | Slik     | 207  | 35.6204 | 5.06 |
| chr2R | 24401664 | 24403388 | Rpn8     | 827  | 35.6204 | 5.06 |
| chr2R | 24514428 | 24515389 | Letm1    | 154  | 14.1855 | 3.24 |
| chr2R | 24531464 | 24532566 | CG13585  | 176  | 19.5406 | 4.29 |
| chr2R | 24560596 | 24561147 | Nurf-38  | 98   | 20.8154 | 3.97 |
| chr2R | 24570868 | 24572068 | CG3511   | 140  | 30.2937 | 5.26 |
| chr2R | 24570868 | 24572068 | Fcp1     | 174  | 30.2937 | 5.26 |
| chr2R | 24570868 | 24572068 | CG3511   | 362  | 30.2937 | 5.26 |
| chr2R | 24580948 | 24581762 | pio      | 132  | 19.5406 | 4.29 |
| chr2R | 24598883 | 24600340 | ATPsynF  | 257  | 29.5256 | 4.78 |
| chr2R | 24598883 | 24600340 | CG3548   | 132  | 29.5256 | 4.78 |
| chr2R | 24603525 | 24603975 | CG3570   | 105  | 14.3921 | 3.60 |
| chr2R | 24606554 | 24608033 | CG4707   | 202  | 35.7108 | 5.34 |
| chr2R | 24606554 | 24608033 | CG42360  | 445  | 35.7108 | 5.34 |

|       |          |          |          |     |         |      |
|-------|----------|----------|----------|-----|---------|------|
| chr2R | 24606554 | 24608033 | CG42361  | 851 | 35.7108 | 5.34 |
| chr2R | 24664402 | 24665098 | ND-19    | 224 | 32.6609 | 5.19 |
| chr2R | 24668753 | 24669868 | CG33228  | 24  | 13.1871 | 3.44 |
| chr2R | 24668753 | 24669868 | Pof      | 90  | 13.1871 | 3.44 |
| chr2R | 24762732 | 24763558 | CG12848  | 183 | 30.659  | 5.33 |
| chr2R | 24762732 | 24763558 | CG3894   | 111 | 30.659  | 5.33 |
| chr2R | 24767315 | 24768346 | GstE12   | 89  | 32.8696 | 5.11 |
| chr2R | 24774654 | 24775251 | Eps-15   | 181 | 13.7586 | 3.38 |
| chr2R | 24793072 | 24794205 | Reg-5    | 171 | 22.1773 | 4.36 |
| chr2R | 24793072 | 24794205 | CR43257  | 225 | 22.1773 | 4.36 |
| chr2R | 24797098 | 24797478 | Orc4     | 93  | 17.835  | 4.05 |
| chr2R | 24814431 | 24815024 | Dll      | 60  | 13.3129 | 3.19 |
| chr2R | 24927876 | 24928436 | pain     | 65  | 15.3751 | 3.41 |
| chr2R | 24940045 | 24940650 | CG2811   | 44  | 23.0834 | 4.22 |
| chr2R | 24947998 | 24948828 | CG2790   | 39  | 21.9015 | 3.98 |
| chr2R | 24947998 | 24948828 | CG12851  | 305 | 21.9015 | 3.98 |
| chr2R | 24963959 | 24965300 | CG2765   | 43  | 30.659  | 5.33 |
| chr2R | 24969077 | 24970098 | RpL19    | 21  | 27.2717 | 4.34 |
| chr2R | 24969077 | 24970098 | CG3776   | 189 | 27.2717 | 4.34 |
| chr2R | 24982734 | 24983523 | emp      | 64  | 26.4932 | 4.87 |
| chr2R | 25011063 | 25011664 | zip      | 105 | 40.9057 | 5.04 |
| chr3L | 129319   | 129711   | Pdk1     | 55  | 20.267  | 3.72 |
| chr3L | 198753   | 200926   | rno      | 379 | 67.4611 | 6.41 |
| chr3L | 198753   | 200926   | mri      | 790 | 67.4611 | 6.41 |
| chr3L | 211026   | 211756   | CG7028   | 202 | 29.4799 | 5.24 |
| chr3L | 224013   | 226488   | CG33229  | 179 | 37.5101 | 5.13 |
| chr3L | 224013   | 226488   | CR42862  | 179 | 37.5101 | 5.13 |
| chr3L | 246139   | 247140   | E(bx)    | 260 | 15.2362 | 3.68 |
| chr3L | 262090   | 265260   | Tudor-SN | 177 | 22.0067 | 3.51 |
| chr3L | 262090   | 265260   | mRpL17   | 575 | 22.0067 | 3.51 |
| chr3L | 291811   | 293087   | RhoGEF3  | 119 | 27.9244 | 4.73 |
| chr3L | 319052   | 320062   | fwd      | 37  | 29.2582 | 4.64 |
| chr3L | 340651   | 341598   | mthl10   | 19  | 17.1334 | 3.86 |
| chr3L | 360877   | 362123   | Cdc5     | 141 | 26.8078 | 4.99 |
| chr3L | 360877   | 362123   | CG1233   | 53  | 26.8078 | 4.99 |
| chr3L | 377819   | 378433   | trh      | 875 | 46.9396 | 6.77 |
| chr3L | 539876   | 541348   | klar     | 54  | 36.7239 | 4.89 |
| chr3L | 539876   | 541348   | CG17180  | 290 | 36.7239 | 4.89 |
| chr3L | 593105   | 593675   | MED14    | 161 | 38.5457 | 5.62 |
| chr3L | 603319   | 604200   | CG13893  | 81  | 31.0275 | 4.87 |
| chr3L | 606203   | 607007   | Reg-2    | 30  | 25.5021 | 4.93 |
| chr3L | 616589   | 617216   | CR42719  | 393 | 21.1452 | 4.92 |
| chr3L | 627825   | 628819   | CR43334  | 68  | 22.6849 | 4.34 |
| chr3L | 653415   | 654648   | MED30    | 144 | 16.9176 | 3.68 |
| chr3L | 653415   | 654648   | Rev1     | 417 | 16.9176 | 3.68 |
| chr3L | 681567   | 682785   | CG3386   | 20  | 20.7279 | 3.87 |
| chr3L | 837081   | 838469   | CG13901  | 27  | 20.4297 | 4.30 |
| chr3L | 837081   | 838469   | CG13887  | 256 | 20.4297 | 4.30 |
| chr3L | 881438   | 882328   | CG13907  | 105 | 17.0617 | 3.75 |
| chr3L | 894871   | 896297   | CG34056  | 49  | 23.603  | 4.46 |
| chr3L | 1034274  | 1035884  | CG9205   | 84  | 20.7897 | 3.69 |
| chr3L | 1034274  | 1035884  | trio     | 95  | 20.7897 | 3.69 |
| chr3L | 1034274  | 1035884  | CG9205   | 404 | 20.7897 | 3.69 |
| chr3L | 1204482  | 1205192  | CG9119   | 37  | 12.9163 | 3.48 |
| chr3L | 1247383  | 1248697  | Psf1     | 382 | 24.6739 | 4.44 |
| chr3L | 1247383  | 1248697  | Sac1     | 40  | 24.6739 | 4.44 |

|       |         |         |           |      |         |      |
|-------|---------|---------|-----------|------|---------|------|
| chr3L | 1306800 | 1307837 | CG2277    | 52   | 14.2623 | 3.03 |
| chr3L | 1306800 | 1307837 | CG2469    | 163  | 14.2623 | 3.03 |
| chr3L | 1306800 | 1307837 | CG2277    | 358  | 14.2623 | 3.03 |
| chr3L | 1306800 | 1307837 | CG2469    | 487  | 14.2623 | 3.03 |
| chr3L | 1329654 | 1330996 | ND-ACP    | 219  | 20.5848 | 4.12 |
| chr3L | 1334102 | 1335877 | CG2211    | 333  | 19.4731 | 3.87 |
| chr3L | 1334102 | 1335877 | I(3)02640 | 21   | 19.4731 | 3.87 |
| chr3L | 1334102 | 1335877 | CG2211    | 450  | 19.4731 | 3.87 |
| chr3L | 1341744 | 1342554 | CG2199    | 172  | 16.6352 | 3.59 |
| chr3L | 1349603 | 1350742 | Ptp61F    | 303  | 29.0355 | 4.51 |
| chr3L | 1351096 | 1351537 | 312       | 99   | 23.4355 | 4.92 |
| chr3L | 1463520 | 1464101 | rho       | 50   | 19.7164 | 4.39 |
| chr3L | 1501839 | 1502819 | pUf68     | 173  | 17.3447 | 3.55 |
| chr3L | 1533535 | 1533994 | lml1      | 166  | 9.98653 | 3.18 |
| chr3L | 1536125 | 1537909 | CG12091   | 435  | 41.5133 | 5.85 |
| chr3L | 1536125 | 1537909 | CG7852    | 134  | 41.5133 | 5.85 |
| chr3L | 1545982 | 1546857 | Cct1      | 159  | 23.5867 | 4.03 |
| chr3L | 1557598 | 1559155 | Pex10     | 662  | 31.5922 | 4.96 |
| chr3L | 1557598 | 1559155 | CG12099   | 405  | 31.5922 | 4.96 |
| chr3L | 1557598 | 1559155 | Pex10     | 108  | 31.5922 | 4.96 |
| chr3L | 1568119 | 1568732 | CG7879    | 117  | 16.6278 | 3.44 |
| chr3L | 1569077 | 1570245 | CG12004   | 181  | 20.9201 | 4.23 |
| chr3L | 1576533 | 1577308 | CG13917   | 9    | 20.2969 | 4.58 |
| chr3L | 1629071 | 1629421 | GC        | 24   | 15.0539 | 4.16 |
| chr3L | 1644778 | 1645650 | alphaCOP  | 32   | 18.0528 | 3.89 |
| chr3L | 1644778 | 1645650 | CG13919   | 299  | 18.0528 | 3.89 |
| chr3L | 1661782 | 1662398 | CG7971    | 2273 | 22.0549 | 4.83 |
| chr3L | 1663497 | 1665467 | CG7971    | 255  | 17.72   | 3.93 |
| chr3L | 1663497 | 1665467 | CG7974    | 328  | 17.72   | 3.93 |
| chr3L | 1667983 | 1669029 | RpL23A    | 109  | 20.6511 | 3.99 |
| chr3L | 1730853 | 1731360 | drpr      | 92   | 13.7504 | 3.34 |
| chr3L | 1741459 | 1741938 | Gk        | 39   | 9.53515 | 3.17 |
| chr3L | 1861188 | 1862391 | Rap1      | 163  | 29.8651 | 4.95 |
| chr3L | 1864518 | 1866093 | HBS1      | 336  | 25.3073 | 4.90 |
| chr3L | 1864518 | 1866093 | CG12025   | 147  | 25.3073 | 4.90 |
| chr3L | 1875936 | 1876494 | dre4      | 142  | 21.8472 | 4.24 |
| chr3L | 1947057 | 1948107 | mu2       | 479  | 21.5451 | 4.29 |
| chr3L | 1947057 | 1948107 | Cnb       | 200  | 21.5451 | 4.29 |
| chr3L | 1963406 | 1965178 | CR45828   | 745  | 21.3964 | 4.32 |
| chr3L | 1963406 | 1965178 | mv        | 267  | 21.3964 | 4.32 |
| chr3L | 1963406 | 1965178 | SCOT      | 13   | 21.3964 | 4.32 |
| chr3L | 2255697 | 2256987 | CG1275    | 45   | 33.9493 | 5.60 |
| chr3L | 2257274 | 2258454 | CG1275    | 456  | 20.9706 | 4.29 |
| chr3L | 2257274 | 2258454 | CG2034    | 237  | 20.9706 | 4.29 |
| chr3L | 2373180 | 2374320 | mRpL23    | 146  | 27.2728 | 4.57 |
| chr3L | 2373180 | 2374320 | CG9004    | 123  | 27.2728 | 4.57 |
| chr3L | 2377152 | 2377803 | CG15877   | 202  | 13.3968 | 3.40 |
| chr3L | 2377152 | 2377803 | CG45186   | 300  | 13.3968 | 3.40 |
| chr3L | 2466733 | 2467338 | CG45186   | 78   | 24.2416 | 4.13 |
| chr3L | 2553402 | 2554517 | Spn       | 3    | 13.6339 | 3.24 |
| chr3L | 2585453 | 2586711 | msn       | 105  | 43.92   | 5.43 |
| chr3L | 2587310 | 2588680 | RpL8      | 168  | 17.8061 | 3.80 |
| chr3L | 2589252 | 2590344 | dos       | 58   | 26.9692 | 4.13 |
| chr3L | 2598924 | 2600325 | CG16985   | 152  | 17.8061 | 3.80 |
| chr3L | 2598924 | 2600325 | CG12182   | 131  | 17.8061 | 3.80 |
| chr3L | 2630990 | 2633262 | MEP-1     | 1193 | 27.0287 | 4.74 |

|       |         |         |               |      |         |      |
|-------|---------|---------|---------------|------|---------|------|
| chr3L | 2630990 | 2633262 | CG42245       | 1193 | 27.0287 | 4.74 |
| chr3L | 2630990 | 2633262 | MEP-1         | 633  | 27.0287 | 4.74 |
| chr3L | 2634936 | 2636427 | MEP-1         | 162  | 24.0111 | 4.23 |
| chr3L | 2771771 | 2772418 | CG9977        | 202  | 25.9862 | 5.10 |
| chr3L | 2773205 | 2775140 | CG12093       | 496  | 42.3659 | 5.86 |
| chr3L | 2773205 | 2775140 | Atg2          | 166  | 42.3659 | 5.86 |
| chr3L | 3035184 | 3036122 | CG2162        | 684  | 14.4835 | 3.36 |
| chr3L | 3037856 | 3038829 | CG2162        | 91   | 13.1443 | 3.03 |
| chr3L | 3045697 | 3047581 | scramb2       | 187  | 38.0636 | 5.79 |
| chr3L | 3045697 | 3047581 | Sk2           | 461  | 38.0636 | 5.79 |
| chr3L | 3050222 | 3050757 | CG32485       | 36   | 19.8968 | 4.56 |
| chr3L | 3052118 | 3052974 | CG1271        | 4    | 19.7391 | 4.33 |
| chr3L | 3059751 | 3061291 | CG16753       | 5768 | 30.4474 | 5.04 |
| chr3L | 3069924 | 3071484 | CG32486       | 112  | 44.755  | 5.93 |
| chr3L | 3069924 | 3071484 | CG11486       | 405  | 44.755  | 5.93 |
| chr3L | 3090548 | 3090949 | snRNA:U5:63BC | 27   | 15.4198 | 4.11 |
| chr3L | 3127362 | 3127847 | prominin-like | 98   | 21.4787 | 3.91 |
| chr3L | 3142665 | 3143535 | CG11537       | 171  | 17.9761 | 4.32 |
| chr3L | 3147752 | 3150066 | Usp5          | 178  | 33.2775 | 5.29 |
| chr3L | 3147752 | 3150066 | BtbVII        | 465  | 33.2775 | 5.29 |
| chr3L | 3159925 | 3160532 | CG15812       | 121  | 14.85   | 3.60 |
| chr3L | 3192195 | 3193533 | CG14965       | 764  | 61.7706 | 7.18 |
| chr3L | 3192195 | 3193533 | Hsp83         | 40   | 61.7706 | 7.18 |
| chr3L | 3193915 | 3194438 | Hsp83         | 840  | 14.4693 | 3.66 |
| chr3L | 3198358 | 3199834 | CG32276       | 124  | 44.9986 | 5.74 |
| chr3L | 3198358 | 3199834 | gry           | 166  | 44.9986 | 5.74 |
| chr3L | 3222620 | 3223996 | RpL28         | 661  | 24.7935 | 4.14 |
| chr3L | 3222620 | 3223996 | CG17737       | 281  | 24.7935 | 4.14 |
| chr3L | 3301057 | 3301418 | CG14968       | 60   | 13.8742 | 3.80 |
| chr3L | 3318810 | 3320310 | PIG-C         | 136  | 25.9435 | 4.55 |
| chr3L | 3318810 | 3320310 | CG12016       | 458  | 25.9435 | 4.55 |
| chr3L | 3318810 | 3320310 | CG42456       | 458  | 25.9435 | 4.55 |
| chr3L | 3325510 | 3326829 | Strip         | 411  | 51.2958 | 5.96 |
| chr3L | 3325510 | 3326829 | PHGPx         | 93   | 51.2958 | 5.96 |
| chr3L | 3336703 | 3337411 | kst           | 57   | 23.4985 | 4.33 |
| chr3L | 3338044 | 3338969 | kst           | 1618 | 14.3326 | 3.79 |
| chr3L | 3373619 | 3374520 | YT521-B       | 56   | 31.5929 | 5.01 |
| chr3L | 3373619 | 3374520 | CG12010       | 167  | 31.5929 | 5.01 |
| chr3L | 3418374 | 3418885 | sty           | 591  | 18.0252 | 3.89 |
| chr3L | 3460143 | 3460804 | eIF5B         | 216  | 17.3447 | 3.55 |
| chr3L | 3625991 | 3626476 | dar1          | 24   | 15.882  | 3.86 |
| chr3L | 3632492 | 3633132 | dar1          | 6575 | 10.8404 | 3.08 |
| chr3L | 3765710 | 3766085 | CG32264       | 173  | 12.2143 | 3.02 |
| chr3L | 3787570 | 3788235 | CG32264       | 165  | 15.2023 | 3.58 |
| chr3L | 3809792 | 3810416 | CG32262       | 166  | 14.684  | 3.71 |
| chr3L | 3811167 | 3811521 | CG12006       | 35   | 14.4266 | 4.07 |
| chr3L | 3814112 | 3814732 | Scsalpha      | 225  | 15.3789 | 3.57 |
| chr3L | 3902117 | 3902854 | Ubi-p63E      | 12   | 22.6242 | 4.28 |
| chr3L | 3903235 | 3903836 | Sc2           | 107  | 25.1778 | 4.75 |
| chr3L | 3952243 | 3952905 | CG14984       | 5    | 10.0365 | 3.52 |
| chr3L | 4039731 | 4040904 | CG11593       | 180  | 29.9825 | 4.91 |
| chr3L | 4039731 | 4040904 | Rcd5          | 134  | 29.9825 | 4.91 |
| chr3L | 4070490 | 4071968 | wit           | 49   | 30.5158 | 4.31 |
| chr3L | 4102072 | 4102850 | CG14995       | 58   | 39.7681 | 5.41 |
| chr3L | 4103501 | 4104289 | Fit1          | 205  | 15.03   | 3.35 |
| chr3L | 4108157 | 4109950 | Ack           | 254  | 24.095  | 3.81 |

|       |         |         |           |      |         |       |
|-------|---------|---------|-----------|------|---------|-------|
| chr3L | 4133900 | 4134584 | ens       | 140  | 31.1894 | 5.00  |
| chr3L | 4138503 | 4140096 | Rop       | 257  | 47.7477 | 6.39  |
| chr3L | 4138503 | 4140096 | Ras64B    | 178  | 47.7477 | 6.39  |
| chr3L | 4148585 | 4149061 | CG1299    | 163  | 16.6234 | 4.14  |
| chr3L | 4170246 | 4170800 | Ero1L     | 79   | 30.4875 | 5.43  |
| chr3L | 4227064 | 4227616 | ImpL2     | 32   | 14.7874 | 3.96  |
| chr3L | 4227982 | 4229078 | ImpL2     | 1580 | 11.6551 | 3.21  |
| chr3L | 4240049 | 4240587 | CG14997   | 26   | 11.2415 | 3.39  |
| chr3L | 4240049 | 4240587 | CR45738   | 172  | 11.2415 | 3.39  |
| chr3L | 4253074 | 4254382 | ago       | 130  | 26.5345 | 4.45  |
| chr3L | 4282065 | 4282933 | CG11583   | 209  | 16.2051 | 3.93  |
| chr3L | 4291986 | 4292898 | CG15012   | 455  | 7.84582 | 3.00  |
| chr3L | 4291986 | 4292898 | Fdx2      | 220  | 7.84582 | 3.00  |
| chr3L | 4318773 | 4319366 | PMP34     | 245  | 19.3485 | 4.57  |
| chr3L | 4363463 | 4364919 | Cip4      | 60   | 36.4258 | 5.08  |
| chr3L | 4363463 | 4364919 | mRpS6     | 507  | 36.4258 | 5.08  |
| chr3L | 4403247 | 4403950 | Syx17     | 40   | 22.0322 | 4.38  |
| chr3L | 4406965 | 4407288 | DOR       | 44   | 10.4692 | 3.08  |
| chr3L | 4413849 | 4414957 | DOR       | 36   | 25.7973 | 4.63  |
| chr3L | 4625771 | 4626313 | Src64B    | 2    | 25.1121 | 4.36  |
| chr3L | 4626638 | 4627562 | HDAC1     | 511  | 185.334 | 14.92 |
| chr3L | 4626638 | 4627562 | CR45438   | 341  | 185.334 | 14.92 |
| chr3L | 4824410 | 4826427 | Dhc64C    | 982  | 89.9665 | 8.84  |
| chr3L | 4824410 | 4826427 | Aats-leu  | 1147 | 89.9665 | 8.84  |
| chr3L | 5134183 | 5134837 | CG4603    | 246  | 12.1407 | 3.08  |
| chr3L | 5152464 | 5153091 | Srp54k    | 81   | 17.3508 | 3.41  |
| chr3L | 5359007 | 5359481 | Klp64D    | 110  | 20.9647 | 3.68  |
| chr3L | 5360105 | 5361083 | Cyt-c1    | 153  | 46.134  | 6.34  |
| chr3L | 5365404 | 5367013 | Uev1A     | 216  | 25.6982 | 4.61  |
| chr3L | 5365404 | 5367013 | Membrin   | 677  | 25.6982 | 4.61  |
| chr3L | 5563342 | 5564199 | Sucb      | 183  | 16.725  | 3.65  |
| chr3L | 5563342 | 5564199 | Sras      | 101  | 16.725  | 3.65  |
| chr3L | 5577054 | 5577520 | Msr-110   | 51   | 12.2069 | 3.20  |
| chr3L | 5583075 | 5584539 | l(3)psg2  | 11   | 13.5778 | 3.39  |
| chr3L | 5751558 | 5752531 | DnaJ-1    | 115  | 18.0765 | 3.39  |
| chr3L | 5752903 | 5753635 | Usp47     | 96   | 34.3815 | 5.18  |
| chr3L | 5765010 | 5766363 | CR43603   | 348  | 46.0031 | 6.83  |
| chr3L | 5765010 | 5766363 | CG10576   | 107  | 46.0031 | 6.83  |
| chr3L | 5765010 | 5766363 | Txl       | 451  | 46.0031 | 6.83  |
| chr3L | 5768411 | 5771962 | Ppat-Dpck | 491  | 32.0617 | 4.64  |
| chr3L | 5768411 | 5771962 | scny      | 163  | 32.0617 | 4.64  |
| chr3L | 5779938 | 5780493 | Pmi       | 159  | 11.1593 | 3.10  |
| chr3L | 5779938 | 5780493 | PGRP-LD   | 54   | 11.1593 | 3.10  |
| chr3L | 5809835 | 5811662 | S6k       | 21   | 20.833  | 3.77  |
| chr3L | 5809835 | 5811662 | CG5537    | 20   | 20.833  | 3.77  |
| chr3L | 5902132 | 5902707 | QC        | 19   | 30.659  | 5.33  |
| chr3L | 5923533 | 5924228 | Vap-33B   | 37   | 22.3255 | 4.33  |
| chr3L | 5931822 | 5932900 | Rcc1      | 160  | 17.4043 | 3.73  |
| chr3L | 6094687 | 6095429 | CG10467   | 269  | 21.0657 | 4.37  |
| chr3L | 6094687 | 6095429 | loj       | 30   | 21.0657 | 4.37  |
| chr3L | 6192739 | 6194390 | CG13298   | 617  | 31.6553 | 5.45  |
| chr3L | 6192739 | 6194390 | Trn       | 51   | 31.6553 | 5.45  |
| chr3L | 6218608 | 6218944 | LanA      | 726  | 21.7452 | 5.15  |
| chr3L | 6256085 | 6256849 | Best2     | 27   | 16.2152 | 3.83  |
| chr3L | 6488040 | 6489071 | CG10147   | 255  | 18.3414 | 4.05  |
| chr3L | 6488040 | 6489071 | CG8270    | 1    | 18.3414 | 4.05  |

|       |         |         |         |      |         |      |
|-------|---------|---------|---------|------|---------|------|
| chr3L | 6494827 | 6496646 | CG10144 | 437  | 19.858  | 3.59 |
| chr3L | 6494827 | 6496646 | sfl     | 55   | 19.858  | 3.59 |
| chr3L | 6689008 | 6689335 | SP1173  | 3484 | 21.6959 | 4.27 |
| chr3L | 6742067 | 6744120 | dikar   | 102  | 30.0689 | 4.14 |
| chr3L | 6746867 | 6747469 | velo    | 40   | 13.3967 | 3.49 |
| chr3L | 6751874 | 6753533 | velo    | 475  | 28.6233 | 4.79 |
| chr3L | 6751874 | 6753533 | CG8549  | 160  | 28.6233 | 4.79 |
| chr3L | 6755633 | 6756616 | CG10103 | 166  | 15.5333 | 3.47 |
| chr3L | 6964326 | 6964963 | sgl     | 99   | 52.0155 | 6.05 |
| chr3L | 7094688 | 7095188 | form3   | 88   | 27.0049 | 5.03 |
| chr3L | 7124982 | 7125683 | msl-3   | 145  | 22.5335 | 4.48 |
| chr3L | 7133516 | 7134780 | melt    | 91   | 17.1671 | 3.56 |
| chr3L | 7189495 | 7190044 | Dscam2  | 279  | 12.3339 | 3.55 |
| chr3L | 7238571 | 7239046 | BHD     | 196  | 20.175  | 4.36 |
| chr3L | 7240746 | 7241460 | RpL18   | 72   | 23.5542 | 4.29 |
| chr3L | 7248737 | 7249463 | Cdc27   | 117  | 11.8019 | 3.28 |
| chr3L | 7249980 | 7250543 | MED4    | 223  | 29.085  | 5.04 |
| chr3L | 7328115 | 7329657 | CG8602  | 93   | 46.9675 | 6.27 |
| chr3L | 7328115 | 7329657 | mus312  | 382  | 46.9675 | 6.27 |
| chr3L | 7328115 | 7329657 | CG42307 | 382  | 46.9675 | 6.27 |
| chr3L | 7328115 | 7329657 | mus312  | 382  | 46.9675 | 6.27 |
| chr3L | 7328115 | 7329657 | CG42307 | 382  | 46.9675 | 6.27 |
| chr3L | 7328115 | 7329657 | mus312  | 382  | 46.9675 | 6.27 |
| chr3L | 7339403 | 7340320 | lark    | 209  | 15.6608 | 3.22 |
| chr3L | 7344663 | 7345368 | CG8596  | 74   | 50.3757 | 7.22 |
| chr3L | 7347494 | 7348728 | Srp19   | 414  | 39.7681 | 5.41 |
| chr3L | 7347494 | 7348728 | qm      | 136  | 39.7681 | 5.41 |
| chr3L | 7358800 | 7361550 | pst     | 471  | 106.387 | 8.28 |
| chr3L | 7358800 | 7361550 | Sec63   | 174  | 106.387 | 8.28 |
| chr3L | 7369762 | 7370967 | akirin  | 187  | 18.4168 | 3.51 |
| chr3L | 7435025 | 7435530 | Rac2    | 24   | 11.7751 | 3.27 |
| chr3L | 7510958 | 7511582 | CG7546  | 179  | 17.5225 | 3.55 |
| chr3L | 7653849 | 7654844 | CG7492  | 220  | 22.1249 | 4.58 |
| chr3L | 7719183 | 7719731 | CG12262 | 43   | 30.0537 | 4.67 |
| chr3L | 7809515 | 7810197 | CG32369 | 256  | 22.227  | 4.48 |
| chr3L | 7864012 | 7864444 | Pdp1    | 3124 | 13.9636 | 3.30 |
| chr3L | 7935588 | 7936822 | syd     | 182  | 11.8019 | 3.28 |
| chr3L | 7935588 | 7936822 | Srp9    | 434  | 11.8019 | 3.28 |
| chr3L | 7978252 | 7979436 | CG8038  | 455  | 27.9025 | 4.39 |
| chr3L | 7978252 | 7979436 | nmo     | 60   | 27.9025 | 4.39 |
| chr3L | 8115546 | 8116995 | Arp3    | 314  | 25.7144 | 4.28 |
| chr3L | 8115546 | 8116995 | msh     | 38   | 25.7144 | 4.28 |
| chr3L | 8127440 | 8128935 | CdsA    | 454  | 38.9555 | 5.40 |
| chr3L | 8127440 | 8128935 | Uba2    | 397  | 38.9555 | 5.40 |
| chr3L | 8127440 | 8128935 | CdsA    | 162  | 38.9555 | 5.40 |
| chr3L | 8177600 | 8178487 | Nmt     | 263  | 20.6883 | 4.74 |
| chr3L | 8185377 | 8187787 | ERR     | 320  | 35.1798 | 5.37 |
| chr3L | 8185377 | 8187787 | Atg18a  | 3    | 35.1798 | 5.37 |
| chr3L | 8191335 | 8191693 | MED24   | 256  | 9.72728 | 3.07 |
| chr3L | 8197454 | 8198573 | UbcE2M  | 3    | 12.3773 | 3.41 |
| chr3L | 8197454 | 8198573 | CG8005  | 346  | 12.3773 | 3.41 |
| chr3L | 8297124 | 8297672 | Rab19   | 76   | 13.2179 | 3.49 |
| chr3L | 8298932 | 8300522 | Arl5    | 149  | 18.2372 | 3.52 |
| chr3L | 8298932 | 8300522 | CG13671 | 373  | 18.2372 | 3.52 |
| chr3L | 8314897 | 8315582 | CG7185  | 204  | 64.0809 | 6.68 |
| chr3L | 8345812 | 8347121 | CG7182  | 376  | 46.3365 | 5.99 |

|       |         |         |                   |      |         |      |
|-------|---------|---------|-------------------|------|---------|------|
| chr3L | 8345812 | 8347121 | GAPcenA           | 198  | 46.3365 | 5.99 |
| chr3L | 8395890 | 8396689 | CG7120            | 81   | 13.8175 | 3.98 |
| chr3L | 8404745 | 8405897 | mkg-p             | 214  | 31.4096 | 5.47 |
| chr3L | 8404745 | 8405897 | CG33057           | 214  | 31.4096 | 5.47 |
| chr3L | 8404745 | 8405897 | mkg-p             | 214  | 31.4096 | 5.47 |
| chr3L | 8404745 | 8405897 | CG33057           | 214  | 31.4096 | 5.47 |
| chr3L | 8404745 | 8405897 | CG13667           | 390  | 31.4096 | 5.47 |
| chr3L | 8424797 | 8425836 | Cbl               | 111  | 24.3896 | 4.49 |
| chr3L | 8441794 | 8442540 | Unr               | 1    | 24.5309 | 4.46 |
| chr3L | 8449736 | 8450607 | Gug               | 88   | 39.4226 | 6.17 |
| chr3L | 8525126 | 8525791 | foi               | 72   | 22.7821 | 4.12 |
| chr3L | 8534823 | 8535529 | ergic53           | 125  | 38.3271 | 5.30 |
| chr3L | 8603687 | 8604272 | CG5989            | 168  | 28.4819 | 4.61 |
| chr3L | 8675452 | 8676308 | h                 | 78   | 22.517  | 4.21 |
| chr3L | 8693467 | 8694243 | CR44526           | 1215 | 10.9722 | 3.23 |
| chr3L | 8827398 | 8827757 | dally             | 35   | 13.5922 | 3.58 |
| chr3L | 8968423 | 8969129 | CG5026            | 61   | 16.8023 | 3.90 |
| chr3L | 8973875 | 8975561 | pix               | 169  | 45.3947 | 6.97 |
| chr3L | 8973875 | 8975561 | Srp68             | 449  | 45.3947 | 6.97 |
| chr3L | 8984972 | 8985712 | Galk              | 38   | 14.1464 | 3.30 |
| chr3L | 8996487 | 8998741 | smg               | 202  | 20.3097 | 3.80 |
| chr3L | 8996487 | 8998741 | CG5087            | 735  | 20.3097 | 3.80 |
| chr3L | 9072083 | 9072747 | CG4911            | 147  | 13.5578 | 3.13 |
| chr3L | 9335641 | 9336228 | PGRP-LA           | 147  | 18.2908 | 4.15 |
| chr3L | 9349464 | 9349866 | PGRP-LF           | 54   | 26.0427 | 4.37 |
| chr3L | 9357560 | 9359221 | UGP               | 402  | 12.8827 | 3.08 |
| chr3L | 9357560 | 9359221 | CG32039           | 465  | 12.8827 | 3.08 |
| chr3L | 9360204 | 9360827 | Pdxk              | 296  | 14.6662 | 3.36 |
| chr3L | 9366912 | 9368221 | Klp67A            | 493  | 30.7884 | 4.93 |
| chr3L | 9366912 | 9368221 | CG4452            | 163  | 30.7884 | 4.93 |
| chr3L | 9370463 | 9371065 | Fdx1              | 137  | 11.9836 | 3.28 |
| chr3L | 9401314 | 9402617 | eIF-4E            | 116  | 13.9288 | 3.13 |
| chr3L | 9409847 | 9411533 | CG4022            | 242  | 22.225  | 3.69 |
| chr3L | 9409847 | 9411533 | CG3689            | 37   | 22.225  | 3.69 |
| chr3L | 9426041 | 9427833 | CG3967            | 316  | 34.281  | 5.22 |
| chr3L | 9426041 | 9427833 | Shc               | 65   | 34.281  | 5.22 |
| chr3L | 9428940 | 9429842 | snoRNA:Psi28S-612 | 114  | 16.2152 | 3.83 |
| chr3L | 9428940 | 9429842 | RpS17             | 189  | 16.2152 | 3.83 |
| chr3L | 9430121 | 9431088 | MTF-1             | 169  | 18.642  | 3.95 |
| chr3L | 9441601 | 9442408 | Nf-YA             | 67   | 21.9923 | 4.61 |
| chr3L | 9441601 | 9442408 | Bet3              | 67   | 21.9923 | 4.61 |
| chr3L | 9446594 | 9447804 | CG3529            | 240  | 55.1234 | 6.25 |
| chr3L | 9451235 | 9452698 | CG3448            | 104  | 10.9657 | 3.14 |
| chr3L | 9451235 | 9452698 | ghi               | 407  | 10.9657 | 3.14 |
| chr3L | 9455426 | 9456981 | phol              | 411  | 34.1225 | 4.99 |
| chr3L | 9455426 | 9456981 | CG3552            | 447  | 34.1225 | 4.99 |
| chr3L | 9455426 | 9456981 | CR45873           | 468  | 34.1225 | 4.99 |
| chr3L | 9476582 | 9477998 | Uch-L5            | 73   | 32.9787 | 5.07 |
| chr3L | 9476582 | 9477998 | Jarid2            | 1    | 32.9787 | 5.07 |
| chr3L | 9505039 | 9505398 | path              | 69   | 20.6778 | 4.47 |
| chr3L | 9508971 | 9509950 | CG3408            | 277  | 24.6739 | 4.44 |
| chr3L | 9546816 | 9547509 | CG42673           | 180  | 21.3521 | 3.74 |
| chr3L | 9629956 | 9630650 | CG8336            | 115  | 37.8858 | 5.51 |
| chr3L | 9643664 | 9644144 | CNMaR             | 174  | 12.6775 | 3.42 |
| chr3L | 9694184 | 9694674 | CG6767            | 61   | 24.9643 | 4.39 |
| chr3L | 9698098 | 9698978 | Ubc4              | 171  | 18.0941 | 4.16 |



|       |          |          |           |      |         |      |
|-------|----------|----------|-----------|------|---------|------|
| chr3L | 9704230  | 9705174  | CG16711   | 245  | 29.752  | 4.98 |
| chr3L | 9713301  | 9713873  | SH3PX1    | 139  | 27.4635 | 4.46 |
| chr3L | 9714165  | 9714965  | vsg       | 44   | 16.989  | 3.57 |
| chr3L | 9723335  | 9723894  | defl      | 70   | 14.9886 | 3.78 |
| chr3L | 9726905  | 9727236  | Naa60     | 195  | 15.9487 | 4.05 |
| chr3L | 9729927  | 9730787  | ATPsynB   | 132  | 25.1778 | 4.75 |
| chr3L | 9853949  | 9855407  | RasGAP1   | 548  | 23.1047 | 4.17 |
| chr3L | 9863841  | 9865346  | iPLA2-VIA | 412  | 19.6858 | 4.10 |
| chr3L | 9863841  | 9865346  | CG8108    | 123  | 19.6858 | 4.10 |
| chr3L | 9888113  | 9889575  | Taf2      | 82   | 14.85   | 3.60 |
| chr3L | 9888113  | 9889575  | CalpB     | 160  | 14.85   | 3.60 |
| chr3L | 9898089  | 9899696  | CG6707    | 41   | 18.6029 | 4.10 |
| chr3L | 9898089  | 9899696  | nudE      | 225  | 18.6029 | 4.10 |
| chr3L | 9968016  | 9968700  | CG6685    | 39   | 17.7005 | 3.54 |
| chr3L | 9968016  | 9968700  | Dronc     | 200  | 17.7005 | 3.54 |
| chr3L | 9971718  | 9973082  | CG6674    | 310  | 17.4681 | 3.83 |
| chr3L | 9971718  | 9973082  | vnc       | 53   | 17.4681 | 3.83 |
| chr3L | 9971718  | 9973082  | CG42455   | 53   | 17.4681 | 3.83 |
| chr3L | 9971718  | 9973082  | vnc       | 53   | 17.4681 | 3.83 |
| chr3L | 9971718  | 9973082  | CG42455   | 391  | 17.4681 | 3.83 |
| chr3L | 9971718  | 9973082  | vnc       | 391  | 17.4681 | 3.83 |
| chr3L | 10224780 | 10225338 | scramb1   | 119  | 15.0256 | 3.59 |
| chr3L | 10515799 | 10516257 | A2bp1     | 46   | 25.9862 | 5.10 |
| chr3L | 10637334 | 10638677 | E(z)      | 175  | 13.4156 | 3.59 |
| chr3L | 10637334 | 10638677 | CG8009    | 441  | 13.4156 | 3.59 |
| chr3L | 10660468 | 10661109 | CG32066   | 113  | 16.7173 | 3.26 |
| chr3L | 10661504 | 10661876 | CG8003    | 139  | 13.7753 | 4.04 |
| chr3L | 10664539 | 10666655 | simj      | 20   | 34.1839 | 5.26 |
| chr3L | 10683068 | 10683903 | CG11811   | 7788 | 14.1207 | 3.54 |
| chr3L | 10775675 | 10777306 | CG43245   | 4831 | 10.8635 | 3.12 |
| chr3L | 10857720 | 10858173 | tna       | 41   | 22.3363 | 4.05 |
| chr3L | 10867780 | 10868298 | tna       | 1753 | 23.5552 | 4.50 |
| chr3L | 11008873 | 11009783 | klu       | 39   | 21.8736 | 4.35 |
| chr3L | 11010283 | 11011148 | klu       | 1535 | 8.72283 | 3.01 |
| chr3L | 11070314 | 11071177 | Mocs1     | 95   | 55.2595 | 7.26 |
| chr3L | 11073845 | 11074437 | I(3)01239 | 194  | 18.3864 | 3.86 |
| chr3L | 11113254 | 11114007 | Sod       | 226  | 27.1138 | 4.99 |
| chr3L | 11120013 | 11121307 | FoxK      | 59   | 46.1145 | 6.26 |
| chr3L | 11120013 | 11121307 | mRpL2     | 122  | 46.1145 | 6.26 |
| chr3L | 11122537 | 11124099 | Ufd1-like | 121  | 17.66   | 4.07 |
| chr3L | 11122537 | 11124099 | NaPi-III  | 10   | 17.66   | 4.07 |
| chr3L | 11135873 | 11136427 | CG32082   | 69   | 23.8306 | 5.40 |
| chr3L | 11169142 | 11170377 | wls       | 534  | 14.2378 | 3.18 |
| chr3L | 11169142 | 11170377 | CG7616    | 86   | 14.2378 | 3.18 |
| chr3L | 11205751 | 11206162 | Plod      | 7    | 30.4405 | 5.81 |
| chr3L | 11209867 | 11211269 | Ube3a     | 395  | 23.8415 | 4.45 |
| chr3L | 11209867 | 11211269 | CG7600    | 193  | 23.8415 | 4.45 |
| chr3L | 11252109 | 11252947 | scyl      | 65   | 40.8563 | 5.75 |
| chr3L | 11431227 | 11431607 | CG6149    | 4104 | 14.1387 | 3.93 |
| chr3L | 11487390 | 11488048 | chrb      | 43   | 24.5103 | 4.05 |
| chr3L | 11586703 | 11588168 | rt        | 862  | 14.6738 | 3.61 |
| chr3L | 11601199 | 11601688 | CG7368    | 105  | 10.664  | 3.46 |
| chr3L | 11627891 | 11628509 | CG18815   | 58   | 19.8017 | 4.23 |
| chr3L | 11648026 | 11649026 | RIOK1     | 122  | 20.6127 | 4.12 |
| chr3L | 11648026 | 11649026 | CG7339    | 403  | 20.6127 | 4.12 |
| chr3L | 11681783 | 11682494 | TfIIalpha | 5    | 24.5856 | 4.95 |

|       |          |          |                    |      |         |      |
|-------|----------|----------|--------------------|------|---------|------|
| chr3L | 11683670 | 11684751 | Sugb               | 270  | 29.752  | 4.98 |
| chr3L | 11690966 | 11691277 | Pallidin           | 232  | 12.0224 | 3.53 |
| chr3L | 11707917 | 11708628 | CG11658            | 155  | 47.972  | 5.99 |
| chr3L | 11714980 | 11715351 | CG14132            | 138  | 21.0828 | 4.75 |
| chr3L | 11822709 | 11823465 | RpL10Ab            | 30   | 20.1634 | 4.04 |
| chr3L | 11822709 | 11823465 | snoRNA:Psi18S-920  | 103  | 20.1634 | 4.04 |
| chr3L | 12002451 | 12003174 | Pop2               | 173  | 25.4357 | 4.07 |
| chr3L | 12002451 | 12003174 | CG6928             | 412  | 25.4357 | 4.07 |
| chr3L | 12118208 | 12118814 | ssp                | 173  | 24.5856 | 4.95 |
| chr3L | 12124067 | 12125341 | yps                | 187  | 23.2622 | 4.07 |
| chr3L | 12137904 | 12139335 | ND-SGDH            | 151  | 21.2264 | 4.18 |
| chr3L | 12137904 | 12139335 | RhoGAP68F          | 545  | 21.2264 | 4.18 |
| chr3L | 12145688 | 12146101 | CG5642             | 250  | 11.2866 | 3.21 |
| chr3L | 12270844 | 12271396 | Pbgs               | 119  | 15.8889 | 3.97 |
| chr3L | 12276899 | 12278211 | CG4300             | 485  | 31.1502 | 5.56 |
| chr3L | 12276899 | 12278211 | CG10426            | 82   | 31.1502 | 5.56 |
| chr3L | 12408318 | 12408959 | CG32103            | 4    | 22.6239 | 4.14 |
| chr3L | 12414145 | 12414974 | CG32103            | 23   | 14.4704 | 3.62 |
| chr3L | 12416767 | 12417643 | ArfGAP1            | 253  | 16.8406 | 3.67 |
| chr3L | 12467979 | 12468405 | eyg                | 193  | 14.8187 | 3.79 |
| chr3L | 12471735 | 12472161 | CG10616            | 210  | 17.0699 | 4.00 |
| chr3L | 12489727 | 12491229 | CG10660            | 322  | 11.2614 | 3.21 |
| chr3L | 12489727 | 12491229 | CR45681            | 104  | 11.2614 | 3.21 |
| chr3L | 12489727 | 12491229 | CG10660            | 279  | 11.2614 | 3.21 |
| chr3L | 12500761 | 12501285 | CG10638            | 309  | 12.9163 | 3.48 |
| chr3L | 12514479 | 12516189 | sti                | 379  | 22.3255 | 4.33 |
| chr3L | 12514479 | 12516189 | CR45168            | 185  | 22.3255 | 4.33 |
| chr3L | 12514479 | 12516189 | tral               | 136  | 22.3255 | 4.33 |
| chr3L | 12526113 | 12526827 | eIF-2beta          | 172  | 56.7985 | 6.20 |
| chr3L | 12533041 | 12534847 | Tsf2               | 164  | 15.4794 | 3.68 |
| chr3L | 12533041 | 12534847 | CG34242            | 435  | 15.4794 | 3.68 |
| chr3L | 12533041 | 12534847 | CG10688            | 1029 | 15.4794 | 3.68 |
| chr3L | 12609289 | 12609953 | caup               | 148  | 23.1868 | 4.55 |
| chr3L | 12692813 | 12693780 | mirr               | 432  | 26.1078 | 4.53 |
| chr3L | 12734315 | 12735168 | SmD1               | 75   | 21.8543 | 4.10 |
| chr3L | 12734315 | 12735168 | Ptp69D             | 408  | 21.8543 | 4.10 |
| chr3L | 12750530 | 12750856 | CG10984            | 190  | 11.0265 | 3.08 |
| chr3L | 12804395 | 12805166 | Atg1               | 128  | 19.7277 | 3.96 |
| chr3L | 12805980 | 12806586 | Sap130             | 55   | 18.8931 | 3.82 |
| chr3L | 12814414 | 12814841 | CG42588            | 432  | 13.1898 | 3.51 |
| chr3L | 12849501 | 12850494 | CG10948            | 129  | 18.1467 | 3.77 |
| chr3L | 12849501 | 12850494 | Wbp2               | 82   | 18.1467 | 3.77 |
| chr3L | 13015966 | 13016580 | CG11267            | 146  | 17.72   | 3.93 |
| chr3L | 13021643 | 13022815 | AdenoK             | 129  | 43.4375 | 5.68 |
| chr3L | 13023205 | 13023883 | RpS12              | 24   | 23.603  | 4.46 |
| chr3L | 13023205 | 13023883 | snoRNA:Me28S-A774t | 204  | 23.603  | 4.46 |
| chr3L | 13041572 | 13042368 | RpS4               | 84   | 49.0167 | 5.81 |
| chr3L | 13044283 | 13045415 | Syx13              | 1    | 28.0815 | 4.70 |
| chr3L | 13114082 | 13114523 | trn                | 64   | 19.6858 | 4.10 |
| chr3L | 13442435 | 13443528 | cmb                | 259  | 22.8516 | 5.25 |
| chr3L | 13477152 | 13478546 | stv                | 83   | 24.1656 | 4.21 |
| chr3L | 13485775 | 13486363 | Abp1               | 116  | 28.7239 | 5.04 |
| chr3L | 13494531 | 13495005 | Tgi                | 785  | 25.6156 | 4.89 |
| chr3L | 13497557 | 13498452 | Tgi                | 2276 | 19.2127 | 4.01 |
| chr3L | 13512713 | 13513970 | Vps36              | 52   | 13.94   | 3.38 |
| chr3L | 13512713 | 13513970 | Liprin-beta        | 193  | 13.94   | 3.38 |

|       |          |          |            |       |         |      |
|-------|----------|----------|------------|-------|---------|------|
| chr3L | 13928573 | 13930216 | CG8833     | 602   | 34.0434 | 6.07 |
| chr3L | 13928573 | 13930216 | DCTN1-p150 | 216   | 34.0434 | 6.07 |
| chr3L | 13938969 | 13939722 | CG32137    | 54    | 15.3605 | 4.10 |
| chr3L | 13964283 | 13964842 | Meics      | 43    | 13.0305 | 3.60 |
| chr3L | 13965126 | 13965723 | ssp2       | 276   | 17.8922 | 3.61 |
| chr3L | 13965126 | 13965723 | Nxf3       | 276   | 17.8922 | 3.61 |
| chr3L | 14002025 | 14003273 | upSET      | 82    | 26.492  | 4.18 |
| chr3L | 14003573 | 14006188 | upSET      | 1925  | 17.604  | 3.56 |
| chr3L | 14028264 | 14029284 | Ptip       | 455   | 38.2857 | 5.83 |
| chr3L | 14031047 | 14031826 | endos      | 265   | 15.9328 | 3.63 |
| chr3L | 14031047 | 14031826 | CG6650     | 183   | 15.9328 | 3.63 |
| chr3L | 14031047 | 14031826 | endos      | 74    | 15.9328 | 3.63 |
| chr3L | 14036892 | 14038559 | Hsc70Cb    | 91    | 17.5907 | 3.29 |
| chr3L | 14050428 | 14051787 | CG6833     | 289   | 27.2872 | 4.67 |
| chr3L | 14052431 | 14053580 | CG13484    | 212   | 42.6974 | 5.62 |
| chr3L | 14052431 | 14053580 | CG32138    | 77    | 42.6974 | 5.62 |
| chr3L | 14071695 | 14072558 | Pex1       | 47    | 16.8125 | 3.58 |
| chr3L | 14190246 | 14191648 | nuf        | 21    | 25.3185 | 4.50 |
| chr3L | 14274073 | 14274657 | fz         | 41    | 18.8362 | 4.26 |
| chr3L | 14427161 | 14427638 | bbg        | 34    | 12.261  | 3.13 |
| chr3L | 14537461 | 14538491 | Mpcp       | 16    | 27.5782 | 4.83 |
| chr3L | 14552726 | 14552996 | Gbs-70E    | 1864  | 10.6523 | 3.40 |
| chr3L | 14622728 | 14623435 | CG9628     | 128   | 11.5271 | 3.22 |
| chr3L | 14624394 | 14625259 | CG9628     | 1751  | 12.3257 | 3.35 |
| chr3L | 14706514 | 14707012 | ome        | 58    | 46.9461 | 6.33 |
| chr3L | 14785435 | 14787467 | bmm        | 107   | 22.324  | 3.85 |
| chr3L | 14785435 | 14787467 | Tdrd3      | 485   | 22.324  | 3.85 |
| chr3L | 14789835 | 14791080 | CG9425     | 297   | 13.7431 | 3.13 |
| chr3L | 14801566 | 14802314 | NHP2       | 193   | 26.8929 | 5.14 |
| chr3L | 14804644 | 14805627 | CG17839    | 249   | 38.9571 | 6.02 |
| chr3L | 14819628 | 14819959 | CG17839    | 14615 | 11.9299 | 3.74 |
| chr3L | 15093908 | 15095553 | sstn       | 571   | 12.9588 | 3.03 |
| chr3L | 15093908 | 15095553 | Plp        | 566   | 12.9588 | 3.03 |
| chr3L | 15093908 | 15095553 | Aats-gly   | 149   | 12.9588 | 3.03 |
| chr3L | 15141259 | 15142753 | CR45396    | 378   | 46.2899 | 6.04 |
| chr3L | 15141259 | 15142753 | Pdi        | 84    | 46.2899 | 6.04 |
| chr3L | 15143546 | 15144853 | CR45397    | 705   | 51.0415 | 6.94 |
| chr3L | 15143546 | 15144853 | CG32147    | 446   | 51.0415 | 6.94 |
| chr3L | 15143546 | 15144853 | Pex3       | 151   | 51.0415 | 6.94 |
| chr3L | 15162971 | 15163704 | CG7011     | 181   | 22.6738 | 4.45 |
| chr3L | 15498844 | 15499597 | CG7275     | 410   | 9.6395  | 3.14 |
| chr3L | 15500794 | 15501696 | CG7272     | 35    | 23.1053 | 3.65 |
| chr3L | 15554074 | 15554591 | AGO2       | 254   | 23.1356 | 3.72 |
| chr3L | 15579874 | 15581306 | mrn        | 62    | 15.5555 | 3.40 |
| chr3L | 15579874 | 15581306 | CG12301    | 324   | 15.5555 | 3.40 |
| chr3L | 15588744 | 15589441 | RhoGAP71E  | 115   | 43.8895 | 5.98 |
| chr3L | 15609891 | 15610339 | CG7650     | 264   | 13.4156 | 3.59 |
| chr3L | 15825428 | 15826489 | DCP2       | 136   | 14.5117 | 3.29 |
| chr3L | 15826858 | 15827259 | dbo        | 132   | 22.3255 | 4.33 |
| chr3L | 15832172 | 15832792 | CG12713    | 133   | 16.1079 | 3.62 |
| chr3L | 15835154 | 15835451 | CG18081    | 51    | 13.1236 | 3.93 |
| chr3L | 15956555 | 15957215 | elgi       | 142   | 27.6085 | 4.43 |
| chr3L | 15967389 | 15968700 | l(3)72Ab   | 456   | 22.8075 | 4.37 |
| chr3L | 15967389 | 15968700 | CG10516    | 125   | 22.8075 | 4.37 |
| chr3L | 15976900 | 15977444 | CG17029    | 96    | 12.5105 | 3.54 |
| chr3L | 15982252 | 15983510 | brm        | 78    | 22.7768 | 4.26 |

|       |          |          |           |      |         |      |
|-------|----------|----------|-----------|------|---------|------|
| chr3L | 15982252 | 15983510 | Arl1      | 187  | 22.7768 | 4.26 |
| chr3L | 15988145 | 15988841 | Hip14     | 228  | 20.3801 | 4.40 |
| chr3L | 16001039 | 16002316 | CG5830    | 3442 | 9.98231 | 3.01 |
| chr3L | 16011267 | 16011937 | mib1      | 217  | 40.15   | 5.26 |
| chr3L | 16023329 | 16023630 | Notum     | 24   | 15.3316 | 3.75 |
| chr3L | 16027053 | 16027642 | mir-4941  | 3713 | 11.7823 | 3.37 |
| chr3L | 16045958 | 16047339 | Diap1     | 46   | 20.6154 | 4.22 |
| chr3L | 16049766 | 16051134 | Diap1     | 155  | 26.5363 | 4.88 |
| chr3L | 16087035 | 16087619 | Tasp1     | 144  | 31.1502 | 4.83 |
| chr3L | 16090350 | 16091054 | CG5235    | 258  | 14.113  | 3.45 |
| chr3L | 16090350 | 16091054 | CIC-c     | 195  | 14.113  | 3.45 |
| chr3L | 16113141 | 16114382 | Taf4      | 206  | 48.0787 | 5.90 |
| chr3L | 16129535 | 16130076 | SsRbeta   | 98   | 32.9295 | 5.48 |
| chr3L | 16228146 | 16228823 | l(3)72Dn  | 270  | 21.067  | 4.61 |
| chr3L | 16231538 | 16232605 | PDCD-5    | 65   | 21.8502 | 4.40 |
| chr3L | 16231538 | 16232605 | MED10     | 20   | 21.8502 | 4.40 |
| chr3L | 16377787 | 16378706 | roq       | 384  | 19.5296 | 4.12 |
| chr3L | 16385351 | 16385977 | CG4729    | 128  | 20.9293 | 4.08 |
| chr3L | 16408631 | 16409552 | fax       | 718  | 14.9922 | 3.45 |
| chr3L | 16409939 | 16410700 | fax       | 1247 | 10.1972 | 3.14 |
| chr3L | 16410984 | 16411938 | fax       | 19   | 14.5117 | 3.29 |
| chr3L | 16418825 | 16419380 | Aats-tyr  | 99   | 17.5769 | 3.71 |
| chr3L | 16483407 | 16483821 | aos       | 40   | 16.3829 | 3.81 |
| chr3L | 16572116 | 16572553 | Mipp1     | 16   | 14.8323 | 3.51 |
| chr3L | 16582978 | 16583901 | Rpn12     | 209  | 24.1656 | 4.21 |
| chr3L | 16584214 | 16584864 | UQCR-C2   | 278  | 21.8012 | 4.40 |
| chr3L | 16588099 | 16589187 | l(3)73Ah  | 153  | 13.3304 | 3.03 |
| chr3L | 16590766 | 16591169 | tra       | 13   | 10.2836 | 3.08 |
| chr3L | 16611560 | 16612876 | Su(P)     | 218  | 23.8086 | 4.73 |
| chr3L | 16611560 | 16612876 | CG4101    | 504  | 23.8086 | 4.73 |
| chr3L | 16611560 | 16612876 | CR45865   | 846  | 23.8086 | 4.73 |
| chr3L | 16660052 | 16661785 | Baldspot  | 70   | 30.0491 | 4.25 |
| chr3L | 16713512 | 16714429 | Dab       | 531  | 16.4711 | 3.93 |
| chr3L | 16765653 | 16766275 | Nrt       | 34   | 17.8061 | 3.80 |
| chr3L | 16780049 | 16780848 | CG9705    | 114  | 25.9862 | 5.10 |
| chr3L | 16786640 | 16787114 | Int6      | 107  | 17.191  | 3.36 |
| chr3L | 16808173 | 16809062 | nudC      | 142  | 19.402  | 4.00 |
| chr3L | 16845343 | 16845949 | CG9715    | 264  | 32.8528 | 5.54 |
| chr3L | 16890925 | 16891463 | Lmpt      | 48   | 19.27   | 4.07 |
| chr3L | 16986459 | 16987008 | Exn       | 18   | 21.7548 | 4.63 |
| chr3L | 17010030 | 17010575 | CG3764    | 2283 | 14.113  | 3.45 |
| chr3L | 17010980 | 17012736 | CG3764    | 82   | 28.946  | 4.96 |
| chr3L | 17015543 | 17016130 | CG6664    | 131  | 32.4667 | 5.27 |
| chr3L | 17016513 | 17016955 | CG7728    | 170  | 26.201  | 4.10 |
| chr3L | 17035661 | 17036002 | beg       | 146  | 10.1684 | 3.01 |
| chr3L | 17042180 | 17043089 | scaf6     | 90   | 12.3631 | 3.51 |
| chr3L | 17042180 | 17043089 | Papst2    | 312  | 12.3631 | 3.51 |
| chr3L | 17051111 | 17051957 | rogdi     | 95   | 15.2459 | 3.28 |
| chr3L | 17474881 | 17476663 | UQCR-Q    | 160  | 32.2254 | 5.49 |
| chr3L | 17474881 | 17476663 | CG34250   | 1013 | 32.2254 | 5.49 |
| chr3L | 17513433 | 17514741 | U4-U6-60K | 255  | 17.2105 | 3.73 |
| chr3L | 17513433 | 17514741 | CG7564    | 640  | 17.2105 | 3.73 |
| chr3L | 17532810 | 17534112 | Nedd4     | 4    | 19.3273 | 3.61 |
| chr3L | 17557062 | 17557865 | CycT      | 403  | 22.4593 | 3.90 |
| chr3L | 17621120 | 17622224 | Vps60     | 259  | 25.8948 | 4.39 |
| chr3L | 17621120 | 17622224 | CG7510    | 61   | 25.8948 | 4.39 |

|       |          |          |            |       |         |      |
|-------|----------|----------|------------|-------|---------|------|
| chr3L | 17644073 | 17645129 | Pep        | 577   | 39.8758 | 5.84 |
| chr3L | 17653138 | 17654400 | Krn        | 112   | 24.5103 | 4.05 |
| chr3L | 17653138 | 17654400 | Ndfip      | 112   | 24.5103 | 4.05 |
| chr3L | 17667854 | 17669357 | snmRNA:641 | 398   | 20.392  | 3.90 |
| chr3L | 17667854 | 17669357 | Crtc       | 106   | 20.392  | 3.90 |
| chr3L | 17841148 | 17841662 | CG5577     | 47    | 14.6738 | 3.61 |
| chr3L | 17845808 | 17846658 | MED19      | 146   | 55.383  | 5.97 |
| chr3L | 17846954 | 17847739 | CG7430     | 161   | 27.9181 | 5.01 |
| chr3L | 17849672 | 17850292 | CG7441     | 43    | 11.1149 | 3.36 |
| chr3L | 17895565 | 17896008 | Tsp74F     | 61    | 13.933  | 3.46 |
| chr3L | 17907520 | 17908645 | Prestin    | 47    | 31.9551 | 5.13 |
| chr3L | 17907520 | 17908645 | CG14353    | 377   | 31.9551 | 5.13 |
| chr3L | 17961423 | 17961952 | Eip75B     | 163   | 26.3411 | 4.33 |
| chr3L | 18105527 | 18107147 | CG13698    | 56    | 70.1723 | 7.35 |
| chr3L | 18105527 | 18107147 | mRpS26     | 485   | 70.1723 | 7.35 |
| chr3L | 18139091 | 18139952 | geko       | 39    | 10.2553 | 3.47 |
| chr3L | 18185430 | 18186303 | hid        | 29    | 21.9846 | 3.87 |
| chr3L | 18621079 | 18622203 | not        | 195   | 20.2246 | 3.91 |
| chr3L | 18625867 | 18626951 | MYPT-75D   | 54    | 22.372  | 4.83 |
| chr3L | 18672229 | 18673409 | Capr       | 459   | 48.5993 | 6.27 |
| chr3L | 18800010 | 18801671 | ftz-f1     | 28    | 16.827  | 3.37 |
| chr3L | 18800010 | 18801671 | CR45939    | 25    | 16.827  | 3.37 |
| chr3L | 18822507 | 18823029 | Cat        | 147   | 24.478  | 4.17 |
| chr3L | 18865883 | 18866690 | CR45912    | 314   | 14.113  | 3.45 |
| chr3L | 18865883 | 18866690 | CG14074    | 197   | 14.113  | 3.45 |
| chr3L | 18890112 | 18891341 | CG3961     | 73    | 16.8917 | 3.77 |
| chr3L | 18897933 | 18898438 | CG3902     | 103   | 15.2023 | 3.58 |
| chr3L | 18898725 | 18899790 | RpL26      | 105   | 16.7783 | 4.24 |
| chr3L | 18904205 | 18904859 | CSN1b      | 281   | 15.3824 | 4.04 |
| chr3L | 18905387 | 18905924 | CG6841     | 173   | 31.4721 | 5.35 |
| chr3L | 18995155 | 18995935 | CG18135    | 44    | 13.2295 | 3.66 |
| chr3L | 19015854 | 19016544 | CG18136    | 13088 | 14.4751 | 3.52 |
| chr3L | 19044993 | 19045623 | nkd        | 50    | 22.4983 | 4.03 |
| chr3L | 19062051 | 19063714 | CG3797     | 384   | 18.3564 | 3.68 |
| chr3L | 19062051 | 19063714 | CG6812     | 36    | 18.3564 | 3.68 |
| chr3L | 19086033 | 19086571 | Mkp3       | 41    | 17.5402 | 3.63 |
| chr3L | 19170049 | 19170770 | fz2        | 81    | 15.733  | 3.55 |
| chr3L | 19260108 | 19260770 | nes        | 233   | 27.5782 | 4.83 |
| chr3L | 19261228 | 19262006 | Bet1       | 224   | 16.6352 | 3.91 |
| chr3L | 19263585 | 19264810 | CG42374    | 137   | 24.0358 | 4.38 |
| chr3L | 19263585 | 19264810 | CG9666     | 137   | 24.0358 | 4.38 |
| chr3L | 19263585 | 19264810 | Max        | 282   | 24.0358 | 4.38 |
| chr3L | 19263585 | 19264810 | CG9666     | 501   | 24.0358 | 4.38 |
| chr3L | 19263585 | 19264810 | CG42374    | 501   | 24.0358 | 4.38 |
| chr3L | 19294281 | 19295218 | fal        | 64    | 34.2199 | 5.79 |
| chr3L | 19294281 | 19295218 | CR46048    | 368   | 34.2199 | 5.79 |
| chr3L | 19551823 | 19552855 | Ltn1       | 83    | 44.0519 | 5.82 |
| chr3L | 19551823 | 19552855 | CG9300     | 212   | 44.0519 | 5.82 |
| chr3L | 19562203 | 19563533 | CR45916    | 75    | 13.6828 | 3.18 |
| chr3L | 19585413 | 19586546 | CG9231     | 296   | 14.499  | 3.62 |
| chr3L | 19585413 | 19586546 | CG9330     | 47    | 14.499  | 3.62 |
| chr3L | 19589931 | 19590764 | CG14100    | 80    | 16.1486 | 3.72 |
| chr3L | 19598342 | 19599501 | ash1       | 209   | 18.2322 | 4.03 |
| chr3L | 19598342 | 19599501 | Taf6       | 541   | 18.2322 | 4.03 |
| chr3L | 19618033 | 19618557 | I(3)76BDm  | 197   | 29.3222 | 4.47 |
| chr3L | 19635252 | 19636010 | wnd        | 49    | 37.8033 | 4.94 |

|       |          |          |          |     |         |      |
|-------|----------|----------|----------|-----|---------|------|
| chr3L | 19686937 | 19687677 | CG8765   | 20  | 19.0643 | 4.19 |
| chr3L | 19686937 | 19687677 | Gbeta76C | 303 | 19.0643 | 4.19 |
| chr3L | 19793036 | 19794464 | Gyc76C   | 97  | 18.4168 | 3.51 |
| chr3L | 19793036 | 19794464 | CG42637  | 97  | 18.4168 | 3.51 |
| chr3L | 19793036 | 19794464 | SREBP    | 462 | 18.4168 | 3.51 |
| chr3L | 19833367 | 19835109 | trc      | 78  | 34.6369 | 5.46 |
| chr3L | 19833367 | 19835109 | CG32221  | 443 | 34.6369 | 5.46 |
| chr3L | 19870785 | 19871953 | Rab8     | 189 | 21.4687 | 3.91 |
| chr3L | 19870785 | 19871953 | Usp32    | 129 | 21.4687 | 3.91 |
| chr3L | 19908592 | 19910910 | CR43889  | 581 | 17.3508 | 3.41 |
| chr3L | 19908592 | 19910910 | Su(Tpl)  | 535 | 17.3508 | 3.41 |
| chr3L | 19908592 | 19910910 | Mi-2     | 270 | 17.3508 | 3.41 |
| chr3L | 19908592 | 19910910 | Prp3     | 354 | 17.3508 | 3.41 |
| chr3L | 19914853 | 19915766 | Rpn1     | 265 | 20.5222 | 4.06 |
| chr3L | 19922785 | 19924093 | Su(z)12  | 328 | 22.2457 | 4.22 |
| chr3L | 19922785 | 19924093 | CG7770   | 536 | 22.2457 | 4.22 |
| chr3L | 19924841 | 19925276 | Grasp65  | 135 | 39.2229 | 6.21 |
| chr3L | 19939094 | 19939372 | Ac76E    | 81  | 13.5778 | 3.39 |
| chr3L | 20001079 | 20001644 | Tom20    | 239 | 23.1394 | 4.66 |
| chr3L | 20198030 | 20198434 | CG42674  | 111 | 26.8798 | 4.82 |
| chr3L | 20242484 | 20243111 | Clc      | 267 | 18.3175 | 3.76 |
| chr3L | 20301759 | 20302872 | Pex23    | 471 | 42.6024 | 5.66 |
| chr3L | 20301759 | 20302872 | CG6597   | 182 | 42.6024 | 5.66 |
| chr3L | 20316870 | 20317581 | Spn77Ba  | 92  | 16.4431 | 3.59 |
| chr3L | 20316870 | 20317581 | CR43875  | 2   | 16.4431 | 3.59 |
| chr3L | 20347111 | 20349380 | Rbbp5    | 543 | 30.2321 | 5.13 |
| chr3L | 20347111 | 20349380 | eRF1     | 131 | 30.2321 | 5.13 |
| chr3L | 20353692 | 20354359 | CG5618   | 258 | 14.3736 | 3.80 |
| chr3L | 20367023 | 20367616 | in       | 69  | 10.2525 | 3.20 |
| chr3L | 20375392 | 20376698 | Ide      | 540 | 31.1484 | 5.11 |
| chr3L | 20375392 | 20376698 | RhoBTB   | 195 | 31.1484 | 5.11 |
| chr3L | 20401325 | 20401710 | trbl     | 89  | 14.0011 | 3.24 |
| chr3L | 20427224 | 20427712 | CG5274   | 53  | 13.6339 | 3.69 |
| chr3L | 20432127 | 20432951 | Las      | 422 | 14.8323 | 3.51 |
| chr3L | 20432127 | 20432951 | Psn      | 145 | 14.8323 | 3.51 |
| chr3L | 20452363 | 20453531 | CG5199   | 440 | 11.7823 | 3.37 |
| chr3L | 20452363 | 20453531 | Uhg8     | 12  | 11.7823 | 3.37 |
| chr3L | 20472647 | 20473487 | CG32428  | 109 | 15.2976 | 3.08 |
| chr3L | 20473766 | 20475438 | CG5969   | 197 | 17.5561 | 3.94 |
| chr3L | 20473766 | 20475438 | isoQC    | 486 | 17.5561 | 3.94 |
| chr3L | 20525584 | 20526889 | CG4825   | 178 | 30.571  | 5.38 |
| chr3L | 20525584 | 20526889 | CG4858   | 579 | 30.571  | 5.38 |
| chr3L | 20770885 | 20772018 | CG4042   | 144 | 44.9986 | 5.74 |
| chr3L | 20770885 | 20772018 | Pitslre  | 124 | 44.9986 | 5.74 |
| chr3L | 20777844 | 20778509 | Pex16    | 137 | 14.1132 | 3.80 |
| chr3L | 20785132 | 20786360 | CG11399  | 149 | 33.2559 | 4.76 |
| chr3L | 20787761 | 20788267 | CG11396  | 37  | 14.3011 | 3.90 |
| chr3L | 20808825 | 20810191 | CG3634   | 117 | 23.3237 | 4.51 |
| chr3L | 20808825 | 20810191 | HIPP1    | 538 | 23.3237 | 4.51 |
| chr3L | 20841034 | 20841713 | CSN3     | 85  | 21.0719 | 4.21 |
| chr3L | 20949029 | 20950115 | fng      | 40  | 21.1032 | 4.37 |
| chr3L | 21025702 | 21027516 | skd      | 254 | 15.8437 | 3.85 |
| chr3L | 21027797 | 21028538 | CG10585  | 129 | 37.683  | 4.97 |
| chr3L | 21058588 | 21059007 | siz      | 26  | 14.2988 | 3.12 |
| chr3L | 21135588 | 21136173 | CG10565  | 207 | 25.1125 | 4.10 |
| chr3L | 21175432 | 21176821 | chb      | 142 | 40.5164 | 6.15 |

|       |          |          |           |       |         |      |
|-------|----------|----------|-----------|-------|---------|------|
| chr3L | 21202298 | 21202959 | CG33054   | 167   | 12.3743 | 3.19 |
| chr3L | 21202298 | 21202959 | CG33056   | 167   | 12.3743 | 3.19 |
| chr3L | 21202298 | 21202959 | CG10512   | 204   | 12.3743 | 3.19 |
| chr3L | 21216471 | 21217251 | CG12975   | 50    | 25.0089 | 4.77 |
| chr3L | 21216471 | 21217251 | Ilk       | 111   | 25.0089 | 4.77 |
| chr3L | 21279720 | 21280132 | AcCoAS    | 48    | 17.6368 | 3.24 |
| chr3L | 21317470 | 21318172 | Pc        | 44    | 17.8796 | 3.53 |
| chr3L | 21342931 | 21343816 | CG7324    | 150   | 23.2622 | 4.07 |
| chr3L | 21382355 | 21382807 | rgn       | 62    | 38.9571 | 6.02 |
| chr3L | 21432735 | 21434303 | barc      | 521   | 22.7835 | 4.41 |
| chr3L | 21432735 | 21434303 | Aef1      | 217   | 22.7835 | 4.41 |
| chr3L | 21497185 | 21497605 | Hr78      | 49    | 19.7277 | 3.96 |
| chr3L | 21497185 | 21497605 | CR43933   | 91    | 19.7277 | 3.96 |
| chr3L | 21507267 | 21508213 | Glg1      | 58    | 20.0863 | 3.98 |
| chr3L | 21507267 | 21508213 | M6        | 371   | 20.0863 | 3.98 |
| chr3L | 21536952 | 21537778 | Rpn10     | 171   | 28.5549 | 5.27 |
| chr3L | 21538974 | 21540394 | COX8      | 148   | 33.8965 | 5.05 |
| chr3L | 21538974 | 21540394 | VhaM9.7-b | 562   | 33.8965 | 5.05 |
| chr3L | 21554094 | 21555088 | Wnk       | 76    | 13.0377 | 3.41 |
| chr3L | 21568335 | 21568971 | CRIF      | 192   | 16.9672 | 3.88 |
| chr3L | 21626252 | 21626690 | CG11306   | 201   | 22.1747 | 4.85 |
| chr3L | 21635261 | 21635759 | ORMDL     | 142   | 15.9328 | 3.63 |
| chr3L | 21679202 | 21679796 | Als2      | 158   | 12.6879 | 3.34 |
| chr3L | 21821920 | 21822283 | CycH      | 130   | 14.3784 | 3.75 |
| chr3L | 21824658 | 21825794 | CG7414    | 171   | 20.4553 | 4.14 |
| chr3L | 21832587 | 21833373 | Nopp140   | 28    | 27.6043 | 5.15 |
| chr3L | 21840735 | 21841472 | P5CDh1    | 45    | 26.6451 | 4.29 |
| chr3L | 21879490 | 21880777 | mub       | 111   | 29.5476 | 4.54 |
| chr3L | 22070925 | 22071940 | CG7139    | 96    | 16.9964 | 3.65 |
| chr3L | 22262181 | 22262989 | Rich      | 144   | 27.5071 | 5.20 |
| chr3L | 22266140 | 22266786 | CG11523   | 107   | 25.9862 | 5.10 |
| chr3L | 22267209 | 22267963 | Csp       | 158   | 21.7012 | 4.22 |
| chr3L | 22287618 | 22288240 | Hem       | 161   | 15.2023 | 3.58 |
| chr3L | 22288501 | 22289566 | Aats-ile  | 61    | 34.0473 | 6.07 |
| chr3L | 22740898 | 22742571 | I(3)04053 | 481   | 45.2205 | 6.06 |
| chr3L | 22740898 | 22742571 | CG7369    | 77    | 45.2205 | 6.06 |
| chr3L | 22863575 | 22865155 | CG33169   | 14    | 38.0523 | 5.42 |
| chr3L | 22863575 | 22865155 | CG33170   | 750   | 38.0523 | 5.42 |
| chr3L | 22870775 | 22872264 | Arf79F    | 158   | 16.4922 | 3.31 |
| chr3L | 22870775 | 22872264 | CR45969   | 567   | 16.4922 | 3.31 |
| chr3L | 22870775 | 22872264 | Arf79F    | 807   | 16.4922 | 3.31 |
| chr3L | 22870775 | 22872264 | CG11109   | 954   | 16.4922 | 3.31 |
| chr3L | 22870775 | 22872264 | Arf79F    | 986   | 16.4922 | 3.31 |
| chr3L | 22870775 | 22872264 | CG11109   | 1012  | 16.4922 | 3.31 |
| chr3L | 25216937 | 25217361 | UQCR-11   | 96335 | 12.0224 | 3.20 |
| chr3R | 4130250  | 4130952  | Gfat1     | 67    | 11.3549 | 3.65 |
| chr3R | 4174386  | 4176171  | CG12581   | 42    | 11.8909 | 3.14 |
| chr3R | 4233011  | 4233461  | abs       | 217   | 14.499  | 3.62 |
| chr3R | 4311495  | 4311944  | CG9791    | 102   | 19.6858 | 4.10 |
| chr3R | 4319454  | 4320179  | CG9795    | 113   | 17.3106 | 3.75 |
| chr3R | 4333472  | 4334208  | CG9776    | 146   | 18.9722 | 3.92 |
| chr3R | 4378724  | 4379502  | CG11739   | 64    | 42.4039 | 5.10 |
| chr3R | 4397341  | 4397897  | CG9855    | 246   | 18.5168 | 4.38 |
| chr3R | 4399283  | 4400039  | CG9853    | 190   | 28.6173 | 5.08 |
| chr3R | 4400417  | 4401166  | CG14647   | 103   | 12.5864 | 3.03 |
| chr3R | 4402910  | 4404279  | CR45187   | 253   | 47.3611 | 5.41 |

|       |         |         |           |      |         |      |
|-------|---------|---------|-----------|------|---------|------|
| chr3R | 4402910 | 4404279 | lost      | 106  | 47.3611 | 5.41 |
| chr3R | 4428546 | 4429506 | srl       | 129  | 29.1296 | 4.35 |
| chr3R | 4433572 | 4434225 | eIF3-S10  | 75   | 33.0896 | 5.03 |
| chr3R | 4433572 | 4434225 | CG1074    | 144  | 33.0896 | 5.03 |
| chr3R | 4436757 | 4437801 | CG9804    | 206  | 11.8909 | 3.14 |
| chr3R | 4436757 | 4437801 | CG14650   | 149  | 11.8909 | 3.14 |
| chr3R | 4470938 | 4471424 | CG31523   | 51   | 17.7143 | 3.83 |
| chr3R | 4484997 | 4485422 | Fip1      | 218  | 21.3712 | 4.82 |
| chr3R | 4649300 | 4650552 | Karybeta3 | 287  | 29.8249 | 4.54 |
| chr3R | 4659415 | 4660411 | CG43427   | 99   | 37.361  | 4.68 |
| chr3R | 4713751 | 4714529 | CG9769    | 111  | 24.7707 | 4.61 |
| chr3R | 4739142 | 4739886 | tacc      | 41   | 19.0499 | 4.03 |
| chr3R | 4811633 | 4812260 | ctrip     | 90   | 14.9783 | 3.17 |
| chr3R | 4811633 | 4812260 | Hus1-like | 90   | 14.9783 | 3.17 |
| chr3R | 4811633 | 4812260 | ctrip     | 90   | 14.9783 | 3.17 |
| chr3R | 4811633 | 4812260 | Hus1-like | 90   | 14.9783 | 3.17 |
| chr3R | 4813236 | 4813700 | CG1129    | 98   | 16.3088 | 3.32 |
| chr3R | 4820642 | 4821509 | CG14657   | 197  | 31.7094 | 4.92 |
| chr3R | 4852191 | 4852862 | opa       | 361  | 29.4106 | 4.61 |
| chr3R | 4910420 | 4911457 | Cdep      | 84   | 31.4773 | 4.43 |
| chr3R | 4951669 | 4952897 | Ubc6      | 3    | 19.1506 | 3.62 |
| chr3R | 4955017 | 4955729 | CG14661   | 31   | 23.4571 | 4.72 |
| chr3R | 5086403 | 5087403 | corto     | 113  | 36.0295 | 5.28 |
| chr3R | 5216180 | 5217667 | cno       | 50   | 33.6668 | 5.55 |
| chr3R | 5222557 | 5223482 | CG2604    | 72   | 24.9643 | 4.39 |
| chr3R | 5231311 | 5233041 | Kat60     | 140  | 42.9923 | 6.09 |
| chr3R | 5231311 | 5233041 | Mms19     | 473  | 42.9923 | 6.09 |
| chr3R | 5251157 | 5251884 | CG12163   | 222  | 26.0427 | 4.37 |
| chr3R | 5355079 | 5355586 | CG1161    | 241  | 20.4879 | 4.00 |
| chr3R | 5357543 | 5358272 | Prosbeta7 | 142  | 16.9818 | 3.49 |
| chr3R | 5367536 | 5368448 | Cerk      | 82   | 21.2353 | 3.83 |
| chr3R | 5371616 | 5372245 | RpII18    | 46   | 25.6037 | 4.44 |
| chr3R | 5463292 | 5463643 | PEK       | 344  | 14.9618 | 3.82 |
| chr3R | 5463968 | 5464781 | PEK       | 167  | 19.0643 | 4.19 |
| chr3R | 5466635 | 5467191 | RpL35A    | 189  | 19.496  | 4.12 |
| chr3R | 5516536 | 5517710 | ltp-r83A  | 160  | 24.6739 | 4.04 |
| chr3R | 5547091 | 5547944 | CG2519    | 246  | 42.9571 | 6.15 |
| chr3R | 5564364 | 5565427 | CG14671   | 183  | 20.4414 | 3.71 |
| chr3R | 5564364 | 5565427 | CG12746   | 134  | 20.4414 | 3.71 |
| chr3R | 5567945 | 5569693 | CG2931    | 251  | 14.8243 | 3.59 |
| chr3R | 5567945 | 5569693 | Rheb      | 556  | 14.8243 | 3.59 |
| chr3R | 5587579 | 5588503 | CG2926    | 259  | 36.3471 | 5.44 |
| chr3R | 5590960 | 5592437 | noi       | 124  | 21.2264 | 4.18 |
| chr3R | 5590960 | 5592437 | Vha26     | 427  | 21.2264 | 4.18 |
| chr3R | 5599147 | 5602054 | kra       | 98   | 31.9333 | 4.85 |
| chr3R | 5599147 | 5602054 | CG1427    | 394  | 31.9333 | 4.85 |
| chr3R | 5623087 | 5625068 | CG2911    | 1498 | 33.3852 | 4.74 |
| chr3R | 5623087 | 5625068 | Spec2     | 524  | 33.3852 | 4.74 |
| chr3R | 5623087 | 5625068 | CG2911    | 524  | 33.3852 | 4.74 |
| chr3R | 5623087 | 5625068 | RpL13A    | 176  | 33.3852 | 4.74 |
| chr3R | 5646746 | 5649828 | MTA1-like | 254  | 30.1024 | 4.87 |
| chr3R | 5646746 | 5649828 | Sec23     | 580  | 30.1024 | 4.87 |
| chr3R | 5653946 | 5655651 | elm       | 4    | 28.8775 | 4.73 |
| chr3R | 5653946 | 5655651 | MED27     | 281  | 28.8775 | 4.73 |
| chr3R | 5660349 | 5661260 | CG1109    | 364  | 18.8931 | 3.82 |
| chr3R | 5668672 | 5671189 | Xe7       | 488  | 16.7173 | 3.26 |



|       |         |         |             |      |         |      |
|-------|---------|---------|-------------|------|---------|------|
| chr3R | 5668672 | 5671189 | Atg17       | 110  | 16.7173 | 3.26 |
| chr3R | 5736721 | 5737040 | CG1236      | 120  | 14.4751 | 3.52 |
| chr3R | 5741805 | 5743485 | Sym         | 292  | 22.4665 | 4.16 |
| chr3R | 5741805 | 5743485 | Madm        | 259  | 22.4665 | 4.16 |
| chr3R | 5758266 | 5759157 | Sec8        | 194  | 33.096  | 5.38 |
| chr3R | 5778816 | 5780095 | jagn        | 235  | 23.5522 | 4.16 |
| chr3R | 6007387 | 6008751 | Rm62        | 149  | 33.6771 | 4.87 |
| chr3R | 6345259 | 6346466 | SmD2        | 169  | 17.8229 | 4.16 |
| chr3R | 6345259 | 6346466 | CG18048     | 368  | 17.8229 | 4.16 |
| chr3R | 6367592 | 6368334 | CG42724     | 128  | 16.1486 | 3.72 |
| chr3R | 6368902 | 6369398 | CG10286     | 128  | 24.577  | 3.95 |
| chr3R | 6382834 | 6383657 | godzilla    | 232  | 28.0294 | 4.97 |
| chr3R | 6405161 | 6406058 | Dmtn        | 110  | 29.4318 | 4.20 |
| chr3R | 6646778 | 6647217 | Taf1        | 159  | 28.8775 | 4.73 |
| chr3R | 6657080 | 6657491 | CG1307      | 228  | 9.43592 | 3.35 |
| chr3R | 6657791 | 6658336 | twr         | 227  | 14.4428 | 3.76 |
| chr3R | 7066732 | 7067802 | CG1105      | 452  | 19.1732 | 3.70 |
| chr3R | 7066732 | 7067802 | CG1965      | 188  | 19.1732 | 3.70 |
| chr3R | 7073887 | 7075658 | CG1104      | 178  | 21.5745 | 4.01 |
| chr3R | 7073887 | 7075658 | CG1943      | 584  | 21.5745 | 4.01 |
| chr3R | 7073887 | 7075658 | CR45908     | 1213 | 21.5745 | 4.01 |
| chr3R | 7079746 | 7080425 | Ref1        | 284  | 36.4986 | 5.72 |
| chr3R | 7084994 | 7087817 | Tailor      | 1154 | 51.5374 | 5.79 |
| chr3R | 7084994 | 7087817 | CR45907     | 1058 | 51.5374 | 5.79 |
| chr3R | 7084994 | 7087817 | Tailor      | 634  | 51.5374 | 5.79 |
| chr3R | 7084994 | 7087817 | alphaTub84B | 119  | 51.5374 | 5.79 |
| chr3R | 7123459 | 7125086 | Alh         | 192  | 37.8062 | 5.56 |
| chr3R | 7123459 | 7125086 | CG10098     | 554  | 37.8062 | 5.56 |
| chr3R | 7185653 | 7187596 | CG10055     | 208  | 42.3901 | 5.37 |
| chr3R | 7185653 | 7187596 | lap         | 528  | 42.3901 | 5.37 |
| chr3R | 7474540 | 7475038 | snRNA:7SK   | 228  | 29.0081 | 4.70 |
| chr3R | 7491236 | 7491858 | alpha-Est10 | 36   | 42.9923 | 6.09 |
| chr3R | 7515166 | 7516118 | alpha-Est8  | 42   | 16.4711 | 3.93 |
| chr3R | 7760910 | 7761396 | Sp7         | 65   | 18.1543 | 4.01 |
| chr3R | 7911320 | 7911830 | Prat        | 152  | 13.1443 | 3.03 |
| chr3R | 7912931 | 7913326 | CG2846      | 193  | 13.94   | 3.38 |
| chr3R | 8001272 | 8002417 | Kmn2        | 272  | 11.7057 | 3.14 |
| chr3R | 8001272 | 8002417 | CG2698      | 20   | 11.7057 | 3.14 |
| chr3R | 8029941 | 8031318 | CG10903     | 237  | 21.3939 | 4.26 |
| chr3R | 8029941 | 8031318 | CG2747      | 143  | 21.3939 | 4.26 |
| chr3R | 8029941 | 8031318 | CG10903     | 179  | 21.3939 | 4.26 |
| chr3R | 8032612 | 8033784 | CG11035     | 409  | 11.7057 | 3.14 |
| chr3R | 8032612 | 8033784 | unc-45      | 118  | 11.7057 | 3.14 |
| chr3R | 8125898 | 8127383 | CG9667      | 350  | 32.5623 | 5.23 |
| chr3R | 8125898 | 8127383 | Gie         | 103  | 32.5623 | 5.23 |
| chr3R | 8240267 | 8240631 | Ada2b       | 86   | 14.2928 | 3.44 |
| chr3R | 8243715 | 8244584 | CG9636      | 428  | 14.3111 | 3.85 |
| chr3R | 8243715 | 8244584 | CG33722     | 166  | 14.3111 | 3.85 |
| chr3R | 8243715 | 8244584 | CG18749     | 166  | 14.3111 | 3.85 |
| chr3R | 8243715 | 8244584 | CG33722     | 166  | 14.3111 | 3.85 |
| chr3R | 8243715 | 8244584 | CG18749     | 166  | 14.3111 | 3.85 |
| chr3R | 8243715 | 8244584 | CG33722     | 73   | 14.3111 | 3.85 |
| chr3R | 8301294 | 8301671 | mRpL1       | 3    | 10.7872 | 3.23 |
| chr3R | 8313107 | 8313690 | eIF4AIII    | 180  | 18.6368 | 4.16 |
| chr3R | 8356828 | 8358212 | stck        | 104  | 12.2801 | 3.10 |
| chr3R | 8517735 | 8518295 | CG11737     | 100  | 12.261  | 3.13 |

|       |         |         |            |      |         |      |
|-------|---------|---------|------------|------|---------|------|
| chr3R | 8652328 | 8653601 | Dhod       | 298  | 20.8513 | 4.27 |
| chr3R | 8652328 | 8653601 | CG11753    | 277  | 20.8513 | 4.27 |
| chr3R | 8652328 | 8653601 | Dhod       | 181  | 20.8513 | 4.27 |
| chr3R | 8652328 | 8653601 | CG11753    | 87   | 20.8513 | 4.27 |
| chr3R | 8659451 | 8660696 | bel        | 59   | 27.6913 | 4.59 |
| chr3R | 8663405 | 8664895 | p          | 84   | 11.9822 | 3.12 |
| chr3R | 8663405 | 8664895 | CG8032     | 299  | 11.9822 | 3.12 |
| chr3R | 8669086 | 8670221 | CG8036     | 43   | 58.4172 | 6.25 |
| chr3R | 8732037 | 8732579 | CG8202     | 111  | 12.0756 | 3.13 |
| chr3R | 8746955 | 8748374 | CG9801     | 23   | 24.9526 | 4.12 |
| chr3R | 8746955 | 8748374 | CG8223     | 145  | 24.9526 | 4.12 |
| chr3R | 8801380 | 8802061 | Tcp-1eta   | 212  | 14.6522 | 3.43 |
| chr3R | 8819765 | 8820934 | CG9821     | 33   | 37.157  | 5.46 |
| chr3R | 8819765 | 8820934 | CR43130    | 120  | 37.157  | 5.46 |
| chr3R | 8823491 | 8824955 | IscU       | 146  | 17.9766 | 3.62 |
| chr3R | 8823491 | 8824955 | CG8379     | 379  | 17.9766 | 3.62 |
| chr3R | 8846139 | 8846497 | pyd        | 45   | 12.0756 | 3.13 |
| chr3R | 8931634 | 8932130 | pyd        | 42   | 41.0683 | 5.60 |
| chr3R | 8983668 | 8984293 | RagA-B     | 245  | 12.4986 | 3.43 |
| chr3R | 8984645 | 8985353 | CG11970    | 76   | 16.4711 | 3.93 |
| chr3R | 8992436 | 8993597 | E(var)3-9  | 389  | 16.4459 | 3.52 |
| chr3R | 8992436 | 8993597 | CG11975    | 86   | 16.4459 | 3.52 |
| chr3R | 9013507 | 9015344 | CG11984    | 103  | 32.1788 | 5.11 |
| chr3R | 9013507 | 9015344 | CG11985    | 1412 | 32.1788 | 5.11 |
| chr3R | 9019420 | 9020116 | tgo        | 176  | 33.7854 | 4.66 |
| chr3R | 9052365 | 9054936 | Kdm2       | 29   | 19.8808 | 3.66 |
| chr3R | 9064176 | 9065121 | beag       | 152  | 16.9799 | 3.93 |
| chr3R | 9260574 | 9261246 | VhaM8.9    | 158  | 24.3896 | 4.49 |
| chr3R | 9266313 | 9267653 | Aats-trp   | 232  | 14.1853 | 3.56 |
| chr3R | 9266313 | 9267653 | Vps16A     | 118  | 14.1853 | 3.56 |
| chr3R | 9334419 | 9335680 | CG8866     | 466  | 18.9129 | 4.22 |
| chr3R | 9334419 | 9335680 | CG8121     | 11   | 18.9129 | 4.22 |
| chr3R | 9400404 | 9401584 | RpL34b     | 83   | 49.3511 | 6.51 |
| chr3R | 9400404 | 9401584 | CG8132     | 391  | 49.3511 | 6.51 |
| chr3R | 9502125 | 9502673 | RhoL       | 120  | 12.9588 | 3.03 |
| chr3R | 9509778 | 9510480 | rump       | 329  | 16.615  | 3.54 |
| chr3R | 9515383 | 9516620 | mRpL47     | 145  | 21.4013 | 4.12 |
| chr3R | 9515383 | 9516620 | CG8176     | 47   | 21.4013 | 4.12 |
| chr3R | 9515383 | 9516620 | JHDM2      | 47   | 21.4013 | 4.12 |
| chr3R | 9515383 | 9516620 | CG8176     | 47   | 21.4013 | 4.12 |
| chr3R | 9532117 | 9533446 | by         | 66   | 40.8658 | 6.14 |
| chr3R | 9550938 | 9552511 | mura       | 299  | 24.2448 | 3.98 |
| chr3R | 9550938 | 9552511 | CR42549    | 111  | 24.2448 | 3.98 |
| chr3R | 9550938 | 9552511 | mura       | 169  | 24.2448 | 3.98 |
| chr3R | 9550938 | 9552511 | CR42549    | 169  | 24.2448 | 3.98 |
| chr3R | 9550938 | 9552511 | RnpS1      | 396  | 24.2448 | 3.98 |
| chr3R | 9559143 | 9560567 | AP-1mu     | 421  | 48.6978 | 6.10 |
| chr3R | 9559143 | 9560567 | MBD-like   | 187  | 48.6978 | 6.10 |
| chr3R | 9562913 | 9564649 | CG9393     | 63   | 19.8434 | 4.08 |
| chr3R | 9562913 | 9564649 | Vps45      | 313  | 19.8434 | 4.08 |
| chr3R | 9573236 | 9574282 | CG9399     | 77   | 42.6828 | 5.27 |
| chr3R | 9577127 | 9578527 | Kap-alpha3 | 15   | 23.6052 | 4.21 |
| chr3R | 9577127 | 9578527 | CG8273     | 323  | 23.6052 | 4.21 |
| chr3R | 9590558 | 9591645 | bocks      | 202  | 28.2367 | 4.48 |
| chr3R | 9590558 | 9591645 | CG8312     | 508  | 28.2367 | 4.48 |
| chr3R | 9629720 | 9631125 | Calr       | 59   | 54.5095 | 6.01 |

|       |          |          |                    |       |         |      |
|-------|----------|----------|--------------------|-------|---------|------|
| chr3R | 9631562  | 9632350  | SpdS               | 26    | 29.9385 | 5.47 |
| chr3R | 9636689  | 9637693  | Scm                | 74    | 16.8561 | 4.19 |
| chr3R | 9677732  | 9678589  | CG16817            | 245   | 31.3656 | 5.03 |
| chr3R | 9704104  | 9705722  | Unc-115a           | 45    | 35.8458 | 4.99 |
| chr3R | 9710680  | 9711538  | trbd               | 81    | 14.6954 | 3.29 |
| chr3R | 9710680  | 9711538  | dmt                | 185   | 14.6954 | 3.29 |
| chr3R | 9746244  | 9747686  | CG34409            | 971   | 39.0009 | 5.95 |
| chr3R | 9746244  | 9747686  | CG12948            | 168   | 39.0009 | 5.95 |
| chr3R | 9762411  | 9763268  | Snap24             | 214   | 28.0095 | 5.23 |
| chr3R | 9767362  | 9768506  | MED6               | 91    | 30.3917 | 5.22 |
| chr3R | 9767362  | 9768506  | CG8481             | 73    | 30.3917 | 5.22 |
| chr3R | 9767362  | 9768506  | MED6               | 204   | 30.3917 | 5.22 |
| chr3R | 9777737  | 9778673  | RpS29              | 214   | 22.4983 | 4.03 |
| chr3R | 9777737  | 9778673  | snoRNA:Psi18S-1275 | 87    | 22.4983 | 4.03 |
| chr3R | 9808478  | 9809540  | FBXO11             | 295   | 31.7402 | 5.40 |
| chr3R | 9928568  | 9929376  | Glut4EF            | 22    | 48.3256 | 6.35 |
| chr3R | 9932065  | 9933732  | Glut4EF            | 3713  | 26.0427 | 4.37 |
| chr3R | 9946326  | 9947030  | Glut4EF            | 17919 | 19.7343 | 4.16 |
| chr3R | 9949778  | 9950402  | Glut4EF            | 21072 | 18.6024 | 3.57 |
| chr3R | 10042347 | 10043029 | Mical              | 15    | 29.752  | 4.98 |
| chr3R | 10144514 | 10145133 | Invadolysin        | 88    | 42.3045 | 4.92 |
| chr3R | 10170203 | 10170830 | Best1              | 42    | 19.6243 | 3.86 |
| chr3R | 10189353 | 10189894 | CG12814            | 26    | 14.8797 | 3.28 |
| chr3R | 10264064 | 10264880 | CG43143            | 69    | 35.9049 | 4.78 |
| chr3R | 10330818 | 10331831 | Bruce              | 149   | 51.7897 | 6.49 |
| chr3R | 10330818 | 10331831 | CG12818            | 376   | 51.7897 | 6.49 |
| chr3R | 10349878 | 10350855 | jumu               | 67    | 23.7056 | 4.27 |
| chr3R | 10388205 | 10389382 | cwo                | 119   | 17.0617 | 3.75 |
| chr3R | 10760591 | 10761858 | MED7               | 446   | 19.3567 | 3.69 |
| chr3R | 10760591 | 10761858 | Cap-H2             | 169   | 19.3567 | 3.69 |
| chr3R | 10760591 | 10761858 | CR45016            | 319   | 19.3567 | 3.69 |
| chr3R | 10787711 | 10788576 | Art1               | 231   | 9.10851 | 3.11 |
| chr3R | 10787711 | 10788576 | Mcm5               | 528   | 9.10851 | 3.11 |
| chr3R | 10854154 | 10854954 | CG6567             | 185   | 11.6869 | 3.13 |
| chr3R | 10854154 | 10854954 | CG4511             | 234   | 11.6869 | 3.13 |
| chr3R | 10862631 | 10863715 | CG6574             | 54    | 18.1467 | 3.77 |
| chr3R | 10868051 | 10869552 | SeIR               | 183   | 26.8679 | 4.76 |
| chr3R | 10868051 | 10869552 | Tsp86D             | 118   | 26.8679 | 4.76 |
| chr3R | 10881748 | 10882476 | Tpc1               | 135   | 26.5433 | 5.07 |
| chr3R | 10888822 | 10889492 | Adk3               | 82    | 25.6342 | 4.35 |
| chr3R | 11157049 | 11157367 | Ugt86Da            | 104   | 13.4156 | 3.59 |
| chr3R | 11209166 | 11210902 | SdhC               | 472   | 21.0064 | 3.76 |
| chr3R | 11209166 | 11210902 | Tctp               | 75    | 21.0064 | 3.76 |
| chr3R | 11215508 | 11217089 | RpS25              | 135   | 23.1018 | 4.08 |
| chr3R | 11215508 | 11217089 | CG4820             | 382   | 23.1018 | 4.08 |
| chr3R | 11220859 | 11222459 | CG6693             | 490   | 36.522  | 5.35 |
| chr3R | 11220859 | 11222459 | RpL3               | 236   | 36.522  | 5.35 |
| chr3R | 11220859 | 11222459 | snoRNA:Me18S-C109  | 275   | 36.522  | 5.35 |
| chr3R | 11234483 | 11236478 | Arfip              | 496   | 12.3947 | 3.32 |
| chr3R | 11234483 | 11236478 | CG17721            | 127   | 12.3947 | 3.32 |
| chr3R | 11234483 | 11236478 | CG31441            | 776   | 12.3947 | 3.32 |
| chr3R | 11243443 | 11245011 | CG17734            | 209   | 16.0879 | 3.45 |
| chr3R | 11243443 | 11245011 | CG5214             | 511   | 16.0879 | 3.45 |
| chr3R | 11407862 | 11408255 | mRpL40             | 120   | 30.8654 | 4.69 |
| chr3R | 11409439 | 11410495 | mgr                | 168   | 17.5561 | 3.94 |
| chr3R | 11409439 | 11410495 | lrbp               | 339   | 17.5561 | 3.94 |

|       |          |          |            |      |         |      |
|-------|----------|----------|------------|------|---------|------|
| chr3R | 11430854 | 11432350 | RpL24-like | 187  | 37.8066 | 5.18 |
| chr3R | 11430854 | 11432350 | CG5276     | 342  | 37.8066 | 5.18 |
| chr3R | 11435109 | 11436440 | CG6744     | 63   | 12.393  | 3.46 |
| chr3R | 11435109 | 11436440 | CG5281     | 305  | 12.393  | 3.46 |
| chr3R | 11563016 | 11563513 | sea        | 56   | 15.7576 | 3.64 |
| chr3R | 11566653 | 11567186 | fabp       | 133  | 29.9359 | 4.70 |
| chr3R | 11566653 | 11567186 | sea        | 133  | 29.9359 | 4.70 |
| chr3R | 11581312 | 11582623 | wkd        | 256  | 26.7784 | 4.81 |
| chr3R | 11589651 | 11590331 | CG6791     | 118  | 18.4532 | 4.07 |
| chr3R | 11619595 | 11620533 | Jupiter    | 65   | 17.7161 | 3.62 |
| chr3R | 11619595 | 11620533 | CG14710    | 248  | 17.7161 | 3.62 |
| chr3R | 11622991 | 11623752 | CG6808     | 407  | 17.0664 | 3.80 |
| chr3R | 11622991 | 11623752 | CG14711    | 166  | 17.0664 | 3.80 |
| chr3R | 11628529 | 11629147 | CG14712    | 128  | 14.3728 | 3.60 |
| chr3R | 11655917 | 11656449 | CG42327    | 37   | 19.2515 | 3.68 |
| chr3R | 11669745 | 11670273 | CG14715    | 4105 | 13.2485 | 3.71 |
| chr3R | 11758944 | 11760182 | Lk6        | 619  | 24.8825 | 4.52 |
| chr3R | 11763401 | 11764744 | Lk6        | 211  | 28.1953 | 4.62 |
| chr3R | 11777878 | 11779177 | l(3)neo38  | 56   | 82.9838 | 8.26 |
| chr3R | 11786341 | 11787477 | CG17360    | 248  | 16.1055 | 3.96 |
| chr3R | 11786341 | 11787477 | HisCl1     | 649  | 16.1055 | 3.96 |
| chr3R | 11796367 | 11797090 | Sbf        | 86   | 15.5555 | 3.56 |
| chr3R | 11818696 | 11820196 | glo        | 480  | 33.0659 | 5.03 |
| chr3R | 11818696 | 11820196 | COX5A      | 221  | 33.0659 | 5.03 |
| chr3R | 11868622 | 11869663 | CG6959     | 44   | 48.6278 | 6.21 |
| chr3R | 11882028 | 11883239 | CG6962     | 420  | 24.1873 | 4.09 |
| chr3R | 11882028 | 11883239 | CG31368    | 165  | 24.1873 | 4.09 |
| chr3R | 11886670 | 11887321 | mthl5      | 61   | 16.148  | 3.97 |
| chr3R | 11948573 | 11949310 | Cad87A     | 60   | 62.5446 | 7.09 |
| chr3R | 11949588 | 11950285 | CG31211    | 302  | 28.946  | 4.96 |
| chr3R | 11958107 | 11958673 | Hsp70Aa    | 19   | 29.9106 | 4.38 |
| chr3R | 11958107 | 11958673 | Hsp70Ab    | 18   | 29.9106 | 4.38 |
| chr3R | 11967026 | 11968056 | CG12213    | 225  | 22.4665 | 4.16 |
| chr3R | 11967026 | 11968056 | GC1        | 475  | 22.4665 | 4.16 |
| chr3R | 12016137 | 12016927 | CG3313     | 671  | 7.50858 | 3.01 |
| chr3R | 12017200 | 12017492 | Spt3       | 238  | 12.6847 | 3.44 |
| chr3R | 12090203 | 12090909 | ATP8B      | 14   | 27.1138 | 4.99 |
| chr3R | 12121196 | 12121501 | CG4702     | 6843 | 20.8177 | 4.43 |
| chr3R | 12355784 | 12356339 | MBD-R2     | 126  | 28.8775 | 4.73 |
| chr3R | 12369000 | 12369615 | GstD1      | 11   | 71.3124 | 8.50 |
| chr3R | 12405586 | 12406016 | Cyp9f2     | 158  | 16.0888 | 3.53 |
| chr3R | 12425247 | 12426316 | Pp1-87B    | 197  | 21.8876 | 4.41 |
| chr3R | 12429002 | 12429386 | CG5641     | 169  | 10.3353 | 3.01 |
| chr3R | 12431016 | 12431709 | Prosalph2  | 206  | 16.6278 | 3.44 |
| chr3R | 12459694 | 12460167 | CG5961     | 189  | 11.8446 | 3.33 |
| chr3R | 12719314 | 12720099 | Men        | 67   | 22.4738 | 4.31 |
| chr3R | 12857277 | 12857815 | CG10126    | 36   | 17.6866 | 4.26 |
| chr3R | 12985960 | 12986752 | CG31342    | 90   | 21.6057 | 4.47 |
| chr3R | 12997131 | 12997671 | CG44194    | 74   | 16.2998 | 4.07 |
| chr3R | 12997131 | 12997671 | CG17327    | 74   | 16.2998 | 4.07 |
| chr3R | 12997946 | 12998639 | CG7518     | 93   | 44.8686 | 5.83 |
| chr3R | 13010735 | 13012871 | CG8031     | 164  | 31.7926 | 4.69 |
| chr3R | 13010735 | 13012871 | CtBP       | 502  | 31.7926 | 4.69 |
| chr3R | 13051923 | 13052726 | pic        | 217  | 26.6031 | 4.77 |
| chr3R | 13260155 | 13260921 | CG11686    | 1    | 31.5922 | 4.96 |
| chr3R | 13263669 | 13264635 | Ravus      | 400  | 14.8323 | 3.42 |

|       |          |          |            |      |         |      |
|-------|----------|----------|------------|------|---------|------|
| chr3R | 13263669 | 13264635 | Su(var)3-7 | 98   | 14.8323 | 3.42 |
| chr3R | 13364372 | 13365293 | poly       | 362  | 16.6246 | 3.51 |
| chr3R | 13364372 | 13365293 | Dic1       | 13   | 16.6246 | 3.51 |
| chr3R | 13388208 | 13388811 | CG9799     | 194  | 24.9643 | 4.39 |
| chr3R | 13401227 | 13401990 | GILT1      | 72   | 28.7239 | 5.04 |
| chr3R | 13434310 | 13434975 | yrt        | 206  | 14.2378 | 3.18 |
| chr3R | 13644865 | 13646304 | sqd        | 22   | 42.4869 | 5.76 |
| chr3R | 13660084 | 13660665 | Hrb87F     | 151  | 41.3964 | 5.43 |
| chr3R | 13661181 | 13661889 | B52        | 131  | 56.83   | 7.53 |
| chr3R | 13683661 | 13685346 | flf        | 257  | 18.9737 | 3.63 |
| chr3R | 13715075 | 13715494 | CG34383    | 41   | 17.2252 | 3.30 |
| chr3R | 13831400 | 13831820 | Mst87F     | 3679 | 9.81937 | 3.24 |
| chr3R | 13837494 | 13838179 | Nsf2       | 137  | 19.3727 | 4.14 |
| chr3R | 13874811 | 13875550 | E5         | 243  | 16.8023 | 3.90 |
| chr3R | 14024837 | 14026078 | rdx        | 900  | 37.8858 | 5.51 |
| chr3R | 14051634 | 14053697 | foxo       | 3801 | 12.2258 | 3.28 |
| chr3R | 14056760 | 14057197 | foxo       | 46   | 26.6266 | 4.61 |
| chr3R | 14217035 | 14217937 | CG9649     | 130  | 12.0756 | 3.13 |
| chr3R | 14308037 | 14308580 | su(Hw)     | 301  | 10.7267 | 3.01 |
| chr3R | 14309011 | 14309570 | RpII15     | 72   | 16.721  | 3.78 |
| chr3R | 14315980 | 14316711 | Set8       | 127  | 21.0665 | 3.85 |
| chr3R | 14326051 | 14327687 | Afti       | 187  | 31.7094 | 4.92 |
| chr3R | 14326051 | 14327687 | ATPsynE    | 444  | 31.7094 | 4.92 |
| chr3R | 14511028 | 14512145 | HtrA2      | 24   | 15.1903 | 3.49 |
| chr3R | 14511028 | 14512145 | mRpL11     | 401  | 15.1903 | 3.49 |
| chr3R | 14557840 | 14558732 | Pde6       | 14   | 17.707  | 4.14 |
| chr3R | 14569193 | 14569804 | Cys        | 8    | 21.7383 | 3.99 |
| chr3R | 14625006 | 14626439 | put        | 262  | 22.324  | 3.85 |
| chr3R | 14625006 | 14626439 | His4r      | 313  | 22.324  | 3.85 |
| chr3R | 14696995 | 14697486 | Meltrin    | 49   | 18.7755 | 3.50 |
| chr3R | 14723556 | 14724491 | kibra      | 108  | 24.478  | 4.17 |
| chr3R | 14739170 | 14741812 | eff        | 119  | 14.2988 | 3.12 |
| chr3R | 14739170 | 14741812 | jvl        | 909  | 14.2988 | 3.12 |
| chr3R | 14853666 | 14854205 | btsz       | 61   | 18.4177 | 4.29 |
| chr3R | 14889793 | 14890809 | CycC       | 78   | 16.3203 | 3.70 |
| chr3R | 14889793 | 14890809 | UQCR-C1    | 53   | 16.3203 | 3.70 |
| chr3R | 14903546 | 14904265 | VhaPPA1-1  | 128  | 29.0724 | 5.23 |
| chr3R | 15094533 | 15096081 | CG6966     | 205  | 46.7035 | 6.88 |
| chr3R | 15131593 | 15132065 | CG42788    | 61   | 34.2191 | 4.00 |
| chr3R | 15146623 | 15147789 | GlyS       | 16   | 22.4983 | 4.03 |
| chr3R | 15195663 | 15197114 | CG6752     | 532  | 19.4731 | 3.87 |
| chr3R | 15195663 | 15197114 | CG42542    | 145  | 19.4731 | 3.87 |
| chr3R | 15206167 | 15206581 | Spn88Ea    | 90   | 27.9181 | 5.01 |
| chr3R | 15209078 | 15209887 | CG4203     | 229  | 40.7673 | 5.35 |
| chr3R | 15218487 | 15219790 | SIDL       | 532  | 14.6954 | 3.29 |
| chr3R | 15218487 | 15219790 | CG12241    | 151  | 14.6954 | 3.29 |
| chr3R | 15225084 | 15225971 | CG31344    | 29   | 21.6471 | 3.90 |
| chr3R | 15225084 | 15225971 | Caf1-55    | 217  | 21.6471 | 3.90 |
| chr3R | 15228989 | 15229440 | Art3       | 160  | 13.5752 | 3.48 |
| chr3R | 15242153 | 15243988 | tefu       | 1363 | 28.7545 | 4.56 |
| chr3R | 15242153 | 15243988 | Hsc70-4    | 402  | 28.7545 | 4.56 |
| chr3R | 15262747 | 15264132 | eIF-2gamma | 221  | 33.2065 | 5.53 |
| chr3R | 15262747 | 15264132 | Su(var)3-9 | 221  | 33.2065 | 5.53 |
| chr3R | 15262747 | 15264132 | eIF-2gamma | 221  | 33.2065 | 5.53 |
| chr3R | 15262747 | 15264132 | Set        | 314  | 33.2065 | 5.53 |
| chr3R | 15274525 | 15276090 | Cp190      | 28   | 21.4234 | 4.62 |

|       |          |          |               |      |         |      |
|-------|----------|----------|---------------|------|---------|------|
| chr3R | 15274525 | 15276090 | CG4338        | 308  | 21.4234 | 4.62 |
| chr3R | 15289968 | 15292034 | CG45218       | 170  | 21.7383 | 3.99 |
| chr3R | 15289968 | 15292034 | Tm1           | 24   | 21.7383 | 3.99 |
| chr3R | 15328100 | 15329137 | CG6236        | 551  | 20.1403 | 4.04 |
| chr3R | 15328100 | 15329137 | ea            | 92   | 20.1403 | 4.04 |
| chr3R | 15330591 | 15331108 | mRpL9         | 71   | 11.8887 | 3.44 |
| chr3R | 15332600 | 15334068 | FK506-bp1     | 313  | 38.826  | 5.86 |
| chr3R | 15332600 | 15334068 | Sra-1         | 181  | 38.826  | 5.86 |
| chr3R | 15342623 | 15343636 | CG6218        | 142  | 25.2495 | 4.20 |
| chr3R | 15345075 | 15346487 | Surf4         | 68   | 16.9985 | 3.83 |
| chr3R | 15345075 | 15346487 | CG31301       | 96   | 16.9985 | 3.83 |
| chr3R | 15347827 | 15348339 | CG42727       | 37   | 13.5778 | 3.39 |
| chr3R | 15347827 | 15348339 | CG42726       | 37   | 13.5778 | 3.39 |
| chr3R | 15356262 | 15357662 | Atg4b         | 447  | 24.6336 | 4.28 |
| chr3R | 15356262 | 15357662 | CG5044        | 143  | 24.6336 | 4.28 |
| chr3R | 15408108 | 15409444 | Atx2          | 123  | 22.4946 | 4.47 |
| chr3R | 15792588 | 15794983 | Acyp2         | 1054 | 30.0605 | 4.36 |
| chr3R | 15792588 | 15794983 | nsl1          | 40   | 30.0605 | 4.36 |
| chr3R | 15804022 | 15804607 | alpha-Man-IIb | 53   | 22.3363 | 4.05 |
| chr3R | 15836514 | 15837142 | ND-23         | 128  | 28.7003 | 5.60 |
| chr3R | 15933782 | 15934369 | blp           | 146  | 13.7673 | 3.56 |
| chr3R | 15972297 | 15974262 | mor           | 326  | 57.6622 | 7.20 |
| chr3R | 15972297 | 15974262 | Hel89B        | 710  | 57.6622 | 7.20 |
| chr3R | 16050659 | 16051754 | mmps          | 306  | 19.3052 | 3.89 |
| chr3R | 16097713 | 16098791 | Mhcl          | 130  | 11.8427 | 3.02 |
| chr3R | 16099087 | 16100279 | Akt1          | 151  | 24.5103 | 4.05 |
| chr3R | 16146090 | 16147463 | CG5903        | 341  | 23.839  | 4.25 |
| chr3R | 16146090 | 16147463 | CG5916        | 168  | 23.839  | 4.25 |
| chr3R | 16186552 | 16187299 | Bin1          | 150  | 24.3115 | 4.33 |
| chr3R | 16186552 | 16187299 | sra           | 49   | 24.3115 | 4.33 |
| chr3R | 16202781 | 16203203 | CG6126        | 67   | 29.7954 | 5.51 |
| chr3R | 16235279 | 16237906 | tara          | 6319 | 17.9766 | 3.79 |
| chr3R | 16240528 | 16241730 | tara          | 1494 | 16.8586 | 3.31 |
| chr3R | 16242187 | 16243113 | tara          | 71   | 28.9631 | 4.25 |
| chr3R | 16263389 | 16264963 | bor           | 244  | 26.5163 | 4.45 |
| chr3R | 16263389 | 16264963 | asun          | 419  | 26.5163 | 4.45 |
| chr3R | 16272978 | 16273669 | gish          | 329  | 13.068  | 3.61 |
| chr3R | 16305043 | 16306082 | Zip89B        | 90   | 14.499  | 3.62 |
| chr3R | 16341357 | 16342790 | SF2           | 398  | 29.1399 | 4.67 |
| chr3R | 16341357 | 16342790 | pad           | 69   | 29.1399 | 4.67 |
| chr3R | 16356241 | 16357140 | CG10311       | 61   | 12.4008 | 3.02 |
| chr3R | 16442517 | 16443354 | CG14894       | 93   | 17.5054 | 4.22 |
| chr3R | 16442517 | 16443354 | CG14882       | 292  | 17.5054 | 4.22 |
| chr3R | 16452797 | 16453986 | Pak3          | 55   | 31.4721 | 5.35 |
| chr3R | 16455995 | 16456906 | CG14883       | 147  | 11.0619 | 3.40 |
| chr3R | 16469128 | 16469780 | CG42232       | 56   | 18.1777 | 4.37 |
| chr3R | 16613985 | 16614485 | CG10340       | 100  | 13.0163 | 3.55 |
| chr3R | 16655163 | 16655781 | modSP         | 80   | 33.0429 | 5.50 |
| chr3R | 17002073 | 17003144 | CG16941       | 579  | 17.5761 | 4.00 |
| chr3R | 17002073 | 17003144 | Irc           | 60   | 17.5761 | 4.00 |
| chr3R | 17020704 | 17021228 | AdSL          | 147  | 14.6522 | 3.43 |
| chr3R | 17042694 | 17044050 | CG3995        | 642  | 19.8919 | 3.95 |
| chr3R | 17042694 | 17044050 | Patr-1        | 215  | 19.8919 | 3.95 |
| chr3R | 17053916 | 17054337 | Dad           | 32   | 19.6406 | 3.86 |
| chr3R | 17072059 | 17073130 | Ns1           | 70   | 15.7186 | 3.17 |
| chr3R | 17072059 | 17073130 | mRpS11        | 14   | 15.7186 | 3.17 |

|       |          |          |               |      |         |      |
|-------|----------|----------|---------------|------|---------|------|
| chr3R | 17079097 | 17081598 | Keap1         | 2    | 34.6523 | 5.01 |
| chr3R | 17079097 | 17081598 | kuk           | 300  | 34.6523 | 5.01 |
| chr3R | 17148889 | 17149886 | m-cup         | 43   | 13.068  | 3.08 |
| chr3R | 17148889 | 17149886 | Det           | 297  | 13.068  | 3.08 |
| chr3R | 17151495 | 17152274 | CG5292        | 199  | 20.2994 | 4.16 |
| chr3R | 17385675 | 17386856 | lute          | 345  | 27.0287 | 4.74 |
| chr3R | 17390772 | 17391469 | Brf           | 27   | 13.0377 | 3.41 |
| chr3R | 17391753 | 17392067 | CR44160       | 314  | 10.4692 | 3.08 |
| chr3R | 17539514 | 17540012 | l(3)07882     | 127  | 17.4043 | 3.73 |
| chr3R | 17540400 | 17540963 | SF1           | 162  | 18.642  | 3.95 |
| chr3R | 17546179 | 17546575 | Prx3          | 239  | 8.78992 | 3.17 |
| chr3R | 17670372 | 17670987 | CG7523        | 51   | 29.0331 | 5.29 |
| chr3R | 17699347 | 17701820 | CR46036       | 326  | 25.1778 | 4.75 |
| chr3R | 17716795 | 17718668 | osa           | 1050 | 22.0143 | 4.08 |
| chr3R | 17797871 | 17798550 | CG7379        | 185  | 14.4751 | 3.52 |
| chr3R | 17810607 | 17811811 | CG18012       | 163  | 16.3203 | 3.70 |
| chr3R | 17810607 | 17811811 | tinc          | 569  | 16.3203 | 3.70 |
| chr3R | 18121444 | 18122126 | sr            | 75   | 20.766  | 4.75 |
| chr3R | 18164016 | 18164984 | CG7218        | 94   | 22.1773 | 4.36 |
| chr3R | 18164016 | 18164984 | Cbp20         | 357  | 22.1773 | 4.36 |
| chr3R | 18165983 | 18166638 | Prx5          | 134  | 21.0679 | 4.06 |
| chr3R | 18167672 | 18169446 | PP2A-B'       | 168  | 35.1548 | 5.68 |
| chr3R | 18182867 | 18183573 | cdm           | 159  | 17.1671 | 3.56 |
| chr3R | 18185612 | 18186174 | CG7208        | 82   | 16.6414 | 4.03 |
| chr3R | 18185612 | 18186174 | Arp5          | 60   | 16.6414 | 4.03 |
| chr3R | 18197872 | 18200451 | Ssdp          | 156  | 17.8739 | 3.53 |
| chr3R | 18197872 | 18200451 | CG7985        | 417  | 17.8739 | 3.53 |
| chr3R | 18223075 | 18224086 | mTerf5        | 152  | 17.7039 | 4.20 |
| chr3R | 18223075 | 18224086 | Non3          | 113  | 17.7039 | 4.20 |
| chr3R | 18226034 | 18227149 | CG7168        | 404  | 38.2318 | 5.34 |
| chr3R | 18226034 | 18227149 | Mdh2          | 91   | 38.2318 | 5.34 |
| chr3R | 18242445 | 18245398 | 14-3-3epsilon | 169  | 31.4773 | 4.43 |
| chr3R | 18273925 | 18275481 | Vps39         | 443  | 36.2081 | 5.14 |
| chr3R | 18273925 | 18275481 | eIF-1A        | 192  | 36.2081 | 5.14 |
| chr3R | 18298191 | 18299726 | l(3)05822     | 276  | 32.598  | 4.86 |
| chr3R | 18298191 | 18299726 | Dlc90F        | 625  | 32.598  | 4.86 |
| chr3R | 18301232 | 18301854 | CG18600       | 39   | 21.6811 | 4.55 |
| chr3R | 18310522 | 18311127 | PKD           | 34   | 19.6858 | 4.10 |
| chr3R | 18314109 | 18314803 | PKD           | 13   | 16.1079 | 3.62 |
| chr3R | 18360498 | 18360870 | CG15803       | 41   | 11.0619 | 3.40 |
| chr3R | 18366438 | 18366952 | Nup43         | 203  | 11.4702 | 3.02 |
| chr3R | 18380849 | 18381461 | CG7675        | 35   | 17.4679 | 3.98 |
| chr3R | 18398700 | 18400102 | Vha100-2      | 652  | 25.7482 | 4.42 |
| chr3R | 18398700 | 18400102 | Vti1b         | 113  | 25.7482 | 4.42 |
| chr3R | 18402278 | 18402926 | CG12333       | 2    | 43.8895 | 5.98 |
| chr3R | 18412211 | 18413217 | CG31122       | 6    | 25.041  | 4.55 |
| chr3R | 18584415 | 18584735 | CG7694        | 56   | 13.1871 | 3.13 |
| chr3R | 18584415 | 18584735 | fray          | 56   | 13.1871 | 3.13 |
| chr3R | 18658540 | 18660111 | CG31224       | 115  | 24.0271 | 4.10 |
| chr3R | 18658540 | 18660111 | CstF-64       | 423  | 24.0271 | 4.10 |
| chr3R | 18739319 | 18740493 | Mekk1         | 91   | 38.6857 | 5.41 |
| chr3R | 18742579 | 18743949 | Mekk1         | 97   | 19.3143 | 3.54 |
| chr3R | 18758365 | 18759010 | CG14299       | 107  | 12.9859 | 3.23 |
| chr3R | 18906463 | 18907148 | EndoA         | 271  | 22.1547 | 4.20 |
| chr3R | 18914718 | 18915138 | Xrp1          | 19   | 10.9657 | 3.14 |
| chr3R | 18917953 | 18919258 | Xrp1          | 119  | 18.9556 | 3.49 |

|       |          |          |            |      |         |       |
|-------|----------|----------|------------|------|---------|-------|
| chr3R | 18928216 | 18928788 | Mpc1       | 134  | 28.0587 | 5.10  |
| chr3R | 18983114 | 18984314 | snRNP-U1-C | 435  | 42.2101 | 5.45  |
| chr3R | 18983114 | 18984314 | gukh       | 61   | 42.2101 | 5.45  |
| chr3R | 19023711 | 19024587 | CG6005     | 192  | 12.6315 | 3.13  |
| chr3R | 19023711 | 19024587 | CG14286    | 131  | 12.6315 | 3.13  |
| chr3R | 19027066 | 19029325 | NP15.6     | 206  | 23.1448 | 4.72  |
| chr3R | 19027066 | 19029325 | GatA       | 1284 | 23.1448 | 4.72  |
| chr3R | 19027066 | 19029325 | P5cr       | 1357 | 23.1448 | 4.72  |
| chr3R | 19030814 | 19031253 | Prp18      | 259  | 18.1375 | 4.17  |
| chr3R | 19031522 | 19031932 | CG6013     | 188  | 14.1207 | 3.37  |
| chr3R | 19093513 | 19095809 | cdi        | 41   | 24.577  | 3.95  |
| chr3R | 19093513 | 19095809 | mRpL55     | 676  | 24.577  | 3.95  |
| chr3R | 19093513 | 19095809 | ATPsynD    | 770  | 24.577  | 3.95  |
| chr3R | 19147330 | 19148202 | Ppcs       | 44   | 15.5781 | 3.33  |
| chr3R | 19156402 | 19157095 | CG11779    | 55   | 25.041  | 4.55  |
| chr3R | 19161481 | 19162567 | Nsun5      | 191  | 19.5751 | 3.77  |
| chr3R | 19161481 | 19162567 | CG42359    | 191  | 19.5751 | 3.77  |
| chr3R | 19163826 | 19164948 | sqz        | 87   | 14.3728 | 3.60  |
| chr3R | 19211382 | 19212461 | cry        | 100  | 22.3363 | 4.05  |
| chr3R | 19246094 | 19246708 | unc79      | 363  | 41.2653 | 6.36  |
| chr3R | 19325985 | 19326339 | DI         | 37   | 12.9535 | 3.88  |
| chr3R | 19402779 | 19403746 | Ino80      | 36   | 17.0627 | 3.54  |
| chr3R | 19402779 | 19403746 | CG5316     | 337  | 17.0627 | 3.54  |
| chr3R | 19620947 | 19621228 | CG6231     | 42   | 15.4097 | 3.66  |
| chr3R | 19640946 | 19641631 | subdued    | 62   | 26.6451 | 4.29  |
| chr3R | 19642103 | 19644589 | subdued    | 1486 | 25.8329 | 4.58  |
| chr3R | 19642103 | 19644589 | Vha13      | 178  | 25.8329 | 4.58  |
| chr3R | 19645057 | 19645681 | Nup58      | 230  | 24.5074 | 4.68  |
| chr3R | 19647945 | 19648913 | CG6195     | 150  | 22.3101 | 4.18  |
| chr3R | 19647945 | 19648913 | CG31220    | 226  | 22.3101 | 4.18  |
| chr3R | 19860763 | 19862161 | Ire1       | 117  | 30.5252 | 5.00  |
| chr3R | 19860763 | 19862161 | CG11447    | 435  | 30.5252 | 5.00  |
| chr3R | 19875199 | 19875815 | CG4562     | 20   | 7.76419 | 3.08  |
| chr3R | 19879662 | 19880178 | Ask1       | 233  | 24.5074 | 4.68  |
| chr3R | 19902384 | 19903818 | CG4538     | 254  | 33.9599 | 5.34  |
| chr3R | 19904253 | 19906217 | Surf6      | 105  | 21.0887 | 4.06  |
| chr3R | 19904253 | 19906217 | RhoGAP92B  | 400  | 21.0887 | 4.06  |
| chr3R | 20008099 | 20009283 | Hs6st      | 98   | 44.9986 | 5.74  |
| chr3R | 20008099 | 20009283 | MED25      | 532  | 44.9986 | 5.74  |
| chr3R | 20020537 | 20021468 | CG4433     | 55   | 16.5152 | 4.40  |
| chr3R | 20021762 | 20022442 | psidin     | 263  | 19.6858 | 4.10  |
| chr3R | 20030749 | 20031401 | trem       | 251  | 15.0256 | 3.59  |
| chr3R | 20035590 | 20036288 | CG10889    | 23   | 25.8329 | 4.58  |
| chr3R | 20057091 | 20058145 | CG4390     | 166  | 17.9783 | 4.14  |
| chr3R | 20057091 | 20058145 | mdlc       | 423  | 17.9783 | 4.14  |
| chr3R | 20252559 | 20253986 | cic        | 109  | 32.3973 | 4.98  |
| chr3R | 20308973 | 20310711 | CG42668    | 244  | 22.5758 | 3.68  |
| chr3R | 20326846 | 20328150 | CG4360     | 191  | 106.518 | 10.11 |
| chr3R | 20549765 | 20551288 | Stat92E    | 62   | 35.6432 | 4.66  |
| chr3R | 20551576 | 20552493 | Stat92E    | 11   | 19.496  | 4.12  |
| chr3R | 20556217 | 20557888 | att-ORFA   | 917  | 45.4338 | 6.09  |
| chr3R | 20558159 | 20558588 | CG5180     | 8    | 14.2251 | 3.66  |
| chr3R | 20579364 | 20580492 | EloB       | 8    | 26.8997 | 4.56  |
| chr3R | 20579364 | 20580492 | Srp14      | 256  | 26.8997 | 4.56  |
| chr3R | 20585008 | 20585900 | CG16953    | 196  | 20.6165 | 4.28  |
| chr3R | 20587972 | 20588433 | CR46044    | 233  | 22.9408 | 4.10  |



|       |          |          |                    |      |         |      |
|-------|----------|----------|--------------------|------|---------|------|
| chr3R | 20587972 | 20588433 | 44076              | 121  | 22.9408 | 4.10 |
| chr3R | 20592982 | 20593463 | bon                | 166  | 28.3782 | 4.86 |
| chr3R | 20621782 | 20622833 | H                  | 257  | 18.4033 | 3.91 |
| chr3R | 20633962 | 20634754 | Pi3K92E            | 221  | 16.9389 | 3.73 |
| chr3R | 20635331 | 20636164 | Lrrk               | 153  | 16.8125 | 3.58 |
| chr3R | 20778558 | 20779116 | Syp                | 63   | 25.0925 | 4.22 |
| chr3R | 20783601 | 20785297 | Syp                | 1791 | 20.6607 | 3.78 |
| chr3R | 20818605 | 20819033 | CG17270            | 46   | 17.8922 | 3.61 |
| chr3R | 20821083 | 20822754 | CG17271            | 256  | 41.4484 | 5.97 |
| chr3R | 20821083 | 20822754 | RpS20              | 588  | 41.4484 | 5.97 |
| chr3R | 20821083 | 20822754 | snoRNA:Psi18S-1295 | 1017 | 41.4484 | 5.97 |
| chr3R | 20829766 | 20830780 | AdSS               | 280  | 23.824  | 3.92 |
| chr3R | 20832683 | 20833869 | Synd               | 206  | 37.592  | 5.71 |
| chr3R | 20850382 | 20851132 | RpS30              | 37   | 17.6365 | 3.81 |
| chr3R | 20948632 | 20950009 | Atpalpha           | 142  | 34.4586 | 5.91 |
| chr3R | 21102160 | 21102781 | CG5745             | 158  | 15.0256 | 3.59 |
| chr3R | 21108343 | 21108708 | rtet               | 55   | 19.2253 | 4.34 |
| chr3R | 21126480 | 21128158 | slmb               | 243  | 16.5514 | 3.80 |
| chr3R | 21126480 | 21128158 | CG5793             | 15   | 16.5514 | 3.80 |
| chr3R | 21155900 | 21156782 | SNF4Agamma         | 362  | 12.4735 | 3.53 |
| chr3R | 21188601 | 21189081 | SNF4Agamma         | 11   | 26.3346 | 4.20 |
| chr3R | 21204779 | 21205192 | SNF4Agamma         | 18   | 11.6615 | 3.34 |
| chr3R | 21215008 | 21215527 | CG5862             | 305  | 10.9098 | 3.27 |
| chr3R | 21223186 | 21224592 | CG3337             | 201  | 27.4289 | 4.50 |
| chr3R | 21223186 | 21224592 | Nelf-A             | 82   | 27.4289 | 4.50 |
| chr3R | 21223186 | 21224592 | CR44265            | 804  | 27.4289 | 4.50 |
| chr3R | 21268181 | 21270452 | Rab1               | 77   | 12.0279 | 3.02 |
| chr3R | 21268181 | 21270452 | AP-2sigma          | 1092 | 12.0279 | 3.02 |
| chr3R | 21268181 | 21270452 | CG5919             | 1142 | 12.0279 | 3.02 |
| chr3R | 21273216 | 21273915 | CG3308             | 378  | 12.817  | 3.13 |
| chr3R | 21296402 | 21298127 | Hsromega           | 67   | 39.0931 | 5.42 |
| chr3R | 21348536 | 21349766 | CG16791            | 40   | 30.4766 | 4.59 |
| chr3R | 21376267 | 21377510 | mod(mdg4)          | 52   | 23.0834 | 4.22 |
| chr3R | 21446406 | 21446951 | lbe                | 53   | 21.7452 | 4.44 |
| chr3R | 21520726 | 21521418 | CG7956             | 47   | 19.6885 | 4.26 |
| chr3R | 21618324 | 21620041 | InR                | 42   | 37.4501 | 5.03 |
| chr3R | 21662630 | 21662994 | CG6353             | 130  | 27.1573 | 5.42 |
| chr3R | 21948300 | 21949421 | Eip93F             | 275  | 12.8757 | 3.08 |
| chr3R | 22018630 | 22019428 | CG6439             | 138  | 26.0427 | 4.37 |
| chr3R | 22022427 | 22024120 | Mitofilin          | 180  | 46.6812 | 6.80 |
| chr3R | 22022427 | 22024120 | mRpL35             | 632  | 46.6812 | 6.80 |
| chr3R | 22033726 | 22034908 | CG45099            | 324  | 13.0517 | 3.33 |
| chr3R | 22033726 | 22034908 | CG6015             | 324  | 13.0517 | 3.33 |
| chr3R | 22033726 | 22034908 | pit                | 335  | 13.0517 | 3.33 |
| chr3R | 22033726 | 22034908 | Fadd               | 492  | 13.0517 | 3.33 |
| chr3R | 22035593 | 22036312 | pit                | 88   | 23.6489 | 5.03 |
| chr3R | 22356396 | 22357539 | Sar1               | 204  | 34.6583 | 5.23 |
| chr3R | 22361887 | 22363317 | PSR                | 13   | 23.2593 | 4.29 |
| chr3R | 22361887 | 22363317 | Muted              | 261  | 23.2593 | 4.29 |
| chr3R | 22361887 | 22363317 | CG7071             | 261  | 23.2593 | 4.29 |
| chr3R | 22361887 | 22363317 | Muted              | 538  | 23.2593 | 4.29 |
| chr3R | 22420351 | 22421637 | Nop56              | 159  | 27.2259 | 4.95 |
| chr3R | 22420351 | 22421637 | mats               | 251  | 27.2259 | 4.95 |
| chr3R | 22424452 | 22425000 | pinta              | 35   | 17.8061 | 3.80 |
| chr3R | 22461519 | 22462067 | Rpn7               | 199  | 16.4711 | 3.93 |
| chr3R | 22462479 | 22462883 | AP-2mu             | 190  | 13.0829 | 3.25 |

|       |          |          |               |       |         |      |
|-------|----------|----------|---------------|-------|---------|------|
| chr3R | 22487055 | 22487748 | CG7048        | 157   | 19.5363 | 3.36 |
| chr3R | 22490990 | 22491687 | T-cp1         | 175   | 15.5832 | 3.65 |
| chr3R | 22526671 | 22528730 | CG5346        | 189   | 15.882  | 3.86 |
| chr3R | 22539742 | 22540290 | CG5326        | 60    | 9.53515 | 3.17 |
| chr3R | 22539742 | 22540290 | CR45646       | 136   | 9.53515 | 3.17 |
| chr3R | 22587418 | 22587979 | Efa6          | 46    | 21.5761 | 3.81 |
| chr3R | 22666446 | 22667564 | wake          | 91    | 21.5802 | 4.41 |
| chr3R | 22685630 | 22687012 | Gclm          | 106   | 32.4667 | 5.27 |
| chr3R | 22685630 | 22687012 | CG17625       | 444   | 32.4667 | 5.27 |
| chr3R | 22689929 | 22691036 | wfs1          | 319   | 10.1335 | 3.32 |
| chr3R | 22689929 | 22691036 | Nup133        | 93    | 10.1335 | 3.32 |
| chr3R | 22725746 | 22726465 | CG4813        | 318   | 17.2061 | 4.09 |
| chr3R | 22726990 | 22727854 | CG45049       | 342   | 14.921  | 3.36 |
| chr3R | 23066316 | 23067448 | CG17111       | 89    | 11.3107 | 3.52 |
| chr3R | 23117293 | 23118113 | Rassf         | 64    | 16.9775 | 3.46 |
| chr3R | 23127175 | 23128118 | CG31457       | 205   | 10.9657 | 3.14 |
| chr3R | 23156796 | 23158145 | unk           | 514   | 32.1832 | 4.75 |
| chr3R | 23226014 | 23227482 | cnc           | 22    | 35.6818 | 5.71 |
| chr3R | 23257789 | 23258665 | wda           | 30    | 17.5761 | 4.00 |
| chr3R | 23257789 | 23258665 | CG13827       | 307   | 17.5761 | 4.00 |
| chr3R | 23356485 | 23357003 | Sec13         | 171   | 34.8581 | 6.07 |
| chr3R | 23358699 | 23359540 | RpS3          | 96    | 25.041  | 4.55 |
| chr3R | 23374308 | 23374831 | CG42828       | 761   | 10.4114 | 3.15 |
| chr3R | 23472133 | 23472683 | CG4374        | 165   | 10.6553 | 3.08 |
| chr3R | 23653829 | 23654571 | CG31145       | 15272 | 12.0224 | 3.53 |
| chr3R | 23669318 | 23670159 | CG31145       | 41    | 15.5487 | 3.47 |
| chr3R | 23686164 | 23687054 | SPE           | 66    | 17.72   | 3.93 |
| chr3R | 23723174 | 23724078 | CG10365       | 60    | 19.3567 | 3.69 |
| chr3R | 23732350 | 23733552 | Rpn9          | 36    | 17.835  | 4.05 |
| chr3R | 23732350 | 23733552 | Hmgcr         | 348   | 17.835  | 4.05 |
| chr3R | 23732350 | 23733552 | Rpn9          | 487   | 17.835  | 4.05 |
| chr3R | 23752183 | 23753305 | RanBP3        | 20    | 11.1508 | 3.14 |
| chr3R | 23752183 | 23753305 | Rpt5          | 61    | 11.1508 | 3.14 |
| chr3R | 23780819 | 23783065 | Nup98-96      | 219   | 37.9264 | 5.14 |
| chr3R | 23780819 | 23783065 | mbc           | 76    | 37.9264 | 5.14 |
| chr3R | 23818922 | 23819403 | CG33111       | 152   | 18.6618 | 3.74 |
| chr3R | 23818922 | 23819403 | eIF4G2        | 152   | 18.6618 | 3.74 |
| chr3R | 23818922 | 23819403 | CG33111       | 152   | 18.6618 | 3.74 |
| chr3R | 23859294 | 23859809 | snRNA:U1:21D  | 108   | 65.4163 | 7.57 |
| chr3R | 23859294 | 23859809 | snRNA:U1:95Cb | 108   | 65.4163 | 7.57 |
| chr3R | 23859294 | 23859809 | snRNA:U1:95Ca | 108   | 65.4163 | 7.57 |
| chr3R | 23890528 | 23891198 | TfIIA-S       | 125   | 18.5546 | 3.84 |
| chr3R | 23921959 | 23923231 | sba           | 18    | 26.4216 | 3.99 |
| chr3R | 23927220 | 23927688 | CG13601       | 111   | 15.5832 | 3.65 |
| chr3R | 23933773 | 23934740 | CG5854        | 283   | 25.2747 | 4.09 |
| chr3R | 23942546 | 23943317 | Gdh           | 38    | 31.9098 | 4.27 |
| chr3R | 23957686 | 23959312 | Aats-glupro   | 147   | 30.4474 | 5.04 |
| chr3R | 23957686 | 23959312 | AP-1sigma     | 406   | 30.4474 | 5.04 |
| chr3R | 23986246 | 23987388 | CG13603       | 270   | 46.919  | 6.54 |
| chr3R | 23986246 | 23987388 | CG5902        | 198   | 46.919  | 6.54 |
| chr3R | 23992268 | 23994121 | CG13604       | 317   | 26.7628 | 4.58 |
| chr3R | 23992268 | 23994121 | Rab7          | 55    | 26.7628 | 4.58 |
| chr3R | 24008097 | 24008388 | KrT95D        | 1734  | 7.68125 | 3.06 |
| chr3R | 24031125 | 24032618 | KrT95D        | 101   | 35.8963 | 5.10 |
| chr3R | 24031125 | 24032618 | Ime4          | 430   | 35.8963 | 5.10 |
| chr3R | 24036995 | 24039376 | Miro          | 180   | 37.4926 | 5.97 |

|       |          |          |              |      |         |      |
|-------|----------|----------|--------------|------|---------|------|
| chr3R | 24036995 | 24039376 | spas         | 664  | 37.4926 | 5.97 |
| chr3R | 24036995 | 24039376 | Miro         | 1297 | 37.4926 | 5.97 |
| chr3R | 24046622 | 24048648 | Rox8         | 117  | 24.4639 | 4.30 |
| chr3R | 24046622 | 24048648 | CG5986       | 185  | 24.4639 | 4.30 |
| chr3R | 24046622 | 24048648 | Rox8         | 386  | 24.4639 | 4.30 |
| chr3R | 24046622 | 24048648 | CG5986       | 693  | 24.4639 | 4.30 |
| chr3R | 24105028 | 24106492 | Syx1A        | 37   | 22.7821 | 4.12 |
| chr3R | 24108388 | 24109719 | 4EHP         | 437  | 12.0756 | 3.13 |
| chr3R | 24108388 | 24109719 | CG18428      | 31   | 12.0756 | 3.13 |
| chr3R | 24152281 | 24152936 | p38a         | 160  | 19.7277 | 3.96 |
| chr3R | 24152281 | 24152936 | CG6178       | 135  | 19.7277 | 3.96 |
| chr3R | 24163153 | 24163600 | mRpS24       | 180  | 31.8322 | 5.70 |
| chr3R | 24169070 | 24169687 | CG5510       | 74   | 17.8941 | 3.40 |
| chr3R | 24218354 | 24218925 | CG17786      | 15   | 15.2599 | 3.78 |
| chr3R | 24230424 | 24231516 | mask         | 213  | 22.4665 | 4.16 |
| chr3R | 24230424 | 24231516 | CR44092      | 411  | 22.4665 | 4.16 |
| chr3R | 24230424 | 24231516 | CR45217      | 590  | 22.4665 | 4.16 |
| chr3R | 24252309 | 24252817 | beta-PheRS   | 75   | 16.6352 | 3.91 |
| chr3R | 24270947 | 24271444 | jar          | 61   | 16.6352 | 3.59 |
| chr3R | 24272649 | 24273288 | Orct2        | 40   | 11.1508 | 3.14 |
| chr3R | 24289892 | 24290602 | CG6364       | 170  | 17.5816 | 3.76 |
| chr3R | 24294866 | 24295882 | crb          | 17   | 21.6471 | 3.90 |
| chr3R | 24318969 | 24319988 | BRWD3        | 176  | 22.8258 | 4.00 |
| chr3R | 24318969 | 24319988 | CR46093      | 607  | 22.8258 | 4.00 |
| chr3R | 24332790 | 24333590 | CG5728       | 23   | 21.8156 | 3.88 |
| chr3R | 24332790 | 24333590 | Dis3         | 139  | 21.8156 | 3.88 |
| chr3R | 24348204 | 24349606 | CG5746       | 85   | 33.096  | 5.38 |
| chr3R | 24348204 | 24349606 | CG6454       | 475  | 33.096  | 5.38 |
| chr3R | 24357495 | 24358002 | Golgin84     | 216  | 11.2415 | 3.39 |
| chr3R | 24359836 | 24360287 | CG18528      | 65   | 9.91295 | 3.07 |
| chr3R | 24518186 | 24518998 | Pp1alpha-96A | 211  | 24.9643 | 4.39 |
| chr3R | 24528021 | 24528545 | CG6607       | 85   | 10.9184 | 3.22 |
| chr3R | 24542994 | 24544055 | CG5789       | 54   | 81.3599 | 8.80 |
| chr3R | 24581899 | 24582989 | REPTOR       | 72   | 13.889  | 3.03 |
| chr3R | 24584736 | 24586884 | CG13625      | 1526 | 15.8772 | 3.76 |
| chr3R | 24584736 | 24586884 | mld          | 1034 | 15.8772 | 3.76 |
| chr3R | 24625065 | 24626320 | Syx18        | 330  | 21.2353 | 3.83 |
| chr3R | 24625065 | 24626320 | atl          | 222  | 21.2353 | 3.83 |
| chr3R | 24629728 | 24630935 | Wsck         | 230  | 27.5782 | 4.83 |
| chr3R | 24629728 | 24630935 | atl          | 15   | 27.5782 | 4.83 |
| chr3R | 24649221 | 24651803 | puf          | 290  | 21.8736 | 4.35 |
| chr3R | 24649221 | 24651803 | ash2         | 209  | 21.8736 | 4.35 |
| chr3R | 24654592 | 24655489 | CG31125      | 379  | 15.1903 | 3.49 |
| chr3R | 24654592 | 24655489 | CG6695       | 40   | 15.1903 | 3.49 |
| chr3R | 24718933 | 24720327 | CG13630      | 748  | 10.744  | 3.06 |
| chr3R | 24718933 | 24720327 | tok          | 56   | 10.744  | 3.06 |
| chr3R | 24786676 | 24787563 | CG5805       | 60   | 28.4819 | 4.61 |
| chr3R | 24799152 | 24800158 | Ude          | 69   | 18.3864 | 3.86 |
| chr3R | 24804966 | 24805344 | polybromo    | 75   | 17.5761 | 4.00 |
| chr3R | 24813356 | 24814557 | CG5807       | 100  | 23.5522 | 4.16 |
| chr3R | 24813356 | 24814557 | CG34150      | 349  | 23.5522 | 4.16 |
| chr3R | 24817468 | 24818012 | Saf-B        | 212  | 21.3964 | 4.32 |
| chr3R | 24860211 | 24860623 | CG13639      | 31   | 9.91295 | 3.07 |
| chr3R | 24875964 | 24877558 | CG3744       | 314  | 26.4777 | 4.81 |
| chr3R | 24875964 | 24877558 | CG31381      | 704  | 26.4777 | 4.81 |
| chr3R | 24875964 | 24877558 | CG11089      | 704  | 26.4777 | 4.81 |

|       |          |          |                 |     |         |      |
|-------|----------|----------|-----------------|-----|---------|------|
| chr3R | 24875964 | 24877558 | CG31381         | 704 | 26.4777 | 4.81 |
| chr3R | 24917306 | 24918786 | sud1            | 97  | 18.2908 | 4.15 |
| chr3R | 24917306 | 24918786 | PIG-S           | 97  | 18.2908 | 4.15 |
| chr3R | 24917306 | 24918786 | CG11168         | 338 | 18.2908 | 4.15 |
| chr3R | 24931989 | 24932454 | CG11771         | 171 | 21.8876 | 4.41 |
| chr3R | 24937694 | 24938405 | Osbp            | 44  | 20.2001 | 4.77 |
| chr3R | 24944380 | 24945709 | ssh             | 242 | 30.0685 | 4.67 |
| chr3R | 24944380 | 24945709 | Nmnat           | 522 | 30.0685 | 4.67 |
| chr3R | 25024587 | 25025775 | CG11781         | 445 | 25.041  | 4.55 |
| chr3R | 25024587 | 25025775 | Hr96            | 228 | 25.041  | 4.55 |
| chr3R | 25032859 | 25033600 | Smg6            | 185 | 21.8156 | 3.88 |
| chr3R | 25038179 | 25039669 | CG6422          | 159 | 15.5555 | 3.40 |
| chr3R | 25038179 | 25039669 | bai             | 35  | 15.5555 | 3.40 |
| chr3R | 25047678 | 25048171 | CG11790         | 125 | 15.635  | 3.76 |
| chr3R | 25069285 | 25070048 | OstStt3         | 256 | 9.35909 | 3.03 |
| chr3R | 25069285 | 25070048 | CG11839         | 545 | 9.35909 | 3.03 |
| chr3R | 25122443 | 25123028 | CG31108         | 121 | 30.0324 | 5.21 |
| chr3R | 25122443 | 25123028 | CG31510         | 121 | 30.0324 | 5.21 |
| chr3R | 25123350 | 25124238 | vig2            | 42  | 20.1448 | 4.19 |
| chr3R | 25219195 | 25220004 | CG31103         | 85  | 21.5451 | 4.65 |
| chr3R | 25246999 | 25247636 | RpS27           | 228 | 18.4241 | 3.58 |
| chr3R | 25249242 | 25250014 | Nup358          | 478 | 14.1332 | 3.30 |
| chr3R | 25258230 | 25259714 | CG11857         | 271 | 30.4474 | 5.04 |
| chr3R | 25265130 | 25266349 | Aats-gln        | 127 | 27.8259 | 4.76 |
| chr3R | 25265130 | 25266349 | RIOK2           | 5   | 27.8259 | 4.76 |
| chr3R | 25292701 | 25293024 | CG31098         | 160 | 10.7814 | 3.14 |
| chr3R | 25308231 | 25308510 | CG10550         | 7   | 20.5506 | 4.32 |
| chr3R | 25472772 | 25474092 | Fur1            | 56  | 26.5254 | 4.07 |
| chr3R | 25472772 | 25474092 | Vps33B          | 487 | 26.5254 | 4.07 |
| chr3R | 25482124 | 25483720 | XNP             | 82  | 40.8563 | 5.75 |
| chr3R | 25482124 | 25483720 | CG42488         | 437 | 40.8563 | 5.75 |
| chr3R | 25482124 | 25483720 | CG5116          | 437 | 40.8563 | 5.75 |
| chr3R | 25489969 | 25491056 | Dhap-at         | 171 | 12.3502 | 3.27 |
| chr3R | 25624087 | 25624814 | Npl4            | 80  | 12.3116 | 3.30 |
| chr3R | 25646858 | 25647584 | jigr1           | 123 | 14.2008 | 3.35 |
| chr3R | 25660778 | 25661423 | Tnks            | 3   | 11.1508 | 3.14 |
| chr3R | 25661690 | 25662957 | RASSF8          | 137 | 34.0553 | 4.79 |
| chr3R | 25661690 | 25662957 | CR45208         | 732 | 34.0553 | 4.79 |
| chr3R | 25680232 | 25681306 | CG4743          | 337 | 14.3293 | 3.30 |
| chr3R | 25680232 | 25681306 | CG5028          | 43  | 14.3293 | 3.30 |
| chr3R | 25684721 | 25685217 | RpL27           | 87  | 26.3903 | 4.47 |
| chr3R | 25740243 | 25740614 | LpR2            | 46  | 18.0528 | 3.89 |
| chr3R | 25880823 | 25881504 | Tsp96F          | 207 | 14.1853 | 3.56 |
| chr3R | 25888291 | 25889184 | Lnk             | 214 | 17.6476 | 3.86 |
| chr3R | 25982838 | 25983754 | Nf1             | 363 | 30.9988 | 4.67 |
| chr3R | 26005771 | 26006721 | E(spl)mbeta-HLH | 80  | 10.3353 | 3.01 |
| chr3R | 26041527 | 26043348 | gro             | 124 | 50.3757 | 6.05 |
| chr3R | 26051904 | 26052334 | Exo84           | 71  | 13.0829 | 3.25 |
| chr3R | 26052641 | 26053404 | Vps2            | 152 | 26.9372 | 5.15 |
| chr3R | 26054682 | 26055622 | Dak1            | 36  | 33.6772 | 5.13 |
| chr3R | 26058472 | 26059953 | RpL34a          | 280 | 10.5404 | 3.01 |
| chr3R | 26058472 | 26059953 | CG14544         | 508 | 10.5404 | 3.01 |
| chr3R | 26106637 | 26107155 | CG31324         | 4   | 33.6187 | 5.41 |
| chr3R | 26188262 | 26189007 | CG6073          | 134 | 53.7841 | 6.80 |
| chr3R | 26261053 | 26261668 | Ald             | 59  | 23.0896 | 4.08 |
| chr3R | 26452514 | 26453039 | CG5447          | 189 | 23.6737 | 4.70 |

|       |          |          |             |     |         |      |
|-------|----------|----------|-------------|-----|---------|------|
| chr3R | 26536152 | 26536986 | scrib       | 130 | 32.3288 | 4.77 |
| chr3R | 26717863 | 26718393 | CG5484      | 241 | 18.8066 | 3.94 |
| chr3R | 26798928 | 26800110 | TI          | 68  | 15.3751 | 3.41 |
| chr3R | 26866282 | 26867662 | ball        | 317 | 25.5629 | 4.49 |
| chr3R | 26866282 | 26867662 | His2Av      | 196 | 25.5629 | 4.49 |
| chr3R | 26875174 | 26876889 | Rb97D       | 70  | 24.818  | 4.41 |
| chr3R | 26875174 | 26876889 | ms(3)K81    | 179 | 24.818  | 4.41 |
| chr3R | 26875174 | 26876889 | CG5500      | 957 | 24.818  | 4.41 |
| chr3R | 26881143 | 26882091 | ro          | 542 | 18.7233 | 3.83 |
| chr3R | 26881143 | 26882091 | T48         | 20  | 18.7233 | 3.83 |
| chr3R | 26912273 | 26912985 | Ets97D      | 51  | 28.7166 | 5.44 |
| chr3R | 26966842 | 26967382 | CG5521      | 203 | 31.5922 | 4.96 |
| chr3R | 26988266 | 26988864 | CG31075     | 40  | 50.7049 | 7.65 |
| chr3R | 27069762 | 27070364 | spz         | 43  | 17.5391 | 4.29 |
| chr3R | 27094362 | 27094884 | CG14259     | 101 | 27.7617 | 5.64 |
| chr3R | 27111655 | 27112876 | gb          | 177 | 29.6402 | 5.02 |
| chr3R | 27111655 | 27112876 | CG5815      | 472 | 29.6402 | 5.02 |
| chr3R | 27149802 | 27151249 | CG6051      | 118 | 41.6892 | 5.88 |
| chr3R | 27151535 | 27152303 | Men-b       | 52  | 21.6959 | 4.27 |
| chr3R | 27244482 | 27245811 | CG18766     | 92  | 27.6913 | 4.59 |
| chr3R | 27244482 | 27245811 | CR46085     | 606 | 27.6913 | 4.59 |
| chr3R | 27263280 | 27264220 | woc         | 214 | 33.317  | 4.97 |
| chr3R | 27272298 | 27273985 | l(3)mbt     | 436 | 14.1036 | 3.59 |
| chr3R | 27272298 | 27273985 | CG5934      | 5   | 14.1036 | 3.59 |
| chr3R | 27274516 | 27275769 | CG5938      | 165 | 19.3567 | 3.69 |
| chr3R | 27283703 | 27284336 | CG3368      | 140 | 18.7614 | 4.08 |
| chr3R | 27287686 | 27289188 | bigmax      | 150 | 56.9171 | 7.63 |
| chr3R | 27287686 | 27289188 | Hmu         | 392 | 56.9171 | 7.63 |
| chr3R | 27580052 | 27582322 | wdb         | 114 | 17.3643 | 3.64 |
| chr3R | 27582883 | 27583422 | pins        | 324 | 11.1508 | 3.14 |
| chr3R | 27635630 | 27636891 | CG5611      | 48  | 21.6914 | 4.49 |
| chr3R | 27635630 | 27636891 | Mtl         | 303 | 21.6914 | 4.49 |
| chr3R | 27662338 | 27663462 | unc80       | 632 | 11.2968 | 3.35 |
| chr3R | 27677178 | 27678044 | CG5590      | 237 | 15.9094 | 3.81 |
| chr3R | 27699601 | 27700920 | ALiX        | 253 | 20.2246 | 3.91 |
| chr3R | 27699601 | 27700920 | btz         | 503 | 20.2246 | 3.91 |
| chr3R | 27916113 | 27916568 | CG5003      | 177 | 16.4597 | 3.60 |
| chr3R | 27916865 | 27917362 | mRpS22      | 148 | 25.5021 | 4.93 |
| chr3R | 27920561 | 27921088 | CG12259     | 144 | 20.4017 | 4.47 |
| chr3R | 27921930 | 27922348 | BCAS2       | 137 | 9.45755 | 3.10 |
| chr3R | 27922700 | 27923498 | RpL4        | 172 | 36.1072 | 5.59 |
| chr3R | 27924472 | 27925859 | mino        | 40  | 23.5836 | 4.68 |
| chr3R | 27924472 | 27925859 | CR45566     | 138 | 23.5836 | 4.68 |
| chr3R | 27924472 | 27925859 | mino        | 434 | 23.5836 | 4.68 |
| chr3R | 27937281 | 27938165 | Mes-4       | 10  | 15.0256 | 3.59 |
| chr3R | 27938519 | 27939208 | CG5514      | 206 | 23.7459 | 4.43 |
| chr3R | 27947256 | 27948156 | mfrn        | 182 | 27.811  | 5.06 |
| chr3R | 27948570 | 27949261 | Gp93        | 73  | 57.6144 | 7.12 |
| chr3R | 27987580 | 27988487 | betaTub97EF | 33  | 26.6968 | 5.17 |
| chr3R | 28325942 | 28326873 | larp        | 22  | 21.7979 | 4.57 |
| chr3R | 28335028 | 28336651 | larp        | 243 | 33.5549 | 4.90 |
| chr3R | 28339551 | 28339935 | Gfat2       | 22  | 17.6365 | 3.81 |
| chr3R | 28340306 | 28340903 | Moca-cyp    | 186 | 31.4025 | 4.77 |
| chr3R | 28340306 | 28340903 | CR46105     | 281 | 31.4025 | 4.77 |
| chr3R | 28544465 | 28544911 | CG12413     | 149 | 22.3903 | 4.40 |
| chr3R | 28598818 | 28599292 | Noa36       | 184 | 14.4223 | 3.18 |

|       |          |          |              |      |         |      |
|-------|----------|----------|--------------|------|---------|------|
| chr3R | 28599760 | 28601050 | Hrb98DE      | 32   | 19.7277 | 3.96 |
| chr3R | 28681950 | 28682625 | CG9990       | 37   | 14.3026 | 3.37 |
| chr3R | 28810788 | 28811455 | wdn          | 166  | 46.1965 | 7.13 |
| chr3R | 28812021 | 28812792 | CG1646       | 88   | 28.9394 | 5.02 |
| chr3R | 28812021 | 28812792 | snoRNA:291   | 315  | 28.9394 | 5.02 |
| chr3R | 28831237 | 28832188 | WASp         | 240  | 23.4475 | 4.43 |
| chr3R | 28844258 | 28845557 | Apc          | 562  | 14.9783 | 3.17 |
| chr3R | 28844258 | 28845557 | spg          | 11   | 14.9783 | 3.17 |
| chr3R | 28858666 | 28859391 | Inx3         | 64   | 16.4597 | 3.60 |
| chr3R | 28887464 | 28889825 | CG33203      | 1573 | 15.5094 | 3.29 |
| chr3R | 28887464 | 28889825 | Doa          | 262  | 15.5094 | 3.29 |
| chr3R | 28891605 | 28892122 | Doa          | 21   | 14.1207 | 3.37 |
| chr3R | 29038487 | 29040504 | Slu7         | 130  | 22.7821 | 4.12 |
| chr3R | 29038487 | 29040504 | Pkc98E       | 46   | 22.7821 | 4.12 |
| chr3R | 29062653 | 29063391 | Cul5         | 160  | 18.069  | 3.60 |
| chr3R | 29062653 | 29063391 | CG11873      | 96   | 18.069  | 3.60 |
| chr3R | 29063655 | 29065090 | CG11873      | 120  | 35.8037 | 5.30 |
| chr3R | 29112297 | 29113686 | alpha-Man-Ib | 533  | 31.4096 | 5.15 |
| chr3R | 29112297 | 29113686 | CG11876      | 148  | 31.4096 | 5.15 |
| chr3R | 29115958 | 29116805 | Atg14        | 115  | 11.4905 | 3.30 |
| chr3R | 29122320 | 29123677 | yem          | 462  | 15.8437 | 3.85 |
| chr3R | 29122320 | 29123677 | CG11880      | 28   | 15.8437 | 3.85 |
| chr3R | 29131227 | 29131947 | Vha100-1     | 134  | 15.466  | 3.77 |
| chr3R | 29138084 | 29139156 | CG14512      | 71   | 22.4096 | 4.77 |
| chr3R | 29138084 | 29139156 | CG14516      | 17   | 22.4096 | 4.77 |
| chr3R | 29146530 | 29146991 | CG14511      | 15   | 12.1149 | 3.35 |
| chr3R | 29147729 | 29148608 | CG11882      | 235  | 30.0867 | 5.16 |
| chr3R | 29147729 | 29148608 | Pglym78      | 46   | 30.0867 | 5.16 |
| chr3R | 29152885 | 29154064 | Slbp         | 21   | 19.2127 | 4.01 |
| chr3R | 29152885 | 29154064 | Rpn2         | 278  | 19.2127 | 4.01 |
| chr3R | 29157730 | 29158637 | CG11897      | 43   | 27.0376 | 4.91 |
| chr3R | 29199883 | 29200872 | CG11899      | 74   | 34.2059 | 5.16 |
| chr3R | 29214360 | 29215403 | CR31044      | 26   | 19.6243 | 3.86 |
| chr3R | 29219971 | 29220645 | Ef1gamma     | 4    | 20.5596 | 3.89 |
| chr3R | 29222998 | 29224074 | Cisd2        | 147  | 28.5642 | 5.57 |
| chr3R | 29222998 | 29224074 | Brd8         | 91   | 28.5642 | 5.57 |
| chr3R | 29229050 | 29230162 | Usp1         | 0    | 13.5778 | 3.39 |
| chr3R | 29318703 | 29319677 | Cnx99A       | 174  | 19.5751 | 3.77 |
| chr3R | 29478901 | 29479944 | Ptp99A       | 159  | 13.4959 | 3.66 |
| chr3R | 29490614 | 29491222 | Spase12      | 97   | 19.3727 | 4.14 |
| chr3R | 29493129 | 29493672 | CG2310       | 139  | 29.8651 | 4.95 |
| chr3R | 29503103 | 29504010 | Trc8         | 241  | 13.2973 | 3.33 |
| chr3R | 29591725 | 29592646 | alph         | 374  | 18.5546 | 3.84 |
| chr3R | 29723105 | 29723803 | Pcd          | 337  | 21.6959 | 4.12 |
| chr3R | 29724508 | 29727115 | CG7593       | 918  | 19.402  | 4.00 |
| chr3R | 29724508 | 29727115 | CG18731      | 842  | 19.402  | 4.00 |
| chr3R | 29724508 | 29727115 | Kul          | 39   | 19.402  | 4.00 |
| chr3R | 29736428 | 29737203 | CG7601       | 55   | 23.4087 | 4.71 |
| chr3R | 29736428 | 29737203 | CIA30        | 274  | 23.4087 | 4.71 |
| chr3R | 29744876 | 29745671 | CG7609       | 271  | 22.6849 | 4.34 |
| chr3R | 29744876 | 29745671 | IntS11       | 27   | 22.6849 | 4.34 |
| chr3R | 29748199 | 29749827 | ATPsyngamma  | 197  | 42.2628 | 5.97 |
| chr3R | 29748199 | 29749827 | yata         | 142  | 42.2628 | 5.97 |
| chr3R | 29772838 | 29774398 | kay          | 259  | 25.7065 | 4.46 |
| chr3R | 29782533 | 29783044 | kay          | 71   | 13.7274 | 3.22 |
| chr3R | 29798974 | 29800216 | CG7837       | 118  | 19.0787 | 4.04 |

|       |          |          |             |       |         |      |
|-------|----------|----------|-------------|-------|---------|------|
| chr3R | 29798974 | 29800216 | Drice       | 421   | 19.0787 | 4.04 |
| chr3R | 29802315 | 29803633 | CG7834      | 5     | 22.4147 | 4.35 |
| chr3R | 29802315 | 29803633 | CG7789      | 346   | 22.4147 | 4.35 |
| chr3R | 29806516 | 29807934 | ncd         | 359   | 20.525  | 4.37 |
| chr3R | 29806516 | 29807934 | ca          | 296   | 20.525  | 4.37 |
| chr3R | 29806516 | 29807934 | ncd         | 21    | 20.525  | 4.37 |
| chr3R | 29806516 | 29807934 | ca          | 131   | 20.525  | 4.37 |
| chr3R | 29834598 | 29835154 | Atg16       | 181   | 34.6005 | 4.86 |
| chr3R | 29841451 | 29841861 | Cad99C      | 39    | 14.8243 | 3.59 |
| chr3R | 29856980 | 29857551 | dgt1        | 203   | 20.8122 | 4.16 |
| chr3R | 29859696 | 29862407 | CG15514     | 534   | 32.3734 | 5.32 |
| chr3R | 29859696 | 29862407 | RpS8        | 132   | 32.3734 | 5.32 |
| chr3R | 29868587 | 29869826 | Zip99C      | 145   | 22.9272 | 4.10 |
| chr3R | 29868587 | 29869826 | CG34133     | 614   | 22.9272 | 4.10 |
| chr3R | 29876868 | 29877493 | CG31038     | 44    | 23.4245 | 4.05 |
| chr3R | 29934738 | 29936326 | eIF2B-alpha | 80    | 14.6662 | 3.36 |
| chr3R | 29934738 | 29936326 | CG15523     | 169   | 14.6662 | 3.36 |
| chr3R | 29997144 | 29998408 | CG15525     | 362   | 17.4005 | 4.26 |
| chr3R | 29997144 | 29998408 | CG11504     | 139   | 17.4005 | 4.26 |
| chr3R | 30004182 | 30005543 | Nph         | 25    | 18.7624 | 4.25 |
| chr3R | 30004182 | 30005543 | Nlp         | 110   | 18.7624 | 4.25 |
| chr3R | 30004182 | 30005543 | Nph         | 187   | 18.7624 | 4.25 |
| chr3R | 30004182 | 30005543 | Nlp         | 276   | 18.7624 | 4.25 |
| chr3R | 30014546 | 30015539 | CG7920      | 52    | 20.267  | 3.72 |
| chr3R | 30021605 | 30023538 | Mgat2       | 525   | 28.1955 | 4.77 |
| chr3R | 30021605 | 30023538 | RpS28a      | 98    | 28.1955 | 4.77 |
| chr3R | 30021605 | 30023538 | Axn         | 95    | 28.1955 | 4.77 |
| chr3R | 30039359 | 30040158 | janA        | 195   | 11.8019 | 3.28 |
| chr3R | 30039359 | 30040158 | Sry-beta    | 10    | 11.8019 | 3.28 |
| chr3R | 30039359 | 30040158 | Sry-alpha   | 10    | 11.8019 | 3.28 |
| chr3R | 30043205 | 30044005 | Sry-delta   | 185   | 42.6243 | 5.67 |
| chr3R | 30045485 | 30047502 | RpL32       | 23    | 36.614  | 5.31 |
| chr3R | 30045485 | 30047502 | CG7943      | 352   | 36.614  | 5.31 |
| chr3R | 30052482 | 30053150 | CG7946      | 199   | 21.5849 | 4.20 |
| chr3R | 30056817 | 30057371 | CG34317     | 189   | 12.8577 | 3.42 |
| chr3R | 30056817 | 30057371 | CG7950      | 189   | 12.8577 | 3.42 |
| chr3R | 30325806 | 30326094 | CG34300     | 19301 | 7.81828 | 3.22 |
| chr3R | 30386766 | 30389254 | Fer1HCH     | 562   | 27.6128 | 4.07 |
| chr3R | 30386766 | 30389254 | Fer2LCH     | 765   | 27.6128 | 4.07 |
| chr3R | 30386766 | 30389254 | Fer1HCH     | 822   | 27.6128 | 4.07 |
| chr3R | 30386766 | 30389254 | Fer2LCH     | 1237  | 27.6128 | 4.07 |
| chr3R | 30423471 | 30424383 | CG15535     | 198   | 11.1508 | 3.14 |
| chr3R | 30423471 | 30424383 | mRpS18C     | 242   | 11.1508 | 3.14 |
| chr3R | 30563131 | 30563622 | tmod        | 208   | 26.9969 | 4.73 |
| chr3R | 30805671 | 30806759 | wtS         | 209   | 15.733  | 3.55 |
| chr3R | 30808347 | 30809235 | cindr       | 12    | 23.2622 | 4.07 |
| chr3R | 30888000 | 30889129 | Sap-r       | 47    | 22.9408 | 4.10 |
| chr3R | 31213169 | 31213869 | Zwilch      | 131   | 11.3423 | 3.22 |
| chr3R | 31213169 | 31213869 | CG1542      | 50    | 11.3423 | 3.22 |
| chr3R | 31215487 | 31216102 | CG15561     | 222   | 11.7057 | 3.14 |
| chr3R | 31218301 | 31219865 | ATPsynC     | 448   | 62.4217 | 6.70 |
| chr3R | 31218301 | 31219865 | mir-4949    | 127   | 62.4217 | 6.70 |
| chr3R | 31218301 | 31219865 | ATPsynC     | 60    | 62.4217 | 6.70 |
| chr3R | 31220894 | 31222919 | CG12054     | 1244  | 44.9501 | 6.14 |
| chr3R | 31254764 | 31255510 | CG1750      | 367   | 12.8391 | 3.56 |
| chr3R | 31254764 | 31255510 | spn-F       | 141   | 12.8391 | 3.56 |

|       |          |          |          |      |         |      |
|-------|----------|----------|----------|------|---------|------|
| chr3R | 31384157 | 31384690 | CG1607   | 41   | 30.8453 | 5.23 |
| chr3R | 31404197 | 31405797 | CG11337  | 597  | 18.8304 | 3.99 |
| chr3R | 31404197 | 31405797 | Gprk2    | 93   | 18.8304 | 3.99 |
| chr3R | 31404197 | 31405797 | CG11337  | 115  | 18.8304 | 3.99 |
| chr3R | 31572091 | 31572459 | gammaCOP | 117  | 9.42371 | 3.00 |
| chr3R | 31595567 | 31596330 | RpL6     | 148  | 46.6345 | 5.75 |
| chr3R | 31609438 | 31610012 | CycG     | 41   | 19.9791 | 3.83 |
| chr3R | 31610342 | 31611805 | CycG     | 64   | 30.5858 | 4.75 |
| chr3R | 31610342 | 31611805 | Med      | 131  | 30.5858 | 4.75 |
| chr3R | 31736489 | 31737300 | CstF-50  | 174  | 18.1467 | 3.77 |
| chr3R | 31736489 | 31737300 | CG11563  | 245  | 18.1467 | 3.77 |
| chr3R | 31743298 | 31744664 | CG1890   | 231  | 10.6553 | 3.08 |
| chr3R | 31743298 | 31744664 | CG1896   | 561  | 10.6553 | 3.08 |
| chr3R | 31745359 | 31746401 | awd      | 50   | 50.17   | 6.44 |
| chr3R | 31746926 | 31748796 | nero     | 796  | 33.5913 | 5.22 |
| chr3R | 31746926 | 31748796 | CG1910   | 204  | 33.5913 | 5.22 |
| chr3R | 31776932 | 31778362 | faf      | 58   | 39.676  | 6.22 |
| chr3R | 31793333 | 31794877 | CG2118   | 248  | 14.3026 | 3.37 |
| chr3R | 31793333 | 31794877 | Acf      | 175  | 14.3026 | 3.37 |
| chr3R | 31811792 | 31812293 | FeCH     | 43   | 17.1427 | 4.02 |
| chr3R | 32051237 | 32052058 | krz      | 116  | 30.659  | 5.33 |
| chr3R | 32052567 | 32053070 | mod      | 159  | 40.9227 | 5.70 |
| chr3R | 32067950 | 32068677 | Map205   | 58   | 14.1138 | 3.13 |
| chr4  | 313289   | 313922   | Zip102B  | 164  | 13.2179 | 3.49 |
| chr4  | 507758   | 508843   | zfh2     | 6882 | 19.7502 | 4.46 |
| chr4  | 570367   | 570786   | ND-49    | 191  | 13.4156 | 3.59 |
| chr4  | 671098   | 671461   | CG11360  | 145  | 12.5105 | 3.54 |
| chr4  | 1030502  | 1030927  | CG11076  | 254  | 20.6511 | 3.99 |
| chrX  | 245550   | 246293   | CG3038   | 106  | 10.941  | 3.32 |
| chrX  | 245550   | 246293   | G9a      | 15   | 10.941  | 3.32 |
| chrX  | 492733   | 494077   | CG17896  | 52   | 25.6291 | 5.03 |
| chrX  | 499863   | 500271   | svr      | 52   | 11.0265 | 3.08 |
| chrX  | 522057   | 523675   | elav     | 94   | 11.1149 | 3.36 |
| chrX  | 529470   | 530246   | CG4293   | 178  | 31.964  | 5.58 |
| chrX  | 620671   | 621889   | CG13365  | 96   | 29.7833 | 5.83 |
| chrX  | 620671   | 621889   | mod(r)   | 410  | 29.7833 | 5.83 |
| chrX  | 625603   | 625909   | CG17829  | 192  | 9.55894 | 3.28 |
| chrX  | 628900   | 630024   | RpL36    | 83   | 29.1703 | 4.94 |
| chrX  | 628900   | 630024   | l(1)1Bi  | 439  | 29.1703 | 4.94 |
| chrX  | 647161   | 647781   | Roc1a    | 176  | 15.191  | 4.06 |
| chrX  | 653847   | 656682   | Hmt4-20  | 538  | 17.0146 | 3.66 |
| chrX  | 653847   | 656682   | SkpA     | 637  | 17.0146 | 3.66 |
| chrX  | 686707   | 687768   | sdk      | 55   | 17.849  | 4.00 |
| chrX  | 758826   | 760154   | CG5273   | 15   | 12.1639 | 3.23 |
| chrX  | 764416   | 765406   | RpL22    | 58   | 47.7368 | 6.46 |
| chrX  | 764416   | 765406   | CR44966  | 215  | 47.7368 | 6.46 |
| chrX  | 927178   | 928579   | CG3711   | 156  | 15.6161 | 3.91 |
| chrX  | 927178   | 928579   | CG43867  | 549  | 15.6161 | 3.91 |
| chrX  | 927178   | 928579   | MED22    | 712  | 15.6161 | 3.91 |
| chrX  | 940368   | 941426   | CG3704   | 157  | 9.81937 | 3.24 |
| chrX  | 940368   | 941426   | mus81    | 426  | 9.81937 | 3.24 |
| chrX  | 1026478  | 1027066  | CG32814  | 81   | 10.0988 | 3.07 |
| chrX  | 1026478  | 1027066  | CG11638  | 84   | 10.0988 | 3.07 |
| chrX  | 1026478  | 1027066  | CG3021   | 171  | 10.0988 | 3.07 |
| chrX  | 1041113  | 1041393  | CG42259  | 4956 | 9.68089 | 3.37 |
| chrX  | 1341979  | 1342909  | CG11412  | 133  | 19.0787 | 4.04 |



|      |         |         |                   |       |         |      |
|------|---------|---------|-------------------|-------|---------|------|
| chrX | 1353450 | 1354372 | CG12773           | 98    | 13.2926 | 3.72 |
| chrX | 1353450 | 1354372 | CG11417           | 130   | 13.2926 | 3.72 |
| chrX | 1370347 | 1371361 | ssx               | 180   | 36.7171 | 6.46 |
| chrX | 1398729 | 1400057 | CG11448           | 6734  | 48.6447 | 7.16 |
| chrX | 1460284 | 1460955 | Lrpprc2           | 71    | 12.1957 | 3.46 |
| chrX | 1463681 | 1464494 | Ns3               | 193   | 12.6775 | 3.42 |
| chrX | 1465660 | 1467498 | O-fut2            | 898   | 15.733  | 3.55 |
| chrX | 1465660 | 1467498 | CG14777           | 146   | 15.733  | 3.55 |
| chrX | 1465660 | 1467498 | CG14778           | 598   | 15.733  | 3.55 |
| chrX | 1465660 | 1467498 | CG14777           | 598   | 15.733  | 3.55 |
| chrX | 1470237 | 1471331 | pck               | 110   | 20.0096 | 4.33 |
| chrX | 1476173 | 1477334 | Rab27             | 412   | 9.85778 | 3.15 |
| chrX | 1476173 | 1477334 | mei-38            | 500   | 9.85778 | 3.15 |
| chrX | 1478483 | 1479824 | rush              | 159   | 21.0887 | 4.06 |
| chrX | 1482628 | 1483620 | snoRNA:Me28S-G980 | 623   | 42.8867 | 6.35 |
| chrX | 1482628 | 1483620 | sta               | 40    | 42.8867 | 6.35 |
| chrX | 1482628 | 1483620 | inc               | 226   | 42.8867 | 6.35 |
| chrX | 1512864 | 1513514 | inc               | 198   | 18.642  | 3.95 |
| chrX | 1695163 | 1695927 | a6                | 232   | 14.2059 | 3.82 |
| chrX | 1772611 | 1772957 | CG42666           | 934   | 17.6866 | 4.26 |
| chrX | 1773664 | 1774365 | CG42666           | 227   | 18.9129 | 4.22 |
| chrX | 1773664 | 1774365 | Adar              | 221   | 18.9129 | 4.22 |
| chrX | 1858503 | 1859197 | CG14812           | 2     | 8.93717 | 3.16 |
| chrX | 1861251 | 1862532 | deltaCOP          | 211   | 14.852  | 3.98 |
| chrX | 1873215 | 1873575 | Pgam5             | 144   | 11.2123 | 3.08 |
| chrX | 1873832 | 1874520 | Vps26             | 202   | 21.6098 | 4.73 |
| chrX | 1876805 | 1877724 | CG14817           | 265   | 20.753  | 4.68 |
| chrX | 1876805 | 1877724 | CG14805           | 219   | 20.753  | 4.68 |
| chrX | 1880100 | 1881014 | CG14806           | 189   | 19.5797 | 4.77 |
| chrX | 1889379 | 1890782 | trr               | 369   | 17.8858 | 3.91 |
| chrX | 1889379 | 1890782 | mRpL16            | 674   | 17.8858 | 3.91 |
| chrX | 1899411 | 1900682 | arm               | 209   | 40.9794 | 6.63 |
| chrX | 1907354 | 1909326 | Edem1             | 976   | 21.7452 | 5.15 |
| chrX | 1907354 | 1909326 | mip130            | 859   | 21.7452 | 5.15 |
| chrX | 1907354 | 1909326 | Edem1             | 270   | 21.7452 | 5.15 |
| chrX | 1907354 | 1909326 | Rbcn-3B           | 178   | 21.7452 | 5.15 |
| chrX | 1922335 | 1923729 | eIF2B-epsilon     | 282   | 25.7891 | 5.28 |
| chrX | 1922335 | 1923729 | Ocrl              | 176   | 25.7891 | 5.28 |
| chrX | 1953003 | 1953330 | Hr4               | 11203 | 10.7856 | 3.56 |
| chrX | 2008712 | 2009411 | CG4406            | 247   | 12.4986 | 3.43 |
| chrX | 2012071 | 2013675 | east              | 107   | 12.5755 | 3.19 |
| chrX | 2040722 | 2042380 | usp               | 753   | 34.2199 | 5.79 |
| chrX | 2040722 | 2042380 | CG4313            | 198   | 34.2199 | 5.79 |
| chrX | 2040722 | 2042380 | Actn              | 246   | 34.2199 | 5.79 |
| chrX | 2040722 | 2042380 | usp               | 246   | 34.2199 | 5.79 |
| chrX | 2040722 | 2042380 | Actn              | 246   | 34.2199 | 5.79 |
| chrX | 2061469 | 2062068 | Sik2              | 49    | 15.13   | 3.86 |
| chrX | 2077007 | 2077490 | CG4025            | 191   | 8.32326 | 3.09 |
| chrX | 2079909 | 2080964 | CG16903           | 303   | 19.0631 | 3.80 |
| chrX | 2079909 | 2080964 | Unc-76            | 99    | 19.0631 | 3.80 |
| chrX | 2094019 | 2094996 | csw               | 407   | 11.9836 | 3.28 |
| chrX | 2102381 | 2103301 | csw               | 300   | 15.3504 | 4.03 |
| chrX | 2122443 | 2124026 | ph-d              | 56    | 32.0738 | 4.83 |
| chrX | 2134331 | 2138879 | ph-p              | 97    | 29.4106 | 4.61 |
| chrX | 2141319 | 2141995 | CG3835            | 5     | 12.8637 | 3.51 |
| chrX | 2157960 | 2159146 | wapl              | 163   | 27.2509 | 5.08 |

|      |         |         |            |      |         |      |
|------|---------|---------|------------|------|---------|------|
| chrX | 2176732 | 2177108 | Cyp4d2     | 34   | 7.60598 | 3.09 |
| chrX | 2184224 | 2184815 | Nmd3       | 197  | 26.1322 | 5.20 |
| chrX | 2184224 | 2184815 | CG17776    | 253  | 26.1322 | 5.20 |
| chrX | 2221958 | 2222798 | Vinc       | 101  | 13.217  | 3.40 |
| chrX | 2225159 | 2225846 | pcx        | 162  | 20.8177 | 4.43 |
| chrX | 2253552 | 2254467 | CG3091     | 73   | 12.1432 | 3.35 |
| chrX | 2262262 | 2263303 | temp       | 506  | 23.3632 | 5.12 |
| chrX | 2262262 | 2263303 | CG3071     | 185  | 23.3632 | 5.12 |
| chrX | 2274599 | 2275189 | CG2918     | 54   | 15.466  | 3.77 |
| chrX | 2366144 | 2366727 | CG2841     | 15   | 13.0536 | 3.91 |
| chrX | 2447869 | 2448366 | boi        | 259  | 13.9783 | 3.66 |
| chrX | 2447869 | 2448366 | z          | 196  | 13.9783 | 3.66 |
| chrX | 2584973 | 2585412 | CG13760    | 126  | 17.0686 | 4.31 |
| chrX | 2585703 | 2586397 | wds        | 149  | 29.8446 | 5.31 |
| chrX | 2603768 | 2604543 | Klp3A      | 180  | 9.14444 | 3.27 |
| chrX | 2603768 | 2604543 | Zw10       | 36   | 9.14444 | 3.27 |
| chrX | 2609391 | 2610383 | eIF3ga     | 151  | 24.6768 | 5.52 |
| chrX | 2684547 | 2686416 | per        | 31   | 22.4738 | 4.31 |
| chrX | 2703595 | 2704042 | Csat       | 15   | 13.5922 | 3.58 |
| chrX | 2704591 | 2705190 | eIF2B-beta | 153  | 9.85778 | 3.15 |
| chrX | 2731688 | 2732981 | ttm50      | 217  | 22.9958 | 5.28 |
| chrX | 2731688 | 2732981 | CG2712     | 495  | 22.9958 | 5.28 |
| chrX | 2796009 | 2796777 | w          | 3    | 47.1086 | 4.28 |
| chrX | 3485001 | 3486009 | CG14270    | 230  | 20.5028 | 4.77 |
| chrX | 3485001 | 3486009 | CG10803    | 501  | 20.5028 | 4.77 |
| chrX | 3670927 | 3671721 | Parg       | 18   | 16.0163 | 4.26 |
| chrX | 3719261 | 3720597 | Rala       | 29   | 18.3414 | 4.05 |
| chrX | 3719261 | 3720597 | Tlk        | 400  | 18.3414 | 4.05 |
| chrX | 3742057 | 3744163 | Tlk        | 3278 | 30.5465 | 5.24 |
| chrX | 3779696 | 3780340 | Tlk        | 198  | 17.5015 | 4.56 |
| chrX | 3880648 | 3881320 | VhaAC39-1  | 393  | 20.3253 | 4.96 |
| chrX | 3949028 | 3950290 | Vap-33A    | 770  | 11.637  | 3.60 |
| chrX | 3964820 | 3965450 | lva        | 88   | 20.0324 | 4.39 |
| chrX | 4103570 | 4104866 | Xpac       | 138  | 12.7367 | 3.49 |
| chrX | 4103570 | 4104866 | brn        | 282  | 12.7367 | 3.49 |
| chrX | 4105827 | 4107456 | cib        | 58   | 19.866  | 4.03 |
| chrX | 4116247 | 4118314 | Tip60      | 469  | 18.3175 | 3.76 |
| chrX | 4116247 | 4118314 | tyf        | 399  | 18.3175 | 3.76 |
| chrX | 4116247 | 4118314 | Tip60      | 24   | 18.3175 | 3.76 |
| chrX | 4116247 | 4118314 | tyf        | 131  | 18.3175 | 3.76 |
| chrX | 4321828 | 4323301 | mRpL33     | 414  | 10.9124 | 3.02 |
| chrX | 4321828 | 4323301 | norpA      | 20   | 10.9124 | 3.02 |
| chrX | 4411458 | 4411808 | bi         | 1259 | 14.9821 | 4.21 |
| chrX | 4426827 | 4427327 | bi         | 83   | 19.7391 | 4.33 |
| chrX | 4540231 | 4541407 | rb         | 451  | 24.7879 | 4.92 |
| chrX | 4540231 | 4541407 | CHOp24     | 170  | 24.7879 | 4.92 |
| chrX | 4551523 | 4552191 | CG11436    | 128  | 13.5572 | 3.78 |
| chrX | 4551523 | 4552191 | CG3527     | 222  | 13.5572 | 3.78 |
| chrX | 4553682 | 4554348 | CG11444    | 18   | 10.346  | 3.32 |
| chrX | 4649510 | 4650326 | Torsin     | 69   | 10.2275 | 3.46 |
| chrX | 4649510 | 4650326 | Cbp80      | 250  | 10.2275 | 3.46 |
| chrX | 4649510 | 4650326 | Torsin     | 268  | 10.2275 | 3.46 |
| chrX | 4649510 | 4650326 | Cbp80      | 285  | 10.2275 | 3.46 |
| chrX | 4687952 | 4688478 | ctp        | 64   | 15.7576 | 3.64 |
| chrX | 4908940 | 4910941 | CG32772    | 1116 | 10.9124 | 3.02 |
| chrX | 4929884 | 4930909 | CG44774    | 237  | 15.8322 | 4.22 |

|      |         |         |           |      |         |      |
|------|---------|---------|-----------|------|---------|------|
| chrX | 4939049 | 4939730 | Ptp4E     | 72   | 9.91295 | 3.07 |
| chrX | 5048116 | 5048385 | ovo       | 7    | 15.6189 | 4.30 |
| chrX | 5082021 | 5084870 | CG32767   | 124  | 30.1444 | 5.74 |
| chrX | 5085610 | 5085942 | rg        | 43   | 13.4519 | 3.76 |
| chrX | 5085610 | 5085942 | CG15465   | 43   | 13.4519 | 3.76 |
| chrX | 5085610 | 5085942 | rg        | 43   | 13.4519 | 3.76 |
| chrX | 5311862 | 5312468 | TrxT      | 398  | 13.2685 | 3.90 |
| chrX | 5311862 | 5312468 | dhd       | 67   | 13.2685 | 3.90 |
| chrX | 5322172 | 5322884 | Rnp4F     | 64   | 15.515  | 4.07 |
| chrX | 5328859 | 5329475 | CG3309    | 130  | 16.2668 | 4.40 |
| chrX | 5410537 | 5411213 | NAAT1     | 32   | 16.8387 | 4.47 |
| chrX | 5419663 | 5421100 | spoon     | 186  | 56.23   | 8.25 |
| chrX | 5429931 | 5430766 | CG15784   | 67   | 66.7423 | 9.61 |
| chrX | 5516592 | 5518272 | CG12730   | 221  | 13.2179 | 3.49 |
| chrX | 5516592 | 5518272 | CR45518   | 21   | 13.2179 | 3.49 |
| chrX | 5560518 | 5561018 | Vsx2      | 497  | 14.3258 | 3.63 |
| chrX | 5622023 | 5622790 | mir-3645  | 127  | 13.9434 | 3.55 |
| chrX | 5622023 | 5622790 | Mlc-c     | 250  | 13.9434 | 3.55 |
| chrX | 5622023 | 5622790 | I(1)G0045 | 358  | 13.9434 | 3.55 |
| chrX | 5665657 | 5666677 | Sirt4     | 197  | 26.1451 | 5.00 |
| chrX | 5665657 | 5666677 | CG4119    | 86   | 26.1451 | 5.00 |
| chrX | 5671131 | 5671948 | Rab18     | 146  | 33.0101 | 5.43 |
| chrX | 5672411 | 5673260 | RpL35     | 66   | 29.4241 | 5.10 |
| chrX | 5689125 | 5689559 | CG3160    | 134  | 13.9783 | 3.66 |
| chrX | 5689853 | 5691300 | cv        | 212  | 23.1987 | 5.33 |
| chrX | 5689853 | 5691300 | CR45525   | 959  | 23.1987 | 5.33 |
| chrX | 5705476 | 5706249 | CG4096    | 6561 | 15.6189 | 4.30 |
| chrX | 5737178 | 5738247 | CG32758   | 42   | 26.3075 | 4.96 |
| chrX | 5745491 | 5747422 | IntS6     | 126  | 21.5745 | 4.01 |
| chrX | 5747676 | 5748431 | CG4078    | 199  | 9.95205 | 3.27 |
| chrX | 5754582 | 5756457 | lin-52    | 798  | 33.8227 | 5.94 |
| chrX | 5754582 | 5756457 | CG15771   | 9    | 33.8227 | 5.94 |
| chrX | 5763379 | 5765082 | MAPk-Ak2  | 62   | 24.0119 | 4.83 |
| chrX | 5763379 | 5765082 | CG42699   | 411  | 24.0119 | 4.83 |
| chrX | 5879415 | 5880906 | Usp30     | 582  | 16.2668 | 3.52 |
| chrX | 5879415 | 5880906 | CG16721   | 164  | 16.2668 | 3.52 |
| chrX | 5899186 | 5901144 | CR45668   | 903  | 31.0886 | 5.55 |
| chrX | 5899186 | 5901144 | Act5C     | 32   | 31.0886 | 5.55 |
| chrX | 5901701 | 5902282 | Act5C     | 38   | 33.0896 | 5.03 |
| chrX | 5904339 | 5904735 | CG4020    | 1189 | 21.7352 | 4.69 |
| chrX | 5907930 | 5908629 | CG12236   | 58   | 16.2668 | 4.40 |
| chrX | 6036762 | 6038338 | rux       | 3    | 13.5744 | 3.62 |
| chrX | 6036762 | 6038338 | MCTS1     | 632  | 13.5744 | 3.62 |
| chrX | 6081149 | 6081630 | CG4660    | 48   | 10.8995 | 3.53 |
| chrX | 6224014 | 6225127 | sqh       | 205  | 16.3829 | 3.81 |
| chrX | 6225545 | 6226075 | CG14446   | 142  | 16.1486 | 3.72 |
| chrX | 6254523 | 6256242 | Rbcn-3A   | 42   | 14.9177 | 4.06 |
| chrX | 6254523 | 6256242 | Spx       | 376  | 14.9177 | 4.06 |
| chrX | 6267684 | 6268502 | Spt6      | 148  | 21.0887 | 4.06 |
| chrX | 6279055 | 6279676 | Ubi-p5E   | 36   | 15.9106 | 3.54 |
| chrX | 6287511 | 6288671 | Top3beta  | 223  | 25.4332 | 4.68 |
| chrX | 6287511 | 6288671 | wuho      | 114  | 25.4332 | 4.68 |
| chrX | 6290983 | 6291782 | Rpt4      | 281  | 11.7447 | 3.41 |
| chrX | 6290983 | 6291782 | CG15896   | 224  | 11.7447 | 3.41 |
| chrX | 6346293 | 6347582 | CG3847    | 67   | 22.8018 | 4.92 |
| chrX | 6351904 | 6352670 | kdn       | 43   | 20.5412 | 4.50 |

|      |         |         |                    |      |         |      |
|------|---------|---------|--------------------|------|---------|------|
| chrX | 6372426 | 6373214 | PpV                | 82   | 14.1035 | 3.80 |
| chrX | 6524098 | 6524889 | CG42340            | 272  | 14.3584 | 3.50 |
| chrX | 6524098 | 6524889 | CG3918             | 132  | 14.3584 | 3.50 |
| chrX | 6532567 | 6533470 | RpL7A              | 38   | 20.9605 | 4.40 |
| chrX | 6533973 | 6534653 | dx                 | 263  | 14.3784 | 3.75 |
| chrX | 6590681 | 6591163 | Pat1               | 219  | 17.6365 | 4.07 |
| chrX | 6653909 | 6655295 | CG3226             | 567  | 12.286  | 3.43 |
| chrX | 6653909 | 6655295 | Cdc7               | 137  | 12.286  | 3.43 |
| chrX | 6660790 | 6662462 | CG3224             | 313  | 26.1028 | 4.74 |
| chrX | 6660790 | 6662462 | Ctr1A              | 129  | 26.1028 | 4.74 |
| chrX | 6677557 | 6678892 | ND-ASHI            | 71   | 25.7891 | 5.28 |
| chrX | 6677557 | 6678892 | I(1)G0255          | 333  | 25.7891 | 5.28 |
| chrX | 6697891 | 6698628 | CG14440            | 95   | 26.425  | 5.34 |
| chrX | 6699181 | 6699768 | CG14441            | 59   | 39.0495 | 5.89 |
| chrX | 6727146 | 6727477 | CG3168             | 16   | 10.4114 | 3.15 |
| chrX | 6743298 | 6744438 | snoRNA:Psi28S-1232 | 360  | 22.6589 | 4.69 |
| chrX | 6743298 | 6744438 | RpL17              | 4    | 22.6589 | 4.69 |
| chrX | 6756071 | 6756801 | CG14438            | 244  | 11.7823 | 3.37 |
| chrX | 6770663 | 6771833 | COQ7               | 28   | 13.6339 | 3.69 |
| chrX | 6820319 | 6821550 | Nf-YC              | 169  | 17.2519 | 4.04 |
| chrX | 6820319 | 6821550 | xit                | 265  | 17.2519 | 4.04 |
| chrX | 6824181 | 6824890 | nonC               | 193  | 9.42371 | 3.00 |
| chrX | 6843120 | 6844913 | CG14435            | 544  | 25.4297 | 5.61 |
| chrX | 6843120 | 6844913 | CG4557             | 125  | 25.4297 | 5.61 |
| chrX | 6849911 | 6850338 | CG4558             | 352  | 10.5716 | 3.44 |
| chrX | 6868022 | 6868897 | CG43736            | 40   | 18.2727 | 3.67 |
| chrX | 6968197 | 6968806 | CG32732            | 219  | 12.7209 | 3.64 |
| chrX | 6980924 | 6981759 | ogre               | 72   | 12.5492 | 3.66 |
| chrX | 6998389 | 6999106 | lnx2               | 57   | 25.7081 | 5.50 |
| chrX | 7008518 | 7008933 | cm                 | 2438 | 10.6603 | 3.40 |
| chrX | 7010719 | 7012216 | cm                 | 165  | 16.3496 | 4.34 |
| chrX | 7010719 | 7012216 | CG42308            | 376  | 16.3496 | 4.34 |
| chrX | 7010719 | 7012216 | CG32736            | 376  | 16.3496 | 4.34 |
| chrX | 7010719 | 7012216 | CG42308            | 456  | 16.3496 | 4.34 |
| chrX | 7010719 | 7012216 | CG32736            | 456  | 16.3496 | 4.34 |
| chrX | 7097697 | 7098289 | Sxl                | 60   | 38.0315 | 6.30 |
| chrX | 7101455 | 7102446 | CG4615             | 180  | 51.236  | 7.29 |
| chrX | 7109686 | 7110437 | fz4                | 217  | 22.6538 | 5.04 |
| chrX | 7285580 | 7286974 | CG1677             | 20   | 19.6858 | 4.10 |
| chrX | 7285580 | 7286974 | CG2059             | 182  | 19.6858 | 4.10 |
| chrX | 7290832 | 7291422 | unc-119            | 99   | 14.2987 | 3.53 |
| chrX | 7300905 | 7301376 | brk                | 6766 | 25.5319 | 5.38 |
| chrX | 7323408 | 7323902 | Atg5               | 59   | 15.515  | 4.07 |
| chrX | 7696447 | 7696902 | CHES-1-like        | 25   | 17.0945 | 4.25 |
| chrX | 7706772 | 7707363 | CR43287            | 621  | 11.6023 | 3.48 |
| chrX | 7728026 | 7729355 | NELF-B             | 184  | 16.721  | 3.78 |
| chrX | 7728026 | 7729355 | CG12155            | 577  | 16.721  | 3.78 |
| chrX | 7737265 | 7737958 | Tom40              | 183  | 12.4662 | 3.76 |
| chrX | 7888213 | 7888901 | CG10932            | 156  | 18.9699 | 4.70 |
| chrX | 7900874 | 7902420 | snoRNA:Or-aca2     | 800  | 27.5071 | 5.20 |
| chrX | 7900874 | 7902420 | RpS6               | 672  | 27.5071 | 5.20 |
| chrX | 7900874 | 7902420 | bys                | 124  | 27.5071 | 5.20 |
| chrX | 7920045 | 7921104 | hdm                | 302  | 16.921  | 4.49 |
| chrX | 7920045 | 7921104 | Ykt6               | 25   | 16.921  | 4.49 |
| chrX | 7930088 | 7931455 | CG10777            | 125  | 24.0119 | 4.83 |
| chrX | 7932752 | 7934130 | CG10778            | 226  | 15.0627 | 3.69 |

|      |         |         |           |       |         |      |
|------|---------|---------|-----------|-------|---------|------|
| chrX | 7932752 | 7934130 | RpS14a    | 635   | 15.0627 | 3.69 |
| chrX | 7967600 | 7968374 | sws       | 319   | 11.9324 | 3.35 |
| chrX | 8058444 | 8059189 | fs(1)h    | 471   | 11.421  | 3.38 |
| chrX | 8059686 | 8062929 | fs(1)h    | 175   | 13.9973 | 3.47 |
| chrX | 8059686 | 8062929 | mys       | 33    | 13.9973 | 3.47 |
| chrX | 8074919 | 8075982 | Upf2      | 14    | 13.9778 | 3.95 |
| chrX | 8074919 | 8075982 | CG1571    | 424   | 13.9778 | 3.95 |
| chrX | 8092663 | 8094061 | UbcE2H    | 233   | 12.3103 | 3.60 |
| chrX | 8114753 | 8116235 | Gclc      | 106   | 20.8124 | 4.69 |
| chrX | 8120500 | 8121185 | CG2260    | 184   | 20.5412 | 4.50 |
| chrX | 8141414 | 8142406 | Smox      | 446   | 42.0974 | 6.76 |
| chrX | 8143030 | 8143640 | CG17982   | 231   | 9.17076 | 3.07 |
| chrX | 8152763 | 8153290 | CG18262   | 21    | 14.9618 | 3.82 |
| chrX | 8156596 | 8158152 | Traf6     | 97    | 19.6995 | 4.45 |
| chrX | 8156596 | 8158152 | Gllspla2  | 144   | 19.6995 | 4.45 |
| chrX | 8176223 | 8176970 | slpr      | 626   | 17.707  | 4.14 |
| chrX | 8193091 | 8193544 | sdt       | 79    | 23.8306 | 5.40 |
| chrX | 8242201 | 8244468 | Trxr-1    | 101   | 15.5555 | 3.56 |
| chrX | 8242201 | 8244468 | sni       | 732   | 15.5555 | 3.56 |
| chrX | 8242201 | 8244468 | Trxr-1    | 953   | 15.5555 | 3.56 |
| chrX | 8242201 | 8244468 | sni       | 1388  | 15.5555 | 3.56 |
| chrX | 8242201 | 8244468 | Trxr-1    | 1560  | 15.5555 | 3.56 |
| chrX | 8251101 | 8251714 | ND-75     | 26    | 17.5015 | 4.56 |
| chrX | 8294939 | 8296040 | CG15343   | 21699 | 10.7958 | 3.82 |
| chrX | 8398582 | 8399675 | CG10555   | 147   | 20.175  | 4.36 |
| chrX | 8408917 | 8410860 | Trf2      | 67    | 29.5906 | 5.71 |
| chrX | 8408917 | 8410860 | lawc      | 760   | 29.5906 | 5.71 |
| chrX | 8436414 | 8438193 | CG12125   | 149   | 21.7352 | 4.69 |
| chrX | 8436414 | 8438193 | CG1440    | 404   | 21.7352 | 4.69 |
| chrX | 8436414 | 8438193 | CG12125   | 1168  | 21.7352 | 4.69 |
| chrX | 8461565 | 8461921 | Es2       | 231   | 9.14444 | 3.27 |
| chrX | 8463951 | 8464790 | Sptr      | 84    | 10.8995 | 3.53 |
| chrX | 8517233 | 8517967 | Nrg       | 18    | 32.4667 | 5.27 |
| chrX | 8558366 | 8558939 | IntS4     | 122   | 43.0198 | 7.23 |
| chrX | 8559743 | 8562488 | CG12112   | 1718  | 22.2165 | 4.72 |
| chrX | 8559743 | 8562488 | Trf4-1    | 216   | 22.2165 | 4.72 |
| chrX | 8574177 | 8575339 | CG12065   | 126   | 31.0275 | 4.87 |
| chrX | 8591155 | 8591783 | CG12659   | 121   | 29.752  | 4.98 |
| chrX | 8592040 | 8592934 | Crag      | 205   | 12.1588 | 3.56 |
| chrX | 8650559 | 8651489 | oc        | 282   | 39.6378 | 6.45 |
| chrX | 8676747 | 8677568 | CG12772   | 137   | 27.4579 | 4.87 |
| chrX | 8681302 | 8682267 | CG11284   | 65    | 32.4478 | 6.44 |
| chrX | 8714325 | 8715492 | CG2004    | 59    | 24.5682 | 5.24 |
| chrX | 8714325 | 8715492 | CG1785    | 48    | 24.5682 | 5.24 |
| chrX | 8720045 | 8721310 | I(1)G0020 | 428   | 18.94   | 4.77 |
| chrX | 8720045 | 8721310 | CG1789    | 186   | 18.94   | 4.77 |
| chrX | 8805643 | 8806142 | Lim1      | 170   | 15.8056 | 3.74 |
| chrX | 8806561 | 8807016 | Lim1      | 958   | 15.224  | 3.94 |
| chrX | 8863686 | 8864339 | CG12075   | 30    | 17.5838 | 4.58 |
| chrX | 8891448 | 8891965 | Moe       | 58    | 19.6514 | 4.79 |
| chrX | 8899856 | 8900384 | CG1885    | 155   | 17.898  | 4.44 |
| chrX | 8924676 | 8925115 | rdgA      | 291   | 9.80303 | 3.34 |
| chrX | 9029851 | 9030503 | Nost      | 31    | 19.8903 | 4.42 |
| chrX | 9042212 | 9042948 | Nost      | 19    | 16.4087 | 4.29 |
| chrX | 9080778 | 9081541 | CG7246    | 382   | 10.6871 | 3.26 |
| chrX | 9080778 | 9081541 | HP1b      | 186   | 10.6871 | 3.26 |

|      |          |          |              |       |         |      |
|------|----------|----------|--------------|-------|---------|------|
| chrX | 9085843  | 9086338  | CG32708      | 208   | 12.3339 | 3.55 |
| chrX | 9089131  | 9090186  | CG7033       | 77    | 24.9047 | 4.58 |
| chrX | 9103277  | 9103802  | CG7766       | 148   | 21.1032 | 4.37 |
| chrX | 9107008  | 9107597  | Arfrp1       | 190   | 17.7622 | 4.48 |
| chrX | 9148658  | 9149871  | fh           | 430   | 27.7043 | 5.71 |
| chrX | 9148658  | 9149871  | Bap111       | 193   | 27.7043 | 5.71 |
| chrX | 9155496  | 9156699  | His3.3B      | 163   | 21.5849 | 4.20 |
| chrX | 9163167  | 9164428  | mei-P26      | 367   | 13.5509 | 3.52 |
| chrX | 9196050  | 9196509  | CG12118      | 193   | 14.9821 | 4.21 |
| chrX | 9247457  | 9247938  | Dsor1        | 3     | 10.9352 | 3.48 |
| chrX | 9250361  | 9251078  | CG17754      | 133   | 18.7624 | 4.25 |
| chrX | 9282382  | 9283295  | c11.1        | 51    | 30.8649 | 5.90 |
| chrX | 9318653  | 9319810  | c12.1        | 294   | 22.3255 | 4.33 |
| chrX | 9318653  | 9319810  | c12.2        | 159   | 22.3255 | 4.33 |
| chrX | 9355690  | 9357106  | CG34449      | 60    | 14.8323 | 3.51 |
| chrX | 9355690  | 9357106  | BCL7-like    | 466   | 14.8323 | 3.51 |
| chrX | 9553259  | 9553968  | I(1)G0320    | 73    | 69.4842 | 8.20 |
| chrX | 9554425  | 9555234  | RpS28b       | 151   | 23.2554 | 4.34 |
| chrX | 9598841  | 9601699  | Gga          | 212   | 22.6127 | 4.55 |
| chrX | 9608137  | 9609450  | Aats-lys     | 249   | 30.571  | 5.38 |
| chrX | 9608137  | 9609450  | CG42797      | 188   | 30.571  | 5.38 |
| chrX | 9640111  | 9641118  | Ptpmeg2      | 98    | 10.8826 | 3.41 |
| chrX | 9658228  | 9659121  | Ptpmeg2      | 327   | 15.9777 | 3.73 |
| chrX | 9673106  | 9674337  | CG3106       | 11142 | 14.8323 | 3.42 |
| chrX | 9684689  | 9686065  | nej          | 103   | 11.0762 | 3.21 |
| chrX | 9693726  | 9694165  | btd          | 237   | 17.5212 | 4.10 |
| chrX | 9778524  | 9779223  | CG1354       | 49    | 33.3526 | 5.85 |
| chrX | 9865036  | 9865503  | Ser7         | 35    | 10.2275 | 3.46 |
| chrX | 9884373  | 9884807  | CG9691       | 70    | 13.9778 | 3.95 |
| chrX | 10081926 | 10082547 | ZAP3         | 149   | 11.9836 | 3.57 |
| chrX | 10083133 | 10083624 | CG2972       | 206   | 20.0324 | 4.39 |
| chrX | 10085571 | 10086873 | CG2974       | 410   | 19.1053 | 4.38 |
| chrX | 10085571 | 10086873 | RhoU         | 55    | 19.1053 | 4.38 |
| chrX | 10220023 | 10220443 | CG34408      | 110   | 17.2105 | 4.15 |
| chrX | 10325330 | 10326253 | alpha-Man-la | 75    | 22.6095 | 4.67 |
| chrX | 10326579 | 10326841 | CG2909       | 284   | 8.93717 | 3.16 |
| chrX | 10472601 | 10475226 | nocte        | 686   | 14.2928 | 3.44 |
| chrX | 10472601 | 10475226 | CG2889       | 1036  | 14.2928 | 3.44 |
| chrX | 10472601 | 10475226 | nocte        | 1774  | 14.2928 | 3.44 |
| chrX | 10472601 | 10475226 | CG2889       | 1814  | 14.2928 | 3.44 |
| chrX | 10486169 | 10486981 | CG32687      | 224   | 13.9434 | 3.55 |
| chrX | 10546519 | 10546966 | spri         | 34    | 24.6971 | 4.90 |
| chrX | 10735622 | 10736122 | ras          | 8664  | 32.5898 | 5.77 |
| chrX | 10744063 | 10745734 | ras          | 1026  | 40.1538 | 4.82 |
| chrX | 10744063 | 10745734 | CR44766      | 1020  | 40.1538 | 4.82 |
| chrX | 10744063 | 10745734 | CG32676      | 584   | 40.1538 | 4.82 |
| chrX | 10744063 | 10745734 | ras          | 94    | 40.1538 | 4.82 |
| chrX | 10757433 | 10758162 | Rph          | 41    | 13.734  | 4.02 |
| chrX | 10763227 | 10764512 | Tango5       | 42    | 22.4665 | 4.16 |
| chrX | 10767241 | 10769037 | Atg8a        | 155   | 24.3336 | 4.65 |
| chrX | 10767241 | 10769037 | BTBD9        | 353   | 24.3336 | 4.65 |
| chrX | 10772176 | 10772728 | CG15211      | 254   | 14.7377 | 4.08 |
| chrX | 10783668 | 10784728 | sesB         | 15    | 12.8698 | 3.33 |
| chrX | 10785648 | 10787000 | sesB         | 618   | 27.1138 | 4.99 |
| chrX | 10785648 | 10787000 | Ant2         | 618   | 27.1138 | 4.99 |
| chrX | 10785648 | 10787000 | sesB         | 618   | 27.1138 | 4.99 |

|      |          |          |          |      |         |      |
|------|----------|----------|----------|------|---------|------|
| chrX | 10846489 | 10847714 | sbr      | 222  | 12.3502 | 3.27 |
| chrX | 10846489 | 10847714 | CG17333  | 567  | 12.3502 | 3.27 |
| chrX | 10848682 | 10849361 | CG2202   | 208  | 29.3303 | 5.73 |
| chrX | 10857152 | 10858655 | sofe     | 648  | 18.4788 | 3.97 |
| chrX | 10857152 | 10858655 | CG2186   | 405  | 18.4788 | 3.97 |
| chrX | 10927308 | 10927721 | CG2145   | 48   | 12.5236 | 3.84 |
| chrX | 11086024 | 11086476 | sev      | 44   | 14.9821 | 4.21 |
| chrX | 11107962 | 11109226 | Hsp60    | 164  | 39.7015 | 6.15 |
| chrX | 11125134 | 11125603 | Rpt3     | 148  | 16.7534 | 4.05 |
| chrX | 11128293 | 11129197 | Gtp-bp   | 54   | 23.1987 | 5.33 |
| chrX | 11135944 | 11138489 | Klp10A   | 1020 | 22.4738 | 4.31 |
| chrX | 11135944 | 11138489 | CDK2AP1  | 280  | 22.4738 | 4.31 |
| chrX | 11147554 | 11148702 | Ran      | 182  | 31.9551 | 5.13 |
| chrX | 11154010 | 11155287 | Dlic     | 138  | 18.8066 | 3.94 |
| chrX | 11338987 | 11340317 | Kap3     | 207  | 41.2653 | 6.36 |
| chrX | 11338987 | 11340317 | CG34348  | 491  | 41.2653 | 6.36 |
| chrX | 11338987 | 11340317 | Kap3     | 703  | 41.2653 | 6.36 |
| chrX | 11348999 | 11349435 | CG1738   | 110  | 8.42918 | 3.07 |
| chrX | 11349850 | 11351869 | CG11752  | 664  | 25.3355 | 4.97 |
| chrX | 11349850 | 11351869 | CG1737   | 54   | 25.3355 | 4.97 |
| chrX | 11355852 | 11356484 | dsh      | 363  | 13.8063 | 3.67 |
| chrX | 11367505 | 11368629 | hop      | 68   | 19.8195 | 4.54 |
| chrX | 11367505 | 11368629 | Tim8     | 414  | 19.8195 | 4.54 |
| chrX | 11389615 | 11390390 | dlg1     | 119  | 11.8392 | 3.20 |
| chrX | 11423419 | 11424279 | Gs2      | 67   | 24.98   | 5.18 |
| chrX | 11426191 | 11427744 | Gs2      | 3514 | 28.5116 | 5.90 |
| chrX | 11453816 | 11454479 | Evi5     | 19   | 13.1236 | 3.93 |
| chrX | 11454814 | 11455318 | HP5      | 164  | 11.3549 | 3.65 |
| chrX | 11569756 | 11570879 | RplI215  | 40   | 33.5262 | 5.66 |
| chrX | 11569756 | 11570879 | CG11699  | 334  | 33.5262 | 5.66 |
| chrX | 11580132 | 11581084 | nod      | 388  | 14.7954 | 3.84 |
| chrX | 11599797 | 11600059 | rho-4    | 45   | 11.3549 | 3.65 |
| chrX | 11610923 | 11612453 | CG2247   | 273  | 19.1053 | 4.38 |
| chrX | 11610923 | 11612453 | CG1703   | 547  | 19.1053 | 4.38 |
| chrX | 11621380 | 11622423 | Ptp10D   | 65   | 27.1453 | 5.13 |
| chrX | 11694936 | 11695760 | PhKgamma | 142  | 27.3397 | 4.91 |
| chrX | 11709639 | 11710445 | FucT6    | 10   | 16.4711 | 3.93 |
| chrX | 11720142 | 11720952 | Tango10  | 44   | 14.587  | 4.04 |
| chrX | 11791850 | 11793355 | CkIIbeta | 24   | 25.5021 | 4.93 |
| chrX | 11804999 | 11806576 | Hsc70-3  | 31   | 19.565  | 3.98 |
| chrX | 11815697 | 11818595 | CG1578   | 72   | 21.6098 | 4.73 |
| chrX | 11815697 | 11818595 | rudhira  | 418  | 21.6098 | 4.73 |
| chrX | 11852133 | 11852647 | p24-1    | 216  | 12.3195 | 3.44 |
| chrX | 11854363 | 11855698 | CG10347  | 174  | 15.8278 | 4.02 |
| chrX | 11854363 | 11855698 | ATP7     | 84   | 15.8278 | 4.02 |
| chrX | 11886854 | 11887607 | CG10353  | 14   | 14.4125 | 3.70 |
| chrX | 11886854 | 11887607 | SelG     | 135  | 14.4125 | 3.70 |
| chrX | 12003649 | 12004198 | fw       | 57   | 11.2909 | 3.63 |
| chrX | 12018564 | 12019041 | CG15735  | 221  | 17.678  | 4.08 |
| chrX | 12028290 | 12029128 | Usp7     | 373  | 14.6472 | 4.05 |
| chrX | 12031013 | 12031480 | Cyp311a1 | 169  | 10.1855 | 3.23 |
| chrX | 12203601 | 12204031 | Ten-a    | 42   | 9.85778 | 3.15 |
| chrX | 12463442 | 12464156 | CG42258  | 73   | 16.614  | 4.27 |
| chrX | 12579004 | 12579590 | CG11138  | 3956 | 16.9084 | 4.21 |
| chrX | 12582618 | 12583873 | CG11138  | 170  | 23.4245 | 4.05 |
| chrX | 12595040 | 12596797 | CG1824   | 119  | 32.6478 | 5.71 |

|      |          |          |            |      |         |      |
|------|----------|----------|------------|------|---------|------|
| chrX | 12595040 | 12596797 | Sec16      | 541  | 32.6478 | 5.71 |
| chrX | 12610907 | 12612700 | CG1463     | 354  | 12.7164 | 3.26 |
| chrX | 12610907 | 12612700 | CG2543     | 155  | 12.7164 | 3.26 |
| chrX | 12631517 | 12632304 | Tomosyn    | 155  | 23.0519 | 4.58 |
| chrX | 12658946 | 12659684 | Tis11      | 84   | 12.0224 | 3.20 |
| chrX | 12658946 | 12659684 | CR33963    | 37   | 12.0224 | 3.20 |
| chrX | 12665185 | 12665555 | Tis11      | 4810 | 9.74536 | 3.12 |
| chrX | 12735098 | 12736400 | CR43963    | 4931 | 17.835  | 4.23 |
| chrX | 12753674 | 12754711 | CR44619    | 2210 | 15.9634 | 4.11 |
| chrX | 12755039 | 12756002 | CR44619    | 3851 | 13.6339 | 3.69 |
| chrX | 12764764 | 12765502 | CG3812     | 54   | 19.0922 | 4.65 |
| chrX | 12902779 | 12903646 | CG4407     | 120  | 21.3118 | 4.41 |
| chrX | 12905267 | 12906120 | CG4404     | 226  | 21.4109 | 4.03 |
| chrX | 12909182 | 12909685 | Brms1      | 200  | 9.43051 | 3.19 |
| chrX | 12909995 | 12910455 | CG4645     | 246  | 19.1801 | 4.40 |
| chrX | 13089785 | 13090533 | hep        | 158  | 17.6365 | 3.81 |
| chrX | 13091037 | 13091353 | lic        | 7    | 11.3009 | 3.51 |
| chrX | 13112200 | 13112717 | CG43313    | 42   | 13.734  | 4.02 |
| chrX | 13128036 | 13129380 | snmRNA:204 | 135  | 33.7484 | 5.78 |
| chrX | 13128036 | 13129380 | CG32638    | 29   | 33.7484 | 5.78 |
| chrX | 13128036 | 13129380 | CG15717    | 186  | 33.7484 | 5.78 |
| chrX | 13128036 | 13129380 | MFS10      | 252  | 33.7484 | 5.78 |
| chrX | 13128036 | 13129380 | CG15717    | 252  | 33.7484 | 5.78 |
| chrX | 13130978 | 13131972 | MFS10      | 131  | 26.3442 | 5.40 |
| chrX | 13154789 | 13155267 | CG4318     | 85   | 12.1405 | 3.45 |
| chrX | 13154789 | 13155267 | CG4332     | 28   | 12.1405 | 3.45 |
| chrX | 13159099 | 13160138 | Bap60      | 60   | 13.9434 | 3.55 |
| chrX | 13159099 | 13160138 | CG12096    | 35   | 13.9434 | 3.55 |
| chrX | 13211088 | 13211746 | sno        | 62   | 17.7622 | 4.48 |
| chrX | 13212245 | 13212615 | REG        | 74   | 17.5838 | 4.58 |
| chrX | 13285954 | 13286447 | CG15743    | 42   | 18.94   | 4.77 |
| chrX | 13287893 | 13288667 | CG15744    | 177  | 22.9185 | 4.61 |
| chrX | 13296358 | 13297611 | CG1764     | 668  | 22.553  | 5.09 |
| chrX | 13296358 | 13297611 | CG1622     | 238  | 22.553  | 5.09 |
| chrX | 13314899 | 13315191 | IP3K2      | 67   | 7.0378  | 3.08 |
| chrX | 13329605 | 13330243 | Jafrac1    | 47   | 29.3214 | 5.15 |
| chrX | 13337058 | 13337842 | RpS15Aa    | 110  | 25.8329 | 4.58 |
| chrX | 13338231 | 13338765 | CG15747    | 138  | 10.7044 | 3.42 |
| chrX | 13383912 | 13385665 | Rbp1-like  | 461  | 14.5114 | 3.73 |
| chrX | 13383912 | 13385665 | Tim9a      | 793  | 14.5114 | 3.73 |
| chrX | 13386822 | 13388275 | Yippee     | 191  | 29.3896 | 5.66 |
| chrX | 13386822 | 13388275 | CG1662     | 336  | 29.3896 | 5.66 |
| chrX | 13403830 | 13405012 | GstT4      | 84   | 18.94   | 4.77 |
| chrX | 13412643 | 13413726 | CG1998     | 197  | 31.5662 | 6.24 |
| chrX | 13412643 | 13413726 | Set2       | 30   | 31.5662 | 6.24 |
| chrX | 13563248 | 13564185 | Tango13    | 248  | 24.3799 | 4.72 |
| chrX | 13615840 | 13616753 | tth        | 145  | 21.8608 | 4.65 |
| chrX | 13623825 | 13625645 | CG2691     | 386  | 24.1136 | 4.55 |
| chrX | 13623825 | 13625645 | NFAT       | 50   | 24.1136 | 4.55 |
| chrX | 13717917 | 13718382 | CG9940     | 186  | 17.3931 | 4.32 |
| chrX | 13735977 | 13736419 | g          | 33   | 9.01856 | 3.13 |
| chrX | 13739567 | 13740433 | CG11151    | 2    | 33.2876 | 5.48 |
| chrX | 13754601 | 13755544 | CR43833    | 49   | 13.4499 | 3.25 |
| chrX | 13754601 | 13755544 | Pdcd4      | 36   | 13.4499 | 3.25 |
| chrX | 13757107 | 13757613 | Rtc1       | 111  | 18.642  | 3.95 |
| chrX | 13762579 | 13763105 | rdgB       | 46   | 15.3789 | 3.57 |



|      |          |          |           |      |         |      |
|------|----------|----------|-----------|------|---------|------|
| chrX | 13781639 | 13782336 | CtsB1     | 279  | 13.7206 | 3.84 |
| chrX | 13783434 | 13784669 | inaE      | 134  | 23.2554 | 4.34 |
| chrX | 13821517 | 13822469 | Clic      | 75   | 18.642  | 3.95 |
| chrX | 13829686 | 13830329 | jub       | 227  | 12.8577 | 3.42 |
| chrX | 13933860 | 13934265 | mamo      | 740  | 13.734  | 4.02 |
| chrX | 14210944 | 14211630 | I(1)G0469 | 59   | 9.42371 | 3.00 |
| chrX | 14233541 | 14234184 | CG42271   | 142  | 20.5412 | 4.50 |
| chrX | 14237750 | 14238705 | Fbxl4     | 561  | 9.31717 | 3.26 |
| chrX | 14237750 | 14238705 | CG1434    | 170  | 9.31717 | 3.26 |
| chrX | 14580449 | 14580928 | CG14414   | 70   | 23.2683 | 5.18 |
| chrX | 14582662 | 14583072 | mRpS25    | 84   | 11.0212 | 3.15 |
| chrX | 14825521 | 14826280 | rut       | 17   | 27.8952 | 5.50 |
| chrX | 14831627 | 14832168 | CG14408   | 32   | 19.6294 | 4.87 |
| chrX | 14832509 | 14833415 | CG14411   | 205  | 39.1945 | 7.20 |
| chrX | 14837694 | 14840285 | CG14407   | 1194 | 14.4125 | 3.70 |
| chrX | 14837694 | 14840285 | CG32590   | 286  | 14.4125 | 3.70 |
| chrX | 14837694 | 14840285 | Flo2      | 17   | 14.4125 | 3.70 |
| chrX | 14950403 | 14950870 | pdgy      | 84   | 17.835  | 4.23 |
| chrX | 14955201 | 14955726 | eag       | 89   | 13.734  | 4.02 |
| chrX | 15063254 | 15064365 | hiw       | 679  | 18.7614 | 4.08 |
| chrX | 15063254 | 15064365 | ND-B18    | 190  | 18.7614 | 4.08 |
| chrX | 15066033 | 15066465 | opm       | 183  | 10.2275 | 3.46 |
| chrX | 15074575 | 15076352 | Lsd-2     | 897  | 10.8909 | 3.30 |
| chrX | 15082648 | 15083080 | CG33178   | 47   | 18.4659 | 4.30 |
| chrX | 15083978 | 15086466 | CG9065    | 1585 | 23.8946 | 4.87 |
| chrX | 15083978 | 15086466 | CG15027   | 457  | 23.8946 | 4.87 |
| chrX | 15083978 | 15086466 | CG5599    | 160  | 23.8946 | 4.87 |
| chrX | 15138720 | 15139829 | RpL37a    | 150  | 27.0049 | 5.03 |
| chrX | 15311821 | 15312278 | CR44961   | 5851 | 10.2209 | 3.29 |
| chrX | 15313702 | 15314447 | CR44961   | 3745 | 17.6866 | 4.26 |
| chrX | 15319316 | 15321085 | Top1      | 487  | 15.8498 | 3.70 |
| chrX | 15319316 | 15321085 | mir-4957  | 59   | 15.8498 | 3.70 |
| chrX | 15319316 | 15321085 | Top1      | 390  | 15.8498 | 3.70 |
| chrX | 15323091 | 15323885 | Top1      | 175  | 35.968  | 5.69 |
| chrX | 15333214 | 15334175 | HDAC6     | 98   | 12.3916 | 3.20 |
| chrX | 15449127 | 15450690 | Scamp     | 461  | 20.175  | 4.36 |
| chrX | 15449127 | 15450690 | Ahcy13    | 84   | 20.175  | 4.36 |
| chrX | 15453271 | 15453852 | CG11655   | 123  | 20.5698 | 4.78 |
| chrX | 15462065 | 15463140 | shtd      | 418  | 28.7812 | 5.46 |
| chrX | 15462065 | 15463140 | CG6299    | 138  | 28.7812 | 5.46 |
| chrX | 15462065 | 15463140 | CG6294    | 138  | 28.7812 | 5.46 |
| chrX | 15465413 | 15465885 | CG6299    | 72   | 12.1432 | 3.35 |
| chrX | 15471533 | 15472597 | Grip128   | 193  | 10.3937 | 3.34 |
| chrX | 15471533 | 15472597 | CG6308    | 149  | 10.3937 | 3.34 |
| chrX | 15498810 | 15499645 | Gmap      | 72   | 10.346  | 3.32 |
| chrX | 15577855 | 15578643 | cerv      | 205  | 15.0627 | 3.69 |
| chrX | 15577855 | 15578643 | CG7872    | 172  | 15.0627 | 3.69 |
| chrX | 15582284 | 15583202 | CG9215    | 330  | 11.6551 | 3.39 |
| chrX | 15582284 | 15583202 | CG8097    | 614  | 11.6551 | 3.39 |
| chrX | 15593367 | 15593711 | CG9220    | 10   | 15.224  | 3.94 |
| chrX | 15697403 | 15698460 | CG8128    | 205  | 11.8019 | 3.28 |
| chrX | 15702997 | 15704465 | Pis       | 207  | 18.1375 | 4.17 |
| chrX | 15702997 | 15704465 | CG8134    | 561  | 18.1375 | 4.17 |
| chrX | 15709645 | 15711374 | CG9281    | 48   | 49.8226 | 7.57 |
| chrX | 15709645 | 15711374 | CG15601   | 155  | 49.8226 | 7.57 |
| chrX | 15732199 | 15732450 | CG8191    | 128  | 10.1855 | 3.23 |

|      |          |          |              |      |         |      |
|------|----------|----------|--------------|------|---------|------|
| chrX | 15733318 | 15734617 | CG12379      | 248  | 10.346  | 3.32 |
| chrX | 15733318 | 15734617 | I(1)G0136    | 25   | 10.346  | 3.32 |
| chrX | 15738545 | 15739907 | CG11679      | 359  | 18.7546 | 4.19 |
| chrX | 15738545 | 15739907 | CG8206       | 84   | 18.7546 | 4.19 |
| chrX | 15745745 | 15746291 | CG8944       | 231  | 12.8637 | 3.51 |
| chrX | 15746656 | 15747567 | Tcp-1zeta    | 224  | 27.7043 | 5.71 |
| chrX | 15749039 | 15749460 | CG8239       | 90   | 23.5836 | 4.68 |
| chrX | 15761124 | 15761533 | mRpL3        | 27   | 15.7165 | 3.88 |
| chrX | 15762856 | 15763418 | CG17209      | 361  | 8.80992 | 3.18 |
| chrX | 15785443 | 15786434 | Paf-AHalpa   | 636  | 10.5272 | 3.32 |
| chrX | 15785443 | 15786434 | mRpS30       | 173  | 10.5272 | 3.32 |
| chrX | 15857271 | 15857885 | Myb          | 112  | 15.635  | 3.76 |
| chrX | 15859979 | 15860918 | Gbeta13F     | 199  | 22.4738 | 4.31 |
| chrX | 15868050 | 15868767 | Gapdh2       | 62   | 27.8259 | 4.76 |
| chrX | 15909405 | 15909886 | CycD         | 125  | 10.3036 | 3.60 |
| chrX | 15986435 | 15986830 | ND-20        | 131  | 16.614  | 4.27 |
| chrX | 15996969 | 15997499 | CG8939       | 200  | 14.7199 | 3.72 |
| chrX | 16104496 | 16105080 | CG42353      | 43   | 36.0359 | 5.64 |
| chrX | 16104496 | 16105080 | CG42354      | 43   | 36.0359 | 5.64 |
| chrX | 16104496 | 16105080 | CG42353      | 43   | 36.0359 | 5.64 |
| chrX | 16244768 | 16245105 | snRNA:U5:14B | 9190 | 31.686  | 6.36 |
| chrX | 16275391 | 16276774 | kat80        | 259  | 33.9995 | 6.23 |
| chrX | 16275391 | 16276774 | Prosalpa4    | 170  | 33.9995 | 6.23 |
| chrX | 16277908 | 16278616 | eas          | 57   | 23.3237 | 4.51 |
| chrX | 16286184 | 16286814 | UQCR-14      | 45   | 19.6294 | 4.87 |
| chrX | 16287923 | 16289401 | CG32576      | 263  | 13.4499 | 3.25 |
| chrX | 16287923 | 16289401 | caz          | 539  | 13.4499 | 3.25 |
| chrX | 16296181 | 16297368 | CG9911       | 99   | 11.6319 | 3.20 |
| chrX | 16296181 | 16297368 | CG3632       | 182  | 11.6319 | 3.20 |
| chrX | 16296181 | 16297368 | CG9911       | 397  | 11.6319 | 3.20 |
| chrX | 16296181 | 16297368 | CG3632       | 594  | 11.6319 | 3.20 |
| chrX | 16319276 | 16320553 | Cyp1         | 85   | 24.0787 | 5.21 |
| chrX | 16325605 | 16326067 | CalpC        | 62   | 9.27259 | 3.25 |
| chrX | 16331597 | 16332077 | CG9921       | 223  | 20.6778 | 4.47 |
| chrX | 16384775 | 16385919 | CG9992       | 580  | 19.6294 | 4.87 |
| chrX | 16384775 | 16385919 | CG4239       | 11   | 19.6294 | 4.87 |
| chrX | 16391007 | 16392010 | TH1          | 401  | 12.5236 | 3.84 |
| chrX | 16391007 | 16392010 | mei-41       | 142  | 12.5236 | 3.84 |
| chrX | 16421705 | 16423804 | AnxB11       | 41   | 34.0898 | 5.31 |
| chrX | 16421705 | 16423804 | hang         | 629  | 34.0898 | 5.31 |
| chrX | 16440750 | 16442524 | CG9947       | 407  | 11.0265 | 3.08 |
| chrX | 16440750 | 16442524 | rngo         | 151  | 11.0265 | 3.08 |
| chrX | 16446551 | 16447194 | eIF-2alpha   | 119  | 16.148  | 3.97 |
| chrX | 16447957 | 16449618 | CG34015      | 598  | 36.1934 | 6.10 |
| chrX | 16447957 | 16449618 | Rbp2         | 236  | 36.1934 | 6.10 |
| chrX | 16552784 | 16553892 | Arp2         | 830  | 10.9184 | 3.22 |
| chrX | 16558994 | 16560123 | Pp2B-14D     | 218  | 34.8939 | 6.00 |
| chrX | 16593032 | 16594342 | SMC3         | 503  | 16.2668 | 4.40 |
| chrX | 16593032 | 16594342 | Ubc7         | 266  | 16.2668 | 4.40 |
| chrX | 16597648 | 16598587 | CG9784       | 53   | 11.1508 | 3.14 |
| chrX | 16599058 | 16600135 | CG9784       | 168  | 24.5309 | 4.46 |
| chrX | 16599058 | 16600135 | Nup153       | 143  | 24.5309 | 4.46 |
| chrX | 16610579 | 16611285 | mbt          | 69   | 15.3692 | 3.48 |
| chrX | 16636708 | 16638735 | Rok          | 144  | 48.7269 | 7.17 |
| chrX | 16636708 | 16638735 | RpS19a       | 623  | 48.7269 | 7.17 |
| chrX | 16640778 | 16641738 | mthl1        | 33   | 18.9645 | 4.41 |

|      |          |          |            |      |         |      |
|------|----------|----------|------------|------|---------|------|
| chrX | 16751315 | 16752129 | goe        | 32   | 25.4047 | 5.61 |
| chrX | 16783091 | 16784459 | if         | 722  | 18.8924 | 4.61 |
| chrX | 16783091 | 16784459 | mRpL22     | 224  | 18.8924 | 4.61 |
| chrX | 16787725 | 16788373 | Sap30      | 159  | 13.8063 | 3.67 |
| chrX | 16792027 | 16793303 | CG4768     | 25   | 12.5236 | 3.84 |
| chrX | 16803039 | 16803361 | CG9125     | 170  | 8.98547 | 3.07 |
| chrX | 16930676 | 16931525 | CG4928     | 6136 | 11.9344 | 3.74 |
| chrX | 17107376 | 17107984 | CG5004     | 73   | 31.7752 | 5.76 |
| chrX | 17147704 | 17148622 | RpS5a      | 69   | 48.6746 | 7.08 |
| chrX | 17148970 | 17149444 | CG5010     | 84   | 21.0332 | 5.05 |
| chrX | 17301567 | 17302004 | Fim        | 45   | 18.1543 | 4.01 |
| chrX | 17302391 | 17303294 | CG5445     | 165  | 39.7343 | 6.08 |
| chrX | 17314192 | 17314898 | B-H2       | 142  | 10.7257 | 3.54 |
| chrX | 17397212 | 17397579 | B-H1       | 74   | 13.1236 | 3.93 |
| chrX | 17423396 | 17423887 | CG5613     | 26   | 11.0619 | 3.40 |
| chrX | 17506756 | 17507270 | CG43658    | 43   | 15.8056 | 3.74 |
| chrX | 17579669 | 17580439 | CG12991    | 66   | 15.477  | 4.27 |
| chrX | 17635504 | 17636849 | CG8289     | 433  | 28.7812 | 5.46 |
| chrX | 17635504 | 17636849 | CG5800     | 197  | 28.7812 | 5.46 |
| chrX | 17651089 | 17652660 | RhoGAPp190 | 149  | 17.2322 | 3.74 |
| chrX | 17656398 | 17656883 | IntS2      | 169  | 20.6165 | 4.28 |
| chrX | 17657294 | 17657675 | beta-Spec  | 136  | 20.6778 | 4.47 |
| chrX | 17694522 | 17694885 | chas       | 275  | 10.7044 | 3.42 |
| chrX | 17698187 | 17698897 | chas       | 73   | 33.2663 | 5.99 |
| chrX | 17702326 | 17703065 | CG8188     | 61   | 11.8107 | 3.71 |
| chrX | 17738162 | 17739275 | CG42684    | 109  | 11.3549 | 3.65 |
| chrX | 17768094 | 17768686 | unc-4      | 243  | 31.4721 | 5.35 |
| chrX | 17826535 | 17827759 | Socs16D    | 31   | 47.3886 | 7.56 |
| chrX | 17830693 | 17831183 | CG6398     | 97   | 16.921  | 4.49 |
| chrX | 17830693 | 17831183 | CR44691    | 170  | 16.921  | 4.49 |
| chrX | 17844528 | 17845606 | CG8142     | 21   | 12.0148 | 3.42 |
| chrX | 17844528 | 17845606 | Ucp4A      | 265  | 12.0148 | 3.42 |
| chrX | 17849802 | 17850709 | CG15814    | 229  | 18.2484 | 4.38 |
| chrX | 17849802 | 17850709 | Spt7       | 346  | 18.2484 | 4.38 |
| chrX | 17860458 | 17861547 | Arp8       | 530  | 11.6191 | 3.28 |
| chrX | 17860458 | 17861547 | CG6769     | 329  | 11.6191 | 3.28 |
| chrX | 17886468 | 17887499 | mnb        | 159  | 27.5781 | 5.36 |
| chrX | 17907571 | 17908146 | Vps4       | 110  | 17.5838 | 4.58 |
| chrX | 17911330 | 17911680 | CG6847     | 54   | 14.6738 | 3.61 |
| chrX | 18084872 | 18086217 | CG7536     | 5    | 21.5521 | 4.72 |
| chrX | 18084872 | 18086217 | Ada3       | 358  | 21.5521 | 4.72 |
| chrX | 18090099 | 18090544 | CG7206     | 139  | 10.4692 | 3.08 |
| chrX | 18091257 | 18091748 | scu        | 171  | 15.5517 | 3.90 |
| chrX | 18100913 | 18101429 | CG7192     | 74   | 41.2947 | 6.78 |
| chrX | 18101916 | 18102449 | Taf8       | 203  | 26.1898 | 5.71 |
| chrX | 18136460 | 18137961 | ari-1      | 191  | 29.3858 | 5.29 |
| chrX | 18320873 | 18321263 | CG6023     | 168  | 9.13261 | 3.27 |
| chrX | 18370678 | 18371763 | CrebB      | 130  | 14.4751 | 3.52 |
| chrX | 18483484 | 18484105 | Hayan      | 44   | 31.5825 | 6.15 |
| chrX | 18489278 | 18489838 | CG15046    | 17   | 9.08306 | 3.15 |
| chrX | 18499471 | 18500235 | GalNAc-T2  | 136  | 21.8876 | 4.41 |
| chrX | 18499471 | 18500235 | Rad51D     | 390  | 21.8876 | 4.41 |
| chrX | 18512162 | 18512614 | Ggt-1      | 60   | 11.2548 | 3.29 |
| chrX | 18515251 | 18516205 | Aats-his   | 44   | 19.2473 | 4.35 |
| chrX | 18515251 | 18516205 | Bx         | 44   | 19.2473 | 4.35 |
| chrX | 18515251 | 18516205 | Aats-his   | 44   | 19.2473 | 4.35 |

|      |          |          |           |      |         |      |
|------|----------|----------|-----------|------|---------|------|
| chrX | 18646817 | 18649003 | Rip11     | 108  | 25.041  | 4.55 |
| chrX | 18646817 | 18649003 | CG6540    | 722  | 25.041  | 4.55 |
| chrX | 18652596 | 18653209 | Ing3      | 42   | 9.2139  | 3.18 |
| chrX | 18787906 | 18789682 | CG6961    | 508  | 17.3003 | 3.84 |
| chrX | 18787906 | 18789682 | S6KL      | 255  | 17.3003 | 3.84 |
| chrX | 18790091 | 18790445 | S6KL      | 35   | 13.0113 | 3.77 |
| chrX | 18793645 | 18794103 | Atg101    | 2092 | 10.5272 | 3.32 |
| chrX | 18830509 | 18831061 | CG7101    | 111  | 15.9106 | 3.54 |
| chrX | 18843359 | 18844504 | CG34422   | 89   | 27.2259 | 4.95 |
| chrX | 18848029 | 18849062 | CG7280    | 43   | 15.224  | 3.94 |
| chrX | 18848029 | 18849062 | CG34422   | 490  | 15.224  | 3.94 |
| chrX | 18863578 | 18864340 | CG7326    | 281  | 16.5217 | 3.79 |
| chrX | 18863578 | 18864340 | CG34401   | 108  | 16.5217 | 3.79 |
| chrX | 18893074 | 18893738 | CG7358    | 105  | 14.587  | 4.04 |
| chrX | 19152939 | 19154057 | RhoGAP18B | 63   | 37.1354 | 6.64 |
| chrX | 19261710 | 19262624 | Vav       | 171  | 18.258  | 4.68 |
| chrX | 19268387 | 19268960 | CG8010    | 199  | 10.0988 | 3.07 |
| chrX | 19276384 | 19276872 | CG32537   | 84   | 17.985  | 4.20 |
| chrX | 19353050 | 19353652 | kek5      | 149  | 22.2268 | 5.10 |
| chrX | 19478790 | 19481074 | CG32533   | 1291 | 29.6609 | 5.72 |
| chrX | 19478790 | 19481074 | mRpS14    | 785  | 29.6609 | 5.72 |
| chrX | 19478790 | 19481074 | Nat1      | 719  | 29.6609 | 5.72 |
| chrX | 19478790 | 19481074 | mRpS14    | 464  | 29.6609 | 5.72 |
| chrX | 19478790 | 19481074 | Nat1      | 444  | 29.6609 | 5.72 |
| chrX | 19491616 | 19493015 | pcm       | 614  | 24.3799 | 4.72 |
| chrX | 19491616 | 19493015 | ND-18     | 205  | 24.3799 | 4.72 |
| chrX | 19494169 | 19497208 | CG12204   | 1304 | 20.3191 | 3.81 |
| chrX | 19494169 | 19497208 | ksh       | 713  | 20.3191 | 3.81 |
| chrX | 19494169 | 19497208 | CG14200   | 201  | 20.3191 | 3.81 |
| chrX | 19494169 | 19497208 | Pfrx      | 201  | 20.3191 | 3.81 |
| chrX | 19494169 | 19497208 | CR44340   | 191  | 20.3191 | 3.81 |
| chrX | 19494169 | 19497208 | Pfrx      | 969  | 20.3191 | 3.81 |
| chrX | 19520537 | 19523122 | I(1)G0156 | 1060 | 64.8876 | 9.58 |
| chrX | 19520537 | 19523122 | CoRest    | 772  | 64.8876 | 9.58 |
| chrX | 19565363 | 19566669 | Grip84    | 532  | 19.6885 | 4.26 |
| chrX | 19565363 | 19566669 | car       | 114  | 19.6885 | 4.26 |
| chrX | 19578010 | 19580056 | Tao       | 166  | 20.4891 | 3.79 |
| chrX | 19597687 | 19598733 | RpS10b    | 156  | 29.4783 | 6.03 |
| chrX | 19605073 | 19606026 | CG14207   | 25   | 20.2323 | 4.94 |
| chrX | 19613644 | 19614310 | Shawn     | 142  | 13.1236 | 3.93 |
| chrX | 19616120 | 19616783 | CG14210   | 159  | 17.5561 | 3.94 |
| chrX | 19631256 | 19631978 | CG14212   | 6086 | 21.6057 | 4.47 |
| chrX | 19636938 | 19639220 | e(y)3     | 595  | 29.3132 | 4.96 |
| chrX | 19636938 | 19639220 | Rcd-1     | 992  | 29.3132 | 4.96 |
| chrX | 19662697 | 19663172 | CG14223   | 433  | 26.6562 | 4.84 |
| chrX | 19664520 | 19666029 | Ssu72     | 169  | 13.6935 | 4.01 |
| chrX | 19667072 | 19668823 | Zw        | 27   | 22.4096 | 4.77 |
| chrX | 19667072 | 19668823 | CR44512   | 468  | 22.4096 | 4.77 |
| chrX | 19683030 | 19684456 | dome      | 247  | 21.9998 | 4.22 |
| chrX | 19683030 | 19684456 | Ubqn      | 536  | 21.9998 | 4.22 |
| chrX | 19692909 | 19693555 | Mer       | 209  | 16.7602 | 4.24 |
| chrX | 19696913 | 19697774 | Cdc42     | 168  | 30.7569 | 6.24 |
| chrX | 19703583 | 19704722 | CG14232   | 152  | 17.0945 | 4.25 |
| chrX | 19703583 | 19704722 | CG14230   | 174  | 17.0945 | 4.25 |
| chrX | 19703583 | 19704722 | CG14232   | 258  | 17.0945 | 4.25 |
| chrX | 19743526 | 19745093 | COX6B     | 257  | 31.0824 | 5.62 |

|      |          |          |           |     |         |      |
|------|----------|----------|-----------|-----|---------|------|
| chrX | 19743526 | 19745093 | CG18809   | 30  | 31.0824 | 5.62 |
| chrX | 19743526 | 19745093 | COX6B     | 30  | 31.0824 | 5.62 |
| chrX | 19743526 | 19745093 | CG33932   | 125 | 31.0824 | 5.62 |
| chrX | 19743526 | 19745093 | Rpp20     | 125 | 31.0824 | 5.62 |
| chrX | 19743526 | 19745093 | CG33932   | 125 | 31.0824 | 5.62 |
| chrX | 19743526 | 19745093 | Rpp20     | 125 | 31.0824 | 5.62 |
| chrX | 19746036 | 19746913 | parvin    | 154 | 12.8996 | 3.26 |
| chrX | 19746036 | 19746913 | CR45501   | 254 | 12.8996 | 3.26 |
| chrX | 19750682 | 19751615 | Pmp70     | 135 | 30.0491 | 5.89 |
| chrX | 19851361 | 19852480 | pico      | 213 | 22.0322 | 4.38 |
| chrX | 19851361 | 19852480 | Nup205    | 59  | 22.0322 | 4.38 |
| chrX | 19865199 | 19865609 | CG15618   | 62  | 21.7445 | 5.06 |
| chrX | 19886894 | 19887924 | Hers      | 21  | 47.0308 | 7.03 |
| chrX | 20158932 | 20160157 | Rab35     | 337 | 20.6778 | 4.47 |
| chrX | 20235762 | 20236484 | sw        | 31  | 12.2069 | 3.69 |
| chrX | 20250580 | 20252306 | CG17068   | 170 | 21.1677 | 4.44 |
| chrX | 20250580 | 20252306 | Rab10     | 414 | 21.1677 | 4.44 |
| chrX | 20391289 | 20392079 | I(1)G0004 | 111 | 25.041  | 4.55 |
| chrX | 20392660 | 20393842 | Syx16     | 50  | 11.9344 | 3.74 |
| chrX | 20394221 | 20394994 | HERC2     | 201 | 13.3788 | 3.86 |
| chrX | 20423368 | 20424625 | Pp4-19C   | 74  | 20.4022 | 4.35 |
| chrX | 20423368 | 20424625 | cactin    | 346 | 20.4022 | 4.35 |
| chrX | 20429914 | 20430592 | mal       | 145 | 14.8918 | 3.70 |
| chrX | 20468278 | 20468627 | GstT3     | 82  | 16.921  | 4.49 |
| chrX | 20510418 | 20510919 | RhoGAP19D | 13  | 16.148  | 3.97 |
| chrX | 20524462 | 20525233 | Tak1      | 80  | 23.2908 | 5.11 |
| chrX | 21028011 | 21028425 | CG1532    | 96  | 14.8918 | 3.70 |
| chrX | 21031652 | 21032091 | CG1529    | 90  | 16.9743 | 4.43 |
| chrX | 21035379 | 21036027 | Ntf-2     | 259 | 16.911  | 4.03 |
| chrX | 21042453 | 21043386 | Mgstl     | 109 | 19.1053 | 4.38 |
| chrX | 21045067 | 21045676 | Cbs       | 24  | 40.4539 | 6.61 |
| chrX | 21052605 | 21054216 | CG1518    | 754 | 26.1078 | 5.35 |
| chrX | 21052605 | 21054216 | bves      | 779 | 26.1078 | 5.35 |
| chrX | 21116909 | 21117520 | unc       | 261 | 18.6029 | 4.10 |
| chrX | 21116909 | 21117520 | CG15445   | 15  | 18.6029 | 4.10 |
| chrX | 21280701 | 21281503 | CG32521   | 43  | 44.4478 | 7.55 |
| chrX | 21315916 | 21316352 | Rpt6      | 194 | 11.8446 | 3.54 |
| chrX | 21318914 | 21319378 | CG33713   | 17  | 18.7624 | 4.25 |
| chrX | 21318914 | 21319378 | SLIRP1    | 17  | 18.7624 | 4.25 |
| chrX | 21318914 | 21319378 | CG33713   | 100 | 18.7624 | 4.25 |
| chrX | 21318914 | 21319378 | SLIRP1    | 100 | 18.7624 | 4.25 |
| chrX | 21323102 | 21324999 | Dd        | 477 | 20.2357 | 4.44 |
| chrX | 21323102 | 21324999 | CG1486    | 420 | 20.2357 | 4.44 |
| chrX | 21339573 | 21340343 | tty       | 156 | 19.9533 | 4.64 |
| chrX | 21339573 | 21340343 | flil      | 92  | 19.9533 | 4.64 |
| chrX | 21345173 | 21345848 | dod       | 171 | 34.1384 | 6.64 |
| chrX | 21350164 | 21350866 | sol       | 255 | 20.3253 | 4.96 |
| chrX | 21358190 | 21358659 | 44075     | 61  | 17.5402 | 3.63 |
| chrX | 21362928 | 21363546 | waw       | 149 | 37.9402 | 6.63 |
| chrX | 21362928 | 21363546 | bbx       | 149 | 37.9402 | 6.63 |
| chrX | 21373964 | 21375798 | slgA      | 60  | 19.4731 | 3.87 |
| chrX | 21373964 | 21375798 | CR45611   | 46  | 19.4731 | 3.87 |
| chrX | 21373964 | 21375798 | slgA      | 395 | 19.4731 | 3.87 |
| chrX | 21387535 | 21387992 | Hlc       | 111 | 13.7673 | 3.56 |
| chrX | 21629443 | 21630100 | DIP1      | 177 | 10.1212 | 3.43 |
| chrX | 22444671 | 22445432 | CG14621   | 236 | 20.3253 | 4.96 |

|      |          |          |         |     |         |      |
|------|----------|----------|---------|-----|---------|------|
| chrX | 22454880 | 22455371 | wap     | 288 | 11.6551 | 3.21 |
| chrX | 22455661 | 22457150 | Usp2    | 123 | 15.9328 | 3.63 |
| chrX | 22471609 | 22472049 | CG14613 | 217 | 16.2668 | 4.40 |
| chrX | 22481034 | 22481509 | CG12576 | 753 | 20.6311 | 4.46 |
| chrX | 22481769 | 22482119 | CG12576 | 32  | 12.0148 | 3.42 |
| chrX | 22481769 | 22482119 | Cp110   | 86  | 12.0148 | 3.42 |
| chrX | 22529908 | 22530389 | S6kII   | 170 | 13.1236 | 3.93 |
| chrX | 22539726 | 22540403 | CG17598 | 131 | 15.882  | 3.86 |
| chrX | 23096302 | 23096683 | CG17162 | 258 | 10.8826 | 3.41 |
| chrX | 23097437 | 23098006 | su(f)   | 239 | 10.8826 | 3.41 |

**Supplementary Table 6** Genes showing overlapped binding of CoRest-C, CBP, and Rpd3

| Chromosom | Gene Symbol |
|-----------|-------------|
| chr2L     | Akap200     |
| chr2L     | al          |
| chr2L     | Aldh        |
| chr2L     | aop         |
| chr2L     | Arpc2       |
| chr2L     | aru         |
| chr2L     | Atet        |
| chr2L     | ATPsynG     |
| chr2L     | Atxn7       |
| chr2L     | B4          |
| chr2L     | bowl        |
| chr2L     | brat        |
| chr2L     | bun         |
| chr2L     | capt        |
| chr2L     | cbt         |
| chr2L     | cdc14       |
| chr2L     | CG10188     |
| chr2L     | CG10283     |
| chr2L     | CG10348     |
| chr2L     | CG10492     |
| chr2L     | CG10570     |
| chr2L     | CG10600     |
| chr2L     | CG11050     |
| chr2L     | CG13398     |
| chr2L     | CG15390     |
| chr2L     | CG17078     |
| chr2L     | CG17292     |
| chr2L     | CG18507     |
| chr2L     | CG2818      |
| chr2L     | CG31638     |
| chr2L     | CG3164      |
| chr2L     | CG31668     |
| chr2L     | CG31694     |
| chr2L     | CG31729     |
| chr2L     | CG31743     |
| chr2L     | CG31751     |
| chr2L     | CG31955     |
| chr2L     | CG34164     |
| chr2L     | CG34172     |
| chr2L     | CG3609      |
| chr2L     | CG4036      |
| chr2L     | CG4230      |
| chr2L     | CG42502     |
| chr2L     | CG4935      |
| chr2L     | CG5853      |
| chr2L     | CG5953      |
| chr2L     | CG5973      |
| chr2L     | CG6094      |
| chr2L     | CG6287      |
| chr2L     | CG6700      |
| chr2L     | CG6746      |
| chr2L     | CG6770      |
| chr2L     | CG6785      |
| chr2L     | CG7337      |

|       |         |
|-------|---------|
| chr2L | CG8814  |
| chr2L | CG9171  |
| chr2L | CG9175  |
| chr2L | CG9331  |
| chr2L | CG9932  |
| chr2L | ck      |
| chr2L | CR43314 |
| chr2L | CR44392 |
| chr2L | CR44587 |
| chr2L | CR44911 |
| chr2L | CR44985 |
| chr2L | CR45297 |
| chr2L | CR45341 |
| chr2L | CR45463 |
| chr2L | CR9162  |
| chr2L | crol    |
| chr2L | crp     |
| chr2L | Daxx    |
| chr2L | dia     |
| chr2L | Dif     |
| chr2L | dpp     |
| chr2L | dpy     |
| chr2L | drl     |
| chr2L | drongo  |
| chr2L | ebi     |
| chr2L | eIF-4a  |
| chr2L | Elf     |
| chr2L | emb     |
| chr2L | fok     |
| chr2L | frtz    |
| chr2L | GATAd   |
| chr2L | Gli     |
| chr2L | Hnf4    |
| chr2L | ldgf3   |
| chr2L | Jhl-21  |
| chr2L | l(2)gd1 |
| chr2L | lace    |
| chr2L | let-7-C |
| chr2L | lilli   |
| chr2L | Mondo   |
| chr2L | MRP     |
| chr2L | Msp300  |
| chr2L | mts     |
| chr2L | Myo31DF |
| chr2L | Ncoa6   |
| chr2L | Nhe3    |
| chr2L | nop5    |
| chr2L | nrv1    |
| chr2L | NTPase  |
| chr2L | oaf     |
| chr2L | p38b    |
| chr2L | papi    |
| chr2L | Pde11   |
| chr2L | Pino    |
| chr2L | Pka-C1  |
| chr2L | Rab5    |



|       |                      |
|-------|----------------------|
| chr2L | Rab6                 |
| chr2L | Reps                 |
| chr2L | Rh5                  |
| chr2L | Rim2                 |
| chr2L | RpL30                |
| chr2L | RpL7-like            |
| chr2L | Rtnl1                |
| chr2L | SC35                 |
| chr2L | caRNA:PsiU2-38.40.42 |
| chr2L | Sec61alpha           |
| chr2L | Sirt1                |
| chr2L | Sirup                |
| chr2L | Slh                  |
| chr2L | Smg5                 |
| chr2L | sno                  |
| chr2L | ;noRNA:Me28S-U1230   |
| chr2L | Socs36E              |
| chr2L | spen                 |
| chr2L | spi                  |
| chr2L | Su(dx)               |
| chr2L | Tep2                 |
| chr2L | Tep3                 |
| chr2L | tup                  |
| chr2L | tweek                |
| chr2L | vari                 |
| chr2L | Vha68-2              |
| chr2L | Ziz                  |
| chr2R | 14-3-3zeta           |
| chr2R | Adf1                 |
| chr2R | ana3                 |
| chr2R | arr                  |
| chr2R | ATPsynF              |
| chr2R | bbc                  |
| chr2R | betaTub56D           |
| chr2R | blw                  |
| chr2R | boca                 |
| chr2R | CalpA                |
| chr2R | Camta                |
| chr2R | ced-6                |
| chr2R | CG11362              |
| chr2R | CG13322              |
| chr2R | CG13516              |
| chr2R | CG13531              |
| chr2R | CG14478              |
| chr2R | CG15097              |
| chr2R | CG15673              |
| chr2R | CG15863              |
| chr2R | CG18067              |
| chr2R | CG18467              |
| chr2R | CG18812              |
| chr2R | CG1902               |
| chr2R | CG2811               |
| chr2R | CG30015              |
| chr2R | CG30089              |
| chr2R | CG30152              |
| chr2R | CG30159              |

|       |             |
|-------|-------------|
| chr2R | CG30197     |
| chr2R | CG30338     |
| chr2R | CG30345     |
| chr2R | CG30394     |
| chr2R | CG30493     |
| chr2R | CG30496     |
| chr2R | CG33798     |
| chr2R | CG3511      |
| chr2R | CG3548      |
| chr2R | CG3776      |
| chr2R | CG3788      |
| chr2R | CG42321     |
| chr2R | CG42516     |
| chr2R | CG42524     |
| chr2R | CG42663     |
| chr2R | CG42837     |
| chr2R | CG44243     |
| chr2R | CG5009      |
| chr2R | CG8399      |
| chr2R | CG8738      |
| chr2R | CG8839      |
| chr2R | CG9812      |
| chr2R | CG9896      |
| chr2R | chn         |
| chr2R | conv        |
| chr2R | coro        |
| chr2R | cpa         |
| chr2R | CR43650     |
| chr2R | CR43651     |
| chr2R | CR44748     |
| chr2R | CR45143     |
| chr2R | CR45267     |
| chr2R | CR45270     |
| chr2R | CR45321     |
| chr2R | CR46194     |
| chr2R | CR46257     |
| chr2R | Cyp6a20     |
| chr2R | Cyt-b5      |
| chr2R | Dll         |
| chr2R | dom         |
| chr2R | Drat        |
| chr2R | E(Pc)       |
| chr2R | EbpIII      |
| chr2R | EcR         |
| chr2R | Ef1alpha48D |
| chr2R | emp         |
| chr2R | exu         |
| chr2R | Fcp1        |
| chr2R | fra         |
| chr2R | fus         |
| chr2R | gcl         |
| chr2R | GEFmeso     |
| chr2R | Got1        |
| chr2R | Gp150       |
| chr2R | Gpo-1       |
| chr2R | grh         |

|       |            |
|-------|------------|
| chr2R | GstE12     |
| chr2R | HmgZ       |
| chr2R | hts        |
| chr2R | ken        |
| chr2R | I(2)k01209 |
| chr2R | levy       |
| chr2R | lig        |
| chr2R | Lpin       |
| chr2R | LRR        |
| chr2R | Magi       |
| chr2R | Mapmodulin |
| chr2R | Mef2       |
| chr2R | MESR4      |
| chr2R | mi         |
| chr2R | mir-14     |
| chr2R | mir-281-1  |
| chr2R | mir-281-2  |
| chr2R | mir-4978   |
| chr2R | mlt        |
| chr2R | Myd88      |
| chr2R | nahoda     |
| chr2R | NAT1       |
| chr2R | Not1       |
| chr2R | Oda        |
| chr2R | pAbp       |
| chr2R | Pabb2      |
| chr2R | pain       |
| chr2R | Pal1       |
| chr2R | Pbp49      |
| chr2R | Pdk        |
| chr2R | Pfk        |
| chr2R | phtf       |
| chr2R | pio        |
| chr2R | pirk       |
| chr2R | pk         |
| chr2R | Pka-R2     |
| chr2R | Ppa        |
| chr2R | Pu         |
| chr2R | px         |
| chr2R | qkr54B     |
| chr2R | Rab32      |
| chr2R | RabX1      |
| chr2R | Reg-5      |
| chr2R | RpL18A     |
| chr2R | RpL19      |
| chr2R | RpL23      |
| chr2R | RpLP2      |
| chr2R | SCAP       |
| chr2R | Sdc        |
| chr2R | SelD       |
| chr2R | Sesn       |
| chr2R | shot       |
| chr2R | Sik3       |
| chr2R | Sin3A      |
| chr2R | Slik       |
| chr2R | slim       |

|       |                    |
|-------|--------------------|
| chr2R | slv                |
| chr2R | snoRNA:Me28S-A1322 |
| chr2R | so                 |
| chr2R | Sox14              |
| chr2R | Sox15              |
| chr2R | Spn42Da            |
| chr2R | sut1               |
| chr2R | Taz                |
| chr2R | TER94              |
| chr2R | Tsp42Ea            |
| chr2R | Tsp42EI            |
| chr2R | tun                |
| chr2R | Ubc10              |
| chr2R | Vha16-1            |
| chr2R | Vps13              |
| chr2R | wdp                |
| chr2R | whd                |
| chr2R | wmd                |
| chr2R | Xbp1               |
| chr2R | zip                |
| chr3L | ago                |
| chr3L | Arl1               |
| chr3L | asf1               |
| chr3L | Atg18a             |
| chr3L | bbg                |
| chr3L | bmm                |
| chr3L | CG10585            |
| chr3L | CG10660            |
| chr3L | CG11399            |
| chr3L | CG11486            |
| chr3L | CG11658            |
| chr3L | CG12004            |
| chr3L | CG13484            |
| chr3L | CG13698            |
| chr3L | CG13893            |
| chr3L | CG13907            |
| chr3L | CG13917            |
| chr3L | CG14997            |
| chr3L | CG17180            |
| chr3L | CG17839            |
| chr3L | CG18136            |
| chr3L | CG2162             |
| chr3L | CG2211             |
| chr3L | CG32039            |
| chr3L | CG32103            |
| chr3L | CG32137            |
| chr3L | CG32138            |
| chr3L | CG32264            |
| chr3L | CG32276            |
| chr3L | CG32369            |
| chr3L | CG32486            |
| chr3L | CG33169            |
| chr3L | CG33229            |
| chr3L | CG34056            |
| chr3L | CG3408             |
| chr3L | CG34250            |

|       |         |
|-------|---------|
| chr3L | CG3764  |
| chr3L | CG3797  |
| chr3L | CG3902  |
| chr3L | CG3961  |
| chr3L | CG4042  |
| chr3L | CG42637 |
| chr3L | CG43245 |
| chr3L | CG4825  |
| chr3L | CG5087  |
| chr3L | CG5577  |
| chr3L | CG5618  |
| chr3L | CG5989  |
| chr3L | CG6767  |
| chr3L | CG6812  |
| chr3L | CG7879  |
| chr3L | CG8596  |
| chr3L | CG9119  |
| chr3L | chb     |
| chr3L | chrb    |
| chr3L | CR42719 |
| chr3L | CR42862 |
| chr3L | CR43334 |
| chr3L | CR43875 |
| chr3L | CR45121 |
| chr3L | CR45168 |
| chr3L | CR45396 |
| chr3L | CR45681 |
| chr3L | CR45916 |
| chr3L | CycT    |
| chr3L | Dab     |
| chr3L | dar1    |
| chr3L | Dhc64C  |
| chr3L | Diap1   |
| chr3L | dikar   |
| chr3L | DnaJ-1  |
| chr3L | DOR     |
| chr3L | dos     |
| chr3L | E(bx)   |
| chr3L | ERR     |
| chr3L | eyg     |
| chr3L | fal     |
| chr3L | fax     |
| chr3L | Fit1    |
| chr3L | form3   |
| chr3L | FoxK    |
| chr3L | fwd     |
| chr3L | gry     |
| chr3L | Gug     |
| chr3L | Gyc76C  |
| chr3L | h       |
| chr3L | Hsp83   |
| chr3L | ImpL2   |
| chr3L | klar    |
| chr3L | klu     |
| chr3L | Krn     |
| chr3L | kst     |

|       |           |
|-------|-----------|
| chr3L | I(3)02640 |
| chr3L | I(3)76BDm |
| chr3L | Lmpt      |
| chr3L | MED19     |
| chr3L | melt      |
| chr3L | MEP-1     |
| chr3L | mib1      |
| chr3L | mirr      |
| chr3L | Mocs1     |
| chr3L | Mpcp      |
| chr3L | mRpL2     |
| chr3L | mRpS26    |
| chr3L | Msr-110   |
| chr3L | mthl10    |
| chr3L | MYPT-75D  |
| chr3L | Ndfip     |
| chr3L | Nedd4     |
| chr3L | nmo       |
| chr3L | Notum     |
| chr3L | nuf       |
| chr3L | ome       |
| chr3L | P5CDh1    |
| chr3L | Pdp1      |
| chr3L | Pep       |
| chr3L | Pex1      |
| chr3L | PGRP-LA   |
| chr3L | PGRP-LF   |
| chr3L | Pitslre   |
| chr3L | Ptip      |
| chr3L | QC        |
| chr3L | Rab8      |
| chr3L | Rap1      |
| chr3L | RasGAP1   |
| chr3L | Reg-2     |
| chr3L | rgn       |
| chr3L | RhoGEF3   |
| chr3L | roq       |
| chr3L | scny      |
| chr3L | scyl      |
| chr3L | Sec63     |
| chr3L | SH3PX1    |
| chr3L | simj      |
| chr3L | siz       |
| chr3L | smg       |
| chr3L | Sod       |
| chr3L | Spn       |
| chr3L | Spn77Ba   |
| chr3L | SREBP     |
| chr3L | sti       |
| chr3L | sty       |
| chr3L | Taf4      |
| chr3L | Tgi       |
| chr3L | tna       |
| chr3L | tral      |
| chr3L | trc       |
| chr3L | Ubc4      |

|       |               |
|-------|---------------|
| chr3L | UGP           |
| chr3L | upSET         |
| chr3L | Usp32         |
| chr3L | Vap-33B       |
| chr3L | velo          |
| chr3L | vsg           |
| chr3R | 14-3-3epsilon |
| chr3R | Afti          |
| chr3R | Akt1          |
| chr3R | alpha-Est8    |
| chr3R | alpha-Man-IIb |
| chr3R | alphaTub84B   |
| chr3R | Atg17         |
| chr3R | Atg4b         |
| chr3R | ATP8B         |
| chr3R | Atpalpha      |
| chr3R | ATPsynC       |
| chr3R | ATPsynE       |
| chr3R | ATPsyngamma   |
| chr3R | att-ORFA      |
| chr3R | Axn           |
| chr3R | B52           |
| chr3R | ball          |
| chr3R | Best1         |
| chr3R | bocks         |
| chr3R | Bruce         |
| chr3R | by            |
| chr3R | Cad99C        |
| chr3R | CG10055       |
| chr3R | CG10126       |
| chr3R | CG10311       |
| chr3R | CG10365       |
| chr3R | CG10903       |
| chr3R | CG11880       |
| chr3R | CG11882       |
| chr3R | CG11899       |
| chr3R | CG12054       |
| chr3R | CG12213       |
| chr3R | CG12413       |
| chr3R | CG12581       |
| chr3R | CG12818       |
| chr3R | CG12948       |
| chr3R | CG14259       |
| chr3R | CG14661       |
| chr3R | CG17271       |
| chr3R | CG17360       |
| chr3R | CG17734       |
| chr3R | CG1910        |
| chr3R | CG2310        |
| chr3R | CG2519        |
| chr3R | CG2747        |
| chr3R | CG2846        |
| chr3R | CG2911        |
| chr3R | CG31038       |
| chr3R | CG31075       |
| chr3R | CG31098       |

|       |         |
|-------|---------|
| chr3R | CG31103 |
| chr3R | CG31145 |
| chr3R | CG31211 |
| chr3R | CG31224 |
| chr3R | CG31324 |
| chr3R | CG33111 |
| chr3R | CG34133 |
| chr3R | CG42668 |
| chr3R | CG42828 |
| chr3R | CG43143 |
| chr3R | CG43427 |
| chr3R | CG4433  |
| chr3R | CG45218 |
| chr3R | CG5044  |
| chr3R | CG5214  |
| chr3R | CG5346  |
| chr3R | CG5793  |
| chr3R | CG6051  |
| chr3R | CG6178  |
| chr3R | CG6218  |
| chr3R | CG6231  |
| chr3R | CG6439  |
| chr3R | CG6959  |
| chr3R | CG6966  |
| chr3R | CG7071  |
| chr3R | CG7518  |
| chr3R | CG7943  |
| chr3R | CG8121  |
| chr3R | CG8176  |
| chr3R | CG8866  |
| chr3R | CG9821  |
| chr3R | cic     |
| chr3R | cnc     |
| chr3R | corto   |
| chr3R | COX5A   |
| chr3R | CR31044 |
| chr3R | CR43130 |
| chr3R | CR46036 |
| chr3R | cry     |
| chr3R | CycG    |
| chr3R | Cyp9f2  |
| chr3R | Cys     |
| chr3R | Dhap-at |
| chr3R | dmt     |
| chr3R | Dmtn    |
| chr3R | ea      |
| chr3R | eff     |
| chr3R | eIF4G2  |
| chr3R | ffl     |
| chr3R | GC1     |
| chr3R | GILT1   |
| chr3R | glo     |
| chr3R | Glut4EF |
| chr3R | GlyS    |
| chr3R | GstD1   |
| chr3R | Hel89B  |



|       |           |
|-------|-----------|
| chr3R | His2Av    |
| chr3R | Hr96      |
| chr3R | Hrb98DE   |
| chr3R | Hs6st     |
| chr3R | Hsromega  |
| chr3R | Inx3      |
| chr3R | Itp-r83A  |
| chr3R | jagn      |
| chr3R | jar       |
| chr3R | JHDM2     |
| chr3R | jumu      |
| chr3R | jvl       |
| chr3R | kay       |
| chr3R | Kdm2      |
| chr3R | kra       |
| chr3R | KrT95D    |
| chr3R | l(3)neo38 |
| chr3R | lap       |
| chr3R | Lk6       |
| chr3R | lost      |
| chr3R | LpR2      |
| chr3R | lute      |
| chr3R | Map205    |
| chr3R | Mdh2      |
| chr3R | Med       |
| chr3R | MED25     |
| chr3R | Mgat2     |
| chr3R | mir-4949  |
| chr3R | Mitofilin |
| chr3R | mld       |
| chr3R | mod(mdg4) |
| chr3R | mor       |
| chr3R | mRpL35    |
| chr3R | mRpL47    |
| chr3R | Muted     |
| chr3R | nero      |
| chr3R | Nmnat     |
| chr3R | nsl1      |
| chr3R | p38a      |
| chr3R | Pak3      |
| chr3R | Pcd       |
| chr3R | Pglym78   |
| chr3R | PKD       |
| chr3R | Pli       |
| chr3R | Pp1-87B   |
| chr3R | Ppcs      |
| chr3R | pyd       |
| chr3R | Rab1      |
| chr3R | Rab7      |
| chr3R | Rassf     |
| chr3R | REPTOR    |
| chr3R | Rpl18     |
| chr3R | RpL13A    |
| chr3R | RpL32     |
| chr3R | RpS27     |
| chr3R | RpS28a    |

|       |           |
|-------|-----------|
| chr3R | scrib     |
| chr3R | SelR      |
| chr3R | Set8      |
| chr3R | slmb      |
| chr3R | snRNA:7SK |
| chr3R | Spec2     |
| chr3R | spg       |
| chr3R | spz       |
| chr3R | sqd       |
| chr3R | sr        |
| chr3R | ssh       |
| chr3R | su(Hw)    |
| chr3R | subdued   |
| chr3R | Sym       |
| chr3R | T48       |
| chr3R | Taf1      |
| chr3R | tara      |
| chr3R | Tctp      |
| chr3R | TfIIA-S   |
| chr3R | TI        |
| chr3R | Tm1       |
| chr3R | tmod      |
| chr3R | Tpc1      |
| chr3R | trbd      |
| chr3R | Trc8      |
| chr3R | Tsp86D    |
| chr3R | Ubc6      |
| chr3R | Unc-115a  |
| chr3R | unk       |
| chr3R | Vha13     |
| chr3R | Vti1b     |
| chr3R | wkd       |
| chr3R | XNP       |
| chr3R | Xrp1      |
| chr3R | yata      |
| chr3R | Zip89B    |
| chr3R | Zip99C    |
| chrX  | Actn      |
| chrX  | Atg8a     |
| chrX  | bi        |
| chrX  | brk       |
| chrX  | BTBD9     |
| chrX  | c11.1     |
| chrX  | Cdc42     |
| chrX  | CG11151   |
| chrX  | CG11448   |
| chrX  | CG12065   |
| chrX  | CG12075   |
| chrX  | CG12236   |
| chrX  | CG12991   |
| chrX  | CG1354    |
| chrX  | CG14200   |
| chrX  | CG14777   |
| chrX  | CG14795   |
| chrX  | CG1486    |
| chrX  | CG15046   |

|      |          |
|------|----------|
| chrX | CG15211  |
| chrX | CG15717  |
| chrX | CG15771  |
| chrX | CG15784  |
| chrX | CG1677   |
| chrX | CG1737   |
| chrX | CG17896  |
| chrX | CG18809  |
| chrX | CG2059   |
| chrX | CG3091   |
| chrX | CG32521  |
| chrX | CG32638  |
| chrX | CG32687  |
| chrX | CG32758  |
| chrX | CG33178  |
| chrX | CG33932  |
| chrX | CG34348  |
| chrX | CG3835   |
| chrX | CG3847   |
| chrX | CG4096   |
| chrX | CG42353  |
| chrX | CG42354  |
| chrX | CG4293   |
| chrX | CG4313   |
| chrX | CG4768   |
| chrX | CG5010   |
| chrX | CG5273   |
| chrX | CG6023   |
| chrX | CG6299   |
| chrX | CG6398   |
| chrX | CG6847   |
| chrX | CG7033   |
| chrX | CG9691   |
| chrX | chas     |
| chrX | Ckllbeta |
| chrX | Clic     |
| chrX | CoRest   |
| chrX | COX6B    |
| chrX | CR33963  |
| chrX | CR43963  |
| chrX | CR44340  |
| chrX | CR44619  |
| chrX | CR44691  |
| chrX | CR44966  |
| chrX | CrebB    |
| chrX | csw      |
| chrX | ctp      |
| chrX | cv       |
| chrX | dhd      |
| chrX | Dok      |
| chrX | dome     |
| chrX | Evi5     |
| chrX | Flo2     |
| chrX | fs(1)h   |
| chrX | fz4      |
| chrX | Gclc     |

|      |            |
|------|------------|
| chrX | Gs2        |
| chrX | GstT3      |
| chrX | GstT4      |
| chrX | hang       |
| chrX | Hayan      |
| chrX | Hers       |
| chrX | Hr4        |
| chrX | Hsp60      |
| chrX | inc        |
| chrX | IntS6      |
| chrX | Inx2       |
| chrX | Jafrac1    |
| chrX | Kap3       |
| chrX | kek5       |
| chrX | l(1)G0156  |
| chrX | lawc       |
| chrX | Lsd-2      |
| chrX | mamo       |
| chrX | MFS10      |
| chrX | Mgstl      |
| chrX | NAAT1      |
| chrX | nej        |
| chrX | NFAT       |
| chrX | Nup205     |
| chrX | per        |
| chrX | Pfrx       |
| chrX | ph-d       |
| chrX | PhKgamma   |
| chrX | ph-p       |
| chrX | pico       |
| chrX | Pp2B-14D   |
| chrX | Rala       |
| chrX | Ran        |
| chrX | RhoGAP18B  |
| chrX | RhoU       |
| chrX | Rok        |
| chrX | RpL17      |
| chrX | RpL22      |
| chrX | RpL37a     |
| chrX | Rpp20      |
| chrX | RpS14a     |
| chrX | RpS19a     |
| chrX | RpS28b     |
| chrX | RpS5a      |
| chrX | rut        |
| chrX | snmRNA:204 |
| chrX | spoon      |
| chrX | spri       |
| chrX | Tis11      |
| chrX | Tlk        |
| chrX | Top1       |
| chrX | Trf4-1     |
| chrX | Ubi-p5E    |
| chrX | usp        |
| chrX | Usp2       |
| chrX | Usp7       |

|      |           |
|------|-----------|
| chrX | VhaAC39-1 |
| chrX | Vinc      |
| chrX | w         |
| chrX | Ykt6      |

**Supplementary Table 7** Genes related to the enriched GO terms

The genes categorized in each GO term were shown. The genes showing significant increase after 5-min optogenetic activation followed by 10-min rest were indicated in red.

| Enriched GO term (molecular functions)    | Genes                                                                                                                                                                                                                                                                                                                                                                                                                                                                       |
|-------------------------------------------|-----------------------------------------------------------------------------------------------------------------------------------------------------------------------------------------------------------------------------------------------------------------------------------------------------------------------------------------------------------------------------------------------------------------------------------------------------------------------------|
| protein domain specific binding           | Su(dx); <b>aop</b> ;Sirt1;Myd88;14-3-3zeta; <b>fra</b> ;dos; <b>Hsp83</b> ;Arl1;Dab; <b>Nedd4</b> ;Ndfip;Ubc6; <b>pyd</b> ;14-3-3epsilon;mod(mdg4); <b>TI</b> ;Rala;ctp; <b>pico</b>                                                                                                                                                                                                                                                                                        |
| DNA-binding transcription factor activity | <b>cbt</b> ;aop;lilli;bowl;dpy; <b>Hnf4</b> ;GATAd;bun; <b>CG9932</b> ;Sirt1;crp; <b>Dif</b> ;tup;Mondo; <b>EcR</b> ;phtf; <b>so</b> ;Camta;Mef2;Sox15;chn;MESR4; <b>grh</b> ;Xbp1; <b>ken</b> ;Sox14;dar1;Pdp1;ERR; <b>h</b> ;klu;FoxK;eyg; <b>mirr</b> ;Taf4;SREBP;jumu;l(3)neo38; <b>sr</b> ;CG31224; <b>cic</b> ; <b>cnc</b> ;REPTOR;Hr96; <b>kay</b> ;Med;Hr4;usp; <b>bi</b> ;CG12236;brk; <b>NFAT</b> ;CrebB;CoRest                                                   |
| enzyme binding                            | aru;capt; <b>Msp300</b> ;CG9175; <b>Ziz</b> ;emb;CG6746;Sirt1;CG10283;drl;CG10188;dia;CG30496;Ubc10; <b>GEFmeso</b> ; <b>Magi</b> ;RhoGEF3;ago;Ubc4;tral; <b>nuf</b> ; <b>Diap1</b> ; <b>CycT</b> ; <b>MYPT-75D</b> ; <b>siz</b> ;Spec2;Atg17; <b>pyd</b> ;Tctp;wkd;Lk6;CG17360; <b>eff</b> ;nsl1;Pak3;Mitofilin;ball; <b>spg</b> ;CG34133;Axn;CycG;CG11448;ph-p;Ubi-p5E;nej; <b>RhoU</b> ; <b>spri</b> ;Atg8a;Evi5; <b>Rok</b> ; <b>RhoGAP18B</b> ;dome;Cdc42; <b>pico</b> |
| transcription factor binding              | ebi;lilli;Sirt1;tup;Mondo; <b>EcR</b> ; <b>so</b> ;14-3-3zeta;HmgZ;E(bx);DOR; <b>DnaJ-1</b> ; <b>Gug</b> ; <b>h</b> ; <b>Tgi</b> ;Taf4;MED19;asf1;Taf1;14-3-3epsilon; <b>cic</b> ;TfIIA-S;Hr96; <b>kay</b> ;per;nej;Usp7; <b>NFAT</b> ;CoRest                                                                                                                                                                                                                               |
| sequence-specific DNA binding             | al; <b>cbt</b> ; <b>aop</b> ; <b>bowl</b> ; <b>Hnf4</b> ;GATAd; <b>CG9932</b> ;Smg5;crp; <b>Dif</b> ;tup; <b>EcR</b> ; <b>so</b> ;Pbp49;Camta;Mef2;chn;MESR4; <b>grh</b> ;Xbp1; <b>ken</b> ;Sox14;Dll;dar1;Pdp1;ERR; <b>h</b> ;klu;FoxK;eyg; <b>mirr</b> ;Taf1;JHDM2;jumu; <b>sqd</b> ;su(Hw);CG31224; <b>cic</b> ;Hr96;Hrb98DE; <b>kay</b> ;Med;Hr4;usp;per; <b>bi</b> ;CG3847;brk; <b>NFAT</b> ;mamo;CrebB; <b>Hers</b>                                                   |
| protein dimerization activity             | smo; <b>dpp</b> ;bun;crp;drl;CG9331;Mondo; <b>EcR</b> ;phtf;Camta;Mef2;14-3-3zeta;Sin3A; <b>grh</b> ;exu;cpa; <b>Hsp83</b> ; <b>h</b> ; <b>mirr</b> ;Taf4;SREBP; <b>corto</b> ;Pak3;14-3-3epsilon;subdued;slmb;mod(mdg4); <b>cnc</b> ;REPTOR;His2Av; <b>spz</b> ; <b>kay</b> ; <b>inc</b> ;usp;per;ctp;dome                                                                                                                                                                 |
| cytoskeletal protein binding              | aru;capt; <b>Msp300</b> ; <b>Myo31DF</b> ;Rab6; <b>ck</b> ;crp;Arpc2;dia; <b>shot</b> ;Mapmodulin;CG15097; <b>hts</b> ;cpa;RpL23; <b>zip</b> ;klar;Spn; <b>kst</b> ;CG32264; <b>form3</b> ;smg; <b>nuf</b> ; <b>Nedd4</b> ;chb;CG8176; <b>by</b> ; <b>Unc-115a</b> ; <b>Tm1</b> ; <b>jar</b> ;ssh; <b>Cad99C</b> ;tmod;Map205; <b>inc</b> ; <b>Actn</b> ; <b>Vinc</b> ;Kap3                                                                                                 |
| lipid binding                             | smo;l(2)gd1;dia;SCAP; <b>EcR</b> ;CG30493;Myd88; <b>CG5009</b> ; <b>kst</b> ;melt;ERR;Atg18a;SH3PX1; <b>itp-r83A</b> ;lap;CG8176;Akt1; <b>CG42668</b> ;ATPsynC;usp;CG32758;Clic;CG6299                                                                                                                                                                                                                                                                                      |
| protein-containing complex binding        | <b>dpp</b> ;Slh; <b>Msp300</b> ;Smg5; <b>ck</b> ;Arpc2; <b>hts</b> ;cpa;mi;CG3776;Spn;CG5989;Ubc4;Taf4;chb;kra;CG8176; <b>Unc-115a</b> ;Afti; <b>Tm1</b> ;Rab7; <b>jar</b> ; <b>LpR2</b> ;His2Av; <b>Actn</b> ; <b>Vinc</b> ;CG1354;Usp2                                                                                                                                                                                                                                    |
| kinase activity                           | Akap200;Pka-C1;p38b;drl; <b>Pdk</b> ;Pfk;SelD;l(2)k01209; <b>Sik3</b> ; <b>Magi</b> ;Slik; <b>fwd</b> ;CG11486;nmo;sti;CG42637;trc;Pitslre;Taf1;CG2846; <b>pyd</b> ;CG43143;Lk6;CG6218;Akt1;Pak3; <b>PKD</b> ; <b>CG31145</b> ;p38a;ball;yata; <b>kay</b> ;CycG;Tlk; <b>Dok</b> ;PhKgamma;CkIibeta; <b>Rok</b> ; <b>Pfrx</b>                                                                                                                                                |

| Enriched GO term (biological process)           | Genes                                                                                                                                                                                                                                                                                                                                                                                                                |
|-------------------------------------------------|----------------------------------------------------------------------------------------------------------------------------------------------------------------------------------------------------------------------------------------------------------------------------------------------------------------------------------------------------------------------------------------------------------------------|
| wing disc development                           | spen;smo;ebi;cbt;capt;frtz;Su(dx);Rab5;dpp;Slh;lilli;bowl;dpy;mts;Pka-C1;l(2)gd1;crol;p38b;ck;Gli;Socs36E;tup;spi;EcR;pk;Lpin;Pal1;Sin3A;arr;shot;Sox15;GEFmeso;cpa;dom;px;wmd;pio;Dll;zip;sty;nmo;Gug;RasGAP1;eyg;mirr;nuf;Arl1;Notum;Nedd4;Ndfip;MYPT-75D;trc;CG11399;corto;pyd;by;jumu;Cyp9f2;mor;tara;14-3-3epsilon;Ppcs;Hs6st;cic;unk;Rab7;scrib;kay;RpS28a;Axn;Med;bi;ctp;brk;Dok;Gclc;Pp2B-14D;Rok;dome;Cdc42 |
| post-embryonic animal organ development         | spen;smo;al;ebi;cbt;frtz;Su(dx);Rab5;dpp;bowl;dpy;Msp300;Pka-C1;CG4036;Myo31DF;l(2)gd1;crol;p38b;ck;Gli;crp;Dif;Socs36E;spi;EcR;pk;so;Lpin;Pal1;Sin3A;arr;shot;chn;GEFmeso;px;wmd;pio;Dll;zip;klar;sty;nmo;Gug;RasGAP1;mirr;Diap1;Nedd4;MYPT-75D;CG42637;trc;corto;Kdm2;by;jumu;nsl1;mor;Ppcs;Hs6st;cic;unk;jar;scrib;Ti;spz;kay;Axn;Med;bi;ctp;brk;Dok;Gclc;Rok;dome;Cdc42                                          |
| regionalization                                 | spen;smo;cbt;capt;Su(dx);Rab5;dpp;Slh;lilli;bowl;mts;Pka-C1;Rab6;ck;Gli;tup;brat;EcR;pk;lig;Lpin;gcl;Myd88;TER94;fra;arr;pAbp;GEFmeso;CalpA;exu;dom;Dll;zip;klar;dos;Hsp83;sty;Dhc64C;nmo;Gug;h;RasGAP1;klu;Ptip;nuf;Notum;CG11399;lost;corto;Kdm2;wkd;glo;sqd;jvl;Tm1;ea;mor;tara;14-3-3epsilon;cic;slmb;cnc;Rab7;scrib;Ti;spz;Axn;Med;csw;bi;spoon;brk;fs(1)h;CkIibeta;dome                                        |
| metamorphosis                                   | spen;smo;al;ebi;cbt;frtz;Su(dx);Rab5;dpp;bowl;dpy;Pka-C1;Myo31DF;l(2)gd1;crol;p38b;ck;Gli;Dif;Socs36E;spi;EcR;pk;so;Lpin;Pal1;TER94;arr;shot;GEFmeso;px;wmd;Sox14;EbpIII;pio;Dll;zip;sty;nmo;Atg18a;Gug;RasGAP1;mirr;Diap1;Nedd4;MYPT-75D;trc;corto;Itp-r83A;Atg17;bv;jumu;mor;Mdh2;Ppcs;Hs6st;cic;unk;jar;scrib;kay;Axn;Med;usp;bi;ctp;brk;Dok;Gclc;Atg8a;Rok;dome;Cdc42                                            |
| appendage development                           | spen;smo;al;ebi;cbt;frtz;Su(dx);Rab5;dpp;bowl;dpy;Pka-C1;l(2)gd1;crol;p38b;ck;Gli;Socs36E;drl;spi;EcR;pk;Lpin;Pal1;arr;shot;GEFmeso;px;wmd;pio;Dll;zip;sty;nmo;Gug;RasGAP1;eyg;mirr;Diap1;Nedd4;MYPT-75D;trc;corto;by;jumu;mor;Ppcs;Hs6st;cic;unk;scrib;Axn;Med;bi;ctp;brk;Dok;Gclc;Rok;Cdc42                                                                                                                        |
| sensory organ development                       | spen;smo;al;ebi;cbt;capt;aop;dpp;lilli;mts;Sirup;Pka-C1;l(2)gd1;Rab6;bun;ck;Socs36E;tup;spi;pk;so;fra;NAT1;arr;shot;Sox15;chn;grh;pAbp;Gp150;zip;klar;Rap1;dos;sty;melt;nmo;Gug;h;RasGAP1;klu;eyg;mirr;nuf;mib1;Diap1;Dab;Krn;trc;RpL13A;jagn;pyd;jumu;SeiR;Afti;eff;Ppcs;Hs6st;cic;unk;ssh;scrib;Hrb98DE;spg;kay;csw;Rala;bi;ctp;nej;Rok;dome;Cdc42                                                                 |
| epithelial tube morphogenesis                   | spen;smo;al;ebi;cbt;frtz;Su(dx);Rab5;dpp;bowl;dpy;Pka-C1;Myo31DF;l(2)gd1;crol;p38b;ck;Gli;Socs36E;spi;EcR;pk;so;Lpin;Pal1;arr;shot;GEFmeso;px;wmd;Slik;pio;Dll;zip;sty;ago;form3;nmo;Gug;RasGAP1;mirr;Diap1;Nedd4;MYPT-75D;CG42637;trc;corto;pyd;by;dmt;jumu;mor;Ppcs;Vha13;Hs6st;cic;unk;jar;scrib;kay;Axn;Med;VhaAC39-1;bi;ctp;brk;Dok;Gclc;Rok;dome;Cdc42                                                         |
| post-embryonic animal morphogenesis             | spen;smo;al;ebi;cbt;frtz;Su(dx);Rab5;dpp;bowl;dpy;Pka-C1;Myo31DF;l(2)gd1;crol;p38b;ck;Gli;Dif;Socs36E;spi;EcR;pk;so;Lpin;Pal1;TER94;arr;shot;GEFmeso;px;wmd;pio;Dll;zip;sty;nmo;Atg18a;Gug;RasGAP1;mirr;Diap1;Nedd4;MYPT-75D;trc;corto;Itp-r83A;Atg17;by;jumu;mor;Mdh2;Ppcs;Hs6st;cic;unk;jar;scrib;kay;Axn;Med;bi;ctp;brk;Dok;Gclc;Atg8a;Rok;dome;Cdc42                                                             |
| negative regulation of response to stimulus     | ebi;Su(dx);aop;mts;Akap200;Pka-C1;l(2)gd1;crol;bun;Socs36E;drl;pk;LRR;lig;Lpin;gcl;TER94;Sin3A;MESR4;Sik3;cpa;pirk;wdp;Sesn;ken;E(bx);sty;ImpL2;ago;DnaJ-1;scny;nmo;Atg18a;Gug;PGRP-LA;PGRP-LF;RasGAP1;scyl;chrb;Notum;Nedd4;asf1;Spn77Ba;chb;Ubc6;Lk6;eff;CG5044;Akt1;slmb;Rassf;Pli;p38a;ssh;Axn;Hr4;Rala;CG4096;brk;nej;NFAT;Rok;kek5;Usp2                                                                        |
| regulation of intracellular signal transduction | smo;ebi;aru;dpp;Ziz;mts;Akap200;Socs36E;drl;CG10188;spi;LRR;lig;Lpin;Myd88;14-3-3zeta;MESR4;slim;GEFmeso;Sik3;cpa;wdp;Sesn;ken;E(bx);RhoGEF3;Rap1;dos;sty;ImpL2;melt;Atg18a;PGRP-LF;scyl;chrb;siz;chb;Ubc6;Spec2;pyd;Lk6;Pp1-87B;Akt1;Pak3;14-3-3epsilon;slmb;Rassf;ssh;XNP;scrib;spg;CycG;Rala;spoon;spri;NFAT;rut;Cdc42                                                                                            |

**Supplementary Table 8** Genes showing increase by optogenetic activation.

The genes showed statistically significant increase after 5 min light illumination followed by 10 min rest were determined by DESeq2.

| Gene Symbol | q.value   | log2      | CoRest-C<br>bound<br>(338/1582) | CBP bound<br>(1055/1582) | Rpd3<br>bound<br>(606/1582) | all<br>colocalized<br>(235/1582) |
|-------------|-----------|-----------|---------------------------------|--------------------------|-----------------------------|----------------------------------|
| DnaJ-1      | 0         | 3.4216922 | +                               | +                        | +                           | +                                |
| Hsp83       | 0         | 2.6751262 | +                               | +                        | +                           | +                                |
| Hsromega    | 2.44E-140 | 1.9288177 | +                               | +                        | +                           | +                                |
| bmm         | 3.302E-88 | 1.8142158 | +                               | +                        | +                           | +                                |
| Pdk         | 4.202E-95 | 1.7280181 | +                               | +                        | +                           | +                                |
| Lsd-2       | 9.295E-52 | 1.3953836 | +                               | +                        | +                           | +                                |
| CG14259     | 1.982E-52 | 1.3404234 | +                               | +                        | +                           | +                                |
| CG7033      | 5.116E-36 | 1.2501684 | +                               | +                        | +                           | +                                |
| ken         | 7.744E-10 | 1.1476486 | +                               | +                        | +                           | +                                |
| h           | 2.18E-22  | 1.115911  | +                               | +                        | +                           | +                                |
| whd         | 1.532E-25 | 1.0969557 | +                               | +                        | +                           | +                                |
| CG6785      | 1.689E-08 | 1.093644  | +                               | +                        | +                           | +                                |
| ced-6       | 1.262E-27 | 1.0754023 | +                               | +                        | +                           | +                                |
| CG10348     | 4.727E-15 | 1.0753352 | +                               | +                        | +                           | +                                |
| att-ORFA    | 3.543E-09 | 1.0159564 | +                               | +                        | +                           | +                                |
| CG13893     | 3.223E-18 | 0.993227  | +                               | +                        | +                           | +                                |
| CG15673     | 5.487E-23 | 0.9441159 | +                               | +                        | +                           | +                                |
| ck          | 5.712E-10 | 0.9175971 | +                               | +                        | +                           | +                                |
| cbt         | 1.519E-16 | 0.8846943 | +                               | +                        | +                           | +                                |
| klu         | 8.112E-06 | 0.8797964 | +                               | +                        | +                           | +                                |
| dmt         | 2.104E-06 | 0.8791368 | +                               | +                        | +                           | +                                |
| Tis11       | 1.835E-16 | 0.8779546 | +                               | +                        | +                           | +                                |
| CG10600     | 8.807E-12 | 0.8645571 | +                               | +                        | +                           | +                                |
| chas        | 1.174E-09 | 0.8202687 | +                               | +                        | +                           | +                                |
| Hers        | 9.244E-06 | 0.8139233 | +                               | +                        | +                           | +                                |
| CR43314     | 5.287E-10 | 0.8107388 | +                               | +                        | +                           | +                                |
| MRP         | 6.597E-11 | 0.7933821 | +                               | +                        | +                           | +                                |
| CG9812      | 7.846E-18 | 0.7800547 | +                               | +                        | +                           | +                                |
| ImpL2       | 2.256E-17 | 0.7770316 | +                               | +                        | +                           | +                                |
| CG5953      | 1.022E-09 | 0.7554061 | +                               | +                        | +                           | +                                |
| Notum       | 0.0072918 | 0.7553727 | +                               | +                        | +                           | +                                |
| Jafrac1     | 9.437E-16 | 0.7545314 | +                               | +                        | +                           | +                                |
| CG6767      | 3.801E-10 | 0.737051  | +                               | +                        | +                           | +                                |
| emp         | 7.295E-12 | 0.7361563 | +                               | +                        | +                           | +                                |
| pk          | 2.217E-07 | 0.7289841 | +                               | +                        | +                           | +                                |
| Pino        | 9.015E-15 | 0.7228043 | +                               | +                        | +                           | +                                |
| cdc14       | 5.957E-10 | 0.7226957 | +                               | +                        | +                           | +                                |
| grh         | 7.262E-12 | 0.7128377 | +                               | +                        | +                           | +                                |
| CG5973      | 5.417E-18 | 0.6958718 | +                               | +                        | +                           | +                                |
| Dll         | 4.677E-08 | 0.6939546 | +                               | +                        | +                           | +                                |
| CG9932      | 5.662E-11 | 0.6800857 | +                               | +                        | +                           | +                                |
| drongo      | 2.219E-06 | 0.6744075 | +                               | +                        | +                           | +                                |
| CG32103     | 2.548E-13 | 0.6731429 | +                               | +                        | +                           | +                                |
| CG33178     | 7.109E-09 | 0.6681518 | +                               | +                        | +                           | +                                |
| nahoda      | 7.739E-06 | 0.6679851 | +                               | +                        | +                           | +                                |
| CG6231      | 1.662E-07 | 0.667901  | +                               | +                        | +                           | +                                |
| CG43427     | 1.57E-06  | 0.6634732 | +                               | +                        | +                           | +                                |
| siz         | 5.773E-06 | 0.6631415 | +                               | +                        | +                           | +                                |
| bowl        | 0.0005089 | 0.6603608 | +                               | +                        | +                           | +                                |
| RhoU        | 0.0053187 | 0.6603003 | +                               | +                        | +                           | +                                |
| Cad99C      | 9.818E-06 | 0.6532968 | +                               | +                        | +                           | +                                |



|          |           |           |   |   |   |   |
|----------|-----------|-----------|---|---|---|---|
| CG17896  | 1.477E-12 | 0.651285  | + | + | + | + |
| Cyt-b5   | 4.734E-14 | 0.6487456 | + | + | + | + |
| GstD1    | 8.775E-16 | 0.6476504 | + | + | + | + |
| mirr     | 0.0002295 | 0.6414534 | + | + | + | + |
| CG6959   | 2.661E-07 | 0.6397509 | + | + | + | + |
| wdp      | 5.122E-08 | 0.6370918 | + | + | + | + |
| Hnf4     | 2.343E-08 | 0.6365088 | + | + | + | + |
| bbg      | 0.0003063 | 0.6362856 | + | + | + | + |
| fus      | 4.955E-06 | 0.633616  | + | + | + | + |
| CR42862  | 3.058E-10 | 0.6314933 | + | + | + | + |
| MYPT-75D | 5.884E-08 | 0.6307827 | + | + | + | + |
| GstT3    | 8.01E-06  | 0.6307402 | + | + | + | + |
| CG8596   | 5.09E-07  | 0.626466  | + | + | + | + |
| Tgi      | 5.584E-08 | 0.6251766 | + | + | + | + |
| mthl10   | 0.0005955 | 0.6210502 | + | + | + | + |
| CG5346   | 6.686E-08 | 0.61158   | + | + | + | + |
| Ziz      | 5.451E-06 | 0.6088291 | + | + | + | + |
| RasGAP1  | 0.0005179 | 0.6020787 | + | + | + | + |
| CG32276  | 6.971E-08 | 0.6001167 | + | + | + | + |
| CG12075  | 0.0004445 | 0.5992837 | + | + | + | + |
| dpp      | 5.099E-06 | 0.5935855 | + | + | + | + |
| LpR2     | 5.777E-05 | 0.5916319 | + | + | + | + |
| Lmpt     | 3.996E-11 | 0.5864842 | + | + | + | + |
| PGRP-LF  | 0.0005137 | 0.5861127 | + | + | + | + |
| sr       | 0.0092355 | 0.5854005 | + | + | + | + |
| GstT4    | 5.303E-10 | 0.5793712 | + | + | + | + |
| Sox14    | 0.0003545 | 0.5783105 | + | + | + | + |
| fra      | 0.0006242 | 0.5754807 | + | + | + | + |
| bi       | 0.0023647 | 0.575342  | + | + | + | + |
| Sesn     | 7.287E-09 | 0.5718267 | + | + | + | + |
| shot     | 1.143E-10 | 0.5683081 | + | + | + | + |
| pirk     | 0.0232515 | 0.5668801 | + | + | + | + |
| kay      | 9.796E-05 | 0.5653496 | + | + | + | + |
| CG14200  | 0.0001536 | 0.5638811 | + | + | + | + |
| CG17734  | 9.348E-08 | 0.5630141 | + | + | + | + |
| pio      | 8.052E-09 | 0.5629224 | + | + | + | + |
| Gli      | 0.0024634 | 0.562179  | + | + | + | + |
| ltp-r83A | 0.0002069 | 0.559498  | + | + | + | + |
| Sik3     | 0.0023034 | 0.5547132 | + | + | + | + |
| CG12581  | 4.579E-05 | 0.5493135 | + | + | + | + |
| CG17839  | 2.035E-06 | 0.5482652 | + | + | + | + |
| CG33111  | 0.0001189 | 0.546928  | + | + | + | + |
| Mocs1    | 2.79E-05  | 0.5455171 | + | + | + | + |
| aop      | 5.71E-05  | 0.5452879 | + | + | + | + |
| papi     | 3.64E-05  | 0.5448706 | + | + | + | + |
| CG7337   | 1.409E-06 | 0.5439602 | + | + | + | + |
| nrv1     | 5.214E-05 | 0.5432995 | + | + | + | + |
| CG12065  | 0.000631  | 0.5406569 | + | + | + | + |
| Diap1    | 3.734E-07 | 0.5402352 | + | + | + | + |
| GILT1    | 3.55E-07  | 0.5365792 | + | + | + | + |
| so       | 0.0006961 | 0.5364171 | + | + | + | + |
| jvl      | 1.748E-06 | 0.528381  | + | + | + | + |
| CG8399   | 5.308E-06 | 0.5275453 | + | + | + | + |
| CG3164   | 1.82E-06  | 0.5216386 | + | + | + | + |
| Msp300   | 3.081E-06 | 0.5162733 | + | + | + | + |
| CG9119   | 0.0018638 | 0.5137569 | + | + | + | + |
| w        | 0.0002118 | 0.5088074 | + | + | + | + |
| CG4313   | 0.0032588 | 0.5074011 | + | + | + | + |

|            |           |           |   |   |   |   |
|------------|-----------|-----------|---|---|---|---|
| CG5009     | 5.387E-07 | 0.5057667 | + | + | + | + |
| CG31955    | 0.0058591 | 0.5044311 | + | + | + | + |
| Gp150      | 5.009E-08 | 0.5006437 | + | + | + | + |
| Pde11      | 4.113E-06 | 0.4992967 | + | + | + | + |
| Magi       | 0.0020443 | 0.4989076 | + | + | + | + |
| EcR        | 0.0003491 | 0.4984095 | + | + | + | + |
| pico       | 0.0004338 | 0.4956375 | + | + | + | + |
| CalpA      | 0.0003149 | 0.4955735 | + | + | + | + |
| spg        | 0.0098288 | 0.4945892 | + | + | + | + |
| Fit1       | 0.0008709 | 0.4935844 | + | + | + | + |
| CG6770     | 0.0004034 | 0.4900305 | + | + | + | + |
| lilli      | 0.0007066 | 0.4895356 | + | + | + | + |
| NFAT       | 5.841E-05 | 0.487447  | + | + | + | + |
| Zip89B     | 0.0056126 | 0.4849378 | + | + | + | + |
| form3      | 2.231E-05 | 0.4832382 | + | + | + | + |
| vari       | 0.0001577 | 0.4794743 | + | + | + | + |
| CycT       | 7.955E-06 | 0.478123  | + | + | + | + |
| T48        | 0.0017636 | 0.4779023 | + | + | + | + |
| Dif        | 3.648E-05 | 0.4753232 | + | + | + | + |
| Oda        | 1.266E-09 | 0.4738718 | + | + | + | + |
| alpha-Est8 | 6.68E-05  | 0.4726668 | + | + | + | + |
| cnc        | 2.784E-06 | 0.4725418 | + | + | + | + |
| CG18812    | 6.869E-05 | 0.4717637 | + | + | + | + |
| Trf4-1     | 3.634E-06 | 0.4697376 | + | + | + | + |
| CG32369    | 0.0138384 | 0.4676699 | + | + | + | + |
| spz        | 0.003605  | 0.4664343 | + | + | + | + |
| zip        | 4.806E-05 | 0.4634142 | + | + | + | + |
| CG5853     | 4.603E-06 | 0.4622885 | + | + | + | + |
| CG2519     | 1.583E-05 | 0.460666  | + | + | + | + |
| by         | 8.803E-05 | 0.4596426 | + | + | + | + |
| pain       | 1.258E-05 | 0.4596156 | + | + | + | + |
| fz4        | 0.0478105 | 0.4594165 | + | + | + | + |
| Nedd4      | 0.0017262 | 0.4593378 | + | + | + | + |
| Ppa        | 0.0068902 | 0.4584259 | + | + | + | + |
| scyl       | 3.154E-06 | 0.4530075 | + | + | + | + |
| CG6700     | 0.0005154 | 0.4517847 | + | + | + | + |
| CG5618     | 3.218E-05 | 0.4463937 | + | + | + | + |
| Gug        | 0.000681  | 0.4445698 | + | + | + | + |
| scrib      | 5.074E-06 | 0.4444619 | + | + | + | + |
| CG9171     | 0.0044949 | 0.4432674 | + | + | + | + |
| fwd        | 0.0014688 | 0.4399271 | + | + | + | + |
| CG7879     | 0.004631  | 0.4310095 | + | + | + | + |
| CG6398     | 0.0014074 | 0.4295643 | + | + | + | + |
| CG6178     | 0.0232285 | 0.427362  | + | + | + | + |
| CG11151    | 0.0007449 | 0.426495  | + | + | + | + |
| cry        | 0.000375  | 0.4241443 | + | + | + | + |
| CG3091     | 0.0006492 | 0.4233705 | + | + | + | + |
| spri       | 0.0080477 | 0.4211938 | + | + | + | + |
| mld        | 0.0016039 | 0.4200796 | + | + | + | + |
| CG14661    | 4.139E-07 | 0.4199988 | + | + | + | + |
| Reg-5      | 2.892E-05 | 0.4163615 | + | + | + | + |
| kst        | 8.569E-05 | 0.4159107 | + | + | + | + |
| CG32137    | 0.0016876 | 0.4114021 | + | + | + | + |
| CG5010     | 2.25E-05  | 0.4102484 | + | + | + | + |
| cic        | 0.0122121 | 0.4068925 | + | + | + | + |
| Drat       | 1.704E-06 | 0.4007799 | + | + | + | + |
| cv         | 0.0007887 | 0.4007598 | + | + | + | + |
| pyd        | 0.0006544 | 0.3991508 | + | + | + | + |

|             |           |           |   |   |   |   |
|-------------|-----------|-----------|---|---|---|---|
| Myo31DF     | 0.010445  | 0.3975111 | + | + | + | + |
| eIF4G2      | 8.361E-05 | 0.3972229 | + | + | + | + |
| Pu          | 1.043E-05 | 0.3891995 | + | + | + | + |
| CG34348     | 0.0090145 | 0.3883874 | + | + | + | + |
| CG12991     | 0.0015823 | 0.3872764 | + | + | + | + |
| CG32138     | 0.0012816 | 0.3864364 | + | + | + | + |
| Xrp1        | 5.961E-05 | 0.3863007 | + | + | + | + |
| ATP8B       | 0.0018609 | 0.3860515 | + | + | + | + |
| TI          | 0.0060302 | 0.3857363 | + | + | + | + |
| Gclc        | 0.0247775 | 0.3854937 | + | + | + | + |
| Vap-33B     | 0.0071502 | 0.3840271 | + | + | + | + |
| hang        | 0.0006183 | 0.3836463 | + | + | + | + |
| CG32486     | 5.612E-05 | 0.3831538 | + | + | + | + |
| lawc        | 0.0038117 | 0.3793063 | + | + | + | + |
| CG6051      | 0.0373158 | 0.3779457 | + | + | + | + |
| Vinc        | 0.0065335 | 0.3758479 | + | + | + | + |
| Zip99C      | 0.0018561 | 0.3757047 | + | + | + | + |
| Tep3        | 0.0038753 | 0.3724598 | + | + | + | + |
| CG31211     | 0.0002411 | 0.3691363 | + | + | + | + |
| inc         | 0.004709  | 0.3680213 | + | + | + | + |
| CG8738      | 0.0242539 | 0.3640502 | + | + | + | + |
| Ef1alpha48D | 4.276E-06 | 0.3640362 | + | + | + | + |
| Msr-110     | 0.0014011 | 0.3614324 | + | + | + | + |
| Cyp9f2      | 9.796E-05 | 0.355976  | + | + | + | + |
| PKD         | 0.0218887 | 0.3553139 | + | + | + | + |
| Pfrx        | 0.0012816 | 0.353133  | + | + | + | + |
| Dmtn        | 0.0135603 | 0.3527875 | + | + | + | + |
| fok         | 0.001745  | 0.3519137 | + | + | + | + |
| Tm1         | 0.0008001 | 0.3491019 | + | + | + | + |
| CG8839      | 0.0029073 | 0.3484305 | + | + | + | + |
| simj        | 0.0178637 | 0.34752   | + | + | + | + |
| CG18507     | 0.0025541 | 0.3469172 | + | + | + | + |
| RhoGAP18B   | 0.016123  | 0.3364359 | + | + | + | + |
| Rok         | 0.0270608 | 0.3354933 | + | + | + | + |
| Flo2        | 0.0402892 | 0.3353432 | + | + | + | + |
| Ran         | 0.0033338 | 0.3349718 | + | + | + | + |
| corto       | 0.0168375 | 0.3329261 | + | + | + | + |
| Unc-115a    | 0.0281107 | 0.3322192 | + | + | + | + |
| Lpin        | 0.0010321 | 0.327714  | + | + | + | + |
| CG8814      | 0.0167564 | 0.3250776 | + | + | + | + |
| CG9821      | 0.0072009 | 0.3231785 | + | + | + | + |
| Glut4EF     | 0.0015335 | 0.3116447 | + | + | + | + |
| jar         | 0.0040599 | 0.3108267 | + | + | + | + |
| CG31145     | 0.0103098 | 0.3102253 | + | + | + | + |
| TER94       | 0.0111149 | 0.3078768 | + | + | + | + |
| CG31103     | 0.0087696 | 0.306157  | + | + | + | + |
| tna         | 0.0032185 | 0.3040672 | + | + | + | + |
| CG3961      | 0.0260779 | 0.2954547 | + | + | + | + |
| GEFmeso     | 0.0392546 | 0.2919441 | + | + | + | + |
| hts         | 0.0212407 | 0.2914401 | + | + | + | + |
| CG42668     | 0.0156173 | 0.2816664 | + | + | + | + |
| CG6966      | 0.0277288 | 0.280558  | + | + | + | + |
| CG32521     | 0.0407854 | 0.279576  | + | + | + | + |
| sqd         | 0.005177  | 0.278261  | + | + | + | + |
| pAbp        | 0.0423732 | 0.2758755 | + | + | + | + |
| Vha68-2     | 0.0220193 | 0.2757904 | + | + | + | + |
| Inx3        | 0.014601  | 0.2750954 | + | + | + | + |
| eff         | 0.0454723 | 0.2745361 | + | + | + | + |

|          |           |           |   |   |   |   |
|----------|-----------|-----------|---|---|---|---|
| Actn     | 0.0318768 | 0.2652867 | + | + | + | + |
| nuf      | 0.0186262 | 0.2613968 | + | + | + | + |
| Xbp1     | 0.0040064 | 0.2605162 | + | + | + | + |
| csw      | 0.0197929 | 0.2546066 | + | + | + | + |
| CG31038  | 0.044706  | 0.2491072 | + | + | + | + |
| Mgstl    | 0.0382923 | 0.2460354 | + | + | + | + |
| Sod      | 0.0265701 | 0.2315371 | + | + | + | + |
| SeiR     | 0.0437858 | 0.2152736 | + | + | + | + |
| ovo      | 6.082E-14 | 1.0049452 | + | + | + | - |
| Aldh-III | 1.81E-15  | 0.721551  | + | + | + | - |
| cv-2     | 4.523E-06 | 0.7156691 | + | + | + | - |
| Snoo     | 5.75E-07  | 0.693172  | + | + | + | - |
| Vha100-2 | 1.664E-10 | 0.6755643 | + | + | + | - |
| eas      | 1.022E-09 | 0.6491915 | + | + | + | - |
| chic     | 2.13E-13  | 0.612756  | + | + | + | - |
| Dad      | 0.0007159 | 0.5972617 | + | + | + | - |
| Doa      | 3.853E-08 | 0.5969499 | + | + | + | - |
| Cerk     | 5.714E-10 | 0.5742689 | + | + | + | - |
| CG45186  | 1.206E-06 | 0.5495608 | + | + | + | - |
| shn      | 7.135E-06 | 0.5315449 | + | + | + | - |
| hid      | 0.0004053 | 0.5185574 | + | + | + | - |
| Cpr      | 5.652E-08 | 0.5056746 | + | + | + | - |
| Syp      | 2.036E-06 | 0.4874295 | + | + | + | - |
| kibra    | 0.0001547 | 0.4718546 | + | + | + | - |
| crc      | 8.315E-06 | 0.4313451 | + | + | + | - |
| gish     | 9.768E-06 | 0.4270215 | + | + | + | - |
| Gbs-70E  | 0.0006659 | 0.3421022 | + | + | + | - |
| vir-1    | 0.0062317 | 0.2773876 | + | + | + | - |
| gem      | 0.0135603 | 0.2576038 | + | + | + | - |
| Dok      | 0.0003415 | 0.6914229 | + | + | - | + |
| Hsp70Bb  | 8.796E-10 | 1.7989018 | + | + | - | - |
| CG14966  | 7.218E-10 | 1.4243405 | + | + | - | - |
| Cpr97Eb  | 5.365E-54 | 1.2822401 | + | + | - | - |
| CG5966   | 6.518E-17 | 1.2764771 | + | + | - | - |
| CG13676  | 1.597E-16 | 1.0407076 | + | + | - | - |
| ttk      | 1.043E-17 | 1.0144604 | + | + | - | - |
| Cad74A   | 9.277E-07 | 1.0131313 | + | + | - | - |
| ec       | 7.175E-15 | 1.0005762 | + | + | - | - |
| CG31028  | 3.154E-06 | 0.9551563 | + | + | - | - |
| dsx      | 1.966E-16 | 0.9413354 | + | + | - | - |
| spz3     | 8.543E-06 | 0.8877477 | + | + | - | - |
| CG9153   | 2.778E-12 | 0.8322067 | + | + | - | - |
| CG1441   | 1.003E-17 | 0.8314957 | + | + | - | - |
| GV1      | 3.028E-12 | 0.8213351 | + | + | - | - |
| Drak     | 1.556E-09 | 0.8059434 | + | + | - | - |
| Vdup1    | 3.55E-18  | 0.8041286 | + | + | - | - |
| d        | 0.002006  | 0.7978247 | + | + | - | - |
| CR32385  | 0.0046411 | 0.789117  | + | + | - | - |
| CG6040   | 4.888E-12 | 0.7890818 | + | + | - | - |
| CG11791  | 1.826E-14 | 0.7781757 | + | + | - | - |
| ASPP     | 9.822E-06 | 0.7640733 | + | + | - | - |
| CG11069  | 1.985E-05 | 0.7543739 | + | + | - | - |
| wg       | 0.0085692 | 0.7391351 | + | + | - | - |
| Ets98B   | 5.287E-11 | 0.7217472 | + | + | - | - |
| AOX3     | 1.955E-12 | 0.7176692 | + | + | - | - |
| Eip74EF  | 3.063E-08 | 0.7088742 | + | + | - | - |
| trx      | 1.728E-07 | 0.6852514 | + | + | - | - |
| Indy     | 4.797E-13 | 0.6594897 | + | + | - | - |

|           |           |           |   |   |   |   |
|-----------|-----------|-----------|---|---|---|---|
| uif       | 1.12E-07  | 0.6563893 | + | + | - | - |
| pan       | 8.465E-14 | 0.6561491 | + | + | - | - |
| CG3011    | 7.594E-10 | 0.6487406 | + | + | - | - |
| ft        | 0.0032021 | 0.6424647 | + | + | - | - |
| CR32111   | 0.001799  | 0.6153138 | + | + | - | - |
| CG6923    | 0.0005648 | 0.6143827 | + | + | - | - |
| Lasp      | 5.685E-05 | 0.607702  | + | + | - | - |
| mew       | 0.0008518 | 0.6005281 | + | + | - | - |
| ScpX      | 7.822E-07 | 0.5961853 | + | + | - | - |
| gce       | 3.426E-08 | 0.5834436 | + | + | - | - |
| caps      | 0.0014446 | 0.5621391 | + | + | - | - |
| zormin    | 8.386E-07 | 0.5574447 | + | + | - | - |
| Mfe2      | 9.588E-07 | 0.5554243 | + | + | - | - |
| Snp       | 8.316E-07 | 0.5527218 | + | + | - | - |
| pdm3      | 4.291E-05 | 0.5272688 | + | + | - | - |
| hth       | 1.027E-07 | 0.5188299 | + | + | - | - |
| Fhos      | 0.0004589 | 0.5173864 | + | + | - | - |
| sd        | 7.258E-06 | 0.5036785 | + | + | - | - |
| Hil       | 3.273E-05 | 0.5018236 | + | + | - | - |
| tx        | 0.0226937 | 0.4859953 | + | + | - | - |
| Amph      | 2.649E-07 | 0.4855182 | + | + | - | - |
| Pld       | 0.040752  | 0.4763237 | + | + | - | - |
| Galpai    | 0.0009653 | 0.4692141 | + | + | - | - |
| MESK2     | 2.176E-05 | 0.4668025 | + | + | - | - |
| par-1     | 8.66E-07  | 0.456008  | + | + | - | - |
| tws       | 0.0007867 | 0.4388666 | + | + | - | - |
| CG15556   | 0.020556  | 0.4347112 | + | + | - | - |
| Lac       | 0.0033115 | 0.4251853 | + | + | - | - |
| CG7016    | 0.0141972 | 0.4151349 | + | + | - | - |
| Atg13     | 0.009355  | 0.4072138 | + | + | - | - |
| CREG      | 0.0373865 | 0.3950782 | + | + | - | - |
| Ddc       | 0.0005154 | 0.3775674 | + | + | - | - |
| SmD3      | 0.007532  | 0.3597041 | + | + | - | - |
| CG31121   | 0.0168727 | 0.3588209 | + | + | - | - |
| CG33144   | 0.0110567 | 0.3428259 | + | + | - | - |
| Strn-Mlck | 0.0080688 | 0.3339349 | + | + | - | - |
| Tpr2      | 0.0082458 | 0.3337223 | + | + | - | - |
| gpp       | 0.0160453 | 0.3183263 | + | + | - | - |
| GstE9     | 0.0448536 | 0.3118141 | + | + | - | - |
| hipk      | 0.0103194 | 0.3105552 | + | + | - | - |
| CG43078   | 0.0066585 | 0.3052688 | + | + | - | - |
| grass     | 0.0262768 | 0.2956737 | + | + | - | - |
| Mob2      | 0.0043836 | 0.2699402 | + | + | - | - |
| Rho1      | 0.0192993 | 0.2593045 | + | + | - | - |
| SPoCk     | 0.01925   | 0.2447858 | + | + | - | - |
| psq       | 0.0294297 | 0.2435207 | + | + | - | - |
| RhoGDI    | 0.0420851 | 0.2238574 | + | + | - | - |
| bif       | 0.0354498 | 0.2130016 | + | + | - | - |
| CG13531   | 0.0051238 | 0.4501562 | + | - | + | + |
| Drice     | 0.0252799 | 0.4733977 | + | - | + | - |
| Srp14     | 0.0458412 | 0.4449812 | + | - | + | - |
| mbf1      | 4.463E-31 | 1.2538188 | + | - | - | - |
| CG5608    | 4.07E-11  | 1.0487676 | + | - | - | - |
| l(2)gl    | 0.0093824 | 0.4062685 | + | - | - | - |
| sli       | 0.0114538 | 0.3783871 | + | - | - | - |
| Hsp70Aa   | 1.54E-182 | 5.249882  | - | + | + | - |
| Hsp70Ab   | 8.73E-225 | 5.0693914 | - | + | + | - |
| stv       | 0         | 3.5873949 | - | + | + | - |

|             |           |           |   |   |   |   |
|-------------|-----------|-----------|---|---|---|---|
| Hsc70Cb     | 2.005E-93 | 1.881285  | - | + | + | - |
| tra         | 3.782E-68 | 1.833602  | - | + | + | - |
| Hop         | 2.744E-80 | 1.7868571 | - | + | + | - |
| CR44768     | 3.262E-12 | 1.5496639 | - | + | + | - |
| Nop17l      | 1.14E-35  | 1.5210371 | - | + | + | - |
| LamC        | 3.544E-27 | 1.3917414 | - | + | + | - |
| IP3K2       | 5.542E-41 | 1.3774959 | - | + | + | - |
| Gllspla2    | 1.483E-30 | 1.3079519 | - | + | + | - |
| CG13639     | 0.0003527 | 1.1792888 | - | + | + | - |
| foxo        | 5.662E-21 | 1.1488679 | - | + | + | - |
| sgl         | 1.035E-22 | 1.1361298 | - | + | + | - |
| CG16721     | 1.936E-23 | 1.1257728 | - | + | + | - |
| nkd         | 1.022E-09 | 1.0741936 | - | + | + | - |
| Hsc70-4     | 2.79E-24  | 1.0578546 | - | + | + | - |
| B-H2        | 1.208E-06 | 1.031323  | - | + | + | - |
| CG8258      | 3.198E-20 | 1.024122  | - | + | + | - |
| Trxr-1      | 1.285E-36 | 1.0236963 | - | + | + | - |
| CG8312      | 6.492E-18 | 1.0038387 | - | + | + | - |
| CR45668     | 3.072E-21 | 0.9907806 | - | + | + | - |
| Gfat1       | 2.935E-16 | 0.949564  | - | + | + | - |
| sni         | 3.644E-08 | 0.9267861 | - | + | + | - |
| alpha-Est10 | 1.7E-11   | 0.9137846 | - | + | + | - |
| PRL-1       | 1.909E-10 | 0.8997211 | - | + | + | - |
| CG17928     | 5.662E-21 | 0.8963167 | - | + | + | - |
| ena         | 1.215E-09 | 0.8882745 | - | + | + | - |
| Ubi-p63E    | 1.26E-22  | 0.8631942 | - | + | + | - |
| CR45646     | 0.01242   | 0.850061  | - | + | + | - |
| olf186-M    | 2.271E-12 | 0.8380825 | - | + | + | - |
| CG9990      | 8.392E-13 | 0.8380228 | - | + | + | - |
| Eip93F      | 9.759E-18 | 0.8302103 | - | + | + | - |
| RluA-1      | 1.245E-07 | 0.8229066 | - | + | + | - |
| caup        | 0.0003323 | 0.8183087 | - | + | + | - |
| Ude         | 1.047E-05 | 0.8160931 | - | + | + | - |
| Adh         | 1.851E-06 | 0.8121782 | - | + | + | - |
| CG5326      | 2.403E-12 | 0.8096399 | - | + | + | - |
| CG9705      | 3.859E-15 | 0.7892203 | - | + | + | - |
| CG11686     | 7.832E-06 | 0.7785866 | - | + | + | - |
| dp          | 1.339E-16 | 0.7674886 | - | + | + | - |
| opa         | 0.0056448 | 0.7668649 | - | + | + | - |
| Cat         | 3.578E-19 | 0.7661664 | - | + | + | - |
| dl          | 2.582E-09 | 0.7563253 | - | + | + | - |
| Irc         | 4.515E-15 | 0.7513175 | - | + | + | - |
| Tdrd3       | 7.105E-06 | 0.7505402 | - | + | + | - |
| CG7139      | 1.941E-10 | 0.74799   | - | + | + | - |
| for         | 8.032E-11 | 0.7479647 | - | + | + | - |
| in          | 0.0203775 | 0.744439  | - | + | + | - |
| CG8306      | 8.379E-12 | 0.741502  | - | + | + | - |
| I(1)G0469   | 1.099E-07 | 0.7370894 | - | + | + | - |
| Uhg5        | 4.547E-12 | 0.7342015 | - | + | + | - |
| CG11073     | 8.044E-10 | 0.7333379 | - | + | + | - |
| CG32082     | 1.571E-13 | 0.7204372 | - | + | + | - |
| Exn         | 1.289E-09 | 0.7138623 | - | + | + | - |
| CG4928      | 4.074E-10 | 0.7112306 | - | + | + | - |
| CG2604      | 9.123E-13 | 0.7066824 | - | + | + | - |
| Keap1       | 1.468E-05 | 0.7032758 | - | + | + | - |
| Ugt86Da     | 7.039E-06 | 0.6987454 | - | + | + | - |
| InR         | 7.47E-12  | 0.6931608 | - | + | + | - |
| fw          | 5.08E-08  | 0.6910808 | - | + | + | - |

|           |           |           |   |   |   |   |
|-----------|-----------|-----------|---|---|---|---|
| CG4996    | 3.055E-05 | 0.6893097 | - | + | + | - |
| CG14207   | 3.787E-14 | 0.6872168 | - | + | + | - |
| Plod      | 6.677E-10 | 0.6833275 | - | + | + | - |
| b         | 1.409E-06 | 0.6804272 | - | + | + | - |
| jbug      | 6.145E-08 | 0.6690862 | - | + | + | - |
| CG4455    | 0.0051448 | 0.6614674 | - | + | + | - |
| tsh       | 0.001494  | 0.6527549 | - | + | + | - |
| Rac2      | 2.507E-06 | 0.6524446 | - | + | + | - |
| Hsc70-5   | 1.075E-11 | 0.6400902 | - | + | + | - |
| wit       | 3.846E-07 | 0.6382869 | - | + | + | - |
| Ant2      | 0.0356908 | 0.6301566 | - | + | + | - |
| CG14223   | 0.0011303 | 0.6274368 | - | + | + | - |
| CR43257   | 0.0220568 | 0.626195  | - | + | + | - |
| CG8128    | 7.258E-06 | 0.6228314 | - | + | + | - |
| CG4404    | 3.091E-08 | 0.6200191 | - | + | + | - |
| CG17754   | 1.46E-06  | 0.614028  | - | + | + | - |
| CG9795    | 4.738E-05 | 0.6075542 | - | + | + | - |
| CG7675    | 5.557E-11 | 0.6062252 | - | + | + | - |
| Nak       | 0.0001487 | 0.6041964 | - | + | + | - |
| Acox57D-p | 7.258E-06 | 0.6032624 | - | + | + | - |
| sra       | 2.859E-05 | 0.5953362 | - | + | + | - |
| Hsc70-3   | 4.276E-10 | 0.5924434 | - | + | + | - |
| PEK       | 2.88E-06  | 0.5912829 | - | + | + | - |
| cno       | 8.877E-08 | 0.5886729 | - | + | + | - |
| Ptp10D    | 1.012E-05 | 0.5799094 | - | + | + | - |
| CR43900   | 0.0343551 | 0.5785068 | - | + | + | - |
| Ald       | 1.257E-13 | 0.5769548 | - | + | + | - |
| ed        | 9.119E-06 | 0.5736184 | - | + | + | - |
| shg       | 0.0015671 | 0.5711902 | - | + | + | - |
| mnb       | 6.813E-06 | 0.5697004 | - | + | + | - |
| Samuel    | 0.0080166 | 0.5678974 | - | + | + | - |
| mura      | 1.302E-08 | 0.5658221 | - | + | + | - |
| osp       | 4.257E-05 | 0.5649408 | - | + | + | - |
| Nrt       | 9.796E-05 | 0.5633737 | - | + | + | - |
| modSP     | 1.619E-06 | 0.5631844 | - | + | + | - |
| CG11147   | 0.0002449 | 0.5592623 | - | + | + | - |
| mal       | 0.0188409 | 0.5560346 | - | + | + | - |
| Mipp1     | 3.191E-06 | 0.5557857 | - | + | + | - |
| fray      | 0.0033217 | 0.5557517 | - | + | + | - |
| CG42238   | 7.728E-07 | 0.5543571 | - | + | + | - |
| sba       | 8.306E-05 | 0.5529294 | - | + | + | - |
| koi       | 0.0002645 | 0.5496788 | - | + | + | - |
| Hr39      | 0.0012906 | 0.5445955 | - | + | + | - |
| Piezo     | 5.647E-05 | 0.5427962 | - | + | + | - |
| if        | 1.223E-06 | 0.542646  | - | + | + | - |
| CG34126   | 0.0016562 | 0.5397336 | - | + | + | - |
| CG33298   | 0.0007251 | 0.5380044 | - | + | + | - |
| Tsp42Ef   | 0.0001127 | 0.5364684 | - | + | + | - |
| fz2       | 9.203E-05 | 0.5361058 | - | + | + | - |
| ckn       | 0.0002006 | 0.5320132 | - | + | + | - |
| CG32676   | 4.706E-05 | 0.5224279 | - | + | + | - |
| mys       | 2.607E-05 | 0.5220167 | - | + | + | - |
| CG11655   | 0.0024283 | 0.5176053 | - | + | + | - |
| sprt      | 0.0017987 | 0.5172794 | - | + | + | - |
| msn       | 1.313E-06 | 0.5169251 | - | + | + | - |
| ex        | 0.0005749 | 0.5156776 | - | + | + | - |
| CG43736   | 1.737E-06 | 0.5143951 | - | + | + | - |
| yrt       | 0.0004395 | 0.5128683 | - | + | + | - |

|          |           |           |   |   |   |   |
|----------|-----------|-----------|---|---|---|---|
| gk       | 0.0010298 | 0.5101069 | - | + | + | - |
| CG42666  | 0.0209259 | 0.5086366 | - | + | + | - |
| wun      | 4.738E-05 | 0.5059959 | - | + | + | - |
| CG11737  | 0.0005139 | 0.5008492 | - | + | + | - |
| CG4374   | 0.0006785 | 0.5004855 | - | + | + | - |
| CG11284  | 0.0156394 | 0.4998879 | - | + | + | - |
| sdk      | 3.505E-05 | 0.4998774 | - | + | + | - |
| Uba2     | 0.000476  | 0.4997751 | - | + | + | - |
| Shc      | 0.0036331 | 0.4984085 | - | + | + | - |
| CG4538   | 5.824E-05 | 0.4980224 | - | + | + | - |
| CG4297   | 0.003361  | 0.4967544 | - | + | + | - |
| mdy      | 1.753E-05 | 0.4911343 | - | + | + | - |
| Eaat1    | 1.606E-06 | 0.4906966 | - | + | + | - |
| magu     | 0.01075   | 0.4895909 | - | + | + | - |
| Rab10    | 0.0017482 | 0.4888028 | - | + | + | - |
| CG9005   | 9.203E-05 | 0.4886054 | - | + | + | - |
| Mical    | 7.274E-05 | 0.4849189 | - | + | + | - |
| dnr1     | 0.0001105 | 0.4833135 | - | + | + | - |
| CG14441  | 0.0005046 | 0.4809023 | - | + | + | - |
| Smg6     | 4.04E-05  | 0.4778722 | - | + | + | - |
| CG43341  | 0.0044865 | 0.4743451 | - | + | + | - |
| Ntf-2    | 0.0003708 | 0.4712048 | - | + | + | - |
| olf186-F | 0.000508  | 0.4688443 | - | + | + | - |
| skd      | 0.0001577 | 0.4675407 | - | + | + | - |
| trbl     | 0.001504  | 0.465898  | - | + | + | - |
| Gprk2    | 5.209E-05 | 0.4642505 | - | + | + | - |
| Kat60    | 0.0016333 | 0.4631748 | - | + | + | - |
| fng      | 1.952E-05 | 0.4623251 | - | + | + | - |
| hoe1     | 3.8E-05   | 0.4622511 | - | + | + | - |
| Sec16    | 0.0130657 | 0.461385  | - | + | + | - |
| Adk3     | 0.0120007 | 0.4605739 | - | + | + | - |
| Dp1      | 0.0025337 | 0.4596623 | - | + | + | - |
| Ptp4E    | 8.821E-05 | 0.4582798 | - | + | + | - |
| Tep4     | 6.972E-07 | 0.4569915 | - | + | + | - |
| MED14    | 0.0021041 | 0.4554292 | - | + | + | - |
| CG3552   | 0.0241007 | 0.4537702 | - | + | + | - |
| CG1299   | 0.001274  | 0.4525208 | - | + | + | - |
| M6       | 0.0008249 | 0.4507138 | - | + | + | - |
| CG30069  | 0.0040637 | 0.4500206 | - | + | + | - |
| Wbp2     | 6.694E-06 | 0.4493808 | - | + | + | - |
| CG31869  | 0.0115319 | 0.4476886 | - | + | + | - |
| CG5002   | 0.0231813 | 0.446085  | - | + | + | - |
| CR44987  | 0.0014752 | 0.445606  | - | + | + | - |
| CG34383  | 3.395E-05 | 0.4443835 | - | + | + | - |
| Tsf3     | 0.004513  | 0.437176  | - | + | + | - |
| Jheh2    | 1.838E-05 | 0.436019  | - | + | + | - |
| CG6791   | 0.0144301 | 0.4358688 | - | + | + | - |
| rngo     | 0.0242684 | 0.4350527 | - | + | + | - |
| CG31523  | 0.0001268 | 0.4343054 | - | + | + | - |
| Eaf      | 0.0072899 | 0.4339682 | - | + | + | - |
| Ubqn     | 5.892E-05 | 0.4335246 | - | + | + | - |
| CG8740   | 0.0008117 | 0.4333806 | - | + | + | - |
| Hmt4-20  | 0.0031209 | 0.4328067 | - | + | + | - |
| Cip4     | 6.855E-05 | 0.4310866 | - | + | + | - |
| gukh     | 0.0141228 | 0.4307226 | - | + | + | - |
| Unr      | 9.088E-06 | 0.4273297 | - | + | + | - |
| CR44961  | 0.0473922 | 0.4254417 | - | + | + | - |
| Cyp4d2   | 0.0002476 | 0.4242929 | - | + | + | - |



|           |           |           |   |   |   |   |
|-----------|-----------|-----------|---|---|---|---|
| Df31      | 0.0040933 | 0.4208842 | - | + | + | - |
| Egfr      | 0.0002349 | 0.4192998 | - | + | + | - |
| oc        | 0.0025589 | 0.418064  | - | + | + | - |
| Pdk1      | 0.0001156 | 0.4170662 | - | + | + | - |
| CG11873   | 0.0053774 | 0.4166441 | - | + | + | - |
| cact      | 5.317E-05 | 0.4157714 | - | + | + | - |
| CG2469    | 1.986E-05 | 0.4147823 | - | + | + | - |
| Cad87A    | 0.0092355 | 0.4135454 | - | + | + | - |
| CG12262   | 2.206E-05 | 0.4131324 | - | + | + | - |
| Zasp52    | 0.0045784 | 0.412787  | - | + | + | - |
| CG15093   | 0.0039379 | 0.4098144 | - | + | + | - |
| Su(Tpl)   | 2.065E-05 | 0.4096957 | - | + | + | - |
| mbc       | 0.0075458 | 0.4096805 | - | + | + | - |
| drpr      | 0.0051566 | 0.4067672 | - | + | + | - |
| Ctr1A     | 0.0061074 | 0.401328  | - | + | + | - |
| CG4022    | 0.0448201 | 0.4007161 | - | + | + | - |
| Gp93      | 0.0020931 | 0.4006387 | - | + | + | - |
| CG10527   | 0.0001403 | 0.3989528 | - | + | + | - |
| CG9008    | 0.0104263 | 0.3984762 | - | + | + | - |
| CG14132   | 0.0009844 | 0.3983986 | - | + | + | - |
| CG3036    | 2.972E-05 | 0.3967624 | - | + | + | - |
| Atg1      | 0.0183153 | 0.3966232 | - | + | + | - |
| CG42674   | 0.0014733 | 0.3958351 | - | + | + | - |
| Pmp70     | 0.0006932 | 0.3934101 | - | + | + | - |
| l(3)73Ah  | 0.0117112 | 0.3930298 | - | + | + | - |
| rdgA      | 0.0003019 | 0.3924688 | - | + | + | - |
| Karybeta3 | 0.0001567 | 0.3911129 | - | + | + | - |
| mthl1     | 0.0329454 | 0.3898251 | - | + | + | - |
| SF2       | 0.0003219 | 0.3877224 | - | + | + | - |
| Fur1      | 0.0028202 | 0.3859217 | - | + | + | - |
| Pvr       | 0.00659   | 0.3855978 | - | + | + | - |
| CG15083   | 0.0131398 | 0.3848805 | - | + | + | - |
| CG33056   | 0.001136  | 0.3842157 | - | + | + | - |
| pdgy      | 9.203E-05 | 0.3835886 | - | + | + | - |
| Dscam1    | 0.0022198 | 0.3833331 | - | + | + | - |
| Sxl       | 0.0002851 | 0.3805278 | - | + | + | - |
| CG11883   | 0.0185765 | 0.3803713 | - | + | + | - |
| Zw        | 0.0069858 | 0.3794308 | - | + | + | - |
| CG4452    | 0.0145945 | 0.3754543 | - | + | + | - |
| luna      | 0.0284211 | 0.3743154 | - | + | + | - |
| Pih1D1    | 0.001373  | 0.3723038 | - | + | + | - |
| CG14995   | 0.0464527 | 0.3712098 | - | + | + | - |
| Adar      | 0.0007793 | 0.3705458 | - | + | + | - |
| AdSS      | 0.0004035 | 0.3697445 | - | + | + | - |
| step      | 0.0227925 | 0.3656496 | - | + | + | - |
| ATP7      | 0.0287819 | 0.3633549 | - | + | + | - |
| Top3beta  | 0.0336099 | 0.3593776 | - | + | + | - |
| tai       | 0.0038458 | 0.3578428 | - | + | + | - |
| RhoGAP71E | 0.0101838 | 0.3570789 | - | + | + | - |
| CG42389   | 0.0074149 | 0.3539747 | - | + | + | - |
| CG8229    | 0.0107626 | 0.3527221 | - | + | + | - |
| Efa6      | 0.0146164 | 0.348348  | - | + | + | - |
| CG17111   | 0.0011293 | 0.3483286 | - | + | + | - |
| CG18659   | 0.0181231 | 0.3465942 | - | + | + | - |
| aos       | 0.019858  | 0.3449385 | - | + | + | - |
| CG42327   | 0.0129434 | 0.3444921 | - | + | + | - |
| Tfb1      | 0.0451081 | 0.3422246 | - | + | + | - |
| ctrip     | 0.0473114 | 0.3406872 | - | + | + | - |

|             |           |           |   |   |   |   |
|-------------|-----------|-----------|---|---|---|---|
| SP1173      | 0.0246141 | 0.3396982 | - | + | + | - |
| G9a         | 0.0284243 | 0.339654  | - | + | + | - |
| CG12814     | 0.0315971 | 0.3386827 | - | + | + | - |
| CG2186      | 0.0087301 | 0.3385836 | - | + | + | - |
| Mhcl        | 0.0151955 | 0.3379993 | - | + | + | - |
| Ac76E       | 0.0447842 | 0.3355584 | - | + | + | - |
| CG8929      | 0.0250018 | 0.335098  | - | + | + | - |
| CG30122     | 0.0009184 | 0.3350818 | - | + | + | - |
| crb         | 0.0137464 | 0.3333743 | - | + | + | - |
| CG8036      | 0.0006367 | 0.3333596 | - | + | + | - |
| Jra         | 0.0182879 | 0.3311418 | - | + | + | - |
| Hsf         | 0.0073962 | 0.3267705 | - | + | + | - |
| Hr78        | 0.0133798 | 0.3260839 | - | + | + | - |
| Rip11       | 0.0057738 | 0.3257971 | - | + | + | - |
| atl         | 0.0029513 | 0.3245508 | - | + | + | - |
| CG34408     | 0.0182837 | 0.3243915 | - | + | + | - |
| EDTP        | 0.0076934 | 0.3226624 | - | + | + | - |
| Cnx99A      | 0.0026257 | 0.3198436 | - | + | + | - |
| CG5674      | 0.020951  | 0.3194991 | - | + | + | - |
| Kul         | 0.0173402 | 0.3181252 | - | + | + | - |
| NT5E-2      | 0.0243281 | 0.3173268 | - | + | + | - |
| CG31635     | 0.0150149 | 0.3149449 | - | + | + | - |
| CG10413     | 0.0228834 | 0.3137972 | - | + | + | - |
| ftz-f1      | 0.0069507 | 0.3137656 | - | + | + | - |
| GlcT-1      | 0.0179434 | 0.3114423 | - | + | + | - |
| put         | 0.0321457 | 0.309728  | - | + | + | - |
| Gmap        | 0.0228509 | 0.3080185 | - | + | + | - |
| Meltrin     | 0.0299397 | 0.3074113 | - | + | + | - |
| Cir1        | 0.0109797 | 0.3012602 | - | + | + | - |
| Mi-2        | 0.024575  | 0.2996105 | - | + | + | - |
| Stat92E     | 0.0023591 | 0.2978677 | - | + | + | - |
| Hmu         | 0.0330124 | 0.2972497 | - | + | + | - |
| CG31808     | 0.0171898 | 0.2970161 | - | + | + | - |
| DIP1        | 0.0325744 | 0.2964103 | - | + | + | - |
| Vav         | 0.0273106 | 0.2943913 | - | + | + | - |
| rdx         | 0.0248813 | 0.2941334 | - | + | + | - |
| ens         | 0.0234177 | 0.2932286 | - | + | + | - |
| pr          | 0.0223375 | 0.2911234 | - | + | + | - |
| Eip75B      | 0.046874  | 0.2904037 | - | + | + | - |
| CG42542     | 0.0230092 | 0.2895571 | - | + | + | - |
| elav        | 0.0093667 | 0.2885592 | - | + | + | - |
| CG10082     | 0.0021936 | 0.2880516 | - | + | + | - |
| Kr-h2       | 0.0335569 | 0.2879505 | - | + | + | - |
| Trx-2       | 0.0250891 | 0.2875986 | - | + | + | - |
| SkpA        | 0.0232438 | 0.2873464 | - | + | + | - |
| RhoGEF2     | 0.0103318 | 0.287069  | - | + | + | - |
| Pde8        | 0.0260883 | 0.2866307 | - | + | + | - |
| CG3168      | 0.0178218 | 0.2860125 | - | + | + | - |
| CG14438     | 0.0201502 | 0.2818079 | - | + | + | - |
| BtbVII      | 0.0092316 | 0.2808659 | - | + | + | - |
| Rbp1-like   | 0.0062521 | 0.2769478 | - | + | + | - |
| santa-maria | 0.0111271 | 0.2725392 | - | + | + | - |
| inaE        | 0.0468789 | 0.268687  | - | + | + | - |
| Trf2        | 0.0365487 | 0.2655432 | - | + | + | - |
| Tsp74F      | 0.034017  | 0.2649102 | - | + | + | - |
| Prosap      | 0.0152221 | 0.2601801 | - | + | + | - |
| SNF4Agamma  | 0.0210231 | 0.2600521 | - | + | + | - |
| Got2        | 0.021016  | 0.2549364 | - | + | + | - |

|               |           |           |   |   |   |   |
|---------------|-----------|-----------|---|---|---|---|
| AnxB11        | 0.0454723 | 0.2541368 | - | + | + | - |
| ine           | 0.0287819 | 0.2519909 | - | + | + | - |
| Cp1           | 0.0045575 | 0.2488228 | - | + | + | - |
| Men           | 0.0169475 | 0.2486861 | - | + | + | - |
| Dek           | 0.0400732 | 0.2455529 | - | + | + | - |
| Xe7           | 0.0427523 | 0.2326145 | - | + | + | - |
| Bsg           | 0.0159937 | 0.2324672 | - | + | + | - |
| lolal         | 0.0472853 | 0.2286844 | - | + | + | - |
| CG16953       | 0.0496454 | 0.2063358 | - | + | + | - |
| alphagamma-el | 0         | 5.5928615 | - | + | - | - |
| Hsp27         | 0         | 5.0253504 | - | + | - | - |
| Hsp68         | 0         | 4.8393569 | - | + | - | - |
| Hsp26         | 0         | 4.6307071 | - | + | - | - |
| CG5290        | 1.4E-171  | 3.5131249 | - | + | - | - |
| Hsp70Ba       | 1.084E-33 | 3.3897953 | - | + | - | - |
| CR42765       | 5.386E-29 | 2.7200533 | - | + | - | - |
| Pa1           | 4.23E-83  | 2.2451208 | - | + | - | - |
| CR43465       | 4.07E-11  | 2.0835189 | - | + | - | - |
| verm          | 1.199E-47 | 1.9414917 | - | + | - | - |
| Faa           | 1.338E-64 | 1.8731707 | - | + | - | - |
| CG12643       | 1.15E-21  | 1.8604524 | - | + | - | - |
| Cpr97Ea       | 8.283E-57 | 1.8122014 | - | + | - | - |
| Cyp4e3        | 1.155E-46 | 1.6620536 | - | + | - | - |
| CG8483        | 9.434E-22 | 1.6015253 | - | + | - | - |
| CG14186       | 2.206E-55 | 1.5966348 | - | + | - | - |
| CG16885       | 9.648E-75 | 1.5770275 | - | + | - | - |
| Mrp4          | 3.917E-54 | 1.569465  | - | + | - | - |
| CG11700       | 6.59E-07  | 1.5458309 | - | + | - | - |
| GstE8         | 6.196E-12 | 1.4866883 | - | + | - | - |
| Cht7          | 6.054E-27 | 1.4634153 | - | + | - | - |
| serp          | 4.843E-59 | 1.4590785 | - | + | - | - |
| CecB          | 2.222E-05 | 1.4476136 | - | + | - | - |
| GstE10        | 2.709E-08 | 1.3982027 | - | + | - | - |
| GstE7         | 1.921E-20 | 1.3584838 | - | + | - | - |
| GstE3         | 4.785E-37 | 1.3511733 | - | + | - | - |
| CG2065        | 1.084E-33 | 1.3431674 | - | + | - | - |
| ref(2)P       | 1.003E-58 | 1.3393737 | - | + | - | - |
| CG12290       | 1.614E-31 | 1.3073736 | - | + | - | - |
| CG2650        | 5.637E-39 | 1.2711035 | - | + | - | - |
| CG12224       | 3.819E-23 | 1.2616691 | - | + | - | - |
| Cctgamma      | 4.096E-24 | 1.2560014 | - | + | - | - |
| GstE5         | 1.916E-11 | 1.2362135 | - | + | - | - |
| dlt           | 1.619E-06 | 1.2354436 | - | + | - | - |
| Gasp          | 9.429E-28 | 1.1860175 | - | + | - | - |
| GstE1         | 1.458E-25 | 1.1776774 | - | + | - | - |
| CG16959       | 7.046E-10 | 1.1727819 | - | + | - | - |
| CR43481       | 7.825E-13 | 1.1719157 | - | + | - | - |
| bnl           | 1.035E-12 | 1.1644436 | - | + | - | - |
| CG11453       | 1.599E-13 | 1.1623828 | - | + | - | - |
| ds            | 5.705E-13 | 1.1372773 | - | + | - | - |
| CR44769       | 0.0001413 | 1.1342809 | - | + | - | - |
| mtg           | 3.485E-13 | 1.0980119 | - | + | - | - |
| Clk           | 5.011E-22 | 1.0927158 | - | + | - | - |
| Taf7          | 1.927E-08 | 1.0844412 | - | + | - | - |
| CR43838       | 0.0002299 | 1.0677175 | - | + | - | - |
| CG6675        | 2.799E-09 | 1.0673209 | - | + | - | - |
| ade2          | 1.317E-28 | 1.0653249 | - | + | - | - |
| CG10936       | 1.542E-12 | 1.0646238 | - | + | - | - |

|          |           |           |   |   |   |   |
|----------|-----------|-----------|---|---|---|---|
| CG9850   | 7.105E-16 | 1.0538095 | - | + | - | - |
| spz5     | 1.824E-10 | 1.0242657 | - | + | - | - |
| laccase2 | 3.522E-13 | 1.0170436 | - | + | - | - |
| CG12985  | 2.883E-05 | 1.0103231 | - | + | - | - |
| CG6739   | 1.676E-14 | 1.0043856 | - | + | - | - |
| CG30438  | 1.263E-11 | 0.9814959 | - | + | - | - |
| CR45018  | 4.41E-05  | 0.9787725 | - | + | - | - |
| sas      | 4.219E-18 | 0.9614223 | - | + | - | - |
| comm2    | 1.594E-13 | 0.9605781 | - | + | - | - |
| obst-B   | 1.157E-10 | 0.9556665 | - | + | - | - |
| CG17834  | 2.097E-11 | 0.9356763 | - | + | - | - |
| CG40006  | 1.8E-19   | 0.9271956 | - | + | - | - |
| CG14892  | 1.547E-21 | 0.9252123 | - | + | - | - |
| mthl9    | 0.0047485 | 0.9244752 | - | + | - | - |
| knk      | 2.128E-07 | 0.9240843 | - | + | - | - |
| mfas     | 5.099E-27 | 0.9226872 | - | + | - | - |
| CG30427  | 3.981E-15 | 0.9214581 | - | + | - | - |
| CG15544  | 9.627E-11 | 0.9139956 | - | + | - | - |
| lush     | 0.0001456 | 0.9119765 | - | + | - | - |
| CG15021  | 2.367E-08 | 0.911581  | - | + | - | - |
| CR32636  | 0.0076432 | 0.9079393 | - | + | - | - |
| AOX1     | 1.386E-16 | 0.9066481 | - | + | - | - |
| CG9095   | 0.004041  | 0.9059822 | - | + | - | - |
| CR44108  | 0.0001653 | 0.8959079 | - | + | - | - |
| CG34137  | 0.0064917 | 0.8932339 | - | + | - | - |
| Obp83g   | 0.0001161 | 0.8927817 | - | + | - | - |
| CG42240  | 2.266E-13 | 0.8925185 | - | + | - | - |
| Cyp301a1 | 0.0083446 | 0.8917789 | - | + | - | - |
| CG10026  | 4.987E-10 | 0.8843974 | - | + | - | - |
| Cdc37    | 1.813E-15 | 0.8832901 | - | + | - | - |
| Cyp6a21  | 8.916E-08 | 0.8799998 | - | + | - | - |
| CG32816  | 1.416E-05 | 0.8783899 | - | + | - | - |
| CG10737  | 3.175E-14 | 0.8556403 | - | + | - | - |
| rols     | 1.082E-07 | 0.848987  | - | + | - | - |
| CG15879  | 9.738E-07 | 0.8473892 | - | + | - | - |
| CAHbeta  | 7.592E-08 | 0.8450072 | - | + | - | - |
| CG5509   | 0.0103318 | 0.8430245 | - | + | - | - |
| CG4982   | 0.0257582 | 0.8429829 | - | + | - | - |
| CG34347  | 7.578E-08 | 0.8363936 | - | + | - | - |
| CG4733   | 5.412E-10 | 0.8261195 | - | + | - | - |
| CG6908   | 4.806E-18 | 0.8260895 | - | + | - | - |
| CR44321  | 0.0001586 | 0.8229063 | - | + | - | - |
| CG15506  | 1.159E-06 | 0.8221923 | - | + | - | - |
| sv       | 5.484E-12 | 0.8210823 | - | + | - | - |
| mol      | 7.592E-08 | 0.8207019 | - | + | - | - |
| CG10237  | 2.587E-15 | 0.8120552 | - | + | - | - |
| tnc      | 1.619E-06 | 0.8090915 | - | + | - | - |
| CG13116  | 5.379E-11 | 0.8023001 | - | + | - | - |
| CG17919  | 2.088E-15 | 0.8012881 | - | + | - | - |
| CG32170  | 7.03E-05  | 0.798325  | - | + | - | - |
| CG1673   | 2.181E-10 | 0.7923418 | - | + | - | - |
| CG10345  | 2.373E-20 | 0.7919249 | - | + | - | - |
| Cad86C   | 1.606E-05 | 0.7911811 | - | + | - | - |
| CR43452  | 0.0002911 | 0.7910683 | - | + | - | - |
| Nplp3    | 1.264E-24 | 0.7902551 | - | + | - | - |
| haf      | 6.562E-06 | 0.7894126 | - | + | - | - |
| GstE6    | 3.695E-10 | 0.789296  | - | + | - | - |
| Mtap     | 1.092E-06 | 0.7857927 | - | + | - | - |

|            |           |           |   |   |   |   |
|------------|-----------|-----------|---|---|---|---|
| CG14879    | 0.0211635 | 0.7832064 | - | + | - | - |
| CG30440    | 6.444E-05 | 0.7817463 | - | + | - | - |
| CG15695    | 0.0024545 | 0.7796991 | - | + | - | - |
| CG7778     | 4.806E-18 | 0.7754118 | - | + | - | - |
| pot        | 2.974E-09 | 0.7723883 | - | + | - | - |
| ple        | 6.173E-12 | 0.771165  | - | + | - | - |
| Cyp6a2     | 0.0047447 | 0.7696916 | - | + | - | - |
| how        | 4.247E-10 | 0.7689678 | - | + | - | - |
| bnb        | 1.216E-11 | 0.764796  | - | + | - | - |
| AnxB9      | 6.677E-18 | 0.7642017 | - | + | - | - |
| CG7079     | 1.021E-13 | 0.7564588 | - | + | - | - |
| CG34010    | 0.0480098 | 0.7459189 | - | + | - | - |
| ci         | 1.379E-05 | 0.7424252 | - | + | - | - |
| bru-2      | 2.034E-06 | 0.7423179 | - | + | - | - |
| CG2781     | 3.821E-17 | 0.7364618 | - | + | - | - |
| CG9701     | 1.258E-12 | 0.7340687 | - | + | - | - |
| r-cup      | 0.0409064 | 0.7336965 | - | + | - | - |
| lab        | 0.0001668 | 0.7329577 | - | + | - | - |
| Myo10A     | 3.362E-05 | 0.7310936 | - | + | - | - |
| CG34398    | 7.759E-07 | 0.7297255 | - | + | - | - |
| CG4267     | 2.204E-05 | 0.7290675 | - | + | - | - |
| CG42808    | 2.109E-05 | 0.7287408 | - | + | - | - |
| CG13055    | 0.006723  | 0.7254071 | - | + | - | - |
| plum       | 4.536E-06 | 0.7252248 | - | + | - | - |
| CG15546    | 2.616E-05 | 0.7209164 | - | + | - | - |
| yin        | 5.557E-11 | 0.716081  | - | + | - | - |
| GstO3      | 3.074E-07 | 0.7131412 | - | + | - | - |
| Osi24      | 0.0046276 | 0.7075549 | - | + | - | - |
| CG7900     | 0.0113808 | 0.7050043 | - | + | - | - |
| Skeletor   | 7.697E-07 | 0.7033575 | - | + | - | - |
| Cyp6a23    | 8.962E-07 | 0.6956725 | - | + | - | - |
| Fmo-2      | 5.287E-10 | 0.6934381 | - | + | - | - |
| CG5191     | 8.178E-08 | 0.6931521 | - | + | - | - |
| alpha-Est1 | 2.875E-10 | 0.6917654 | - | + | - | - |
| CG5381     | 1.967E-05 | 0.691517  | - | + | - | - |
| CG34120    | 3.249E-13 | 0.6895306 | - | + | - | - |
| trol       | 1.526E-16 | 0.6871058 | - | + | - | - |
| CG2816     | 0.0456069 | 0.6856384 | - | + | - | - |
| vn         | 0.0004328 | 0.6766202 | - | + | - | - |
| CG15365    | 0.0002163 | 0.6764484 | - | + | - | - |
| yellow-c   | 1.972E-13 | 0.6752654 | - | + | - | - |
| CG31207    | 9.35E-12  | 0.6707971 | - | + | - | - |
| CG5921     | 0.0002681 | 0.6707576 | - | + | - | - |
| CG5835     | 1.348E-09 | 0.6648609 | - | + | - | - |
| qsm        | 4.734E-11 | 0.6628839 | - | + | - | - |
| drm        | 0.0029931 | 0.662144  | - | + | - | - |
| ldh        | 1.444E-14 | 0.660498  | - | + | - | - |
| CG9186     | 3.435E-09 | 0.6534534 | - | + | - | - |
| CG3655     | 4.344E-07 | 0.6518977 | - | + | - | - |
| insc       | 0.0013264 | 0.6493008 | - | + | - | - |
| CG33970    | 1.68E-12  | 0.6492287 | - | + | - | - |
| CG42272    | 0.0109278 | 0.6490793 | - | + | - | - |
| kermit     | 0.0267936 | 0.6415413 | - | + | - | - |
| CG31522    | 3.719E-10 | 0.641026  | - | + | - | - |
| Tollo      | 0.0019992 | 0.6400584 | - | + | - | - |
| CG30460    | 6.681E-05 | 0.6398759 | - | + | - | - |
| hdly       | 2.014E-11 | 0.6379159 | - | + | - | - |
| CG14694    | 8.787E-05 | 0.637685  | - | + | - | - |

|           |           |           |   |   |   |   |
|-----------|-----------|-----------|---|---|---|---|
| Droj2     | 3.488E-10 | 0.6308438 | - | + | - | - |
| CG30284   | 0.0156213 | 0.6295461 | - | + | - | - |
| CG12535   | 0.003832  | 0.6287417 | - | + | - | - |
| CG4000    | 5.336E-11 | 0.6285094 | - | + | - | - |
| Phk-3     | 7.021E-05 | 0.6267343 | - | + | - | - |
| CG9527    | 1.837E-05 | 0.6249093 | - | + | - | - |
| Sulf1     | 3.776E-09 | 0.6241955 | - | + | - | - |
| CG6175    | 0.0014446 | 0.6221244 | - | + | - | - |
| CG3842    | 1.062E-09 | 0.6199013 | - | + | - | - |
| CG16772   | 7.885E-10 | 0.6197183 | - | + | - | - |
| mth       | 0.0003868 | 0.6137387 | - | + | - | - |
| dgo       | 0.0103318 | 0.6132597 | - | + | - | - |
| CG42748   | 2.698E-10 | 0.6099793 | - | + | - | - |
| Ect4      | 3.204E-06 | 0.6093222 | - | + | - | - |
| CR43253   | 0.0110046 | 0.608221  | - | + | - | - |
| RhoGAP15B | 0.0012036 | 0.6060581 | - | + | - | - |
| CG8303    | 0.0159321 | 0.6054081 | - | + | - | - |
| CG31809   | 0.000268  | 0.6032121 | - | + | - | - |
| CG33275   | 3.154E-05 | 0.6009215 | - | + | - | - |
| spir      | 3.55E-07  | 0.6009198 | - | + | - | - |
| out       | 6.601E-07 | 0.5992142 | - | + | - | - |
| CG43394   | 4.2E-05   | 0.5967208 | - | + | - | - |
| CG17778   | 4.299E-06 | 0.5946642 | - | + | - | - |
| CG43935   | 0.0031706 | 0.5945218 | - | + | - | - |
| CG43693   | 4.502E-07 | 0.5944055 | - | + | - | - |
| CG17027   | 0.0003377 | 0.5916549 | - | + | - | - |
| CG34325   | 2.813E-05 | 0.5860245 | - | + | - | - |
| PGRP-LC   | 2.25E-08  | 0.582703  | - | + | - | - |
| slp2      | 0.0207613 | 0.5821416 | - | + | - | - |
| fog       | 0.0001175 | 0.5769196 | - | + | - | - |
| be        | 0.0006098 | 0.5741767 | - | + | - | - |
| Tie       | 6.313E-07 | 0.5740678 | - | + | - | - |
| CG10176   | 0.0002255 | 0.5735205 | - | + | - | - |
| Cad96Ca   | 2.228E-05 | 0.5721527 | - | + | - | - |
| CG44245   | 1.8E-07   | 0.5714285 | - | + | - | - |
| aay       | 5.08E-08  | 0.5707895 | - | + | - | - |
| Cpr49Ae   | 1.701E-09 | 0.5695502 | - | + | - | - |
| Spn28Dc   | 6.216E-07 | 0.5684292 | - | + | - | - |
| ptr       | 0.0001078 | 0.5682956 | - | + | - | - |
| CG2254    | 1.145E-12 | 0.5674568 | - | + | - | - |
| fj        | 0.0118203 | 0.5654112 | - | + | - | - |
| Pvf1      | 0.0001108 | 0.5618899 | - | + | - | - |
| CG31176   | 0.0133131 | 0.5613816 | - | + | - | - |
| CG14696   | 0.0095325 | 0.5579837 | - | + | - | - |
| Shroom    | 4.947E-06 | 0.5552596 | - | + | - | - |
| CR43459   | 0.0378271 | 0.5528282 | - | + | - | - |
| SKIP      | 0.0193687 | 0.549375  | - | + | - | - |
| CG1774    | 0.011487  | 0.5480201 | - | + | - | - |
| CG30456   | 0.0015636 | 0.5460598 | - | + | - | - |
| CG9839    | 0.0014564 | 0.5441365 | - | + | - | - |
| Rgl       | 2.499E-05 | 0.5404627 | - | + | - | - |
| CG34417   | 5.66E-08  | 0.5396082 | - | + | - | - |
| AdamTS-A  | 0.018961  | 0.5371941 | - | + | - | - |
| mab-21    | 0.0013413 | 0.5367397 | - | + | - | - |
| lz        | 0.001523  | 0.5366465 | - | + | - | - |
| disco-r   | 0.0004655 | 0.5362016 | - | + | - | - |
| Ten-m     | 3.614E-06 | 0.5360491 | - | + | - | - |
| CG1927    | 7.582E-07 | 0.5340236 | - | + | - | - |

|           |           |           |   |   |   |   |
|-----------|-----------|-----------|---|---|---|---|
| CG16700   | 0.0001839 | 0.5305821 | - | + | - | - |
| CG43163   | 0.0161519 | 0.5291225 | - | + | - | - |
| hgo       | 4.402E-08 | 0.5289256 | - | + | - | - |
| CG13366   | 0.0004748 | 0.5289131 | - | + | - | - |
| CG11951   | 0.0002973 | 0.5279105 | - | + | - | - |
| lrk1      | 0.0041423 | 0.5264047 | - | + | - | - |
| Ance      | 0.0003066 | 0.5220812 | - | + | - | - |
| Dys       | 9.818E-06 | 0.5201036 | - | + | - | - |
| NijA      | 0.0003005 | 0.5194875 | - | + | - | - |
| Cht2      | 0.0001571 | 0.5184685 | - | + | - | - |
| msi       | 3.997E-07 | 0.5180119 | - | + | - | - |
| CG7970    | 0.0011274 | 0.5176979 | - | + | - | - |
| Btk29A    | 0.0071342 | 0.516955  | - | + | - | - |
| Thd1      | 0.0007296 | 0.5153564 | - | + | - | - |
| Fs        | 0.0001487 | 0.5151192 | - | + | - | - |
| CG10562   | 0.0022198 | 0.5147479 | - | + | - | - |
| GstZ2     | 7.374E-05 | 0.5104062 | - | + | - | - |
| CG34371   | 0.0005471 | 0.5098835 | - | + | - | - |
| 5-HT2A    | 2.499E-05 | 0.5098718 | - | + | - | - |
| CG13101   | 0.0007217 | 0.5090778 | - | + | - | - |
| Fas3      | 8.117E-07 | 0.5090153 | - | + | - | - |
| RhoGEF64C | 3.811E-05 | 0.5082591 | - | + | - | - |
| e         | 0.000159  | 0.5071865 | - | + | - | - |
| CG3328    | 0.002006  | 0.5062039 | - | + | - | - |
| CG9920    | 0.0055458 | 0.5043537 | - | + | - | - |
| LRP1      | 2.023E-05 | 0.5037887 | - | + | - | - |
| dib       | 0.0040599 | 0.5034958 | - | + | - | - |
| CLIP-190  | 2.581E-06 | 0.5019507 | - | + | - | - |
| sog       | 0.0003635 | 0.5008039 | - | + | - | - |
| Nha2      | 0.0007189 | 0.4974974 | - | + | - | - |
| ZnT41F    | 0.0015394 | 0.4861877 | - | + | - | - |
| Cyp6a9    | 0.0003913 | 0.4813822 | - | + | - | - |
| CG7497    | 0.0062521 | 0.4811295 | - | + | - | - |
| cnn       | 7.739E-06 | 0.4805082 | - | + | - | - |
| MESR3     | 0.0062521 | 0.4796747 | - | + | - | - |
| MESR6     | 0.0084089 | 0.4794829 | - | + | - | - |
| CG6701    | 0.0015998 | 0.4775821 | - | + | - | - |
| CG9733    | 0.0118861 | 0.4772688 | - | + | - | - |
| CG8086    | 5.24E-06  | 0.4748265 | - | + | - | - |
| Rcd2      | 0.0349117 | 0.4738251 | - | + | - | - |
| Mst85C    | 0.005813  | 0.4726815 | - | + | - | - |
| Act57B    | 0.0001373 | 0.4723659 | - | + | - | - |
| toy       | 0.0011027 | 0.4705037 | - | + | - | - |
| CG5945    | 8.361E-05 | 0.4703405 | - | + | - | - |
| Mvl       | 0.0033625 | 0.4689976 | - | + | - | - |
| CR44107   | 0.0030268 | 0.4663297 | - | + | - | - |
| Ac13E     | 2.972E-05 | 0.4649026 | - | + | - | - |
| nrm       | 2.357E-05 | 0.4638584 | - | + | - | - |
| CG13024   | 0.003832  | 0.4633966 | - | + | - | - |
| Tg        | 0.0025337 | 0.4618901 | - | + | - | - |
| GstO2     | 0.002535  | 0.4615879 | - | + | - | - |
| CG14830   | 0.0001329 | 0.4615414 | - | + | - | - |
| cana      | 0.040752  | 0.4612876 | - | + | - | - |
| Ddr       | 0.0496087 | 0.4610161 | - | + | - | - |
| cv-c      | 3.072E-05 | 0.459328  | - | + | - | - |
| slif      | 0.0109726 | 0.458305  | - | + | - | - |
| Nep2      | 0.0058258 | 0.4582911 | - | + | - | - |
| Pgd       | 0.0001325 | 0.4564212 | - | + | - | - |

|           |           |           |   |   |   |   |
|-----------|-----------|-----------|---|---|---|---|
| CG3301    | 4.571E-06 | 0.4559595 | - | + | - | - |
| Pur-alpha | 2.721E-05 | 0.4547085 | - | + | - | - |
| CG2930    | 0.0015831 | 0.4521299 | - | + | - | - |
| CG7668    | 0.0044981 | 0.4520458 | - | + | - | - |
| Tsp       | 2.76E-06  | 0.451901  | - | + | - | - |
| Trpm      | 0.0002802 | 0.4497341 | - | + | - | - |
| Prm       | 0.0280896 | 0.4468614 | - | + | - | - |
| CG11407   | 1.245E-06 | 0.4466752 | - | + | - | - |
| NKAIN     | 0.0001057 | 0.446182  | - | + | - | - |
| CG4991    | 0.0011875 | 0.4459171 | - | + | - | - |
| CHKov2    | 0.0020397 | 0.4429944 | - | + | - | - |
| CG1640    | 6.689E-06 | 0.4402522 | - | + | - | - |
| ps        | 1.72E-06  | 0.4348859 | - | + | - | - |
| gl        | 0.0014915 | 0.4338231 | - | + | - | - |
| l(1)G0289 | 0.0001801 | 0.4313631 | - | + | - | - |
| CG10462   | 0.0043075 | 0.4281103 | - | + | - | - |
| CG32407   | 0.0030059 | 0.4276557 | - | + | - | - |
| CG1806    | 0.0119252 | 0.4241041 | - | + | - | - |
| toe       | 0.0442117 | 0.424032  | - | + | - | - |
| plx       | 0.0025982 | 0.4219732 | - | + | - | - |
| CG13895   | 0.0005307 | 0.4207779 | - | + | - | - |
| mim       | 0.0002147 | 0.4191308 | - | + | - | - |
| Atf3      | 0.0018041 | 0.4186316 | - | + | - | - |
| CG5541    | 0.0219816 | 0.418602  | - | + | - | - |
| CR45102   | 0.0215529 | 0.4172679 | - | + | - | - |
| comm3     | 0.0289323 | 0.4161241 | - | + | - | - |
| CG14439   | 6.269E-05 | 0.4153909 | - | + | - | - |
| r2d2      | 0.0142575 | 0.4089042 | - | + | - | - |
| SLC5A11   | 0.0016333 | 0.4084176 | - | + | - | - |
| CG3829    | 0.0003491 | 0.4076016 | - | + | - | - |
| app       | 2.607E-05 | 0.405568  | - | + | - | - |
| Dfd       | 0.0249007 | 0.4049162 | - | + | - | - |
| GLaz      | 9.209E-05 | 0.404467  | - | + | - | - |
| blot      | 0.0031243 | 0.4040957 | - | + | - | - |
| CG5909    | 0.0297268 | 0.40341   | - | + | - | - |
| Jheh1     | 0.0007093 | 0.402776  | - | + | - | - |
| Cdk4      | 0.0329536 | 0.4017297 | - | + | - | - |
| CG1648    | 3.849E-06 | 0.4004259 | - | + | - | - |
| CanB2     | 0.0002443 | 0.4000916 | - | + | - | - |
| yuri      | 0.0119372 | 0.4000121 | - | + | - | - |
| ITP       | 0.0008664 | 0.3985354 | - | + | - | - |
| CG42671   | 0.0001253 | 0.3981851 | - | + | - | - |
| CrebA     | 0.0359706 | 0.3978726 | - | + | - | - |
| Src42A    | 0.0149663 | 0.395986  | - | + | - | - |
| LanB2     | 0.0387998 | 0.3958905 | - | + | - | - |
| mwh       | 0.0137922 | 0.3958436 | - | + | - | - |
| dsd       | 0.0175257 | 0.3952503 | - | + | - | - |
| CAP       | 9.86E-05  | 0.3948931 | - | + | - | - |
| atilla    | 0.0006167 | 0.3932919 | - | + | - | - |
| CG1888    | 0.0086544 | 0.3922634 | - | + | - | - |
| CG15279   | 0.0032314 | 0.3908165 | - | + | - | - |
| Cyp305a1  | 0.0016284 | 0.3907098 | - | + | - | - |
| Pgi       | 2.691E-05 | 0.3851836 | - | + | - | - |
| CG18769   | 0.0014876 | 0.3850103 | - | + | - | - |
| Blimp-1   | 0.0066697 | 0.3790249 | - | + | - | - |
| CG2182    | 0.0016071 | 0.3772734 | - | + | - | - |
| CG34394   | 0.0001399 | 0.3755504 | - | + | - | - |
| CG11426   | 0.0111271 | 0.3755198 | - | + | - | - |



|           |           |           |   |   |   |   |
|-----------|-----------|-----------|---|---|---|---|
| SP1029    | 0.0120826 | 0.3730945 | - | + | - | - |
| CG2993    | 0.0007449 | 0.3722214 | - | + | - | - |
| RNaseX25  | 0.0099335 | 0.3708575 | - | + | - | - |
| CG9360    | 0.0385388 | 0.3696556 | - | + | - | - |
| ey        | 0.0017013 | 0.3673028 | - | + | - | - |
| cpo       | 0.000486  | 0.3670864 | - | + | - | - |
| Klp98A    | 0.0083561 | 0.3661744 | - | + | - | - |
| C3G       | 0.0010023 | 0.3643575 | - | + | - | - |
| Patronin  | 0.001403  | 0.3619348 | - | + | - | - |
| sano      | 0.0325575 | 0.3615196 | - | + | - | - |
| Mbs       | 0.0007225 | 0.3606376 | - | + | - | - |
| CG17119   | 0.0388647 | 0.3598503 | - | + | - | - |
| CG9717    | 0.0045063 | 0.3586177 | - | + | - | - |
| baz       | 0.0015696 | 0.3583474 | - | + | - | - |
| Nfl       | 0.0039548 | 0.3581251 | - | + | - | - |
| CG9727    | 0.0277272 | 0.3581032 | - | + | - | - |
| FER       | 0.0004118 | 0.3564893 | - | + | - | - |
| pgant5    | 0.0040599 | 0.3563914 | - | + | - | - |
| Kal1      | 0.0047339 | 0.3562286 | - | + | - | - |
| ths       | 0.003605  | 0.3560268 | - | + | - | - |
| Bsg25D    | 0.0262311 | 0.3542318 | - | + | - | - |
| Chd64     | 0.0001329 | 0.3535138 | - | + | - | - |
| CG4619    | 0.0018311 | 0.3506797 | - | + | - | - |
| Cpr76Bd   | 0.0274383 | 0.3506225 | - | + | - | - |
| Csk       | 0.0333147 | 0.3442583 | - | + | - | - |
| Cyp4d20   | 0.000434  | 0.3422401 | - | + | - | - |
| NK7.1     | 0.016123  | 0.3414556 | - | + | - | - |
| Mf        | 0.0223839 | 0.3377615 | - | + | - | - |
| unc-13    | 0.0006866 | 0.334777  | - | + | - | - |
| Ca-beta   | 0.029781  | 0.3345227 | - | + | - | - |
| CG34380   | 0.0153187 | 0.3342135 | - | + | - | - |
| Nrx-IV    | 0.01075   | 0.3338862 | - | + | - | - |
| CG42784   | 0.0008249 | 0.3319673 | - | + | - | - |
| Cyp6d5    | 0.0013251 | 0.3319618 | - | + | - | - |
| CG4080    | 0.0062051 | 0.3292463 | - | + | - | - |
| Sod3      | 0.003066  | 0.3277797 | - | + | - | - |
| CG31200   | 0.002006  | 0.322797  | - | + | - | - |
| CG34376   | 0.0131188 | 0.3212085 | - | + | - | - |
| CG32280   | 0.024575  | 0.320953  | - | + | - | - |
| Pak       | 0.0117148 | 0.3186768 | - | + | - | - |
| mgl       | 0.0196658 | 0.3185499 | - | + | - | - |
| Chro      | 0.0311292 | 0.3154825 | - | + | - | - |
| sm        | 0.0046186 | 0.3140033 | - | + | - | - |
| CG33110   | 0.0042753 | 0.3129929 | - | + | - | - |
| CIC-a     | 0.003714  | 0.3128044 | - | + | - | - |
| Ace       | 0.0017376 | 0.3109281 | - | + | - | - |
| drk       | 0.0228834 | 0.3096385 | - | + | - | - |
| AP-1gamma | 0.0054171 | 0.3095854 | - | + | - | - |
| CG8184    | 0.0184085 | 0.3088541 | - | + | - | - |
| capu      | 0.0062435 | 0.3062919 | - | + | - | - |
| blow      | 0.03694   | 0.303811  | - | + | - | - |
| CG10178   | 0.0110523 | 0.3015974 | - | + | - | - |
| Cyp6a17   | 0.0228016 | 0.3012266 | - | + | - | - |
| Hex-A     | 0.0137922 | 0.296618  | - | + | - | - |
| CR44390   | 0.0373395 | 0.2962209 | - | + | - | - |
| CG12207   | 0.0241118 | 0.2905275 | - | + | - | - |
| NaCP60E   | 0.0035355 | 0.2898364 | - | + | - | - |
| CG31705   | 0.0049551 | 0.2883585 | - | + | - | - |

|             |           |           |   |   |   |   |
|-------------|-----------|-----------|---|---|---|---|
| rin         | 0.0100708 | 0.2883034 | - | + | - | - |
| CG10680     | 0.0197029 | 0.2859156 | - | + | - | - |
| SP2637      | 0.0289143 | 0.2855726 | - | + | - | - |
| nAChRalpha5 | 0.0160453 | 0.2835679 | - | + | - | - |
| hppy        | 0.020697  | 0.2832923 | - | + | - | - |
| CG45050     | 0.0382827 | 0.2823186 | - | + | - | - |
| Calx        | 0.0218517 | 0.2820105 | - | + | - | - |
| Cyp12a4     | 0.0240956 | 0.281587  | - | + | - | - |
| CG9572      | 0.0493555 | 0.2775515 | - | + | - | - |
| Acs1        | 0.0087696 | 0.2757455 | - | + | - | - |
| ct          | 0.0428134 | 0.2703958 | - | + | - | - |
| roX1        | 0.0101008 | 0.2697012 | - | + | - | - |
| HDAC4       | 0.0392269 | 0.2694408 | - | + | - | - |
| l(1)G0196   | 0.0054092 | 0.268298  | - | + | - | - |
| Fas1        | 0.0321111 | 0.2642022 | - | + | - | - |
| cg          | 0.0435249 | 0.2637331 | - | + | - | - |
| RN-tre      | 0.0462309 | 0.2564625 | - | + | - | - |
| Sh          | 0.0371534 | 0.2538248 | - | + | - | - |
| Tret1-1     | 0.0182371 | 0.2528711 | - | + | - | - |
| CG9674      | 0.023574  | 0.2469898 | - | + | - | - |
| Octbeta2R   | 0.0331445 | 0.2453472 | - | + | - | - |
| lqf         | 0.0258593 | 0.2433771 | - | + | - | - |
| sima        | 0.0340149 | 0.2433152 | - | + | - | - |
| CG17549     | 0.0225304 | 0.2254686 | - | + | - | - |
| CG6409      | 0.0409064 | 0.1979628 | - | + | - | - |
| CG3226      | 7.654E-13 | 1.1126849 | - | - | + | - |
| CG34409     | 7.966E-11 | 0.9753952 | - | - | + | - |
| mus205      | 8.037E-11 | 0.9301904 | - | - | + | - |
| CG43313     | 2.228E-07 | 0.9174168 | - | - | + | - |
| CG5525      | 8.499E-18 | 0.9171983 | - | - | + | - |
| T-cp1       | 3.096E-10 | 0.911344  | - | - | + | - |
| CG42360     | 2.521E-05 | 0.8155903 | - | - | + | - |
| Tcp-1eta    | 0.0003904 | 0.6573091 | - | - | + | - |
| Tcp-1zeta   | 1.974E-06 | 0.6502018 | - | - | + | - |
| rtet        | 0.0005228 | 0.6415176 | - | - | + | - |
| CG11089     | 4.502E-07 | 0.6404973 | - | - | + | - |
| CIAPIN1     | 2.138E-12 | 0.6351842 | - | - | + | - |
| nclb        | 0.0060139 | 0.6252714 | - | - | + | - |
| CG3038      | 0.0034936 | 0.6202165 | - | - | + | - |
| Rpn6        | 0.0006167 | 0.5676282 | - | - | + | - |
| Abp1        | 0.0024919 | 0.5621353 | - | - | + | - |
| CG10576     | 0.0001525 | 0.5523558 | - | - | + | - |
| ZAP3        | 7.587E-08 | 0.5233941 | - | - | + | - |
| Crag        | 0.0001127 | 0.514296  | - | - | + | - |
| CG11360     | 3.199E-07 | 0.5135391 | - | - | + | - |
| CG14353     | 0.0457725 | 0.5024869 | - | - | + | - |
| unc-45      | 0.0030674 | 0.4858353 | - | - | + | - |
| CG8944      | 0.0226515 | 0.4856579 | - | - | + | - |
| sbr         | 5.016E-07 | 0.4477293 | - | - | + | - |
| Mio         | 0.0001663 | 0.4323495 | - | - | + | - |
| CycD        | 0.0417854 | 0.4302206 | - | - | + | - |
| CG3308      | 0.000311  | 0.4248183 | - | - | + | - |
| CG10516     | 0.004512  | 0.4084588 | - | - | + | - |
| CG7766      | 1.266E-05 | 0.4014969 | - | - | + | - |
| CG7461      | 0.0048853 | 0.3921067 | - | - | + | - |
| CG1109      | 0.0270608 | 0.3733685 | - | - | + | - |
| CG6967      | 0.0420137 | 0.3708813 | - | - | + | - |
| vig2        | 0.0197762 | 0.3344718 | - | - | + | - |

|               |           |           |   |   |   |   |
|---------------|-----------|-----------|---|---|---|---|
| Thiolase      | 0.01242   | 0.3313541 | - | - | + | - |
| CG9776        | 0.0019625 | 0.3285483 | - | - | + | - |
| Mcr           | 0.0385644 | 0.325058  | - | - | + | - |
| Ehbp1         | 0.0174917 | 0.3006158 | - | - | + | - |
| Aac11         | 0.011688  | 0.2976636 | - | - | + | - |
| rempA         | 0.0133481 | 0.2889218 | - | - | + | - |
| babo          | 0.0278498 | 0.2887342 | - | - | + | - |
| CG10103       | 0.0325744 | 0.2865724 | - | - | + | - |
| CG10803       | 0.0398706 | 0.272477  | - | - | + | - |
| CG7206        | 0.0155923 | 0.2713552 | - | - | + | - |
| CG16817       | 0.0271012 | 0.2623899 | - | - | + | - |
| tud           | 0.0390162 | 0.249814  | - | - | + | - |
| eag           | 0.0366914 | 0.2398633 | - | - | + | - |
| Nmda1         | 0.0344096 | 0.2325934 | - | - | + | - |
| Hsp70Bc       | 0         | 5.488537  | - | - | - | - |
| Hsp70Bbb      | 1.36E-128 | 5.0005527 | - | - | - | - |
| Hsp23         | 4.07E-208 | 2.7410785 | - | - | - | - |
| Hsp67Bc       | 1.909E-78 | 2.700527  | - | - | - | - |
| CG13043       | 2.131E-62 | 2.5648242 | - | - | - | - |
| Cpr66D        | 7.291E-38 | 2.5606357 | - | - | - | - |
| CG13044       | 1.618E-24 | 2.4848187 | - | - | - | - |
| CG5172        | 5.519E-53 | 2.4392272 | - | - | - | - |
| Cpr49Ac       | 6.801E-14 | 2.240673  | - | - | - | - |
| Pxd           | 2.546E-32 | 2.1836092 | - | - | - | - |
| CR43482       | 4.888E-12 | 2.1692669 | - | - | - | - |
| CG17298       | 3.091E-57 | 2.1124869 | - | - | - | - |
| CG3281        | 6.415E-48 | 2.0731571 | - | - | - | - |
| CR45890       | 9.804E-14 | 2.0406351 | - | - | - | - |
| CG10625       | 6.001E-17 | 1.8424178 | - | - | - | - |
| Cpr62Bc       | 3.26E-50  | 1.7999574 | - | - | - | - |
| CG43965       | 1.555E-15 | 1.7906257 | - | - | - | - |
| CG8736        | 6.235E-96 | 1.7638316 | - | - | - | - |
| CG6511        | 3.492E-28 | 1.74732   | - | - | - | - |
| CG34232       | 5.71E-22  | 1.7181148 | - | - | - | - |
| CG12998       | 1.198E-10 | 1.7021855 | - | - | - | - |
| Ccp84Aa       | 1.199E-12 | 1.681184  | - | - | - | - |
| lr21a         | 9.176E-16 | 1.6676356 | - | - | - | - |
| CG13926       | 2.258E-22 | 1.6620241 | - | - | - | - |
| CR43609       | 6.316E-12 | 1.6590687 | - | - | - | - |
| CG34217       | 9.653E-09 | 1.6433014 | - | - | - | - |
| Acp1          | 1.449E-62 | 1.6117895 | - | - | - | - |
| Ucp4B         | 1.82E-07  | 1.5885935 | - | - | - | - |
| CG16884       | 4.115E-54 | 1.5646132 | - | - | - | - |
| CG13722       | 5.462E-38 | 1.5420302 | - | - | - | - |
| ninaD         | 3.277E-06 | 1.5394591 | - | - | - | - |
| CR45814       | 1.323E-15 | 1.5325867 | - | - | - | - |
| Ccp84Ab       | 1.164E-29 | 1.5271595 | - | - | - | - |
| CG1416        | 5.804E-59 | 1.525152  | - | - | - | - |
| CG8908        | 2.341E-12 | 1.5249625 | - | - | - | - |
| snoRNA:Psi28S | 1.44E-07  | 1.5040413 | - | - | - | - |
| CG7130        | 6.561E-17 | 1.4849583 | - | - | - | - |
| CG1979        | 3.454E-07 | 1.4582586 | - | - | - | - |
| kkv           | 2.755E-25 | 1.4536861 | - | - | - | - |
| Cpr100A       | 1.713E-27 | 1.4111099 | - | - | - | - |
| CG31296       | 4.896E-05 | 1.3832859 | - | - | - | - |
| fzo           | 2.087E-05 | 1.368624  | - | - | - | - |
| Cct5          | 2.484E-32 | 1.3675507 | - | - | - | - |
| yellow-k      | 7.588E-05 | 1.353758  | - | - | - | - |

|           |           |           |   |   |   |   |
|-----------|-----------|-----------|---|---|---|---|
| CG16719   | 2.532E-05 | 1.3536516 | - | - | - | - |
| CG14961   | 8.332E-09 | 1.3334226 | - | - | - | - |
| CG42323   | 4.854E-12 | 1.3250793 | - | - | - | - |
| Cp18      | 2.172E-06 | 1.3237462 | - | - | - | - |
| CG13063   | 0.0001264 | 1.3201163 | - | - | - | - |
| CG3777    | 9.972E-18 | 1.3113966 | - | - | - | - |
| Cpr92F    | 8.498E-09 | 1.3074914 | - | - | - | - |
| CG9698    | 0.0001664 | 1.299397  | - | - | - | - |
| AOX2      | 0.0001316 | 1.2936922 | - | - | - | - |
| CG7203    | 9.438E-63 | 1.2820094 | - | - | - | - |
| obst-A    | 1.482E-17 | 1.2781386 | - | - | - | - |
| CR44647   | 0.0002497 | 1.2675798 | - | - | - | - |
| yellow-d2 | 8.1E-11   | 1.2566325 | - | - | - | - |
| CR44157   | 0.0001704 | 1.2543964 | - | - | - | - |
| CG2444    | 6.05E-12  | 1.2455427 | - | - | - | - |
| CG12824   | 0.0003353 | 1.244251  | - | - | - | - |
| CG10445   | 2.726E-05 | 1.2441222 | - | - | - | - |
| CG31415   | 3.518E-08 | 1.2433485 | - | - | - | - |
| CR43159   | 0.0003655 | 1.239354  | - | - | - | - |
| nab       | 0.0001403 | 1.2311241 | - | - | - | - |
| CHORD     | 5.032E-15 | 1.2270464 | - | - | - | - |
| CG16710   | 0.0002189 | 1.2250789 | - | - | - | - |
| CG17189   | 1.057E-18 | 1.2249256 | - | - | - | - |
| CG13065   | 3.515E-05 | 1.2141489 | - | - | - | - |
| CecA1     | 0.0005932 | 1.2098714 | - | - | - | - |
| pip       | 3.02E-17  | 1.2019837 | - | - | - | - |
| CG11693   | 0.0002229 | 1.1997395 | - | - | - | - |
| CG14752   | 0.0001805 | 1.1960598 | - | - | - | - |
| CG15517   | 0.0006944 | 1.188152  | - | - | - | - |
| Cpr50Cb   | 0.0002803 | 1.1747705 | - | - | - | - |
| CG5873    | 0.0008365 | 1.1599803 | - | - | - | - |
| spag      | 2.456E-09 | 1.1509393 | - | - | - | - |
| CG40198   | 7.175E-15 | 1.1376845 | - | - | - | - |
| CG17991   | 0.0013094 | 1.1241303 | - | - | - | - |
| CG30178   | 0.0008244 | 1.1200442 | - | - | - | - |
| CG16786   | 1.84E-13  | 1.1186492 | - | - | - | - |
| CR44135   | 0.0014781 | 1.1144428 | - | - | - | - |
| Cda5      | 1.032E-20 | 1.1112645 | - | - | - | - |
| CG15547   | 1.405E-20 | 1.1094287 | - | - | - | - |
| CG32189   | 0.0020625 | 1.1050983 | - | - | - | - |
| CG14258   | 6.25E-07  | 1.0979759 | - | - | - | - |
| CG31320   | 0.0001306 | 1.0934223 | - | - | - | - |
| CG15414   | 3.554E-19 | 1.0927136 | - | - | - | - |
| Cda4      | 3.637E-12 | 1.0917749 | - | - | - | - |
| CR45807   | 7.975E-20 | 1.0907214 | - | - | - | - |
| CG32855   | 0.0008916 | 1.0880765 | - | - | - | - |
| mira      | 0.0021021 | 1.0867095 | - | - | - | - |
| CG8907    | 3.671E-05 | 1.0795849 | - | - | - | - |
| CR18228   | 3.106E-27 | 1.0731965 | - | - | - | - |
| iav       | 0.0001571 | 1.0699389 | - | - | - | - |
| CG7214    | 3.398E-27 | 1.0640346 | - | - | - | - |
| CG14770   | 0.0010726 | 1.0630521 | - | - | - | - |
| CG13713   | 0.0021928 | 1.0494338 | - | - | - | - |
| CG31904   | 8.015E-06 | 1.038233  | - | - | - | - |
| CG7896    | 1.361E-05 | 1.0321213 | - | - | - | - |
| CG1698    | 3.05E-09  | 1.0276509 | - | - | - | - |
| CG9782    | 5.485E-10 | 1.0268152 | - | - | - | - |
| CR44662   | 1.736E-08 | 1.0229924 | - | - | - | - |

|               |           |           |   |   |   |   |
|---------------|-----------|-----------|---|---|---|---|
| CG13183       | 2.661E-07 | 1.0207685 | - | - | - | - |
| CG15545       | 9.397E-08 | 1.0191961 | - | - | - | - |
| Cht5          | 5.17E-09  | 1.017668  | - | - | - | - |
| CG2837        | 1.499E-10 | 1.0100452 | - | - | - | - |
| I(1)G0148     | 8.545E-12 | 1.005065  | - | - | - | - |
| Ance-2        | 0.0032771 | 1.0038085 | - | - | - | - |
| CR45024       | 2.722E-35 | 1.0027764 | - | - | - | - |
| Ccp84Ad       | 0.0051238 | 1.0011268 | - | - | - | - |
| Hsp67Ba       | 7.302E-13 | 0.9983563 | - | - | - | - |
| CG10359       | 2.548E-06 | 0.9973654 | - | - | - | - |
| CG18031       | 0.0012755 | 0.9946981 | - | - | - | - |
| CG7945        | 2.496E-25 | 0.9899398 | - | - | - | - |
| CG9447        | 0.0074029 | 0.9846641 | - | - | - | - |
| tRNA:Y1:22Fb  | 0.0037932 | 0.9809551 | - | - | - | - |
| slx1          | 0.0014948 | 0.9793072 | - | - | - | - |
| scaRNA:PsiU1- | 0.0037289 | 0.9682843 | - | - | - | - |
| CG13426       | 0.0085506 | 0.9681703 | - | - | - | - |
| CG34141       | 0.0056515 | 0.9674096 | - | - | - | - |
| CG13796       | 3.125E-09 | 0.96261   | - | - | - | - |
| CG11327       | 0.0057738 | 0.9570007 | - | - | - | - |
| CG17028       | 0.0057738 | 0.9548141 | - | - | - | - |
| CG18130       | 0.0056334 | 0.9529365 | - | - | - | - |
| spdo          | 0.0066697 | 0.9460031 | - | - | - | - |
| CG3713        | 0.0008566 | 0.9444214 | - | - | - | - |
| Cht6          | 1.293E-12 | 0.9437166 | - | - | - | - |
| Sgs1          | 0.0001103 | 0.9372516 | - | - | - | - |
| CG15023       | 0.0108705 | 0.9344172 | - | - | - | - |
| CecA2         | 0.0047423 | 0.9337694 | - | - | - | - |
| CG10337       | 2.318E-09 | 0.9329518 | - | - | - | - |
| CG12398       | 0.0112722 | 0.9309801 | - | - | - | - |
| CR32745       | 0.0041438 | 0.9291197 | - | - | - | - |
| Nep5          | 0.0031793 | 0.9287769 | - | - | - | - |
| CG15080       | 1.468E-05 | 0.9232588 | - | - | - | - |
| CG10973       | 8.236E-10 | 0.9184633 | - | - | - | - |
| CR43243       | 0.000312  | 0.9163246 | - | - | - | - |
| CG32364       | 5.292E-05 | 0.9153021 | - | - | - | - |
| Clect27       | 6.792E-24 | 0.9128076 | - | - | - | - |
| CG8785        | 2.515E-05 | 0.9071602 | - | - | - | - |
| CG4613        | 0.0152681 | 0.9066747 | - | - | - | - |
| tld           | 8.361E-05 | 0.9059374 | - | - | - | - |
| CR32194       | 0.0001498 | 0.9053254 | - | - | - | - |
| Ccp84Ac       | 0.0048111 | 0.9029752 | - | - | - | - |
| CR46038       | 1.54E-06  | 0.9027152 | - | - | - | - |
| obst-E        | 3.022E-16 | 0.9012115 | - | - | - | - |
| CR33294       | 4.457E-07 | 0.8943715 | - | - | - | - |
| CG15369       | 0.0119996 | 0.8942585 | - | - | - | - |
| CG8292        | 0.0049098 | 0.8933453 | - | - | - | - |
| mthl4         | 0.0138596 | 0.8924174 | - | - | - | - |
| Ubc84D        | 0.0024176 | 0.891544  | - | - | - | - |
| NimA          | 0.0089435 | 0.8889829 | - | - | - | - |
| CG8252        | 0.0162936 | 0.8865505 | - | - | - | - |
| CG41520       | 2.251E-16 | 0.8859804 | - | - | - | - |
| CG14490       | 0.0084744 | 0.883004  | - | - | - | - |
| CG15515       | 0.0109355 | 0.8752539 | - | - | - | - |
| Dhc93AB       | 0.0004083 | 0.8751399 | - | - | - | - |
| CG13449       | 1.409E-06 | 0.8710465 | - | - | - | - |
| CG11852       | 0.0066819 | 0.8706171 | - | - | - | - |
| CR44648       | 0.0183625 | 0.8696203 | - | - | - | - |

|               |           |           |   |   |   |   |
|---------------|-----------|-----------|---|---|---|---|
| CR45985       | 0.008652  | 0.8677686 | - | - | - | - |
| CG17707       | 9.364E-06 | 0.8637108 | - | - | - | - |
| CG8630        | 0.0002072 | 0.8604579 | - | - | - | - |
| CG13082       | 0.0058098 | 0.8585436 | - | - | - | - |
| ppk22         | 0.0007279 | 0.8511233 | - | - | - | - |
| CG15322       | 0.0150654 | 0.8501501 | - | - | - | - |
| CG8219        | 0.0186979 | 0.8452853 | - | - | - | - |
| CG11913       | 0.0142575 | 0.8386232 | - | - | - | - |
| CG8927        | 4.888E-09 | 0.8338071 | - | - | - | - |
| btl           | 0.0030589 | 0.8333549 | - | - | - | - |
| snoRNA:Psi185 | 8.994E-08 | 0.8318425 | - | - | - | - |
| to            | 4.706E-16 | 0.831328  | - | - | - | - |
| CG43646       | 0.0284371 | 0.8300229 | - | - | - | - |
| CG42368       | 2.787E-09 | 0.8259624 | - | - | - | - |
| CG15861       | 0.0003188 | 0.8217635 | - | - | - | - |
| CG5987        | 0.0005968 | 0.8128887 | - | - | - | - |
| CG34375       | 0.0003188 | 0.806558  | - | - | - | - |
| CG5327        | 1.929E-07 | 0.8043976 | - | - | - | - |
| CG30380       | 0.0352612 | 0.8036731 | - | - | - | - |
| CG16926       | 1.614E-05 | 0.8017806 | - | - | - | - |
| CG34327       | 2.012E-05 | 0.7987035 | - | - | - | - |
| CR43483       | 0.0341252 | 0.7948631 | - | - | - | - |
| CR41601       | 0.0331806 | 0.7947222 | - | - | - | - |
| CG31205       | 1.811E-11 | 0.7915891 | - | - | - | - |
| CG13003       | 6.458E-05 | 0.7897247 | - | - | - | - |
| Sgt1          | 6.066E-09 | 0.7884722 | - | - | - | - |
| Ets96B        | 1.985E-05 | 0.7882906 | - | - | - | - |
| CG9509        | 0.0054123 | 0.7814828 | - | - | - | - |
| CG14304       | 0.0109726 | 0.7811625 | - | - | - | - |
| CG31189       | 6.137E-09 | 0.7802033 | - | - | - | - |
| sad           | 0.0430397 | 0.7792498 | - | - | - | - |
| CR43906       | 6.085E-12 | 0.7785324 | - | - | - | - |
| Ag5r          | 0.0392546 | 0.7774368 | - | - | - | - |
| CG9293        | 3.934E-08 | 0.7769647 | - | - | - | - |
| wb            | 0.0001247 | 0.7762965 | - | - | - | - |
| CG6790        | 0.016547  | 0.7756565 | - | - | - | - |
| CG43062       | 0.0337159 | 0.7745227 | - | - | - | - |
| CG12206       | 0.0406122 | 0.7732974 | - | - | - | - |
| yellow-h      | 6.925E-12 | 0.7714112 | - | - | - | - |
| CG15368       | 0.0109726 | 0.7710843 | - | - | - | - |
| CR44096       | 0.0410328 | 0.7708392 | - | - | - | - |
| CG15337       | 0.0470134 | 0.765757  | - | - | - | - |
| CG13618       | 0.0102691 | 0.7655666 | - | - | - | - |
| CG11777       | 7.836E-09 | 0.7620068 | - | - | - | - |
| CG4914        | 3.293E-08 | 0.7620016 | - | - | - | - |
| CR45949       | 0.0468626 | 0.7610684 | - | - | - | - |
| CG11458       | 0.0220193 | 0.7592116 | - | - | - | - |
| CG12992       | 0.046525  | 0.7573876 | - | - | - | - |
| CR44161       | 0.0473114 | 0.7549534 | - | - | - | - |
| CG8192        | 0.0118343 | 0.7491931 | - | - | - | - |
| CG12825       | 0.0009874 | 0.7491561 | - | - | - | - |
| CR45964       | 0.0045492 | 0.747411  | - | - | - | - |
| Cyp313a1      | 8.134E-16 | 0.7450991 | - | - | - | - |
| CG11619       | 0.0090973 | 0.7450226 | - | - | - | - |
| snoRNA:684    | 0.042806  | 0.744687  | - | - | - | - |
| CG11437       | 0.0428826 | 0.744141  | - | - | - | - |
| CG11353       | 0.0339262 | 0.742275  | - | - | - | - |
| bond          | 2.76E-06  | 0.7408082 | - | - | - | - |

|                 |           |           |   |   |   |   |
|-----------------|-----------|-----------|---|---|---|---|
| tw              | 3.716E-06 | 0.739456  | - | - | - | - |
| TTLL3B          | 0.0499875 | 0.7392267 | - | - | - | - |
| CG13377         | 1.764E-09 | 0.7384041 | - | - | - | - |
| CG33137         | 0.0495938 | 0.7377829 | - | - | - | - |
| snoRNA:Me28s    | 0.0495938 | 0.7374387 | - | - | - | - |
| CG45067         | 0.0437888 | 0.7301882 | - | - | - | - |
| CG6074          | 0.0086073 | 0.7274385 | - | - | - | - |
| CG1136          | 2.747E-07 | 0.7253582 | - | - | - | - |
| Cyp6a19         | 3.883E-05 | 0.7247903 | - | - | - | - |
| hh              | 0.0347716 | 0.7240514 | - | - | - | - |
| CG33978         | 4.704E-06 | 0.7232239 | - | - | - | - |
| CR44224         | 0.0174917 | 0.7225574 | - | - | - | - |
| CG11345         | 0.0178999 | 0.7200752 | - | - | - | - |
| CG13606         | 3.254E-13 | 0.7120533 | - | - | - | - |
| CG9624          | 0.0028323 | 0.710471  | - | - | - | - |
| CG17760         | 0.009416  | 0.7090776 | - | - | - | - |
| CG7133          | 2.388E-05 | 0.70523   | - | - | - | - |
| CG31998         | 4.465E-08 | 0.7019142 | - | - | - | - |
| CR43472         | 0.0401604 | 0.7016494 | - | - | - | - |
| pgc             | 0.0042753 | 0.7007469 | - | - | - | - |
| CG34454         | 6.735E-05 | 0.7002958 | - | - | - | - |
| CG15145         | 0.0278576 | 0.695729  | - | - | - | - |
| Ugt86De         | 0.0303877 | 0.6938895 | - | - | - | - |
| CG4576          | 0.0389371 | 0.6936025 | - | - | - | - |
| CG33993         | 0.0008328 | 0.6933065 | - | - | - | - |
| CR44894         | 0.0448091 | 0.6932658 | - | - | - | - |
| CG44163         | 0.0041803 | 0.6922435 | - | - | - | - |
| CG32365         | 0.0083752 | 0.6917019 | - | - | - | - |
| l(2)34Fc        | 1.105E-09 | 0.6882811 | - | - | - | - |
| Peritrophin-A   | 1.289E-09 | 0.6873164 | - | - | - | - |
| Or65c           | 0.0281268 | 0.6840714 | - | - | - | - |
| T3dh            | 0.0026046 | 0.6835891 | - | - | - | - |
| CG16978         | 1.836E-05 | 0.6820876 | - | - | - | - |
| CG42329         | 0.0008709 | 0.6810571 | - | - | - | - |
| CrzR            | 4.221E-06 | 0.6800896 | - | - | - | - |
| CR44172         | 0.0351683 | 0.6796597 | - | - | - | - |
| CR44029         | 6.212E-08 | 0.6796145 | - | - | - | - |
| CG2812          | 0.0014712 | 0.6652083 | - | - | - | - |
| CR44779         | 2.81E-05  | 0.66387   | - | - | - | - |
| Cht3            | 0.0180285 | 0.6619859 | - | - | - | - |
| CG5958          | 4.985E-06 | 0.6596615 | - | - | - | - |
| rdo             | 6.162E-08 | 0.6591501 | - | - | - | - |
| CG31999         | 4.693E-08 | 0.6558828 | - | - | - | - |
| yellow-e        | 2.058E-06 | 0.6554924 | - | - | - | - |
| CR44119         | 0.0157791 | 0.6554551 | - | - | - | - |
| TwdIT           | 0.0079665 | 0.6532474 | - | - | - | - |
| CG10077         | 3.735E-09 | 0.65317   | - | - | - | - |
| CG42494         | 0.007825  | 0.6512487 | - | - | - | - |
| CR46065         | 0.0122433 | 0.650982  | - | - | - | - |
| E(spl)mdelta-HI | 0.0294006 | 0.6499998 | - | - | - | - |
| Rpt4R           | 0.0003399 | 0.647109  | - | - | - | - |
| CG34138         | 0.0419599 | 0.6469816 | - | - | - | - |
| CG17104         | 0.0003635 | 0.6409957 | - | - | - | - |
| CG7065          | 3.101E-05 | 0.6402409 | - | - | - | - |
| GCC185          | 0.0022976 | 0.639831  | - | - | - | - |
| CR44850         | 2.071E-05 | 0.6392069 | - | - | - | - |
| Sip1            | 2.734E-06 | 0.634054  | - | - | - | - |
| CR44960         | 1.47E-10  | 0.6339367 | - | - | - | - |

|              |           |           |   |   |   |   |
|--------------|-----------|-----------|---|---|---|---|
| snoRNA:Me28s | 0.0222164 | 0.6310605 | - | - | - | - |
| CG14301      | 0.0015556 | 0.6227886 | - | - | - | - |
| slow         | 7.279E-06 | 0.6220897 | - | - | - | - |
| Vm34Ca       | 0.043487  | 0.6210349 | - | - | - | - |
| CR43864      | 0.0192643 | 0.6210217 | - | - | - | - |
| CG4221       | 0.0006687 | 0.6208443 | - | - | - | - |
| CG16749      | 0.0495109 | 0.6204999 | - | - | - | - |
| CR43170      | 0.0149589 | 0.6182392 | - | - | - | - |
| Cpr64Aa      | 0.0007648 | 0.6158149 | - | - | - | - |
| CG18155      | 0.049034  | 0.6135614 | - | - | - | - |
| CG13437      | 0.0446674 | 0.611761  | - | - | - | - |
| CG32793      | 0.0486795 | 0.6104001 | - | - | - | - |
| CG5493       | 0.0006436 | 0.6094728 | - | - | - | - |
| CG11413      | 0.0076186 | 0.6084175 | - | - | - | - |
| CR45185      | 8.577E-05 | 0.6009167 | - | - | - | - |
| CG32801      | 0.0346815 | 0.5996874 | - | - | - | - |
| CG34461      | 0.0053321 | 0.5987041 | - | - | - | - |
| Cralbp       | 0.0025074 | 0.5983043 | - | - | - | - |
| FoxP         | 3.167E-06 | 0.5972337 | - | - | - | - |
| l(2)01289    | 0.0151181 | 0.5952788 | - | - | - | - |
| dmGlut       | 0.0019282 | 0.5924498 | - | - | - | - |
| sage         | 0.0059674 | 0.5817529 | - | - | - | - |
| Cpr67B       | 7.691E-08 | 0.5782376 | - | - | - | - |
| Osi9         | 0.0423936 | 0.5759417 | - | - | - | - |
| CR31514      | 0.024355  | 0.575189  | - | - | - | - |
| dsb          | 2.858E-06 | 0.5739531 | - | - | - | - |
| CR44986      | 5.054E-09 | 0.5704676 | - | - | - | - |
| CG13188      | 4.091E-06 | 0.5660526 | - | - | - | - |
| CG17032      | 0.000461  | 0.5649563 | - | - | - | - |
| CG16789      | 0.0027901 | 0.5582603 | - | - | - | - |
| CG8854       | 0.0009291 | 0.5548993 | - | - | - | - |
| net          | 0.0167797 | 0.5489787 | - | - | - | - |
| CG5482       | 5.832E-06 | 0.5487248 | - | - | - | - |
| ckd          | 0.0280282 | 0.5484434 | - | - | - | - |
| CG42249      | 0.0139852 | 0.5452406 | - | - | - | - |
| wat          | 1.06E-06  | 0.5431667 | - | - | - | - |
| Dyrk3        | 6.39E-07  | 0.5379421 | - | - | - | - |
| CG10553      | 0.0016439 | 0.5372748 | - | - | - | - |
| CG10175      | 0.0005648 | 0.5357213 | - | - | - | - |
| Cpr47Ef      | 0.0273791 | 0.5318535 | - | - | - | - |
| CG32243      | 0.0170282 | 0.5308973 | - | - | - | - |
| CG12428      | 0.0061814 | 0.5306202 | - | - | - | - |
| SAK          | 0.000103  | 0.5292731 | - | - | - | - |
| Cpr64Ac      | 0.0384637 | 0.5290126 | - | - | - | - |
| CG42846      | 0.0030706 | 0.5285191 | - | - | - | - |
| gt           | 0.0045492 | 0.5253903 | - | - | - | - |
| GstD10       | 0.0435543 | 0.5236712 | - | - | - | - |
| l(2)efl      | 0.0146638 | 0.5216287 | - | - | - | - |
| Cpr47Ee      | 0.0015177 | 0.5211642 | - | - | - | - |
| CG13793      | 0.0260779 | 0.5211606 | - | - | - | - |
| CG6332       | 0.0316971 | 0.5196039 | - | - | - | - |
| CG3267       | 0.0450102 | 0.5195788 | - | - | - | - |
| Tm2          | 0.000464  | 0.5144335 | - | - | - | - |
| Mif          | 9.244E-06 | 0.5116847 | - | - | - | - |
| ana1         | 0.0032529 | 0.5091097 | - | - | - | - |
| Cog7         | 0.0002815 | 0.5068511 | - | - | - | - |
| CG3984       | 0.0122348 | 0.5046454 | - | - | - | - |
| CG17912      | 1.302E-08 | 0.5046214 | - | - | - | - |



|                |           |           |   |   |   |   |
|----------------|-----------|-----------|---|---|---|---|
| Mitf           | 1.474E-06 | 0.5037994 | - | - | - | - |
| CG3921         | 0.0102519 | 0.5036626 | - | - | - | - |
| Cyp6t3         | 0.018884  | 0.5028446 | - | - | - | - |
| Cyp28d2        | 0.0133307 | 0.5023763 | - | - | - | - |
| CG15449        | 0.0154251 | 0.4996563 | - | - | - | - |
| CG15479        | 0.0176316 | 0.4966364 | - | - | - | - |
| CR44704        | 1.501E-07 | 0.496077  | - | - | - | - |
| CG5458         | 0.0242446 | 0.4951541 | - | - | - | - |
| CR46089        | 0.0002355 | 0.4936433 | - | - | - | - |
| b6             | 0.0063636 | 0.486088  | - | - | - | - |
| CR44969        | 7.67E-07  | 0.4837203 | - | - | - | - |
| CR45713        | 0.0416927 | 0.4836999 | - | - | - | - |
| CG17211        | 0.0001962 | 0.4826557 | - | - | - | - |
| Sir2           | 0.0002172 | 0.4810991 | - | - | - | - |
| sxe2           | 1.186E-07 | 0.4783955 | - | - | - | - |
| Rbm13          | 0.0025092 | 0.4777112 | - | - | - | - |
| mGluR          | 0.0003013 | 0.4771569 | - | - | - | - |
| CG12661        | 0.0356532 | 0.4722997 | - | - | - | - |
| CG8671         | 0.0005091 | 0.4722558 | - | - | - | - |
| CG44085        | 0.0001173 | 0.4688447 | - | - | - | - |
| CG9519         | 0.0109167 | 0.4676666 | - | - | - | - |
| Ccs            | 0.0245849 | 0.4646258 | - | - | - | - |
| Buffy          | 0.0222213 | 0.4629119 | - | - | - | - |
| CR42491        | 0.0133814 | 0.4601922 | - | - | - | - |
| CG13833        | 0.000611  | 0.4599915 | - | - | - | - |
| CG13025        | 0.0084719 | 0.459727  | - | - | - | - |
| CG32579        | 0.0278498 | 0.45501   | - | - | - | - |
| rtv            | 0.0101704 | 0.4548423 | - | - | - | - |
| CG6845         | 0.0026622 | 0.4545612 | - | - | - | - |
| CG7457         | 1.782E-05 | 0.4538208 | - | - | - | - |
| CG34057        | 0.0282083 | 0.4530421 | - | - | - | - |
| Mlc2           | 6.847E-06 | 0.4488486 | - | - | - | - |
| CG9747         | 0.0018214 | 0.4476455 | - | - | - | - |
| r-l            | 0.0052137 | 0.4459699 | - | - | - | - |
| Cyp4d21        | 0.0005166 | 0.4448861 | - | - | - | - |
| CG4266         | 0.001367  | 0.4437907 | - | - | - | - |
| CG4294         | 0.0038753 | 0.4415685 | - | - | - | - |
| CR43989        | 0.0494059 | 0.4414023 | - | - | - | - |
| drd            | 0.0089435 | 0.4404595 | - | - | - | - |
| asparagine-syn | 0.000573  | 0.4377089 | - | - | - | - |
| CG13624        | 0.0004748 | 0.4374424 | - | - | - | - |
| CG9400         | 0.0341402 | 0.4343294 | - | - | - | - |
| CR43361        | 0.0170271 | 0.4343017 | - | - | - | - |
| CG7402         | 0.0074663 | 0.4328881 | - | - | - | - |
| CR45350        | 0.0006945 | 0.4320364 | - | - | - | - |
| Cep135         | 0.0340052 | 0.4299423 | - | - | - | - |
| CG9297         | 0.0201509 | 0.4284883 | - | - | - | - |
| CR45007        | 0.0294849 | 0.4263765 | - | - | - | - |
| Ephrin         | 0.0014948 | 0.4262495 | - | - | - | - |
| Rhp            | 0.0304784 | 0.4218299 | - | - | - | - |
| CG8665         | 0.0014186 | 0.4183863 | - | - | - | - |
| scaf           | 0.0026661 | 0.4170545 | - | - | - | - |
| FKBP59         | 0.0035815 | 0.4162016 | - | - | - | - |
| CG9640         | 0.0133104 | 0.4150049 | - | - | - | - |
| nAChRalpha4    | 0.001347  | 0.4145998 | - | - | - | - |
| Cf2            | 0.0012729 | 0.4099199 | - | - | - | - |
| CR42860        | 0.0344932 | 0.4076586 | - | - | - | - |
| Mlp84B         | 0.0035355 | 0.4015474 | - | - | - | - |

|         |           |           |   |   |   |   |
|---------|-----------|-----------|---|---|---|---|
| Obp57b  | 0.0002189 | 0.4014088 | - | - | - | - |
| ABCB7   | 9.203E-05 | 0.4013452 | - | - | - | - |
| CG5867  | 5.139E-06 | 0.3999117 | - | - | - | - |
| CG9512  | 0.0150285 | 0.3963588 | - | - | - | - |
| Zasp66  | 0.0109278 | 0.3956866 | - | - | - | - |
| CG6912  | 0.000396  | 0.3926816 | - | - | - | - |
| CG12567 | 0.0156213 | 0.3926436 | - | - | - | - |
| CG2789  | 0.0005571 | 0.3891366 | - | - | - | - |
| CR43470 | 0.0030189 | 0.3823516 | - | - | - | - |
| CG13794 | 0.0047228 | 0.378702  | - | - | - | - |
| Obp49a  | 0.007837  | 0.378694  | - | - | - | - |
| CG1889  | 0.0403675 | 0.375135  | - | - | - | - |
| kon     | 0.043487  | 0.3738164 | - | - | - | - |
| CR43425 | 0.0001531 | 0.3737367 | - | - | - | - |
| TBCB    | 0.0110046 | 0.3671772 | - | - | - | - |
| CG42388 | 0.0099113 | 0.3662493 | - | - | - | - |
| CG12090 | 0.0017386 | 0.365294  | - | - | - | - |
| Ada2a   | 0.0267936 | 0.3651984 | - | - | - | - |
| MED26   | 0.0006503 | 0.3650063 | - | - | - | - |
| CG1316  | 0.0135073 | 0.3641103 | - | - | - | - |
| Psi     | 0.0027733 | 0.3635087 | - | - | - | - |
| Drsl5   | 0.0286325 | 0.3631775 | - | - | - | - |
| Rbp1    | 0.000742  | 0.3603868 | - | - | - | - |
| Drep-1  | 0.0316593 | 0.3601786 | - | - | - | - |
| CG17167 | 0.0247587 | 0.3595363 | - | - | - | - |
| CG34207 | 0.0239756 | 0.3545999 | - | - | - | - |
| CG1041  | 0.0109278 | 0.3539631 | - | - | - | - |
| CG3793  | 0.0180215 | 0.3534665 | - | - | - | - |
| CG8317  | 0.0056798 | 0.3513187 | - | - | - | - |
| DIP2    | 0.0154645 | 0.3482253 | - | - | - | - |
| CG41099 | 0.0078113 | 0.3480682 | - | - | - | - |
| CG8475  | 0.0008993 | 0.3475596 | - | - | - | - |
| CR44990 | 0.0392269 | 0.3466239 | - | - | - | - |
| CG1674  | 0.0342754 | 0.3460804 | - | - | - | - |
| Sh3beta | 0.0075425 | 0.3425209 | - | - | - | - |
| CG1124  | 0.0018767 | 0.3420107 | - | - | - | - |
| Set1    | 0.0101509 | 0.3406345 | - | - | - | - |
| gfzf    | 0.0377792 | 0.3405052 | - | - | - | - |
| CG31321 | 0.0099555 | 0.3394276 | - | - | - | - |
| MSBP    | 0.0025862 | 0.3393996 | - | - | - | - |
| CG10249 | 0.0104975 | 0.3337272 | - | - | - | - |
| Mlc1    | 0.0497008 | 0.3328105 | - | - | - | - |
| Cyp6g1  | 0.0003323 | 0.3305547 | - | - | - | - |
| CG2278  | 0.0159078 | 0.3293326 | - | - | - | - |
| myo     | 0.0232111 | 0.3258258 | - | - | - | - |
| CG3209  | 0.0017362 | 0.323553  | - | - | - | - |
| onecut  | 0.0118886 | 0.3225305 | - | - | - | - |
| CG11414 | 0.0477183 | 0.3220051 | - | - | - | - |
| CG3191  | 0.0220193 | 0.3217604 | - | - | - | - |
| ade3    | 0.0054517 | 0.3213964 | - | - | - | - |
| CG8079  | 0.0158333 | 0.3207189 | - | - | - | - |
| CG15661 | 0.0055458 | 0.3192079 | - | - | - | - |
| CG43092 | 0.0105374 | 0.3176296 | - | - | - | - |
| Ubp64E  | 0.0363619 | 0.3158031 | - | - | - | - |
| PebIII  | 0.0135572 | 0.3099721 | - | - | - | - |
| CR43964 | 0.040752  | 0.3036579 | - | - | - | - |
| sowah   | 0.0496675 | 0.3004368 | - | - | - | - |
| conu    | 0.0205902 | 0.2972424 | - | - | - | - |

|             |           |           |   |   |   |   |
|-------------|-----------|-----------|---|---|---|---|
| CR45682     | 0.0486244 | 0.2966368 | - | - | - | - |
| CG43291     | 0.0405267 | 0.2961615 | - | - | - | - |
| CG31712     | 0.0128124 | 0.2924603 | - | - | - | - |
| CG12582     | 0.0277849 | 0.2907358 | - | - | - | - |
| CG42235     | 0.0484066 | 0.288166  | - | - | - | - |
| CG31199     | 0.0270116 | 0.2849924 | - | - | - | - |
| CR44690     | 0.0102519 | 0.2797072 | - | - | - | - |
| roX2        | 0.0237091 | 0.2796652 | - | - | - | - |
| alpha-Man-I | 0.0145618 | 0.2780122 | - | - | - | - |
| su(w[a])    | 0.0288496 | 0.266999  | - | - | - | - |
| CaMKII      | 0.0278709 | 0.2612034 | - | - | - | - |
| CG32000     | 0.0311922 | 0.2588601 | - | - | - | - |
| nonA        | 0.0216287 | 0.2558683 | - | - | - | - |
| CR45601     | 0.0232351 | 0.2469571 | - | - | - | - |
| CG2076      | 0.0472667 | 0.2455416 | - | - | - | - |
| CG8974      | 0.0492926 | 0.2454298 | - | - | - | - |
| Ank         | 0.0220338 | 0.2449155 | - | - | - | - |
| CG2321      | 0.0443043 | 0.2448766 | - | - | - | - |
| Yp1         | 0.0111271 | 0.2440312 | - | - | - | - |
| CG1632      | 0.0269572 | 0.2407545 | - | - | - | - |
| CG17698     | 0.0398031 | 0.2170329 | - | - | - | - |
| Inr-a       | 0.0377257 | 0.2080048 | - | - | - | - |
| Yp2         | 0.0252767 | 0.2018107 | - | - | - | - |

**Supplementary Table 9** Mapping summary in ChIP-seq and nuclear RNA-seq analysis

| ChIP-seq            | Input reads | Uniquely mapped reads | Mapping rate |
|---------------------|-------------|-----------------------|--------------|
| CBP_naive1          | 11,622,571  | 10,140,169            | 87.25%       |
| CBP_naive2          | 12,883,750  | 10,378,327            | 80.55%       |
| CBP_naive3          | 13,984,685  | 10,971,584            | 78.45%       |
| CBP_5minLight1      | 14,670,203  | 11,920,429            | 81.26%       |
| CBP_5minLight2      | 16,387,875  | 13,735,653            | 83.82%       |
| CBP_5minLight3      | 15,386,636  | 12,059,922            | 78.38%       |
| CoRest-C_naive1     | 14,044,052  | 5,035,629             | 35.86%       |
| CoRest-C_naive2     | 13,624,091  | 5,997,394             | 44.02%       |
| CoRest-C_naive3     | 14,068,291  | 4,155,139             | 29.54%       |
| CoRest-C_5minLight1 | 7,710,889   | 3,637,016             | 47.17%       |
| CoRest-C_5minLight2 | 12,693,280  | 7,499,826             | 59.09%       |
| CoRest-C_5minLight3 | 14,840,103  | 7,262,224             | 48.94%       |
| Rpd3_naive1         | 12,663,514  | 9,146,812             | 72.23%       |
| Rpd3_naive2         | 11,736,300  | 7,749,778             | 66.03%       |
| Rpd3_naive3         | 13,181,257  | 9,542,370             | 72.39%       |
| Rpd3_5minLight1     | 13,263,141  | 5,872,746             | 44.28%       |
| Rpd3_5minLight2     | 12,567,451  | 8,256,347             | 65.70%       |
| Rpd3_5minLight3     | 13,711,110  | 10,429,489            | 76.07%       |
| Input               | 12,836,771  | 10,449,877            | 81.41%       |

  

| Nuclear RNA-seq             | Input reads | Uniquely mapped reads | Mapping rate |
|-----------------------------|-------------|-----------------------|--------------|
| nRNAseq_naive1              | 19,712,179  | 18,107,447            | 91.86%       |
| nRNAseq_naive2              | 16,929,889  | 15,134,101            | 89.39%       |
| nRNAseq_naive3              | 13,661,735  | 12,522,852            | 91.66%       |
| nRNAseq_5minLight1          | 17,183,396  | 15,698,394            | 91.36%       |
| nRNAseq_5minLight2          | 21,433,850  | 19,660,967            | 91.73%       |
| nRNAseq_5minLight3          | 22,045,647  | 19,982,508            | 90.64%       |
| nRNAseq_5minLight5minRest1  | 21,681,759  | 19,178,118            | 88.45%       |
| nRNAseq_5minLight5minRest2  | 21,127,023  | 18,810,955            | 89.04%       |
| nRNAseq_5minLight5minRest3  | 19,066,142  | 16,945,663            | 88.88%       |
| nRNAseq_5minLight10minRest1 | 22,215,469  | 19,782,388            | 89.05%       |
| nRNAseq_5minLight10minRest2 | 17,872,798  | 16,048,670            | 89.79%       |
| nRNAseq_5minLight10minRest3 | 19,468,450  | 17,479,866            | 89.79%       |
| nRNAseq_5minLight15minRest1 | 12,174,444  | 11,020,456            | 90.52%       |
| nRNAseq_5minLight15minRest2 | 14,977,933  | 13,563,166            | 90.55%       |
| nRNAseq_5minLight15minRest3 | 18,535,205  | 16,866,439            | 91.00%       |
